# Supplementary material for: Strong confinement of active microalgae leads to inversion of vortex flow and enhanced mixing
Source: eLife. 2021 Nov 22;10:e67663. doi: 10.7554/eLife.67663 (PMC8758135; doi:10.7554/eLife.67663)
Supplement: Figure 1—source data 1. [file elife-67663-fig1-data1.xlsx]

## Sheet: Sheet1
Figure 1F: Histogram plot of cell body diameter in H = 10 micron
								Cell diameter (D) in micron
H10 Wobbler			H10 Synchronous				Cell index ↓	H10 Wobbler	H10 Synchronous
Bin edges (micron)	Probability		Bin edges (micron)	Probability			1	8.3	11.81
8.1	0.0428571		10.5	0.0142857			2	8.9	11.96
8.49	0.0142857		10.89	0.0714286			3	9.87	11.2
8.88	0.0571429		11.28	0.0285714			4	8.92	11.48
9.27	0.0571429		11.67	0.1			5	9.97	11.77
9.66	0.1		12.06	0.114286			6	10.8	11.69
10.05	0.0857143		12.45	0.0571429			7	9.76	11.73
10.44	0.128571		12.84	0.0285714			8	9.69	11.95
10.83	0.0142857		13.23	0.0142857			9	9.91	12.43
11.22	0		13.62	0.0142857			10	10.87	13.19
11.61	0		14.01	0.0428571			11	12.36	11.72
12	0.0142857		14.4				12	10.43	13.15
12.39							13	9.56	11.11
							14	9.55	10.95
							15	8.87	13.44
							16	8.33	12.52
							17	10.65	12.31
							18	9.91	12.5
							19	10.81	11.17
							20	10.45	14.33
							21	10.52	14.12
							22	9.12	13.93
							23	10.3	14.3
							24	9.36	11.61
							25	10.33	12.84
							26	9.48	10.51
							27	10.33	12.44
							28	10.81	12.48
							29	10.06	12.22
							30	10.09	12.28
							31	10.7	12.4
							32	10.45	12.34
							33	9.93	11.27
							34	8.33	12.31
							35	8.88
							36	10.62
							Mean	9.92	12.28
							Std	0.85	0.94
							*Std denotes standard deviation of the data
