# Supplementary material for: Strong confinement of active microalgae leads to inversion of vortex flow and enhanced mixing
Source: eLife. 2021 Nov 22;10:e67663. doi: 10.7554/eLife.67663 (PMC8758135; doi:10.7554/eLife.67663)
Supplement: Figure 2—source data 1. [file elife-67663-fig2-data1.xlsx]

## Sheet: Sheet1
Figure 2A: Trajectories of representative 25 cells in H = 30 micron
	X-coordinates of the H30 cell trajectories (micron)																											Y-coordinates of the H30 cell trajectories (micron)
Cell index →	1	2	3	4	5	6	7	8	9	10	11	12	13	14	15	16	17	18	19	20	21	22	23	24	25			1	2	3	4	5	6	7	8	9	10	11	12	13	14	15	16	17	18	19	20	21	22
Time (s) ↓
0	0	0	0	0	0	0	0	0	0	0	0	0	0	0	0	0	0	0	0	0	0	0	0	0	0			0	0	0	0	0	0	0	0	0	0	0	0	0	0	0	0	0	0	0	0	0	0
0.01	-1.21164	-0.15996	0.23736	0.9888	1.22628	0.1452	0.0342	0.40776	-0.07476	-0.03156	0.30876	0.78216	2.24028	0.00804	0.3738	-0.1404	0.1842	-0.46656	2.45892	-0.09696	0.76524	0.08844	0.28752	0.11028	0.78612			-1.2534	-0.27024	0.31824	-0.12336	1.44396	0.65304	-0.00888	-1.22976	-0.73596	0.4902	-0.20388	-0.17148	-0.21084	-0.00684	-0.60708	-0.21372	0.0456	0.3114	1.81104	-0.64704	0.05616	-0.5376
0.02	-1.65024	-1.56	-2.69064	1.77948	1.3542	1.18848	-1.58136	0.65652	-0.249	-0.48	1.5336	2.64156	2.26416	1.34616	0.89148	-0.1206	1.20012	-1.53204	2.56896	-0.70668	-2.0766	0.50064	0.5586	-0.08388	1.1442			-1.80612	-2.04504	0.5862	-0.171	1.07808	1.7466	-0.6018	-2.3346	-1.5072	1.83048	-0.82536	-0.93624	-0.43332	2.23008	-1.746	-0.3954	-0.31692	-0.13632	1.89972	1.94592	0.00912	-2.39124
0.03	-2.9058	-0.50184	-2.15676	3.74904	2.41656	1.35636	-1.61028	1.26624	-0.68364	-0.8424	2.71488	2.31096	4.63128	1.18872	1.18224	-0.27828	2.07408	-1.91544	3.48948	-0.32292	-2.40036	0.58212	0.92052	0.1074	2.0964			-3.1578	-1.70508	0.66168	-0.39396	2.09664	2.29236	-0.90288	-4.353	-2.98296	3.24216	-1.45416	-1.00176	-0.57624	2.04216	-2.21664	-0.7386	-0.78192	0.33036	2.71248	2.3346	-0.21072	-2.32788
0.04	-3.14448	-1.77576	-5.08356	3.70632	3.72372	2.36352	-3.17796	1.14384	-0.89088	-1.09188	3.45912	4.6206	4.36596	2.73096	2.02224	-0.39912	3.09	-2.844	4.7232	-1.45008	-3.0762	0.72768	1.04328	-0.0456	2.21772			-3.49524	-3.2532	0.9324	-0.4296	3.4152	3.73632	-1.23468	-4.62996	-3.33348	3.58536	-1.72236	-1.74336	-0.72012	4.75584	-3.42696	-0.98388	-1.18872	0.34632	4.03008	4.071	-0.11628	-3.66336
0.05	-4.41972	-2.22576	-5.01228	6.3174	3.34068	3.00372	-3.31044	1.47144	-1.63428	-1.67208	4.89912	4.31928	6.92892	2.2818	2.1918	-0.63324	4.58304	-3.39384	4.61364	-1.3068	-4.76376	0.63084	1.4646	-0.10104	3.39864			-5.08488	-4.07172	0.9462	-0.69756	3.46608	4.44192	-1.5522	-6.35988	-4.87764	5.04984	-2.50752	-1.59012	-0.93984	4.04328	-3.60828	-1.19712	-1.61004	0.65448	3.78288	4.53876	0.14124	-4.11504
0.06	-4.47864	-2.751	-7.0836	6.10884	4.5498	3.8082	-4.5432	1.21044	-1.92732	-1.82988	5.24616	6.52848	6.71196	3.37404	3.14304	-0.858	5.01624	-4.19496	6.30612	-2.18292	-5.0322	0.98316	1.50972	-0.087	3.35448			-5.00748	-4.9692	1.24644	-0.93348	4.19928	5.57424	-1.81284	-6.58692	-5.8242	6.05256	-2.52288	-2.31108	-1.15212	7.28376	-4.92516	-1.38612	-2.01084	0.78744	5.93832	5.80536	-0.30312	-5.451
0.07	-5.69064	-3.02988	-7.73328	7.8126	4.87296	4.85448	-5.10312	1.68252	-2.27292	-2.205	7.41864	6.71304	9.0414	3.24948	3.33972	-1.08156	6.33144	-4.97304	6.03372	-2.6082	-5.51532	0.8142	1.90944	0.05988	4.476			-6.90924	-5.5056	1.335	-0.88836	5.18712	6.42888	-2.1288	-8.79276	-6.4722	6.67524	-3.4278	-2.424	-1.2546	7.12752	-5.26464	-1.70916	-2.29152	0.87828	5.76108	6.97308	0.3228	-5.80188
0.08	-5.98464	-4.50108	-8.7714	8.44092	5.2572	5.49132	-5.68524	1.54632	-2.82828	-2.70912	7.39224	7.683	8.80764	3.5184	4.40724	-1.14324	6.35124	-5.72244	7.3806	-2.72148	-7.38132	1.30944	1.9614	-0.1134	4.40232			-6.98184	-7.06548	1.63116	-1.11024	4.74768	7.2444	-2.42424	-8.79024	-8.09568	8.36316	-3.34092	-2.766	-1.44708	9.36204	-6.43188	-2.63568	-2.61228	1.21296	7.24452	7.40232	0.2604	-7.20816
0.09	-6.62676	-5.28348	-10.5518	9.41964	6.14472	6.90888	-6.77196	1.94268	-3.05664	-3.01116	9.95496	9.51624	11.3687	3.86568	4.42116	-1.326	8.46972	-6.74196	7.97784	-3.77868	-6.88572	1.47924	2.36424	0.28824	5.51688			-8.21868	-7.9518	1.79448	-1.06644	6.45828	8.40552	-2.62284	-11.5735	-8.46588	9.05604	-4.06428	-3.22884	-1.554	10.0398	-6.64728	-4.0032	-3.20556	1.11696	8.1612	8.77776	0.58596	-8.21652
0.1	-6.8322	-5.68548	-10.906	10.2073	6.07104	7.16928	-7.14744	2.20164	-3.60216	-3.31824	10.1468	9.26436	11.1462	3.81852	5.8668	-2.08224	8.11788	-7.21056	7.9998	-3.51576	-8.9406	1.69104	1.8768	-0.03156	5.57412			-8.54148	-8.57016	2.10984	-1.06308	6.00096	8.80032	-2.90508	-11.0335	-9.83244	9.78492	-4.00752	-3.33156	-1.65096	11.181	-7.89864	-4.5822	-3.26712	1.4082	8.30208	9.1746	0.71112	-9.00432
0.11	-7.79544	-6.5592	-12.8567	11.5655	7.27752	8.97372	-8.94564	2.34228	-3.96528	-3.83976	11.4103	11.641	13.91	4.044	5.67072	-1.95072	10.4452	-8.99964	9.97632	-4.94148	-9.00444	2.30904	2.265	0.342	6.46704			-10.042	-10.0307	2.39712	-1.14396	7.6758	10.3624	-3.11952	-13.5793	-10.9457	11.7444	-4.32216	-4.2108	-1.79664	12.3508	-8.0868	-4.58988	-4.15152	1.34076	10.0272	10.8877	0.7728	-11.137
0.12	-7.80264	-6.3654	-12.9782	12.4552	7.932	8.9928	-8.63256	3.00672	-4.2336	-4.13208	11.9822	11.2438	13.6753	4.00212	7.37484	0.43104	10.1556	-8.8878	9.43584	-4.37976	-9.40944	2.28456	1.77336	0.19788	6.68976			-10.3374	-10.0086	2.60256	-1.18344	8.81184	10.5092	-3.43008	-14.0027	-11.438	12.3893	-4.31664	-3.91344	-1.92756	12.9828	-9.45636	-4.23876	-4.09548	1.70292	9.8694	10.8761	0.97308	-10.7448
0.13	-8.91672	-8.3034	-15.5149	13.3806	7.66068	10.9316	-10.7686	2.95584	-4.53624	-4.50144	13.2779	12.8833	15.9901	4.3224	7.13916	0.87192	12.1386	-10.8838	11.3495	-5.66856	-12.2928	3.132	2.12664	0.42408	7.53588			-12.2711	-12.4015	3.05292	-1.15092	8.79672	12.2252	-3.7428	-14.5872	-12.7986	13.8145	-4.72632	-4.58352	-1.9392	14.7384	-9.60864	-4.23096	-4.96176	1.62996	11.4346	12.7705	1.38192	-13.8325
0.14	-9.07752	-8.04588	-15.3426	14.9173	8.93616	10.6564	-10.3685	3.2598	-4.64076	-4.89936	13.7242	14.065	16.0072	4.35636	8.98848	0.32844	12.4531	-10.5124	11.263	-5.208	-11.6027	2.89728	2.10036	0.58632	7.8996			-12.5052	-11.9392	3.00648	-1.19796	9.981	12.1804	-3.88296	-16.0829	-13.6708	15.398	-4.50972	-5.01684	-2.08368	15.4308	-11.077	-4.5096	-4.7814	1.93104	11.4868	12.6287	1.16952	-13.2359
0.15	-10.069	-9.3978	-18.654	15.428	8.86236	12.8962	-11.8069	3.41208	-4.71072	-5.16336	15.401	13.7868	18.188	4.81608	8.71296	-0.26028	13.7108	-12.5327	12.0478	-6.42288	-13.1584	3.75816	2.28312	0.78864	8.51784			-14.4221	-14.064	3.33636	-1.18668	10.7171	14.0861	-4.32372	-16.5592	-14.1835	15.9328	-4.95684	-5.16696	-2.10984	17.3746	-11.2957	-4.89504	-5.55432	1.8882	12.2951	14.4368	1.87692	-15.8812
0.16	-10.309	-9.285	-17.9561	17.4928	9.23052	12.5952	-12.725	3.91068	-4.80888	-5.29788	15.8354	16.164	18.3589	4.7796	10.5014	-0.69288	14.7311	-12.7524	13.4845	-6.13296	-14.6682	3.84912	2.37372	0.95544	9.02568			-14.7457	-13.7609	3.47916	-1.23648	10.3843	14.0658	-4.53504	-19.0481	-15.4942	17.8742	-4.98216	-5.86584	-2.24484	17.7764	-12.3967	-5.13288	-5.6754	2.33136	13.7032	14.55	2.66088	-16.323
0.17	-11.298	-10.7413	-21.031	17.4577	10.246	14.2019	-13.1118	4.18932	-4.6878	-5.5872	17.2403	15.5777	20.3722	5.42052	10.245	-0.75156	14.7952	-14.0886	13.0464	-7.05828	-14.7562	4.56132	2.66796	1.1712	9.64176			-16.547	-15.5939	3.29412	-1.12428	12.1982	16.254	-5.02404	-19.1156	-16.4044	18.81	-5.43444	-5.86752	-2.44212	19.9813	-12.5747	-5.46984	-5.96904	2.2074	13.4285	16.0444	2.32116	-17.4515
0.18	-11.51	-10.8318	-21.422	20.0088	10.0122	14.1658	-14.474	4.24668	-4.67496	-5.83884	18.5052	17.5806	20.8048	5.40228	12.311	-0.57348	16.7593	-14.3981	15.2599	-7.62888	-15.7866	5.3214	2.81196	1.24872	10.2835			-17.0334	-16.1998	3.19464	-1.12056	11.7157	16.3205	-5.20824	-20.8144	-16.816	19.6412	-5.75616	-6.51216	-2.65524	19.9211	-13.7639	-5.7402	-6.78096	2.53452	15.3497	16.7924	2.86188	-19.1992
0.19	-12.5447	-12.079	-22.8384	19.554	11.2788	15.6326	-14.3366	4.46664	-3.98736	-5.92056	18.9748	18.2258	22.9038	6.20904	11.9083	-0.5538	16.379	-15.7727	14.9778	-7.61028	-16.6826	5.62536	3.27792	1.45848	10.6892			-18.434	-17.2841	2.96772	-1.05924	13.5661	18.3996	-5.62464	-21.3014	-18.6026	21.5117	-5.84316	-6.84624	-3.01536	22.3661	-13.9697	-6.27312	-6.78708	2.57232	15.1463	17.4187	3.04908	-19.5318
0.2	-12.7043	-12.3217	-24.721	22.329	11.7788	15.6744	-15.9809	4.33056	-3.4824	-6.0918	20.9592	18.5668	23.4446	6.29952	13.7755	-0.45576	18.679	-16.2224	15.9086	-8.92704	-16.749	6.59376	3.32664	1.45212	10.7513			-19.1231	-17.8446	2.58732	-1.28352	14.3335	18.5017	-6.03072	-23.368	-18.291	22.0511	-6.41568	-6.66888	-3.17892	22.1304	-14.8578	-6.66924	-8.22876	2.77884	16.021	19.5955	2.98524	-21.4524
0.21	-13.7674	-13.2748	-24.5934	21.862	11.5356	17.2084	-15.9884	4.53312	-2.60736	-6.0912	20.6353	21.0714	25.1428	6.67536	13.8217	-1.23828	18.675	-17.2738	17.4155	-8.2836	-18.5485	6.90348	3.95232	1.61628	11.3836			-19.9978	-18.4087	2.52852	-1.28856	14.4313	20.3164	-6.40056	-23.6047	-19.4392	23.406	-6.5322	-7.16268	-3.60792	24.5732	-15.2614	-6.65712	-7.99764	2.99976	17.5103	18.9432	3.82356	-21.691
0.22	-14.1004	-13.5904	-27.5785	24.5096	12.5755	17.6849	-17.5574	4.24428	-1.599	-5.93256	22.7027	20.2696	26.1673	6.92532	15.3218	-3.19692	20.1259	-17.9246	16.9085	-9.20352	-18.9241	7.28952	4.17828	1.72068	12.1184			-21.1865	-19.1969	1.70196	-1.44516	15.2232	20.8026	-7.02012	-26.7714	-20.3257	24.859	-6.61944	-7.0986	-3.92304	24.1099	-15.9139	-5.83236	-9.11556	3.17616	17.0525	21.605	3.46656	-22.8163
0.23	-14.4395	-14.2132	-26.9485	24.4129	13.0151	18.8192	-17.5146	4.15668	-1.37076	-6.1506	22.8409	22.3813	27.3425	7.0236	15.4816	-4.93248	21.1709	-18.7656	19.1076	-9.50988	-19.7663	7.83888	4.81584	1.48668	12.5844			-21.0755	-19.4712	1.8126	-1.37784	16.3284	22.1286	-7.10148	-26.3884	-20.6	25.3639	-7.09392	-7.00884	-4.29588	26.0405	-16.2422	-4.095	-9.76536	3.43776	18.9919	21.9996	3.97608	-23.1943
0.24	-15.6552	-14.8872	-29.954	25.9703	12.9696	19.387	-18.8414	4.05324	-0.34056	-5.59284	23.8124	23.6142	28.484	7.65372	16.85	-4.7514	21.7685	-19.6111	19.1719	-9.47028	-21.8834	8.26764	5.082	1.7334	13.5162			-22.8372	-20.4192	0.87864	-1.37664	16.378	22.701	-7.7832	-28.7964	-21.868	26.9332	-6.83484	-7.08852	-4.75428	26.3167	-16.9969	-2.95284	-10.2724	3.42156	19.1131	22.927	4.88748	-24.6192
0.25	-15.6739	-15.231	-29.4974	27.2604	14.3958	20.6005	-19.0009	3.53256	0.13152	-5.56032	24.5602	23.7481	29.4103	7.5894	17.2468	-3.09384	23.383	-20.3152	19.9384	-10.1105	-21.3364	8.90988	5.6436	1.71396	13.5984			-22.5808	-20.5264	0.7722	-1.48872	18.8579	23.9588	-7.75476	-29.4092	-22.4648	28.0111	-7.1514	-7.1694	-5.07024	27.0088	-17.3999	-2.3274	-11.8079	3.91488	19.8616	24.9073	4.50048	-25.447
0.26	-17.3594	-16.0026	-31.9853	27.9828	14.5907	21.237	-20.5099	3.8418	0.65616	-5.45892	25.3607	26.2186	30.9281	8.68452	18.3239	-0.34968	23.4018	-21.096	21.5328	-10.056	-23.9657	9.1248	5.92284	1.7568	14.7019			-24.6052	-21.3659	-0.0372	-1.46796	18.7054	24.6857	-8.84916	-30.309	-23.1262	28.6574	-6.95136	-7.28616	-5.82528	28.0855	-18.2416	-3.49656	-11.7922	3.75684	21.0131	24.846	5.83428	-26.1533
0.27	-17.1049	-16.5912	-32.1823	29.8378	14.597	22.5474	-21.0442	3.384	1.66116	-4.66236	26.3849	26.1088	31.5818	8.60544	18.7734	0.81984	24.9396	-21.651	21.2725	-10.2659	-24.0716	9.6594	6.55932	1.77876	14.6645			-24.365	-21.7637	-0.2454	-1.47804	19.5218	26.0058	-8.94864	-32.2103	-24.6388	30.4808	-6.98988	-7.1718	-5.92968	28.0782	-18.6336	-5.06028	-13.1904	4.25916	20.9645	27.6236	6.19812	-28.1335
0.28	-18.9332	-17.2979	-33.5465	30.074	15.6112	23.0966	-21.9026	3.40908	2.01672	-4.7082	27.5524	27.7111	33.238	9.70356	19.8251	1.422	24.9388	-22.6504	22.8316	-10.6922	-24.5639	9.64404	6.60132	1.63836	15.7478			-26.1384	-22.6477	-0.74544	-1.55172	20.7277	26.5061	-9.5784	-32.4155	-24.8801	31.26	-7.19424	-7.36176	-6.70188	29.8531	-19.5752	-5.96448	-13.3492	4.43724	22.6204	27.4723	6.25752	-28.0084
0.29	-18.6349	-17.7558	-35.1192	32.4928	15.6827	24.6841	-23.292	3.71364	2.81208	-4.35552	28.3118	28.7052	33.8953	9.705	20.3586	1.84236	25.9097	-23.2404	22.8923	-10.6662	-26.2618	10.2319	7.33692	2.06376	15.668			-26.3047	-22.8715	-1.3728	-1.86144	21.1946	28.0399	-10.3013	-35.0214	-25.9114	31.8576	-7.2234	-7.38924	-6.78048	30.263	-19.9219	-6.68568	-14.3845	4.59696	22.3597	29.1841	6.46428	-30.8014
0.3	-20.0035	-18.6287	-35.0569	32.0945	16.0613	25.0098	-23.207	3.06948	3.65676	-3.60912	29.0477	28.9058	35.5044	10.5271	21.1435	1.90356	26.1907	-23.8057	23.5078	-10.9597	-26.782	9.96948	7.31916	1.76328	17.0189			-27.0965	-24.05	-1.45584	-1.84356	21.8882	28.3364	-10.2511	-35.1077	-26.908	33.7751	-7.77828	-7.32672	-7.61388	32.9105	-21.1271	-6.951	-14.4132	4.92372	23.5962	30.1358	7.03956	-30.3232
0.31	-20.5163	-19.1018	-37.7944	34.704	16.9514	26.2096	-24.8854	3.53928	3.90528	-3.4044	30.8089	31.2754	35.8267	10.5734	21.8011	0.26088	27.6182	-24.5336	24.208	-11.153	-27.1794	10.8635	8.1744	2.18664	17.0671			-28.0447	-23.5428	-2.22984	-2.46744	23.4695	29.5682	-11.5424	-36.5215	-27.3005	33.9334	-8.23788	-7.7952	-7.54692	32.7059	-21.7242	-6.09828	-15.8989	4.95924	24.3224	30.3415	6.48768	-32.7358
0.32	-21.1025	-20.6399	-37.2792	34.415	16.7088	27.0161	-24.9846	3.68244	5.23464	-2.49408	30.8796	30.8304	37.7461	10.9854	22.0866	-2.70876	27.7879	-25.0847	24.406	-11.4943	-28.8006	10.4276	7.53984	2.25792	18.1465			-28.1903	-24.7614	-2.28696	-2.20968	23.1451	30.5592	-11.1102	-37.1694	-28.7593	35.6393	-8.55072	-7.54872	-8.45952	35.8175	-22.8534	-3.9612	-15.9235	5.46804	24.5857	33.0468	7.39236	-32.9078
0.33	-22.1105	-20.2558	-39.8274	36.3284	17.9173	27.8734	-26.3083	3.8706	5.44344	-1.59108	32.7527	33.1663	38.0894	10.9946	22.7581	-3.6042	29.1828	-25.969	24.9355	-11.7425	-28.693	11.1431	8.71752	2.19876	18.3574			-29.1416	-23.529	-2.86488	-3.18636	25.4105	31.5608	-12.4481	-38.9728	-29.2331	36.6104	-9.26436	-8.0016	-8.46096	35.1848	-23.5854	-2.1378	-17.34	5.22624	26.3263	32.318	6.8682	-33.6151
0.34	-22.5536	-21.9706	-39.5329	36.8929	18.3512	28.6079	-26.3608	3.82812	6.28644	-1.05432	32.9708	33.7021	39.9274	11.4812	23.0616	-3.11724	29.5452	-26.2925	25.2322	-11.7055	-30.6574	11.311	8.07468	2.44752	19.2392			-29.379	-24.1966	-3.04392	-2.9268	25.1747	32.5913	-12.1015	-39.3846	-30.1459	36.8078	-9.57324	-8.01396	-9.31932	38.4721	-24.56	-0.78912	-17.7624	5.9838	25.9578	34.7152	8.07216	-34.7896
0.35	-24.1741	-21.496	-41.7076	37.5607	18.3551	29.3526	-27.7283	4.30776	7.29972	0.02484	34.1231	34.4552	40.2182	11.3394	23.7716	-1.00032	30.7548	-27.4084	25.6978	-12.1477	-30.6464	11.7545	9.82704	2.3316	19.588			-30.8546	-23.9604	-3.0378	-3.63672	25.9667	33.4398	-13.3133	-41.3422	-31.1941	38.3324	-9.86412	-8.0406	-9.38172	38.2786	-25.2995	-1.077	-18.7726	5.76864	27.9221	34.6954	7.87836	-34.7258
0.36	-24.0875	-23.7403	-42.1013	38.668	19.384	30.3038	-28.4149	4.0872	7.40784	0.4338	34.4353	36.437	42.0842	11.8848	24.1157	0.84252	31.2372	-27.9383	25.8859	-12.2198	-31.5509	12.4433	9.10176	2.53056	20.2868			-30.7696	-24.2515	-3.45936	-3.8268	26.9735	34.7658	-13.6674	-42.3247	-31.4527	38.8956	-10.3535	-8.41104	-10.0988	40.6626	-26.3963	-2.07132	-19.2679	6.6696	27.7282	36.4254	8.2272	-37.3856
0.37	-26.0472	-23.9836	-42.9329	39.3577	19.168	30.7934	-29.066	4.25436	8.7678	0.96324	35.9454	35.9087	42.2317	11.9934	24.7676	1.06044	32.3092	-28.8306	26.3129	-12.3607	-33.6768	12.398	10.5142	2.4642	20.8374			-33.1038	-24.4067	-2.79492	-4.19424	27.0412	35.393	-13.9606	-42.581	-32.7211	40.0349	-10.8904	-8.3058	-10.1995	41.3984	-27.0557	-2.88444	-19.9891	6.31728	29.166	37.3764	9.36132	-36.9408
0.38	-25.9579	-24.988	-45.1427	40.6852	20.0568	31.8738	-30.223	4.7874	9.03348	2.1768	35.8799	38.4833	44.1908	12.3166	24.9785	-0.94704	33.1739	-29.5646	26.7334	-12.5714	-33.0181	13.0967	10.6316	2.4822	21.4159			-32.8685	-24.8982	-2.51364	-4.65132	28.4814	37.1388	-14.9686	-44.8757	-32.9413	41.4544	-11.2358	-8.66064	-10.7935	42.9354	-28.215	-1.76136	-20.9819	7.25796	30.2183	37.423	8.8842	-39.8794
0.39	-27.1721	-26.0068	-44.5112	41.2481	20.5566	32.1877	-30.4106	4.68744	9.80868	2.27316	37.9274	38.2752	44.2076	12.4993	25.5308	-2.40768	33.6997	-30.1568	26.7436	-12.8472	-35.5148	12.8731	13.4105	2.3916	22.4622			-34.8956	-25.2678	-2.58348	-4.83432	29.3333	37.611	-14.6173	-44.5144	-33.8032	41.9614	-11.812	-8.45004	-10.9576	43.9614	-28.5644	0.39024	-21.2351	6.76896	30.2255	40.4126	9.72984	-39.3366
0.4	-27.4228	-26.3024	-47.3264	42.9082	20.6314	33.2878	-31.8114	5.4294	10.4069	2.96628	37.967	39.83	46.6067	12.6712	25.8018	-1.51308	35.0968	-31.0841	27.4474	-12.8604	-36.398	13.9198	13.6751	2.34576	22.6687			-35.1988	-25.5329	-1.72044	-5.23596	29.5184	39.3336	-16.0886	-47.8157	-34.0967	43.219	-12.0634	-8.63808	-11.5516	44.7586	-30.0055	1.19028	-22.2325	7.626	32.3815	39.7734	9.98664	-41.935
0.41	-28.1202	-28.184	-47.385	43.1219	21.825	33.4686	-31.8799	5.39976	10.7922	3.46536	39.9984	40.9692	46.3646	12.9445	26.4528	-0.15612	35.1826	-31.5845	26.9924	-13.1891	-36.4746	13.6466	15.5411	2.37228	23.6604			-36.169	-26.0912	-1.89324	-5.4534	31.5751	39.6157	-15.7178	-47.5336	-34.4456	44.3125	-12.6266	-8.72148	-11.561	46.9985	-30.2333	0.3108	-22.2889	7.24428	31.6933	41.5136	9.54372	-41.7775
0.42	-28.2685	-28.057	-49.1986	45.4409	22.085	34.7902	-33.3743	5.87856	11.6572	3.97464	40.035	41.1269	49.1173	12.9425	26.6009	0.34404	36.4996	-32.5508	26.8772	-13.3156	-39.4805	14.8092	15.3746	2.3118	23.9728			-36.8137	-26.0456	-1.00704	-5.99868	31.1939	41.7545	-17.1908	-50.4757	-35.3254	45.1337	-12.8405	-8.54964	-12.3882	46.7424	-31.4086	-1.91604	-22.9613	7.84632	34.075	43.077	9.50772	-44.1186
0.43	-29.1286	-30.3066	-49.5184	44.9647	22.1102	34.8434	-33.2701	5.93484	12.0644	4.73172	42.1063	43.258	48.8654	13.3583	27.1528	1.28448	36.4955	-32.9699	27.3413	-13.5715	-38.8808	15.036	15.2935	2.60904	25.1568			-37.9544	-26.4865	-1.17576	-5.94036	31.9093	41.8219	-16.8422	-50.3248	-35.6791	46.1749	-13.3286	-8.8536	-12.329	50.0107	-31.6	-2.35008	-22.8943	7.53216	34.888	42.8902	9.5856	-44.5764
0.44	-29.5134	-29.7964	-50.5392	47.7896	23.0575	36.3794	-35.1172	6.21588	12.7675	5.0268	42.3574	42.7534	51.2525	13.3574	27.3826	3.045	38.5336	-34.0625	27.0793	-14.0851	-40.4291	15.3212	17.3695	2.62092	25.1375			-38.9184	-26.524	-0.4236	-6.7482	33.2881	44.1841	-18.4117	-52.7533	-36.6041	47.6572	-13.5557	-8.61984	-12.9584	49.3274	-33.1505	-2.41104	-23.882	7.85568	33.586	45.9631	9.74652	-45.6114
0.45	-30.3612	-32.1203	-51.2532	47.256	22.892	36.35	-35.0864	6.61596	13.6798	5.0532	44.0791	45.2074	50.988	13.5978	27.8636	1.533	38.2931	-34.3243	25.8526	-14.0232	-42.6576	16.3756	16.9015	3.01308	26.105			-40.0021	-26.8118	-0.342	-6.46548	33.0485	44.1595	-18.3737	-53.2729	-37.8442	48.4578	-13.9524	-9.07956	-12.9972	51.9851	-33.2426	-2.12052	-23.8334	7.59384	35.8922	45.3078	9.70464	-47.187
0.46	-31.1305	-32.0656	-51.8146	49.8572	23.6778	37.9592	-36.1117	6.47352	14.0009	6.1254	44.8362	44.9243	53.6656	13.4224	28.0372	0.73776	40.6105	-35.5532	25.8673	-14.6362	-42.0049	16.2583	17.0543	2.94828	26.1829			-41.0804	-26.8674	0.17544	-7.25796	34.8341	46.1402	-19.0658	-54.2251	-38.3732	50.0758	-14.2637	-8.85984	-13.6364	52.2964	-34.5714	-1.94844	-24.4122	7.7478	36.2722	46.6532	9.4908	-47.4293
0.47	-31.7875	-33.9497	-52.9139	50.2901	24.2462	37.9843	-37.3538	6.74832	14.9801	6.81216	45.976	46.2277	53.2138	13.6388	28.4536	2.77476	41.2558	-36.021	25.3088	-15.1098	-43.8406	17.0942	17.9394	3.27888	27.0065			-41.9815	-27.074	0.7518	-7.2954	35.5619	46.3993	-20.1722	-55.5235	-39.8467	50.6102	-14.5142	-9.47724	-13.6349	54.0377	-34.6968	-2.4912	-24.7998	7.81584	36.4043	48.3011	10.2502	-48.8256
0.48	-32.6616	-34.1341	-53.668	50.9924	24.3876	39.3852	-37.1874	6.75936	15.5405	7.33968	47.4434	48.2689	55.9423	13.4532	28.8824	3.28944	42.695	-37.1747	24.4584	-15.0931	-44.9004	16.8316	18.6694	3.1164	27.284			-43.1821	-27.0828	1.2336	-7.64616	35.7068	48.099	-19.8762	-56.4184	-40.7442	51.5036	-14.8622	-9.9756	-13.979	55.2	-35.9774	-2.88624	-25.109	7.70472	38.208	48.4466	10.1593	-49.0019
0.49	-33.0635	-35.6256	-54.8749	52.412	25.4689	39.6078	-39.4276	6.96768	15.901	7.92612	47.7662	47.3856	55.626	13.4474	29.4398	1.67484	43.7808	-37.9104	24.5774	-16.4749	-45.0016	17.8723	17.8148	3.50928	27.6731			-43.7358	-27.1222	1.87128	-8.0328	38.2876	48.6095	-21.7319	-58.0583	-41.4488	53.1318	-15.0358	-9.53196	-14.1186	55.8194	-36.3388	-2.2092	-25.5102	7.88076	38.3653	50.7521	10.4292	-50.8349
0.5	-34.1161	-36.4571	-55.4135	52.5097	25.1339	40.7813	-39.1878	7.13268	17.0071	8.55912	50.0831	48.9785	58.2941	13.528	29.7798	3.03804	44.7839	-38.7588	23.6945	-16.1912	-46.0156	17.9879	19.141	3.33936	28.2948			-45.24	-27.3494	2.25336	-8.15316	37.7263	49.9663	-21.4216	-59.159	-42.9004	53.7678	-15.4637	-10.398	-14.2903	57.3515	-37.3712	-2.5632	-25.7838	7.50408	39.246	50.6622	10.4392	-51.3733
0.51	-34.0688	-37.3568	-56.8751	54.4238	26.1748	41.1882	-40.7648	7.47012	17.2146	9.762	49.9645	50.1941	58.1914	13.5434	30.326	4.73712	46.3486	-39.6469	23.6782	-17.1246	-47.316	18.5844	20.102	3.62928	28.3796			-45.3577	-27.3272	2.84208	-8.7606	39.1955	50.6142	-22.5048	-60.8506	-43.3522	54.5968	-15.2345	-10.9998	-14.4888	57.6444	-37.7999	-4.37208	-26.084	7.7028	39.9708	52.1518	10.9938	-52.4749
0.52	-35.3791	-38.5478	-57.127	54.4506	26.4254	42.1229	-41.3755	7.51932	17.9537	9.75024	52.2607	50.3605	60.5707	13.6727	30.4228	4.07868	46.9037	-40.3894	23.027	-17.7043	-47.1306	19.6351	20.9184	3.55212	29.3728			-47.2982	-27.4226	3.09636	-8.77752	40.3637	51.8198	-23.1917	-61.506	-44.3515	55.5562	-15.9749	-11.0614	-14.5345	59.5457	-38.5807	-3.87024	-26.2069	7.43496	39.9976	53.585	11.1438	-54.0991
0.53	-35.3432	-39.252	-59.1628	56.7554	26.6495	42.5695	-41.8492	8.04828	18.8478	10.0662	52.095	52.9433	60.4211	13.4609	31.4782	4.37316	48.7349	-41.4304	22.6903	-17.4344	-50.1536	19.7711	21.3812	3.44532	29.3729			-47.3312	-27.0392	3.89196	-9.76188	40.4815	52.3884	-23.4336	-63.6463	-45.4385	56.1846	-15.6712	-12.2216	-14.6356	59.6284	-39.1133	-2.30916	-26.6537	7.56936	41.21	53.4372	11.5182	-54.214
0.54	-36.6658	-40.7228	-58.9009	56.3017	27.0772	43.2475	-43.3054	8.02536	19.1323	10.3908	53.1946	52.4908	62.7745	13.5172	31.9524	4.62276	48.981	-41.9558	22.3016	-18.8347	-49.8109	20.8534	21.6104	3.48972	30.0865			-49.491	-26.7518	4.07604	-9.59904	41.5703	53.4599	-24.5053	-63.8693	-45.9098	58.2035	-16.3616	-12.109	-14.6635	62.1529	-39.9876	-2.31336	-26.6812	7.31232	40.7015	55.9361	11.2057	-56.3504
0.55	-36.4861	-40.4554	-61.2926	58.97	27.7366	44.1108	-43.2012	8.289	20.0525	11.1978	53.7876	53.9599	62.9726	13.4485	32.88	4.18248	51.0224	-43.0015	21.9494	-18.2194	-50.7502	20.8036	22.7533	3.54996	30.3181			-49.3962	-26.9546	4.91244	-10.73	42.6452	54.2078	-24.5824	-65.7364	-46.8772	58.0548	-16.3649	-12.8447	-14.823	63.0006	-40.3584	-3.1422	-27.3821	7.27392	42.1462	55.6194	11.5721	-56.0251
0.56	-37.986	-41.3498	-60.9836	58.5361	27.8738	44.5932	-44.9922	8.019	20.6713	11.2622	54.8581	55.5137	64.9684	13.3297	33.4871	5.32668	50.8895	-43.5857	21.3037	-19.57	-52.5598	21.8702	23.3779	3.3684	31.2606			-51.8801	-26.197	5.1012	-10.6345	42.6784	55.0187	-25.9187	-65.6082	-47.6359	59.3376	-16.8799	-13.606	-14.8784	64.1968	-41.1974	-5.0364	-27.2351	7.263	41.8124	57.7223	12.0821	-58.2822
0.57	-37.8727	-41.9155	-63.4028	61.0381	28.778	46.1744	-44.5438	7.86192	20.9614	11.8579	55.3135	55.0482	65.4316	13.1754	34.7527	4.57968	53.1566	-44.7082	21.1355	-19.5334	-52.8336	22.232	24.4339	3.65076	31.3009			-51.6028	-26.3452	5.87184	-11.5951	44.7847	55.6669	-25.7131	-67.9926	-48.1189	59.5975	-16.861	-13.4606	-15.0558	66.1852	-41.7788	-5.84268	-28.1614	6.89112	43.3111	58.2457	11.6138	-58.1093
0.58	-39.4121	-43.0499	-62.8771	61.1876	28.5154	46.565	-46.4473	7.7946	21.9373	12.2779	57.2194	57.3428	67.2464	13.1238	35.313	5.03448	52.9462	-45.1141	20.5456	-19.8784	-53.5229	22.5055	24.7686	3.3378	32.3011			-53.8103	-26.2022	5.99472	-11.6521	44.3105	56.3303	-27.3433	-67.8534	-49.2258	60.0245	-17.4668	-14.6771	-14.9912	66.4075	-42.4775	-6.03252	-28.02	7.13232	42.9236	59.1119	12.4168	-59.2004
0.59	-39.174	-43.4537	-65.5586	62.7104	29.5729	48.2066	-46.3999	7.59312	22.4588	12.8947	57.4661	57.1014	67.7759	12.905	36.506	4.50924	55.2384	-46.2852	20.4724	-20.7542	-54.8598	23.0059	25.4854	3.69996	32.4037			-53.6114	-26.2849	7.2966	-12.2377	46.1713	56.1587	-27.3697	-70.9229	-49.9184	60.3848	-17.4764	-14.7234	-15.2791	68.9665	-43.0429	-5.56536	-29.2052	6.46464	43.9372	60.6464	12.0828	-60.0644
0.6	-40.9129	-44.6678	-65.3104	63.4727	29.4342	48.6325	-47.1874	7.49232	22.8827	13.1788	59.2552	58.4	69.7364	13.0746	36.7904	3.58212	55.1286	-46.8026	19.9475	-20.3303	-54.6277	23.3479	25.819	3.5244	33.1939			-55.3166	-26.1919	7.29612	-12.5795	46.8722	56.3874	-28.2506	-70.6272	-50.4881	60.8243	-17.992	-15.4298	-15.2977	68.3839	-43.6222	-5.6166	-28.8499	6.97644	45.1061	60.693	12.6788	-61.1262
0.61	-40.9604	-45.1157	-66.7042	64.1746	29.788	51.0467	-48.4916	6.72336	24.1199	13.2518	60.1901	59.5528	70.3985	12.5532	38.0185	4.25688	56.436	-47.7989	19.4506	-21.8909	-56.3165	24.0506	26.5519	3.80808	33.3158			-55.7166	-26.2244	8.66568	-12.8818	47.1641	56.387	-29.6509	-73.4606	-51.8053	61.5367	-18.261	-15.8833	-15.4962	71.4136	-44.0516	-7.90236	-29.9006	6.24528	44.5135	63.1889	12.6217	-62.0988
0.62	-41.805	-46.4947	-67.2811	65.9975	30.1333	50.9834	-47.893	6.98268	24.26	13.725	61.111	59.4929	71.5577	12.5404	37.9577	4.13808	56.9478	-48.0755	18.9522	-21.2216	-56.6303	24.2401	26.924	3.77472	34.0625			-56.327	-26.2867	8.8842	-13.448	48.1872	56.4344	-29.1038	-73.4539	-52.014	62.6269	-18.4878	-16.0148	-15.4727	71.0854	-44.4822	-7.51716	-30.0302	6.7674	47.2444	62.8043	12.7592	-62.4121
0.63	-42.6125	-46.7183	-67.7809	66.0499	30.3761	53.4826	-49.4498	6.69396	25.3924	13.7365	62.6642	61.8682	72.7514	12.192	39.4812	4.08084	57.9419	-49.2168	18.9798	-22.5948	-56.8015	25.6962	27.8334	3.9288	34.3861			-57.4169	-26.0326	10.2522	-13.596	48.7997	56.7074	-30.9277	-76.6141	-53.0377	63.0307	-18.9074	-17.1361	-15.8698	73.734	-44.967	-6.72372	-30.7152	6.08208	46.4436	64.9122	13.0398	-64.63
0.64	-42.7378	-48.9324	-68.0851	68.3964	30.5994	53.491	-49.6319	6.52872	26.505	13.6064	63.0912	61.2839	73.3414	12.3461	39.5344	5.1678	58.0858	-49.458	18.0685	-22.3829	-59.0678	25.7816	27.9414	3.9618	34.84			-57.3179	-25.9768	10.5889	-14.442	49.198	56.6616	-31.3223	-77.19	-53.9042	63.7124	-19.1006	-16.9667	-15.8482	73.964	-45.6557	-8.77344	-31.0622	6.73884	45.9151	64.965	13.0008	-64.545
0.65	-43.9414	-48.5368	-69.1753	68.2104	31.1771	55.9468	-50.0838	6.8556	26.8116	13.8493	64.82	63.1559	75.0322	12.0677	41.0746	4.94628	60.0066	-50.5688	16.8282	-23.2619	-58.4255	26.5212	28.9836	4.05792	34.9367			-58.8886	-25.9115	11.6417	-14.3117	51.763	57.1718	-32.059	-78.4398	-54.1512	64.8726	-19.6283	-17.8729	-16.4698	75.6473	-45.9582	-8.78952	-32.2122	6.08856	48.5033	66.4478	13.1449	-65.8522
0.66	-44.1413	-50.9458	-69.5206	70.4455	30.9632	56.0538	-50.7077	5.97024	28.3158	13.8269	65.3189	63.9809	75.3809	12.2311	41.1203	4.2102	59.8769	-50.8886	17.0872	-23.8915	-59.6209	27.1307	29.2382	4.119	35.2818			-58.8968	-25.7376	11.8181	-15.2722	51.0097	57.2094	-32.6184	-79.4933	-55.204	65.24	-19.7791	-18.3648	-16.2169	76.7579	-46.5355	-7.62252	-32.142	6.61632	47.8774	67.2672	14.3933	-66.3293
0.67	-45.0965	-50.7421	-71.0078	70.0885	31.5842	58.3799	-50.7962	4.98456	29.2562	13.9537	67.0776	64.232	77.077	11.9124	42.4868	4.13724	61.866	-51.5656	16.1524	-23.6345	-61.6124	27.5502	30.334	4.06524	35.4298			-60.4808	-25.5536	13.0526	-14.8891	53.4668	57.7793	-33.2078	-80.1466	-55.8353	66.3754	-20.5321	-18.587	-17.177	77.6274	-46.9806	-9.744	-33.506	6.24312	48.2443	67.5764	14.8382	-67.3692
0.68	-45.266	-52.7286	-71.6075	72.4477	31.8246	58.5602	-52.025	5.14368	29.8234	14.595	67.21	66.1846	77.4024	11.7754	42.6026	3.97428	61.806	-52.3799	14.5716	-24.8236	-60.6919	28.1818	30.275	4.20636	35.6402			-60.5095	-25.539	13.3835	-16.1324	54.5828	57.8906	-34.5421	-83.0425	-56.2351	67.5043	-20.5405	-19.418	-17.0396	79.2842	-47.4995	-9.73848	-33.451	6.498	50.1697	69.9754	14.4658	-67.7129
0.69	-46.4321	-52.6789	-72.8297	72.0884	31.6332	60.8502	-51.5458	5.8452	31.3387	14.4743	69.2533	65.6858	79.2038	11.8349	43.6784	3.98724	63.4472	-53.3032	14.8732	-24.5164	-63.1255	28.7825	31.9999	4.20852	35.6365			-62.3027	-25.3208	14.1624	-15.7752	54.6782	58.6032	-34.4516	-83.2736	-57.3422	67.9114	-21.3457	-19.2949	-18.2466	79.7242	-48.056	-9.0048	-35.1967	6.4644	49.2551	69.5447	15.9368	-69.1592
0.7	-46.4749	-54.6914	-73.9308	74.4916	32.2337	61.1281	-53.1816	6.28548	31.8467	15.1117	68.9309	68.309	79.3565	11.585	43.9142	4.41216	63.7856	-53.553	13.2874	-25.2484	-63.6938	29.5163	31.8262	4.01832	36.0372			-62.3188	-25.3576	14.7839	-17.2231	55.7942	58.638	-36.5772	-86.4715	-57.5563	69.1805	-21.2214	-20.5763	-18.1062	81.2162	-48.5521	-10.5888	-35.4029	6.3522	49.4797	71.6376	16.5709	-70.2733
0.71	-47.6311	-54.6509	-74.7391	74.3143	32.31	62.9779	-52.897	6.02172	32.8001	15.1778	71.5268	68.1706	81.1279	11.5259	44.7713	4.40664	64.7274	-54.2669	12.881	-25.7098	-64.1189	29.8865	33.0586	4.05276	35.8718			-64.2036	-25.2917	15.3461	-16.8407	56.9154	59.4098	-36.4141	-86.167	-58.2216	69.8022	-22.2337	-20.5543	-19.3026	81.6078	-48.9952	-9.75444	-36.712	7.1712	49.9328	72.4254	16.616	-70.8708
0.72	-47.5924	-56.6429	-75.8102	76.4125	32.3584	63.7435	-53.6734	6.60564	34.1834	15.5184	70.8722	69.0529	81.1673	11.3095	45.1878	3.63036	65.8076	-55.2701	12.4956	-25.9412	-64.914	30.8716	32.8238	4.09056	36.3709			-64.0507	-25.1713	15.8815	-18.2369	56.6168	59.6891	-37.5902	-87.9113	-59.084	70.6542	-22.32	-20.9897	-18.9648	82.903	-49.7252	-9.83868	-37.8692	6.85176	48.9451	73.5716	17.3446	-72.667
0.73	-49.0106	-56.5297	-76.4964	76.3332	33.3307	65.0113	-54.4248	6.63132	34.6092	15.5448	72.9026	71.1655	83.2408	11.0718	46.0237	2.99616	66.3294	-55.1176	10.7587	-26.4452	-65.459	30.9869	34.3262	4.12776	36.3385			-66.3557	-25.0152	16.0595	-18.1182	59.2459	60.1891	-38.5321	-89.2558	-59.3226	71.9821	-22.7885	-21.959	-20.2855	83.5273	-50.3281	-10.9895	-38.7398	7.58592	50.0365	75.0656	17.2999	-72.8318
0.74	-48.7118	-58.3774	-78.375	78.3358	33.1386	66.4133	-54.4969	7.06248	35.7031	15.6425	73.4809	70.4525	83.0856	11.0071	46.4995	3.18684	67.3738	-56.183	11.4259	-26.6095	-65.9726	32.1022	34.3676	3.70404	36.897			-66.1518	-24.8066	17.095	-19.4147	59.1389	60.946	-38.879	-90.5472	-60.039	72.2178	-23.4026	-21.8454	-19.9118	85.4106	-51.0614	-10.2174	-40.142	7.7628	49.631	75.0245	17.685	-74.4164
0.75	-50.0573	-58.4588	-78.2161	78.3944	33.6392	66.9737	-55.7329	7.34328	36.5617	15.2455	73.9367	72.3268	85.2671	11.0605	47.3006	3.51132	67.8024	-56.8362	9.44436	-27.6271	-67.2772	32.1072	35.7054	4.0608	37.085			-67.6955	-24.7186	16.865	-19.4707	60.6094	61.0854	-40.7024	-91.9423	-60.7104	73.735	-23.1848	-22.7423	-21.1608	86.4485	-51.7854	-10.2582	-40.6361	7.77228	49.9741	78.0014	18.347	-74.5912
0.76	-49.9514	-59.9857	-80.7541	80.13	34.6165	68.7594	-55.5332	7.57512	37.0264	15.2831	75.4505	73.1738	85.2268	10.8679	47.3636	3.01368	68.8729	-57.7042	8.76852	-27.3233	-67.1147	32.8808	35.476	3.49116	37.5968			-68.3456	-24.4688	18.0367	-20.5492	62.2379	62.234	-40.3285	-92.7372	-61.0631	73.9364	-23.916	-22.9645	-20.8108	88.0943	-52.2565	-11.4392	-42.2257	8.27784	50.2555	77.5416	17.8535	-75.63
0.77	-50.8728	-60.7578	-80.3022	80.7985	34.6481	69.1058	-56.9386	7.87824	38.402	14.622	75.2664	73.5937	87.4207	10.8572	49.0363	2.37408	69.2341	-58.2882	8.01084	-27.792	-68.8619	33.3694	37.1213	3.91296	37.4309			-68.746	-24.318	17.6956	-21.2219	61.9708	62.2465	-42.5012	-94.4924	-62.2348	74.8843	-23.5277	-23.4126	-22.125	89.7296	-54.2071	-12.5934	-42.4327	7.983	50.2445	78.6239	19.3172	-76.145
0.78	-51.471	-61.7994	-83.0534	81.8008	34.9914	71.0666	-56.9692	8.06244	38.7892	14.3215	77.3003	75.2668	87.5959	10.7965	48.9098	2.6088	70.5002	-59.1542	5.95968	-28.6261	-70.1929	34.0459	36.8108	3.37944	37.8328			-69.8208	-24.1204	18.755	-21.7165	63.3578	63.5996	-42.4462	-94.8788	-62.5523	75.0536	-24.4631	-24.1753	-22.0003	90.3844	-53.9074	-11.4541	-43.6862	8.72808	50.9226	81.0098	20.1128	-77.4062
0.79	-52.1189	-62.8296	-82.6364	82.8743	35.5724	71.1187	-57.5838	8.63196	39.6062	13.6818	76.923	75.0804	89.2661	10.7485	50.2984	3.08244	70.8037	-59.9239	6.50148	-28.902	-69.9319	34.3484	38.399	3.6072	37.8846			-69.8111	-24.0089	18.6364	-22.4734	64.0288	63.4781	-43.5872	-96.3678	-63.3878	76.4372	-24.2959	-24.084	-22.9051	92.8291	-56.0083	-11.4781	-43.8241	8.43204	50.7612	80.4317	19.6888	-77.8931
0.8	-53.4226	-63.7362	-84.9074	83.4868	35.3706	73.1909	-58.397	8.67024	40.6112	13.021	79.6948	77.3599	89.6032	10.7885	50.5115	3.13548	71.7733	-61.0651	3.80148	-29.495	-71.9518	34.8439	38.3556	3.26412	38.0908			-70.9787	-23.808	19.419	-22.7962	64.2402	64.8808	-44.5198	-96.3514	-64.2836	76.4986	-25.4131	-25.3454	-22.8451	92.9659	-55.9105	-12.684	-44.9326	9.25308	51.397	83.037	21.8124	-79.0326
0.81	-53.6526	-64.9236	-85.7167	84.8939	36.3342	73.2749	-58.5522	9.77124	40.7939	12.3714	79.5392	77.1715	91.201	10.542	51.2875	3.52752	71.987	-61.4084	4.14516	-29.7335	-71.9104	35.6114	39.9604	3.45492	38.4632			-71.35	-23.8009	19.6787	-23.6016	66.2351	64.8461	-44.6479	-98.9418	-64.5862	77.7131	-25.2074	-25.1213	-23.666	95.5387	-57.8087	-12.2621	-44.7216	8.84952	51.5542	82.6526	21.326	-80.6524
0.82	-55.3217	-65.7382	-86.3972	84.969	35.95	75.2267	-59.6798	9.53712	42.0739	11.4652	81.763	78.7692	91.8822	10.5876	51.6827	3.23604	73.6156	-62.8298	2.51844	-30.2539	-72.9131	35.534	39.8416	3.26088	38.67			-72.7838	-23.4078	19.8899	-23.7289	65.9238	66.4326	-46.3825	-98.7613	-65.8235	78.6192	-26.3329	-25.8688	-23.8842	95.0496	-57.8903	-11.9044	-46.3414	9.61008	51.8158	84.7615	22.4551	-80.7742
0.83	-55.2348	-66.7318	-88.0176	87.2784	37.1818	75.4216	-59.765	10.6771	42.5833	11.2444	82.0597	79.9086	93.169	10.8569	52.2977	2.988	73.7284	-63.192	1.09752	-30.6005	-74.2264	36.3598	41.3048	3.29076	38.884			-72.9215	-23.449	20.3975	-25.0079	68.3339	66.5401	-46.0273	-101.551	-66.503	79.0912	-26.2883	-26.348	-24.5693	97.697	-59.6272	-13.1966	-46.174	9.43896	52.223	85.1812	24.003	-82.1734
0.84	-57.2717	-67.7306	-88.1784	86.8939	37.408	76.7112	-61.1032	10.8805	42.9821	10.1399	83.1794	80.05	94.3412	10.3372	52.5672	3.1356	75.2099	-64.2394	1.27008	-30.968	-73.8156	36.3751	41.385	3.34044	39.3271			-75.0235	-23.1079	20.255	-24.5912	68.4062	68.257	-48.0013	-101.603	-66.9215	80.5684	-27.1211	-26.349	-24.8256	97.8296	-59.5237	-13.1014	-47.977	9.72024	52.2886	85.9078	23.5668	-82.7761
0.85	-57.1972	-69.1226	-90.488	88.9291	37.7518	77.2855	-60.8923	10.9169	43.3537	9.84708	84.2658	82.0982	95.3383	10.9358	53.2604	3.16896	75.3416	-64.9858	-1.4448	-31.2826	-75.5546	36.8609	42.6719	3.26892	39.4867			-74.7412	-22.7516	21.2275	-26.1742	69.3287	68.92	-47.7377	-103.004	-68.8345	81.0094	-27.3791	-27.4685	-25.443	98.6124	-61.4531	-11.708	-47.8588	9.80604	52.8847	87.4265	25.2512	-83.6898
0.86	-58.5031	-69.5266	-90.2396	89.1055	38.2063	78.3956	-62.2019	11.652	43.4616	9.27948	84.3971	81.8352	96.7652	10.8361	53.5566	3.17184	76.551	-65.8898	-0.71988	-31.7899	-75.5946	36.7739	42.5983	3.41868	39.6043			-76.6366	-22.641	20.8156	-25.9484	70.72	70.4746	-49.4038	-104.597	-69.2479	81.8543	-27.7586	-26.9777	-25.6842	100.194	-61.1882	-12.9152	-49.4548	9.88968	52.9639	87.6884	25.8685	-84.1292
0.87	-58.8026	-71.2391	-92.3396	90.5039	38.6087	78.8809	-62.4152	11.5157	43.8497	8.50248	85.9468	83.9581	97.473	11.1779	54.2812	2.78064	76.7654	-66.5402	-2.95848	-31.9945	-76.1809	37.6606	44.1563	3.29304	40.714			-76.6951	-22.1582	21.8629	-27.2188	70.8013	71.204	-49.3598	-104.617	-70.7327	82.7382	-28.3204	-28.1395	-26.1467	100.302	-63.1536	-13.3883	-49.5518	10.0772	53.143	89.422	26.0358	-85.8202
0.88	-59.4568	-71.2636	-92.1158	91.0471	38.5633	79.7302	-63.0779	12.2855	44.1923	8.34828	85.7404	83.9932	99.0494	11.1527	54.6524	2.92332	78.0998	-67.368	-4.05684	-32.502	-76.8623	37.3925	44.0992	3.61596	40.729			-77.8178	-22.3369	21.6095	-27.2683	71.7386	72.6136	-50.1484	-106.976	-71.9574	83.1275	-28.6148	-27.9724	-26.3857	102.464	-62.9406	-11.5789	-51.2008	9.8274	53.4756	89.4378	26.6918	-85.749
0.89	-59.8615	-73.2792	-94.7206	91.7479	39.1765	80.5027	-63.645	12.184	44.4346	7.39896	87.8566	85.463	99.6888	11.3426	55.3663	3.38556	78.0841	-67.8662	-4.09356	-32.4902	-77.0779	38.5486	45.6624	3.75216	42.2299			-78.2342	-21.5192	22.6396	-28.2698	72.9584	73.7689	-51.0349	-107.033	-72.7687	84.2833	-29.3336	-28.7692	-26.7413	102.224	-65.0222	-12.5804	-51.2651	10.2512	53.5494	91.2526	27.126	-88.1575
0.9	-60.6599	-73.1585	-95.0843	92.8092	38.9653	81.0442	-64.1016	13.3716	44.7944	7.00872	87.677	86.1448	101.507	10.9919	55.6272	3.51828	79.7015	-68.8534	-6.29988	-32.8337	-77.8225	38.9807	45.7663	3.94164	42.4313			-79.2679	-21.7884	22.5822	-28.639	72.8818	74.8277	-51.0534	-109.611	-74.03	84.6546	-29.5235	-28.946	-26.9522	105.077	-64.6991	-13.2786	-53.141	9.82812	53.4743	91.3271	27.4256	-88.9025
0.91	-61.085	-75.2248	-96.444	92.7136	39.8772	81.8454	-65.2931	13.3117	44.8286	6.49044	90.0298	87.0144	101.951	11.0872	56.3866	3.3378	79.4525	-69.6347	-5.82672	-33.2753	-78.5992	39.0925	46.7034	3.91344	43.0102			-79.9063	-21.1334	23.0358	-29.1593	75.5407	76.282	-52.5274	-109.655	-74.5798	85.4092	-30.2971	-29.3882	-27.3376	104.656	-66.7873	-11.8424	-53.1546	10.2184	53.8834	93.3589	28.648	-89.7923
0.92	-61.9739	-75.2936	-97.7435	93.9439	39.6958	82.2042	-65.2555	14.6298	45.3624	5.5884	89.7065	88.4573	103.864	10.4993	56.6808	2.69028	80.7587	-70.2163	-7.878	-33.2342	-78.483	39.813	46.7634	4.2624	43.5106			-81.0227	-21.3604	23.6861	-29.7941	74.9651	77.2032	-52.1628	-111.817	-75.9278	86.6437	-30.2334	-30.2809	-27.3401	107.29	-66.5713	-12.5929	-54.1754	9.64752	53.5169	93.0601	28.0973	-91.1663
0.93	-62.5834	-76.7722	-98.4761	93.8936	40.363	83.2134	-66.9517	14.8164	45.4661	5.40516	92.0518	88.4226	104.031	10.5203	57.472	1.13244	80.8375	-71.339	-7.97376	-34.0158	-80.2832	39.8183	47.7584	4.15008	44.6365			-81.8592	-20.7296	23.6975	-30.2761	77.0016	78.8976	-54.1856	-111.759	-76.8066	86.9426	-31.2613	-29.9916	-27.721	106.847	-68.609	-13.541	-54.1745	9.91416	53.8258	95.6004	29.9293	-91.6052
0.94	-63.2164	-76.8394	-99.92	95.088	40.7399	83.3167	-66.6283	15.5382	45.6505	4.60032	91.6358	90.6629	106.072	9.28956	57.5514	0.93708	82.7797	-71.8082	-8.64456	-34.05	-80.5596	40.6084	47.9207	4.62204	44.7626			-82.7441	-21.0468	24.357	-31.346	78.0083	79.2487	-53.6828	-113.381	-77.7349	88.2282	-31.1732	-31.3717	-27.7648	108.988	-68.2668	-13.4855	-55.5349	9.3012	53.8337	96.2234	30.2611	-93.0233
0.95	-64.0808	-78.4578	-100.399	95.1563	40.7905	84.6461	-68.2669	15.8069	46.2031	4.13124	94.099	90.2749	105.991	8.91336	58.7016	2.49	82.5409	-72.7573	-10.3931	-34.5382	-80.7334	40.2266	48.5976	4.62852	46.2786			-83.827	-20.4768	24.3306	-31.5655	78.0896	81.3277	-55.7082	-113.843	-79.287	89.0476	-32.0392	-31.0632	-28.0625	109.497	-70.3572	-14.2822	-55.4039	9.585	53.3038	97.3525	30.3942	-93.3152
0.96	-64.4617	-78.3854	-102.007	96.7426	41.71	84.5376	-68.5019	16.5348	46.33	3.90588	93.794	92.1251	108.279	8.16348	58.7016	2.70768	84.9452	-73.3132	-9.88116	-34.841	-82.3993	41.1874	48.8224	4.74888	46.4584			-84.4331	-20.7538	24.8008	-32.9132	80.848	81.3743	-55.9805	-115.304	-79.7976	89.5266	-31.8354	-32.0332	-28.1382	110.181	-70.1742	-14.616	-56.5714	9.033	53.7985	98.7672	31.7452	-95.008
0.97	-65.6654	-80.2962	-102.341	96.6556	41.4612	86.2172	-68.9008	16.3313	46.7275	3.06216	95.8367	93.056	108.161	7.656	59.8388	2.05176	84.7921	-74.4431	-12.1357	-34.8052	-82.2754	41.4011	49.4806	4.86276	47.5452			-85.9025	-20.1889	25.0102	-33.0355	80.529	83.5987	-56.4576	-115.376	-80.9978	90.8328	-32.6772	-32.4694	-28.4473	111.415	-72.1687	-14.1061	-56.5502	8.91564	53.645	99.0956	31.9064	-95.5048
0.98	-65.9525	-80.1892	-104.539	98.4156	42.3768	86.0494	-70.4411	17.783	47.4692	2.72928	96.7237	93.0077	110.547	7.29228	59.8399	1.08996	87.1664	-74.9058	-12.6094	-35.6585	-82.5887	41.8448	49.6637	4.842	47.917			-86.1035	-20.4715	25.3684	-34.5673	82.0188	83.5522	-58.5491	-117.776	-82.4908	91.2799	-32.7746	-32.432	-28.4676	111.367	-72.0698	-14.6126	-57.7802	8.50836	53.4307	100.786	32.339	-96.3869
0.99	-66.9853	-82.3465	-104.321	98.4314	42.3365	87.6205	-70.2265	17.7739	47.5505	2.19228	97.0404	95.3322	110.371	6.73296	61.1017	-0.11796	87.1072	-75.5458	-12.4639	-35.1792	-83.595	42.9175	50.4636	4.92072	48.9904			-87.5326	-19.9195	25.4778	-34.6277	83.0305	85.6768	-58.0548	-117.613	-82.8426	92.026	-32.9423	-33.8086	-28.8256	113.529	-73.8629	-15.0796	-57.6239	8.37624	54.2864	100.956	32.7958	-98.0035
1	-67.2614	-82.3373	-106.855	100.242	42.6955	87.4937	-71.2847	19.0865	48.2618	1.05372	98.6077	94.9864	112.61	6.32664	61.0205	0.6066	89.1335	-77.0316	-14.3741	-36.3038	-83.9917	42.9912	50.5288	4.83948	49.2072			-87.5922	-20.1199	26.0024	-36.6157	83.2294	85.7508	-60.2918	-119.896	-84.3779	93.2537	-33.4744	-33.3913	-28.8748	113.239	-73.9183	-13.7881	-59.0404	8.17932	54.7097	102.978	33.5942	-98.0202
1.01	-68.0867	-84.1636	-106.332	99.9859	42.8374	89.052	-71.4508	19.43	48.6962	0.9072	98.6088	96.1226	112.866	5.55228	62.2775	0.39324	89.3567	-77.3396	-14.2001	-35.7604	-84.0523	43.4863	51.263	4.90632	50.8674			-88.9898	-19.9192	25.9649	-36.2275	84.1814	87.5509	-60.2233	-120.257	-85.3438	93.5557	-33.5822	-34.5004	-29.1738	115.848	-75.4122	-14.4436	-58.8568	7.74144	54.3724	102.824	33.4382	-99.233
1.02	-68.4526	-84.1942	-109.104	101.834	43.2643	89.2316	-71.7071	19.853	48.9473	-0.23868	100.435	96.9253	114.729	5.00712	62.3821	0.1386	90.3881	-78.4804	-16.8737	-36.6971	-85.5055	43.6416	51.541	4.90404	51.1054			-89.3549	-19.9046	26.766	-38.4982	85.0157	87.9174	-60.9895	-121.316	-85.9474	94.7459	-34.2148	-35.2391	-29.1504	115.839	-75.9725	-14.9096	-60.2711	7.94148	54.6016	104.918	34.5384	-99.7544
1.03	-69.5041	-85.8613	-108.91	101.687	43.4222	90.625	-72.5078	20.6203	49.812	-0.79152	100.384	97.1839	115.36	4.7064	63.5267	0.7152	91.221	-78.865	-16.923	-36.3751	-85.4362	44.2946	51.8908	4.84332	52.5648			-91.3111	-20.3651	26.6188	-38.2534	85.634	89.5248	-62.7007	-122.454	-87.6925	95.4421	-34.2494	-35.311	-29.4926	117.927	-76.9619	-13.8217	-60.5219	7.49832	54.8814	104.975	34.89	-101.212
1.04	-69.7404	-85.8492	-110.642	103.125	43.6302	90.8353	-72.1734	20.9392	50.0252	-1.245	102.347	99.1465	116.968	4.28148	63.9869	0.31236	91.4885	-79.8283	-17.3252	-36.8888	-87.289	44.3213	52.227	4.69284	52.7194			-91.437	-20.2591	27.295	-40.1215	87.3668	89.8267	-62.1896	-123.328	-88.2146	95.9716	-34.9511	-36.3637	-29.5537	118.726	-77.845	-13.9996	-61.1836	7.55772	54.2716	106.521	35.5841	-101.556
1.05	-71.018	-87.6726	-111.732	103.563	43.8342	92.4053	-73.1743	21.8112	50.6285	-2.4036	102.012	98.9184	117.717	4.1226	64.855	-0.52104	92.2606	-80.725	-19.9919	-37.004	-87.2093	45.1961	52.5757	4.88952	53.8284			-93.4026	-20.5423	27.7651	-40.7302	87.1934	91.4957	-63.8857	-124.696	-89.5216	97.2466	-34.9547	-36.5059	-29.9281	119.642	-78.7031	-14.4068	-62.0981	7.53468	53.6926	107.46	35.7397	-103.563
1.06	-71.1649	-88.4641	-112.054	104.023	43.8496	92.8667	-72.9176	22.294	51.4492	-2.63988	104.518	100.994	119.477	3.79068	65.7469	0.36984	93.0006	-80.1494	-19.543	-36.9748	-88.5419	45.4945	52.9192	4.67256	54.1552			-93.6997	-20.5484	28.0134	-41.5042	89.7934	91.9165	-63.9802	-125.916	-90.9086	97.4088	-35.6701	-37.3417	-30.2016	121.741	-79.7756	-13.4682	-62.9615	7.58064	54.3236	108.144	36.2279	-104.088
1.07	-72.1511	-89.541	-114.179	104.923	44.171	94.1207	-73.9074	22.8332	51.6373	-3.73476	104.417	100.902	120.03	3.81276	66.4074	0.26424	93.7476	-82.2119	-21.3721	-37.5492	-89.2022	45.9601	53.2537	4.7202	55.7881			-95.2502	-20.5486	28.841	-43.0032	89.1617	93.1794	-65.4539	-127.367	-91.3266	98.6094	-35.5859	-37.4875	-30.3208	121.4	-80.2325	-13.7646	-63.7171	6.97932	52.9078	109.891	36.401	-105.144
1.08	-72.6439	-91.0492	-113.733	105.103	44.2008	95.0604	-73.8115	23.3088	52.454	-4.34364	106.4	102.42	121.964	3.28368	67.1347	-1.10652	94.5568	-82.6236	-22.3427	-37.1958	-89.3776	46.7113	53.6105	4.80108	56.0066			-96.066	-20.4804	28.7144	-43.1382	91.363	94.0637	-65.8321	-128.431	-92.7553	99.8149	-36.0152	-38.0824	-30.7518	124.462	-81.069	-14.3827	-64.7923	7.53972	53.0969	109.806	36.5636	-106.866
1.09	-73.3536	-91.2605	-116.245	106.204	44.3099	95.9291	-74.119	23.7018	53.2142	-4.80468	107.166	103.19	122.356	3.45984	67.9418	-0.94176	95.472	-83.4487	-22.6692	-38.1342	-91.8946	47.0136	53.8964	4.81704	57.5371			-97.1928	-20.4995	29.5657	-45.3286	92.8424	94.756	-66.536	-130.026	-93.8504	100.173	-36.4987	-38.5618	-30.8146	124.112	-81.7535	-13.8739	-65.7577	6.77904	52.8763	112.314	37.2344	-106.855
1.1	-73.8821	-93.606	-115.522	106.192	44.4313	97.3519	-74.6699	24.2342	53.5645	-5.60388	107.844	103.776	124.288	2.74128	68.5422	-0.3984	95.9436	-84.0853	-24.0827	-37.5788	-91.3054	47.4446	54.2083	5.02656	57.86			-98.2142	-20.3056	29.5136	-45.0942	92.661	95.8544	-67.3116	-130.539	-94.3976	101.573	-36.5828	-38.7977	-31.3129	126.554	-82.4004	-13.5697	-66.4139	7.2468	51.8012	111.882	37.136	-108.4
1.11	-74.4618	-93.328	-118.47	107.253	44.559	97.9795	-74.6474	24.7418	54.623	-5.99256	110.522	105.623	124.679	3.177	69.4126	-1.47552	96.8782	-85.0232	-24.3268	-38.1113	-92.806	47.8019	54.5023	4.95924	59.1254			-99.2251	-20.1976	29.6234	-47.1486	95.4215	96.2255	-67.8746	-132.18	-96.0047	101.883	-36.6406	-39.6604	-31.3909	126.889	-82.992	-14.5693	-67.6319	6.59244	52.3296	114.138	37.6052	-108.211
1.12	-75.1453	-95.6624	-118.658	106.945	44.3682	99.9329	-75.4348	25.1396	54.8846	-6.582	109.521	105.236	126.495	2.37072	70.1287	-2.33676	97.1702	-85.6783	-24.921	-37.9232	-94.5241	48.4655	54.9149	5.10252	59.4818			-100.444	-20.1748	30.1474	-46.5144	94.9276	97.342	-69.1417	-132.261	-96.3847	102.791	-37.2078	-39.7171	-31.9306	127.792	-83.8145	-14.8144	-68.2691	6.89652	51.3602	114.426	38.2396	-110.41
1.13	-75.5574	-95.3731	-119.385	108.222	44.705	100.142	-75.1254	25.981	55.6583	-6.95148	113.099	107.622	126.797	2.45904	70.7651	-1.18212	97.9388	-86.4494	-26.2147	-38.1053	-93.8212	48.682	55.1729	5.0268	60.9109			-101.047	-19.9901	29.684	-49.08	96.8263	97.44	-69.1571	-134.293	-97.4267	103.31	-37.9735	-40.7107	-31.9762	129.298	-84.379	-13.922	-69.1535	6.41592	51.354	115.365	38.0874	-110.966
1.14	-76.7342	-97.3198	-121.693	108.232	44.9785	102.269	-76.014	26.2146	56.5168	-7.55196	113.372	107.067	128.711	2.1048	71.2153	-1.86084	97.796	-86.8982	-26.0381	-38.9461	-96.4672	49.1884	55.5412	4.99668	61.3606			-102.943	-20.0641	29.6238	-48.6953	98.3648	98.5513	-71.1961	-134.029	-98.8396	103.826	-37.5559	-40.6008	-32.7702	129.048	-84.8398	-14.5724	-69.637	6.79536	50.7727	117.626	38.84	-111.49
1.15	-76.8816	-97.1537	-121.172	109.086	44.6003	102.502	-75.6486	27.24	56.7695	-8.48964	115.754	109.18	128.816	1.47108	72.2639	-3.25668	98.7287	-87.7297	-27.8394	-38.6178	-96.5779	49.6529	55.7815	4.9626	62.8553			-103.04	-19.7243	29.8787	-50.6075	98.3294	98.5633	-70.7566	-136.824	-99.014	105.006	-37.4963	-41.8314	-32.6747	131.601	-85.6408	-14.699	-70.7742	6.28716	50.593	117.571	38.9254	-113.328
1.16	-78.0356	-98.9167	-123.262	109.47	45.2826	104.706	-76.3772	27.2208	58.1915	-8.90436	115.994	109.826	130.652	1.46364	72.9469	-3.60012	98.7484	-88.0032	-27.5069	-38.9526	-97.2331	49.9619	56.2055	5.10576	63.4568			-104.93	-20.0328	29.0165	-50.9712	99.6204	99.7159	-73.1532	-136.395	-100.612	105.396	-37.2922	-42.09	-33.6482	131.069	-86.1628	-14.595	-71.1944	6.99096	50.244	119.063	39.1109	-113.622
1.17	-78.0734	-99.1056	-123.43	109.861	45.3313	104.886	-76.2902	28.2414	58.6409	-9.56568	117.552	110.225	130.924	0.27276	73.7423	-1.61868	99.7788	-89.1769	-29.0226	-39.2749	-99.2118	50.3849	56.3618	4.82988	64.5144			-104.928	-19.6954	29.4313	-51.9572	100.396	99.6506	-73.1764	-139.12	-101.019	106.207	-38.0063	-42.3854	-33.5018	134.175	-86.9094	-14.9011	-72.7876	7.0248	50.9263	119.322	39.621	-114.943
1.18	-79.4288	-100.475	-125.207	110.691	45.6572	106.862	-76.0156	28.1027	59.3116	-10.5356	117.895	111.985	132.544	0.57804	74.7432	-2.30112	99.6024	-89.6165	-30.4144	-39.1075	-98.3831	50.7577	56.8631	4.48776	64.9186			-107.073	-19.7902	28.8043	-53.8358	100.79	100.921	-74.3104	-138.844	-101.812	107.658	-38.1169	-43.5596	-34.4677	133.989	-87.6395	-15.5814	-72.9308	7.11972	50.6537	120.937	39.5771	-115.086
1.19	-79.4446	-100.923	-125.621	110.644	46.1118	107.206	-76.3856	29.2168	60.26	-10.721	118.79	111.564	132.926	-0.48864	75.1567	-3.6126	100.694	-90.0977	-30.0775	-39.5914	-100.497	51.3029	56.8817	4.67676	65.947			-106.993	-19.7296	28.9067	-53.7377	102.734	100.982	-76.3088	-141.601	-103.166	107.83	-39.386	-43.5685	-34.4642	136.172	-88.04	-15.4007	-75.5449	8.25276	50.8992	121.339	39.955	-116.853
1.2	-80.8708	-101.678	-127.16	111.472	45.9994	108.759	-76.0259	29.0321	60.5137	-11.6284	120.01	113.779	134.628	-0.69468	76.1497	-4.93704	100.714	-91.0228	-32.7338	-39.3743	-101.256	51.6116	57.5741	4.203	66.3395			-109.088	-19.4474	28.4144	-56.6084	102.464	102.218	-75.7294	-141.638	-103.572	109.086	-39.9662	-44.8914	-35.4433	136.543	-88.8103	-15.0895	-75.2753	8.025	51.2843	122.732	40.2437	-117.1
1.21	-80.7674	-103.042	-127.45	111.27	46.6732	109.564	-75.67	29.9232	61.3423	-12.2788	120.331	113.272	134.907	-1.0368	76.7662	-5.13312	101.739	-91.1282	-32.5688	-39.7752	-101.554	52.102	57.4793	4.0362	67.6286			-108.813	-19.4939	28.3541	-55.9662	105.23	102.816	-77.8912	-143.304	-104.7	109.911	-40.1183	-44.7564	-35.356	138.327	-89.473	-14.9341	-78.2832	9.03768	51.3836	123.142	40.3038	-118.933
1.22	-82.484	-103.299	-128.756	111.892	46.7323	110.493	-75.7722	30.028	62.059	-12.7493	122.148	115.374	136.605	-1.55904	77.5421	-4.59732	101.521	-92.2085	-33.8689	-39.738	-103.671	52.3787	58.3862	3.84696	68.6156			-111.111	-18.9923	27.8905	-58.9115	105.099	103.524	-78.0893	-144.201	-105.829	110.393	-41.9317	-46.0234	-36.4877	139.04	-90.0158	-14.8008	-78.1858	9.01836	51.8956	124.45	40.7957	-119.768
1.23	-82.2127	-104.808	-129.162	112.174	46.6934	111.774	-75.3932	30.5234	62.3605	-13.575	121.91	115.723	137.004	-1.34556	78.1298	-3.93876	102.727	-92.6209	-35.166	-40.0652	-103.192	52.6408	58.1812	3.45828	69.5044			-110.741	-19.0145	27.6701	-58.8868	106.537	104.731	-79.2742	-144.687	-106.154	111.872	-41.84	-46.3128	-36.4866	139.901	-90.9337	-14.2944	-80.2536	9.32004	51.7726	125.141	40.8642	-120.921
1.24	-84.088	-104.29	-130.316	112.384	47.3026	112.229	-75.4186	31.2007	63.2816	-13.9123	124.273	116.547	138.262	-2.00424	79.1495	-4.77432	102.688	-93.442	-35.2385	-40.0994	-105.402	52.9889	59.2984	3.29844	70.7783			-113.07	-18.272	27.3125	-60.575	107.69	104.985	-80.1716	-146.573	-107.883	112.333	-43.9638	-46.7807	-37.4162	140.974	-91.7437	-14.8702	-80.6958	9.26832	52.0981	126.009	41.3603	-122.31
1.25	-83.946	-105.915	-131.006	112.59	47.0743	113.724	-75.2522	31.2907	63.5761	-14.4982	123.787	118.143	138.974	-1.53408	79.4833	-4.40712	103.292	-94.0385	-36.478	-40.3171	-106.06	53.0689	59.0182	3.03516	71.4918			-112.968	-17.6542	26.889	-62.5213	107.957	106.613	-80.7508	-146.998	-108.442	113.382	-43.4456	-47.7204	-37.507	141.405	-92.219	-15.1741	-81.4735	9.4836	51.9982	126.986	41.52	-123.026
1.26	-85.5743	-105.529	-131.526	112.543	47.4572	113.935	-75.136	32.387	63.8962	-15.4492	125.353	117.764	139.795	-2.26572	81.0706	-3.96636	103.618	-94.8373	-37.3115	-40.5386	-106.303	53.5832	60.1374	2.76276	72.1559			-115.019	-17.6281	26.6898	-62.6093	109.243	106.582	-82.9105	-149.463	-109.313	114.862	-45.6544	-47.6738	-37.9838	142.902	-94.1195	-14.5146	-82.0316	9.52308	52.3829	127.881	41.6886	-124.708
1.27	-85.5306	-107.485	-132.919	112.979	47.3092	115.755	-75.0793	32.339	64.62	-15.7094	125.636	120.099	140.916	-1.8252	81.1063	-4.81044	104.235	-95.4204	-37.8942	-40.5054	-108.846	53.3971	60.0734	2.63196	72.9839			-114.837	-16.5007	26.2604	-65.167	109.772	108.523	-82.7573	-149.428	-110.893	115.276	-45.6631	-48.7976	-38.3254	143.046	-93.9707	-14.658	-83.3467	9.6786	52.4219	128.971	42.1583	-124.892
1.28	-86.7832	-107.268	-133.136	112.893	47.3926	115.757	-74.9328	32.9976	64.7502	-16.5415	126.558	119.811	141.431	-3.00636	82.3648	-4.16832	104.651	-96.2528	-39.425	-40.9249	-108.273	54.0371	60.9514	2.55432	73.6097			-116.98	-16.6147	25.951	-64.7023	110.678	108.341	-84.9916	-151.837	-111.413	116.617	-47.0568	-48.6529	-38.6905	145.511	-95.932	-14.3298	-83.8302	9.81192	52.5492	129.473	42.1206	-126.14
1.29	-87.0067	-109.096	-134.609	113.421	47.7037	117.469	-75.1084	33.1026	65.0753	-17.2644	127.172	121.587	143.367	-2.78736	82.5523	-3.63348	105.547	-97.1718	-39.3334	-40.8818	-109.535	54.1295	60.9379	2.52792	74.3842			-116.949	-15.5132	25.8347	-67.572	112.859	110.598	-84.5586	-152.012	-112.512	117.572	-47.7764	-49.8922	-39.1475	145.277	-95.808	-14.1155	-85.532	9.95172	52.8646	131.178	42.0062	-126.788
1.3	-88.0375	-109.112	-134.649	113.254	47.7683	117.493	-74.8159	33.3985	65.4581	-17.5273	127.744	122.238	143.378	-3.80988	83.4408	-4.96032	105.77	-97.9967	-41.7827	-41.3849	-110.87	54.6431	61.731	2.38872	75.3545			-118.744	-15.661	25.5538	-67.0763	112.303	110.361	-86.3231	-153.481	-113.845	117.867	-48.8192	-50.1558	-39.1412	147.603	-97.51	-14.6777	-86.0766	10.1989	52.4224	131.401	42.3977	-128.149
1.31	-88.5361	-110.793	-136.653	113.805	47.9867	119.24	-74.9593	33.291	65.5783	-18.5309	128.785	122.863	145.634	-3.78348	83.6626	-4.5768	106.587	-98.8681	-41.7386	-41.2393	-111.086	54.7132	61.8006	2.63124	75.8395			-119.24	-14.5562	25.1736	-69.4182	114.979	112.793	-86.5129	-153.997	-114.33	119.454	-49.9745	-50.5099	-39.5246	147.822	-97.6268	-14.5118	-87.5131	10.3668	52.7282	132.918	42.2464	-128.768
1.32	-88.8745	-110.862	-136.204	113.95	48.5159	119.393	-74.8348	33.9379	65.9177	-19.1232	129.03	124.946	145.585	-4.8618	84.4127	-3.70956	107.078	-99.8201	-43.3957	-41.8051	-112.167	55.2299	62.5654	2.1828	76.7803			-120.302	-14.7578	25.2756	-69.6989	115.235	112.919	-87.4063	-156.122	-115.883	120.227	-50.558	-51.5344	-39.7465	149.676	-99.0088	-14.1569	-88.3051	10.707	52.5366	132.662	42.4855	-129.973
1.33	-89.8919	-112.341	-138.064	114.273	48.1487	120.856	-74.5901	33.7242	66.0241	-19.47	129.79	124.556	148.1	-4.8816	84.7614	-5.21424	107.535	-100.556	-44.3578	-41.859	-113.279	55.5202	62.9479	2.58672	77.3944			-121.488	-13.6292	24.4894	-71.0872	115.866	114.846	-88.5586	-156.051	-117.181	120.936	-51.5569	-51.3682	-39.858	149.877	-99.267	-14.3495	-89.1311	10.663	52.4257	134.607	42.4462	-131.307
1.34	-89.8044	-112.671	-137.732	114.501	48.6974	121.191	-74.8416	34.4368	66.1579	-20.7985	129.915	127.196	148.058	-5.83032	85.5442	-4.80132	108.34	-101.603	-44.6964	-42.2176	-113.155	55.4536	63.614	2.25396	77.9726			-121.794	-13.6492	24.3169	-72.3952	117.33	115.076	-88.8234	-158.565	-117.822	122.794	-52.0734	-52.4396	-40.0259	151.346	-100.404	-13.8162	-90.66	11.213	52.5703	134.112	42.2248	-131.423
1.35	-90.8182	-113.974	-138.196	114.625	48.2779	122.518	-74.4548	34.3667	66.3521	-21.0124	130.697	126.924	150.931	-6.65556	85.9232	-4.36284	108.691	-102.344	-47.0977	-42.7708	-115.629	56.7202	64.0762	2.15148	78.4398			-123.447	-12.5539	23.6831	-72.9226	117.242	116.59	-90.4435	-158.486	-119.836	123.058	-52.6591	-52.3212	-39.9409	152.195	-100.603	-14.1088	-91.3048	11.1296	52.0495	136.096	42.7709	-134.32
1.36	-90.5704	-114.227	-139.433	115.109	48.7943	123.154	-74.755	35.0099	66.3256	-22.0313	130.648	128.617	150.598	-6.32004	86.6651	-5.37672	109.289	-103.597	-46.5334	-42.8558	-115.31	56.5188	65.0252	2.0976	79.8186			-123.368	-12.6074	23.0558	-75.1217	119.318	117.244	-90.2587	-160.929	-119.881	124.747	-53.2962	-52.8331	-40.0986	152.688	-101.645	-14.6107	-92.7692	11.7152	52.4275	136.252	42.2938	-133.763
1.37	-91.7406	-115.479	-139.12	114.998	48.8162	124.185	-74.1524	34.9807	66.6344	-22.5346	131.838	130.2	153.496	-7.64772	87.1801	-4.54272	109.537	-104.075	-48.818	-43.8294	-117.21	57.3424	65.4266	1.75164	80.2188			-125.76	-11.6542	23.2175	-74.6611	119.67	118.542	-92.2691	-160.908	-121.842	125.346	-54.6755	-53.4378	-40.0979	155	-102.249	-13.7359	-93.3421	11.477	51.7627	136.14	42.9556	-136.598
1.38	-91.5728	-115.896	-141.569	115.883	49.0705	125.043	-74.4654	35.6396	66.8095	-22.9604	131.546	129.937	153.205	-7.85472	87.6619	-5.35824	110.108	-105.815	-49.0974	-44.2204	-118.846	57.6174	66.9929	1.64712	81.4295			-125.594	-11.5318	22.4447	-77.6126	121.192	119.337	-92.1934	-163.263	-122.812	126.12	-54.9107	-53.2704	-40.2001	154.673	-102.884	-13.5037	-94.7983	12.1658	51.8704	137.489	43.383	-136.349
1.39	-92.6616	-116.895	-140.601	115.688	49.5589	125.853	-74.1245	35.6472	66.8773	-24.1946	132.874	132.594	155.525	-7.82448	88.2626	-6.96336	110.302	-105.932	-50.2837	-44.4589	-118.286	57.532	67.3496	1.52304	81.8646			-128.015	-11.0062	22.3766	-76.8974	122.829	120.126	-93.4571	-163.497	-123.337	127.58	-56.52	-54.0049	-40.2239	156.11	-103.725	-13.2995	-94.9348	11.7182	51.6589	137.381	43.2515	-138.116
1.4	-92.5218	-117.494	-141.327	116.344	49.698	127.122	-74.1556	36.3805	67.4202	-24.2466	132.483	132.182	155.319	-8.5374	88.7004	-5.69532	111.031	-107.841	-51.9293	-45.8426	-121.062	58.2077	68.888	1.03356	82.7544			-127.912	-10.7119	23.6279	-78.9277	122.505	121.294	-93.865	-165.975	-125.157	127.749	-56.4359	-53.9442	-40.4378	156.863	-104.226	-13.2524	-96.4943	12.465	51.2044	138.899	43.6087	-138.861
1.41	-93.7198	-118.374	-141.86	116.842	49.6178	127.569	-74.3225	36.5238	67.689	-25.4347	134.135	134.063	157.838	-8.63256	89.5805	-6.00444	111.245	-107.82	-51.5062	-45.8375	-120.887	57.7871	69.8274	1.13508	83.7349			-129.945	-10.383	23.1733	-80.6806	124.406	121.756	-94.6678	-166.139	-125.735	129.08	-58.4657	-54.4831	-40.2623	157.489	-105.149	-14.492	-96.4993	12.0034	51.5968	139.15	43.8673	-139.403
1.42	-93.9408	-118.998	-142.838	117.015	49.8804	129.134	-73.9787	36.809	67.9955	-26.3165	133.853	135.088	157.657	-9.90372	89.9317	-7.25172	112.237	-109.521	-54.2629	-47.3089	-122.288	58.4744	71.1344	0.924	84.8081			-130.41	-10.0255	24.4579	-80.5909	125.026	123.194	-95.5979	-168.181	-126.791	129.932	-58.4846	-54.7336	-40.5763	159.16	-105.291	-14.7413	-98.7671	12.6174	50.6881	140.336	43.6387	-141.201
1.43	-94.9157	-120.012	-143.543	117.686	49.6865	129.335	-74.4085	36.8939	68.7636	-26.76	135.388	135.311	159.909	-9.84912	90.9103	-6.0018	112.157	-109.706	-54.0436	-47.134	-123.345	57.9956	72.1661	0.60912	85.3694			-131.519	-9.72948	24.3398	-83.0032	125.443	123.484	-95.9784	-169.184	-128.364	130.349	-60.4129	-54.657	-40.3658	159.171	-106.337	-14.1078	-98.4834	12.2977	50.7694	140.882	43.858	-141.148
1.44	-95.6242	-120.832	-144.245	117.803	49.8395	131.007	-74.1353	37.4266	68.7814	-28.0598	135.136	137.666	160.031	-11.6279	91.1791	-5.78292	113.502	-111.455	-55.3859	-48.5471	-123.576	59.0802	73.4729	0.71388	87.1364			-132.755	-9.22464	24.9594	-82.8403	127.108	124.981	-98.404	-170.505	-128.552	131.923	-60.3272	-55.4533	-40.5643	161.458	-106.511	-14.0897	-101.161	12.6752	50.4648	141.954	43.9909	-143.235
1.45	-96.1172	-121.654	-146.437	118.035	49.7682	131.037	-74.1502	37.5722	69.3706	-28.4276	136.575	137.173	162.005	-11.2532	92.3388	-6.74364	113.27	-111.576	-57.5873	-48.2963	-124.649	58.6296	73.7743	0.60372	87.2866			-133.043	-9.1026	25.4382	-84.2329	127.155	125.103	-97.5816	-171.621	-130.138	132.381	-62.3621	-55.1346	-40.3838	160.927	-107.267	-14.4755	-100.706	12.452	49.6232	142.368	43.7045	-143.048
1.46	-96.6	-122.491	-145.346	118.458	49.4665	132.854	-74.2031	37.9019	69.8213	-29.1709	136.332	139.579	162.511	-12.9984	92.5796	-5.41512	114.754	-113.389	-57.1013	-49.4386	-125.853	59.9345	75.1612	0.54264	88.4822			-134.34	-8.5044	25.1222	-84.7514	129.755	126.649	-99.5776	-172.134	-131.032	133.276	-62.3057	-56.0261	-40.5599	163.654	-107.575	-13.9849	-103.367	12.5465	49.8322	143.204	44.0591	-145.525
1.47	-96.9848	-123.269	-146.522	118.545	49.5725	132.828	-74.0771	38.1613	69.936	-29.8742	137.507	139.365	163.889	-13.0549	94.1473	-6.35472	114.559	-113.572	-59.9309	-49.3926	-125.726	59.5237	75.7619	0.65184	89.057			-134.494	-8.63028	26.7289	-85.9018	129.305	126.695	-101.073	-173.677	-131.55	134.469	-63.9733	-55.7288	-40.4578	163.402	-108.165	-13.5378	-103.154	12.5346	48.7595	143.935	43.7156	-145.201
1.48	-97.7948	-124.619	-148.443	118.985	49.304	134.669	-74.2976	38.3312	70.9748	-30.3341	137.513	140.903	165.035	-14.0812	94.1347	-7.9416	116.13	-115.45	-59.631	-50.434	-128.431	61.1482	76.7172	0.43896	90.2329			-136.331	-8.00652	27.3445	-86.4672	131.759	128.211	-100.709	-173.884	-133.125	134.826	-64.1071	-56.3098	-40.4912	165.468	-108.39	-12.5916	-105.364	12.4178	48.9346	144.8	43.9126	-147.605
1.49	-98.105	-125.136	-148.387	119.163	48.9362	135.059	-74.5045	38.6659	71.4246	-30.889	138.623	142.249	165.683	-14.6714	96.4285	-8.19144	115.934	-115.676	-61.0703	-50.3732	-128.073	61.1908	77.3256	0.7086	90.6781			-136.393	-8.13708	27.0523	-87.6995	132.576	128.308	-102.855	-176.158	-133.688	135.886	-65.8158	-56.7961	-40.5414	166.183	-109.051	-12.6221	-105.134	12.5266	48.2831	145.221	44.0497	-147.589
1.5	-98.9782	-126.182	-149.599	119.609	49.3015	136.881	-74.4728	38.8213	72.1102	-31.239	138.448	142.168	167.538	-15.2741	96.2564	-7.66608	117.49	-117.429	-62.8	-51.1837	-129.399	62.138	78.4183	0.63192	92.3462			-138.626	-7.80192	28.1452	-88.6531	132.904	129.392	-102.63	-176.369	-134.496	136.65	-65.7666	-56.5614	-40.5175	167.224	-109.319	-15.0248	-107.37	12.3146	47.5747	146.297	43.8431	-149.148
1.51	-99.0434	-126.881	-150.003	119.721	49.0956	137.717	-74.7798	39.1262	73.1509	-31.8742	139.745	144.758	167.982	-16.2556	98.5633	-8.10204	117.36	-117.832	-62.364	-51.4966	-131.494	62.9809	78.9728	0.57	92.3816			-138.532	-7.7976	28.2169	-89.4182	134.502	129.705	-104.235	-178.985	-135.78	137.355	-67.6655	-57.794	-40.5989	168.57	-109.997	-14.9406	-107.195	12.5273	47.5464	146.965	43.7881	-150.165
1.52	-99.9302	-127.932	-150.982	120.264	49.0608	139.578	-74.6448	39.1728	73.6172	-32.3356	139.765	144.217	169.759	-16.3514	98.3432	-8.82636	118.666	-119.148	-64.9553	-51.7604	-130.77	63.1393	79.9865	0.73104	94.338			-140.706	-7.51356	28.485	-91.1976	134.953	130.442	-104.851	-179.027	-136.332	138.451	-67.7281	-57.3668	-40.5968	168.894	-110.061	-13.826	-109.494	12.3053	46.4954	147.795	44.2273	-150.713
1.53	-100.132	-128.639	-151.162	120.289	49.9884	140.192	-74.8963	39.5501	74.4899	-32.5247	140.982	145.964	170.144	-17.6593	100.692	-9.58224	118.913	-120.454	-64.5488	-52.3181	-132.887	63.9481	80.3926	0.71892	94.3136			-140.947	-7.49004	28.5246	-91.0006	134.969	130.856	-105.495	-181.443	-137.267	138.998	-69.4778	-58.5496	-40.6904	170.863	-110.733	-12.9186	-109.506	12.2156	46.408	148.508	43.7338	-151.77
1.54	-100.895	-129.813	-153.101	120.689	50.0772	141.691	-75.121	39.3755	75.2999	-33.5658	141.546	147.452	171.799	-17.5858	100.474	-10.2937	119.405	-120.68	-66.4572	-52.3478	-134.169	63.9719	81.5669	0.41244	96.0056			-142.698	-7.21236	28.5713	-93.7206	136.773	131.568	-107.299	-181.682	-138.525	140.278	-70.2071	-59.4562	-40.8347	170.652	-110.893	-11.5658	-111.123	12.2848	45.7802	149.434	43.3417	-151.68
1.55	-101.166	-130.435	-152.98	120.835	49.9909	142.942	-75.0322	39.869	75.7115	-34.2158	142.252	147.001	172.191	-18.816	102.666	-9.80232	119.963	-122.642	-67.0742	-53.1444	-134.353	65.2026	81.8096	0.99108	96.2899			-143.308	-7.04004	28.7929	-93.0994	136.517	132.303	-107.103	-183.536	-138.855	141.154	-71.3256	-58.9734	-40.8296	173.157	-111.49	-11.5346	-111.469	11.8484	45.4048	150.053	43.5038	-154.057
1.56	-101.71	-131.959	-155.048	120.721	50.1209	143.845	-75.5728	39.9526	76.6007	-34.7466	143.033	148.986	173.82	-18.5806	102.395	-9.97332	119.973	-122.534	-67.5234	-52.7464	-135.052	65.237	83.0976	0.72228	97.4648			-144.38	-6.82656	28.6586	-95.9323	139.206	132.695	-108.906	-183.87	-140.26	141.925	-72.4798	-61.1221	-41.0994	172.865	-111.709	-12.7019	-112.345	12.1699	45.2114	150.731	43.1128	-153.778
1.57	-102.48	-132.405	-154.901	120.937	49.8631	145.422	-75.2892	40.3394	77.3096	-36.1952	143.488	149.373	174.601	-20.0664	104.892	-10.451	120.516	-124.699	-69.7613	-53.6866	-136.681	66.1699	83.3084	1.12584	97.8223			-145.925	-6.54696	29.0048	-95.5792	138.893	133.788	-108.688	-185.532	-141.15	143.318	-73.0884	-61.1414	-41.4085	175.214	-112.173	-13.1755	-113.331	11.5338	44.6202	151.85	42.9239	-156.441
1.58	-102.59	-134.229	-156.97	120.867	50.209	145.945	-75.7741	40.5336	77.602	-36.4096	144.592	149.903	175.648	-19.6262	104.604	-11.145	120.744	-124.659	-69.0865	-53.1682	-136.301	66.2989	84.6578	1.19124	99.6538			-146.133	-6.24132	28.7119	-97.709	140.759	133.906	-110.507	-185.756	-141.546	143.5	-74.6882	-61.9254	-41.5682	175.294	-112.401	-12.0608	-114.046	12.0007	44.489	152.162	43.2283	-156.112
1.59	-103.562	-134.016	-156.848	121.001	49.8295	147.879	-75.6014	41.0579	78.6607	-37.9372	144.777	151.521	176.654	-20.903	107.144	-11.9518	121.451	-126.711	-71.6095	-53.8198	-138.154	66.844	84.8938	1.27308	99.6428			-148.122	-6.01308	29.1523	-98.7404	141.349	135.296	-110.479	-188.284	-142.947	144.825	-74.7922	-64.1052	-42.1054	176.691	-112.882	-10.6984	-115.434	11.3356	44.1808	153.837	42.6539	-158.526
1.6	-103.533	-136.354	-158.873	120.983	50.0104	147.866	-75.9076	41.0892	78.9947	-38.785	146.349	151.127	177.41	-20.9681	107.079	-11.991	121.615	-126.769	-71.3791	-53.6272	-138.485	67.0816	86.2571	1.51776	101.76			-148.014	-5.71644	28.7317	-99.438	141.71	135.298	-111.847	-188.103	-143.29	145.551	-76.9476	-63.55	-42.1022	177.576	-113.049	-10.3301	-115.798	11.6305	43.905	153.81	42.8287	-158.776
1.61	-104.631	-136.318	-158.883	120.913	50.0722	150.177	-75.9052	41.7725	79.8697	-39.3421	146.069	152.5	178.882	-21.5994	109.166	-10.8304	122.541	-128.328	-72.9826	-53.5957	-139.127	67.531	86.4152	1.45416	101.844			-150.306	-5.5194	29.2458	-101.103	143.1	136.758	-112.5	-190.91	-144.31	145.863	-76.5796	-65.528	-43.0722	178.036	-113.592	-10.3759	-117.741	11.1396	43.8138	155.476	42.517	-160.419
1.62	-104.303	-138.118	-160.922	121.109	50.0659	150.066	-75.7939	41.7498	80.5879	-40.9426	147.942	152.924	179.09	-22.1776	109.304	-11.271	122.527	-128.614	-73.8661	-53.7541	-141.117	67.7935	87.7764	1.60092	103.677			-149.786	-5.52576	28.8338	-101.238	143.209	136.625	-112.818	-190.587	-145.377	147.164	-78.9568	-66.2086	-42.7608	179.075	-113.748	-10.1167	-117.899	11.4974	43.7174	155.93	41.8751	-161.019
1.63	-105.289	-138.091	-160.591	120.86	50.4814	152.392	-76.2032	42.4517	80.9609	-41.2214	147.768	153.199	180.952	-22.7885	111.076	-11.3404	123.63	-130.13	-74.2486	-53.4197	-140.528	68.0939	87.79	1.9092	104			-152.745	-5.26812	29.3309	-103.627	144.718	138.007	-114.653	-193.423	-145.695	147.37	-78.6444	-66.7469	-43.8083	180.137	-114.228	-10.4852	-119.969	11.0471	43.4216	157.55	42.2158	-162.563
1.64	-105.219	-139.957	-162.943	121.149	50.5226	152.272	-75.8438	42.4627	81.7918	-42.4108	149.255	154.459	180.99	-22.9915	111.335	-10.8061	123.673	-130.618	-76.4058	-53.8009	-142.849	68.5932	89.4996	1.76628	105.406			-152.342	-5.28096	28.8612	-103.24	145.339	137.909	-114.313	-193.295	-147.199	148.187	-80.4853	-68.6101	-43.3998	180.889	-114.54	-10.1318	-120.105	11.124	43.3886	158.202	41.3677	-163.412
1.65	-105.354	-139.967	-162.564	120.841	50.8502	154.524	-76.3492	43.0418	82.1099	-43.3673	149.213	154.121	183.036	-24.1008	112.893	-11.0903	124.601	-131.938	-75.8476	-53.4391	-143.13	68.7238	89.9161	1.89288	105.757			-154.336	-5.00556	29.2026	-106.038	146.112	139.303	-116.161	-196.168	-147.704	148.952	-80.1895	-68.1842	-44.4536	182.904	-115.144	-8.64864	-122.55	11.0014	43.0286	159.264	41.1994	-164.605
1.66	-105.462	-142.222	-165.213	121.042	51.3263	154.501	-76.0772	43.0331	82.6043	-43.8408	150.769	155.562	183.15	-24.3814	113.022	-11.5705	124.714	-132.941	-78.1469	-53.5415	-143.578	68.9432	91.1266	1.95612	107.477			-155.266	-4.91724	28.9565	-105.608	148.277	139.177	-115.946	-196.174	-148.487	149.34	-82.2061	-70.4962	-44.164	183.581	-115.222	-7.68204	-122.495	10.8136	42.9877	160.364	41.0788	-166.191
1.67	-105.791	-141.833	-165.686	120.99	51.1272	156.442	-76.2208	43.3031	83.2475	-45.1978	150.677	155.487	185.232	-25.1032	114.561	-10.8612	125.214	-133.544	-78.0455	-53.4668	-146.065	69.1103	92.0813	1.91832	107.745			-156.259	-4.71564	29.0736	-108.03	147.517	140.534	-117.705	-198.166	-149.818	150.113	-81.7192	-70.4131	-45.268	185.314	-116.153	-8.86116	-124.03	11.0572	42.8887	161.034	40.5247	-166.916
1.68	-106.183	-144.323	-167.059	120.948	51.4499	156.842	-76.3122	43.5355	83.2145	-45.5246	152.142	156.099	185.29	-25.4528	114.66	-12.04	125.444	-134.995	-79.2194	-53.3627	-145.744	69.217	92.6129	2.04336	109.391			-158.543	-4.4892	29.0461	-108.079	150.377	140.788	-118.299	-198.89	-150.029	150.347	-83.7929	-71.4668	-45.0932	186.671	-116.071	-8.49336	-124.254	10.7798	41.9156	162.119	40.119	-168.537
1.69	-106.225	-144.057	-168.147	121.415	51.8162	158.116	-75.7042	43.6295	83.7374	-46.3001	152.217	157.233	187.456	-25.7036	116.145	-12.5852	126.057	-135.412	-81.0859	-53.5104	-147.116	69.452	93.8059	1.78056	110.071			-158.382	-4.3914	29.1113	-108.925	150.898	141.734	-118.465	-199.821	-151.59	150.993	-83.5435	-73.3145	-46.1736	187.511	-117.241	-8.24412	-125.909	11.1202	41.5574	162.743	40.3736	-169.009
1.7	-106.717	-146.516	-169.113	121.596	51.5588	159.143	-75.61	43.7551	83.5506	-47.126	153.586	156.704	187.632	-26.3916	116.346	-11.5986	125.948	-136.987	-80.6599	-53.319	-147.975	69.3454	94.2926	2.17116	111.486			-161.111	-4.26252	29.2972	-111.442	151.281	142.58	-120.414	-201.137	-152.661	151.038	-85.7358	-72.6943	-46.134	189.771	-117.188	-8.76336	-125.675	10.9159	41.6803	164.052	39.6653	-171.16
1.71	-106.624	-146.664	-169.989	121.646	52.1923	159.788	-75.4205	44.0633	83.5652	-47.7341	153.633	158.125	189.505	-26.4107	117.472	-12.2366	126.633	-137.215	-83.4634	-53.7146	-148.423	69.5172	95.2459	1.84908	112.165			-160.761	-4.2396	29.2812	-110.897	152.675	143.091	-119.879	-202.276	-153.422	151.501	-85.4941	-74.8536	-47.1632	189.864	-118.394	-8.08464	-127.902	11.1859	40.9114	164.609	39.9505	-170.732
1.72	-107.278	-148.229	-170.696	121.818	52.0384	161.269	-74.5247	44.45	83.9422	-48.9078	154.971	158.354	189.966	-27.2008	117.92	-13.2224	126.705	-139.61	-83.908	-53.2627	-149.807	69.4758	96.1274	2.38656	113.25			-163.56	-4.22952	29.564	-113.978	152.916	144.582	-121.091	-204.037	-155.428	152.392	-87.534	-75.1333	-47.3188	192.422	-118.459	-8.07024	-127.892	11.1766	40.9186	165.809	39.3241	-173.759
1.73	-107.148	-149.581	-173.014	121.817	52.3192	161.534	-74.5651	44.499	83.9866	-49.3024	155.121	158.792	191.342	-27.0686	118.525	-12.3853	127.177	-139.189	-84.8808	-53.8511	-150.48	69.5538	96.6258	2.33136	113.538			-163.156	-4.37148	29.6126	-113.576	154.195	144.629	-121.227	-204.739	-156.004	152.58	-87.5116	-75.8598	-48.0541	192.33	-119.646	-8.42664	-130.179	11.1967	40.7684	166.024	39.0352	-173.256
1.74	-107.821	-150.105	-172.607	121.88	52.2938	163.148	-73.7303	45.1264	84.3385	-50.5133	156.498	159.91	192.171	-28.0645	119.009	-12.3685	127.24	-141.415	-87.0859	-53.3189	-150.781	69.6979	97.8438	2.43756	114.582			-165.952	-4.09284	29.7768	-116.061	155.029	146.483	-122.235	-206.764	-157.415	153.563	-89.2975	-77.693	-48.4663	194.948	-119.814	-7.68576	-130.015	11.6071	40.3879	167.474	39.045	-176.126
1.75	-107.731	-151.854	-176.004	121.886	52.5094	163.2	-73.5245	44.9489	84.8701	-51.3487	156.48	159.624	193.057	-27.8742	119.532	-12.4008	127.582	-141.684	-86.6502	-53.99	-153.451	69.7474	98.3378	3.01848	115.518			-165.777	-4.23744	30.3182	-116.571	155.846	146.568	-122.808	-207.201	-158.995	154.333	-89.4593	-77.3167	-49.0117	194.605	-121.049	-5.53608	-132.561	11.3582	40.5745	167.466	38.0209	-175.821
1.76	-108.349	-152.004	-175.549	121.866	52.8413	164.96	-73.1327	45.4878	84.9056	-51.8282	157.822	161.262	194.494	-28.8922	119.99	-12.3395	127.608	-143.241	-89.4624	-53.6101	-152.931	69.9079	99.678	2.86548	116.046			-168.093	-4.29696	30.2228	-117.514	157.48	148.625	-123.424	-208.712	-159.606	154.733	-91.019	-79.3028	-49.6844	197.257	-121.156	-6.07524	-132.216	11.9408	40.0621	169.205	37.9892	-178.273
1.77	-108.498	-154.194	-178.204	121.829	52.7138	164.849	-72.6186	45.1801	85.1321	-53.0681	158.403	161.183	194.794	-28.9844	120.547	-12.5707	128.003	-143.964	-89.0484	-54.0787	-154.558	69.9655	99.9166	3.31692	117.386			-168.552	-4.06236	30.8414	-119.755	157.174	148.401	-124.879	-208.904	-161.976	155.969	-91.8044	-79.3457	-49.9423	196.719	-122.815	-7.1184	-134.997	11.912	40.1465	169.23	37.8709	-178.921
1.78	-108.888	-154.062	-178.26	121.725	53.4984	166.596	-72.6084	45.8594	85.1623	-53.5408	159.286	161.87	196.966	-29.3009	121.072	-12.5855	127.894	-144.868	-90.704	-53.985	-155.725	70.1063	101.576	3.58968	117.699			-169.944	-4.22196	30.7747	-119.438	159.826	150.348	-125.091	-211.262	-162.092	156.542	-92.8369	-80.2286	-50.764	198.841	-122.884	-6.02412	-134.556	12.3498	39.8556	170.866	37.5506	-179.986
1.79	-109.222	-156.157	-180.269	121.598	53.2932	166.793	-71.8236	45.762	85.2382	-54.1549	160.084	163.449	196.957	-30.1158	121.451	-12.4456	128.504	-145.818	-92.4143	-54.1033	-155.841	70.5355	101.571	3.76524	118.705			-171.479	-3.81336	31.3922	-122.117	159.277	150.667	-126.943	-211.306	-163.893	157.303	-93.9028	-81.9916	-50.9599	199.116	-124.43	-4.62888	-137.157	12.5167	39.5676	170.927	37.3768	-182.721
1.8	-109.251	-156.09	-180.34	121.596	53.7361	168.039	-72.0767	46.4453	85.367	-55.1314	160.596	163.043	199.038	-29.7353	121.982	-12.3043	128.311	-146.739	-92.1564	-54.5958	-157.07	70.4058	103.299	3.81936	119.24			-171.914	-4.07424	31.1606	-121.496	161.294	152.002	-126.522	-213.921	-164.986	158.633	-94.6816	-81.6307	-51.5134	199.87	-124.524	-4.749	-136.988	12.7664	39.6619	172.276	37.5209	-182.214
1.81	-109.782	-158.325	-182.102	121.4	53.9519	168.637	-71.4317	46.4528	85.3024	-55.368	161.817	165.039	199.149	-30.3406	122.257	-11.7775	129.161	-147.792	-94.9385	-54.633	-158.235	70.447	103.275	4.28604	120.101			-173.971	-3.69648	31.8416	-124.075	161.925	152.615	-128.725	-213.628	-165.568	159.009	-96.3544	-83.7869	-51.7765	201.368	-126.216	-5.4966	-139.201	13.2038	39.3948	173.293	37.0919	-184.549
1.82	-109.719	-158.199	-182.57	121.265	54.0448	169.574	-71.3334	47.0381	85.4587	-56.696	161.874	165.518	201.386	-30.37	122.764	-11.8885	128.801	-148.278	-94.2961	-55.3674	-158.162	70.5773	104.873	3.9882	120.367			-173.95	-3.88992	31.6638	-123.98	162.474	153.514	-129.073	-216.112	-167.251	160.769	-96.6025	-84.3092	-52.3434	201.067	-126.145	-4.35036	-139.701	13.1798	39.3406	173.296	37.0837	-184.891
1.83	-110.612	-160.251	-183.472	121.103	54.1007	171.035	-71.4052	47.3989	85.6152	-56.9082	162.991	165.891	201.375	-32.0987	123.352	-11.9411	129.524	-149.707	-96.1402	-55.9564	-160.995	70.5494	104.718	4.44144	122.047			-176.574	-3.6804	31.9158	-125.86	164.337	154.406	-129.363	-216.267	-168.072	161.078	-98.6238	-84.6272	-52.5179	203.51	-128.325	-3.68004	-140.339	13.8426	39.169	175.13	36.7541	-185.851
1.84	-110.474	-160.176	-185.237	120.959	54.3838	171.501	-70.8725	47.5422	85.624	-57.8688	162.996	167.789	203.358	-31.8496	123.638	-11.5892	129.931	-150.097	-97.8167	-56.1809	-160.424	70.5622	106.247	4.21284	122.247			-176.238	-3.91512	32.1826	-126.411	164.452	154.9	-131.678	-217.789	-168.721	162.336	-98.6846	-86.3047	-53.0286	203.129	-128.052	-4.81716	-141.716	13.6292	38.9856	174.87	36.7697	-187.083
1.85	-111.381	-161.935	-184.977	120.879	54.0851	173.574	-71.1047	47.7512	86.298	-58.7537	163.874	167.241	203.554	-33.5855	124.249	-12.6193	130.385	-151.449	-97.5104	-56.8255	-162.346	70.3732	106.116	4.71852	123.656			-179.053	-3.70716	31.9187	-127.629	165.351	155.914	-130.974	-218.3	-170.292	163.418	-100.825	-85.9346	-53.4443	205.463	-130.262	-4.36872	-142.285	14.3563	39.0263	176.316	36.534	-187.588
1.86	-111.211	-162.016	-187.081	120.692	54.3628	173.873	-70.6751	47.9636	86.4966	-59.1866	164.108	169.411	204.998	-33.5566	124.351	-12.9137	130.763	-151.881	-100.303	-57.1028	-163.794	70.5558	107.821	4.52208	123.97			-178.61	-3.96792	32.6473	-128.837	166.248	155.86	-133.004	-220.413	-170.939	163.924	-100.935	-87.3212	-53.8243	205.19	-129.856	-3.22116	-143.625	14.0873	38.5058	176.497	36.5692	-189.667
1.87	-112.002	-163.618	-186.885	120.579	53.9482	176.084	-70.7626	48.1457	86.9495	-60.5444	164.458	169.916	206.012	-34.784	125.135	-12.1076	131.223	-153.256	-99.782	-58.3204	-163.957	70.4454	107.643	5.0922	124.806			-181.343	-3.76104	32.1649	-129.31	166.762	157.01	-133.368	-221.131	-172.044	165.473	-102.212	-87.7549	-54.197	207.823	-132.512	-4.32396	-144.222	14.8903	38.815	178.234	36.4998	-189.819
1.88	-112.064	-163.777	-188.322	120.404	54.085	176.315	-70.655	48.59	87.3853	-60.6798	164.356	170.21	206.838	-34.7101	125.341	-11.6779	131.702	-153.694	-101.842	-58.0564	-165.721	70.9471	109.49	5.07792	125.003			-181.353	-4.15656	32.8987	-131.27	168.702	157.053	-134.122	-223.023	-173.484	165.653	-102.576	-87.9127	-54.5992	207.59	-132.457	-3.98244	-145.74	14.6131	38.3959	178.513	36.0391	-192.223
1.89	-112.575	-165.284	-188.328	120.284	54.0286	178.659	-70.1867	48.616	87.4487	-61.6534	165.11	172.445	208.486	-35.9028	126.012	-11.5434	132.084	-155.17	-102.864	-59.4918	-166.125	70.7027	109.359	5.74164	126.138			-183.809	-3.9858	32.2764	-131.133	168.203	158.069	-135.623	-224.353	-174.069	166.786	-104.113	-89.0783	-54.8425	209.978	-135.012	-2.45244	-146.215	15.4676	38.2433	179.824	36.3781	-191.809
1.9	-112.656	-165.367	-190.042	120.231	53.5684	178.773	-70.5344	49.0306	88.0073	-62.5992	164.904	171.789	208.62	-35.7581	126.206	-11.0825	132.788	-155.539	-103.22	-59.152	-166.757	71.3651	111.076	5.8212	126.647			-183.914	-4.3284	33.4205	-133.894	170.886	158.289	-135.474	-224.905	-175.554	167.623	-104.148	-88.8533	-55.22	209.93	-134.957	-2.97588	-147.956	14.9798	38.2103	180.036	35.6046	-194.881
1.91	-113.304	-167.176	-190.006	120.212	53.6162	180.969	-69.7938	49.1447	88.4652	-63.084	165.77	174.014	210.633	-36.9329	126.795	-11.4731	133.19	-157.234	-105.703	-60.4009	-168.23	71.4654	110.949	6.15336	127.383			-186.009	-4.3116	32.6233	-133.287	170.678	159.157	-137.162	-226.898	-176.831	168.135	-106.352	-89.687	-55.5391	211.997	-137.031	-2.8488	-147.974	15.828	37.5424	181.192	35.8734	-194.483
1.92	-113.558	-167.151	-191.858	120.276	53.4322	182.101	-70.1712	49.3932	88.6378	-64.3484	165.749	174.816	210.599	-37.2515	126.768	-11.9071	134.293	-157.308	-105.298	-60.5057	-167.976	71.7541	112.722	6.65784	128.177			-186.96	-4.497	33.3277	-136.017	172.212	159.314	-136.97	-226.78	-177.35	169.339	-106.673	-90.116	-55.7952	212.376	-137.422	-2.38332	-149.983	15.3797	37.7695	181.886	35.3599	-196.838
1.93	-113.946	-169.196	-191.161	120.14	53.1482	183.218	-69.872	49.8614	89.2376	-64.8991	166.437	174.793	212.674	-37.9794	127.465	-11.4678	134.465	-158.999	-107.732	-61.1537	-169.944	72.3808	112.699	6.93084	128.669			-188.068	-4.719	32.3112	-136.026	173.938	159.741	-138	-229.735	-179.247	169.811	-108.383	-90.2688	-56.2112	213.905	-138.975	-3.1614	-149.744	16.0891	36.7796	182.613	35.2312	-197.026
1.94	-114.303	-169.129	-192.838	120.142	53.1083	185.191	-69.4202	49.8516	89.3216	-65.6648	166.481	177.165	212.663	-38.6773	127.365	-10.9895	136.121	-159.094	-107.659	-62.0152	-170.011	72.0126	114.169	7.25436	129.355			-189.483	-4.87116	32.2621	-137.728	173.705	159.796	-138.952	-229.536	-179.913	170.449	-108.865	-90.8368	-56.5614	214.808	-139.344	-2.58024	-151.516	15.7836	36.8034	183.696	34.9735	-197.991
1.95	-114.587	-171.099	-192.987	120.135	52.8629	185.657	-69.8144	50.3218	89.6752	-66.5638	167.223	176.823	214.638	-39.1324	128.073	-10.2974	136.062	-161.019	-108.573	-61.6818	-170.789	72.699	114.398	7.73472	130.304			-190.055	-5.36172	31.8478	-139.002	176.459	159.839	-139.091	-232.194	-180.99	171.373	-110.751	-90.6712	-57.0353	215.961	-141.174	-1.34124	-151.528	16.1852	36.2641	183.841	34.7642	-198.969
1.96	-115.106	-171.19	-193.198	120.137	52.7	187.979	-69.2682	50.0932	90.352	-67.0612	167.259	178.271	214.951	-39.7127	128.029	-9.96876	138.071	-161.068	-110.548	-63.3786	-172.727	72.3936	115.554	7.92072	131.243			-191.79	-5.35656	30.8645	-139.278	175.962	160.487	-140.515	-232.409	-182.738	171.358	-111.107	-91.0973	-57.4446	217.281	-141.575	-1.79844	-153.599	15.9648	35.0483	185.628	34.2407	-199.551
1.97	-115.317	-173.08	-194.686	120.167	52.6777	188.126	-69.4226	50.6189	90.4979	-67.864	168.178	179.403	216.567	-40.0027	128.821	-10.8206	137.755	-162.751	-109.833	-62.6243	-172.09	72.9648	115.77	8.51568	132.309			-192.123	-6.0024	31.1992	-141.914	177.883	160.383	-140.37	-233.839	-183.054	172.154	-112.951	-91.3386	-58.0164	217.947	-143.172	-1.53216	-153.192	15.9712	35.5846	185.574	34.436	-201.078
1.98	-115.813	-173.094	-193.661	120.21	52.234	190.496	-69.2017	50.6603	91.267	-68.3224	168.173	179.557	217.24	-40.5332	128.722	-11.8385	139.667	-162.992	-111.6	-63.9738	-174.504	72.7408	116.924	8.64576	133.194			-193.552	-5.87736	30.0935	-141.24	178.597	160.872	-142.075	-234.396	-184.681	172.529	-113.359	-91.2478	-58.5529	219.568	-143.692	-0.40116	-155.577	16.1441	33.8777	186.885	33.6029	-201.339
1.99	-116.187	-174.978	-195.787	120.152	52.3568	190.56	-68.9729	50.9662	91.8503	-69.4349	169.28	181.76	218.513	-40.5898	129.543	-11.9304	139.56	-164.733	-112.303	-63.8993	-174.932	73.4129	117.136	9.16164	134.195			-193.681	-6.59856	29.7394	-144.107	178.835	160.946	-142.794	-235.988	-185.735	173.223	-114.797	-91.9566	-59.0618	219.837	-145.128	-0.88788	-155.381	15.9095	33.4867	187.344	33.5912	-203.4
2	-116.841	-174.926	-194.888	120.251	52.2464	192.958	-69.1562	51.1938	92.0998	-70.3309	169.656	181.012	219.709	-41.2042	129.513	-10.8935	141.045	-164.97	-112.355	-64.6128	-175.383	73.2544	118.222	9.20208	135.102			-195.544	-6.36888	29.1007	-144.283	179.936	161.318	-143.299	-236.357	-186.192	173.768	-115.823	-91.4418	-59.8943	221.206	-145.531	-1.03164	-157.056	16.1893	33.2262	188.281	33.4172	-203.2
2.01	-117.023	-177.167	-196.793	120.216	52.2497	193.271	-69.0722	51.3836	92.962	-71.0771	170.23	182.581	220.208	-41.3167	130.498	-9.9138	141.12	-166.509	-113.789	-65.2606	-177.553	74.1697	118.554	9.438	135.963			-195.437	-7.047	27.9266	-145.71	180.455	161.435	-144.813	-238.341	-187.843	174.102	-116.238	-92.9502	-59.9659	221.55	-147.081	0.17208	-157.381	15.7868	31.4902	188.997	32.607	-205.749
2.02	-117.874	-176.985	-196.442	120.315	52.2948	194.975	-69.1283	51.3671	93.264	-72.7301	170.838	182.746	221.522	-41.312	130.233	-9.49884	142.377	-166.772	-113.98	-65.3394	-177.6	74.052	119.735	9.96288	137.625			-197.808	-6.8364	27.9494	-147.377	181.073	161.842	-144.629	-239.28	-188.342	174.899	-117.334	-92.7792	-61.1906	222.762	-147.454	0.13116	-158.438	16.0734	31.8864	189.823	33.009	-205.06
2.03	-117.937	-179	-197.99	120.334	51.8732	196.045	-69.4517	51.5464	93.8002	-73.4065	171.224	183.824	221.981	-41.7154	131.365	-9.3408	143.163	-168.109	-114.084	-66.4028	-177.858	74.9712	120.13	9.71304	138.027			-197.873	-7.46364	26.6777	-147.523	183.072	162.14	-146.119	-240.722	-189.425	175.141	-117.408	-93.5047	-60.9958	222.982	-149.058	-0.16632	-159.216	15.5806	30.9092	190.873	32.1114	-207.852
2.04	-118.833	-179.129	-198.063	120.351	52.135	196.805	-69.0931	51.4577	94.428	-74.5147	172.321	185.551	223.163	-40.9994	131.03	-8.98656	143.797	-168.587	-115.304	-65.66	-179.242	74.9107	121.131	10.3999	139.165			-200.049	-7.29048	26.7334	-149.612	182.621	162.355	-146.263	-242.262	-190.971	175.557	-119.123	-94.7281	-62.0815	224.547	-149.301	0.77964	-159.784	15.8989	29.6762	190.945	31.7789	-208.083
2.05	-118.898	-180.603	-199.509	120.468	51.6421	198.583	-69.6437	51.5074	94.7219	-75.8084	172.539	185.316	223.608	-41.3167	132.233	-9.29616	144.993	-169.676	-114.885	-66.7993	-179	75.6826	121.548	10.3752	139.665			-200.26	-7.8096	25.6794	-149.381	185.027	163.021	-147.49	-242.589	-191.377	175.804	-119.187	-94.4773	-61.8937	224.516	-150.748	0.04044	-160.949	15.4886	29.6216	192.804	31.7941	-209.461
2.06	-119.52	-180.7	-199.924	120.461	51.7499	198.805	-69.4876	51.8021	95.3878	-76.2322	173.771	187.378	224.67	-41.262	131.968	-8.62704	145.443	-170.243	-116.441	-66.3166	-179.891	75.8832	122.368	10.606	140.954			-201.766	-7.6122	25.757	-151.903	184.616	162.995	-147.84	-244.741	-193.036	175.87	-121.197	-96.106	-62.7425	226.822	-151.122	-0.03408	-161.323	15.7789	27.6625	192.541	30.5977	-210.902
2.07	-120.013	-182.438	-201.178	120.563	51.5447	201.093	-69.7122	51.7874	95.8842	-77.4478	173.835	187.438	225.489	-41.4152	133.083	-7.57512	146.56	-171.348	-116.078	-66.3284	-180.81	76.4603	123.072	11.256	141.312			-203.169	-8.22948	24.6594	-151.39	186.268	164.002	-148.938	-244.535	-194.217	176.129	-121.059	-96.1079	-63.0424	227.114	-152.802	0.88836	-162.321	15.5149	27.9832	194.2	30.4444	-211.25
2.08	-120.231	-182.517	-201.936	120.663	51.1637	201.036	-70.0223	52.3188	96.2002	-77.9676	175.213	188.198	226.166	-42.2369	132.885	-7.59108	146.986	-171.974	-117.095	-66.6379	-181.34	76.638	123.619	10.8583	143.349			-203.644	-7.93428	24.741	-153.786	187.505	163.924	-149.713	-247.588	-194.776	176.041	-123.087	-96.8395	-63.238	229.01	-152.994	0.47472	-162.778	15.5906	26.4761	194.544	30.3017	-212.51
2.09	-121.296	-184.116	-203.012	120.704	51.0509	203.228	-70.0109	52.1186	96.8155	-79.3096	175.208	189.888	227.44	-42.0644	133.886	-7.74432	148.273	-173.152	-117.911	-66.3652	-183.802	77.1539	124.515	11.6446	143.302			-205.968	-8.69532	23.7342	-153.837	187.277	165.063	-150.048	-247.395	-196.431	176.292	-122.937	-98.3638	-64.0699	229.259	-154.526	0.44136	-163.576	15.5336	25.2635	195.784	28.6483	-212.652
2.1	-121.161	-184.158	-203.14	120.82	51.4111	203.161	-70.7873	52.8421	97.0518	-80.3287	176.625	189.473	227.717	-43.407	133.762	-7.91376	148.534	-173.841	-117.96	-66.709	-183.237	77.6179	124.971	11.4443	145.812			-205.755	-8.466	24.0379	-155.511	188.635	164.989	-152.149	-250.622	-197.062	176.347	-125.011	-97.8368	-63.7009	231.503	-155.085	1.3134	-163.832	15.4796	25.4166	197.017	28.7051	-214.474
2.11	-122.329	-185.618	-204.566	121.007	51.0271	205.368	-70.5467	52.7986	97.5188	-81.104	176.514	191.286	229.338	-43.2607	134.51	-8.37528	150.352	-175.073	-119.114	-66.6946	-185.2	77.9978	125.997	11.7892	145.716			-208.407	-9.13788	22.9032	-156.428	189.503	166.352	-151.936	-250.308	-197.991	176.514	-124.542	-99.3746	-64.8721	231.564	-156.334	1.65768	-165.16	15.4031	23.3492	197.712	27.991	-214.34
2.12	-122.289	-185.631	-204.841	121.018	51.5618	205.36	-71.3653	53.088	97.9453	-83.164	177.832	191.245	229.72	-44.463	134.513	-7.48236	150.366	-175.764	-119.253	-66.6068	-185.569	78.4829	126.84	12.1171	147.318			-208.107	-8.86464	23.2	-157.04	189.612	166.234	-154.276	-253.021	-199.78	176.84	-126.853	-99.5545	-64.6135	233.706	-157.181	1.08696	-164.996	15.3724	23.9698	198.962	27.243	-216.537
2.13	-123.165	-187.319	-206.298	121.079	51.5923	207.05	-71.0876	53.4607	98.1493	-83.556	177.766	192.519	231.104	-44.7576	135.033	-6.16164	151.532	-176.677	-120.185	-66.9768	-186.175	78.7541	127.611	11.991	147.694			-210.811	-9.62592	22.1659	-159.148	191.686	167.82	-153.505	-253.423	-200.069	176.886	-126.464	-100.477	-65.5408	234.2	-157.992	1.62024	-166.319	15.4795	22.0434	199.3	27.332	-216.34
2.14	-123.345	-187.34	-206.816	121.158	51.443	207.395	-71.6118	53.2759	98.4792	-85.1326	179.083	193.261	231.597	-45.3331	135.07	-6.42204	151.81	-177.709	-120.67	-66.6386	-186.894	79.1414	128.442	12.8951	149.248			-210.462	-9.4818	22.4258	-158.658	191.162	168.272	-155.24	-254.411	-201.98	177.237	-128.768	-101.124	-65.3509	235.666	-159.02	1.20084	-166.469	15.3326	21.6493	200.872	26.7253	-218.872
2.15	-123.632	-189.101	-207.926	121.134	51.3262	208.715	-72.0193	53.5426	98.8373	-86.2038	178.974	193.57	232.757	-45.9191	135.498	-6.37104	152.898	-178.168	-121.266	-67.2281	-187.397	79.2007	129.307	12.524	149.495			-212.296	-10.0074	21.4476	-161.461	193.363	170.012	-156.569	-256.033	-202.836	177.478	-128.645	-101.488	-65.8895	237.031	-159.76	1.02708	-167.759	15.622	21.3678	200.948	26.5604	-218.522
2.16	-124.27	-189.188	-208.585	121.332	51.6132	208.975	-71.6459	53.4529	98.9309	-87.0583	179.975	195.207	233.622	-46.0238	135.461	-5.24724	153.458	-179.422	-121.755	-66.9535	-188.213	79.6298	129.962	13.6664	151.756			-213.055	-9.89952	21.5717	-160.849	194.6	170.565	-156.384	-256.653	-203.535	177.62	-130.474	-102.518	-65.923	237.343	-161.025	1.63716	-168.171	15.4457	20.1613	202.878	26.378	-221.299
2.17	-124.158	-191.091	-209.581	121.145	51.486	209.892	-72.3702	53.7629	99.2712	-88.9374	180.182	194.773	234.517	-46.9187	135.86	-4.87968	153.858	-179.732	-122.492	-67.5329	-189.324	79.4754	130.964	13.7712	151.828			-213.662	-10.1472	20.465	-163.134	194.65	172.381	-158.217	-258.466	-205.302	177.962	-130.765	-102.598	-66.3032	239.579	-161.563	2.05728	-169.397	15.9446	19.9901	202.865	25.4275	-220.954
2.18	-124.699	-190.93	-210.283	121.317	51.6828	210.131	-71.9484	53.7767	99.3982	-89.1041	180.147	196.989	235.828	-46.8265	135.718	-5.82984	154.848	-180.957	-122.643	-67.1941	-189.568	80.1452	131.467	14.1598	153.856			-215.026	-10.2347	20.1354	-163.569	195.852	173.136	-158.156	-258.916	-205.99	177.967	-132.136	-103.924	-66.4045	239.488	-162.891	1.1034	-170.425	15.691	19.051	204.516	25.7819	-223.438
2.19	-124.862	-192.763	-210.657	121.159	51.5723	210.752	-72.9186	54.2027	99.5006	-90.7751	180.916	196.437	236.395	-47.9825	136.195	-5.92848	154.568	-181.406	-123.369	-67.7098	-191.089	79.998	132.695	15.306	154.269			-215.672	-10.5592	19.7154	-164.835	196.555	174.565	-159.546	-261.267	-207.041	178.264	-133.248	-103.705	-66.6775	242.006	-163.358	2.63412	-170.995	16.065	18.4882	204.695	24.1345	-223.722
2.2	-125.602	-192.742	-211.398	121.126	51.5489	210.982	-72.7522	54.3178	99.5663	-91.4873	180.855	198.328	238.206	-47.9263	136.029	-6.132	155.379	-182.793	-123.416	-67.8218	-191.12	80.6166	133.209	14.9315	155.839			-217.416	-10.6646	19.1509	-165.922	196.979	175.829	-159.399	-261.185	-208.657	178.454	-133.768	-105.029	-66.637	241.686	-164.87	4.02636	-172.875	16.0711	17.8198	206.266	24.5623	-225.333
2.21	-125.563	-194.559	-212.035	120.97	51.6709	211.448	-73.2529	54.5861	99.542	-92.3364	181.513	198.874	238.312	-48.6888	136.413	-6.55092	155.452	-182.895	-124.292	-68.0219	-192.669	80.517	134.272	16.1863	156.405			-217.605	-10.8438	18.5628	-166.228	199.195	176.62	-161	-263.48	-209.019	178.688	-135.653	-105.446	-66.9115	244.194	-165.032	3.35964	-173.202	16.2193	16.4653	206.795	22.9336	-225.999
2.22	-126.47	-194.644	-212.426	120.515	51.467	211.519	-73.4364	54.8243	99.4838	-93.9721	181.567	199.351	240.451	-48.993	136.456	-5.68848	156.035	-184.596	-124.449	-68.2807	-192.657	81.0359	134.755	16.3724	157.638			-219.824	-10.9685	18.1229	-168.733	198.672	177.546	-161.184	-263.693	-210.405	179.222	-136.14	-105.912	-66.717	243.851	-166.861	2.93352	-175.505	16.5366	16.3736	207.106	23.2421	-226.787
2.23	-126.239	-196.601	-213.721	120.683	51.689	211.741	-73.6465	54.7529	99.3883	-94.2271	182.152	201.21	240.583	-49.1363	136.879	-4.57116	156.01	-185.066	-125.086	-68.5633	-193.775	80.773	135.918	16.7664	158.245			-219.588	-11.2145	17.4376	-168.342	201.483	178.758	-162.533	-265.251	-211.49	179.358	-137.057	-107.207	-66.9278	245.487	-167.015	3.63156	-175.343	16.3823	14.612	209.531	22.2035	-227.912
2.24	-127.288	-196.678	-214.813	120.076	52.1591	212.006	-74.0063	54.7481	99.4564	-96.2334	181.921	200.676	242.581	-49.8275	136.981	-4.82088	156.641	-186.589	-125.188	-68.815	-195.099	80.9995	136.312	17.5422	159.568			-222.273	-11.375	16.9632	-171.071	201.705	180.01	-164.005	-265.849	-211.957	180.026	-137.491	-106.976	-66.6437	245.638	-168.686	3.17748	-177.684	17.008	14.8944	208.804	20.8541	-227.935
2.25	-127.11	-198.282	-216.005	120.197	51.9232	212.075	-73.8942	54.8855	99.223	-96.5537	182.782	202.966	243.073	-49.6312	137.379	-4.28844	156.514	-186.955	-125.875	-69.163	-194.531	81.3979	137.535	17.7104	160.728			-221.774	-11.3717	17.2154	-170.877	201.995	180.899	-163.685	-267.687	-213.53	180.132	-138.853	-108.514	-66.7499	246.424	-168.86	2.12592	-177.426	16.7322	12.2412	211.082	21.3938	-229.815
2.26	-127.99	-198.519	-216.445	119.699	51.9119	212.842	-74.2355	55.0456	99.1081	-98.0036	182.403	202.623	244.595	-51.0295	137.349	-3.41316	157.011	-188.116	-125.954	-69.3892	-196.6	81.2362	137.924	18.0196	161.525			-224.457	-11.5639	16.5269	-172.735	203.619	182.672	-165.876	-268.486	-213.945	180.713	-138.776	-108.433	-66.6472	247.228	-170.488	2.10588	-179.952	17.3464	12.8239	211.683	19.4892	-229.748
2.27	-127.941	-200.299	-217.705	119.262	51.9502	212.749	-74.3737	54.8575	99.1439	-99.1308	183.604	203.738	245.513	-50.8969	137.741	-3.67332	157.047	-188.651	-126.358	-69.7192	-196.842	82.2726	139.391	18.5921	163.209			-224.2	-11.6539	16.7882	-173.643	204.219	183.076	-166.018	-270.049	-214.935	181.309	-140.728	-108.972	-66.5255	247.37	-170.66	2.1948	-179.538	16.9819	10.5449	211.954	19.152	-232.428
2.28	-128.676	-200.488	-218.647	119.155	52.0602	213.742	-74.3502	54.8921	98.8948	-99.5938	183.451	205.755	246.137	-52.3417	137.808	-3.72816	157.496	-189.818	-126.651	-69.9978	-197.054	82.1382	139.828	18.5674	163.506			-226.618	-11.8648	16.1376	-174.516	204.587	185.154	-166.925	-271.621	-215.566	181.613	-140.61	-110.244	-66.7109	248.654	-172.297	1.51248	-182.21	17.6681	10.312	214.405	18.8598	-232.036
2.29	-128.823	-201.973	-219.95	118.705	51.9976	213.67	-74.5456	55.073	98.7619	-100.954	184.816	204.863	247.71	-52.2817	138.199	-2.2188	157.504	-190.202	-126.704	-70.1278	-199.219	83.1748	141.08	19.7952	164.838			-226.92	-12.0287	16.2952	-175.853	207.133	185.418	-167.812	-272.138	-216.379	181.965	-142.618	-109.871	-66.2569	248.707	-172.506	1.17504	-181.733	17.3122	9.09576	213.494	17.131	-234.901
2.3	-129.176	-202.138	-220.582	118.668	52.4107	214.743	-74.6771	54.472	98.6718	-101.353	184.713	207.088	248.071	-53.4515	138.457	-1.89204	158.022	-191.371	-126.804	-70.9936	-198.777	82.8721	141.248	19.2553	165.367			-228.521	-12.2633	15.3659	-176.195	206.828	187.216	-168.335	-273.782	-217.678	182.445	-142.555	-110.048	-66.5869	250.44	-174.142	1.19676	-184.563	17.8476	7.66488	214.9	17.2357	-234.64
2.31	-129.283	-203.823	-221.009	118.406	52.1788	215.081	-74.6078	54.5759	98.707	-102.427	186.056	207.972	249.75	-53.5874	138.783	-2.15868	157.89	-191.874	-127.047	-71.476	-199.998	83.9357	142.822	20.7707	166.416			-229.661	-12.2412	14.8465	-177.874	207.477	188.032	-169.68	-273.898	-218.358	182.914	-144.686	-110.519	-66.1195	250.562	-174.268	1.32948	-184.258	17.6664	7.752	216.471	16.1058	-237.224
2.32	-129.734	-204.029	-221.958	118.279	52.3385	215.652	-74.9581	53.9548	98.724	-102.982	185.803	208.465	249.974	-54.4132	139.05	-1.44732	158.454	-192.863	-126.849	-71.4844	-200.751	83.8507	142.941	20.9722	166.867			-230.467	-12.3685	14.2164	-178.007	209.622	189.278	-169.374	-276.473	-219.144	183.276	-144.433	-110.422	-66.428	253.27	-175.739	1.89984	-186.654	18.087	5.00904	215.722	15.68	-236.936
2.33	-129.985	-205.625	-222.797	118.078	52.1203	216.384	-74.6833	54.0746	99.0731	-103.905	187.43	209.749	251.761	-54.4045	139.562	-1.8654	158.231	-193.44	-127.041	-72.8171	-200.759	84.4184	144.553	21.4456	168.846			-231.824	-12.5192	13.7617	-180.015	209.202	190.539	-171.434	-276.282	-220.997	183.787	-146.806	-110.818	-65.9172	252.838	-176.027	1.81284	-186.706	17.9946	5.59536	217.579	15.0678	-238.964
2.34	-130.356	-205.988	-223.766	117.831	52.1051	216.561	-74.983	52.9048	99.3522	-105.456	187.316	210.031	252.175	-55.3949	139.884	-1.317	159.156	-194.316	-126.785	-72.7873	-201.968	84.9169	144.459	22.798	168.883			-232.124	-12.7168	12.9376	-179.622	210.937	191.051	-171.174	-278.954	-220.541	184.268	-146.536	-110.467	-66.2273	255.898	-177.431	0.97392	-188.701	18.1056	3.12336	217.848	14.3188	-239.997
2.35	-130.744	-207.626	-224.561	117.76	52.1683	217.779	-74.8552	53.1791	100.54	-105.882	188.462	211.801	253.604	-55.1045	140.527	-0.786	158.757	-194.979	-126.791	-73.9499	-202.26	85.0049	146.536	22.692	170.988			-233.841	-12.7049	12.403	-181.962	212.594	193.073	-172.958	-278.714	-221.935	184.362	-148.585	-110.923	-65.8825	255.472	-177.762	0.96252	-189.12	18.2126	2.83764	218.532	13.6535	-240.681
2.36	-130.958	-207.857	-225.816	117.399	52.1948	217.771	-74.9225	51.9437	101.137	-107.54	188.929	212.032	254.49	-56.496	141.35	-1.5576	159.488	-195.818	-126.712	-74.712	-202.531	85.5377	146.597	23.6946	171.391			-233.75	-12.9191	11.3231	-181.47	212.488	193.145	-173.552	-281.428	-222.175	184.679	-148.485	-110.601	-66.003	257.856	-179.293	0.85836	-189.715	18.2822	1.5624	219.696	13.4329	-242.459
2.37	-131.681	-209.319	-225.76	117.526	52.3013	219.297	-75.2276	51.6074	101.86	-108.11	189.051	213.654	255.512	-56.3394	141.523	-0.8706	159.632	-196.817	-126.536	-75.209	-204.409	85.6458	148.078	24.2116	172.388			-236.048	-13.179	11.2997	-183.708	215.299	195.436	-173.963	-281.286	-223.184	184.848	-149.397	-110.993	-65.8622	258.299	-179.552	2.09664	-190.867	18.6434	0.35412	219.967	11.9488	-242.66
2.38	-131.758	-209.78	-228.228	117.156	52.2125	219.25	-74.8717	51.232	102.669	-109.12	189.608	214.21	256.8	-57.6995	142.965	-0.0366	160.193	-197.48	-126.714	-76.5522	-203.641	86.0089	148.251	24.358	173.107			-235.78	-13.4224	9.63108	-183.533	215.054	195.541	-175.594	-283.043	-224.313	185.14	-149.967	-110.948	-65.7329	259.656	-181.589	2.37876	-191.157	18.3412	0.13152	221.029	12.242	-244.71
2.39	-132.574	-211.144	-227.605	117.131	52.2166	220.61	-75.3625	50.6063	102.947	-110.674	190.106	215.084	257.083	-57.852	142.915	-1.20216	160.633	-198.769	-126.642	-76.2392	-205.94	86.222	149.788	25.5725	174.892			-238.363	-13.6914	9.73128	-185.812	215.47	197.561	-175.432	-283.675	-224.709	185.625	-151.257	-111.129	-65.7581	260.465	-181.717	1.68168	-192.565	18.9176	-2.5788	221.251	10.6777	-244.966
2.4	-132.51	-211.668	-229.799	116.894	51.9193	220.91	-75.0976	50.4894	103.842	-110.809	190.428	216.781	259.216	-58.9201	144.31	-0.88596	160.969	-199.104	-126.56	-78.205	-206.503	86.2926	150.01	25.7452	174.966			-237.987	-13.6723	8.4216	-185.508	217.292	198.179	-177.254	-284.637	-226.284	185.551	-151.819	-111.581	-65.7443	261.159	-183.3	1.38132	-192.891	18.4888	-1.96824	222.224	10.4554	-246.112
2.41	-133.418	-212.821	-229.407	116.766	52.2943	222.016	-75.5135	49.9056	104.233	-112.823	190.616	216.527	259.342	-59.3468	144.213	-0.09384	161.443	-201.075	-126.224	-77.8128	-206.942	86.4817	151.461	26.698	177.073			-240.507	-13.9805	8.16348	-187.363	217.172	199.494	-176.971	-285.929	-227.096	186.339	-152.98	-111.303	-65.6125	262.292	-183.372	1.54032	-194.664	19.1024	-4.65432	222.544	10.0805	-246.673
2.42	-133.282	-213.569	-231.209	116.597	52.1267	222.74	-75.4344	49.4849	104.67	-113.198	191.45	218.949	261.232	-60.1896	145.777	-0.72384	161.618	-200.973	-126.324	-79.2322	-207.82	86.7526	151.671	27.0332	177.205			-240.475	-14.0029	7.335	-188.009	219.043	200.741	-178.868	-286.804	-227.607	186.52	-154.58	-111.968	-65.7598	262.447	-185.089	1.62276	-194.485	18.6041	-4.96344	223.143	9.22968	-247.859
2.43	-134.258	-214.62	-231.034	116.395	51.7738	223.249	-75.6094	48.6887	105.43	-114.465	191.655	218.813	261.473	-60.8336	145.557	-0.09576	162.826	-202.748	-126.063	-79.424	-208.416	86.6669	153.299	27.6301	179.306			-242.572	-14.4136	7.16508	-188.77	220.581	201.448	-178.746	-288.37	-229.302	186.946	-154.711	-111.73	-65.6045	263.711	-185.129	1.09416	-197.227	18.898	-6.19512	223.675	9.37188	-248.131
2.44	-134.007	-215.106	-233.105	116.209	51.5908	224.368	-75.9137	48.2719	105.738	-115.705	192.739	220.441	263.058	-61.3973	147.407	0.30552	162.552	-202.971	-125.651	-80.2115	-208.276	87.0859	153.562	28.4743	179.396			-243.026	-14.2757	6.1476	-190.352	220.068	203.299	-179.744	-289.334	-229.877	187.484	-156.759	-112.061	-65.9022	263.477	-187.064	1.55412	-196.761	18.6358	-7.88532	224.214	8.77044	-250.089
2.45	-134.785	-216.779	-232.832	116.015	51.8761	224.771	-75.7166	47.5912	106.414	-115.927	192.916	220.903	263.725	-62.3155	147.149	-0.57852	164.196	-204.44	-125.659	-80.8135	-210.652	87.1337	154.82	28.5888	180.958			-243.912	-14.7431	5.9046	-190.391	222.371	203.652	-180.732	-290.437	-230.939	187.652	-156.997	-112.138	-65.8486	265.141	-187.098	1.16184	-199.227	18.4406	-7.72512	224.771	7.60884	-250.299
2.46	-134.957	-216.892	-234.717	115.857	51.2629	225.972	-76.2982	47.3852	106.961	-117.807	193.37	221.582	265.185	-62.5958	148.834	-0.56016	163.919	-204.702	-125.069	-81.346	-210.058	87.7165	155.384	29.5634	181.58			-245.069	-14.5363	5.06724	-192.438	222.885	205.772	-181.175	-291.227	-232.206	188.099	-157.792	-112.133	-66.021	264.723	-188.814	0.71316	-199.143	18.482	-10.477	225.433	7.7964	-252.347
2.47	-135.483	-218.792	-234.563	115.704	51.8459	226.17	-76.3394	46.635	107.257	-118.395	194.138	224.035	265.958	-63.9683	148.486	0.60348	165.466	-206.121	-125.087	-82.0322	-211.363	88.086	156.326	29.4324	183.157			-245.311	-14.8138	4.79808	-192.036	223.303	205.969	-182.447	-292.475	-232.635	188.284	-158.464	-112.783	-66.0394	267.211	-188.798	0.26688	-200.985	17.9149	-9.85776	225.784	7.01556	-253.079
2.48	-136.001	-218.886	-236.404	115.378	51.4732	227.318	-76.4677	46.8121	107.832	-119.356	194.513	223.349	267.228	-63.9866	150.169	0.35412	165.731	-206.535	-124.601	-81.8801	-213.142	88.5509	157.024	30.4825	183.64			-246.8	-14.7564	4.08072	-194.38	225.029	208.087	-182.428	-292.965	-234.406	188.459	-159.013	-112.579	-66.1254	266.889	-190.494	0.08784	-201.551	18.0788	-12.445	226.256	6.03972	-254.159
2.49	-136.393	-220.853	-237.005	115.313	51.7796	227.427	-77.0683	45.8485	108.015	-121.068	195.851	225.908	268.2	-65.173	149.859	0.55248	166.698	-208.139	-124.452	-83.386	-213.09	89.2211	157.769	30.6077	185.311			-247.011	-15.0881	3.46152	-194.051	224.52	208.145	-184.295	-294.964	-234.732	188.76	-160.666	-113.079	-66.272	269.627	-190.475	0.9	-202.719	17.4234	-12.6737	227.492	6.67116	-256.112
2.5	-137.152	-220.995	-237.615	114.829	52.0758	228.51	-77.0213	45.8303	108.224	-121.36	195.795	226.527	269.165	-65.1175	151.704	1.98588	167.693	-208.544	-124.329	-82.5906	-214.213	89.592	158.614	30.8952	185.763			-248.719	-15.0313	3.42744	-196.566	227.144	210.528	-184.091	-295.068	-235.898	188.785	-160.562	-113.229	-66.1954	269.209	-192.086	1.04304	-203.966	17.6869	-14.0093	227.359	5.31516	-256.282
2.51	-137.281	-222.628	-239.635	114.9	52.035	228.705	-77.8088	44.4458	108.359	-123.367	197.449	226.836	270.723	-66.1453	151.43	0.81804	168.044	-209.919	-124.17	-83.9011	-215.245	89.9732	159.318	31.9394	187.139			-248.607	-15.2636	2.96316	-196.241	227.858	210.786	-185.665	-297.705	-237.378	188.954	-162.355	-113.218	-66.3966	272.155	-192.189	0.81144	-204.365	17.0246	-15.5431	228.996	5.29824	-257.655
2.52	-138.783	-223.275	-239.481	114.308	52.1952	229.461	-77.5912	44.4221	108.58	-124.242	197.106	229.334	270.928	-66.1768	153.049	0.96744	169.372	-210.339	-124.078	-83.6698	-215.313	90.3938	160.139	31.5064	187.777			-251.065	-15.1291	2.76648	-198.356	228.371	212.856	-185.981	-297.525	-237.492	189.104	-162.477	-113.774	-66.2036	271.809	-193.671	0.47076	-206.13	17.24	-15.6854	228.902	4.773	-257.866
2.53	-138.529	-224.04	-241.617	114.34	52.21	229.65	-78.1822	43.78	108.67	-125.331	198.252	228.693	272.746	-66.8824	152.996	2.19096	169.348	-211.591	-124.006	-83.0438	-216.324	90.6948	160.736	32.6638	188.955			-250.682	-15.0961	2.27136	-198.682	230.334	213.332	-187.003	-298.994	-239.298	189.113	-163.195	-113.488	-66.4919	274.529	-193.814	0.18216	-206.146	16.6996	-17.863	229.815	4.34232	-259.449
2.54	-140.176	-225.154	-241.296	113.852	51.5695	230.185	-78.757	43.224	108.656	-127.056	198.648	230.866	272.795	-66.9208	154.448	1.7652	170.946	-212.083	-123.897	-83.8055	-216.513	91.1494	161.643	32.5958	189.372			-253.556	-15.2189	2.17188	-200.098	230.271	214.908	-188.285	-299.518	-239.99	189.071	-163.871	-113.987	-66.1578	274.846	-195.198	0.102	-208.137	16.8583	-17.5087	230.689	3.98832	-259.213
2.55	-139.941	-225.935	-243.775	113.596	52.254	230.491	-78.6091	42.634	108.593	-127.18	199.347	232.051	274.826	-67.5569	154.374	1.86408	170.805	-213.205	-124.125	-83.3591	-217.551	91.3945	162.023	32.9339	191.502			-253.168	-15.3838	1.1982	-201.295	231.052	216.12	-188.294	-301.077	-240.954	189.074	-164.416	-114.287	-66.4327	276.868	-195.398	-0.8388	-207.972	16.4096	-20.0695	230.19	3.25068	-261.214
2.56	-141.573	-227.052	-243.785	113.41	51.6929	230.86	-79.6033	42.1302	108.123	-129.289	200.436	231.958	275.114	-67.6387	155.542	2.30196	172.368	-213.95	-123.984	-83.459	-218.042	91.6433	163.218	33.5033	191.605			-255.644	-15.6176	1.12596	-201.612	232.277	217.261	-189.99	-301.632	-242.553	189.051	-165.438	-114.187	-66.1826	277.708	-196.852	-0.92628	-210.041	16.3958	-19.4852	232.385	3.08292	-261.056
2.57	-141.51	-226.987	-245.299	112.944	51.9062	231.038	-79.2071	41.3942	108.062	-129.909	200.895	234.402	276.769	-68.1671	155.517	2.03328	172.207	-215.01	-124.382	-83.7815	-218.949	91.8438	163.363	33.6742	193.521			-255.624	-15.1415	0.33432	-203.598	232.101	218.968	-189.758	-303.598	-242.975	189.04	-165.87	-114.715	-66.3778	279.385	-196.909	-1.5252	-209.981	16.1996	-21.903	232.76	2.307	-263.591
2.58	-142.891	-228.744	-245.627	112.992	51.7811	231.249	-80.2644	41.2951	107.393	-131.171	201.853	233.961	277.598	-68.3975	156.649	2.37228	173.944	-215.614	-124.35	-83.3815	-220.924	92.003	164.742	34.2014	193.848			-257.728	-15.7924	0.56448	-203.599	234.141	219.567	-191.594	-304.313	-244.428	189.034	-166.956	-114.693	-66.1776	280.185	-198.489	-2.6868	-212.121	16.1228	-22.3528	234.361	1.15716	-263.359
2.59	-143.01	-228.749	-247.19	112.218	51.5863	231.294	-80.3436	40.509	106.661	-132.786	202.254	235.829	278.96	-68.5681	156.694	2.31912	173.782	-216.604	-124.806	-83.8235	-220.202	92.2289	165.388	34.3711	195.192			-257.983	-15.8293	-0.52608	-205.494	233.692	222.019	-191.81	-305.574	-245.69	189.003	-167.382	-114.87	-66.2999	281.831	-198.48	-3.1146	-211.809	16.0026	-23.1307	234.725	1.5426	-266.148
2.6	-143.996	-229.77	-247.737	112.475	52.037	231.348	-80.4007	40.6896	106.446	-133.12	203.367	236.564	279.988	-69.0395	157.743	2.46288	175.161	-217.228	-125.488	-83.4702	-222.859	92.2897	166.481	34.8386	195.563			-259.479	-15.7987	-0.57324	-205.436	236.077	222.116	-192.292	-306.511	-246.215	188.986	-168.795	-115.104	-66.1028	282.775	-200.352	-2.54604	-214.146	15.9077	-25.6519	235.814	0.15708	-265.829
2.61	-144.459	-229.861	-248.851	111.185	52.5727	230.966	-81.3272	40.1282	105.568	-135.267	203.245	236.919	281.003	-68.9162	157.808	3.28692	175.287	-218.046	-125.179	-83.6866	-223.447	92.603	167.021	35.5801	197.385			-260.194	-15.6895	-1.28304	-207.588	236.928	224.851	-194.043	-306.878	-247.833	188.889	-169.071	-115.17	-66.3019	283.797	-200.177	-2.92836	-213.901	15.9702	-25.012	236.446	-0.39084	-268.678
2.62	-144.88	-231.681	-249.86	111.67	52.4587	231.055	-80.9096	39.737	105.078	-135.789	204.45	239.453	282.666	-69.4608	158.667	2.6982	175.827	-218.754	-126.223	-83.8415	-224.043	92.593	168.149	35.3131	198.397			-260.917	-15.8872	-1.53888	-207.381	237.4	224.892	-193.987	-308.594	-248.669	188.876	-170.135	-115.484	-65.9856	285.049	-202.223	-2.70756	-215.156	15.8354	-27.841	237.483	-0.20508	-268.245
2.63	-146.292	-232.701	-250.842	110.509	53.0346	230.436	-81.8185	39.5014	104.649	-137.122	204.544	238.777	282.958	-69.0679	159.001	2.77044	176.063	-219.522	-126.639	-83.65	-225.279	93.1511	168.62	36.7706	199.521			-262.72	-14.9628	-1.97964	-209.729	238.695	227.701	-195.466	-308.776	-249.391	189.021	-170.636	-115.497	-66.0685	285.59	-202.18	-3.04728	-215.588	16.1012	-28.3486	238.028	-0.92412	-271.139
2.64	-146.387	-233.357	-251.916	110.806	52.8811	230.428	-81.412	38.721	103.782	-138.736	205.641	241.096	285.153	-69.6017	159.523	3.25752	176.844	-220.234	-126.77	-84.2015	-225.663	92.7101	170.013	36.6995	201.106			-262.884	-14.9698	-2.22336	-209.51	239.159	227.715	-195.443	-311.222	-251.037	188.915	-171.566	-115.829	-65.5126	287.247	-204.086	-3.7524	-216.811	15.7798	-29.0765	238.649	-1.21284	-271.009
2.65	-147.623	-233.556	-252.909	109.976	53.2253	230.125	-82.2414	38.8224	103.52	-139.056	205.873	242.072	285.272	-69.224	159.925	2.02452	176.776	-221.189	-127.588	-83.9207	-226.478	93.4144	170.228	36.9643	201.792			-264.847	-14.5594	-2.56164	-211.283	240.133	230.193	-196.933	-311.363	-251.391	188.999	-172.09	-116.022	-65.7739	287.273	-204.085	-3.07836	-217.112	16.1466	-31.1573	239.784	-1.14216	-272.342
2.66	-147.723	-234.038	-253.97	110.091	53.4684	229.937	-81.9727	38.1096	102.875	-141.076	206.719	242.296	287.627	-69.9632	160.398	3.123	177.886	-221.972	-127.468	-84.6103	-227.849	93.3444	171.814	37.9349	203.684			-264.822	-15.0722	-2.74512	-211.698	241.385	230.296	-196.868	-313.039	-252.642	188.885	-173.031	-116.069	-64.9453	289.736	-205.931	-2.3832	-218.79	15.8502	-30.5118	239.595	-1.85532	-273.388
2.67	-148.922	-234.805	-254.921	109.587	53.6884	229.968	-82.426	38.0969	102.442	-141.573	207.996	244.771	287.714	-69.7085	160.803	4.51452	177.669	-222.578	-128.265	-84.3373	-227.83	93.9242	171.853	37.933	204.032			-266.932	-14.6618	-3.2664	-213.005	241.639	232.498	-198.107	-313.349	-253.729	188.797	-174.566	-116.505	-65.0708	289.448	-206.589	-2.48364	-218.792	16.3171	-33.1703	240.94	-1.45092	-273.86
2.68	-148.991	-235.339	-255.961	109.465	54.5652	229.91	-82.7044	37.2829	102.237	-142.748	207.845	244.113	289.798	-70.7281	161.21	3.24636	179.017	-223.387	-128.236	-85.0649	-230.215	94.0786	173.377	38.1359	205.344			-266.64	-14.6158	-3.54468	-213.786	243.838	233.166	-198.63	-314.908	-254.132	188.732	-174.505	-116.523	-64.3032	292.319	-207.984	-2.28048	-220.636	16.0807	-33.1543	241.134	-2.238	-275.059
2.69	-149.63	-236.409	-256.816	109.036	54.1585	230.042	-82.5463	37.0847	101.813	-144.218	209.327	246.761	290.001	-70.51	161.6	3.75792	178.847	-224.106	-128.686	-84.9924	-229.458	94.749	173.573	38.8552	205.976			-268.361	-14.3053	-3.9378	-214.885	243.45	234.753	-199.428	-315.189	-255.689	188.685	-176.413	-116.984	-64.4898	292.06	-208.794	-3.33912	-220.567	16.5586	-34.1408	242.335	-1.83264	-275.801
2.7	-150.192	-236.903	-258.021	108.784	55.3162	230.192	-83.1728	36.1746	101.741	-144.542	209.602	247.039	291.727	-71.4496	161.877	4.74372	180.195	-224.763	-129.521	-85.4296	-231.905	94.9945	175.185	38.4623	207.525			-268.838	-14.1524	-4.41384	-215.799	246.013	236.127	-200.67	-317.333	-256.552	188.646	-176.589	-117.106	-63.751	294.416	-209.987	-4.28196	-222.679	16.3288	-36.1528	242.522	-2.58312	-277.001
2.71	-150.387	-237.748	-258.645	108.644	55.597	230.278	-82.6506	36.1393	101.581	-146.682	210.058	247.871	292.585	-71.3243	162.32	3.69456	180.371	-225.623	-129.003	-85.746	-232.74	95.3851	175.264	39.2131	207.91			-269.828	-13.6512	-4.39752	-216.665	245.596	236.986	-200.4	-317.545	-257.213	188.837	-177.383	-117.341	-63.5844	294.398	-210.538	-3.86964	-222.792	16.7845	-35.8217	243.462	-2.87688	-277.456
2.72	-150.876	-238.625	-260.217	108.219	55.8674	230.679	-82.6412	35.3786	101.64	-147.209	210.685	250.228	293.372	-72.4694	162.677	4.8504	181.193	-226.548	-130.472	-85.9255	-233.219	96.1451	177.28	38.8541	210.012			-270.729	-13.96	-5.09868	-217.906	247.18	239.016	-202.586	-319.464	-258.907	188.752	-178.468	-117.696	-63.3638	296.647	-211.953	-3.74268	-224.568	16.8833	-37.5874	244.051	-2.98044	-278.945
2.73	-151.283	-239.9	-260.49	108.277	56.438	230.666	-82.7791	34.9858	101.716	-148.278	211.166	249.567	294.745	-72.5084	163.087	5.79564	181.953	-226.833	-130.129	-86.8416	-235.613	96.4526	177.22	39.5234	210.798			-272.038	-13.1252	-4.87476	-218.43	248.25	239.408	-202.539	-320.409	-259.594	188.818	-179.138	-117.674	-62.8331	296.89	-212.129	-3.63984	-225.701	16.8716	-38.0623	244.807	-3.65784	-279.642
2.74	-151.74	-240.381	-262.339	107.775	56.4347	231.108	-82.4237	34.8886	101.849	-149.981	211.662	252.093	295.062	-73.4599	163.48	5.21832	182.328	-228.272	-131.006	-86.7364	-235.109	97.433	178.94	39.436	212.359			-272.916	-13.4707	-5.63964	-219.684	248.471	241.685	-204.192	-320.743	-260.696	188.965	-180.089	-118.021	-63.0062	298.512	-213.851	-3.67296	-226.419	17.4221	-38.5901	245.625	-3.8382	-281.421
2.75	-152.281	-241.717	-262.664	107.731	56.7104	230.982	-82.611	34.1862	102.093	-150.249	212.271	252.57	297.183	-74.0795	163.822	5.2044	183.504	-228.669	-131.494	-87.1774	-237.271	97.3169	179.248	39.6625	213.574			-274.389	-12.6782	-5.31348	-220.326	249.635	241.821	-204.435	-322.753	-262.199	188.958	-180.912	-118.078	-61.9832	299.532	-213.796	-4.60812	-228.331	17.1763	-39.7747	245.111	-4.08	-281.687
2.76	-152.752	-242.404	-264.321	107.172	56.6974	231.572	-82.2724	34.197	102.109	-152.319	212.924	253.057	297.317	-74.5541	164.274	5.97732	183.417	-229.66	-131.851	-88.4654	-237.534	98.3696	180.579	40.3052	214.267			-275.555	-13.0343	-6.20316	-221.565	250.126	244.215	-205.712	-322.868	-262.431	189.072	-181.827	-118.316	-62.1652	300.172	-215.761	-5.11932	-228.311	17.9053	-39.8922	247.1	-4.65504	-283.922
2.77	-153.195	-243.715	-264.603	107.189	56.6431	231.42	-82.4118	33.0773	103.065	-152.95	213.494	255.265	299.202	-76.1062	164.607	5.61264	184.992	-230.339	-132.377	-88.301	-238.083	98.4275	180.982	40.1123	216.414			-276.536	-12.2446	-5.97084	-222.275	250.724	244.258	-206.365	-325.647	-264.642	189.114	-182.595	-118.545	-61.2739	302.328	-215.655	-4.47432	-230.489	17.5414	-40.8004	246.495	-4.47192	-283.823
2.78	-153.871	-244.124	-266.044	106.701	57.2112	232.027	-82.214	33.174	102.935	-153.981	214.473	254.803	299.22	-76.0255	165	5.61156	184.705	-231.264	-132.735	-89.0063	-239.749	98.903	182.069	40.822	216.628			-278.211	-12.6144	-6.69864	-223.539	252.258	246.635	-207.585	-325.383	-264.71	189.251	-183.76	-118.659	-61.4666	302.123	-217.544	-4.88256	-230.268	18.3514	-41.0934	246.307	-5.34384	-285.299
2.79	-154.084	-245.711	-266.84	106.82	56.896	231.943	-82.1461	32.3638	103.563	-155.373	214.866	257.402	301.305	-78.1409	165.283	4.93044	186.323	-231.74	-133.431	-89.8057	-239.448	98.7725	182.727	40.8942	218.974			-278.597	-11.6532	-6.68508	-224.072	252.271	246.854	-208.323	-327.962	-266.18	189.429	-184.218	-118.947	-60.6196	304.406	-217.72	-6.01716	-232.829	17.9412	-42.1151	247.561	-5.26956	-285.788
2.8	-155.08	-246.288	-268.121	106.141	57.7763	232.553	-82.2452	32.0936	103.898	-155.895	215.828	257.006	301.516	-77.7079	165.825	4.4964	186.26	-232.977	-133.916	-89.6384	-241.457	99.3881	183.668	41.1953	219.084			-280.671	-11.8067	-7.25124	-225.573	254.59	248.94	-209.069	-327.885	-267.414	189.388	-185.626	-119.013	-60.7182	304.181	-219.76	-6.17928	-232.525	18.7508	-42.6452	247.053	-5.48112	-287.389
2.81	-155.004	-247.383	-268.488	106.176	57.4768	232.513	-82.1797	31.7202	104	-157.436	216.08	258.726	303.449	-80.0861	165.801	4.58544	187.945	-233.288	-134.045	-91.3615	-242.441	99.2663	184.739	41.4251	221.081			-280.583	-10.9046	-7.34064	-225.86	253.967	249.544	-210.834	-329.497	-267.899	189.686	-185.748	-119.143	-59.9016	306.391	-219.606	-4.69488	-234.869	18.151	-43.5653	247.99	-5.9046	-287.976
2.82	-156.279	-248.023	-270.879	105.583	58.1083	233.138	-82.2955	31.5224	104.51	-157.985	217.103	260.557	304.026	-79.9903	166.525	4.13808	187.786	-234.505	-134.348	-92.0347	-242.799	99.9338	185.316	41.9398	221.448			-283.154	-10.8235	-8.29884	-227.725	256.303	251.326	-210.398	-330.05	-269.429	189.927	-187.069	-119.287	-59.9389	306.169	-222.215	-5.031	-234.864	18.9272	-44.5669	248.748	-6.11244	-289.531
2.83	-156.049	-248.924	-270.518	105.554	58.512	233.365	-82.6435	30.9272	104.791	-159.17	217.331	259.838	305.383	-81.9338	166.442	3.43224	189.14	-234.709	-134.658	-92.2745	-245.572	99.9326	186.796	41.8648	222.971			-282.713	-10.2314	-8.11392	-227.933	257.028	252.56	-213.226	-331.572	-270.395	190.064	-187.238	-119.378	-59.6045	308.21	-222.057	-6.58512	-236.261	18.3229	-44.9582	248.703	-7.01784	-290.09
2.84	-157.295	-249.936	-273.083	104.91	58.5964	233.626	-82.5662	30.7043	105.055	-159.866	218.276	262.565	306.603	-81.8771	167.178	3.06564	189.367	-235.923	-135.082	-94.1423	-244.763	100.898	187.171	42.5233	223.429			-285.27	-9.9786	-9.23268	-229.962	257.256	253.506	-212.94	-332.279	-270.908	190.353	-188.326	-119.383	-59.3196	308.015	-224.391	-7.6368	-236.762	19.0703	-46.615	249.42	-6.52272	-291.675
2.85	-157.122	-251.02	-272.766	104.883	59.2703	234.115	-82.9634	29.8595	105.469	-160.825	218.25	263.691	307.338	-83.913	167.03	3.40044	190.036	-236.318	-135.305	-94.0423	-246.85	101.096	188.834	42.5168	225.337			-285.139	-9.1806	-9.399	-229.848	260.265	255.708	-214.596	-334.187	-272.574	190.645	-188.497	-119.434	-59.0537	309.859	-224.366	-7.44564	-237.45	18.473	-46.6861	249.759	-7.5588	-292.375
2.86	-158.293	-251.877	-275.027	104.533	59.1763	234.173	-83.2753	29.6477	105.771	-162.277	219.783	263.677	308.889	-83.7203	168.098	2.74572	190.743	-237.18	-136.053	-95.9965	-248.192	101.741	189.144	43.1154	226.415			-287.316	-8.90472	-10.0594	-232.146	260.182	256.079	-215.729	-334.488	-273.128	190.694	-190.2	-119.48	-58.7518	310.085	-226.297	-7.5642	-237.672	19.0464	-48.4579	250.073	-7.91844	-293.382
2.87	-158.306	-252.769	-275.041	104.352	59.5008	234.572	-83.2696	28.8718	106.151	-162.814	219.903	266.408	309.564	-85.3886	167.719	2.38584	190.91	-237.896	-136.014	-95.8186	-248.194	102.564	190.92	43.1644	227.498			-287.415	-8.30124	-10.3601	-231.762	260.907	258.406	-215.907	-336.203	-274.426	190.867	-190.339	-119.494	-58.3537	310.872	-226.36	-8.54316	-239.718	18.7699	-48.3964	250.48	-7.96932	-294.966
2.88	-159.303	-253.999	-277.029	104.124	59.385	234.681	-83.7167	28.0667	106.538	-163.992	220.877	266.128	311.433	-85.4569	169.25	2.15256	191.106	-238.899	-136.992	-97.0784	-249.776	102.952	191.002	43.7846	228.654			-289.299	-8.0454	-10.8414	-234.272	262.185	258.631	-218.03	-336.959	-276.052	190.955	-191.436	-119.29	-58.1004	311.673	-228.288	-8.17068	-239.997	19.2796	-50.4232	250.657	-8.853	-295.057
2.89	-159.53	-254.526	-277.014	103.926	59.7322	234.973	-83.9334	27.9794	106.78	-165.509	221.871	268.244	311.868	-86.4481	168.903	1.90788	191.795	-239.464	-136.769	-97.8505	-250.389	104.316	192.693	43.6194	229.681			-289.816	-7.5792	-11.2688	-233.749	262.174	261.141	-217.435	-337.578	-276.358	191.112	-192.583	-119.392	-57.7603	311.706	-228.305	-7.69956	-241.894	19.0404	-50.1773	251.195	-8.79612	-297.052
2.9	-160.068	-256.021	-279.005	103.597	59.798	235.091	-83.8688	26.8964	107.288	-165.855	222.354	268.944	313.805	-87.4054	170.659	0.603	191.756	-240.655	-137.538	-98.2825	-250.833	104.5	192.787	44.2363	230.546			-290.923	-7.36416	-11.7888	-236.019	263.089	261.213	-218.451	-339.336	-278.558	191.163	-192.745	-119.352	-57.5983	312.765	-230.127	-9.4602	-242.517	19.0804	-52.1968	251.498	-9.2982	-296.824
2.91	-160.805	-256.149	-279.331	103.403	60.104	235.172	-83.9198	27.277	107.477	-167.772	223.349	269.704	314	-87.759	170.191	0.8274	192.578	-240.878	-137.591	-99.4519	-252.709	105.768	194.339	44.7268	231.623			-292.137	-6.98652	-12.1403	-236.715	265.2	263.592	-219.104	-339.064	-278.953	191.314	-194.044	-119.297	-57.2666	312.67	-230.043	-9.21396	-244.556	18.9533	-52.6792	251.786	-10.0542	-298.16
2.92	-160.986	-257.811	-280.89	103.197	60.0788	235.293	-84.2998	26.1594	107.866	-168.466	223.878	271.864	316.257	-89.2384	171.79	1.21512	192.707	-242.263	-137.932	-99.3842	-252.495	106.108	194.607	44.5613	233.277			-292.637	-6.74004	-12.6577	-237.309	264.745	263.987	-219.656	-341.628	-280.512	191.369	-194.187	-119.332	-57.1024	313.975	-231.714	-7.83432	-245.097	18.645	-53.5733	252.272	-10.3067	-298.294
2.93	-161.864	-258.285	-281.286	102.756	60.5387	235.304	-84.298	26.3165	108.454	-169.416	224.788	271.38	316.129	-89.5157	171.591	-0.00312	193.679	-242.817	-138.328	-100.937	-254.897	106.876	196.167	45.5491	233.707			-294.053	-6.18504	-12.9889	-239.436	267.278	265.885	-220.808	-341.427	-281.738	191.358	-195.269	-119.233	-56.6539	314.099	-232.054	-8.67708	-246.899	18.8761	-54.9322	252.681	-11.0015	-299.228
2.94	-161.922	-259.834	-282.915	102.551	60.2284	235.37	-84.6198	25.3432	108.637	-171.186	225.153	273.98	318.446	-91.114	172.885	-1.46208	193.873	-243.746	-138.196	-100.514	-254.401	107.693	196.397	45.1958	235.531			-294.327	-6.02604	-13.4436	-239.194	267.366	266.984	-220.948	-344.207	-282.12	191.322	-195.229	-119.086	-56.5834	315.553	-233.153	-9.50784	-247.187	18.4066	-54.9684	253.204	-10.9414	-299.39
2.95	-163.011	-259.838	-283.918	102.145	60.6086	235.428	-84.8388	25.3362	109.299	-171.561	226.55	274.005	318.256	-91.4498	172.985	-1.27188	194.962	-244.674	-139.047	-102.294	-256.809	108.442	197.897	45.8879	235.834			-295.686	-5.7522	-13.7892	-241.571	268.412	268.191	-222.994	-343.886	-283.97	191.379	-196.866	-119.176	-56.2986	315.765	-233.661	-10.2664	-248.874	18.6066	-57.291	253.7	-11.7876	-300.711
2.96	-163.004	-261.692	-284.273	101.891	60.7523	235.331	-84.9475	24.2782	109.663	-173.264	226.549	275.376	320.653	-92.9687	174.537	-1.61928	195.092	-245.576	-138.681	-101.858	-256.847	109.19	198.216	45.8126	237.07			-295.8	-5.7552	-13.9086	-241.14	269.602	269.404	-222.736	-346.496	-284.564	191.345	-196.537	-119.074	-56.3602	317.36	-235.041	-10.0487	-249.1	18.1852	-56.792	254.152	-11.4821	-300.739
2.97	-164.613	-261.821	-286.385	101.634	60.8633	235.48	-85.0757	24.3314	110.04	-174.404	228.15	276.948	320.957	-93.0611	174.439	-2.72268	196.502	-246.649	-139.552	-103.34	-258.164	109.783	199.503	46.291	237.52			-297.88	-5.38056	-14.5691	-243.416	269.999	270.482	-225.118	-346.986	-285.663	191.488	-198.722	-118.983	-55.9484	317.319	-235.289	-10.7435	-250.484	18.1622	-58.9151	254.697	-12.157	-302.581
2.98	-164.589	-263.715	-286.054	101.364	61.1574	235.262	-85.0714	23.8909	111.047	-174.929	228.078	276.643	322.813	-94.5982	176.124	-2.61216	196.75	-247.371	-139.623	-103.164	-259.535	110.283	200.055	46.4378	239.572			-298.045	-5.43684	-14.0862	-243.044	270.935	272.165	-225.074	-347.699	-286.893	191.428	-198.358	-119.017	-55.9597	319.397	-236.725	-10.4872	-250.84	17.9188	-59.2134	254.998	-12.6743	-302.472
2.99	-166.04	-263.762	-287.662	101.055	61.3325	235.402	-85.1671	23.2812	111.182	-176.955	229.446	279.409	323.556	-94.7144	176.301	-3.83076	198.053	-248.247	-140.068	-104.055	-259.798	110.801	201.143	46.6958	239.719			-300.004	-5.15208	-15.0296	-245.163	272.103	272.634	-226.579	-349.147	-287.182	191.496	-200.034	-118.707	-55.7654	319.476	-237.035	-10.7924	-252.114	17.6702	-59.9585	255.835	-12.6007	-304.585
3	-165.943	-265.383	-288.248	100.726	61.4741	234.289	-85.179	22.9504	112.227	-177.343	229.693	279.19	324.996	-96.2966	177.809	-5.77656	198.983	-248.976	-140.842	-104.488	-260.875	111.199	201.759	47.0915	241.593			-299.848	-5.23308	-14.444	-244.93	272.133	274.612	-228.143	-349.73	-289.141	191.551	-201.031	-118.781	-55.6625	321.895	-238.422	-11.5706	-253.153	17.6254	-61.4874	256.062	-13.3423	-304.564
3.01	-167.184	-265.892	-288.768	100.485	61.5767	234.322	-85.1573	22.1366	112.533	-178.92	230.145	280.56	326.371	-96.0376	178.254	-5.21628	199.757	-249.803	-140.612	-104.198	-261.541	111.589	202.739	47.1917	242.015			-301.697	-4.81092	-15.0868	-246.632	274.619	274.79	-228.108	-351.676	-289.745	191.625	-201.043	-118.726	-55.5216	321.654	-238.803	-11.777	-254.168	17.1493	-61.2428	257.083	-13.3962	-306.644
3.02	-167.65	-267.168	-289.757	100.275	61.268	232.859	-85.3468	22.0038	113.775	-180.535	231.181	282.52	326.977	-97.1281	179.485	-7.11168	200.755	-250.6	-142.128	-105.31	-262.011	111.941	203.72	47.4672	243.512			-302.331	-4.88184	-14.2249	-247.096	274.032	276.985	-230.3	-351.99	-291.054	191.716	-202.619	-118.479	-55.4815	324.225	-239.937	-12.0444	-255.423	17.2426	-63.4366	257.887	-13.7618	-306.479
3.03	-168.329	-267.71	-289.923	100.065	61.5592	232.975	-85.0742	21.1704	112.795	-181.073	231.237	281.768	329.076	-97.1981	180.098	-7.9986	201.159	-251.476	-141.628	-104.641	-263.971	112.195	204.358	47.7126	243.88			-303.453	-4.5282	-14.8358	-248.438	275.997	277.125	-229.921	-354.478	-291.552	191.798	-202.231	-118.591	-55.2976	324.42	-240.416	-12.4026	-256.131	16.6246	-63.2605	258.081	-14.3941	-309
3.04	-169.068	-268.9	-291.544	99.8839	61.6248	232.193	-85.4525	21.2479	112.938	-183.16	232.847	284.26	329.36	-97.612	181.192	-7.99236	202.143	-252.034	-143.425	-105.267	-263.451	112.497	205.784	47.5559	245.073			-304.793	-4.44576	-14.4726	-249.183	276.99	278.955	-231.757	-354.683	-292.553	192.035	-204.146	-119.129	-55.3637	325.517	-241.59	-12.4763	-257.555	17.0014	-64.5365	259.542	-14.3159	-308.664
3.05	-169.444	-269.818	-291.481	99.613	61.497	231.935	-85.1941	20.4986	112.964	-183.848	232.721	284.851	331.534	-97.7351	182.084	-9.68232	202.387	-253.192	-143.68	-105.168	-266.343	112.648	206.127	48.1592	245.623			-305.337	-3.98376	-14.999	-250.234	277.255	279.807	-231.881	-356.201	-293.498	191.957	-203.766	-119.002	-55.2234	326.592	-242.114	-12.5989	-258.137	16.4306	-65.1858	259.514	-15.2479	-311.534
3.06	-170.5	-270.656	-292.945	99.4505	61.8829	231.393	-85.4004	20.2627	113.127	-185.142	234.213	284.85	332.076	-98.213	183.05	-9.387	203.228	-253.735	-144.321	-105.374	-266.359	112.728	207.78	47.73	246.443			-306.864	-3.74652	-15.3498	-251.409	278.265	281.229	-233.278	-356.588	-294.282	192.022	-205.884	-119.066	-55.2776	327.434	-243.192	-12.6858	-259.859	16.7935	-65.4185	260.967	-15.1445	-310.997
3.07	-170.644	-271.601	-292.717	99.1681	61.721	231.007	-85.608	19.6115	113.78	-186.985	234.265	287.303	334.005	-98.3154	183.898	-10.5838	203.385	-254.789	-145.823	-105.824	-267.642	112.965	207.867	48.2029	247.731			-307.34	-3.17352	-15.848	-251.898	279.17	282.463	-234.224	-358.495	-295.932	192.083	-205.908	-119.877	-55.0822	328.406	-243.857	-12.7874	-260.226	16.3145	-66.2107	261.272	-15.2848	-313.796
3.08	-171.898	-272.467	-294.002	98.796	62.1256	230.588	-85.4864	19.4591	113.936	-187.359	235.089	287.162	334.521	-99.3356	184.654	-12.3313	204.028	-255.403	-145.693	-105.652	-268.508	112.985	209.587	47.7691	248.248			-309.245	-3.078	-16.5732	-253.863	279.476	283.335	-234.523	-358.286	-296.617	192.048	-207.305	-119.697	-55.3006	329.727	-244.717	-12.793	-261.989	16.7561	-66.2502	262.837	-15.7874	-314.055
3.09	-171.888	-273.465	-293.127	98.7757	62.3318	230.025	-85.8277	18.6259	114.319	-189.421	235.949	287.916	336.678	-99.5036	185.739	-11.607	204.201	-256.278	-147.808	-106.103	-268.757	113.105	209.665	47.9543	250.225			-309.309	-2.27616	-16.4867	-253.939	281.698	285.167	-236.583	-360.894	-297.626	192.015	-208.517	-119.902	-54.8861	330.589	-245.549	-12.7282	-262.342	16.4538	-67.6424	263.197	-15.4939	-316.092
3.1	-173.091	-274.319	-294.289	98.3018	62.2303	229.784	-85.6415	18.9166	114.985	-190.08	235.883	290.317	336.827	-100.61	186.512	-14.0174	204.664	-256.834	-147.393	-105.881	-270.378	113.152	211.477	48.0893	250.553			-311.51	-2.09328	-18.182	-255.889	281.142	285.561	-236.201	-360.927	-299.018	191.976	-208.846	-120.618	-55.192	331.771	-246.4	-12.5938	-263.754	16.9829	-67.363	264.445	-16.0156	-316.483
3.11	-172.943	-275.321	-294.1	98.4322	62.7076	229.047	-86.0821	17.9622	115.098	-191.046	236.958	290	339.07	-101.13	187.457	-14.3099	204.595	-257.935	-149.315	-106.173	-271.078	113.237	211.396	47.8913	252.661			-311.123	-1.21236	-17.6093	-255.717	283.766	287.775	-238.566	-362.679	-299.345	191.883	-210.508	-120.538	-54.533	332.693	-247.202	-12.6114	-264.244	16.7041	-68.6174	265.229	-15.7462	-318.463
3.12	-174.365	-275.749	-295.117	97.6265	62.8463	228.8	-86.049	18.033	115.853	-192.918	236.88	292.148	338.976	-102.019	188.18	-14.8001	205.194	-258.403	-149.987	-106.286	-272.005	113.136	213.282	48.4993	252.585			-313.489	-1.2054	-19.2953	-257.79	284.072	288.021	-238.446	-363.615	-301.163	192.014	-210.762	-121.12	-54.8556	333.581	-247.983	-12.6266	-265.448	17.2307	-68.8892	265.773	-16.1236	-319.319
3.13	-174.326	-277.421	-294.904	97.977	62.8876	228.21	-86.3024	17.4913	116.01	-193.363	237.629	293	341.279	-102.962	189.052	-17.1019	204.922	-259.273	-150.531	-106.352	-273.884	113.368	213.262	48.3544	254.635			-313.056	0.01872	-18.0151	-257.715	284.884	290.351	-239.007	-363.901	-301.692	191.981	-211.84	-121.395	-54.1051	334.58	-248.86	-12.3284	-265.974	16.9352	-69.2191	267.018	-16.5158	-320.997
3.14	-175.409	-277.529	-295.349	97.1069	63.1453	228.13	-86.4702	16.8361	116.521	-194.844	237.597	293.283	341.371	-103.459	189.784	-16.3229	205.402	-260.11	-152.564	-106.863	-273.765	113.36	215.261	48.7816	254.63			-315.004	-0.1158	-19.7783	-259.803	287.313	290.446	-240.987	-365.833	-302.814	192.179	-212.376	-121.536	-54.4532	335.188	-249.51	-12.5279	-267.608	17.3815	-70.2406	267.312	-16.4519	-322.362
3.15	-175.904	-279.44	-296.063	97.4921	63.3876	227.702	-86.108	16.6336	117.345	-196.178	238.494	295.854	343.365	-104.79	190.749	-18.3444	205.321	-260.955	-152.068	-106.607	-276.313	113.419	215.133	49.0998	256.492			-315.438	1.17288	-19.1682	-259.633	286.841	292.752	-240.218	-365.782	-304.369	192.461	-213.635	-122.46	-53.7043	336.411	-250.611	-11.8562	-268.137	17.4445	-69.9406	269.064	-17.4179	-323.392
3.16	-176.153	-279.423	-295.767	96.5722	63.1832	227.522	-86.519	15.2612	117.466	-196.864	238.357	295.467	343.564	-105.048	191.175	-19.5577	205.735	-261.641	-154.511	-107.205	-275.95	113.655	217.254	49.0595	256.797			-316.278	0.93384	-18.9055	-261.663	288.237	293.152	-240.684	-368.583	-304.581	192.507	-214.088	-122.231	-53.9975	336.797	-251.025	-11.6934	-269.529	17.6388	-71.2985	268.667	-17.6412	-325.285
3.17	-176.89	-281.199	-297.171	97.0158	63.808	227.279	-87.059	15.5897	118.74	-198.502	239.399	296.883	345.647	-106.294	192.35	-19.4333	205.667	-262.948	-154.436	-106.998	-277.723	113.702	217.269	49.2792	258.251			-317.265	2.01924	-21.121	-261.843	289.33	294.884	-241.14	-368.278	-306.6	192.953	-215.778	-122.923	-53.284	337.871	-252.362	-11.7175	-270.096	18.0266	-71.0948	270.259	-17.9194	-325.777
3.18	-177.1	-281.327	-296.732	96.1154	63.357	227.129	-86.9995	14.6249	119.298	-199.593	239.976	298.601	346.236	-106.424	192.767	-22.3128	206.216	-263.532	-156.044	-107.564	-277.831	114.005	219.241	49.5293	258.904			-318.034	1.76088	-19.3612	-263.32	289.417	296.006	-241.831	-370.947	-307.144	193.161	-216.395	-123.669	-53.3705	338.247	-252.774	-10.6424	-271.8	18.0845	-72.0416	270.16	-18.6444	-328.252
3.19	-177.803	-282.896	-297.186	96.5946	63.8484	226.963	-87.4073	14.3004	120.236	-200.387	240.099	298.132	347.819	-108.854	193.891	-21.6719	206.085	-264.741	-156.937	-107.763	-278.532	113.881	219.462	49.2925	260.016			-319.111	2.931	-19.8348	-263.417	290.806	296.959	-243.833	-371.289	-308.221	193.299	-217.159	-123.277	-52.9102	339.725	-254.063	-10.9783	-272.355	18.8075	-72.4573	271.284	-18.3241	-327.987
3.2	-178.06	-283.241	-298.055	95.602	64.0434	226.956	-87.3529	14.0941	121.138	-202.056	241.098	300.09	348.652	-108.587	194.183	-23.2282	206.412	-265.363	-157.316	-108.198	-280.082	114.059	221.052	49.8526	260.302			-320.02	2.70048	-22.5812	-265.222	291.833	298.743	-243.366	-372.282	-309.471	193.89	-218.131	-124.503	-52.8144	339.496	-254.231	-10.2796	-274.005	18.7685	-72.729	271.695	-19.4834	-330.938
3.21	-178.73	-284.5	-298.231	96.0967	63.9688	226.825	-87.5988	13.6541	121.673	-202.539	240.984	300.767	350.025	-110.904	195.653	-25.1437	205.939	-266.56	-158.81	-108.747	-280.354	114.16	221.411	49.386	261.686			-321.393	3.76044	-22.2557	-265.155	291.904	299.25	-245.621	-373.693	-310.091	194.001	-218.552	-124.852	-52.3834	341.191	-256.151	-9.6264	-274.089	19.6151	-73.9576	272.481	-19.0723	-330.37
3.22	-179.118	-284.758	-298.593	95.2466	64.5828	227.038	-87.6995	13.4129	122.33	-204.001	241.981	300.965	351.291	-110.625	195.644	-24.6232	205.914	-267.077	-158.699	-108.873	-281.893	113.897	223.001	49.784	262.048			-322.487	3.4584	-21.784	-266.724	294.158	301.59	-246.008	-374.629	-311.059	194.577	-219.97	-125.103	-52.1471	340.953	-255.977	-9.972	-276.39	19.4045	-73.568	272.972	-20.3274	-333.428
3.23	-179.709	-286.2	-299.52	95.5177	64.9848	226.921	-87.7423	12.8383	123.146	-205.177	241.598	303.049	351.904	-112.659	197.36	-27.1903	205.754	-268.172	-160.338	-110.061	-282.258	114.181	223.295	49.4842	263.31			-323.928	4.41204	-23.8436	-267.056	293.84	301.736	-246.909	-376.063	-312.019	194.92	-220.043	-126.108	-52.0001	343.035	-258.085	-8.8596	-276.01	20.3129	-75.5179	272.766	-20.5217	-333.316
3.24	-179.832	-286.51	-299.619	94.9356	64.9748	228.307	-87.9258	12.4876	123.387	-205.651	242.885	302.481	353.712	-112.479	197.316	-26.7706	205.254	-268.704	-160.201	-110.217	-283.094	113.649	224.894	49.6848	263.594			-324.662	4.2096	-22.2638	-268.437	295.084	304.166	-248.707	-376.907	-312.331	195.127	-221.818	-126.031	-51.4372	342.689	-257.854	-9.43932	-278.594	19.9794	-75.0401	273.833	-20.9884	-335.472
3.25	-180.532	-287.859	-300.024	95.1265	65.5714	228.282	-87.9124	11.7592	124.538	-207.316	242.632	304.557	353.942	-114.188	198.821	-28.159	205.3	-270.034	-161.485	-110.882	-285.201	114.046	225.362	49.6684	264.826			-326.538	5.0382	-21.873	-268.608	295.797	304.228	-248.112	-378.409	-313.74	195.768	-221.922	-126.946	-51.3539	344.9	-259.784	-8.3628	-278.4	20.8339	-76.8604	273.133	-22.5942	-335.722
3.26	-180.625	-288.154	-300.713	94.6946	65.4305	229.436	-88.153	11.6856	124.716	-207.958	244.026	304.449	355.909	-114.038	198.705	-29.4468	204.367	-270.453	-161.966	-111.654	-284.646	113.313	226.866	49.7125	264.923			-326.756	4.78644	-24.5778	-270.083	296.196	306.3	-250.691	-379.068	-313.879	195.943	-223.861	-127.15	-50.9179	344.476	-259.598	-7.791	-281.052	20.481	-77.2486	273.972	-22.7453	-337.094
3.27	-181.113	-289.601	-300.994	94.669	66.2437	229.543	-88.2624	10.8145	125.949	-208.934	244.185	305.821	356.314	-115.501	200.306	-29.4466	204.537	-271.468	-162.098	-111.701	-286.197	113.636	227.499	49.9014	266.699			-328.959	5.54784	-24.1685	-270.495	297.428	306.579	-250.832	-380.255	-315.052	196.35	-223.911	-127.65	-50.586	347.066	-261.568	-8.03664	-280.897	21.2356	-77.7112	274.072	-23.143	-337.809
3.28	-181.266	-289.993	-301.448	94.4216	66.515	230.405	-88.2844	11.0735	126.525	-210.514	244.968	307.353	358.457	-115.62	200.116	-31.3255	203.62	-272.214	-163.393	-112.693	-287.029	113.075	228.833	49.7476	266.983			-329.151	5.3322	-23.066	-271.929	297.952	308.564	-251.741	-380.815	-315.97	196.873	-225.523	-128.411	-50.409	347.011	-261.45	-6.20832	-283.291	20.9057	-79.9858	274.585	-24.2317	-338.545
3.29	-181.85	-291.266	-302.296	94.3549	66.7417	230.687	-88.3434	10.124	126.924	-210.855	245.589	306.849	358.54	-116.555	201.693	-30.948	203.764	-273.136	-163.161	-112.844	-287.128	112.997	229.645	50.1614	269.014			-331.569	5.95848	-25.6968	-272.358	298.458	309.089	-253.194	-382.38	-316.191	197.115	-226.261	-128.194	-50.148	349.315	-263.244	-7.0854	-282.986	21.5909	-79.3657	275.272	-23.7242	-339.631
3.3	-181.89	-291.703	-302.501	94.4513	67.6987	231.153	-88.6162	10.4582	127.813	-212.483	245.658	309.389	360.716	-116.906	201.626	-32.597	202.909	-273.868	-163.796	-114.162	-288.923	112.59	230.902	49.9234	269.412			-331.544	5.6646	-26.4479	-273.6	300.448	310.362	-252.933	-382.264	-317.557	197.815	-226.935	-129.261	-50.0969	349.471	-263.328	-6.07008	-285.536	21.3624	-81.8966	275.853	-24.9888	-340.39
3.31	-182.518	-293.259	-302.734	94.2828	68.1756	231.594	-88.4192	9.15864	128.212	-213.36	246.337	309.312	360.789	-117.481	203.117	-33.6212	202.99	-274.956	-163.799	-114.31	-288.715	112.539	231.481	50.5289	270.611			-334.015	6.07596	-26.5396	-274.233	300.113	310.856	-255.017	-384.637	-318.059	198.232	-227.881	-129.354	-49.9451	351.525	-264.84	-5.18928	-285.234	22.0202	-82.3283	276.263	-24.9505	-341.309
3.32	-182.465	-293.551	-303.508	94.5542	68.0942	232.127	-88.709	9.32304	128.666	-214.118	246.156	310.247	363.039	-117.829	202.911	-32.7686	202.219	-275.737	-164.269	-114.908	-290.657	112.257	232.881	51.0592	271.009			-333.845	6.06612	-28.214	-275.246	300.843	312.091	-254.789	-384.34	-318.698	198.626	-228.221	-129.726	-50.0002	351.71	-265.127	-7.4142	-287.743	21.7037	-83.1518	276.753	-25.6889	-342.145
3.33	-183.253	-295.368	-303.576	94.3463	69.0565	232.63	-88.669	8.33028	129.234	-215.493	247.155	312.489	363.553	-118.549	204.626	-34.8726	202.418	-276.558	-164.782	-115.387	-291.719	112.208	233.199	50.9753	272.933			-336.485	6.41136	-27.3712	-276.184	302.209	313.14	-256.47	-386.752	-320.039	199.496	-229.989	-130.669	-49.8113	354.055	-266.494	-6.47508	-287.429	22.1779	-84.8242	277.092	-26.2973	-343.858
3.34	-183.024	-295.674	-305.005	94.6548	68.7773	233.082	-88.8392	7.91712	129.364	-215.839	246.841	311.583	365.09	-118.845	204.421	-36.1734	201.532	-277.36	-164.749	-115.821	-291.874	111.984	235.135	52.3388	273.23			-336.213	6.51456	-29.0252	-277.199	301.931	313.634	-256.792	-386.676	-320.39	199.788	-229.689	-130.5	-49.8709	354.676	-266.724	-5.11008	-290.098	21.9638	-84.7746	278.143	-26.5231	-344.324
3.35	-183.858	-297.574	-305.159	94.5511	69.8261	233.765	-88.8966	7.94904	129.86	-216.866	247.762	313.657	365.785	-119.45	206.069	-35.3722	201.721	-278.152	-166.011	-116.179	-294.305	111.945	235.169	52.1528	275.312			-338.854	6.89016	-29.2232	-278.254	303.927	315.829	-257.778	-387.722	-321.435	200.706	-232.103	-131.008	-49.6962	356.45	-267.874	-5.92884	-289.825	22.4346	-87.3444	277.703	-28.0739	-346.301
3.36	-183.713	-298.163	-305.876	94.7261	69.7823	233.942	-88.8126	7.23204	129.828	-218.018	247.789	314.91	367.301	-119.775	205.809	-38.2128	200.894	-279.053	-165.635	-116.605	-294.038	111.775	237.056	52.8404	275.687			-338.704	7.17048	-28.842	-278.92	303.832	315.752	-258.922	-389.37	-322.504	201.543	-231.92	-131.337	-49.7407	357.23	-268.238	-4.70196	-292.281	22.233	-87.0607	278.717	-27.5124	-346.653
3.37	-184.336	-299.697	-307.193	94.805	70.7196	234.754	-89.132	7.35144	129.94	-218.229	248.875	314.891	368.351	-120.147	207.476	-39.0296	201.068	-279.888	-166.785	-117.564	-295.597	111.57	237.088	53.1968	277.013			-340.596	7.41084	-29.902	-280.109	305.53	318.343	-259.245	-389.541	-322.869	201.842	-233.979	-131.386	-49.6589	358.887	-269.303	-4.1064	-292.138	22.6316	-89.1846	280.21	-29.0267	-348.758
3.38	-184.338	-300.102	-306.984	94.8805	71.3531	234.831	-88.9976	6.65904	129.269	-219.876	248.879	317.803	369.305	-120.633	207.276	-38.9059	200.335	-280.835	-166.803	-116.854	-296.487	111.729	238.966	53.7552	277.457			-341.276	7.63812	-29.048	-280.562	306.632	318.304	-260.7	-392.361	-324.74	203.033	-234.6	-132.274	-49.5995	359.534	-269.632	-4.61592	-294.382	22.4771	-89.5522	280.313	-29.3092	-348.681
3.39	-184.805	-302.016	-309.156	95.0878	71.3058	235.643	-89.3786	6.6672	129.262	-220.489	249.391	317.501	371.186	-120.989	208.803	-42.1723	200.378	-281.633	-167.287	-117.806	-296.629	111.514	239.133	54.2977	279.396			-342.045	8.01252	-29.688	-281.778	306.727	320.765	-260.625	-392.055	-325.163	203.581	-235.006	-132.277	-49.8223	361.278	-270.724	-3.81972	-294.7	22.7854	-90.3901	281.024	-29.9362	-351.585
3.4	-185	-302.191	-308.873	95.1164	72.7806	235.797	-89.4751	5.82012	129.015	-221.145	249.93	318.767	371.511	-121.237	208.524	-41.8222	199.725	-282.543	-168.201	-117.499	-297.606	111.358	240.448	54.6994	279.538			-342.961	8.2254	-29.3929	-282.289	309.041	320.763	-262.584	-394.781	-326.949	204.07	-236.313	-132.455	-49.6256	361.668	-270.946	-3.57468	-296.457	22.6066	-92.0713	281.678	-30.6439	-351.033
3.41	-185.509	-303.737	-310.833	95.3615	72.4975	236.456	-89.8085	5.86548	129.146	-222.634	250.246	320.988	373.872	-121.508	209.96	-43.0237	199.79	-283.122	-168.017	-118.039	-298.025	111.627	240.926	55.2126	281.62			-343.954	8.29224	-29.1724	-283.335	308.634	322.974	-262.29	-395.161	-327.993	205.287	-236.517	-132.829	-49.907	363.751	-272.141	-3.62508	-296.788	22.9385	-92.0872	282.288	-31.2101	-352.573
3.42	-185.713	-304.337	-310.946	95.2225	73.7209	236.698	-90.0436	5.50056	128.991	-222.833	250.935	320.113	374.151	-121.628	209.708	-45.5455	199.029	-284.244	-169.35	-118.04	-298.646	111.491	241.866	55.7556	281.825			-344.953	8.61936	-29.3046	-283.943	309.957	323.516	-264.348	-395.868	-328.734	205.422	-238.169	-132.868	-49.7456	365.262	-272.472	-3.55704	-298.756	22.6625	-93.7884	282.745	-31.6999	-353.914
3.43	-186.403	-305.81	-312.038	95.5596	73.8929	237.089	-90.0763	4.8486	129.342	-224.103	251.052	322.332	376.637	-121.751	210.932	-44.957	198.995	-284.865	-168.954	-117.961	-299.898	111.609	242.505	55.7914	283.149			-346.172	8.60184	-29.0411	-285.2	310.985	325.126	-263.98	-397.423	-330.559	206.67	-238.035	-133.008	-49.9909	366.219	-273.654	-3.42084	-299.079	23.057	-93.4708	283.344	-32.5513	-354.437
3.44	-186.799	-306.396	-313.165	95.3576	74.2057	237.616	-90.5682	4.53972	129.367	-224.664	251.914	323.931	376.661	-121.722	210.684	-47.4487	198.289	-285.942	-170.435	-118.476	-299.938	111.685	243.51	56.8835	283.577			-347.127	8.81496	-29.1216	-285.577	310.841	326.437	-265.873	-397.836	-331.361	207.198	-240.421	-133.284	-49.8125	367.86	-273.941	-3.77304	-300.805	22.732	-95.6308	284.237	-32.7136	-356.025
3.45	-187.402	-307.783	-313.449	95.7085	74.9885	237.889	-90.6937	3.8976	129.476	-225.376	251.584	323.525	379.05	-121.737	212.064	-47.9173	198.172	-286.435	-170.276	-116.797	-302.028	111.785	244.15	56.5577	284.847			-348.36	8.8758	-28.9943	-287.106	312.497	327.188	-266.581	-400.054	-332.69	207.815	-240.298	-133.16	-49.9439	368.607	-275.407	-3.66852	-301.248	23.1577	-95.532	283.617	-33.9438	-356.509
3.46	-187.947	-308.392	-315.199	95.2789	75.2376	238.823	-91.0304	3.86508	129.798	-226.859	252.808	326.085	379.199	-121.752	211.86	-48.7626	197.805	-287.62	-171.177	-117.399	-301.681	111.596	245.217	57.6542	285.279			-349.489	9.13728	-29.0395	-287.207	312.09	329.189	-266.92	-400.32	-334.533	208.84	-241.764	-133.628	-49.8468	370.363	-275.566	-3.77616	-302.49	22.9291	-96.6302	285.339	-33.5064	-358.13
3.47	-188.472	-309.727	-315.005	95.7194	75.8647	239.053	-91.602	3.30792	129.77	-226.962	252.667	325.787	381.302	-121.76	213.246	-50.9353	197.307	-288.087	-172.057	-117.194	-303.571	111.747	245.665	57.7787	286.989			-350.55	9.20688	-29.0276	-288.546	313.672	329.448	-268.952	-402.09	-334.927	208.995	-242.653	-133.509	-49.7599	370.984	-277.4	-4.07292	-303.829	23.3672	-97.9259	285.32	-34.9574	-358.555
3.48	-189.025	-310.299	-317.013	95.2916	76.3356	240.346	-91.4316	3.13992	130.205	-228.812	253.4	327.043	381.309	-121.673	212.899	-51.2555	197.204	-289.084	-171.773	-115.977	-303.87	111.135	246.608	58.0176	287.412			-351.783	9.52524	-28.924	-288.714	314.621	331.599	-268.767	-402.453	-336.991	210.064	-242.881	-133.747	-49.8121	372.586	-277.525	-4.35252	-304.213	23.2084	-97.6753	285.238	-34.6494	-360.915
3.49	-189.408	-311.422	-316.758	95.7438	76.5037	240.531	-92.2224	2.71896	130.26	-229.426	253.889	328.96	383.599	-121.553	213.951	-51.5039	196.438	-289.768	-173.756	-116.288	-304.473	111.322	247.106	58.7852	289.083			-352.636	9.57228	-29.1172	-290.309	314.896	331.854	-271.362	-403.868	-337.878	210.523	-244.22	-134.224	-49.5146	373.03	-279.616	-4.08936	-306.255	23.6129	-99.7622	286.879	-35.5428	-360.762
3.5	-190.042	-312.229	-318.973	95.2093	77.6861	241.447	-92.3563	2.45064	130.326	-230.432	254.167	328.558	383.542	-121.468	213.871	-53.0998	196.624	-290.881	-173.258	-115.749	-305.332	110.517	247.848	58.6838	289.6			-354.143	10.0115	-28.8692	-290.319	316.916	333.866	-271.07	-403.961	-338.756	211.073	-244.332	-134.066	-49.5772	375.123	-279.406	-4.31316	-306.181	23.4726	-99.2886	286.188	-35.7814	-363.453
3.51	-190.238	-313.34	-318.587	95.7164	77.2372	242.143	-92.6777	2.0052	130.683	-231.956	255.119	331.187	386.072	-121.433	214.836	-53.0677	195.739	-291.229	-174.888	-115.136	-305.782	110.707	248.523	59.3471	290.793			-354.51	10.1503	-29.0022	-291.925	316.665	335.006	-272.879	-406.244	-340.592	211.774	-246.577	-134.667	-49.1598	375.037	-282.026	-4.059	-308.984	23.8283	-101.366	287.804	-36.1392	-363.051
3.52	-191.167	-314.407	-320.519	95.2128	78.5164	242.494	-92.6497	1.94616	130.727	-232.339	254.941	331.217	386.022	-121.853	214.854	-55.3634	195.905	-292.532	-175.662	-115.365	-306.725	109.936	249.075	59.7365	291.103			-356.611	10.5564	-28.6577	-292.132	318.136	335.999	-273.543	-406.158	-340.896	211.939	-246.195	-134.748	-49.2962	377.524	-281.761	-4.7328	-308.513	23.7864	-102.311	288.537	-36.8522	-365.788
3.53	-191.094	-315.137	-320.348	95.666	78.2027	243.318	-92.7954	1.31364	131.235	-233.919	256.325	331.825	388.352	-121.705	215.459	-55.0561	195.015	-292.875	-175.729	-115.516	-307.33	110.178	249.824	59.8649	292.966			-356.72	10.6604	-28.988	-293.502	318.742	337.712	-274.194	-408.551	-342.698	212.42	-249.433	-134.845	-48.7151	377.317	-284.047	-4.30716	-311.455	24.2724	-102.507	289.116	-37.1144	-365.423
3.54	-192.018	-316.347	-322.35	95.1392	78.9989	243.603	-93.1085	1.53804	131.39	-235.053	256.03	334.236	388.47	-122.543	215.65	-57.6538	195.042	-294.144	-177.385	-115.438	-308.055	109.351	250.656	60.7543	293.256			-358.798	11.0801	-28.3823	-293.573	318.876	338.386	-275.905	-408.928	-343.664	212.771	-249.141	-135.17	-48.7735	380.57	-284.143	-5.52192	-311.372	24.202	-104.461	291.65	-37.7224	-367.961
3.55	-191.869	-317.146	-322.116	95.5076	79.4783	244.361	-92.8972	0.73164	131.549	-235.804	257.052	333.654	390.456	-122.361	216.061	-57.1495	194.393	-294.244	-177.247	-115.584	-309.095	109.389	251.45	60.6827	295.343			-358.77	11.1251	-28.8533	-295.315	320.276	340.419	-275.59	-409.774	-344.301	213.008	-251.623	-135.414	-48.1765	380.09	-286.03	-5.14236	-313.307	24.5976	-104.017	291.289	-38.1558	-367.866
3.56	-192.976	-318.424	-324.166	95.0635	79.7552	244.373	-93.5336	0.47136	132.026	-237.569	257.219	335.288	390.692	-123.163	216.441	-59.4936	194.21	-295.474	-178.94	-115.525	-309.146	108.49	252.397	61.2131	295.494			-361.169	11.4842	-27.9431	-295.165	319.92	340.634	-277.886	-411.409	-346.232	213.385	-252.225	-135.409	-48.171	383.377	-286.486	-6.24888	-313.86	25.1572	-106.229	293.219	-38.5427	-370.011
3.57	-192.823	-319.47	-324.141	95.3729	80.8998	245.412	-93.2474	0.21252	132.225	-238.143	257.487	336.182	392.58	-123.026	216.908	-59.4799	193.792	-295.893	-178.938	-115.808	-311.332	108.258	253.212	61.59	297.102			-360.835	11.6924	-28.4459	-297.498	321.832	342.919	-277.566	-411.124	-346.457	213.516	-253.099	-135.399	-47.4575	382.895	-288.007	-6.01644	-315.066	25.3036	-105.96	293.639	-39.9284	-370.747
3.58	-193.781	-320.692	-325.901	95.2025	80.5955	245.401	-93.7388	-0.91308	132.574	-239.366	257.442	335.919	393.207	-123.718	217.377	-60.7733	193.631	-296.644	-179.86	-115.762	-311.06	107.867	253.94	61.4429	297.429			-363.712	12.0085	-27.6559	-297.262	321.952	343.164	-279.243	-413.401	-347.964	213.872	-254.169	-135.824	-47.3725	385.902	-288.711	-6.84936	-315.91	25.9294	-107.495	294.768	-39.5816	-371.909
3.59	-193.641	-321.477	-325.794	95.2081	80.9977	246.332	-93.8381	-0.52224	132.721	-240.692	257.721	338.59	394.804	-123.261	217.793	-61.8853	193.075	-297.324	-180.58	-115.839	-313.024	107.246	254.555	61.6345	299.017			-363.427	12.155	-28.1411	-299.342	322.094	345.156	-279.901	-412.933	-348.52	214.467	-254.641	-136.054	-46.8396	386.306	-289.556	-7.68948	-316.912	26.0486	-108.283	295.749	-41.3495	-373.356
3.6	-194.15	-322.872	-327.734	95.3105	82.2839	246.692	-93.8708	-2.51676	132.968	-241.107	257.66	338.398	395.733	-124.467	218.777	-62.1886	192.864	-298.052	-180.81	-116.3	-313.507	107.127	255.604	61.8264	299.33			-366.014	12.4105	-27.476	-300.166	323.187	345.866	-280.407	-415.243	-349.407	214.488	-256.062	-135.767	-46.4612	388.11	-291.047	-7.85604	-318.207	26.7719	-108.516	296.153	-41.8232	-374
3.61	-194.116	-323.713	-327.673	95.1344	82.3042	247.339	-94.3742	-2.51028	132.966	-242.769	258.306	337.717	396.959	-124.667	218.966	-64.0712	192.457	-298.794	-181.694	-115.946	-314.358	106.446	256.12	61.4974	301.211			-365.757	12.4841	-27.9485	-300.861	323.717	347.308	-282.054	-415.361	-350.11	215.327	-256.537	-136.069	-46.0708	388.591	-291.173	-8.8704	-318.467	26.7948	-110.449	297.562	-42.2893	-375.813
3.62	-194.43	-325.123	-329.429	95.2019	82.8901	248.122	-94.27	-3.58404	133.035	-243.284	258.257	339.59	398.171	-125.093	219.777	-63.8071	192.259	-299.545	-181.905	-116.722	-316.334	106.343	256.949	61.7254	301.7			-368.601	12.8524	-27.4284	-302.609	323.997	348.454	-282.265	-416.655	-350.464	215.62	-258.268	-137.144	-45.4835	389.459	-292.655	-9.19476	-319.758	27.7007	-110.185	297.945	-43.6769	-376.165
3.63	-194.537	-325.635	-329.47	95.2073	83.4811	248.392	-94.9148	-4.68996	133.175	-244.074	257.936	341.121	399.112	-125.558	220.06	-65.1404	191.791	-300.259	-182.656	-116.245	-315.628	105.771	257.398	61.3771	303.138			-368.535	12.8478	-27.9089	-302.568	325.239	349.17	-284.184	-417.393	-351.743	216.056	-258.819	-137.743	-45.2275	391.151	-292.586	-9.43368	-319.844	27.661	-112.614	299.486	-43.4752	-378.58
3.64	-194.879	-327.345	-331.169	95.0209	83.4706	249.547	-94.7768	-4.90044	133.374	-245.357	257.414	340.496	400.513	-125.886	220.814	-65.6922	191.367	-300.84	-182.75	-116.937	-317.941	105.756	258.928	61.5152	303.886			-371.252	13.2546	-28.3501	-305.197	325.307	350.94	-283.894	-417.776	-352.673	216.995	-261.622	-137.084	-44.462	391.089	-294.129	-9.94584	-321.364	28.6484	-112.132	299.537	-44.1938	-378.306
3.65	-194.847	-327.648	-332.539	95.1912	84.9505	249.524	-95.5175	-6.01488	133.519	-245.61	257.52	342.447	400.851	-127.347	221.113	-66.2695	191.133	-301.78	-183.243	-116.672	-318.349	105.254	259.223	61.1641	304.918			-371.172	13.2109	-28.1749	-304.647	327.258	351.263	-286.243	-418.92	-353.197	217.161	-261.301	-138.218	-44.5217	393.522	-293.982	-9.20952	-321.307	28.5943	-114.535	301.177	-44.8321	-381.195
3.66	-195.308	-329.398	-332.443	95.0426	85.1118	251.023	-95.278	-6.53856	133.7	-247.118	257.037	343.113	402.69	-127.044	221.586	-67.2528	190.279	-302.396	-183.436	-117.237	-319.096	105.226	261.323	61.3378	305.435			-373.821	13.6187	-29.1457	-307.191	327.148	353.265	-285.833	-419.415	-354.801	218.349	-262.799	-138.788	-43.5017	392.703	-295.275	-9.83172	-323.608	29.5728	-114.363	301.347	-44.6194	-380.601
3.67	-195.109	-330.242	-334.16	95.2278	85.3028	250.857	-95.8511	-7.91448	133.769	-247.54	257.044	343.261	402.813	-129.389	222.02	-67.5097	190.222	-303.301	-183.547	-117.251	-320.26	104.833	261.274	61.1408	306.788			-373.866	13.6416	-29.3222	-307.128	327.977	353.467	-287.852	-420.427	-355.41	218.674	-264.088	-138.843	-43.5977	394.377	-295.349	-10.0324	-323.409	29.3622	-115.752	302.739	-45.3475	-383.678
3.68	-195.696	-331.623	-332.841	95.1082	86.428	251.916	-95.7997	-8.4792	134.062	-248.347	256.872	345.11	404.87	-129.064	222.412	-70.1099	189.38	-303.68	-183.88	-117.629	-320.85	104.863	263.988	61.0984	307.839			-376.175	13.9264	-29.5672	-308.653	328.815	354.97	-287.801	-421.071	-356.567	219.307	-264.533	-140.055	-42.4765	394.106	-296.367	-10.6964	-325.785	30.1986	-117.745	303.042	-45.2914	-383.514
3.69	-195.651	-332.515	-334.866	95.3064	86.123	252.438	-95.9716	-9.90756	134.148	-249.445	256.884	345.344	404.906	-131.103	222.942	-69.7763	189.651	-304.545	-183.911	-117.992	-321.692	104.584	263.797	60.8454	308.865			-376.741	14.0676	-31.1712	-309.455	329.114	356.168	-289.05	-422.042	-358.008	220.303	-265.972	-139.85	-42.5472	394.426	-296.618	-10.7574	-325.438	29.9244	-117.334	304.421	-45.7846	-385.77
3.7	-196.007	-333.655	-335.061	95.2672	87.6312	253.189	-96.3577	-9.97344	134.246	-249.7	256.77	345.534	407.147	-131.583	223.468	-72.3764	188.462	-305.056	-183.818	-118.277	-322.609	104.475	266.298	61.1084	310.047			-377.889	14.1826	-31.0748	-310.325	330.519	356.926	-290.208	-422.257	-358.422	220.457	-266.745	-140.281	-41.4906	394.777	-297.792	-12.0214	-327.736	30.7092	-120.203	304.81	-46.1429	-386.626
3.71	-196.119	-334.468	-336.692	95.2912	87.2525	253.452	-96.0686	-11.5444	134.418	-251.11	256.832	347.3	407.25	-132.846	224.255	-71.9087	188.833	-306.146	-183.921	-118.86	-323.007	104.329	266.118	60.4169	310.89			-379.248	14.291	-32.2654	-311.397	330.476	358.379	-290.008	-423.662	-359.97	221.637	-268.414	-141.769	-41.5108	395.127	-297.501	-11.53	-327.777	30.4886	-119.907	305.996	-46.1533	-387.468
3.72	-196.36	-335.77	-337.115	95.3112	88.6477	254.013	-96.2426	-11.4094	134.507	-251.913	256.754	347.357	409.432	-133.589	225.409	-73.9204	187.944	-306.537	-184.125	-119.012	-324.342	104.163	268.564	60.5486	312.425			-379.348	14.4134	-32.469	-312.01	331.84	359.356	-292.6	-423.808	-360.934	222.279	-268.843	-141.299	-40.6402	395.583	-298.644	-12.7984	-328.928	31.1842	-122.195	306.715	-47.3407	-389.706
3.73	-196.681	-336.593	-338.138	95.314	89.1383	255.456	-96.1433	-13.3676	134.616	-252.55	256.78	347.869	409.523	-134.1	225.823	-74.9616	188.015	-307.444	-184.008	-119.691	-324.489	104.157	268.689	60.4226	312.913			-381.284	14.4337	-33.1249	-313.043	332.115	361.113	-292.23	-425.551	-361.649	222.818	-270.676	-142.412	-40.645	395.633	-298.752	-13.3286	-329.453	30.8474	-122.595	307.535	-46.8694	-389.547
3.74	-196.796	-337.628	-339.045	95.4114	89.5818	255.615	-96.2905	-13.4531	134.765	-253.904	256.94	348.776	411.344	-135.275	227.166	-75.4669	187.281	-307.874	-184.326	-119.826	-325.865	103.803	270.73	59.9887	314.203			-381.197	14.4004	-33.3802	-313.666	332.71	361.409	-294.475	-425.539	-363.389	223.932	-270.867	-142.638	-39.947	396.256	-299.71	-13.6946	-330.183	31.2962	-123.684	308.493	-48.6643	-392.314
3.75	-197.16	-338.582	-339.959	95.2904	90.4958	257.689	-96.2807	-15.0574	134.908	-254.324	256.883	348.6	411.857	-135.592	227.482	-77.3742	186.99	-309.085	-184.436	-120.557	-326.114	103.861	270.803	59.9182	315.078			-383.658	14.646	-34.1105	-314.892	333.806	362.914	-294.3	-427.18	-363.754	224.17	-272.935	-143.085	-39.8704	396.343	-300.169	-14.8428	-330.845	31.3212	-125.19	309.072	-48.3044	-391.865
3.76	-197.386	-339.788	-341.144	95.6233	90.9893	257.585	-96.5646	-15.9302	135.031	-255.467	257.149	350.111	413.56	-136.895	228.7	-77.0366	186.089	-310.137	-184.398	-120.909	-327.787	103.541	272.594	59.456	316.029			-383.232	14.6494	-35.0363	-315.113	333.953	363.002	-295.965	-427.375	-365.009	225.248	-273.079	-144.203	-39.4169	396.623	-300.742	-14.6932	-332.21	31.1774	-125.184	310.251	-50.4422	-394.703
3.77	-197.889	-340.31	-341.478	95.3693	91.3432	259.971	-96.5999	-16.0685	135.282	-256.759	257.052	350.034	414.054	-137.42	229.143	-79.3858	185.909	-310.481	-184.605	-121.519	-327.735	103.679	272.838	59.2121	316.772			-386.088	14.7614	-35.2026	-316.641	334.682	364.386	-297.222	-427.9	-366.327	226.208	-274.189	-144.366	-39.2021	397.054	-301.158	-16.1116	-332.91	31.4308	-127.867	310.687	-49.9142	-394.103
3.78	-197.774	-341.974	-343.325	95.7848	92.1864	260.12	-96.7468	-17.5823	135.435	-257.176	256.974	350.937	415.831	-138.898	230.24	-79.3626	184.858	-312.271	-184.65	-122.056	-329.059	103.09	274.418	58.9819	318.603			-385.663	14.6189	-36.608	-316.799	335.463	364.557	-297.044	-429.326	-366.817	226.489	-274.87	-145.164	-38.797	397.843	-301.666	-15.5102	-334.193	30.9691	-127.141	311.651	-51.6614	-397.082
3.79	-198.756	-342.545	-343.113	95.4691	92.0983	262.113	-97.5382	-17.2913	135.896	-258.754	257.078	352.174	416.373	-139.33	230.929	-80.2319	184.287	-312.096	-184.268	-122.545	-329.578	103.035	274.646	58.3531	318.835			-388.251	14.8051	-36.4466	-318.642	335.734	365.959	-299.723	-429.22	-369.048	227.766	-276.06	-146.178	-38.6192	398.226	-302.219	-16.5911	-335.265	31.2667	-129.474	312.377	-52.2168	-396.843
3.8	-198.514	-344.019	-345.502	95.9462	93.8022	262.396	-97.0394	-19.3336	136.699	-259.367	256.987	351.691	418	-140.539	231.761	-81.2483	183.536	-314.427	-184.505	-123.328	-329.881	102.711	276.354	58.3606	320.376			-388.178	14.6281	-37.8083	-318.457	337.478	366.011	-299.407	-431.567	-369.616	228.123	-276.595	-146.062	-38.1847	399.131	-302.719	-16.2973	-336.022	30.8646	-129.924	313.436	-52.384	-398.602
3.81	-199.398	-344.759	-344.964	95.6917	93.495	264.202	-97.9238	-19.1448	137.306	-260.298	257.137	353.766	418.828	-141.022	232.57	-81.1681	182.363	-314.014	-184.079	-123.351	-331.747	102.387	276.811	57.7148	321.069			-391.209	14.8172	-37.6601	-320.327	337.155	367.541	-300.746	-431.139	-371.561	228.823	-278.446	-147.654	-37.8985	399.515	-303.353	-16.2454	-337.609	30.7426	-130.668	313.979	-54.6914	-400.143
3.82	-199.433	-346.16	-347.289	96.1148	95.2837	264.776	-98.4872	-20.953	138.243	-261.739	257.158	353.707	419.726	-142.109	233.093	-83.0086	182.133	-315.471	-183.904	-124.393	-331.378	102.286	278.196	57.5514	322.162			-390.826	14.6204	-38.6388	-320.098	339.116	367.739	-302.129	-433.251	-372.988	229.78	-279.315	-147.661	-37.5572	400.858	-303.823	-15.789	-337.98	30.4532	-132.113	314.913	-54.2674	-400.091
3.83	-200.151	-346.76	-347.02	96.0655	95.1394	266.384	-98.2812	-21.3359	138.613	-262.083	257.45	354.159	421.225	-142.379	234.04	-82.5896	180.788	-317.059	-184.066	-124.137	-333.053	101.734	278.8	57.3931	322.821			-393.772	14.8328	-38.795	-322.181	338.914	368.858	-301.809	-433.796	-374.113	229.995	-280.595	-148.113	-37.3534	400.636	-304.33	-15.8714	-339.654	30.4471	-132.206	315.473	-55.9842	-402.973
3.84	-200.3	-348.201	-348.737	96.4031	96.0808	267.151	-99.5599	-21.7459	138.927	-263.508	257.512	356.172	421.752	-144.093	234.144	-84.8256	180.834	-317.388	-183.468	-125.358	-333.521	101.809	280.111	56.52	324.821			-393.704	14.5798	-39.1448	-322.092	339.924	369.564	-304.123	-434.519	-375.265	230.777	-281.929	-149.708	-37.0342	402.9	-304.977	-15.6445	-339.608	30.2756	-133.219	316.365	-56.5159	-402.721
3.85	-200.592	-348.567	-349.041	96.5423	97.3884	268.115	-99.4764	-22.8115	138.909	-264.438	257.848	355.562	423.723	-143.712	235.294	-84.4944	179.321	-318.929	-183.716	-124.852	-334.02	100.877	280.681	56.7862	325.007			-395.535	14.7569	-39.9263	-323.829	341.292	370.021	-303.813	-435.536	-375.604	231.359	-282.511	-149.24	-36.716	402.009	-305.583	-15.6211	-341.699	29.8025	-134.036	316.973	-56.9087	-405.475
3.86	-201.161	-350.308	-349.969	96.6703	97.3248	269.673	-100.054	-23.2931	139.133	-264.819	257.7	357.114	423.877	-145.994	235.353	-87.1694	179.264	-319.026	-183.166	-126.067	-335.46	101.056	282.218	55.7456	326.628			-396.323	14.4557	-39.6833	-323.821	341.01	371.336	-304.917	-436.11	-376.395	231.584	-283.648	-150.575	-36.4045	402.929	-306.269	-16.2853	-341.474	29.8968	-134.04	317.974	-58.6549	-405.096
3.87	-201.074	-350.391	-350.751	97.0376	98.9587	269.991	-100.523	-24.6144	139.109	-266.421	258	358.283	426.026	-146.227	236.431	-87.2281	178.47	-320.688	-183.191	-125.604	-335.101	99.9448	282.275	55.692	327.004			-396.929	14.7497	-40.7051	-325.451	342.887	371.535	-305.77	-438.113	-376.769	232.578	-283.931	-151.469	-35.9635	403.908	-306.858	-16.4665	-343.188	28.9896	-136.138	318.489	-58.3242	-407.247
3.88	-201.588	-352.331	-350.955	97.0474	99.0463	271.713	-100.925	-24.7106	139.207	-266.826	257.998	358.063	425.937	-147.126	236.51	-89.1925	178.126	-321.049	-182.943	-126.901	-337.062	100.104	284.085	55.3441	328.273			-398.289	14.4896	-40.2869	-325.62	343.01	373.101	-305.898	-438.206	-377.915	232.826	-285.552	-151.035	-35.6959	403.658	-307.631	-17.0214	-343.218	29.2472	-135.445	319.926	-60.3673	-407.609
3.89	-201.609	-352.328	-351.892	97.7798	99.4501	272.028	-101.564	-25.9338	139.163	-267.843	258.337	359.955	428.221	-148.401	237.401	-91.0542	177.763	-322.323	-183.209	-126.305	-337.06	98.9395	284.067	54.5694	328.696			-398.91	14.7736	-41.9837	-326.916	343.445	372.897	-307.562	-439.654	-378.46	233.484	-285.667	-152.802	-35.1326	404.269	-308.088	-17.7452	-344.439	28.303	-138.05	320.005	-60.2543	-408.95
3.9	-202.051	-354.238	-351.788	97.7153	100.445	273.836	-101.708	-26.2556	139.103	-269.151	258.498	360.075	427.998	-148.674	237.584	-90.9026	177.613	-322.789	-183.054	-127.468	-338.207	98.5036	285.99	54.6258	330.599			-400.35	14.5154	-41.4572	-327.619	344.846	374.52	-307.188	-440.049	-378.829	234.083	-287.568	-153.05	-35.0045	404.154	-308.944	-17.791	-344.883	28.3416	-138.437	321.776	-61.6884	-409.77
3.91	-202.155	-354.285	-352.583	98.371	100.414	274.033	-102.802	-27.3763	138.921	-269.492	258.398	360.098	430.354	-150.359	238.248	-93.7943	177.109	-323.975	-183.487	-127.128	-339.056	97.8545	286.026	53.8228	330.627			-401.011	14.8409	-43.2797	-328.52	344.433	374.377	-309.305	-441.313	-379.947	234.279	-288.08	-152.818	-34.2514	404.569	-309.44	-18.8826	-346.007	27.2435	-138.182	321.801	-62.3165	-410.401
3.92	-203.019	-356.197	-352.922	98.4245	101.704	275.735	-102.7	-27.8297	138.97	-271.228	258.85	362.425	430.22	-150.124	238.656	-93.5352	177.348	-324.501	-184.87	-127.654	-339.242	96.962	287.767	53.7564	332.114			-403.003	14.5391	-42.9179	-329.248	346.293	376.106	-308.841	-441.586	-380.116	235.196	-288.919	-153.888	-34.0684	404.388	-310.271	-18.5305	-346.335	27.6114	-141.026	323.165	-62.9395	-411.559
3.93	-202.998	-356.409	-353.971	99.0347	101.676	276.141	-103.515	-29.1218	138.614	-271.879	258.878	362.333	432.328	-152.785	239.28	-95.6418	176.491	-325.429	-184.508	-128.169	-340.242	96.6214	287.659	53.559	332.426			-403.233	14.8531	-44.7192	-330.105	346.174	376.099	-310.597	-443.168	-381.373	235.434	-290.35	-153.921	-33.2569	404.858	-310.674	-19.9662	-348.157	26.6134	-140.572	323.997	-64.365	-411.919
3.94	-203.694	-357.949	-354.118	99.1997	102.579	277.371	-104.094	-29.5463	138.378	-272.769	259.021	362.805	432.497	-152.915	239.703	-95.6872	176.772	-325.805	-185.13	-127.442	-340.721	94.8296	289.669	53.1653	333.591			-405.422	14.6232	-44.496	-330.996	347.117	377.563	-311.301	-443.872	-382.188	235.812	-290.396	-154.187	-33.0922	404.997	-311.424	-19.6523	-348.226	27.0385	-141.216	324.317	-64.577	-413.373
3.95	-203.65	-358.436	-355.484	99.6091	103.533	278.176	-104.209	-30.62	138.445	-274.449	259.326	365.328	434.215	-154.811	240.364	-97.4352	175.819	-326.9	-186.721	-127.882	-340.748	95.3838	289.656	52.9735	334.115			-405.512	14.8495	-46.5216	-331.869	348.516	378.603	-311.459	-444.9	-382.638	236.48	-291.815	-155.513	-32.2421	405.632	-312.237	-20.8574	-350.347	26.0873	-143.299	326.219	-65.3795	-413.245
3.96	-204.368	-359.937	-355.488	99.8455	103.393	278.874	-105.072	-30.9847	138.007	-274.648	259.662	365.433	434.732	-155.502	240.614	-97.7014	176.003	-327.196	-186.283	-127.69	-341.567	92.9149	291.511	53.0228	335.356			-407.893	14.5546	-46.1017	-332.567	348.539	379.381	-313.332	-445.774	-383.772	236.339	-292.171	-155.374	-31.7892	405.736	-313.311	-21.2651	-350.062	26.5298	-142.75	325.476	-66.2197	-414.922
3.97	-204.243	-360.66	-357.161	100.212	104.445	279.616	-105.259	-31.6753	137.774	-276.144	259.828	366.167	436.222	-156.439	241.2	-98.7972	175.068	-328.231	-188.148	-127.366	-341.333	93.2989	291.382	52.6026	336.146			-407.673	14.663	-48.0612	-333.287	349.409	381.181	-313.199	-445.917	-384.633	236.759	-293.67	-155.586	-31.0493	406.529	-313.87	-21.7583	-352.316	25.691	-144.474	327.498	-66.5285	-414.926
3.98	-205.103	-362.199	-358.867	100.45	104.784	279.931	-106.083	-32.8805	137.363	-276.965	259.95	368.757	436.922	-157.414	241.304	-100.265	175.025	-328.761	-188.376	-127.582	-343.102	91.4311	293.282	52.8294	336.764			-410.088	14.3455	-49.1081	-334.24	350.127	381.513	-314.705	-447.364	-386.298	236.721	-294.393	-156.437	-30.6718	406.785	-314.472	-22.5095	-352.287	26.1268	-145.173	328.38	-68.0172	-416.106
3.99	-204.86	-362.875	-359.583	100.703	105.205	280.888	-106.14	-33.0109	137.257	-277.794	259.917	367.963	438.189	-157.329	242.242	-100.386	174.384	-329.551	-189.135	-127.143	-342.662	91.2756	293.291	52.4754	337.683			-410.034	14.5271	-49.1526	-334.961	350.145	383.339	-314.754	-447.093	-386.759	236.893	-295.226	-156.536	-30.0398	407.274	-315.388	-22.6595	-354.077	25.3846	-145.372	329.398	-68.0712	-416.481
4	-205.787	-364.116	-360.065	101.037	106.284	280.804	-107.027	-35.0023	136.606	-278.759	259.995	369.025	439.024	-158.4	242.127	-102.032	174.023	-330.183	-189.844	-126.898	-344.76	89.8991	295.361	52.724	338.214			-412.466	14.2627	-49.8504	-335.84	351.402	383.647	-316.35	-448.981	-389.465	237.234	-296.831	-156.442	-29.3981	407.768	-315.834	-23.1554	-354.866	25.9556	-146.51	330.851	-69.5676	-417.295
4.01	-205.754	-365.013	-361.118	101.391	106.313	281.976	-107.176	-34.6768	136.687	-279.591	259.79	371.473	439.919	-158.25	243.799	-102.043	173.727	-331.331	-190.347	-126.974	-344.742	89.5048	295.344	52.4005	339.015			-412.402	14.3184	-50.067	-336.846	351.116	385.414	-316.721	-448.67	-391.148	237.268	-296.905	-157.012	-29.1332	408.231	-317.233	-23.337	-356.007	25.4471	-146.534	330.995	-69.214	-417.747
4.02	-206.554	-366.495	-361.256	101.571	107.983	282.024	-107.775	-37.4275	136.706	-281.451	259.54	371.211	441.156	-159.54	243.608	-103.771	173.059	-331.458	-190.901	-126.27	-345.86	88.6132	297.195	52.5475	339.693			-415.074	14.1481	-50.6182	-337.315	352.922	385.859	-317.645	-450.505	-391.433	237.853	-298.199	-157.03	-28.192	409.048	-317.432	-23.6407	-357.426	26.1287	-147.403	333.393	-70.3481	-418.382
4.03	-206.496	-366.863	-362.75	101.953	107.47	282.895	-108.1	-37.3574	137.129	-282.261	259.477	372.158	441.702	-159.298	245.089	-103.915	172.983	-332.986	-191.488	-126.725	-346.832	87.15	297.27	52.3942	340.902			-414.801	14.1715	-51.2582	-338.444	352.765	387.259	-318.579	-450.669	-393.567	238.233	-298.812	-157.048	-28.1593	409.239	-318.719	-23.887	-357.699	26.2292	-147.672	333.014	-70.766	-419.224
4.04	-207.542	-368.565	-362.658	101.981	108.929	283.144	-108.343	-38.5526	137.347	-283.141	258.734	374.342	443.228	-160.877	245.522	-105.107	172.047	-333.162	-192.063	-125.949	-346.988	87.3721	299.241	52.322	341.156			-417.487	14.1157	-51.8054	-338.834	353.748	387.906	-319.13	-451.451	-394.217	238.586	-299.534	-157.544	-26.972	410.187	-318.754	-24.0336	-359.941	26.073	-148.523	335.295	-70.9873	-419.378
4.05	-207.44	-368.966	-364.303	102.167	109.153	283.882	-109.245	-39.4324	137.708	-284.757	258.196	373.594	443.475	-160.57	246.25	-105.413	171.833	-334.848	-192.672	-126.099	-348.089	84.9475	299.164	52.3072	341.946			-417.268	14.0242	-52.5374	-339.968	354.804	389.21	-320.779	-452.243	-395.326	239.481	-301.187	-157.229	-27.2348	410.222	-319.814	-23.9435	-359.842	26.314	-149.53	335.733	-72.028	-420.612
4.06	-208.645	-370.526	-364.131	102.681	109.493	284.108	-109.131	-40.1266	138.277	-285.264	257.838	375.481	445.144	-162.291	247.234	-106.571	171.532	-334.803	-193.084	-126.008	-348.553	85.5094	300.988	51.6635	342.412			-419.538	14.1152	-52.9814	-341.428	354.456	389.748	-320.605	-452.503	-396.787	239.631	-301.204	-157.576	-25.8416	411.14	-320.268	-24.8424	-361.521	26.096	-149.478	336.537	-72.3383	-420.449
4.07	-208.365	-371.201	-365.803	102.422	110.791	284.661	-110.2	-41.4371	138.52	-286.768	257.806	376.944	445.31	-162.036	247.859	-106.763	171.198	-336.579	-194.065	-125.49	-349.274	83.0833	301.022	51.7723	343.455			-419.766	14.1646	-53.7288	-341.408	356.216	390.88	-322.525	-453.496	-397.125	240.437	-302.663	-158.047	-26.13	411.309	-321.07	-24.6844	-361.847	26.3821	-151.519	338.494	-73.3392	-421.811
4.08	-209.228	-372.374	-365.722	103.171	110.682	285.228	-109.992	-42.1213	139.413	-287.555	257.528	376.392	447.109	-163.184	248.564	-107.808	170.935	-336.916	-194.007	-125.931	-350.517	83.3039	303.114	51.1309	343.648			-420.888	14.2526	-54.2256	-343.607	355.784	391.843	-322.465	-453.965	-398.823	240.78	-302.816	-157.698	-24.6437	411.999	-321.308	-26.2156	-363.255	26	-150.908	338.578	-74.3209	-421.621
4.09	-209.433	-373.384	-367.316	102.816	112.437	285.556	-111.285	-43.9624	139.787	-288.306	257.274	379.191	447.299	-162.677	249.21	-108.434	170.705	-338.158	-195.148	-125.184	-350.556	81.4957	303.059	50.8558	345.356			-421.743	14.2613	-54.8544	-343.399	357.543	392.272	-324.35	-454.86	-399.458	241.17	-304.748	-159.096	-24.8129	412.452	-322.326	-26.4074	-363.491	26.5325	-153.387	340.501	-74.4139	-422.91
4.1	-209.819	-374.441	-367.342	103.405	112.488	286.755	-110.866	-44.4437	140.245	-290.015	257.034	379.044	448.899	-164.869	249.845	-108.925	170.171	-338.517	-195.287	-125.795	-352.305	80.9274	304.955	50.5938	345.459			-422.386	14.3795	-55.385	-345.331	357.67	393.879	-324.116	-455.298	-400.206	241.997	-305.29	-158.974	-23.6334	413.345	-322.21	-27.3473	-365.245	26.081	-153.575	340.243	-76.404	-423.008
4.11	-210.258	-375.361	-369.067	103.122	113.787	286.629	-112.139	-46.1416	141.235	-290.367	256.577	380.01	449.287	-163.788	250.706	-110.567	169.915	-340.14	-195.759	-124.997	-351.975	80.0255	305.378	50.2891	346.971			-423.453	14.4078	-55.8668	-345.117	358.217	393.826	-325.747	-456.04	-401.906	242.201	-306.854	-159.221	-23.6054	412.957	-323.283	-28.2212	-365.846	26.7367	-154.545	342.259	-76.0631	-423.691
4.12	-210.668	-376.79	-369.178	103.452	114.949	288.517	-112.014	-46.3422	141.264	-291.484	256.578	382.377	450.608	-163.637	251.258	-110.419	169.491	-340.219	-196.406	-125.508	-352.709	78.3894	306.704	49.7083	347.399			-424.58	14.687	-56.4888	-347.128	359.165	395.415	-325.976	-456.328	-401.978	242.842	-308.014	-159.716	-22.6324	414.819	-322.997	-28.39	-367.061	26.3366	-156.641	342.226	-76.7755	-424.975
4.13	-210.993	-377.529	-370.641	103.245	114.994	288.241	-112.966	-47.8206	142.35	-292.916	256.151	381.512	451.362	-164.752	252.296	-111.893	168.939	-341.947	-196.249	-124.951	-353.756	78.2552	307.371	49.5682	348.146			-425.16	14.6442	-57.0078	-347.038	359.269	395.067	-327.134	-457.206	-403.752	243.515	-308.385	-159.577	-22.3784	415.112	-323.916	-28.9734	-368.52	27.0005	-156.117	343.958	-78.1696	-424.923
4.14	-211.515	-378.781	-370.997	103.599	117.093	290.442	-112.926	-47.9222	142.86	-293.156	256.03	383.292	452.097	-164.938	253.051	-111.929	168.706	-342.3	-197.583	-125.158	-353.99	76.0186	308.823	48.5714	348.397			-426.902	14.9333	-57.5194	-349.06	361.265	395.293	-327.427	-457.607	-404.405	243.752	-310.071	-159.796	-21.8274	416.168	-323.514	-29.39	-368.723	26.5812	-158.962	344.092	-77.9558	-426.555
4.15	-211.691	-379.445	-372.212	103.57	116.891	290.864	-113.874	-49.9933	143.402	-294.86	255.722	385.167	453.332	-165.901	253.907	-113.982	167.884	-343.703	-197.475	-125.248	-355.098	76.7653	309.557	48.714	350.028			-427.357	14.8079	-58.1369	-349.086	360.85	395.139	-328.696	-458.792	-405.285	244.595	-310.058	-160.1	-21.2519	416.989	-324.183	-30.3718	-370.707	27.2792	-158.739	345.34	-79.5487	-426.092
4.16	-212.209	-381.113	-372.657	103.709	117.954	293.082	-113.759	-49.5858	144.17	-295.364	255.129	384.346	454.013	-164.293	254.55	-113.785	167.977	-344.046	-198.386	-124.994	-355.942	74.5006	311.048	47.887	350.118			-429.265	15.4313	-58.6716	-350.622	362.338	395.42	-328.863	-458.658	-406.943	244.847	-312.104	-160.119	-20.7762	417.695	-323.541	-30.6638	-370.862	26.8105	-160.114	346.464	-80.387	-427.482
4.17	-212.39	-381.41	-374.277	104.029	118.838	293.396	-114.783	-51.9492	144.398	-296.06	255.152	386.264	455.602	-166.429	255.535	-116.378	167.227	-345.296	-199.109	-125.936	-356.163	74.2822	311.832	46.9448	351.239			-429.732	15.2322	-59.4128	-352.058	362.569	395.338	-330.333	-460.08	-407.117	245.234	-312.409	-160.492	-20.1256	419.302	-323.823	-31.6294	-371.943	27.4097	-161.536	346.19	-80.6099	-427.752
4.18	-212.764	-383.307	-374.327	103.926	118.722	295.346	-114.79	-52.3658	145.113	-297.307	254.433	387.45	455.846	-166.583	256.235	-115.965	166.823	-345.802	-199.077	-125.957	-357.429	73.4024	313.211	47.4638	351.557			-431.351	15.996	-59.7392	-352.513	363.127	395.273	-330.594	-459.876	-408.823	245.698	-313.854	-160.552	-19.8287	419.892	-323.327	-31.6914	-372.623	26.9948	-161.307	348.171	-82.6789	-428.207
4.19	-213.136	-383.565	-376.359	104.32	120.147	296.063	-115.547	-53.1992	145.372	-297.799	254.373	386.06	457.872	-169.745	257.099	-118.787	166.037	-347.048	-200.593	-126.126	-357.03	71.7484	313.733	45.7688	352.834			-432.459	15.7086	-60.9167	-353.971	364.033	395.67	-331.876	-460.761	-409.38	246.046	-315.068	-160.809	-18.8777	421.263	-323.616	-32.3801	-373.647	27.5801	-163.645	347.727	-82.311	-429.234
4.2	-213.363	-385.578	-375.777	104.368	119.675	297.095	-115.813	-54.1201	145.811	-298.92	253.931	387.617	457.675	-169.27	258.086	-118.626	165.219	-347.3	-200.338	-127.056	-358.839	71.9428	315.415	45.8671	352.921			-433.847	16.2862	-60.7828	-354.385	364.118	395.798	-332.34	-461.051	-410.334	246.458	-315.242	-161.746	-18.8195	421.033	-323.196	-32.37	-374.859	27.08	-163.576	349.902	-83.9512	-428.997
4.21	-213.606	-385.64	-378.164	104.649	121.599	298.687	-116.562	-55.0252	146.196	-299.412	253.628	388.16	460.046	-172.309	258.647	-121	164.814	-348.776	-201.771	-126.928	-358.594	69.9778	316.047	45.3137	354.595			-435.216	16.1159	-62.3106	-356.143	365.568	396.632	-333.08	-461.806	-411.759	246.664	-316.64	-161.559	-17.8745	422.032	-323.365	-33.1541	-375.302	27.606	-165.138	350.363	-84.62	-430.448
4.22	-213.819	-387.883	-377.628	104.67	121.345	299.093	-117.746	-56.089	146.218	-300.268	253.128	388.032	459.912	-173.048	259.663	-121.666	163.54	-349.185	-201.622	-127.633	-359.588	70.0886	317.423	44.67	354.864			-435.946	16.2169	-62.0183	-356.245	365.417	396.615	-334.459	-462.442	-411.979	247.235	-316.706	-161.694	-17.6378	422.102	-322.988	-32.8194	-376.83	27.5004	-165.422	351.137	-84.7918	-429.94
4.23	-214.141	-388.124	-379.641	104.953	122.572	301.363	-117.413	-56.8746	146.679	-301.855	252.75	389.368	461.904	-174.313	260.231	-122.235	163.514	-350.44	-202.681	-127.85	-360.169	67.9762	318.339	44.4828	355.99			-437.765	16.2409	-63.6055	-358.42	366.505	397.665	-334.143	-462.921	-413.717	247.926	-318.482	-162.117	-16.9421	422.006	-323.276	-33.5789	-377.004	27.7663	-166.459	352.182	-86.3299	-431.673
4.24	-214.295	-389.736	-380.214	105.11	123.729	301.286	-119.182	-58.4774	146.171	-302.406	252.483	390.187	461.966	-175.783	261.45	-123.752	162.219	-351.09	-202.861	-128.077	-360.208	68.3786	319.267	43.6608	356.237			-438.443	16.3388	-63.7633	-358.361	367.294	397.494	-336.268	-463.932	-414.022	248.152	-318.29	-162.994	-16.71	423.093	-322.794	-33.6272	-378.419	27.6834	-166.925	352.917	-85.8296	-431.203
4.25	-214.585	-390.28	-381.603	105.222	123.923	303.884	-119.156	-58.8022	145.99	-303.669	252.036	390.266	463.934	-176.278	262.233	-123.686	162.222	-351.712	-203.553	-128.834	-361.558	66.6278	320.396	43.1569	357.822			-440.49	16.4346	-65.0045	-360.431	367.2	398.591	-336.064	-463.922	-415.365	248.861	-320.504	-162.978	-16.0559	422.364	-323.136	-34.0236	-378.569	27.5702	-167.694	354.373	-87.4486	-432.89
4.26	-214.641	-391.79	-382.048	105.551	124.681	303.699	-120.038	-60.3026	145.485	-305.08	251.882	392.622	464.133	-177.947	262.855	-125.933	161.41	-352.706	-204.472	-128.427	-361.918	66.2648	320.895	42.92	358.155			-441.105	16.559	-65.0672	-360.172	368.115	398.452	-337.606	-465.057	-416.76	249.487	-320.17	-164.378	-15.8358	423.112	-322.676	-34.7201	-379.62	27.7213	-168.841	354.312	-88.2282	-432.932
4.27	-214.822	-392.288	-383.241	105.659	125.444	306.109	-120.528	-60.4422	145.44	-305.43	251.48	392.078	466.279	-178.466	263.823	-125.811	161.059	-353.495	-204.24	-129.596	-362.111	65.4475	322.386	41.4277	360.245			-443.265	16.5113	-66.332	-362.427	368.618	399.296	-338.069	-464.93	-417.293	249.628	-322.747	-164.248	-15.0676	422.636	-323.044	-34.8342	-379.573	27.4973	-168.875	356.123	-88.5644	-433.716
4.28	-214.772	-393.591	-384.255	105.932	125.601	306.082	-120.975	-62.6654	145.305	-307.276	251.475	393.4	466.437	-180.32	264.404	-128.633	159.753	-354.11	-205.912	-129.135	-363.413	64.308	323.074	41.7805	360.86			-443.597	16.6396	-66.658	-361.962	369.156	399.275	-338.94	-466.409	-419.371	250.318	-322.328	-164.771	-14.9392	423.142	-322.679	-35.5513	-381.226	27.6196	-170.825	356.531	-89.6592	-434.674
4.29	-214.811	-394.352	-385.337	106.101	127.431	308.442	-121.479	-62.8757	145.194	-307.872	250.911	394.751	468.121	-180.563	265.615	-128.173	159.835	-355.014	-205.54	-130.165	-363.36	64.0666	324.46	40.1959	362.586			-445.601	16.7132	-67.831	-364.327	370.838	399.951	-339.7	-466.699	-419.828	250.514	-325.128	-165.459	-14.2555	422.78	-323.309	-35.4472	-380.865	27.2192	-170.603	357.78	-90.3768	-434.648
4.3	-214.725	-395.571	-385.855	106.229	127.365	308.662	-121.97	-64.5302	145.058	-308.934	251.025	394.301	468.742	-182.837	265.858	-131.38	158.134	-355.843	-206.66	-129.68	-363.888	62.2955	324.954	39.9396	363.024			-445.926	16.7197	-68.0136	-363.963	370.061	399.913	-340.425	-467.421	-421.409	250.877	-324.929	-165.38	-13.9679	423.808	-322.876	-36.3239	-382.729	27.485	-171.952	357.972	-90.1822	-436.397
4.31	-214.644	-396.654	-386.953	106.273	128.072	310.512	-122.604	-65.2549	144.837	-310.466	250.914	396.648	469.731	-182.833	267.512	-130.977	158.349	-356.698	-207.366	-130.59	-365.23	62.3849	326.17	39.8021	364.664			-448.393	16.622	-69.1056	-365.115	371.386	400.616	-341.649	-468.415	-422.522	251.477	-327.247	-166.446	-13.4911	423.568	-323.666	-36.2544	-382.407	27.0613	-173.022	359.527	-92.2598	-435.923
4.32	-214.63	-397.307	-387.798	106.291	129.025	311.343	-122.888	-65.7581	144.689	-310.73	250.539	396.372	470.864	-185.23	267.414	-133.362	156.604	-357.276	-207.281	-130.475	-365.129	60.482	326.677	37.721	365.03			-448.293	16.6591	-69.727	-367.19	372.256	400.921	-341.833	-468.289	-423.171	251.537	-327.789	-166.273	-13.0892	424.462	-323.745	-37.2353	-384.3	27.3769	-173.156	359.959	-91.8964	-437.831
4.33	-214.29	-398.744	-388.353	106.712	128.988	312.411	-124.128	-67.5194	144.212	-312.326	250.919	397.276	471.446	-185.048	268.644	-133.671	156.77	-358.054	-208.927	-130.93	-366.717	60.5537	328.087	38.0575	367.294			-451.03	16.5439	-70.0362	-366.792	372.323	401.234	-343.627	-469.629	-425.228	252.026	-328.439	-166.784	-12.6564	424.295	-323.931	-37.0391	-384.156	26.9671	-175.194	361.22	-94.2155	-437.601
4.34	-214.448	-399.19	-390.173	106.551	129.817	314.024	-123.938	-67.6192	144.075	-313.535	250.767	399.441	473.347	-187.391	269.455	-135.492	155.211	-358.64	-208.414	-131.056	-366.629	59.3663	328.44	36.5282	367.694			-450.605	16.6475	-71.4934	-368.815	373.703	402.096	-343.285	-469.36	-425.469	252.521	-330.072	-167.649	-12.2538	425.214	-324.358	-38.4076	-385.821	27.2699	-175.071	361.935	-94.0351	-439.149
4.35	-213.944	-400.671	-390.276	107.039	130.165	314.362	-125.439	-70.0732	143.695	-314.013	251.021	398.7	473.571	-187.628	269.9	-135.803	154.651	-359.355	-209.869	-131.272	-367.426	58.8018	330.047	36.1486	368.928			-453.436	16.443	-71.3146	-368.591	373.964	402.21	-345.164	-471.054	-427.173	252.524	-330.18	-167.602	-11.9485	425.391	-324.607	-38.2349	-386.344	26.89	-176.678	362.87	-95.502	-439.91
4.36	-213.939	-400.986	-392.049	106.918	130.641	316.481	-125.256	-69.9659	143.475	-315.813	251.163	400.406	475.978	-189.041	270.66	-137.676	154.032	-359.93	-209.663	-131.802	-368.048	58.2119	330.111	35.7625	369.553			-453.146	16.6718	-72.8538	-370.589	375.16	403.527	-344.795	-470.996	-428.089	253.447	-332.355	-168.199	-11.5004	425.999	-324.883	-39.6914	-387.258	27.0606	-176.764	364.022	-96.1964	-440.25
4.37	-213.61	-402.403	-391.993	107.325	131.428	316.423	-126.896	-72.1567	143.184	-316.351	251.424	401.914	475.93	-190.342	271.395	-138.198	152.871	-361.093	-210.564	-131.459	-367.89	57.037	331.829	33.9941	371.205			-455.59	16.37	-72.3748	-370.399	376.388	403.38	-346.606	-472.402	-428.68	253.584	-332.376	-168.74	-11.3177	426.456	-325.197	-39.9578	-388.426	26.6814	-177.872	364.141	-96.7009	-441.701
4.38	-213.462	-402.587	-394.303	107.184	131.523	318.753	-126.879	-72.023	143.007	-317.415	251.439	401.08	478.305	-190.96	271.95	-139.44	152.827	-361.642	-211.59	-132.581	-368.62	57.1339	331.764	34.5562	372.063			-455.523	16.6589	-74.0456	-372.444	376.299	404.968	-346.536	-472.882	-430.486	254.076	-334.592	-168.874	-10.877	426.966	-325.505	-40.7975	-388.739	26.8284	-179.158	366.518	-97.5757	-441.571
4.39	-213.263	-404.067	-393.973	107.556	132.891	318.68	-128.195	-73.194	142.905	-317.905	251.321	403.293	478.213	-192.159	272.904	-140.764	151.889	-362.618	-211.383	-132.05	-368.948	55.3415	333.69	32.5573	373.014			-457.876	16.4916	-73.517	-372.615	378.721	404.76	-348.191	-473.09	-431.04	254.62	-335.183	-169.615	-10.8254	427.353	-325.878	-41.5787	-389.624	26.4828	-179.197	366.051	-98.8535	-443.044
4.4	-213.166	-404.154	-396.22	107.505	132.55	320.76	-128.535	-74.2398	142.944	-318.659	251.528	404.44	480.509	-192.571	273.369	-141.406	151.896	-363.161	-213.17	-132.649	-369.183	55.7743	333.733	32.3215	374.551			-458.119	16.7483	-74.9772	-374.097	378.75	406.713	-348.469	-474.18	-432.012	255.079	-336.563	-170.186	-10.2416	427.902	-326.45	-41.945	-389.887	26.6347	-180.716	368.134	-99.2118	-442.909
4.41	-213.119	-405.908	-396.204	107.601	133.572	320.813	-128.59	-74.7377	143.102	-319.928	251.418	403.973	480.642	-194.094	274.432	-143.24	150.876	-364.121	-212.995	-133.02	-370.273	54.2888	335.337	31.7628	375.233			-460.099	16.5787	-74.6814	-375.37	379.532	406.701	-348.527	-474.038	-433.72	255.855	-338.046	-169.66	-10.247	428.49	-327.287	-43.2196	-391.053	26.3213	-180.691	369.245	-100.951	-443.88
4.42	-213.022	-405.914	-398.258	107.813	133.829	322.543	-129.772	-76.48	143.073	-320.362	251.553	405.916	482.509	-194.218	274.54	-143.21	151.036	-364.746	-214.426	-132.61	-369.908	53.3464	335.352	30.0082	376.157			-460.896	16.7905	-75.863	-375.594	380.842	408.678	-350.418	-475.296	-433.966	256.233	-338.241	-170.81	-9.6624	428.921	-327.602	-43.1164	-391.091	26.4274	-182.034	369.274	-100.614	-444.564
4.43	-213.547	-407.963	-398.242	107.528	134.176	322.838	-129.883	-76.5563	143.406	-321.507	251.664	406.7	483.109	-196.412	275.556	-145.377	149.287	-365.725	-214.726	-132.734	-371.571	53.4827	336.897	30.4222	377.042			-462.062	16.8412	-75.7319	-377.962	380.678	408.937	-350.161	-475.38	-436.14	256.861	-340.099	-171.234	-9.46152	429.782	-328.821	-44.795	-392.903	26.1889	-182.22	371.775	-102.674	-444.575
4.44	-213.735	-407.995	-400.249	107.924	134.679	324.424	-130.936	-78.5243	143.382	-322.867	251.81	406.694	484.392	-196.362	275.873	-145.25	149.746	-366.167	-215.519	-132.746	-371.695	51.1832	337.129	28.3812	378.876			-463.878	17.0016	-76.3858	-377.588	382.314	410.485	-351.685	-476.637	-436.6	257.8	-339.959	-171.067	-9.1188	429.861	-328.921	-44.4653	-392.596	26.3683	-183.165	371.706	-102.496	-445.81
4.45	-213.815	-409.985	-400.831	107.628	135.242	325.166	-130.949	-78.457	143.534	-323.478	252.179	407.658	485.424	-198.419	277.132	-147.382	147.634	-367.136	-216.488	-132.424	-372.27	51.78	338.487	28.4744	379.111			-464.248	17.1463	-76.6766	-380.059	382.583	410.988	-351.588	-476.866	-438.034	258.093	-342.315	-171.947	-8.60196	430.737	-330.383	-46.3423	-394.315	26.3464	-183.871	373.57	-103.589	-445.526
4.46	-214.346	-410.265	-402.221	107.879	135.413	326.041	-132.311	-79.995	143.753	-324.985	252.145	408.608	486.285	-199.217	277.481	-147.063	147.969	-367.877	-216.675	-132.751	-373.233	50.1306	339.216	27.5238	381.194			-466.818	17.0959	-76.5216	-379.669	383.361	411.875	-353.688	-477.405	-439.548	258.969	-342.468	-172.148	-8.3664	430.908	-330.335	-45.8864	-394.17	26.1737	-184.065	374.175	-104.532	-446.344
4.47	-214.302	-411.772	-402.948	107.805	136.026	327.285	-132.264	-80.2386	143.808	-325.83	252.413	408.58	487.754	-200.069	278.374	-149.355	146.324	-368.829	-218.367	-132.276	-373.338	49.2378	340.113	26.187	381.326			-466.597	17.255	-76.7592	-382.119	385.515	412.953	-353.419	-477.668	-439.832	259.567	-344.281	-172.318	-7.56732	431.408	-331.718	-47.9912	-395.628	26.3184	-185.538	375.672	-104.724	-446.916
4.48	-215.055	-412.083	-404.314	107.798	135.772	327.91	-133.286	-82.4915	144.231	-326.447	252.38	410.5	488.181	-201.526	278.863	-149.113	145.685	-370.018	-218.143	-132.395	-374.101	49.0704	341.079	26.5838	382.639			-469.259	17.2022	-76.7872	-382.249	385.034	413.648	-354.974	-478.789	-441.608	259.858	-344.352	-173.697	-7.61592	431.845	-331.879	-47.5794	-396.164	26.0519	-185.145	376.632	-105.664	-447.092
4.49	-214.996	-413.662	-405.767	107.819	136.84	329.309	-133.87	-82.7292	144.404	-328.183	252.655	409.99	489.92	-201.805	279.555	-151.193	145.029	-370.505	-219.771	-132.178	-374.619	46.8971	342.085	24.2054	382.982			-469.494	17.417	-77.3248	-383.933	387.465	414.76	-355.985	-478.957	-442.172	260.895	-346.443	-173.627	-6.62772	432.231	-332.973	-49.4765	-396.788	26.352	-187.048	377.307	-106.192	-447.867
4.5	-215.395	-414.096	-406.68	107.807	136.427	329.691	-134.124	-84.1736	144.685	-328.685	252.698	411.533	490.138	-202.985	280.198	-151.337	143.721	-371.87	-220.108	-131.901	-374.928	47.5426	342.955	24.5252	384.895			-470.737	17.2879	-77.3495	-384.524	387.812	415.233	-356.308	-479.925	-443.232	261.195	-347.11	-174.673	-6.80448	432.616	-333.297	-49.9124	-398.105	25.9862	-187.006	378.975	-106.794	-447.891
4.51	-215.737	-415.436	-408.411	108.027	137.015	331.446	-135.472	-85.5646	145.246	-329.734	252.517	412.322	492.092	-203.117	280.62	-152.716	143.744	-372.26	-220.857	-132.23	-375.99	45.0505	343.903	23.2668	385.375			-471.373	17.5459	-77.8356	-385.873	388.219	416.272	-357.884	-480.362	-444.836	261.842	-348.161	-175.029	-5.57844	433.206	-333.955	-50.6442	-398.171	26.0964	-188	378.824	-107.903	-448.485
4.52	-215.927	-415.989	-408.738	107.841	137.411	331.556	-135.337	-85.5834	145.456	-331.265	252.71	412.298	492.011	-205.035	281.423	-153.754	141.979	-374.049	-221.677	-131.519	-375.974	45.5413	344.93	21.9565	387.235			-472.732	17.5061	-77.8674	-386.689	389.827	416.669	-357.89	-480.798	-445.288	262.707	-349.584	-175.304	-5.8266	433.646	-334.642	-51.3469	-399.87	25.9216	-188.99	381.184	-107.853	-448.535
4.53	-216.291	-417.17	-410.652	108.016	137.593	333.493	-136.834	-87.4824	146.034	-331.495	252.476	414.664	494.27	-204.692	282.023	-155.129	142.249	-374.045	-221.966	-131.986	-377.556	43.6229	345.721	22.1728	388.184			-473.176	17.6285	-78.4075	-387.852	389.563	417.554	-359.748	-481.816	-446.807	262.797	-350.012	-176.787	-4.45536	433.858	-335.121	-51.6985	-399.831	25.9831	-189.057	381.231	-109.547	-448.912
4.54	-216.642	-418.151	-411.046	108.006	138.244	333.711	-136.558	-87.2516	146.4	-333.151	252.721	414.272	494.165	-207.177	282.707	-156.1	140.403	-376.088	-223.242	-131.691	-377.596	42.583	347.04	19.6477	389.256			-475.284	17.6124	-78.4798	-388.785	391.338	417.811	-359.446	-481.865	-447.751	263.629	-351.146	-176.49	-4.69248	434.548	-335.889	-52.3057	-401.595	25.9669	-191.056	382.558	-109.098	-449.311
4.55	-216.814	-419.169	-412.765	107.863	138.638	335.701	-138.083	-89.7305	146.718	-334.029	252.426	415.775	496.338	-206.826	283.36	-157.544	140.75	-376.003	-223.099	-131.677	-378.729	42.7946	347.347	20.1815	390.771			-475.401	17.7433	-78.7694	-389.387	392.306	418.637	-361.55	-483.597	-448.342	264.128	-351.557	-177.316	-3.3366	434.63	-336.002	-52.7634	-401.448	25.779	-190.408	383.513	-110.759	-449.196
4.56	-217.335	-420.328	-413.276	107.999	138.543	336.185	-138.059	-89.8686	147.27	-334.652	252.633	417.502	496.407	-209.654	283.891	-158.342	138.905	-377.956	-224.253	-131.72	-379.371	39.7964	348.824	18.3284	391.276			-477.686	17.8217	-78.9508	-391.127	392.573	418.897	-361.314	-483.597	-450.289	264.373	-353.343	-178.348	-3.39792	435.483	-336.913	-53.2873	-403.23	26.0311	-192.445	384.055	-110.705	-449.387
4.57	-217.371	-421.212	-415.144	107.853	139.553	337.806	-139.07	-91.3032	147.452	-336.437	252.323	416.697	498.53	-209.121	284.592	-160.125	139.342	-377.971	-224.568	-131.295	-379.637	40.1351	349.775	17.131	393.339			-477.777	17.9365	-79.1422	-390.89	394.614	419.533	-362.893	-484.985	-450.777	265.229	-353.381	-178.079	-2.16264	435.375	-336.797	-53.5728	-402.949	25.7568	-192.6	386.121	-111.387	-449.601
4.58	-218.037	-422.36	-415.371	107.718	139.327	338.796	-139.441	-92.086	147.938	-336.968	252.672	418.891	498.933	-212.169	285.28	-161.123	137.651	-379.743	-225.157	-131.884	-381.085	37.7658	350.742	17.0683	393.429			-479.965	17.941	-79.3543	-393.363	394.668	419.984	-363.501	-484.978	-452.141	265.462	-355.642	-179.034	-1.99224	435.899	-337.781	-53.868	-404.944	26.0251	-193.384	385.905	-111.997	-449.653
4.59	-217.832	-423.223	-417.445	107.744	139.988	339.726	-139.673	-92.5338	148.398	-338.134	252.468	419.833	500.72	-212.078	286.173	-162.576	137.86	-380.221	-226.185	-131.332	-381.136	37.1513	351.614	15.329	395.532			-480.181	17.9942	-79.4974	-392.865	395.242	420.413	-363.958	-485.798	-453.494	265.999	-355.476	-179.478	-0.79464	435.923	-337.682	-54.1423	-404.752	25.9016	-194.778	387.93	-111.889	-449.776
4.6	-218.492	-424.455	-417.637	107.307	140.27	341.216	-140.914	-93.6692	148.625	-339.675	252.724	419.738	501.369	-213.875	286.831	-163.962	136.45	-381.141	-226.205	-131.828	-382.284	36.0556	352.728	15.1758	396.1			-481.58	18.1031	-79.7914	-395.07	396.728	420.91	-365.528	-486.516	-453.996	266.77	-357.826	-179.379	-0.54984	435.641	-338.496	-54.3702	-406.563	25.9085	-194.408	387.693	-113.157	-449.878
4.61	-218.482	-425.051	-419.874	107.232	140.457	341.966	-140.526	-94.3358	149.227	-340.051	253.02	422.22	502.692	-215.453	287.7	-164.871	136.276	-383.253	-227.634	-131.57	-382.923	34.6343	353.169	14.2549	397.362			-482.493	18.1571	-79.8214	-395.28	396.765	421.247	-365.381	-487.176	-455.846	266.931	-357.999	-180.411	0.42804	435.904	-338.483	-54.5478	-406.525	26.1977	-196.592	389.588	-113.253	-449.843
4.62	-218.997	-426.563	-419.614	106.94	141.386	343.763	-142.095	-95.7654	149.418	-341.72	252.752	421.857	503.937	-215.851	288.488	-166.479	135.223	-383.006	-227.488	-131.94	-383.328	34.4713	354.185	13.2834	398.705			-483.126	18.3292	-80.2115	-396.253	398.999	420.906	-367.218	-488.223	-456.423	267.754	-359.244	-180.322	1.04424	435.552	-339.282	-54.716	-408.27	25.9657	-196.098	389.533	-114.147	-449.98
4.63	-219.451	-427.3	-422.188	106.506	141.166	344.488	-141.673	-96.2282	149.655	-342.691	253.05	422.887	504.618	-217.608	289.256	-167.012	134.719	-385.423	-228.516	-132.333	-384.874	32.3948	354.615	13.0026	399.312			-484.298	18.4111	-80.2273	-398.168	398.632	421.038	-366.987	-488.51	-457.326	268.163	-360.426	-180.711	1.51908	435.618	-339.272	-54.8238	-408.945	26.271	-197.886	391.004	-116.077	-450.165
4.64	-219.969	-428.49	-422.002	106.427	142.165	346.093	-143.434	-97.48	149.816	-343.36	252.779	425.242	506.276	-217.518	289.962	-169.436	134.219	-385.077	-229.381	-132.236	-384.674	32.8565	355.566	11.356	401.141			-485.157	18.6816	-80.5552	-398.043	401.198	421.353	-368.904	-489.615	-459.004	268.603	-360.731	-181.565	2.20392	435.277	-339.948	-55.1744	-409.684	25.9948	-199.292	391.696	-115.478	-450.03
4.65	-220.577	-429.632	-424.7	105.924	142.385	346.489	-143.24	-97.7232	149.929	-345.215	252.988	424.488	506.622	-220.349	290.863	-169.29	133.146	-387.344	-229.365	-133.002	-386.208	30.9078	355.994	11.627	401.281			-486.509	19.0133	-80.6268	-399.872	401.182	421.333	-368.921	-489.899	-459.175	269.527	-362.151	-181.3	2.6892	435.534	-340.032	-54.7334	-411.469	26.3238	-199.117	391.027	-117.988	-450.577
4.66	-220.939	-430.462	-424.072	105.834	142.586	348.694	-144.171	-98.8718	149.963	-345.728	252.597	426.202	508.741	-220.379	291.432	-170.933	132.981	-387.206	-230.677	-133.756	-385.973	30.7835	356.806	9.51048	403.313			-487.316	19.1178	-80.849	-399.465	402.679	422.318	-370.076	-491.13	-461.277	269.717	-362.196	-181.962	3.30396	435.375	-340.636	-55.2145	-411.537	25.9154	-201.759	392.987	-118.165	-450.413
4.67	-221.715	-431.884	-426.948	105.363	143.244	349.059	-144.84	-98.9544	149.717	-347.045	252.846	427.108	508.74	-222.912	293.58	-171.592	131.492	-389.395	-230.425	-133.612	-387.048	29.4956	357.057	9.43872	403.369			-489.068	19.6121	-81.0511	-401.782	404.009	422.435	-370.775	-491.287	-461.695	270.341	-364.42	-182.408	3.50388	435.649	-341.699	-55.1209	-413.688	26.2885	-201.411	392.886	-119.003	-450.778
4.68	-221.916	-432.759	-426.778	105.246	143.244	351.086	-144.819	-100.595	149.543	-348.367	252.606	427.109	511.229	-222.756	293.373	-172.729	131.86	-389.474	-231.458	-134.807	-387.239	28.346	357.921	8.93748	405.635			-489.615	19.8221	-81.167	-401.038	404.224	423.391	-371.239	-493.058	-463.16	271.068	-364.268	-182.173	4.1994	435.831	-341.399	-54.8933	-413.266	26.0812	-203.403	394.76	-120.057	-451.029
4.69	-222.871	-434.015	-429.052	104.762	143.259	351.672	-145.918	-100.622	149.237	-348.699	252.892	429.399	511.062	-224.972	295.293	-173.568	130.072	-391.029	-231.906	-134.701	-387.894	28.2407	358.012	6.58368	405.803			-491.63	20.2914	-81.4328	-403.564	404.792	423.749	-372.368	-492.936	-464.43	271.296	-366.711	-183.166	4.42908	435.694	-342.184	-54.7039	-415.671	26.0512	-204.316	395.259	-120.342	-450.995
4.7	-222.787	-434.843	-429.204	104.532	143.886	353.381	-145.867	-102.699	149.13	-350.493	252.77	428.77	513.446	-225.407	295.533	-175.33	130.304	-391.886	-231.96	-135.767	-388.272	26.1966	358.901	7.2294	407.838			-491.72	20.506	-81.4788	-403.186	406.494	424.428	-372.596	-495.132	-465.043	272.218	-366.43	-182.796	5.03496	436.258	-342.758	-54.3544	-415.292	25.9891	-204.501	396.438	-121.575	-451.549
4.71	-223.496	-436.131	-430.961	104.556	143.849	354.201	-147.01	-102.422	148.629	-351.015	253.098	430.343	513.301	-226.207	296.517	-175.995	128.633	-392.647	-232.904	-135.837	-388.692	26.7966	359.119	5.4048	408.195			-494.267	21.0246	-82.0304	-404.858	406.081	424.915	-374.094	-494.929	-466.649	272.601	-368.933	-183.359	5.17032	435.695	-342.806	-54.3726	-417.363	25.9546	-206.72	397.256	-121.798	-451.22
4.72	-223.609	-436.823	-431.672	104.138	143.986	355.405	-146.76	-104.419	148.521	-352.06	253.032	432.017	515.677	-227.348	297.185	-177.558	128.541	-394.207	-232.601	-136.436	-389.23	24.527	359.935	5.1252	409.588			-494.156	21.2576	-82.1988	-406.71	407.433	425.376	-373.91	-496.453	-466.932	273.236	-368.532	-184.113	5.77356	436.057	-343.718	-54.1985	-417.389	26.043	-206.373	398.249	-123.047	-452.057
4.73	-223.896	-437.933	-433.275	104.423	145.046	356.755	-148.34	-104.539	148.234	-353.6	253.579	431.505	515.556	-228.001	298.123	-178.634	127.553	-394.437	-233.777	-137.119	-389.735	24.5899	360.032	4.50384	410.285			-496.474	21.6823	-82.8868	-405.688	408.458	426.202	-376.138	-496.935	-468.033	274.186	-371.492	-183.765	6.00552	435.777	-343.695	-54.2522	-418.623	25.8594	-208.265	399.552	-123.707	-451.931
4.74	-223.998	-439.05	-434.392	105.33	144.571	357.452	-148.199	-105.506	147.891	-353.947	253.568	434.005	517.743	-229.217	298.906	-180.07	126.64	-396.772	-233.616	-137.153	-390.062	23.1631	360.722	3.47688	410.728			-496.707	22.0645	-83.2069	-408.404	408.283	426.5	-376	-497.292	-468.996	274.263	-371.325	-184.899	6.54828	435.904	-344.558	-53.8855	-419.57	26.0347	-208.497	400.04	-124.455	-452.477
4.75	-224.304	-439.83	-435.407	105.091	145.848	359.303	-149.032	-106.936	147.663	-355.714	254.068	433.954	517.764	-230.067	299.533	-180.913	126.276	-396.357	-234.323	-138.285	-390.587	22.5038	360.647	3.09168	410.029			-498.083	22.3818	-83.5878	-408.283	410.372	427.753	-377.525	-498.159	-469.354	275.236	-372.99	-184.733	6.57528	435.925	-344.548	-54.2384	-420.037	25.7236	-209.533	401.508	-126.439	-452.608
4.76	-224.141	-441.073	-436.7	105.324	146.001	359.656	-149.592	-107.663	147.219	-356.202	254.298	434.718	520.038	-231.758	300.299	-181.684	125.173	-398.86	-234.95	-137.804	-390.668	22.0751	361.183	2.14212	409.803			-498.464	22.8874	-83.9399	-409.84	410.464	427.793	-377.931	-498.475	-470.463	275.523	-373.716	-185.122	7.21584	436.048	-345.338	-53.7721	-421.39	25.8336	-210.506	401.68	-126.326	-452.74
4.77	-224.685	-441.669	-437.79	105.57	146.455	361.666	-149.935	-109.372	146.939	-357.251	254.493	436.865	520.21	-232.425	301.333	-183.167	124.955	-398.737	-234.717	-139.287	-391.343	20.4353	360.87	1.47612	409.778			-500.162	23.2464	-84.2028	-409.905	411.416	429.297	-378.527	-499.625	-470.83	275.926	-374.362	-186.336	7.5846	436.104	-346.172	-54.0842	-421.461	25.7029	-210.466	403.52	-128.897	-453.542
4.78	-224.471	-443.232	-439.211	105.54	147.186	361.699	-150.941	-109.806	146.707	-358.098	254.968	436.116	522.067	-234.137	301.196	-183.157	123.57	-400.683	-236.423	-138.72	-391.13	20.8192	360.868	1.12704	409.675			-500.287	23.7886	-84.4763	-411.246	412.897	429.238	-380.462	-499.693	-471.341	276.726	-375.602	-185.896	8.1942	436.273	-346.251	-53.7055	-423.341	25.6154	-212.569	403.561	-128.224	-453.537
4.79	-225.175	-443.649	-440.059	105.873	147.486	363.832	-150.756	-111.393	146.169	-358.744	255.075	437.637	522.773	-235.068	302.423	-185.568	123.713	-401.413	-236.201	-140.189	-391.918	18.4847	360.886	-0.89664	409.573			-502.435	24.0071	-84.5812	-412.977	412.807	430.768	-379.942	-500.551	-472.294	276.924	-376.508	-186.672	8.30976	436.424	-347.058	-53.7302	-423.036	25.5271	-212.12	405.489	-130.518	-455.195
4.8	-225.01	-445.105	-442.259	105.802	147.593	363.682	-152.119	-111.707	146.046	-359.757	255.419	439.41	523.908	-236.692	302.515	-185.163	122.378	-402.464	-237.323	-139.693	-391.989	18.9728	360.808	-0.33048	409.483			-502.404	24.5155	-84.9949	-413.005	413.871	430.557	-382.369	-500.474	-472.372	277.512	-378.142	-187.62	8.6862	436.617	-347.806	-53.3131	-424.965	25.2808	-213.56	405.459	-130.855	-454.621
4.81	-225.688	-445.419	-442.285	106.099	148.157	365.793	-151.852	-113.543	145.5	-360.213	255.57	438.844	525.259	-237.279	303.364	-188.274	122.277	-403.363	-238.031	-140.927	-392.533	18.4201	361.005	-2.62284	409.344			-504.798	24.8208	-84.9542	-414.902	414.603	432.389	-382.162	-501.265	-473.528	277.878	-378.925	-187.069	9.48672	436.793	-348.124	-53.619	-424.529	25.2889	-214.564	407.158	-132.015	-456.143
4.82	-225.568	-447.02	-445.023	106.166	148.128	365.739	-152.761	-113.543	145.165	-361.55	255.817	440.539	525.811	-239.551	303.768	-188.021	121.117	-404.231	-238.246	-141.247	-393.172	17.6448	361.064	-2.79432	409.15			-504.592	25.2792	-84.9833	-414.674	415.187	432.169	-383.324	-501.02	-473.998	278.509	-380.474	-187.931	9.57936	437.27	-349.178	-53.5084	-426.591	24.8918	-214.46	407.946	-133.531	-456.78
4.83	-226.161	-447.059	-444.643	106.466	148.977	367.757	-153.413	-115.965	144.979	-362.593	255.939	441.464	527.516	-239.726	304.224	-190.709	121.071	-405.112	-239.457	-141.257	-393.005	16.9162	361.126	-3.6936	408.994			-507.071	25.4195	-84.8638	-416.991	417.185	433.962	-384.422	-501.966	-474.278	279.063	-381.024	-188.606	10.4616	437.506	-349.366	-53.8338	-426.159	24.9715	-216.287	408.302	-133.855	-457.229
4.84	-226.097	-449.091	-447.65	106.609	148.786	368.026	-153.294	-115.741	144.475	-363.096	256.187	441.442	527.553	-241.774	304.494	-190.45	119.85	-406.307	-239.816	-142.962	-393.84	15.7288	361.072	-5.55588	408.749			-506.772	25.9434	-84.6911	-416.698	416.744	434.029	-384.475	-501.986	-475.573	279.217	-383.115	-188.514	10.6067	437.978	-350.535	-53.5879	-428.125	24.5017	-215.929	410.449	-134.713	-458.584
4.85	-226.762	-449.152	-447.216	106.962	150.082	369.886	-154.53	-118.079	144.756	-364.711	255.971	444.011	529.504	-242.247	304.886	-193.391	119.869	-407.028	-239.952	-142.285	-393.925	15.7049	361.137	-5.33628	408.603			-509.444	26.0552	-84.5646	-418.915	419.159	435.592	-385.492	-502.819	-475.762	279.904	-383.146	-189.816	11.7307	438.44	-350.578	-54.3397	-427.513	24.4976	-216.881	410.09	-135.607	-458.45
4.86	-226.864	-451.245	-450.001	107.249	150.137	370.207	-154.479	-118.07	144.423	-365.307	256.343	443.874	529.52	-243.315	304.955	-193.094	118.085	-407.941	-241.297	-144.23	-394.253	13.9042	361.01	-6.70704	408.367			-509.146	26.5776	-84.4886	-418.625	419.506	435.865	-385.85	-503.187	-476.992	280.194	-384.428	-189.725	11.4852	438.586	-351.833	-54.3757	-429.817	24.0454	-217.638	412.414	-135.834	-460.694
4.87	-227.351	-451.253	-449.67	107.688	150.548	371.652	-155.416	-119.606	145.585	-366.188	256.547	444.664	531.655	-243.927	305.236	-195.681	118.404	-409.064	-241.077	-143.932	-395.26	14.3368	361.329	-7.27368	408.138			-511.414	26.7176	-84.135	-420.974	419.967	437.545	-386.303	-503.46	-477.352	280.524	-384.869	-190.082	12.7528	439.273	-352.1	-54.9457	-429.394	23.7238	-217.689	412.345	-138.044	-460.045
4.88	-227.651	-453.528	-451.924	107.786	151.156	372.279	-155.688	-120.323	145.459	-366.955	256.788	446.698	531.794	-245.386	304.828	-196.118	116.646	-409.74	-242.234	-144.648	-395.119	13.0018	361.151	-7.47696	407.863			-511.888	27.1457	-84.2778	-420.518	421.464	438.059	-386.747	-503.844	-477.967	281.135	-386.421	-190.924	12.7962	439.321	-354.028	-55.468	-429.725	23.5577	-218.903	413.519	-137.946	-462.136
4.89	-227.636	-453.405	-451.62	108.262	151.426	373.445	-156.405	-121.909	146.395	-367.549	256.966	446.141	533.245	-245.55	304.715	-197.277	115.693	-410.654	-242.695	-145.972	-396.408	12.4901	361.667	-8.98308	407.702			-512.876	27.1852	-83.8518	-422.498	421.325	439.756	-387.317	-504.136	-479.06	281.412	-387.048	-190.91	14.057	439.8	-353.772	-55.444	-430.561	23.1448	-219.059	414.846	-140.12	-462.771
4.9	-227.997	-455.8	-453.924	108.583	152.314	374.28	-157.172	-122.857	146.482	-368.997	256.953	447.881	534.092	-247.75	304.527	-198.231	115.356	-411.628	-243.259	-145.644	-396.21	12.5395	361.417	-8.68056	407.418			-513.798	27.6373	-83.8894	-423.058	423.552	440.527	-388.034	-504.499	-479.552	282.183	-388.653	-191.793	14.365	439.838	-355.295	-56.0723	-430.103	22.8493	-220.111	414.79	-139.928	-462.954
4.91	-227.973	-455.879	-453.864	108.898	152.478	375.073	-157.165	-124.17	146.846	-369.591	257.078	448.809	535.095	-247.711	304.507	-199.067	113.452	-412.61	-244.137	-147.077	-396.862	11.3287	361.882	-10.5481	407.216			-514.923	27.5602	-83.5507	-423.786	423.524	441.594	-388.36	-504.963	-480.873	282.542	-389.448	-192.296	15.2392	440.169	-355.762	-56.0376	-431.078	22.4921	-220.863	416.807	-141.622	-465.313
4.92	-228.348	-458.219	-456.32	109.25	153.115	376.08	-158.522	-125.415	147.137	-370.672	257.065	448.607	536.293	-250.446	304.008	-200.458	113.679	-413.515	-244.356	-147.231	-397.658	11.6329	361.644	-10.1996	407.019			-515.924	27.7916	-83.5031	-425.43	424.704	442.7	-390.066	-505.191	-481.749	283.023	-391.029	-192.273	16.4392	440.14	-356.698	-56.5936	-430.719	22.2584	-221.087	417.008	-142.874	-464.673
4.93	-228.407	-458.383	-456.085	109.308	153.968	376.742	-158.072	-125.833	147.394	-372.193	257.068	450.745	537.077	-250.102	304.151	-201.491	111.3	-414.824	-245.947	-148.111	-397.748	10.468	362.152	-11.6281	406.83			-517.585	27.8375	-83.2807	-424.838	426.592	443.585	-389.494	-505.611	-482.412	283.836	-391.517	-193.279	16.9908	440.209	-357.541	-56.7887	-431.438	21.3799	-223.052	418.556	-143.025	-467.079
4.94	-228.517	-460.471	-458.275	110.267	153.641	378.029	-159.313	-127.837	147.623	-372.412	256.923	450.354	538.071	-252.994	303.749	-203.186	111.651	-415.27	-245.62	-149.045	-398.108	10.2702	361.814	-12.5292	406.687			-518.001	27.8785	-83.0363	-427.731	426.488	444.658	-391.845	-506.036	-483.888	284.017	-392.905	-193.301	18.1846	440.208	-359.165	-57.3194	-431.419	21.4775	-222.566	419.65	-144.33	-467.143
4.95	-228.702	-460.748	-458.228	110.179	154.453	378.341	-159.294	-127.718	147.627	-374.505	256.974	451.783	538.746	-252.557	303.645	-203.941	108.918	-417.074	-247.29	-149.128	-398.501	9.89004	362.48	-12.5456	406.435			-520.173	27.8114	-82.7916	-427.298	427.402	445.102	-391.742	-506.279	-484.604	284.829	-394.249	-194.031	18.3356	440.198	-358.971	-57.4505	-431.819	20.327	-224.647	419.681	-145.072	-468.273
4.96	-228.784	-462.737	-459.984	110.822	154.918	380.106	-159.726	-130.347	147.83	-375.17	256.669	452.72	540.03	-255.567	303.412	-206.032	109.329	-416.871	-247.365	-150.52	-398.456	9.13692	362.117	-14.6609	406.22			-520.543	27.834	-82.3442	-429.13	428.687	446.485	-393.084	-507.062	-485.569	285.262	-395.192	-194.552	19.8536	440.22	-360.646	-58.0531	-431.798	20.7454	-224.956	421.944	-145.804	-469.797
4.97	-229.037	-462.802	-460.477	111.166	155.18	380.092	-160.526	-130.107	147.919	-376.05	256.649	452.614	540.508	-255.485	303.646	-206.273	106.845	-419.103	-248.178	-150.666	-399.086	9.13608	362.84	-14.3234	406.016			-522.726	27.6185	-82.1705	-429.699	428.531	446.737	-394.719	-507.119	-487.3	285.564	-396.597	-194.614	19.7273	440.195	-360.665	-58.1173	-431.803	19.4634	-225.531	421.397	-147.109	-469.54
4.98	-229.13	-464.729	-461.896	111.626	156.44	382.12	-160.52	-133.066	148.071	-377.774	256.355	454.811	541.713	-257.982	303.305	-209.284	107.047	-418.951	-249.02	-151.525	-398.986	8.37468	362.593	-15.7973	405.919			-523.182	27.6768	-81.5525	-430.791	431.09	448.153	-394.433	-507.699	-487.781	286.402	-397.115	-195.635	21.3906	440.334	-361.734	-58.5596	-431.975	19.808	-226.644	422.925	-147.481	-472.019
4.99	-229.377	-464.861	-462.351	111.971	156.063	382.07	-161.365	-132.894	148.222	-378.15	256.363	454.208	542.003	-258.08	303.492	-208.986	104.685	-420.733	-248.989	-152.132	-399.947	7.9554	363.592	-16.4023	405.77			-525.293	27.4495	-81.4942	-431.614	430.445	448.179	-396.697	-507.607	-489.277	286.525	-398.123	-195.513	21.2461	440.347	-362.127	-58.6658	-431.779	18.9895	-226.8	423.586	-149.389	-471.523
5	-229.462	-466.804	-463.681	112.312	157.225	384.267	-161.193	-135.408	148.337	-379.603	256.003	455.673	543.216	-259.969	303.261	-212.141	104.824	-420.995	-249.985	-152.331	-399.723	8.20692	363.403	-16.6495	405.428			-525.655	27.5888	-80.7229	-432.282	432.315	449.762	-396.572	-508.303	-490.587	287.236	-398.646	-196.184	22.664	440.332	-362.842	-59.1311	-431.916	18.9684	-227.422	423.52	-149.265	-472.719
5.01	-229.728	-466.685	-464.002	112.786	157.704	384.17	-161.93	-135.611	148.497	-380.675	255.975	457.039	543.925	-260.965	303.546	-211.564	102.475	-422.507	-250.381	-153.822	-400.9	7.26408	364.372	-17.6474	405.299			-527.475	27.3296	-80.9196	-433.47	433.668	449.796	-398.109	-507.952	-490.981	287.633	-400.258	-196.796	22.9994	440.281	-363.268	-58.9412	-431.946	18.564	-228.297	425.805	-151.694	-473.873
5.02	-229.855	-469.079	-465.8	113.087	157.538	386.262	-162.166	-137.112	148.641	-381.11	255.714	456.639	544.973	-262.125	303.409	-214.641	102.211	-423.052	-251.05	-153.742	-400.597	7.878	364.094	-17.8861	405.192			-528.217	27.5122	-79.8181	-433.727	433.767	451.172	-398.916	-508.676	-492.962	288.011	-400.263	-196.75	24.0076	440.055	-363.824	-59.9148	-431.854	18.3169	-228.527	425.187	-151.374	-474.092
5.03	-230.01	-468.915	-465.883	113.737	158.678	386.361	-162.369	-137.547	148.694	-382.601	255.701	459.034	546.069	-263.827	304.333	-214.407	100.7	-424.203	-251.608	-154.548	-401.992	6.78168	364.932	-18.758	405.078			-529.722	27.315	-80.1208	-435.545	434.897	451.314	-399.382	-508.903	-493.373	288.488	-402.411	-197.863	25.0153	439.915	-364.794	-59.5144	-431.979	18.264	-229.637	426.425	-153.808	-475.593
5.04	-230.2	-471.096	-467.679	113.902	158.73	388.378	-163.26	-139.288	148.804	-383.201	255.544	459.494	546.395	-264.598	303.781	-216.796	99.4104	-425.355	-251.857	-155.226	-401.834	7.26072	365.077	-19.3991	404.952			-530.936	27.5396	-79.0096	-435.45	435.535	452.437	-400.82	-509.471	-494.712	288.56	-402.17	-198.017	25.2296	439.463	-364.693	-60.7988	-432.28	17.7884	-229.367	427.622	-153.422	-475.666
5.05	-230.211	-471.028	-467.838	114.57	159.562	389.035	-162.954	-139.694	148.644	-384.449	255.567	459.067	547.875	-266.374	304.886	-216.981	98.8926	-426.044	-253.133	-155.602	-402.854	5.98008	365.528	-19.5437	404.903			-531.894	27.3343	-79.4156	-437.189	436.292	452.795	-400.746	-509.718	-496.02	289.079	-404.823	-197.964	26.4743	439.041	-365.839	-60.4102	-432.321	17.932	-231.138	427.206	-155.164	-477.463
5.06	-230.427	-473.292	-469.901	114.538	160.033	390.491	-164.627	-141.519	148.724	-385.047	255.505	461.635	548.061	-266.911	305.159	-218.498	96.993	-427.242	-253.039	-156.708	-403.427	6.42252	365.616	-21.3736	404.701			-533.269	27.5662	-78.02	-437.015	437.025	453.567	-402.786	-510.245	-496.568	289.12	-404.594	-199.066	26.6797	438.537	-366.17	-61.4616	-432.477	17.532	-230.663	429.215	-156.154	-477.275
5.07	-230.195	-473.427	-469.904	115.554	160.625	392.151	-164.333	-142.354	148.525	-385.92	255.628	462.162	550.104	-268.347	305.835	-219.262	96.7364	-427.953	-254.189	-156.868	-403.97	5.13276	365.828	-21.0084	404.748			-533.864	27.4961	-78.3518	-439.356	437.489	454.029	-402.5	-510.185	-498.212	289.381	-407.194	-199.273	28.0776	438.179	-366.167	-61.5408	-432.58	17.7006	-232.338	428.615	-156.63	-479.035
5.08	-230.452	-475.515	-471.863	115.333	161.954	392.752	-165.572	-143.011	148.435	-387.571	255.453	461.785	549.895	-268.638	306.542	-220.203	94.7795	-428.799	-254.797	-158.119	-404.556	4.8732	366.078	-22.6645	404.865			-535.625	27.6358	-77.012	-439.106	439.287	454.334	-404.165	-510.452	-499.028	290.132	-406.822	-199.291	28.0555	437.578	-366.963	-62.2579	-432.658	17.4391	-232.927	430.37	-157.868	-479.676
5.09	-230.625	-475.505	-471.798	116.062	161.552	395.018	-165.675	-144.613	148.411	-387.946	255.7	463.962	551.92	-270.318	307.538	-220.641	94.68	-429.771	-255.132	-158.436	-405.018	4.38	366.189	-22.7807	404.707			-536.121	27.4042	-77.4202	-441.236	439.004	454.923	-404.467	-510.881	-499.848	290.238	-409.318	-200.304	29.3624	437.07	-366.872	-62.5722	-432.809	17.4978	-233.23	430.579	-158.132	-480.285
5.1	-231.082	-477.712	-474.169	115.918	162.866	395.37	-166.349	-144.64	148.06	-389.454	255.802	464.235	551.936	-270.167	307.836	-222.433	92.4526	-430.744	-256.456	-159.188	-405.366	2.98836	366.442	-23.4887	405.17			-536.529	27.7936	-76.1669	-440.862	441.071	454.995	-405.333	-511.16	-501.581	291.063	-409.171	-200.467	29.6626	436.67	-367.408	-63.3485	-432.841	17.4205	-235.226	430.702	-159.242	-481.762
5.11	-231.501	-478.09	-473.79	116.612	163.27	397.909	-167.253	-147.24	148.005	-390.477	255.81	464.432	553.998	-272.382	308.801	-222.882	92.6897	-431.696	-256.299	-160.983	-406.166	3.52248	366.579	-24.8107	405.05			-536.766	27.7254	-76.4178	-442.78	441.512	455.311	-406.361	-511.924	-502.025	291.534	-411.126	-200.859	30.9642	436.002	-367.008	-63.5765	-432.962	17.3935	-234.706	432.789	-159.796	-481.469
5.12	-231.549	-480.101	-476.177	116.607	163.232	398.273	-167.175	-146.976	147.8	-390.844	256.148	466.404	554.032	-272.192	309.308	-224.93	90.0751	-432.835	-257.851	-160.658	-406.453	1.50144	366.738	-24.579	405.76			-536.882	28.0807	-75.3037	-443.431	441.606	455.346	-406.54	-511.813	-502.973	291.792	-411.536	-201.735	31.1135	435.921	-367.23	-64.3886	-432.962	17.3928	-236.997	432.078	-160.592	-483.477
5.13	-231.668	-480.351	-476.203	116.848	164.042	400.836	-168.634	-150.105	147.291	-392.329	255.94	465.798	555.692	-274.682	310.443	-225.707	90.6724	-433.435	-257.876	-162.86	-407.384	1.9548	366.964	-26.2698	405.716			-537.181	28.0716	-75.6234	-444.226	443.679	455.685	-408.092	-513.004	-504.608	292.671	-412.66	-201.605	32.2933	435.264	-367.31	-64.8208	-432.947	17.1476	-237.156	433.326	-161.968	-483.188
5.14	-231.992	-482.028	-478.257	117.539	163.941	400.925	-168.33	-149.784	147.196	-392.814	256.438	467.811	556.05	-274.311	310.827	-227.275	87.744	-435.209	-258.472	-163.179	-407.527	0.1872	367.064	-25.9705	407.009			-538.872	28.4249	-74.6156	-446.021	443.451	455.607	-407.895	-512.841	-505.076	293.035	-413.621	-202.674	32.6556	435.168	-367.419	-65.0598	-433.209	17.2974	-237.994	433.678	-162.195	-484.965
5.15	-231.95	-482.587	-478.392	117.363	164.581	403.222	-170.199	-152.319	146.492	-393.627	255.994	468.773	557.359	-277.068	312.897	-228.054	88.2853	-435.158	-259.501	-164.101	-408.481	0.0264	367.163	-26.8813	406.61			-538.469	28.5493	-75.08	-446.079	445.342	456.137	-409.831	-513.638	-506.882	293.76	-414.073	-203.143	33.7163	434.666	-368.192	-65.4149	-433.185	17.0568	-239.638	433.748	-164.215	-485.168
5.16	-232.501	-483.936	-480.096	118.124	164.873	403.376	-169.99	-152.71	146.124	-394.376	256.234	468.381	558.142	-276.661	312.547	-229.827	85.9128	-437.487	-259.264	-165.452	-408.217	-0.6642	367.427	-28.2572	406.864			-539.015	28.8276	-74.1072	-447.973	446.274	456.041	-409.403	-514.057	-507.741	294.123	-415.635	-203.132	34.2248	434.939	-367.777	-65.5128	-433.551	17.2562	-239.375	434.549	-163.577	-486.036
5.17	-232.418	-484.725	-480.507	117.76	165.022	405.31	-171.01	-153.485	145.785	-395.01	256.114	470.347	558.596	-279.411	314.352	-231.159	85.7614	-437.217	-260.415	-165.801	-409.459	-2.022	367.417	-27.9041	407.85			-538.909	29.0118	-74.4889	-447.875	446.569	457.042	-410.307	-514.071	-508.507	294.667	-416.019	-203.739	34.7111	433.93	-368.499	-65.9533	-433.571	16.8684	-242.074	434.617	-166.45	-487.257
5.18	-233.482	-486.022	-481.884	118.744	165.722	405.702	-171.686	-155.019	145.033	-396.219	256.252	472.16	560.198	-279.711	314.527	-232.084	84.0697	-439.68	-260.601	-167.961	-409.537	-1.77012	367.749	-29.7708	408.095			-539.15	29.2781	-73.1657	-449.809	448.855	457.108	-411.236	-514.591	-510.105	295.538	-417.614	-204.375	35.4978	434.285	-368.882	-65.6864	-433.924	17.1852	-241.664	435.236	-166.204	-487.067
5.19	-233.36	-486.694	-482.319	118.33	165.972	407.516	-172.034	-155.72	144.783	-396.783	256.328	471.316	560.301	-281.235	315.564	-233.793	83.0255	-439.369	-260.566	-167.689	-410.084	-3.23928	367.679	-29.4926	409.089			-538.853	29.6119	-73.07	-449.593	448.43	457.894	-411.337	-514.687	-510.606	296.013	-418.338	-204.237	35.9128	433.35	-369.035	-65.9243	-434.067	16.8618	-243.173	435.581	-167.976	-489.013
5.2	-234.552	-488.045	-483.475	119.372	165.851	408.359	-172.569	-157.725	144.18	-397.793	256.685	472.835	562.416	-282.115	315.901	-234.081	82.7802	-441.588	-261.2	-169.996	-410.37	-3.29712	367.859	-30.2826	409.774			-539.262	29.8213	-72.5286	-451.944	449.813	458.174	-412.284	-515.465	-511.775	296.793	-420.181	-204.573	36.6964	433.489	-369.537	-65.6015	-434.438	17.0158	-244.101	435.908	-168.984	-488.646
5.21	-234.222	-488.744	-484.058	118.993	166.699	409.653	-173.158	-157.963	143.678	-399.184	256.828	474.581	562.164	-282.66	316.854	-235.912	80.0606	-441.515	-261.072	-169.578	-410.573	-4.14168	367.97	-31.6634	410.666			-538.545	30.0485	-71.9868	-451.617	450.331	458.84	-412.415	-515.564	-513.204	297.921	-420.643	-205.282	37.0082	432.79	-369.639	-65.7995	-435.338	16.6747	-244.172	436.266	-169.6	-490.564
5.22	-235.504	-489.699	-485.377	119.861	166.149	410.72	-173.631	-160.262	143.416	-399.49	257.521	474.425	564.381	-284.214	317.133	-235.923	80.4805	-443.692	-261.402	-171.555	-411.153	-4.48056	368.123	-31.3183	411.252			-538.712	30.237	-71.5708	-453.666	450.702	459.56	-413.379	-516.62	-513.609	298.215	-422.884	-204.946	37.7986	432.578	-370.231	-65.3803	-435.162	16.7759	-245.576	436.554	-171.444	-490.542
5.23	-235.002	-490.632	-486.414	119.675	167.27	411.635	-174.485	-160.137	142.756	-401.073	257.556	475.593	564.27	-284.332	317.999	-238.191	77.5811	-443.465	-261.401	-171.934	-410.873	-4.81332	368.209	-32.5554	412.668			-538.802	30.6407	-70.959	-453.761	452.201	459.881	-413.868	-516.584	-515.158	299.388	-422.984	-205.448	38.1648	432.264	-370.65	-65.6608	-436.415	16.4189	-246.09	436.993	-171.288	-491.647
5.24	-236.406	-491.666	-487.333	120.217	166.808	412.946	-174.713	-162.544	142.337	-401.885	258.485	476.697	566.215	-286.447	318.25	-238.342	77.8283	-445.719	-261.486	-172.708	-412.008	-5.34084	368.556	-32.4221	413.149			-539.644	30.7612	-70.7749	-455.244	452.16	460.651	-414.302	-517.575	-516.329	299.965	-425.313	-205.662	38.9578	431.757	-371.183	-65.3017	-436.404	16.4423	-247.257	437.215	-173.332	-493
5.25	-235.584	-492.088	-488.901	120.196	167.975	413.61	-175.721	-162.51	141.941	-402.501	258.512	476.588	566.382	-286.311	318.848	-241.253	75.6523	-445.75	-261.695	-174.018	-411.398	-5.41656	368.504	-33.0673	414.869			-538.853	31.1362	-70.0112	-455.636	453.892	460.958	-415.607	-517.886	-516.937	300.525	-425.214	-205.472	39.3522	431.686	-372.363	-65.8986	-437.162	16.3133	-248.184	437.517	-173.772	-492.941
5.26	-237.456	-493.311	-489.307	120.425	168.172	415.01	-175.668	-163.964	141.372	-403.993	259.505	478.641	567.861	-288.914	318.782	-240.891	74.9408	-447.564	-261.461	-174.34	-412.1	-6.0372	368.938	-33.6412	414.903			-539.399	31.6038	-69.8899	-456.909	454.375	462.204	-415.299	-518.254	-518.657	301.904	-427.713	-206.352	40.1569	430.811	-372.191	-65.8086	-437.38	16.1622	-248.546	437.963	-173.856	-495.156
5.27	-236.952	-493.998	-490.902	120.672	168.4	415.299	-176.756	-164.538	140.971	-404.304	259.231	478.607	568.545	-288.648	319.633	-243.664	74.053	-448.159	-261.97	-176.378	-412.751	-6.01176	368.93	-33.8251	417.226			-539.153	31.9418	-69.3746	-457.67	454.965	462.159	-417.453	-518.404	-519.261	302.096	-427.221	-206.079	40.8598	430.924	-373.743	-66.447	-437.638	16.0428	-250.719	438.135	-175.892	-494.681
5.28	-238.245	-494.742	-491.424	120.601	169.408	416.978	-176.706	-166.243	140.523	-405.426	260.556	479.737	569.149	-291.157	319.242	-243.27	72.0498	-449.543	-261.57	-175.657	-412.876	-6.61368	369.041	-34.2948	417.253			-539.77	32.2224	-69.0769	-458.407	456.808	463.983	-417.003	-518.911	-520.321	303.183	-429.687	-206.51	41.1517	429.525	-374.022	-66.362	-438.292	15.8239	-250.485	438.437	-175.308	-497.087
5.29	-238.144	-495.764	-492.645	121.095	169.363	417.118	-177.597	-166.86	139.868	-406.38	260.295	480.795	570.44	-290.973	319.815	-245.864	72.1837	-450.374	-262.172	-178.189	-413.99	-6.62856	369.209	-34.3158	419.264			-539.162	32.6692	-68.6903	-460.068	456.322	463.819	-418.985	-519.333	-521.942	304.362	-430.009	-206.924	42.5044	429.813	-374.916	-66.9574	-438.347	15.8479	-252.523	438.827	-177.514	-496.701
5.3	-239.305	-496.194	-493.452	120.939	169.435	419.026	-177.71	-167.826	139.732	-406.681	261.135	480.792	570.897	-292.941	319.568	-245.48	69.8518	-451.4	-261.772	-178.356	-414.103	-7.0188	369.402	-35.206	419.262			-539.651	32.8897	-68.3237	-459.935	458.39	466.155	-418.908	-519.669	-522.185	304.627	-430.88	-206.692	42.5461	428.182	-375.731	-66.9068	-438.905	15.5489	-252.215	439.042	-177.534	-498.782
5.31	-239.227	-497.592	-494.887	121.552	169.961	419.046	-178.423	-169.138	139.07	-407.96	261.269	482.92	572.022	-292.983	319.976	-248.69	70.1236	-452.862	-262.323	-178.831	-414.859	-7.23252	369.503	-35.7964	421.143			-539.256	33.12	-68.0012	-462.587	458.544	466.045	-420.513	-520.356	-523.983	306.409	-431.883	-207.641	43.9486	428.47	-376.478	-67.5745	-438.68	15.535	-254.385	439.369	-178.772	-499.085
5.32	-239.613	-498.448	-495.478	121.347	169.367	420.64	-178.815	-169.366	138.671	-408.2	261.762	482.501	572.267	-294.728	319.677	-248.496	67.7023	-453.146	-262.224	-181.133	-415.786	-7.38684	369.987	-36.1145	421.282			-539.695	33.1404	-67.703	-461.851	458.581	468.335	-421.221	-520.269	-525.017	306.773	-432.177	-207.204	43.7189	426.726	-377.558	-67.655	-439.616	15.4217	-254.846	439.699	-180.043	-500.255
5.33	-239.905	-499.569	-497.316	122.201	169.708	420.877	-179.068	-171.691	138.436	-408.969	262.112	484.034	573.607	-294.731	319.748	-251.014	68.1116	-455.27	-262.237	-180.354	-415.864	-7.64304	369.729	-37.3518	423.129			-539.377	33.7472	-67.0946	-464.442	460.867	468.477	-421.678	-521.067	-525.614	308.058	-433.179	-207.866	45.4325	426.935	-378.171	-68.1308	-439.356	15.0137	-255.883	440.052	-179.884	-501.318
5.34	-240.19	-500.246	-497.647	122.066	169.691	422.251	-179.64	-171.521	137.746	-409.623	262.461	484.945	574.046	-296.236	319.649	-251.764	65.4772	-455.226	-262.751	-182.013	-417.403	-7.80804	370.379	-37.0603	423.504			-539.776	33.8027	-66.9306	-464.583	460.379	470.467	-423.52	-521.05	-527.877	309.238	-433.635	-208.347	45.403	425.284	-380.036	-68.2859	-440.512	15.1132	-257.608	440.773	-182.079	-501.996
5.35	-240.433	-501.532	-499.784	122.657	169.555	422.41	-179.802	-174.505	137.545	-409.965	263.039	484.915	575.11	-296.613	319.51	-253.523	65.8849	-458.037	-262.569	-182.111	-417	-7.93368	370.376	-38.1966	424.711			-539.866	34.6349	-66.2647	-465.685	461.399	470.771	-423.244	-521.92	-528.214	309.669	-435.178	-207.925	46.7434	425.27	-380.001	-68.553	-440.252	14.6339	-257.414	440.726	-181.8	-503.464
5.36	-240.702	-502.041	-499.769	123.518	169.735	423.54	-180.385	-174.385	137.087	-410.939	263.188	487.158	575.689	-297.88	319.367	-254.684	63.5177	-457.651	-262.865	-182.027	-418.862	-8.09688	370.7	-38.5321	425.598			-540.385	34.5612	-66.1349	-467.382	463.26	472.539	-425.54	-521.953	-529.954	311.358	-435.39	-208.908	46.9672	423.704	-381.692	-68.8754	-441.143	14.7917	-259.728	441.685	-183.744	-503.374
5.37	-240.414	-503.245	-501.883	123.379	169.747	423.844	-180.343	-176.046	136.897	-411.159	264.005	486.547	576.683	-298.304	319.357	-255.919	63.5605	-460.122	-262.884	-183.202	-419.177	-8.17764	370.63	-38.6866	426.523			-540.819	35.4362	-65.6654	-467.148	462.73	472.902	-424.992	-522.445	-530.847	311.627	-437.508	-208.6	47.8877	423.315	-382.553	-69.1697	-441.022	14.3474	-259.641	442.348	-184.089	-505.554
5.38	-240.897	-503.901	-501.576	124.463	170.013	424.858	-181.021	-176.912	136.698	-411.849	263.633	487.972	577.455	-299.209	319.345	-257.841	61.7365	-459.932	-262.909	-183.268	-419.726	-8.34132	371.037	-39.4946	427.302			-541.639	35.4694	-65.6232	-469.503	465.357	474.396	-427.353	-522.895	-531.771	312.807	-437.296	-208.876	48.645	422.276	-382.722	-69.3661	-441.778	14.5781	-261.409	442.528	-184.733	-505.1
5.39	-240.451	-505.391	-503.687	124.366	169.673	425.429	-181.169	-177.895	136.454	-412.573	264.523	490.058	578.039	-300.071	319.265	-258.236	61.2475	-462.057	-263.138	-184.656	-421.377	-8.12628	370.808	-39.5328	428.178			-540.876	36.4771	-65.1576	-468.934	465.91	475.27	-427.508	-523.281	-533.624	314.014	-438.972	-209.752	48.9947	421.06	-383.593	-69.5576	-441.866	13.9854	-262.022	443.958	-186.384	-507.814
5.4	-241.871	-505.687	-503.49	125.296	170.021	426.05	-181.456	-179.469	136.421	-413.044	264.34	489.183	579.113	-300.48	319.189	-260.608	60.2792	-462.002	-263.15	-184.938	-421.159	-8.37924	371.358	-39.5527	428.971			-542.149	36.4087	-65.0152	-471.316	466.371	476.073	-428.444	-523.929	-533.85	314.35	-439.575	-209.358	50.2436	420.606	-384.182	-70.1501	-442.161	14.3588	-262.657	443.89	-186.234	-507.599
5.41	-240.83	-507.177	-505.506	125.388	169.9	426.756	-182.177	-180.034	136.174	-413.862	264.935	491.313	579.526	-301.862	319.024	-260.868	58.9724	-464.138	-263.43	-185.988	-422.627	-8.15772	371.329	-40.2799	429.372			-540.869	37.4569	-65.2603	-470.913	467.93	477.277	-430.461	-524.204	-535.884	315.876	-440.102	-209.706	50.2062	418.879	-384.799	-70.0897	-442.726	13.537	-265.097	445.632	-187.947	-509.1
5.42	-242.052	-507.555	-505.075	126.146	170.216	427.151	-181.944	-181.978	136.109	-414.284	265.019	492.494	580.621	-301.773	319.203	-262.657	58.4908	-464.036	-263.417	-186.26	-422.675	-7.97136	371.87	-39.8608	431.53			-542.84	37.3607	-64.871	-472.906	468.084	477.833	-429.786	-524.932	-536.613	316.271	-441.284	-210.116	51.5476	418.967	-386.416	-70.7446	-442.772	13.8047	-264.351	445.171	-187.571	-511.345
5.43	-241.247	-509.044	-506.754	126.488	170.222	427.87	-182.911	-182.312	136.05	-414.924	265.152	491.914	581.121	-303.568	318.973	-263.026	57.0613	-466.117	-263.734	-187.539	-423.242	-8.12172	371.966	-40.7063	431.604			-541.654	38.4432	-66.0196	-473.264	469.97	479.042	-432.051	-525.143	-537.828	317.252	-441.263	-209.602	51.3394	416.58	-385.943	-70.843	-443.485	13.271	-266.886	447.05	-188.881	-510.888
5.44	-242.009	-509.216	-507.063	127.01	170.491	428.161	-182.946	-183.933	135.613	-415.261	265.874	494.268	582.103	-303.612	319.018	-264.683	56.6987	-467.01	-263.895	-188.022	-424.161	-7.4022	372.348	-40.228	433.873			-542.156	38.2256	-65.5387	-474.292	469.971	479.44	-432.282	-525.842	-539.424	317.929	-443.837	-209.368	52.5198	416.822	-387.657	-71.3124	-443.347	13.1794	-267.439	446.89	-189.198	-513.831
5.45	-242.633	-511.111	-508.427	127.675	170.397	428.901	-183.626	-184.131	135.693	-415.695	265.776	494.128	582.87	-305.003	319.45	-264.868	54.9406	-467.688	-264.047	-188.873	-424.204	-7.48764	372.441	-40.9508	434.137			-542.898	39.467	-66.5168	-475.697	471.528	480.752	-432.792	-526.191	-539.873	318.634	-443.427	-209.593	53.047	414.64	-387.798	-71.8915	-444.155	13.1327	-268.346	448.222	-190.004	-513.685
5.46	-242.208	-511.061	-508.705	127.576	170.473	428.97	-184.22	-186.114	135.396	-416.661	266.477	495.204	583.583	-304.91	319.237	-266.959	55.0045	-469.605	-264.188	-189.668	-425.534	-7.0986	372.832	-40.987	436.315			-542.697	39.1834	-66.2993	-475.56	472.675	480.93	-434.252	-526.946	-541.4	320.096	-446.085	-209.11	53.6872	415.118	-388.484	-72.4444	-443.906	12.8059	-269.6	448.789	-190.604	-515.332
5.47	-241.402	-513.141	-510.277	128.786	170.506	430.504	-184.254	-186.518	135.084	-417.12	266.376	496.87	584.709	-306.334	319.744	-266.892	52.4539	-469.787	-264.369	-190.282	-425.368	-6.78804	372.933	-41.1583	436.737			-544.736	40.4108	-66.6967	-478.09	472.848	481.906	-434.303	-527.139	-542.04	320.843	-445.812	-208.89	54.5929	412.843	-388.958	-72.7904	-444.664	13.0769	-269.909	449.46	-191.101	-516.359
5.48	-241.621	-513.275	-510.767	128.525	170.431	430.259	-185.542	-188.464	134.938	-417.691	267.121	496.454	585.003	-306.382	319.485	-269.245	52.9612	-471.596	-264.463	-191.194	-426.757	-6.68664	373.021	-41.8409	438.478			-544.122	40.3027	-66.5572	-477.435	475.374	481.575	-435.987	-527.805	-542.719	321.849	-448.211	-208.94	54.743	413.14	-389.476	-73.3654	-444.478	12.8334	-272.012	450.86	-192.032	-516.789
5.49	-240.155	-514.992	-512.073	129.665	170.229	432.092	-185.374	-188.868	134.203	-418.538	267.184	498.682	586.523	-308.135	320.253	-269.004	50.1515	-471.413	-264.704	-191.504	-426.476	-6.41064	373.008	-41.7445	439.074			-544.879	41.1448	-66.6678	-479.245	474.664	481.214	-435.972	-527.621	-543.95	323.252	-448.402	-208.899	55.8934	411.053	-390.015	-73.6163	-444.838	13.2112	-271.603	450.612	-192.319	-519.003
5.5	-239.88	-515.16	-512.86	130.007	170.61	432.179	-186.796	-190.176	133.985	-418.829	267.454	499.753	586.751	-308.184	320.059	-271.867	50.3304	-473.64	-264.752	-192.836	-427.988	-6.42024	373.063	-42.5465	440.665			-545.585	40.9825	-66.5915	-480.411	477.263	481.444	-437.665	-528.303	-544.466	323.761	-450.007	-208.531	56.0974	410.989	-390.784	-74.0773	-444.938	12.9736	-274.15	452.922	-193.667	-518.107
5.51	-239.386	-516.979	-514.26	129.754	170.278	434.764	-186.51	-191.37	133.315	-419.55	267.879	499.676	588.157	-309.699	320.909	-271.6	48.4418	-473.479	-264.879	-192.886	-427.918	-6.0216	372.755	-42.5975	441.461			-545.298	41.9092	-66.6499	-480.534	477.7	481.648	-437.344	-528.36	-545.282	324.989	-451.496	-208.547	56.9534	409.55	-390.389	-74.1821	-445.187	13.2854	-273.749	452.163	-193.849	-520.552
5.52	-238.256	-516.987	-514.898	130.832	170.521	434.622	-187.921	-191.571	132.739	-420.343	267.841	501.452	588.756	-310.321	321.554	-274.578	47.2494	-475.494	-264.903	-194.062	-428.925	-6.00228	372.769	-43.0972	443.12			-545.932	41.7139	-66.6427	-481.291	477.932	481.686	-438.764	-528.807	-545.979	326.389	-451.7	-208.973	57.4759	408.948	-390.866	-74.6208	-445.368	13.3354	-275.262	454.109	-195.036	-520.681
5.53	-238.271	-518.744	-516.441	131.209	170.611	436.971	-187.944	-193.57	132.321	-420.5	268.207	501.501	589.704	-311.311	321.718	-274.17	46.6726	-475.426	-265.071	-194.471	-429.934	-5.79444	372.212	-43.5823	444.396			-545.565	42.4886	-66.7663	-482.462	479.171	481.187	-439.125	-529.379	-546.637	326.736	-453.9	-208.565	58.16	407.889	-390.574	-74.4415	-445.502	13.5986	-276.706	454.302	-196.164	-521.448
5.54	-236.786	-518.835	-517.26	131.536	170.747	437.352	-188.74	-193.653	130.847	-421.614	268.096	501.84	591.001	-312.355	323.735	-277.291	44.5422	-477.457	-265.072	-195.206	-429.773	-5.51124	372.292	-44.021	445.268			-545.562	42.269	-66.7498	-482.641	479.671	481.219	-439.817	-529.305	-547.788	328.652	-453.464	-209.008	58.64	406.351	-391.125	-75.0736	-445.765	13.8284	-276.338	455.193	-196.208	-523.809
5.55	-236.724	-520.519	-518.603	132.749	170.911	439.147	-189.261	-196.598	130.945	-421.827	268.752	502.59	591.206	-312.72	323.654	-276.926	44.7941	-477.352	-265.036	-196.154	-431.283	-5.60988	371.679	-44.3107	446.781			-545.549	42.8005	-66.739	-484.576	480.741	481.499	-440.369	-530.182	-548.655	328.971	-455.743	-208.899	59.0864	405.778	-390.97	-75.0293	-445.807	13.9606	-279.297	456.594	-198.333	-523.014
5.56	-235.317	-520.752	-519.31	132.547	170.918	439.709	-189.902	-196.463	130.213	-422.509	268.329	502.971	593.104	-314.103	324.978	-280.029	42.6893	-479.09	-265.229	-196.335	-431.021	-5.11368	371.926	-45.1566	447.282			-545.012	42.6911	-66.8089	-483.806	482.026	481.444	-441.018	-529.997	-549.419	330.157	-455.498	-209.242	59.8026	403.839	-391.116	-75.3322	-446.277	14.6081	-279.205	456.232	-198.017	-525.323
5.57	-235.149	-522.611	-520.609	133.958	171.152	441.738	-191.03	-198.16	130.082	-423.52	269.019	503.897	592.969	-314.008	325.425	-279.859	43.0254	-479.343	-264.73	-197.861	-432.362	-5.1894	371.418	-44.9168	449.364			-545.074	43.2097	-66.7045	-486.375	482.08	482.313	-441.923	-530.615	-550.923	331.479	-457.479	-209.33	60.1642	404.054	-391.76	-75.3995	-446.066	14.4398	-279.644	458.475	-200.101	-526.011
5.58	-234.238	-522.761	-521.562	134.101	171.393	441.992	-191.066	-199.002	129.788	-423.64	268.949	504.06	594.705	-315.443	326.112	-282.673	40.6471	-481.03	-263.975	-197.753	-432.484	-4.926	371.44	-45.5934	449.525			-544.193	43.1508	-66.7966	-486.287	484.445	482.231	-442.131	-530.725	-551.415	331.92	-457.811	-209.646	60.9107	401.618	-391.785	-75.3131	-446.686	15.4242	-282.722	457.913	-200.124	-526.405
5.59	-233.605	-524.573	-522.825	134.732	171.4	444.548	-192.672	-200.393	128.94	-424.56	269.479	505.071	595.041	-315.102	326.577	-282.9	40.803	-481.232	-264.327	-199.134	-433.122	-4.50108	371.033	-45.7082	451.633			-544.04	43.6074	-66.8162	-487.573	483.741	483.042	-443.557	-531.214	-553.335	333.037	-459.282	-209.89	61.3874	401.9	-392.36	-75.6455	-446.625	15.2915	-282.326	459.354	-201.208	-528.117
5.6	-232.983	-524.808	-523.613	135.504	172.257	444.416	-192.157	-201.079	128.846	-425.137	269.53	505.938	596.056	-316.466	327.772	-284.605	39.2096	-483.049	-263.817	-199.473	-433.934	-4.79064	371.023	-46.4195	452.115			-543.486	43.5661	-66.9977	-489.067	486.258	482.984	-443.293	-531.348	-553.358	333.434	-460.053	-210.073	62	399.463	-392.62	-75.041	-447.018	16.4207	-283.961	460.04	-202.685	-527.991
5.61	-231.931	-526.604	-525.342	135.475	172.375	446.963	-194.106	-202.87	127.12	-425.718	269.81	505.566	597.172	-316.312	328.11	-285.416	38.1661	-483.061	-263.3	-200.613	-434.309	-4.02012	370.539	-46.359	454.065			-542.934	43.8605	-66.8509	-488.762	486.746	483.728	-445.136	-531.701	-555.276	334.223	-460.987	-210.239	62.6759	399.743	-393.019	-75.295	-447.374	16.1333	-285.257	460.534	-202.769	-529.138
5.62	-231.729	-527.006	-525.816	136.842	172.412	447.035	-193.805	-203.944	126.969	-426.798	270.257	507.667	597.788	-317.325	329.247	-286.462	37.9081	-484.799	-263.456	-201.463	-434.836	-4.14648	370.726	-47.0609	454.772			-542.883	43.9754	-67.0768	-491.737	487.562	483.659	-444.907	-532.375	-555.311	335.024	-462.235	-210.784	63.2737	397.621	-393.338	-75.0802	-447.33	17.1362	-285.217	461.499	-203.937	-529.967
5.63	-229.737	-528.557	-528.024	136.674	172.885	449.403	-195.354	-204.598	125.46	-427.336	270.237	507.187	599.4	-317.285	329.657	-287.233	35.8279	-485.021	-263.213	-202.034	-435.389	-3.603	370.474	-47.4109	456.14			-542.293	44.185	-67.122	-491.325	490.082	484.341	-446.425	-532.244	-556.581	335.316	-462.605	-210.876	64.1719	397.589	-394.059	-74.7228	-447.764	16.9937	-287.465	461.863	-204.182	-530.027
5.64	-230.019	-529.051	-528.096	137.667	173.132	449.552	-195.494	-206.401	124.91	-428.37	270.968	508.419	599.539	-317.998	330.615	-289.032	35.9786	-486.473	-262.948	-203.741	-435.558	-3.42972	370.609	-47.51	457.411			-542.325	44.3436	-67.3279	-493.109	489.946	484.299	-446.695	-532.905	-556.828	336.26	-464.202	-211.411	64.4507	395.786	-394.338	-74.6958	-447.844	17.7533	-287.188	462.991	-205.051	-531.726
5.65	-227.867	-530.236	-530.628	138.026	173.032	451.927	-196.358	-206.298	124.292	-429.543	270.883	510.043	601.379	-318.177	331.006	-289.193	33.8087	-487.132	-263.055	-203.601	-436.335	-3.14544	370.486	-48.4363	458.063			-542.117	44.4199	-67.2482	-494.377	490.765	484.963	-447.739	-532.642	-557.53	337.137	-464.5	-211.898	65.5676	395.004	-394.83	-74.3464	-448.13	17.9821	-288.423	463.225	-205.901	-531.246
5.66	-227.789	-531.041	-530.239	138.239	173.364	452.159	-196.992	-208.932	123.235	-429.975	271.898	509.116	601.317	-318.702	332.04	-291.816	34.1923	-488.399	-262.973	-206.06	-436.386	-2.82744	370.4	-48.154	459.986			-541.817	44.6209	-67.6123	-494.519	492.642	485.061	-448.344	-533.327	-558.057	337.463	-466.337	-211.963	65.7316	393.881	-396.126	-74.348	-448.258	18.5227	-289.911	464.509	-206.173	-533.525
5.67	-226.476	-532.174	-532.761	139.369	173.093	454.271	-197.177	-208.594	122.652	-431.484	271.626	510.828	603.269	-319.073	331.719	-291.749	31.8689	-489.175	-262.84	-205.541	-437.486	-2.67852	370.474	-48.9302	460.366			-542.019	44.7083	-67.4996	-496.277	492.371	485.667	-448.667	-533.281	-558.465	338.745	-466.43	-213.193	67.2308	392.518	-395.763	-74.202	-448.34	18.7301	-289.705	464.596	-208.397	-532.97
5.68	-225.656	-533.27	-532.536	139.13	173.223	454.77	-198.799	-211.701	121.307	-431.774	272.684	510.884	603.119	-319.354	333.204	-294.239	32.389	-490.046	-263.024	-207.378	-437.653	-2.2998	370.17	-49.1304	462.655			-541.817	44.8872	-67.7776	-496.207	495.004	485.815	-450.563	-533.993	-559.123	339.126	-468.226	-213.016	67.38	391.941	-396.865	-74.2201	-448.541	19.0097	-291.725	465.456	-207.91	-534.967
5.69	-225.252	-534.118	-535.119	140.677	173.145	456.245	-198.274	-211.349	120.843	-432.788	272.411	510.129	604.783	-320.482	332.902	-294.094	30.1223	-490.871	-262.722	-207.508	-438.69	-2.04924	370.19	-49.4572	462.729			-541.904	45.022	-67.8606	-498.02	494.484	486.363	-450.122	-534.256	-559.212	339.887	-468.329	-213.722	68.6941	389.907	-397.274	-74.0436	-448.506	19.23	-291.606	466.052	-210.4	-535.584
5.7	-224.028	-535.191	-534.791	140.284	173.145	457.503	-199.607	-213.561	119.209	-433.674	273.465	511.393	604.935	-320.36	334.027	-296.818	30.5664	-492.009	-262.973	-208.978	-438.458	-1.83912	369.958	-50.0671	465.359			-541.909	45.1211	-68.0534	-497.783	496.863	486.959	-451.757	-534.416	-559.797	340.851	-470.166	-215.183	69.037	389.965	-397.914	-73.9451	-448.649	19.6068	-293.092	466.74	-210.282	-536.094
5.71	-223.433	-535.808	-537.903	141.952	173.327	458.205	-200.228	-214.129	118.102	-434.022	273.293	510.864	605.951	-322.012	333.854	-296.543	28.5898	-492.593	-263.067	-209.573	-439.36	-1.65132	369.764	-50.0843	465.456			-542.03	45.2396	-68.3165	-499.85	497.826	487.079	-452.408	-535.022	-560.191	341.329	-470.062	-214.914	70.0044	387.585	-398.484	-73.8931	-448.998	19.7827	-293.791	467.31	-211.795	-538.049
5.72	-222.244	-537.396	-537.451	141.967	173.312	460.029	-200.404	-214.954	117.537	-434.93	274.545	511.753	606.582	-321.788	334.613	-299.239	28.1383	-493.753	-262.991	-210.185	-440.252	-1.44312	369.693	-50.7256	467.701			-542.069	45.3628	-68.4071	-499.79	498.14	488.168	-452.981	-534.688	-560.321	342.136	-472.306	-216.479	70.9332	388.109	-398.686	-73.8254	-448.887	20.0556	-294.123	467.76	-213.124	-537.817
5.73	-221.632	-537.667	-540.445	142.736	173.089	460.241	-201.455	-216.531	115.856	-435.253	274.355	511.979	607.3	-324.263	334.624	-299.223	27.9646	-494.598	-263.434	-212.26	-440.224	-1.16376	369.521	-50.8506	468.185			-542.134	45.471	-68.7818	-501.154	499.546	488.116	-454.261	-535.136	-561.01	342.603	-472.113	-216.544	71.5638	386.271	-399.452	-73.8052	-449.701	20.2134	-296.119	468.692	-213.08	-540.315
5.74	-220.216	-539.723	-540.317	143.675	173.173	462.342	-201.629	-217.009	115.066	-436.39	275.376	512.632	608.169	-323.84	335.37	-301.84	25.9043	-495.667	-263.174	-211.6	-441.636	-1.28688	369.467	-51.0524	469.764			-542.035	45.4925	-68.7138	-502.511	500.098	489.511	-454.299	-534.972	-561.286	343.801	-474.229	-217.44	73.0748	386.817	-399.62	-73.765	-450.289	20.441	-295.445	468.931	-215.302	-539.892
5.75	-219.728	-539.634	-542.499	143.459	172.876	462.389	-202.613	-218.974	114.193	-437.056	275.398	513.332	608.533	-326.058	335.166	-302.423	27.2908	-496.342	-263.93	-213.792	-441.294	-0.75372	369.195	-51.9833	470.927			-542.132	45.5754	-68.9776	-501.853	501.104	489.41	-455.944	-535.337	-561.539	344.471	-473.963	-218.342	73.201	386.018	-400.418	-73.8755	-450.459	20.7679	-297.434	469.806	-215.012	-542.184
5.76	-218.329	-541.939	-543.101	144.482	172.887	464.679	-202.657	-219.441	112.67	-437.731	276.278	513.48	609.477	-326.462	335.941	-304.344	25.1755	-497.445	-263.93	-213.374	-442.661	-0.843	369.136	-51.5533	471.835			-541.899	45.8704	-68.8969	-504.204	502.338	490.934	-455.748	-535.516	-562.422	345.192	-475.946	-218.505	75.2993	385.528	-400.872	-73.5498	-452.233	20.8324	-297.812	470.034	-216.921	-542.356
5.77	-217.889	-541.975	-544.646	145.143	172.726	464.828	-204.233	-221.723	112.163	-439.017	276.436	515.27	609.762	-327.391	335.569	-304.865	25.7756	-498.358	-264.489	-215.032	-442.405	-0.62988	368.922	-52.2374	474.018			-542.04	45.991	-69.0796	-504.375	502.628	490.924	-457.817	-535.793	-562.707	346.407	-476.417	-220.527	75.2748	385.311	-401.806	-73.7486	-451.93	21.1075	-297.165	470.814	-217.327	-543.23
5.78	-216.19	-544.02	-545.712	144.904	172.661	466.672	-203.983	-221.809	111.212	-439.454	277.091	514.781	610.866	-328.519	336.049	-306.939	25.3061	-499.212	-265.993	-215.661	-443.425	-0.18732	368.991	-52.3081	474.185			-541.896	46.373	-69.0046	-504.834	505.073	492.23	-457.448	-536.051	-563.275	346.98	-477.678	-220.287	77.4037	384.935	-402.716	-73.4113	-453.86	21.1199	-298.935	471.209	-218.109	-545.381
5.79	-216.204	-543.903	-546.535	145.671	172.689	467.359	-205.425	-223.463	109.98	-440.201	277.67	515.795	610.962	-329.273	336.184	-307.981	25.0175	-499.922	-266.141	-216.055	-443.537	-0.34056	368.755	-52.3921	476.538			-542.385	46.3666	-69.0308	-506.261	504.614	492.625	-459.167	-536.09	-564.285	347.762	-478.792	-221.094	77.0632	384.736	-403.383	-73.3654	-454.016	21.4254	-298.501	471.757	-219.132	-544.713
5.8	-213.808	-546.031	-548.677	145.314	172.483	468.716	-205.459	-223.871	109.438	-441.504	278.097	517.515	612.045	-330.599	336.199	-309.159	25.1326	-501.031	-267.383	-217.962	-444.027	-0.00984	368.942	-52.9316	476.646			-542.905	47.0422	-69.0389	-506.24	507.224	493.645	-459.193	-536.357	-564.608	349.026	-479.407	-222.807	79.1544	384.466	-404.484	-73.3846	-455.2	21.2552	-298.616	472.824	-219.13	-547.261
5.81	-214.098	-546.099	-548.735	146.274	172.62	469.918	-206.305	-226.133	108.411	-441.736	278.827	516.934	612.41	-331.493	336.634	-310.806	24.328	-501.647	-267.931	-217.515	-444.881	0.33588	368.827	-52.8972	478.794			-542.773	46.949	-68.8325	-507.885	507.167	494.253	-460.188	-536.549	-565.416	349.303	-480.819	-222.31	79.3212	384.006	-405.026	-73.3076	-456.68	21.6178	-299.569	472.957	-220.85	-547.136
5.82	-211.03	-548.412	-550.612	145.855	172.573	470.682	-207.138	-226.432	107.401	-443.259	279.078	518.402	613.053	-332.676	336.68	-311.603	24.4032	-502.886	-268.514	-219.585	-445.218	0.09972	369.006	-53.2942	479.429			-542.756	47.6611	-68.9196	-507.79	508.239	494.837	-461.114	-536.665	-566.301	350.661	-481.23	-223.74	80.5266	383.624	-406.307	-73.3216	-456.628	21.4186	-299.614	474.31	-220.889	-548.224
5.83	-211.212	-548.406	-551.037	146.798	172.454	472.479	-207.494	-228.61	106.893	-443.722	280.067	519.101	613.805	-333.409	337.172	-313.895	23.4556	-503.439	-268.846	-219.663	-446.026	0.72384	368.884	-53.6228	480.958			-542.944	47.6926	-68.6549	-509.607	509.459	495.977	-461.109	-536.919	-566.598	351.228	-482.981	-224.471	81.4877	383.22	-406.653	-73.1632	-458.969	21.6504	-300.023	474.32	-222.478	-548.95
5.84	-209.445	-550.207	-552.726	146.644	172.647	472.85	-208.732	-229.58	105.604	-444.376	279.865	519.264	614.25	-335.157	337.163	-314.163	23.6663	-504.613	-269.814	-220.826	-446.052	0.25164	368.967	-53.5054	482.244			-542.017	48.3176	-68.8505	-509.649	509.583	496.274	-462.691	-536.656	-567.776	351.923	-482.673	-224.4	81.8646	382.266	-407.988	-73.1669	-458.559	21.3917	-300.912	475.613	-222.394	-549.381
5.85	-208.47	-550.372	-553.028	147.305	172.194	475.047	-208.462	-230.33	105.146	-445.805	281.456	520.81	615.223	-335.53	337.743	-316.216	22.4309	-505.23	-269.76	-221.653	-446.885	0.92412	368.918	-54.4006	483.252			-542.17	48.236	-68.5973	-510.544	511.204	497.609	-462.114	-537.164	-568.428	353.017	-484.956	-226.132	83.5278	382.18	-408.386	-72.9956	-461.115	21.6648	-300.428	475.838	-223.79	-550.744
5.86	-208.008	-552.216	-554.486	148.478	172.262	475.081	-210.155	-232.057	104.466	-446.005	281.123	520.419	615.574	-337.472	337.775	-316.756	22.7278	-506.461	-270.854	-222.236	-447.665	0.42984	368.984	-54.552	484.716			-541.66	48.9938	-68.6404	-512.763	511.598	497.687	-463.844	-537.001	-568.973	353.266	-484.719	-225.634	83.5778	380.903	-409.469	-72.8785	-460.804	21.3476	-301.805	476.702	-224.853	-550.85
5.87	-206.335	-552.554	-555.162	147.948	172.092	477.291	-210.228	-231.958	103.379	-447.507	282.64	522	616.585	-337.345	338.506	-318.948	21.7504	-506.991	-271.102	-223.522	-447.727	1.14024	368.979	-54.5036	485.08			-541.374	48.8678	-68.424	-512.084	512.883	499.134	-463.707	-537.353	-570.035	354.286	-486.674	-227.255	85.3644	381.335	-409.963	-72.4108	-462.698	21.5207	-301.194	477.873	-225.466	-552.518
5.88	-206.151	-554.327	-556.531	149.468	171.94	477.325	-211.385	-234.23	103.008	-448.158	282.489	522.583	616.786	-339.779	338.566	-318.884	21.3859	-508.112	-272.104	-223.588	-448.675	1.02564	369.003	-55.0037	487.53			-541.044	49.521	-68.5709	-514.088	514.858	499.243	-464.685	-537.61	-570.528	354.813	-486.749	-227.913	85.3386	379.143	-410.874	-72.38	-463.124	21.3049	-302.604	477.752	-226.545	-552.579
5.89	-203.908	-554.556	-557.248	149.843	172.082	479.531	-211.992	-233.981	102.517	-448.978	283.19	522.056	618.004	-339.494	339.267	-321.832	20.9294	-508.778	-272.383	-225.223	-448.649	1.37568	368.958	-55.0393	487.736			-540.436	49.3802	-68.3948	-514.395	514.698	500.625	-465.293	-537.744	-571.113	355.315	-487.907	-227.808	87.1232	379.528	-411.559	-71.6298	-464.215	21.4877	-301.91	479.608	-226.9	-553.807
5.9	-203.821	-556.413	-558.415	150.181	171.645	479.657	-212.466	-236.92	101.529	-450.606	284.26	524.009	618.279	-341.543	339.489	-321.559	20.1762	-509.949	-273.041	-225.265	-449.352	1.94952	369.049	-55.1077	489.974			-540.313	49.9189	-68.423	-515.036	517.499	500.879	-465.34	-537.946	-571.907	356.852	-489.295	-229.065	87.1463	377.516	-412.204	-71.7905	-465.579	21.1109	-302.942	479.135	-227.518	-555.251
5.91	-201.355	-556.825	-559.199	151.266	171.639	481.494	-213.723	-236.668	101.345	-450.977	283.173	524.764	619.678	-341.426	340.127	-324.488	19.9193	-510.445	-274.09	-226.613	-449.394	1.80948	369.15	-55.4875	490.351			-539.458	49.7839	-68.1198	-516.884	516.948	502.058	-466.456	-537.744	-572.205	356.947	-488.932	-229.628	89.0202	377.887	-412.999	-70.719	-465.741	21.5938	-303.853	480.844	-228.688	-555.272
5.92	-201.536	-558.275	-560.034	151.043	171.306	481.86	-213.797	-238.696	100.078	-452.171	284.383	524.341	620.051	-343.301	340.543	-324.177	18.5969	-511.665	-274.05	-227.16	-449.886	2.8422	369.291	-55.2652	492.351			-539.436	50.2063	-68.2276	-516.454	519.636	502.362	-466.153	-537.97	-573.078	358.348	-491.258	-229.201	89.2819	376.23	-413.48	-70.8684	-467.801	21.1442	-303.055	481.134	-229.373	-557.178
5.93	-199.178	-558.852	-561.124	152.338	171.31	483.47	-215.524	-239.22	99.6497	-452.756	284.005	525.965	621.166	-343.557	341.091	-327.028	18.8136	-511.989	-275.449	-227.747	-450.634	2.33616	369.465	-55.9015	493.116			-538.652	50.1086	-67.7986	-518.57	519.992	503.597	-467.43	-537.626	-573.524	358.814	-491.532	-231.033	90.6833	376.262	-414.205	-69.2862	-467.756	21.6138	-305.153	481.744	-230.711	-556.772
5.94	-199.498	-560.694	-562.1	152.264	171.219	483.93	-215.221	-240.279	99.2104	-453.424	284.239	526.23	621.875	-345.252	341.746	-326.764	17.5194	-513.426	-275.593	-228.886	-450.427	3.58464	369.496	-55.9306	494.06			-538.715	50.6954	-67.8377	-518.313	520.972	503.863	-467.175	-538.032	-574.009	359.411	-492.423	-230.893	91.3529	374.858	-414.612	-69.6926	-468.872	21.0797	-305.372	483.45	-230.599	-558.859
5.95	-196.645	-561.052	-562.961	153.479	171.117	484.969	-217.301	-241.385	97.9813	-453.838	283.935	526.637	622.502	-345.618	342.254	-329.007	17.3942	-513.679	-275.968	-229.116	-452.117	3.23088	369.732	-56.0836	496.042			-537.734	50.4898	-67.0649	-519.943	523.09	504.767	-468.731	-538.007	-574.683	360.208	-493.043	-231.5	92.3023	374.486	-415.275	-68.2092	-469.164	21.7391	-304.965	482.882	-233.012	-558.676
5.96	-196.879	-562.605	-563.625	153.694	171.118	486.372	-217.214	-242.738	97.724	-454.36	284.091	527.578	623.855	-347.195	342.901	-329.414	16.6194	-514.7	-277.706	-230.161	-452.034	4.14552	369.801	-56.4206	496.156			-537.864	50.9748	-67.0138	-520.202	522.671	505.684	-468.546	-538.048	-574.709	360.618	-493.308	-232.86	93.4009	373.357	-415.635	-67.9361	-469.875	21.1376	-306.601	484.85	-232.554	-560.265
5.97	-194.253	-563.165	-564.881	154.316	171.084	486.673	-218.604	-244.348	96.7796	-455.063	284.522	527.629	623.961	-347.847	343.477	-331.023	16.1058	-515.65	-277.719	-230.543	-452.639	4.62096	369.984	-56.7287	498.881			-537.004	50.9089	-66.2561	-521.074	525.205	506.12	-469.589	-538.079	-575.076	361.796	-494.56	-232.468	93.828	372.833	-416.3	-66.8779	-470.013	21.7012	-306.533	484.453	-234.154	-561.148
5.98	-194.501	-564.484	-565.798	155.396	170.586	488.969	-219.568	-244.783	95.6148	-455.55	284.524	529.144	625.73	-348.997	344.479	-331.968	14.8439	-516.63	-278.214	-231.702	-453.621	4.6026	369.864	-56.5428	498.826			-537.002	51.1752	-66.1564	-522.473	525.202	507.25	-470.456	-538.079	-574.454	362.457	-494.609	-234.654	95.0596	372.065	-416.771	-66.2494	-471.532	21.258	-305.653	486.475	-235.24	-561.438
5.99	-192.018	-565.326	-566.897	155.348	171.165	488.985	-219.664	-247.377	95.1402	-456.032	285.678	529.004	625.737	-350.296	345.236	-332.709	14.857	-517.253	-280.389	-231.934	-453.574	5.8098	370.215	-57.1564	501.32			-536.442	51.1772	-65.524	-521.958	526.197	507.453	-470.719	-538.043	-574.395	363.19	-496.31	-234.21	95.4611	371.081	-417.036	-65.8596	-471.218	21.8753	-307.356	486.11	-235.795	-563.558
6	-191.969	-566.148	-567.624	156.915	170.671	491.459	-221.329	-247.544	93.4042	-457.087	285.396	529.837	627.325	-350.753	345.597	-334.617	13.3484	-518.373	-280.063	-233.071	-454.22	5.46612	370.032	-56.7408	501.444			-536.251	51.3154	-65.6077	-524.239	527.577	508.253	-472.216	-537.843	-574.01	364.721	-496.168	-235.339	96.5438	370.72	-417.344	-64.8104	-472.916	21.6908	-306.995	487.789	-236.819	-563.145
6.01	-189.587	-567.329	-568.989	156.747	171.164	491.619	-220.94	-249.01	92.6027	-457.341	287.096	531.148	627.54	-352.81	346.934	-334.526	13.3411	-518.948	-281.015	-233.467	-454.321	6.79464	370.307	-57.5117	503.754			-536.137	51.2882	-64.8072	-523.866	527.553	508.421	-471.716	-538.137	-573.906	365.091	-498.257	-237.292	96.925	368.982	-418.189	-64.78	-472.879	22.2806	-306.584	487.772	-237.136	-565.661
6.02	-189.213	-568.011	-569.278	158.103	170.827	493.785	-222.413	-249.699	91.4142	-458.297	286.767	530.916	628.913	-352.821	347.921	-337.067	12.1994	-519.885	-283.476	-234.368	-454.653	6.51636	369.969	-57.2233	504.148			-535.962	51.4794	-65.0315	-525.623	530.088	509.247	-473.928	-537.919	-573.607	366.416	-497.978	-236.725	97.9447	368.973	-418.294	-63.5231	-473.821	22.2132	-308.088	488.868	-238.051	-565.089
6.03	-187.07	-569.325	-571.168	158.166	171.018	494.428	-222.632	-251.687	89.6663	-459.058	288.494	531.895	629.54	-354.646	347.881	-336.891	11.2139	-520.61	-282.915	-234.913	-455.197	7.59084	370.116	-57.9307	506.063			-535.744	51.3371	-64.2809	-525.673	529.622	509.499	-474.102	-538.259	-573.616	367.275	-499.823	-238.414	98.514	367.137	-418.392	-63.5158	-475.025	22.6968	-308.14	489.649	-239.258	-567.634
6.04	-186.363	-569.88	-571.66	159	170.699	495.872	-223.109	-252.247	89.1612	-459.299	288.251	532.82	630.267	-354.522	349.164	-339.325	11.2396	-521.857	-284.746	-235.482	-455.134	7.62768	369.59	-57.9275	507.04			-535.665	51.5414	-64.4188	-526.699	531.956	510.123	-475.046	-538.138	-573.595	367.896	-499.816	-239.976	99.2465	367.212	-418.912	-62.2108	-475.167	22.9417	-308.177	489.886	-239.445	-567.599
6.05	-184.412	-571.551	-573.133	159.906	170.497	497.071	-223.976	-254.102	87.4828	-460.338	289.945	532.559	631.835	-356.595	350.271	-338.919	9.96768	-522.331	-285.852	-236.869	-456.243	8.14272	369.876	-58.0722	508.141			-535.425	51.3982	-63.78	-527.716	532.607	510.678	-476.433	-538.186	-573.516	368.859	-501.299	-239.444	100.182	365.229	-419.287	-62.5008	-476.076	23.2598	-308.613	491.764	-241.536	-568.625
6.06	-184.027	-571.632	-573.677	159.612	170.275	497.989	-223.879	-254.837	86.1929	-460.699	289.88	533.832	631.948	-356.286	350.612	-341.556	9.81732	-524.022	-285.844	-236.781	-455.995	8.9046	369.17	-59.152	509.631			-535.445	51.6624	-63.8999	-527.475	533.176	511.044	-476.536	-538.727	-573.521	369.242	-501.56	-241.797	100.587	365.277	-419.067	-60.8374	-476.049	23.6924	-308.414	491.184	-241.335	-570.282
6.07	-182.211	-573.528	-575.297	161.425	170.197	499.473	-225.024	-255.321	85.6364	-461.318	291.332	533.997	634.099	-358.537	351.803	-341.088	8.27508	-524.415	-288.478	-238.56	-457.232	8.80404	369.379	-58.9422	510.329			-535.205	51.516	-63.2023	-529.159	535.161	511.482	-478.026	-538.404	-573.381	370.254	-502.717	-242.159	101.738	363.481	-419.586	-61.2466	-477.328	23.8849	-309.105	493.281	-243.627	-569.981
6.08	-181.597	-573.541	-575.553	161.419	170.002	500.309	-224.679	-257.486	83.8304	-461.986	291.846	534.044	633.949	-358.164	352.631	-343.324	8.17464	-525.959	-288.101	-238.84	-457.069	10.1527	368.63	-60.0643	511.379			-535.057	51.7288	-63.5224	-529.425	535.124	511.781	-478.036	-538.91	-573.526	370.755	-503.225	-242.566	101.961	363.582	-419.589	-59.8832	-477.497	24.4231	-309.258	493.647	-243.174	-572.402
6.09	-180.16	-575.669	-577.407	161.703	170.063	501.967	-226.127	-257.517	82.9211	-462.586	292.466	535.14	636.25	-360.538	353.395	-343.52	6.912	-526.448	-289.916	-239.699	-458.057	9.74172	368.705	-60.3083	511.894			-534.941	51.6641	-62.8733	-529.82	536.575	512.22	-479.947	-538.65	-573.561	371.496	-503.787	-244.753	103.151	361.798	-419.97	-59.9641	-478.429	24.5225	-309.356	494.146	-245.369	-572.079
6.1	-178.72	-575.632	-577.537	163.309	169.785	502.568	-225.746	-260.011	82.0211	-463.459	293.914	534.986	636.269	-360.163	355.087	-345.183	5.60028	-528.121	-291.078	-240.694	-458.171	10.9174	367.975	-60.6588	514.103			-534.668	51.8176	-63.18	-531.019	537.217	512.4	-479.577	-539.127	-573.486	373.032	-505.133	-244.33	103.336	361.911	-420.58	-59.1206	-479.528	25.2408	-309.632	495.456	-245.653	-573.604
6.11	-178.315	-577.648	-579.404	162.578	169.858	504.579	-227.211	-259.613	80.4517	-463.718	294.133	535.329	638.021	-362.177	355.056	-346.072	5.50944	-528.395	-290.95	-241.054	-458.531	11.2099	367.954	-61.0795	514.409			-534.59	51.7133	-62.5801	-530.781	537.755	513.095	-481.627	-539.045	-573.641	373.288	-504.941	-245.62	104.368	360.634	-420.145	-59.1451	-479.788	25.2197	-309.583	495.572	-246.551	-574.612
6.12	-176.366	-577.663	-579.927	163.785	169.547	504.784	-227.241	-262.129	79.9105	-464.546	295.204	536.128	638.199	-362.771	356.78	-346.471	3.8484	-530.084	-293.608	-242.693	-459.427	11.5522	366.586	-61.5091	516.775			-534.304	51.9797	-62.5927	-531.913	539.128	513.081	-481.669	-539.398	-573.738	374.688	-506.679	-247.631	104.721	360.001	-420.867	-59.556	-480.792	25.9591	-309.91	496.671	-248.838	-574.784
6.13	-175.839	-579.565	-581.293	164.547	169.595	507.143	-227.653	-262.48	78.7375	-464.966	295.683	535.974	639.775	-363.792	357.127	-348.438	3.8118	-530.36	-293.4	-242.445	-459.265	12.1768	366.968	-62.0178	517.101			-534.236	51.9235	-62.3456	-532.609	539.54	513.925	-482.218	-539.994	-573.979	375.614	-506.541	-246.806	105.61	359.406	-421.247	-59.2556	-481.02	25.8554	-309.765	496.901	-248.111	-576.06
6.14	-173.908	-579.742	-582.581	164.07	169.604	507.165	-228.961	-263.467	77.5745	-465.234	296.267	536.454	640.411	-365.111	357.673	-348.35	2.5164	-532.201	-294.5	-244.612	-460.106	12.531	365.103	-62.7283	518.722			-533.826	52.0837	-61.9874	-533.258	541.21	513.909	-484.119	-539.797	-574.341	376.122	-507.639	-248.851	106.192	358.501	-421.307	-59.3075	-481.746	26.893	-310.152	498.238	-251.018	-576.195
6.15	-173.745	-581.923	-583.368	164.83	169.585	509.34	-228.399	-264.683	77.279	-466.116	296.779	536.876	641.416	-365.728	358.395	-350.299	2.43288	-532.324	-296.473	-244.222	-460.184	13.0615	365.113	-62.8238	519.67			-533.816	52.0292	-62.2117	-533.719	541.282	514.918	-483.787	-540.081	-574.458	377.752	-508.062	-250.023	106.8	358.112	-421.9	-59.0975	-482.134	26.6044	-310.864	498.168	-251.321	-577.125
6.16	-171.349	-582.044	-585.198	165.036	169.747	509.79	-229.261	-265.502	75.3427	-466.262	297.527	536.681	642.346	-367.267	359.103	-350.369	1.02912	-534.125	-296.222	-245.645	-460.776	13.5143	363.617	-63.9235	520.768			-533.384	52.2391	-61.7335	-534.604	543.501	515.116	-485.123	-540.126	-575.355	378.312	-508.959	-249.663	107.743	357.35	-422.171	-59.2666	-482.948	27.6553	-310.408	499.189	-252.29	-577.475
6.17	-171.29	-584.138	-585.758	165.605	169.66	511.073	-229.593	-266.965	74.8554	-466.871	297.882	537.435	642.926	-367.638	359.839	-352.706	1.1166	-534.323	-297.988	-247.212	-460.794	13.9895	363.469	-63.7217	522.103			-533.33	52.1978	-61.9901	-534.709	543.08	515.78	-485.601	-540.467	-575.621	379.372	-509.542	-252.129	108	357.263	-422.765	-57.8682	-483.024	27.3917	-311.534	500.428	-253.554	-577.908
6.18	-169.014	-584.208	-587.755	166.246	169.992	512.273	-230.091	-267.843	73.6843	-467.376	298.505	537.352	644.334	-369.96	360.879	-352.547	-0.65712	-535.847	-298.531	-246.891	-461.306	14.7304	362.186	-64.8319	522.701			-532.909	52.3178	-61.7308	-535.717	545.977	516.621	-486.713	-540.572	-576.19	380.592	-510.103	-251.945	109.452	356.569	-423.482	-58.027	-484.292	28.3024	-311.553	500.371	-253.613	-579.291
6.19	-169.153	-586.432	-588.07	166.467	170.061	512.931	-230.339	-269.618	72.2498	-467.537	299.993	537.492	644.732	-369.614	361.054	-355.22	-0.59148	-536.368	-298.939	-249.245	-461.302	14.6669	362.216	-65.0303	524.449			-532.848	52.2336	-62.1035	-535.525	545.512	516.761	-487.043	-541.247	-576.93	381.333	-511.58	-252.708	109.499	356.555	-423.349	-56.3878	-484.105	28.1129	-311.79	502.08	-254.793	-578.887
6.2	-166.449	-586.533	-590.368	167.874	170.055	514.019	-230.75	-270.01	71.7976	-467.942	300.107	538.118	646.376	-372.522	362.191	-354.882	-2.319	-537.367	-300.909	-248.656	-462.009	15.9707	360.615	-65.355	524.561			-532.222	52.3572	-62.1673	-536.852	547.636	518.597	-488.424	-541.445	-577.083	382.313	-511.377	-254.585	111.241	355.82	-424.392	-56.5759	-485.529	28.9462	-312.887	501.987	-255.342	-581.342
6.21	-167.002	-588.592	-590.37	167.527	170.375	514.307	-231.396	-272.226	70.3444	-468.079	301.066	537.715	646.721	-372.228	361.745	-357.499	-2.50548	-538.069	-300.475	-250.557	-462.154	15.5723	360.627	-66.5026	526.518			-532.09	52.3598	-62.3574	-536.718	548.508	518.689	-489.167	-542.238	-578.058	383.1	-512.469	-254.165	111.315	355.763	-424.655	-54.9907	-485.417	28.7236	-312.604	503.176	-256.468	-581.051
6.22	-164.716	-588.66	-592.709	169.26	170.148	514.836	-231.572	-272.328	69.4039	-468.421	301.61	538.296	648.141	-375.048	362.765	-357.335	-3.94332	-539.131	-302.342	-250.974	-462.647	16.652	358.978	-66.0374	526.594			-530.674	52.5577	-62.3198	-537.805	549.278	520.92	-489.624	-542.513	-578.956	384.256	-512.734	-256.059	113.063	354.923	-425.296	-55.1852	-486.712	29.5235	-313.427	503.739	-256.819	-582.521
6.23	-165.011	-591.154	-592.779	168.672	170.289	514.944	-232.595	-274.164	68.8486	-468.997	302.244	538.297	648.411	-374.911	362.546	-359.779	-4.8582	-539.52	-303.143	-251.674	-462.797	17.2204	359.064	-67.3892	528.634			-530.732	52.2686	-62.3638	-537.817	550.448	521.024	-491.512	-542.976	-579.316	385.493	-513.513	-256.57	112.894	354.968	-426.118	-53.7119	-487.141	29.1892	-313.822	504.278	-258.11	-583.68
6.24	-163.449	-591.183	-595.329	170.672	170.151	515.104	-232.365	-274.29	67.312	-469.203	303.194	538.522	649.78	-377.386	363.381	-359.7	-5.4906	-540.99	-303.283	-253.466	-463.066	17.0778	357.513	-67.088	528.692			-529.45	52.3968	-62.289	-538.903	550.564	523.041	-491.164	-543.295	-580.748	386.062	-513.892	-256.12	114.711	354.142	-426.576	-53.9861	-488.136	30.2119	-313.883	505.219	-259.776	-583.75
6.25	-162.776	-593.452	-594.992	170.022	169.98	515.139	-233.288	-276.641	66.9241	-470.117	303.826	539.669	650.142	-377.418	362.379	-361.6	-6.41376	-541.485	-305.273	-253.1	-463.186	17.9518	357.377	-67.7936	531.099			-529.112	52.2944	-62.2223	-539.139	552.165	523.413	-493.481	-544.086	-581.066	387.706	-514.808	-258.405	114.557	354.274	-427.48	-52.3072	-488.352	29.9113	-314.409	505.455	-259.76	-584.767
6.26	-161.996	-593.646	-597.558	171.118	169.732	515.558	-233.399	-276.615	65.9285	-470.322	304.699	539.3	651.486	-379.835	363.094	-361.757	-6.37296	-542.737	-304.812	-255.277	-463.124	18.2075	356.202	-68.2103	531.435			-528.731	52.272	-62.2698	-539.618	552.225	524.798	-493.215	-544.211	-582.076	388.116	-515.428	-258.129	116.341	353.511	-428.175	-52.6057	-488.96	30.6055	-314.51	506.408	-262.383	-585.414
6.27	-161.087	-595.494	-597.21	172.86	169.392	515.873	-234.32	-279.165	64.8218	-470.999	305.34	540.099	651.93	-379.595	362.334	-363.625	-7.77024	-543.04	-307.227	-254.677	-463.488	18.8149	355.937	-68.4236	533.223			-528.04	52.3088	-62.0082	-541.024	553.933	525.669	-495.356	-544.904	-583.273	389.317	-516.276	-258.5	116.616	353.605	-428.836	-50.9118	-489.991	30.2855	-314.872	506.502	-261.674	-585.924
6.28	-160.159	-595.64	-600.072	171.821	169.31	516.452	-234.397	-279.406	64.5233	-471.514	306.282	541.446	652.818	-381.983	362.674	-363.778	-7.53864	-544.691	-306.955	-256.666	-463.151	19.792	354.91	-69.1777	533.979			-527.662	52.2391	-61.9885	-540.396	553.977	526.639	-495.567	-544.851	-583.598	390.84	-517.652	-260.331	117.837	352.793	-429.733	-50.8775	-490.331	30.8092	-314.949	507.408	-264.657	-587.728
6.29	-159.371	-597.632	-599.648	173.668	168.626	516.656	-235.001	-281.265	63.3853	-471.653	306.384	540.766	653.436	-382.437	362.304	-365.426	-9.52572	-544.983	-308.449	-257.122	-463.172	19.5749	354.479	-69.416	535.198			-526.979	52.4695	-61.8359	-541.804	555.007	527.522	-496.92	-545.593	-585.114	391.234	-517.657	-259.649	118.585	352.934	-430.378	-49.4611	-491.686	30.6808	-315.184	507.949	-264.761	-586.919
6.3	-158.04	-597.713	-602.633	174.992	168.152	517.841	-235.464	-282.158	62.8126	-472.154	308.038	542.267	654.051	-384.117	362.353	-365.611	-9.16884	-546.966	-309.676	-257.847	-463.145	21.0638	353.561	-69.7318	536.446			-526.353	52.3135	-61.6812	-542.94	556.658	529.476	-497.91	-545.431	-585.818	393.085	-519.867	-260.937	119.416	352.267	-430.962	-48.9614	-491.52	30.9209	-315.248	508.484	-265.942	-589.294
6.31	-157.099	-599.666	-602.26	174.25	168.102	517.735	-235.817	-282.98	62.2744	-472.284	307.507	542.983	655.061	-384.894	362.781	-366.998	-11.2478	-547.159	-309.319	-259.139	-462.945	21.0337	353.082	-70.941	537.208			-525.715	52.7849	-61.6411	-542.465	556.676	529.892	-498.411	-546.267	-586.497	393.419	-519.912	-261.953	120.852	352.125	-432.432	-47.9674	-493.232	30.934	-315.517	508.855	-267.938	-589.447
6.32	-155.989	-599.98	-604.85	176.138	167.285	519.079	-236.559	-284.206	60.9841	-472.504	308.674	543.137	655.549	-386.245	362.669	-367.595	-11.0058	-549.249	-311.918	-259.269	-462.699	21.6968	352.455	-70.6267	539.066			-525.175	52.6445	-60.94	-544.195	559.219	532.215	-500.081	-546.185	-587.625	394.94	-520.526	-261.904	121.172	351.564	-432.897	-46.9022	-492.936	30.9923	-315.517	509.228	-267.988	-590.367
6.33	-154.477	-602.12	-605.318	176.579	167.417	518.948	-236.561	-284.615	60.417	-472.615	309.315	544.339	656.849	-387.041	362.784	-368.424	-13.0202	-549.29	-311.58	-261.167	-463.041	22.7124	351.764	-71.5566	539.191			-524.431	53.1653	-60.9582	-544.612	558.703	532.355	-499.861	-546.787	-588.275	396.099	-521.647	-263.124	123.036	351.449	-433.942	-46.7214	-494.706	31.1212	-315.565	510.406	-269.593	-591.929
6.34	-154.088	-601.911	-606.393	176.249	166.617	520.468	-237.577	-286.29	59.611	-472.674	309.682	544.476	656.971	-388.26	363.247	-369.621	-12.7944	-551.45	-312.497	-261.135	-462.653	22.4131	351.387	-72.2168	541.396			-524.169	53.0128	-60.4237	-544.666	561.225	534.505	-502.263	-547.136	-588.979	396.513	-521.553	-263.073	123.074	350.894	-435.141	-45.4046	-494.457	31.1172	-316.372	510.297	-269.909	-591.813
6.35	-152.277	-604.369	-607.901	178.108	166.351	520.474	-237.354	-287.06	58.2362	-473.112	311.069	545.264	658.34	-389.603	363.174	-369.988	-14.3896	-551.371	-314.884	-262.751	-463.187	23.5709	350.683	-72.1057	541.421			-523.204	53.494	-59.9323	-546.944	561.571	534.593	-501.711	-547.375	-589.982	398.493	-523.144	-263.796	125.291	350.305	-435.506	-45.6631	-495.906	31.2751	-316.468	511.844	-270.532	-593.022
6.36	-152.223	-604.105	-608.156	178.112	166.291	522.038	-238.448	-289.029	57.8557	-473.155	311.067	546.372	658.297	-390.193	363.416	-371.483	-14.937	-553.665	-313.994	-263.167	-462.793	23.7481	350.466	-72.7026	543.735			-523.117	53.3252	-59.8877	-546.833	562.541	536.459	-503.832	-547.828	-590.41	398.893	-522.896	-264.565	125.172	349.854	-436.614	-44.6341	-496.401	31.2016	-316.401	511.704	-271.679	-593.565
6.37	-150.028	-606.551	-610.093	177.699	165.811	522.089	-238.634	-289.306	56.4972	-473.572	312.794	546.228	659.815	-391.72	363.401	-372.122	-15.7176	-553.432	-316.228	-264.451	-463.252	24.0133	349.808	-73.0664	543.904			-521.927	53.8963	-58.64	-547.008	564.074	536.744	-503.875	-547.831	-591.445	400.173	-524.848	-264.268	127.154	348.881	-437.327	-44.6875	-497.29	31.4522	-317.26	513.375	-272.069	-593.768
6.38	-150.209	-606.305	-609.881	178.733	165.721	523.266	-239.317	-291.561	55.359	-474.016	312.537	548.418	659.686	-391.938	363.697	-373.434	-16.718	-555.54	-317.496	-264.785	-463.062	24.6727	349.535	-72.7961	545.319			-521.845	53.7194	-58.7591	-549.485	564.236	538.181	-505.034	-548.302	-592.146	401.7	-524.436	-265.792	127.107	348.789	-438.313	-43.652	-498.214	31.1771	-317.551	513.204	-274.089	-594.877
6.39	-148.052	-608.707	-611.868	179.382	165.443	523.665	-239.795	-291.781	54.8885	-474.135	314.526	548.504	661.129	-393.921	363.76	-374.071	-17.1647	-555.403	-317.628	-265.746	-463.038	24.2862	348.981	-73.5833	545.591			-520.631	54.1961	-57.5023	-550.188	565.427	539.004	-505.841	-548.101	-592.516	402.189	-526.57	-265.884	128.794	347.315	-438.943	-43.569	-498.749	31.5289	-317.651	514.343	-273.724	-594.759
6.4	-148.252	-608.546	-611.258	179.665	165.505	524.56	-240.288	-293.349	53.2342	-474.766	314.314	548.98	661.16	-393.777	363.825	-376.223	-18.6034	-557.454	-320.515	-266.946	-462.937	25.938	348.808	-73.1899	546.85			-520.593	53.9938	-57.6079	-550.029	566.015	540.139	-506.368	-548.556	-593.507	404.126	-526.006	-266.108	128.839	347.502	-439.579	-42.6611	-500.293	31.17	-318.004	515.4	-276.856	-596.659
6.41	-145.831	-610.699	-613.71	179.762	165.353	525.532	-240.754	-293.917	52.4242	-474.887	315.622	551.191	662.81	-395.793	364.023	-376.442	-18.6647	-557.398	-319.998	-266.865	-463.119	26.2385	348.235	-74.2207	547.343			-519.211	54.4926	-56.5465	-551.856	566.768	541.489	-507.396	-548.573	-593.925	404.835	-527.358	-267.406	130.469	346.106	-441.074	-42.4284	-500.13	31.5578	-317.913	515.111	-277.193	-597.185
6.42	-146.129	-610.462	-613.21	180.283	165.124	526.072	-241.204	-295.444	51.7508	-475.182	316.035	550.506	662.875	-395.663	364.382	-378.614	-20.5315	-558.952	-322.331	-268.688	-462.511	26.6537	348.103	-74.0459	548.961			-519.334	54.3074	-56.3497	-552.46	567.897	542.001	-507.894	-549.039	-594.329	405.681	-528.1	-267.087	130.83	346.434	-440.708	-41.3756	-502.041	31.1395	-318.22	517.381	-278.646	-597.618
6.43	-143.791	-612.804	-615.671	179.915	165.197	527.514	-241.815	-295.675	49.7597	-475.75	316.822	552.213	664.228	-397.221	364.341	-378.723	-20.1766	-558.951	-323.026	-268.617	-462.396	28.3231	347.331	-74.3744	549.951			-517.553	55.374	-55.898	-552.513	568.113	543.793	-509.343	-548.977	-595.228	407.53	-528.596	-267.921	132.081	344.995	-442.109	-41.3371	-501.776	31.6594	-318.276	516.822	-280.164	-599.187
6.44	-144.105	-612.994	-615.527	180.412	164.523	527.77	-241.812	-298.15	49.662	-475.91	318.133	553.114	664.501	-397.313	364.995	-381.205	-22.1261	-560.763	-323.6	-269.529	-462.057	27.7386	347.497	-74.9842	550.992			-517.777	54.398	-55.5893	-554.014	570.39	544.087	-509.085	-549.658	-595.375	407.893	-529.852	-268.566	132.464	344.988	-442.133	-39.801	-503.802	31.1306	-318.336	518.015	-280.417	-598.622
6.45	-141.912	-613.77	-617.774	180.139	164.508	528.858	-243.017	-298.443	48.0128	-476.575	318.228	553.181	665.756	-399.35	364.824	-380.937	-21.8249	-560.771	-326.043	-270.854	-461.78	29.6059	346.543	-75.1823	552.436			-515.898	54.5111	-55.7332	-553.808	569.861	546.238	-511.557	-549.681	-596.386	409.612	-529.797	-268.298	133.676	343.589	-443.341	-39.8206	-503.667	31.6074	-318.738	519.545	-281.779	-600.54
6.46	-141.867	-614.444	-618.143	180.428	164.312	528.882	-242.92	-300.967	47.0897	-476.755	320.246	555.198	666.289	-399.169	365.388	-383.231	-23.5508	-562.598	-325.39	-270.415	-461.35	29.5568	346.659	-75.1343	553.083			-516.007	54.7195	-55.3368	-555.626	572.154	546.189	-511.35	-550.332	-596.861	410.591	-531.49	-269.43	134.288	343.716	-443.753	-38.4967	-504.952	31.2349	-318.474	518.757	-282.27	-600.633
6.47	-139.811	-615.318	-619.379	180.346	163.748	530.358	-243.862	-301.18	46.5023	-477.063	319.924	554.618	667.223	-401.648	365.292	-383.179	-23.5127	-562.832	-327.876	-272.027	-461.117	30.6197	345.498	-75.8605	554.5			-514.23	54.2987	-55.5258	-555.234	572.203	548.602	-512.796	-550.532	-597.295	411.34	-531.288	-269.125	135.211	341.999	-444.594	-38.4347	-505.492	31.6368	-319.196	520.942	-283.298	-601.613
6.48	-139.684	-615.649	-621.353	180.232	164.049	530.306	-244.168	-303.419	44.885	-477.568	322.018	556.544	668.127	-401.387	365.956	-385.319	-24.2236	-564.418	-328.112	-272.432	-460.683	31.8648	345.615	-75.3548	554.906			-514.16	54.488	-55.4762	-557.095	572.941	548.716	-513.58	-550.878	-598.23	413.138	-533.167	-269.969	136.004	342.267	-444.946	-37.2486	-505.659	31.3073	-319.042	521.236	-284.703	-602.793
6.49	-137.97	-616.646	-621.31	180.385	163.512	532.364	-244.489	-303.983	44.295	-477.682	322.21	557.418	668.67	-403.397	366.013	-385.466	-25.4284	-564.548	-329.271	-272.82	-460.433	31.392	344.28	-76.1176	555.736			-512.863	54.2249	-55.41	-556.715	574.409	550.692	-514.107	-551.363	-598.717	413.691	-533.218	-270.458	136.636	340.526	-445.728	-37.0352	-506.909	31.7587	-319.324	521.425	-285.111	-602.567
6.5	-137.453	-617.104	-624.45	180.297	163.806	532.377	-245.513	-305.1	43.5401	-478.034	323.426	557.464	669.955	-403.55	366.723	-387.691	-25.7254	-566.451	-330.573	-274.167	-460.109	33.634	344.449	-75.9774	556.041			-512.585	54.5093	-55.7474	-558.651	574.293	550.683	-515.769	-551.218	-599.073	414.832	-534.43	-270.331	137.682	340.317	-446.32	-36.0594	-506.785	31.5526	-319.657	523.246	-287.098	-604.135
6.51	-136.141	-618.585	-624.18	180.314	163.915	534.391	-245.33	-306.418	42.0593	-478.217	324	559.837	670.006	-404.919	366.62	-388.073	-27.3059	-566.638	-330.637	-274.171	-460.182	33.1208	342.999	-76.3519	557.465			-511.575	54.2684	-55.3848	-559.089	576.846	552.161	-515.709	-552.098	-600.171	416.177	-535.066	-271.395	138.083	339.102	-446.683	-35.8453	-508.374	31.9846	-319.475	522.576	-286.995	-603.994
6.52	-135.407	-618.803	-626.54	180.391	163.911	534.533	-246.759	-306.97	41.6026	-478.42	324.749	559.287	671.708	-405.392	368.41	-389.816	-27.0428	-568.259	-332.758	-275.214	-459.837	35.0539	343.139	-76.8832	557.597			-511.11	54.6478	-55.8713	-559.594	576.47	552.202	-517.989	-551.857	-600.349	416.807	-535.707	-271.143	139.477	338.406	-447.783	-34.9259	-508.125	32.0429	-320.317	525.108	-289.238	-605.341
6.53	-134.395	-620.586	-626.49	180.551	163.968	536.44	-246.377	-308.591	40.6014	-478.774	325.774	560.598	671.419	-406.534	368.485	-390.16	-29.1977	-568.575	-332.375	-275.649	-460.143	35.1898	341.746	-76.8263	559.442			-510.336	54.3852	-56.0136	-561.798	577.714	553.595	-517.647	-552.579	-601.048	418.691	-536.694	-271.825	139.473	337.478	-447.785	-34.758	-509.905	32.1018	-319.923	524.932	-288.71	-605.419
6.54	-133.254	-620.853	-628.753	180.432	164.224	536.881	-247.459	-309.404	39.298	-479.009	326.057	562.408	673.251	-407.011	369.483	-392.163	-28.7056	-570.51	-334.744	-275.092	-459.65	35.4031	341.955	-77.5552	559.498			-509.598	54.7289	-56.0981	-561.053	579.886	553.881	-519.599	-552.729	-601.925	419.583	-536.959	-272.652	141.472	336.83	-447.927	-33.8824	-509.969	32.502	-320.748	525.127	-290.707	-605.457
6.55	-132.62	-622.714	-629.309	180.839	164.036	538.114	-247.592	-310.994	38.881	-479.001	327.763	561.524	673.007	-408.248	370.012	-392.565	-30.3392	-570.491	-334.593	-275.352	-460.028	36.8202	340.729	-77.4528	561.603			-509.156	54.342	-56.3498	-563.361	579.742	554.738	-519.889	-553.497	-602.057	420.364	-538.512	-272.21	141.416	335.898	-448.825	-33.7212	-510.844	32.4229	-320.586	527.384	-291.278	-606.871
6.56	-131.169	-622.761	-630.739	181.006	164.2	539.201	-247.986	-311.385	37.6558	-479.3	327.453	562.574	674.799	-409.128	371.386	-394.458	-30.4146	-572.435	-335.721	-275.693	-459.536	37.7068	340.692	-77.8945	561.9			-508.104	54.589	-56.3322	-564.081	580.697	555.764	-520.661	-553.659	-602.892	422.354	-538.363	-273.507	143.421	335.006	-450.162	-32.9272	-511.55	33.0613	-320.944	527.402	-291.732	-606.737
6.57	-130.825	-624.582	-631.783	180.973	164.104	540.024	-248.922	-313.45	36.8251	-479.465	329.354	564.115	674.576	-409.617	371.303	-394.798	-31.1362	-572.779	-337.623	-275.87	-459.847	37.5113	339.738	-78.1158	563.574			-507.925	54.1991	-56.5786	-564.1	582.216	556.247	-522.22	-554.624	-603.666	422.888	-539.883	-274.85	143.259	334.521	-449.718	-33.0078	-511.612	32.8339	-321.759	528.116	-293.372	-607.235
6.58	-129.089	-624.914	-633.082	181.237	164.067	541.397	-248.744	-313.602	36.3041	-479.556	329.045	563.567	676.197	-411.52	372.65	-397.801	-32.3387	-574.176	-337.11	-276.04	-459.492	39.195	339.358	-78.4384	564.08			-506.627	54.3592	-56.5132	-566.301	582.105	557.602	-522.197	-554.907	-603.984	424.124	-539.913	-274.137	145.309	333.053	-450.961	-32.3088	-512.929	33.6596	-321.404	530.072	-293.129	-608.055
6.59	-129.16	-626.786	-633.639	181.482	164.085	541.596	-249.926	-315.339	35.1112	-479.79	330.977	565.014	675.989	-411.576	372.848	-397.424	-32.598	-574.621	-339.477	-276.289	-459.721	38.6222	338.836	-78.4768	565.198			-506.822	53.844	-56.8482	-565.709	584.587	557.626	-524.229	-555.705	-605.076	425.952	-541.244	-275.363	145.128	333.466	-451.57	-32.3141	-512.947	33.507	-322.721	529.771	-295.673	-608.158
6.6	-127.203	-627.187	-635.24	181.52	164.014	543.306	-249.522	-315.555	34.4202	-479.917	330.496	566.244	677.559	-412.776	373.596	-400.644	-34.234	-575.878	-339.611	-276.855	-459.626	40.8572	338.167	-78.8725	565.812			-505.259	54.0295	-56.9656	-567.832	584.154	559.662	-523.904	-555.833	-605.867	426.222	-541.071	-276.522	147.426	331.802	-451.989	-31.778	-514.579	34.368	-322.672	531.759	-295.818	-609.379
6.61	-127.32	-628.752	-636.082	181.735	164.159	543.36	-250.968	-317.13	34.0217	-480.139	332.782	565.872	677.509	-413.361	374.077	-400.601	-33.8447	-576.462	-340.72	-276.785	-459.819	40.971	337.797	-79.1152	566.494			-505.448	53.4928	-57.1319	-567.787	586.584	559.52	-526.162	-556.437	-606.241	428.157	-542.626	-276.336	147.186	331.824	-453.027	-31.8362	-514.512	34.1221	-323.279	532.275	-297.63	-609.428
6.62	-125.16	-629.272	-637.017	181.858	164.184	544.905	-250.71	-317.225	32.6284	-480.24	332.52	567.463	679.039	-413.551	374.739	-403.25	-35.7764	-577.629	-342.437	-277.434	-460.037	41.9206	336.746	-79.3787	567.768			-503.857	53.5987	-57.408	-569.034	587.166	561.674	-526.01	-556.334	-607.685	428.963	-542.583	-277.691	149.517	330.989	-454.062	-31.3643	-516.007	34.8295	-324.41	533.255	-298.83	-609.933
6.63	-125.258	-630.696	-638.757	182.012	164.155	544.924	-251.719	-319.402	32.3722	-480.324	333.966	568.456	678.963	-414.395	374.766	-402.983	-35.3671	-578.218	-342.169	-277.926	-460.217	43.7663	336.56	-79.4299	567.91			-504.283	53.1658	-57.7212	-570.067	587.865	561.529	-527.668	-557.218	-608.136	429.591	-543.498	-278.609	149.395	330.29	-453.915	-31.4233	-516.327	34.7258	-324.139	534.726	-299.154	-610.889
6.64	-122.894	-631.386	-639.03	182.195	164.159	546.471	-251.957	-319.451	31.4393	-480.495	335.441	568.043	680.315	-414.784	375.841	-405.67	-36.3055	-579.647	-344.318	-278.031	-460.388	43.452	334.938	-80.1012	569.381			-502.885	53.1894	-57.8202	-570.026	590.103	563.851	-528.285	-557.123	-609.163	431.603	-544.377	-278.269	151.688	329.791	-455.589	-31.0844	-516.765	35.4895	-325.623	534.999	-301.171	-610.614
6.65	-123.265	-632.742	-641.232	182.197	164.319	546.431	-252.384	-322.215	30.5531	-480.711	335.272	569.874	680.254	-415.862	375.465	-405.3	-35.9387	-579.985	-343.982	-279.01	-460.571	46.0117	334.881	-79.7135	569.602			-503.149	52.7514	-58.2936	-572.294	589.651	563.587	-528.978	-558.218	-610.397	431.9	-544.335	-280.259	151.341	328.828	-455.914	-31.042	-517.499	35.2728	-325.592	537.676	-301.269	-611.872
6.66	-120.634	-633.709	-641.197	182.432	164.163	547.957	-253.494	-321.852	30.288	-480.83	337.67	570.333	681.659	-416.474	376.289	-408.117	-36.4684	-581.797	-345.398	-278.763	-460.559	45.5575	333.428	-80.5675	570.921			-502.063	52.7669	-58.472	-571.628	592.198	565.913	-530.601	-558.075	-610.766	433.712	-545.741	-280.736	153.626	328.652	-456.664	-30.6259	-518.058	36.2068	-326.42	537.112	-302.18	-611.782
6.67	-120.748	-635.196	-643.35	182.582	164.511	548.179	-253.085	-324.636	29.2626	-480.964	337.099	570.458	681.861	-418.987	376.222	-407.647	-36.7508	-582.113	-346.18	-279.352	-460.864	47.4325	333.134	-80.4133	571.247			-502.309	52.24	-58.8661	-573.514	591.991	566.02	-530.263	-559.31	-612.457	434.884	-545.614	-280.894	153.522	327.621	-457.996	-30.6666	-518.925	35.9897	-327.116	539.053	-303.5	-612.289
6.68	-118.984	-636.082	-643.412	182.638	164.118	549.249	-254.893	-324.73	28.806	-480.999	339.394	572.097	682.83	-418.683	376.683	-410.278	-37.5486	-583.496	-346.439	-279.978	-461.06	47.8133	331.897	-80.496	572.273			-500.572	52.3249	-59.0881	-574.46	593.879	567.745	-532.313	-559.27	-613.261	435.544	-546.9	-283.09	155.581	327.951	-458.263	-30.6113	-519.774	36.6466	-327.27	540.792	-303.504	-612.807
6.69	-118.647	-637.256	-645.244	183.106	164.45	549.891	-254.851	-326.11	28.3109	-481.324	339.393	571.866	682.92	-420.804	376.626	-410.16	-38.7929	-584.146	-348.156	-279.667	-461.488	48.4066	331.569	-81.1148	573.189			-500.634	52.1076	-59.3452	-574.29	594.728	568.336	-532.177	-559.851	-614.139	437.683	-546.907	-282.776	155.407	327.489	-459.088	-30.1741	-520.941	36.5023	-328.318	540.397	-306	-612.501
6.7	-117.465	-638.369	-645.229	183.53	164.258	551.002	-256.173	-326.704	27.4571	-481.398	341.063	572.562	684.024	-421.489	376.693	-411.845	-38.7445	-585.544	-347.656	-280.66	-461.311	49.7636	330.446	-81.386	573.961			-499.296	52.0208	-59.3556	-576.744	595.147	569.747	-533.829	-560.254	-615.716	438.347	-547.755	-283.92	157.546	327.172	-460.193	-30.526	-521.153	37.1998	-328.199	542.864	-305.352	-613.308
6.71	-116.677	-639.372	-647.913	183.64	164.206	551.811	-256.63	-328.375	27.4276	-481.67	341.641	573.821	684.111	-422.096	376.25	-412.231	-39.6971	-586.336	-349.699	-280.276	-461.939	50.0963	330.078	-81.3356	575.232			-499.036	51.8178	-59.3611	-575.789	596.453	571.081	-534.305	-560.719	-615.958	439.668	-548.064	-285.78	157.187	327.311	-460.509	-30.1775	-521.809	37.109	-329.23	542.687	-307.255	-612.994
6.72	-116.263	-640.652	-646.972	185.191	163.972	552.443	-257.222	-328.412	26.6312	-482.059	342.318	573.422	685.198	-423.839	376.381	-413.353	-39.7222	-587.284	-349.693	-281.035	-461.676	51.2411	329.167	-82.3349	575.861			-498.303	51.7618	-59.5432	-577.49	596.617	571.941	-535.145	-561.012	-617.667	441.16	-548.44	-285.103	159.656	326.979	-461.427	-30.4057	-522.397	37.5229	-329.423	544.486	-308.395	-613.532
6.73	-115.15	-641.508	-649.034	185.381	163.685	553.575	-258.244	-331.053	26.1916	-482.07	344.713	574.418	685.302	-423.971	375.668	-414.086	-41.3047	-588.112	-350.498	-280.899	-462.12	52.5794	328.566	-81.6625	577.51			-497.604	51.5813	-57.9799	-577.905	598.528	573.897	-536.297	-561.807	-618.597	441.617	-549.54	-286.774	159.522	327.039	-462.856	-30.5526	-523.698	37.4652	-329.625	545.101	-308.836	-614
6.74	-114.567	-642.74	-648.75	186.196	163.623	553.757	-258.359	-330.908	25.9302	-482.507	344.215	575.314	686.231	-426.088	376.042	-415.801	-40.9522	-589.38	-352.431	-281.304	-461.896	52.5194	327.92	-82.3124	577.706			-497.004	51.4327	-58.447	-578.015	598.514	574.209	-536.404	-561.668	-619.248	443.757	-549.373	-288.122	161.515	326.421	-462.599	-30.4001	-523.739	37.9132	-330.201	546.159	-309.949	-613.967
6.75	-113.617	-643.726	-650.465	187.063	163.35	554.824	-259.832	-333.565	24.9997	-482.58	346.752	574.804	686.4	-425.998	375.315	-416.015	-42.8753	-590.217	-351.571	-281.662	-462.292	54.8826	327.145	-82.139	579.662			-496.237	51.1912	-56.5618	-579.465	600.049	576.618	-538.423	-562.625	-621.068	444.353	-550.481	-287.502	161.438	326.693	-464.136	-30.7001	-525.267	37.8025	-330.193	547.337	-310.118	-615.189
6.76	-112.681	-644.697	-651.416	186.902	163.129	554.88	-259.535	-333.738	24.8681	-482.681	346.474	576.013	687.189	-428.362	375.173	-418.616	-42.5581	-591.383	-353.865	-281.589	-462.325	54.2696	326.45	-82.4826	579.765			-495.691	51.1374	-56.2404	-579.407	601.602	576.682	-537.999	-562.353	-621.492	445.519	-550.297	-289.793	163.395	325.17	-464.676	-30.3851	-525.266	38.1596	-330.538	547.851	-311.74	-614.6
6.77	-111.64	-645.716	-651.492	188.335	163.259	555.92	-261.288	-335.242	24.2186	-482.725	348.451	576.347	687.45	-428.093	374.287	-418.577	-44.6106	-592.182	-354.311	-282.34	-462.505	56.417	325.862	-82.0624	581.339			-495.062	51.0362	-56.2973	-581.419	601.591	579.094	-540.029	-563.148	-622.801	447.118	-551.047	-290.444	163.495	325.438	-465.802	-30.4549	-526.769	38.0237	-330.735	549.667	-312.008	-615.87
6.78	-110.632	-646.622	-653.495	188.046	162.815	555.862	-261.208	-335.963	23.4306	-482.67	349.383	576.26	688.178	-430.239	374.361	-421.044	-44.3977	-593.355	-354.586	-281.842	-462.611	56.8589	325.476	-82.1618	581.58			-494.43	51.0508	-53.5474	-580.955	603.999	579.171	-540.032	-563.063	-624.216	447.45	-551.695	-290.359	165.313	323.801	-465.899	-29.8051	-526.717	38.2307	-330.613	549.239	-313.329	-616.24
6.79	-109.068	-647.717	-653.189	189.019	162.849	556.9	-262.203	-337.11	23.4173	-482.715	349.494	577.63	688.449	-430.111	373.251	-421.464	-46.2293	-594.297	-357.179	-283.203	-462.673	57.6751	324.842	-82.0198	582.986			-493.658	51.0474	-54.0022	-582.763	604.106	581.611	-540.943	-563.697	-624.613	449.32	-551.703	-292.757	165.572	323.689	-467.423	-29.783	-528.205	38.3332	-330.569	551.627	-314.831	-616.626
6.8	-108.96	-648.698	-654.568	189.53	162.764	556.77	-263.193	-337.79	22.5947	-482.699	352.067	577.443	689.269	-431.682	373.299	-422.314	-46.464	-595.756	-356.4	-282.972	-462.466	59.2278	324.57	-81.84	583.523			-493.534	51.0524	-51.8748	-583.591	604.54	581.517	-542.125	-563.978	-626.302	450.323	-552.14	-292.615	167.364	322.792	-467.359	-28.8215	-528.31	38.4446	-330.827	552.018	-314.8	-617.626
6.81	-106.537	-649.531	-654.874	189.684	162.642	557.869	-263.249	-339.547	22.2403	-482.664	351.564	577.761	689.548	-431.754	372.595	-423.927	-47.8052	-596.329	-356.411	-283.341	-463.009	58.9998	323.544	-81.8254	584.548			-492.248	51.0872	-51.1706	-584.178	606.39	583.723	-541.841	-564.672	-627.115	450.949	-552.298	-293.163	167.727	321.98	-468.003	-27.814	-529.455	38.4348	-330.16	552.484	-316.931	-617.839
6.82	-106.816	-650.666	-655.408	190.655	162.828	557.875	-264.92	-339.862	21.9126	-482.913	354.272	578.952	690.268	-432.494	372.411	-423.885	-48.6798	-597.791	-358.475	-284.815	-462.463	60.494	323.427	-81.5623	585.487			-492.16	51.1962	-50.3587	-586.048	605.902	583.864	-543.815	-564.865	-627.873	452.863	-552.541	-295.271	169.384	322.063	-468.789	-27.2754	-530.055	38.5109	-329.354	554.032	-317.585	-618.141
6.83	-104.37	-651.666	-656.16	190.436	162.766	558.83	-264.699	-342.108	21.1018	-482.865	353.865	578.333	690.625	-433.53	371.624	-425.413	-49.1692	-598.401	-358.087	-284.365	-463.019	60.823	322.303	-81.5933	586.444			-491.095	51.2885	-48.8228	-585.319	608.778	585.591	-543.317	-565.711	-629.416	453.413	-552.677	-294.666	169.76	320.659	-469.638	-26.2735	-530.539	38.7143	-329.443	553.948	-317.9	-618.899
6.84	-104.574	-652.575	-656.281	191.465	162.711	559.404	-266.605	-342.402	20.7928	-483.026	356.416	579.447	691.678	-433.925	371.608	-425.535	-50.8547	-599.698	-360.344	-285.737	-462.746	61.2287	322.284	-81.2821	588.079			-491.094	51.265	-48.4722	-587.761	608.521	586.35	-545.27	-565.837	-630.037	454.731	-552.727	-295.732	171.477	320.772	-469.227	-26.0209	-532.072	38.561	-329.036	555.99	-319.598	-618.501
6.85	-101.937	-653.811	-657.519	191.37	162.924	559.899	-266.374	-344.772	20.3477	-483.129	356.302	580.481	692.039	-435.666	370.606	-427.187	-50.6576	-600.397	-360.665	-285.757	-462.949	63.2291	321.102	-81.0112	588.622			-489.985	51.3364	-46.7221	-587.933	610.27	587.373	-544.909	-566.457	-630.927	456.377	-552.538	-297.219	172.046	318.753	-470.588	-24.5238	-531.908	38.7392	-328.909	556.318	-319.369	-619.917
6.86	-102.313	-654.696	-657.223	191.791	162.845	561.147	-267.826	-345.559	19.4436	-483.199	358.02	579.89	692.952	-435.518	370.577	-426.96	-52.621	-601.61	-361.65	-286.318	-462.592	62.8622	321.022	-80.6713	590.646			-490.159	51.2142	-46.677	-588.866	611.861	588.685	-546.479	-566.608	-632.284	456.783	-552.912	-296.746	173.369	319.149	-471.386	-24.4031	-533.671	38.6273	-328.843	557.268	-321.999	-619.495
6.87	-99.3301	-655.787	-658.689	192.451	162.727	561.285	-268.477	-347.283	19.1222	-483.511	359.071	581.919	693.547	-437.395	370.253	-429.263	-52.4423	-602.557	-363.888	-287.944	-462.551	65.0431	320.109	-80.66	590.96			-489.149	51.2732	-44.5324	-590.395	611.891	589.063	-547.053	-566.925	-632.544	458.582	-552.962	-298.184	174.047	317.376	-471.413	-22.5102	-533.177	38.7293	-328.444	559.335	-321.511	-620.713
6.88	-99.7872	-656.931	-658.297	192.198	163.101	563.474	-268.098	-348.329	18.281	-483.51	359.526	582.6	694.399	-437.013	369.903	-428.989	-54.169	-603.28	-363.444	-287.473	-462.479	65.1176	319.974	-80.2134	593.726			-489.269	51.1934	-44.5339	-590.173	613.055	589.971	-547.006	-567.413	-633.856	459.567	-553.053	-298.948	175.285	317.721	-471.782	-22.5613	-535.228	38.8494	-328.472	558.818	-323.763	-620.851
6.89	-96.8959	-657.936	-659.907	193.21	163.023	563.54	-269.771	-348.931	17.6484	-483.627	361.696	582.339	695.17	-439.493	369.285	-431.406	-54.3025	-604.706	-366.066	-288.639	-462.524	66.0221	319.003	-80.3226	594.349			-488.475	51.3568	-42.4324	-592.546	614.226	590.094	-548.945	-567.28	-634.662	460.322	-553.527	-298.898	176.222	316.191	-472.824	-20.7878	-534.92	38.7626	-328.072	560.367	-324.389	-621.169
6.9	-96.9948	-659.061	-659.397	192.923	163.316	565.821	-270.234	-350.83	17.3837	-483.776	361.294	583.722	695.761	-439.465	369.815	-431.227	-54.9782	-605.331	-365.816	-289.629	-462.248	68.1374	318.658	-79.6772	595.721			-488.44	51.2083	-42.424	-592.127	614.459	591.119	-549.272	-567.937	-635.115	462.104	-553.281	-300.181	176.956	316.175	-473.152	-21.2711	-536.045	38.9792	-328.039	561.651	-324.998	-622.428
6.91	-94.6798	-660.418	-660.86	193.672	163.362	565.828	-270.348	-351.116	16.1346	-483.795	363.876	584.393	696.677	-440.764	369.254	-433.551	-55.663	-606.979	-367.363	-289.949	-462.384	67.4206	318.015	-79.7054	595.958			-487.907	51.2659	-40.5101	-593.915	616.786	591.141	-549.167	-567.828	-636.607	462.554	-554.116	-300.378	178.067	314.946	-473.305	-19.242	-536.372	38.7407	-327.892	561.76	-326.293	-622.402
6.92	-93.7078	-661.149	-660.354	193.9	163.502	568.145	-271.348	-353.409	15.7636	-483.955	363.685	584.784	697.324	-441.634	369.218	-433.751	-55.9907	-607.296	-368.91	-290.902	-462.008	68.3815	317.254	-79.7189	596.813			-487.701	51.222	-40.5953	-594.7	616.402	592.425	-551.035	-568.538	-636.966	464.06	-553.812	-300.84	179.012	314.622	-474.224	-19.5346	-537.186	39.0043	-327.659	563.589	-326.66	-622.587
6.93	-92.4853	-662.478	-662.044	194.078	163.548	568.259	-271.064	-353.814	15.0932	-483.919	366	585.956	698.311	-441.956	369.661	-434.83	-56.7353	-608.988	-368.622	-291.152	-462.259	69.9522	316.804	-79.4783	596.936			-487.408	51.2544	-38.3356	-594.968	619.165	592.367	-550.801	-568.634	-637.95	465.435	-554.614	-301.855	180.165	313.849	-474.367	-17.9346	-537.89	38.9207	-327.54	563.245	-328.038	-623.599
6.94	-91.147	-663.42	-661.541	194.929	163.419	569.943	-272.589	-355.814	14.1493	-483.899	365.808	586.083	698.733	-443.125	369.837	-435.736	-57.2699	-609.328	-371.277	-292.367	-461.812	69.4049	315.858	-79.4491	597.722			-487.179	51.122	-38.4551	-596.979	618.701	593.042	-553.076	-569.392	-639.278	466.105	-554.493	-301.7	180.801	313.311	-474.5	-17.7162	-538.625	39.1756	-327.443	565.29	-328.686	-623.401
6.95	-90.2306	-664.698	-662.882	194.57	163.481	570.374	-272.573	-356.328	13.7795	-483.797	367.81	587.721	699.876	-443	370.299	-435.834	-58.4428	-610.882	-370.803	-292.764	-461.858	71.571	315.608	-79.1986	598.182			-486.779	51.1547	-36.3204	-596.534	620.735	593.11	-552.795	-569.504	-639.681	467.828	-555.237	-303.416	182.189	312.781	-474.875	-16.9978	-539.924	39.3256	-327.318	565.222	-329.809	-624.598
6.96	-88.6003	-665.62	-662.438	195.762	163.335	571.924	-273.542	-357.692	12.8755	-483.756	368.573	587.662	700.22	-444.736	371.067	-437.172	-58.4167	-611.271	-372.36	-293.434	-461.772	72.5591	314.439	-79.2907	598.803			-486.256	51.0031	-36.33	-598.803	621.802	593.933	-554.044	-570.207	-641.006	468.893	-555.364	-303.213	182.847	311.693	-476.034	-15.823	-540.063	39.5051	-327.211	566.41	-331.173	-625.071
6.97	-88.0784	-666.66	-663.205	195.426	163.096	572.279	-274.188	-357.97	12.3427	-483.744	369.019	588.518	701.441	-444.4	370.575	-437.299	-60.5234	-612.806	-374.468	-294.281	-461.764	72.3481	314.418	-79.2188	599.655			-486.056	50.9935	-34.1917	-598.836	622.194	593.798	-555.162	-569.972	-641.795	469.507	-555.847	-304.032	184.156	311.597	-475.161	-15.3306	-542.174	39.7453	-327.117	567.36	-331.325	-625.288
6.98	-85.9189	-667.697	-662.97	195.92	163.226	574.26	-273.98	-359.849	11.8374	-483.569	370.457	589.827	701.59	-446.37	371.95	-438.876	-59.9561	-613.102	-373.541	-294.768	-461.911	73.6301	312.873	-79.4399	600.087			-485.353	50.9192	-34.0655	-599.563	623.705	594.729	-554.907	-570.95	-642.45	471.421	-556.199	-305.366	184.79	309.984	-474.852	-14.0287	-541.733	39.8285	-327.171	567.826	-334.05	-625.625
6.99	-85.6616	-668.916	-663.206	197.103	163.115	574.855	-275.666	-360.065	11.0857	-483.633	370.784	589.362	703.107	-445.949	372.086	-439.076	-61.8346	-614.995	-376.196	-295.641	-462.396	74.5938	312.939	-79.7386	601.129			-485.36	50.7847	-32.1325	-601.403	624.114	594.852	-556.688	-570.771	-643.942	472	-556.696	-304.805	185.95	310.07	-476.352	-13.5089	-543.752	40.1606	-326.957	569.468	-333.749	-626.375
7	-83.647	-670.058	-663.251	196.482	163.403	576.576	-275.352	-362.362	10.8156	-483.557	371.941	591.066	703.139	-448.055	372.627	-440.288	-61.9216	-614.922	-376.689	-295.845	-461.735	74.9431	311.348	-79.9237	601.224			-484.544	50.6572	-32.0968	-601.074	625.083	595.555	-556.777	-571.741	-644.346	473.076	-556.979	-306.356	186.422	308.491	-475.88	-12.476	-543.767	40.1044	-326.795	569.152	-334.709	-626.604
7.01	-83.4678	-670.785	-663.781	198.049	163.27	577.616	-276.546	-362.194	10.1604	-483.383	372.061	591.641	705.06	-447.783	374.427	-441.277	-62.9234	-616.647	-377.232	-296.991	-462.145	77.0268	311.502	-80.1097	602.507			-484.524	50.6396	-29.8849	-603.308	626.328	596.056	-557.986	-571.735	-645.606	474.621	-557.494	-306.932	187.7	308.351	-477.56	-11.3347	-545.196	40.681	-326.879	571.378	-336.382	-627.492
7.02	-81.1549	-672.153	-663.869	197.942	163.397	578.631	-276.776	-364.698	9.55116	-483.312	373.66	591.478	705.055	-449.734	374.206	-442.084	-63.6248	-617.042	-379.26	-297.02	-461.666	76.7003	309.727	-80.225	602.346			-483.573	50.5436	-29.8831	-603.585	626.592	596.505	-558.425	-572.616	-646.967	475.044	-557.986	-306.6	188.084	306.952	-476.99	-10.7238	-545.804	40.5718	-326.878	570.715	-336.094	-627.405
7.03	-81.3463	-672.797	-664.383	198.46	163.346	580.175	-277.24	-364.932	9.36504	-483.193	373.818	593.303	707.286	-450.018	375.286	-443.163	-64.0852	-618.601	-378.537	-298.164	-461.859	79.2408	309.885	-80.0266	603.625			-483.721	50.5405	-27.798	-603.977	629.369	597.336	-558.965	-572.819	-647.276	476.662	-558.225	-308.163	189.431	306.611	-477.34	-9.7716	-546.575	41.2963	-326.862	573.165	-338.457	-628.4
7.04	-78.7352	-674.436	-664.545	200.049	163.434	580.784	-278.755	-366.442	8.52648	-483.002	375.506	593.692	707.402	-450.946	375.739	-444.152	-65.0262	-618.771	-381.144	-298.354	-461.695	78.8329	308.232	-80.3981	602.753			-482.779	50.3159	-27.9708	-605.764	628.798	597.538	-560.356	-573.142	-649.035	477.736	-558.696	-308.48	189.794	305.949	-478.395	-8.8578	-548.045	41.1322	-327.846	572.953	-338.126	-628.076
7.05	-79.1704	-674.895	-665.087	199.865	163.212	582.841	-278.142	-366.68	8.32848	-483.035	375.851	593.822	709.484	-452.779	376.426	-445.094	-65.165	-620.689	-381.38	-298.968	-461.824	80.4008	308.441	-80.3194	603.341			-482.984	50.3743	-25.7968	-605.334	631.463	598.6	-560.222	-573.196	-649.508	478.393	-559.13	-308.355	191.005	304.692	-479.044	-8.27016	-548.165	42.0888	-327.742	574.012	-340.488	-629.147
7.06	-76.3838	-676.799	-665.411	201.159	163.423	582.943	-279.974	-368.832	7.7916	-482.595	377.033	595.304	709.43	-452.737	376.857	-446.781	-66.3421	-621.108	-381.54	-299.817	-462.043	81.3626	306.768	-80.7188	602.625			-482.143	49.9547	-25.703	-606.607	631.873	598.666	-561.981	-573.677	-650.521	480.302	-559.483	-309.968	191.107	304.859	-479.529	-7.11408	-550.355	41.8826	-328.251	575.622	-340.628	-628.935
7.07	-76.6894	-676.868	-665.914	201.362	163.032	585.397	-279.954	-368.955	7.87188	-482.53	378.701	594.996	711.344	-454.457	378.1	-447.243	-66.2419	-622.594	-384.292	-299.953	-461.974	81.3077	306.97	-80.8423	602.367			-482.272	50.0422	-23.5597	-607.112	632.851	599.885	-562.158	-573.621	-651.901	480.675	-559.93	-309.41	192.411	303.211	-481.194	-6.96912	-549.937	42.7506	-329.56	574.995	-341.625	-629.452
7.08	-73.8608	-678.857	-666.03	201.696	163.097	585.372	-280.581	-371.685	7.74228	-482.271	378.353	596.1	711.606	-454.888	377.988	-448.936	-67.5742	-622.877	-383.929	-300.873	-461.894	83.036	305.034	-80.5712	602.351			-481.739	49.6423	-23.9341	-607.201	634.182	599.763	-562.97	-574.208	-652.522	481.875	-559.93	-310.463	192.434	303.471	-480.513	-6.05124	-552.358	42.5165	-329.291	577.388	-342.64	-629.775
7.09	-73.9543	-679.348	-666.689	202.56	162.95	587.796	-281.76	-371.497	7.26648	-481.767	381.303	597.29	712.927	-455.19	379.107	-449.53	-67.3684	-624.386	-385.435	-301.137	-462.045	83.0519	305.105	-80.8284	602.084			-481.843	49.7472	-21.1978	-608.535	634.378	600.908	-564.045	-574.261	-654.003	483.576	-560.722	-311.602	193.837	302.537	-481.769	-6.01656	-551.855	43.4701	-329.958	577.144	-343.352	-630.078
7.1	-71.4694	-681.177	-666.825	203.066	162.644	587.883	-281.512	-374.391	6.87624	-481.637	380.893	596.789	713.371	-456.323	379.328	-450.673	-68.6932	-624.64	-387.352	-301.72	-461.957	84.3674	303.479	-80.4847	602.082			-481.318	49.2082	-21.7573	-608.522	635.925	600.716	-564.171	-574.807	-655.237	483.784	-560.525	-310.793	193.845	301.855	-482.51	-5.30196	-554.127	43.1144	-330.935	578.892	-344.348	-630.401
7.11	-71.1269	-681.279	-667.672	203.58	162.285	590.254	-283.116	-374.47	6.62016	-480.997	382.766	598.011	714.449	-456.439	379.813	-451.313	-68.6522	-626.246	-386.874	-301.745	-462.282	85.7345	303.514	-80.4025	602.338			-481.155	49.3309	-18.8094	-609.469	636.524	601.513	-565.879	-574.813	-655.87	485.656	-561.116	-312.197	195.265	301.274	-482.923	-5.63868	-553.954	44.0696	-330.91	579.334	-345.485	-630.695
7.12	-68.9996	-683.36	-667.829	204.577	162.017	590.523	-282.616	-375.9	6.04068	-480.689	383.674	599.21	714.708	-457.982	380.206	-452.712	-69.7247	-626.452	-389.389	-302.493	-462.175	85.6142	301.912	-80.4186	602.591			-481.021	48.5027	-19.309	-610.478	637.399	601.368	-565.532	-575.133	-657.537	486.652	-561.233	-313.565	195.161	300.002	-483.255	-4.82784	-555.93	43.7684	-331.755	580.285	-346.172	-630.719
7.13	-68.4865	-683.437	-668.569	204.673	161.597	592.839	-284.111	-376.945	5.72964	-480.484	384.381	598.628	715.989	-458.092	380.91	-453.111	-69.9062	-628.211	-389.481	-303.285	-462.479	88.364	301.853	-80.5694	603.299			-480.894	48.5952	-16.907	-610.524	639.122	601.883	-567.636	-575.564	-658.21	487.294	-561.315	-312.692	196.712	299.788	-484.447	-5.16	-556.138	44.6314	-331.94	581.887	-348.207	-631.309
7.14	-66.5389	-685.325	-668.873	206.005	161.478	593.681	-284.294	-378.543	5.42808	-479.884	386.024	599.48	716.284	-459.942	380.555	-455.156	-70.6549	-628.656	-390.329	-303.283	-462.589	87.9238	300.618	-80.1371	603.824			-480.83	47.745	-17.0282	-612.422	638.833	601.831	-567.828	-575.838	-659.312	489.049	-561.883	-313.975	196.728	297.756	-484.311	-4.22064	-557.511	44.4439	-332.064	581.792	-347.794	-630.909
7.15	-65.8865	-685.458	-669.467	205.84	160.846	594.947	-284.695	-379.445	4.80744	-479.767	386.138	600.778	717.551	-459.639	381.325	-455.218	-71.073	-630.223	-392.281	-304.704	-462.724	89.2609	300.457	-80.5433	604.401			-480.795	47.6914	-14.9983	-611.806	641.426	602.16	-568.94	-576.054	-660.811	489.63	-561.59	-315.878	198.271	298.253	-484.919	-4.4448	-558.422	45.0196	-332.492	583.994	-350.609	-631.438
7.16	-64.1363	-687.402	-669.842	207.222	161.096	596.975	-285.56	-381.076	4.69596	-479.204	387.412	600.767	717.756	-461.96	381.493	-457.527	-71.5396	-630.497	-391.911	-304.657	-462.532	90.3512	299.743	-79.9422	604.919			-480.866	46.7513	-15.0516	-613.69	640.831	602.196	-570.418	-576.485	-661.225	490.908	-562.109	-315.633	198.118	295.776	-485.892	-3.36132	-559.181	44.8986	-332.66	584.164	-350.848	-631.545
7.17	-63.1531	-687.513	-670.303	207.829	160.41	597.32	-285.488	-382.087	4.03992	-479.054	387.823	601.074	719.182	-461.9	381.871	-457.456	-72.4504	-632.054	-393.95	-305.205	-462.926	90.68	299.605	-80.5745	605.611			-480.8	46.573	-13.0028	-614.385	642.965	602.281	-570.397	-576.358	-662.555	492.388	-562.05	-316.06	199.671	295.473	-487.039	-3.51312	-561.089	45.3084	-332.482	584.882	-351.82	-631.591
7.18	-61.7767	-689.351	-670.659	207.955	160.267	599.844	-286.548	-382.634	3.3576	-478.931	388.447	602.217	719.472	-463.385	381.751	-460.271	-72.3314	-632.774	-393.817	-306.026	-462.82	91.8467	299.164	-80.0388	606.43			-480.946	45.791	-12.9397	-614.596	644.101	602.655	-572.612	-576.937	-663.771	492.775	-562.182	-318.114	199.751	294.883	-486.714	-1.9788	-560.884	45.442	-332.875	586.542	-353.093	-631.917
7.19	-60.3576	-689.293	-671.073	209.358	160.271	599.891	-286.167	-384.124	3.22128	-478.721	389.092	602.499	720.758	-463.966	382.464	-459.836	-73.7983	-634.008	-395.466	-305.678	-463.226	92.4698	298.931	-80.5212	606.757			-481.024	45.6629	-11.1308	-616.339	644.336	602.742	-572.131	-576.87	-664.365	494.425	-561.85	-318.414	201.247	293.88	-488.089	-1.95012	-563.211	45.6226	-332.505	586.587	-353.248	-631.951
7.2	-59.3562	-691.142	-671.411	209.036	159.742	602.386	-287.071	-384.527	2.33364	-478.562	389.778	602.32	721.29	-464.634	382.143	-462.234	-73.5882	-634.844	-395.935	-307.216	-463.222	93.4198	298.542	-80.0982	607.697			-481.18	44.7539	-10.3684	-615.665	645.471	603.12	-574.141	-577.15	-665.851	495.806	-562.017	-318.529	201.581	294.053	-488.745	-0.5712	-562.893	45.8138	-332.55	588.548	-355.217	-632.231
7.21	-57.6227	-691.091	-671.793	210.53	159.644	602.372	-287.418	-386.427	2.16432	-478.543	392.078	602.694	722.306	-465.769	382.604	-461.997	-75.148	-636.002	-396.684	-306.855	-463.46	95.4451	298.41	-80.1948	607.801			-481.377	44.5964	-8.91492	-617.494	645.958	603.187	-574.334	-577.355	-666.297	496.287	-562.474	-319.051	202.563	292.932	-489.045	-0.4134	-565.182	46.0195	-332.657	588.675	-354.795	-632.532
7.22	-57.1602	-692.964	-671.984	210.987	159.112	605.074	-287.702	-387.066	1.68084	-478.289	391.663	603.125	723.142	-465.938	382.346	-463.482	-74.8408	-636.527	-398.107	-307.624	-463.413	94.8876	298.168	-80.4516	608.71			-481.418	43.4773	-8.19612	-618.106	646.985	603.492	-575.476	-577.371	-667.057	498.033	-562.399	-320.541	203.363	293.25	-490.428	0.2958	-564.777	46.2823	-332.231	589.907	-357.361	-632.303
7.23	-55.2259	-692.804	-672.374	210.901	158.78	605.034	-288.181	-388.744	0.88512	-478.048	394.586	603.342	724.175	-467.722	382.32	-464.244	-76.1532	-637.977	-397.831	-308.079	-463.664	97.4983	297.956	-80.4193	608.898			-481.447	43.3663	-6.73296	-618.153	648.469	603.54	-576.126	-577.493	-668.34	499.23	-562.665	-321.129	204.265	291.621	-490.946	0.87708	-566.742	46.4608	-332.378	590.966	-357.041	-632.734
7.24	-54.9997	-694.531	-672.58	212.542	158.781	607.561	-288.398	-389.327	0.77856	-477.863	394.476	603.186	724.74	-467.858	382.051	-465.19	-76.2208	-638.737	-400.433	-308.163	-463.421	97.7078	297.6	-80.3657	609.474			-481.431	42.3592	-6.0966	-619.412	648.299	603.838	-576.953	-577.709	-668.598	500.049	-562.781	-321.155	204.828	291.842	-490.594	1.01628	-566.796	46.7167	-331.751	591.432	-359.575	-632.81
7.25	-52.6543	-694.685	-673.231	212.286	158.153	607.89	-288.884	-390.796	-0.31404	-477.565	396.659	603.751	725.721	-469.573	382.103	-465.849	-77.2636	-640.252	-400.11	-309.379	-463.376	98.1979	297.429	-80.358	610.051			-481.505	42.0408	-4.46244	-620.006	651.344	603.957	-578.121	-577.941	-669.947	501.991	-562.576	-323.232	205.77	289.987	-492.065	1.67592	-568.287	46.8083	-331.863	593.373	-359.509	-632.8
7.26	-52.6642	-696.169	-673.588	212.559	158.226	610.179	-289.002	-390.906	-0.87876	-477.501	397.18	603.908	726.78	-469.336	382.185	-467.641	-77.9664	-640.953	-401.383	-308.82	-463.335	99.6974	297.232	-80.5943	610.36			-481.529	41.18	-3.16968	-619.679	650.995	604.161	-578.102	-578.174	-670.467	502.342	-562.943	-323.962	206.583	290.22	-491.508	1.9518	-569.156	47.0792	-331.347	593.263	-361.242	-632.928
7.27	-49.8061	-696.09	-674.047	213.456	158.206	610.413	-289.553	-393.468	-1.3926	-477.27	398.065	603.945	727.399	-470.892	382.306	-468.295	-78.368	-642.52	-403.407	-310.359	-462.848	99.2627	296.902	-80.1358	611.541			-482.035	41.0028	-2.23752	-620.805	652.776	604.23	-580.233	-578.502	-671.137	503.681	-562.607	-323.703	207.068	288.795	-490.654	2.3916	-569.947	47.2856	-330.725	595.487	-362.325	-632.656
7.28	-50.2847	-697.68	-674.43	213.681	157.744	612.676	-289.683	-393.387	-3.0378	-476.972	399.149	604.667	728.541	-471.064	382.342	-470.221	-79.4443	-643.471	-402.683	-309.855	-462.977	101.739	296.686	-80.1808	611.802			-481.95	39.7154	-0.89796	-620.76	653.67	604.565	-579.787	-578.526	-672.362	505.261	-563.005	-325.924	207.973	288.113	-490.501	2.76816	-571.495	47.5154	-331.165	595.254	-362.588	-632.974
7.29	-47.3326	-697.605	-674.814	214.249	158.05	613.056	-289.934	-396.428	-3.40152	-476.825	399.64	604.453	728.868	-472.2	382.435	-470.438	-79.4114	-644.814	-404.393	-310.984	-462.703	101.99	296.349	-79.8078	613.02			-483.163	39.5129	-0.03228	-621.353	653.868	604.642	-581.883	-579.06	-672.464	505.76	-562.545	-326.065	208.164	287.214	-490.392	3.11688	-571.878	47.768	-329.645	596.958	-364.265	-632.936
7.3	-47.4758	-699.01	-675.257	215.487	157.848	615.011	-290.333	-396.337	-4.88508	-476.452	400.864	604.788	730.609	-472.641	382.417	-472.843	-80.3903	-645.716	-405.201	-311.25	-462.87	102.934	296.175	-79.9025	613.608			-483.091	38.3546	1.5918	-622.699	655.328	604.844	-581.795	-578.956	-673.337	507.507	-562.997	-326.859	209.244	286.438	-490.215	3.3498	-572.959	48.0229	-329.072	597.704	-364.665	-632.923
7.31	-45.5052	-698.83	-675.414	214.844	158.132	615.957	-290.306	-398.265	-6.0012	-476.318	401.116	605.562	730.658	-473.244	382.506	-473.319	-80.2409	-646.885	-405.797	-311.679	-462.721	104.549	295.691	-79.4867	614.748			-483.95	38.1389	1.92744	-622.195	655.673	604.933	-583.312	-579.254	-674.293	508.148	-562.606	-328.275	209.394	286.062	-490.072	3.582	-573.225	48.1403	-328.864	598.52	-366.157	-633.351
7.32	-44.8224	-700.306	-676.379	215.735	158.156	617.216	-290.546	-398.798	-6.49344	-476.084	403.084	605.118	732.75	-474.102	382.444	-475.529	-81.2798	-648.15	-407.559	-312.554	-462.716	104.678	295.591	-79.4086	615.53			-484.215	36.9652	4.07172	-623.917	656.959	605.072	-583.083	-579.166	-674.549	509.052	-563.047	-327.97	210.313	285.248	-489.962	3.70356	-574.732	48.3786	-327.955	599.57	-366.893	-633.319
7.33	-43.8594	-700.219	-676.103	216.572	158.142	618.818	-290.699	-400.493	-8.23032	-475.826	402.963	605.988	732.633	-474.668	382.441	-476.043	-80.9917	-648.929	-407.193	-312.204	-462.67	105.735	295.061	-79.1652	617.247			-484.522	36.7135	3.7596	-624.787	658.752	605.046	-584.971	-579.369	-675.897	511.069	-562.733	-329.865	210.473	284.901	-489.749	3.78444	-574.799	48.5329	-328.067	599.827	-368.127	-633.407
7.34	-42.9292	-701.612	-677.331	216.06	158.017	619.685	-290.851	-400.954	-8.83476	-475.712	405.38	606.419	734.989	-475.815	382.554	-478.236	-82.3505	-650.233	-409.716	-313.47	-462.466	106.935	294.994	-79.1177	617.757			-485.025	35.668	6.42144	-624.155	658.679	605.168	-585.204	-579.348	-676.396	511.511	-563.283	-330.898	211.278	283.653	-489.511	3.88716	-576.835	48.5204	-327.056	601.683	-369.458	-633.719
7.35	-41.7031	-701.55	-677.018	217.166	158.314	621.776	-291.12	-403.152	-9.79068	-475.545	405.146	606.123	734.867	-476.075	382.594	-478.969	-82.0307	-651.1	-409.646	-313.091	-462.309	107.12	294.257	-78.7643	619.7			-485.435	35.4151	6.096	-626.478	660.14	604.479	-586.741	-579.584	-677.089	513.147	-562.905	-330.409	211.475	283.511	-489.222	4.12572	-576.673	48.7104	-326.97	601.668	-369.8	-633.585
7.36	-40.3486	-703.044	-678.341	216.825	158.197	622.18	-291.182	-403.832	-11.2938	-475.421	407.527	606.967	737.179	-477.464	382.644	-481.179	-83.6431	-652.143	-410.96	-313.963	-462.473	109.778	294.398	-79.1574	619.839			-485.985	34.1341	8.41308	-626.142	661.035	604.419	-587.969	-579.905	-678.273	514.426	-563.55	-332.643	212.106	281.854	-488.985	3.94848	-578.844	48.7793	-326.395	603.28	-371.286	-634.349
7.37	-39.5345	-703.098	-677.85	217.401	158.41	624.364	-291.128	-405.102	-11.7238	-475.338	407.372	607.605	736.989	-478.05	382.649	-481.506	-83.2032	-653.265	-411.991	-314.023	-462.222	108.799	293.477	-78.439	622.016			-486.235	33.8861	8.09244	-626.937	661.314	603.469	-588.018	-579.729	-678.571	515.095	-563.472	-334.05	212.192	281.166	-488.779	4.10796	-578.611	48.8868	-325.847	603.713	-371.953	-634.242
7.38	-37.642	-704.356	-679.236	218.598	158.481	624.906	-291.663	-406.203	-13.0874	-475.277	409.376	607.352	739.602	-478.414	382.612	-483.738	-84.758	-654.024	-412.26	-314.473	-462.32	110.895	293.578	-78.5713	622.363			-486.877	32.6718	10.5172	-628.778	663.21	603.244	-590.61	-580.239	-679.584	517.024	-563.94	-333.034	212.69	280.574	-488.543	3.85224	-580.627	49.0457	-325.707	605.322	-372.925	-634.551
7.39	-37.3099	-704.5	-679.198	218.361	158.595	626.77	-291.314	-406.982	-14.0423	-475.196	410.163	607.908	739.366	-479.897	382.769	-484.142	-84.3971	-655.135	-414.304	-314.88	-462.087	111.79	292.757	-78.418	623.749			-486.912	32.3569	10.8487	-628.399	662.869	602.243	-590.492	-580.053	-680.408	517.99	-564.205	-335.024	212.774	278.305	-488.343	3.95376	-580.43	49.1137	-324.887	605.669	-374.003	-635.077
7.4	-35.0928	-705.543	-679.845	219.919	158.686	627.851	-291.921	-408.355	-14.57	-475.198	411.172	608.523	741.813	-479.708	382.835	-486.548	-86.0078	-655.761	-413.901	-315.198	-462.195	112.046	292.849	-78.17	623.99			-487.689	31.3126	12.2687	-629.724	665.576	601.66	-591.703	-580.344	-680.569	518.719	-564.34	-337.012	213.444	278.771	-488.097	3.56424	-582.287	49.3832	-324.969	607.546	-374.857	-634.993
7.41	-35.3004	-705.949	-680.22	219.589	158.376	629.097	-291.867	-409.629	-15.8152	-475.196	413.014	608.564	741.747	-481.017	382.882	-486.918	-86.0045	-657.157	-416.184	-315.597	-462.29	113.228	292.043	-78.0403	625.383			-487.655	30.8326	13.54	-629.86	665.223	601.261	-592.742	-580.531	-681.916	520.917	-564.791	-335.984	213.64	276.024	-487.864	3.40704	-582.484	49.4606	-324.083	607.832	-376.941	-635.429
7.42	-32.5045	-707.1	-680.521	220.874	158.725	629.984	-292.16	-410.91	-16.1702	-475.259	412.937	608.668	743.873	-481.043	382.943	-488.633	-87.0827	-657.532	-415.887	-315.832	-462.088	113.409	292.273	-77.7754	625.861			-488.564	29.6924	14.3088	-630.547	667.154	600.644	-592.78	-580.896	-682.236	521.46	-564.686	-337.629	214.145	276.395	-487.479	2.83068	-583.913	49.7591	-324.154	609.675	-376.701	-635.242
7.43	-33.1102	-707.495	-680.929	220.787	158.501	631.577	-292.562	-411.685	-16.9676	-475.231	415.736	608.839	744.033	-481.678	382.97	-490.065	-87.3359	-659.32	-417.497	-316.289	-462.418	114.709	291.331	-77.4392	627.274			-488.379	29.4252	15.3691	-630.934	667.924	600.227	-594.694	-581.064	-683.302	522.551	-565.052	-339.29	214.411	274.226	-487.232	2.43588	-584.341	49.9367	-323.354	610.217	-379.276	-635.76
7.44	-30.2036	-708.599	-680.977	222.058	158.703	632.181	-292.52	-413.141	-18.0103	-475.106	415.298	609.267	745.956	-482.337	382.975	-490.888	-87.9864	-659.344	-418.122	-316.457	-462.896	116.115	291.655	-77.6176	628.183			-489.35	28.4141	16.0709	-631.606	668.369	599.828	-594.468	-581.503	-684.656	524.229	-564.992	-338.698	214.839	273.74	-487.001	1.77096	-585.395	50.1979	-323.209	611.616	-379.382	-636.235
7.45	-30.5209	-709.089	-681.981	222.138	158.865	634.178	-293.31	-413.316	-18.1796	-475.08	417.304	608.958	746.382	-482.167	383.069	-492.04	-88.5004	-661.256	-418.373	-316.818	-462.428	115.83	290.661	-77.0126	628.946			-489.258	28.0183	17.8806	-631.945	669.787	599.6	-596.943	-581.289	-684.866	524.667	-565.019	-340.224	215.08	272.657	-486.67	1.48572	-586.025	50.5562	-323.13	612.713	-380.166	-636.425
7.46	-28.2828	-709.908	-681.634	222.756	158.958	634.433	-293.124	-415.513	-19.1789	-474.758	418.418	609.422	748.173	-482.901	383.121	-492.515	-89.0762	-661.549	-419.952	-317.129	-462.708	117.537	290.956	-77.1948	630.234			-490.094	27.089	17.9956	-632.36	669.941	599.403	-596.492	-581.753	-686.455	526.398	-565.175	-341.109	215.442	271.78	-486.304	0.96264	-586.985	50.8228	-322.197	613.366	-382.03	-636.643
7.47	-27.6472	-710.549	-682.733	223.992	159.292	636.713	-293.954	-415.357	-19.6344	-474.541	419.004	609.075	748.764	-482.682	383.134	-493.944	-89.9779	-662.982	-420.014	-317.308	-462.429	117.306	290.097	-77.1014	630.646			-490.305	26.6492	19.7735	-633.11	671.726	599.371	-598.524	-581.734	-687.331	527.476	-565.132	-340.816	215.775	270.877	-486.085	0.39948	-588.124	51.1997	-322.755	614.878	-381.966	-637.554
7.48	-26.3755	-711.255	-682.412	223.834	159.371	636.742	-294.034	-418.321	-19.9891	-474.366	421.697	609.594	750.288	-483.485	383.17	-494.258	-89.7899	-663.468	-420.972	-317.763	-462.503	117.356	290.372	-76.9031	632.474			-490.811	25.8565	19.9856	-633.357	672.523	599.146	-599.031	-582.196	-687.799	528.201	-565.136	-342.176	216.073	269.935	-485.807	-0.11016	-588.638	51.3103	-321.76	615.101	-384.431	-637.318
7.49	-24.7306	-711.985	-683.774	225.2	159.452	639.056	-294.323	-418.161	-20.986	-473.84	421.167	609.539	750.888	-483.167	383.272	-495.95	-90.9847	-664.677	-421.65	-317.82	-462.61	119.316	289.618	-76.9253	632.381			-491.436	25.1616	22.2649	-634.127	673.163	599.233	-599.967	-582.33	-689.4	529.803	-565.148	-342.218	216.434	269.584	-485.552	-0.927	-590.955	51.935	-322.631	616.899	-383.952	-639.014
7.5	-24.4255	-712.587	-683.452	224.996	159.837	639.457	-295.072	-419.596	-21.1597	-473.542	424.026	609.691	752.295	-484.266	383.338	-496.791	-90.6109	-665.268	-421.922	-318.309	-462.409	120.068	289.816	-76.5359	634.556			-491.595	24.4916	22.0936	-634.342	675.877	599.093	-601.865	-582.405	-689.789	530.668	-565.095	-343.466	216.749	267.931	-485.256	-1.40904	-590.29	51.9407	-322.198	617.104	-386.364	-639.551
7.51	-21.814	-713.505	-684.87	226.691	159.818	641.38	-294.89	-420.8	-21.9476	-473.35	423.63	609.897	753.02	-484.218	383.443	-498.041	-90.9414	-666.441	-423.256	-318.632	-462.761	120.129	289.005	-76.6394	634.531			-492.487	23.604	24.4679	-635.163	675.134	599.222	-601.456	-582.763	-690.918	531.201	-565.187	-344.721	217.231	267.629	-484.938	-2.03532	-593.214	52.6694	-322.463	619.354	-386.59	-639.836
7.52	-22.2086	-714.125	-684.506	226.097	159.857	642.336	-295.755	-421.701	-22.615	-472.622	425.798	609.77	754.294	-485.6	383.592	-499.665	-91.0685	-666.685	-423.308	-318.924	-462.371	121.106	289.158	-76.4761	636.644			-492.353	23.0737	24.1985	-635.431	678.105	599.293	-603.967	-582.898	-692.139	532.942	-564.99	-344.52	217.527	266.05	-484.671	-2.60196	-593.073	52.5108	-322.525	618.691	-387.676	-640.471
7.53	-19.1014	-715.045	-685.72	227.643	159.987	643.543	-295.5	-423.289	-23.008	-472.281	426.421	610.423	755.264	-485.983	383.662	-500.775	-90.9139	-668.114	-424.327	-319.329	-462.712	121.728	288.379	-75.8064	636.503			-493.393	22.1039	26.526	-636.049	678.287	599.383	-603.842	-583.325	-692.872	533.711	-565.05	-347.434	218.361	265.286	-484.453	-3.03672	-594.977	53.561	-321.798	621.229	-388.705	-641.426
7.54	-19.657	-715.479	-685.601	227.345	159.831	645.234	-296.09	-424.242	-24.0209	-471.919	427.333	610.328	756.29	-486.403	383.726	-501.972	-91.0189	-668.47	-425.031	-319.692	-462.359	122.212	288.482	-76.0888	638.342			-493.193	21.7273	26.3965	-636.538	679.343	599.544	-605.147	-583.523	-694.603	534.613	-564.961	-347.88	218.781	264.664	-484.267	-3.47172	-595.916	53.3923	-322.011	621.037	-389.081	-641.796
7.55	-16.655	-716.427	-686.594	228.606	159.706	645.633	-296.069	-426.299	-24.2857	-470.96	429.187	610.483	757.536	-487.77	383.825	-503.661	-90.9385	-669.938	-425.827	-320.106	-462.661	123.685	287.755	-75.4672	638.353			-494.235	20.6009	28.7167	-637.239	681.405	599.506	-605.853	-583.899	-695.165	536.033	-564.799	-348.002	219.796	262.913	-484.023	-3.94848	-596.825	54.7	-321.103	623.031	-390.847	-643.362
7.56	-16.4932	-716.748	-686.637	228.244	159.866	648.173	-296.33	-426.65	-24.9458	-470.8	428.943	611.306	758.313	-487.59	384.095	-504.531	-90.7889	-670.067	-426.632	-320.39	-462.349	123.314	287.708	-75.0934	639.831			-494.334	20.2318	28.706	-637.616	681.362	599.605	-606.733	-584.13	-696.448	536.539	-564.908	-350.08	220.068	262.715	-483.792	-4.30572	-598.779	54.3424	-321.102	623.029	-390.546	-642.937
7.57	-14.5696	-717.766	-687.537	228.578	159.606	648.191	-296.469	-428.607	-25.845	-470.053	431.853	611.096	759.48	-489.242	384.227	-506.242	-90.775	-671.561	-427.097	-321.015	-462.98	125.206	287.182	-75.0676	639.89			-495.062	18.9269	30.9403	-638.454	682.532	599.45	-607.259	-584.565	-698.105	537.79	-564.517	-350.587	221.35	260.906	-483.54	-4.7538	-598.61	55.8352	-320.571	624.95	-392.02	-644.952
7.58	-13.8703	-718.18	-687.709	229.308	159.707	650.399	-296.78	-428.686	-26.0418	-469.2	431.352	611.516	760.014	-489.01	384.3	-507.007	-90.7591	-671.899	-428.314	-321.293	-463.432	124.95	287.033	-74.5864	640.404			-495.228	18.3964	30.8644	-639.161	683.637	598.884	-608.421	-584.681	-698.505	539.103	-564.674	-350.86	221.637	260.991	-483.257	-5.106	-601.203	55.5132	-320.072	625.315	-393.841	-644.686
7.59	-12.3744	-719.092	-688.508	228.114	159.456	650.308	-297.116	-430.61	-26.9041	-468.969	433.605	611.904	761.182	-490.938	384.405	-508.659	-90.7933	-673.29	-428.702	-321.81	-463.549	125.878	286.618	-74.5165	640.456			-495.793	17.4756	32.9381	-639.492	683.808	598.794	-609.369	-585.353	-700.434	539.526	-564.219	-352.24	223.005	258.808	-483.018	-5.48832	-600.802	56.8976	-319.89	626.584	-393.603	-645.876
7.6	-11.074	-719.635	-688.79	229.119	159.633	652.881	-297.215	-430.686	-27.3809	-467.717	434.096	612.261	761.571	-490.717	384.61	-509.493	-90.6426	-673.506	-430.355	-322.146	-464.053	126.97	286.502	-74.1558	641.346			-496.35	16.7065	32.978	-640.905	686.247	598.196	-610.195	-585.478	-701.147	540.968	-564.383	-352.574	222.861	259.238	-482.814	-5.8506	-603.161	56.5914	-318.658	628.089	-395.792	-646.716
7.61	-10.4869	-720.424	-689.577	227.969	159.497	653.209	-297.719	-433.174	-27.6438	-467.215	435.265	612.595	762.77	-492.279	384.807	-511.364	-90.814	-675.099	-430.125	-322.44	-464.118	126.962	286.146	-73.7848	641.789			-496.572	15.7375	35.0558	-640.732	685.72	598.007	-611.269	-586.515	-701.833	541.848	-564.102	-353.037	224.426	257.409	-482.641	-6.29112	-602.726	57.8941	-319.163	628.308	-395.87	-646.71
7.62	-8.43024	-721.072	-689.918	228.552	159.701	655.443	-297.555	-433.348	-28.8151	-466.494	436.513	613.472	763.033	-492.63	384.919	-512.096	-90.5155	-675.34	-432.118	-323.141	-464.291	127.705	285.908	-73.7813	642.587			-497.512	14.8829	35.3581	-642.371	688.759	597.867	-611.587	-586.386	-703.11	542.631	-563.935	-355.007	224.235	257.009	-482.382	-6.6126	-604.855	57.6364	-317.502	630.475	-396.957	-647.648
7.63	-8.50896	-721.807	-690.739	228.082	159.788	656.354	-298.41	-434.992	-29.1614	-465.437	437.07	613.4	764.063	-493.576	385.08	-514.467	-90.6726	-676.954	-432.282	-323.117	-464.464	128.027	285.661	-72.784	643.432			-497.446	13.9218	36.9766	-642.157	688.569	597.813	-613.637	-587.318	-703.57	544.162	-564.068	-354.467	225.976	256.376	-482.173	-7.44804	-604.971	58.8755	-317.742	630.571	-397.982	-647.983
7.64	-5.94792	-722.278	-691.071	227.997	159.784	657.962	-298.076	-435.893	-29.9682	-464.989	438.866	614.251	764.493	-494.36	385.252	-514.574	-90.447	-677.199	-433.36	-324.239	-464.657	128.277	285.444	-72.6312	643.868			-498.424	13.1728	37.5037	-643.593	690.116	597.947	-613.419	-587.101	-704.168	544.848	-563.457	-356.493	225.724	255.362	-481.94	-7.44564	-606.724	58.6348	-316.725	632.76	-398.2	-648.525
7.65	-6.22116	-723.199	-692.078	228.258	159.925	659.102	-299.119	-436.294	-31.1755	-464.234	438.888	614.442	765.734	-494.751	385.515	-517.69	-90.5675	-678.702	-434.091	-323.821	-465.041	129.871	285.252	-72.4019	645.163			-498.297	12.1396	38.8673	-644.13	691.48	598.132	-615.646	-587.717	-705.379	545.767	-563.755	-356.788	227.681	255.376	-481.863	-8.41164	-607.089	59.761	-316.393	632.563	-400.262	-649.925
7.66	-3.4884	-723.396	-692.867	228.23	159.893	660.524	-298.861	-437.9	-31.4846	-463.396	441.008	614.714	765.917	-495.936	385.654	-517.366	-90.3929	-679.059	-434.522	-324.883	-465.27	129.333	284.923	-71.6669	645.218			-499.334	11.6831	40.0943	-644.804	691.613	598.388	-615.202	-588.05	-705.653	547.075	-562.977	-357.113	227.499	253.962	-481.579	-8.4	-608.316	59.532	-316.141	634.831	-399.785	-649.707
7.67	-4.15164	-724.589	-693.22	228.882	159.912	661.937	-299.417	-438.312	-32.9321	-462.978	440.562	615.773	767.219	-496.027	385.834	-520.437	-90.2435	-680.261	-435.397	-325.05	-465.582	131.445	284.72	-71.8631	646.565			-499.243	10.4711	40.3074	-646.444	693.033	598.61	-617.173	-588.315	-707	547.695	-563.216	-359.482	229.417	254.338	-481.463	-9.11664	-609.723	60.4356	-315.079	635.455	-402.585	-651.494
7.68	-1.40088	-724.646	-694.661	228.816	159.782	662.707	-299.761	-440.218	-33.402	-462.364	443.046	615.526	767.458	-497.434	386.037	-520.073	-90.2072	-680.911	-435.73	-325.174	-465.234	131.083	284.373	-70.8662	646.662			-500.215	10.0894	42.3595	-646.304	693.279	598.814	-617.899	-588.883	-707.343	548.502	-562.849	-358.843	229.287	252.551	-481.361	-8.98524	-609.945	60.3598	-315.405	636.05	-402.412	-651.277
7.69	-1.3428	-726.049	-694.52	229.692	159.8	664.896	-299.57	-440.528	-34.2306	-461.714	442.913	616.17	768.686	-497.581	386.271	-523.082	-90.0503	-681.792	-436.878	-326.174	-465.867	132.812	284.154	-71.1389	647.454			-500.299	8.75376	41.9854	-648.58	694.824	598.959	-618.457	-588.918	-707.949	549.773	-562.824	-360.187	231.228	252.895	-481.113	-9.72156	-611.862	60.967	-313.772	638.828	-403.323	-652.501
7.7	0.32676	-726.064	-696.232	229.479	159.955	665.09	-300.038	-442.28	-35.713	-461.449	444.304	616.989	768.86	-499.024	386.477	-522.752	-90.165	-682.79	-437.048	-325.904	-465.669	133.148	283.828	-70.211	648.027			-500.906	8.41788	44.1828	-648.171	695.971	599.096	-619.977	-589.436	-708.746	550.175	-562.656	-361.913	231.126	250.585	-480.861	-9.71928	-611.8	61.0553	-314.503	637.994	-404.951	-652.804
7.71	1.626	-727.458	-696.052	230.117	160.034	667.658	-299.917	-442.653	-36.0103	-460.677	446.241	616.603	770.151	-498.968	386.667	-525.684	-89.8888	-683.71	-438.47	-326.688	-466.046	133.462	283.539	-69.785	648.849			-501.4	7.08432	43.6877	-650.037	696.306	599.129	-620.253	-589.457	-708.966	551.631	-562.305	-361.057	233.207	251.029	-480.823	-10.2233	-614.12	61.5718	-313.301	640.755	-404.933	-652.874
7.72	1.79688	-727.449	-697.977	230.511	160.271	667.599	-300.101	-444.305	-37.5655	-460.078	446.004	617.647	770.262	-500.458	386.928	-525.591	-90.0064	-684.846	-438.554	-326.672	-466.09	135.522	283.295	-69.5837	649.439			-501.676	6.86652	45.8564	-650.581	698.791	599.25	-621.739	-590.055	-709.738	552.624	-562.373	-363.038	233.022	248.612	-480.693	-10.4341	-613.556	61.7687	-313.507	641.221	-406.876	-654.278
7.73	4.20684	-728.841	-697.989	230.718	160.374	670.345	-300.092	-444.413	-38.4997	-459.832	448.87	618.395	771.63	-500.327	387.067	-527.611	-89.8567	-685.937	-439.925	-326.905	-466.141	134.909	283.105	-68.142	650.046			-502.754	5.52864	45.5849	-651.113	698.464	599.238	-621.86	-590.031	-710.229	553.171	-561.898	-364.53	235.318	248.991	-480.493	-10.3231	-616.134	62.2934	-313.721	642.025	-407.668	-653.97
7.74	4.12332	-728.715	-699.416	231.333	160.384	670.454	-299.986	-446.775	-39.3421	-459.088	448.541	617.769	771.587	-501.655	387.144	-527.904	-89.688	-687.071	-441.029	-327.554	-466.278	137.278	282.757	-68.3046	651.135			-502.768	5.36244	47.1991	-652.69	699.794	599.396	-623.384	-590.873	-710.673	554.64	-562.072	-364.063	235.045	246.918	-480.47	-10.4999	-615.858	62.5382	-312.594	644.02	-408.331	-655.457
7.75	5.42256	-729.951	-699.75	231.435	160.471	672.663	-300.21	-446.631	-41.3273	-458.599	450.48	618.821	773.053	-501.688	387.333	-529.372	-90.1691	-688.147	-440.772	-327.063	-466.499	136.825	282.57	-67.8116	651.328			-503.565	3.95076	47.2331	-652.324	700.84	599.362	-623.64	-590.624	-711.565	555.475	-561.669	-365.634	237.39	246.745	-480.309	-10.4399	-617.695	63.0203	-313.334	643.728	-410.263	-655.278
7.76	6.18768	-729.839	-700.782	232.011	160.47	673.254	-299.944	-449.104	-41.6242	-458.282	451.897	619.444	773.037	-502.678	387.437	-529.746	-89.845	-689.108	-443.209	-328.242	-466.184	138.473	282.301	-66.9932	652.755			-504.117	3.79608	48.2928	-654.504	701.073	599.416	-625.119	-591.618	-711.726	555.94	-561.405	-366.378	237.331	245.345	-480.241	-10.1572	-618.466	63.3086	-312.619	646.2	-410.289	-656.227
7.77	6.99912	-731.238	-701.951	232.15	160.612	674.813	-300.257	-449.28	-43.1552	-457.492	452.25	619.02	774.446	-503.396	387.693	-531.927	-90.5134	-690.615	-443.153	-327.73	-466.74	139.394	282.088	-66.7598	652.953			-504.518	2.28192	49.2978	-654.006	703.192	599.389	-625.481	-591.888	-712.381	557.673	-561.363	-366.442	239.125	243.984	-480.05	-10.0802	-618.44	63.8257	-312.573	645.9	-411.583	-656.731
7.78	7.95924	-731.152	-702.362	232.497	160.793	676.331	-299.932	-450.479	-44.5075	-457.188	454.919	620.116	774.465	-503.474	387.785	-531.795	-90.6895	-691.166	-444.482	-328.716	-466.308	139.607	282.039	-65.876	654.116			-505.224	2.06832	49.6642	-655.985	702.756	599.278	-627.17	-592.278	-712.925	558.148	-560.716	-368.005	239.17	243.67	-479.97	-9.75888	-620.017	64.0248	-311.976	648.117	-412.469	-656.733
7.79	8.80572	-732.783	-703.826	232.78	160.794	676.936	-300.208	-451.377	-44.9417	-456.754	454.311	620.296	775.831	-504.602	387.926	-534.339	-91.1831	-692.747	-446.013	-328.622	-466.768	140.388	281.66	-65.758	654.822			-505.502	0.47928	51.0298	-656.019	705.283	599.295	-627.105	-592.634	-713.137	559.018	-560.902	-368.244	240.698	242.184	-480.047	-9.63828	-619.427	64.468	-311.325	648.702	-412.632	-657.347
7.8	10.483	-732.618	-703.932	232.971	160.674	679.315	-299.928	-452.829	-46.4273	-456.036	457.078	619.647	775.956	-504.673	387.872	-534.335	-92.2397	-693.259	-445.769	-328.997	-466.515	140.907	281.665	-64.8395	656.016			-506.305	0.41436	50.9326	-656.641	705.378	599.06	-629.019	-593.188	-713.887	560.696	-560.298	-368.268	240.915	241.91	-479.961	-9.47424	-621.552	64.7142	-311.518	649.905	-414.99	-657.087
7.81	10.9078	-734.292	-705.759	233.565	160.951	679.452	-300.293	-453.58	-47.3796	-455.894	457.015	620.33	777.406	-505.571	388.011	-536.584	-92.0758	-694.783	-448.259	-329.488	-466.577	141.641	281.332	-64.657	654.998			-506.5	-1.20636	52.7401	-658.899	706.682	599.148	-628.758	-593.589	-714.302	561.024	-560.206	-368.877	242.086	240.993	-479.928	-9.3048	-620.798	65.0467	-309.805	651.28	-414.506	-657.624
7.82	13.0951	-734.139	-705.45	233.411	160.978	682.038	-300.093	-455.338	-47.8008	-455.376	458.994	620.793	777.532	-505.901	388.384	-536.566	-93.8915	-695.44	-448.302	-329.266	-466.509	143.306	281.432	-64.2114	656.361			-507.345	-1.25604	52.2551	-658.05	708.398	599.043	-630.625	-594.297	-714.498	562.596	-559.801	-369.85	242.474	240.516	-479.9	-9.17796	-622.512	65.3261	-309.804	651.489	-417.305	-658.269
7.83	12.935	-735.633	-707.794	234.037	160.857	682.11	-300.409	-455.858	-49.6297	-454.894	460.08	620.631	778.957	-506.962	388.239	-539.622	-93.5483	-696.803	-449.347	-330.194	-466.304	143.011	281.135	-63.4714	656.562			-507.37	-2.79732	54.9511	-659.679	708.418	599.012	-630.583	-595.014	-715.705	564.014	-559.585	-369.631	243.595	239.421	-479.994	-8.6298	-622.409	65.5346	-309.098	653.859	-417.41	-658.103
7.84	15.3908	-735.686	-707.798	234.645	161.182	684.834	-300.376	-456.622	-50.1344	-454.772	460.543	621.117	779.319	-507.338	388.407	-539.097	-95.4289	-697.569	-450.885	-330.01	-466.436	145.568	281.187	-63.7178	658.038			-508.481	-2.90928	54.6467	-661.252	709.642	598.828	-632.206	-594.875	-715.885	564.43	-559.509	-371.268	243.984	239.01	-479.823	-8.65296	-623.94	65.7988	-308.028	653.42	-418.557	-659.501
7.85	15.1259	-737.408	-708.611	234.645	161.354	685.319	-300.586	-457.748	-51.1337	-454.258	462.875	621.66	780.436	-508.55	387.375	-542.363	-95.474	-698.541	-450.517	-330.503	-466.225	145.098	281.038	-62.6596	658.041			-508.394	-4.31172	56.5034	-660.648	710.386	598.721	-632.282	-595.81	-716.559	566.568	-559.206	-371.942	244.94	237.79	-480.852	-8.5632	-624.066	66.0484	-308.13	655.046	-419.892	-659.229
7.86	17.564	-737.272	-709.378	235.333	161.552	687.487	-300.768	-458.28	-52.7027	-454.09	462.354	621.536	781.024	-509.072	387.896	-542.109	-96.9041	-699.71	-452.769	-331.121	-466.269	147.299	281.103	-63.0643	660.223			-509.502	-4.16592	57.528	-662.655	711.048	598.325	-634.318	-595.624	-717.544	567.566	-559.093	-372.209	245.476	237.073	-480.401	-8.53296	-625.346	66.3089	-306.851	657.245	-419.794	-660.062
7.87	17.1178	-739.165	-709.148	235.569	161.865	687.919	-300.886	-459.958	-52.9002	-454.008	465.529	621.964	781.807	-510.268	386.916	-545.278	-97.6366	-700.544	-452.409	-331.058	-466.241	147.345	281.097	-62.5013	660.704			-509.469	-5.5902	58.2062	-662.397	712.821	598.071	-634.177	-596.756	-717.606	568.203	-558.793	-373.155	246.178	236.119	-481.697	-8.5374	-625.861	66.4518	-306.879	656.888	-422.134	-660.578
7.88	19.7666	-739.257	-709.834	236.103	161.887	689.961	-301.093	-460.35	-54.865	-453.58	465.108	622.288	782.718	-511.306	387.026	-544.89	-98.1104	-701.931	-454.039	-331.722	-465.807	148.073	281.106	-61.847	660.799			-510.846	-5.45676	59.9762	-663.753	712.374	597.42	-635.845	-596.912	-718.881	570.319	-558.792	-374.36	246.908	235.152	-481.387	-8.37444	-626.437	66.8125	-305.981	659.356	-421.808	-660.342
7.89	19.4516	-740.927	-709.636	236.325	162.118	690.536	-301.196	-461.932	-55.2096	-453.438	467.154	622.055	783.291	-511.621	386.117	-547.894	-99.5992	-702.601	-454.578	-332.029	-466.1	149.049	280.997	-61.7872	661.083			-510.663	-6.73764	60.3911	-664.161	715.133	597.179	-636.816	-597.999	-719.051	570.909	-558.67	-374.075	247.55	234.881	-483.004	-8.7126	-628.033	66.97	-305.553	659.415	-424.062	-661.212
7.9	21.0691	-741.043	-710.003	236.67	162.067	692.284	-301.493	-462.303	-56.4461	-453.319	468.253	622.984	784.486	-514.042	386.004	-547.9	-99.5662	-704.146	-455.181	-332.201	-465.986	149.314	280.837	-60.9463	661.626			-512.434	-6.61836	61.5256	-664.395	714.716	596.58	-637.084	-598.232	-719.833	572.143	-558.591	-376.344	248.402	233.041	-482.669	-8.35836	-627.931	67.4728	-305.218	661.207	-424.738	-660.842
7.91	21.618	-743.023	-709.501	237.199	162.177	693.132	-301.693	-463.783	-57.6568	-452.943	468.855	622.855	785.144	-513.599	385.58	-549.845	-100.818	-704.87	-456.398	-332.588	-466.002	150.928	280.841	-60.8585	661.929			-512.711	-7.91256	61.9562	-665.989	716.912	596.228	-639.282	-599.092	-720.663	573.839	-558.445	-376.289	249	233.491	-484.21	-9.04104	-629.794	67.7125	-304.628	661.912	-425.929	-661.76
7.92	21.7972	-742.953	-710.124	237.419	162.096	694.482	-301.782	-463.82	-57.9124	-452.849	470.999	623.119	786.502	-515.626	385.332	-550.465	-101.116	-706.027	-456.308	-332.859	-466.148	151.274	280.507	-60.3325	662.448			-514.021	-7.69524	63.5006	-665.57	717.626	595.661	-639.1	-599.002	-720.756	574.425	-558.343	-377.081	249.94	231.36	-484.168	-8.67756	-629.716	68.0462	-304.374	662.727	-427.674	-661.716
7.93	22.8065	-744.935	-709.54	238.146	162.116	695.723	-302.31	-465.966	-59.636	-452.431	470.645	623.847	786.921	-515.813	384.863	-551.386	-101.576	-707.489	-458.519	-333.159	-466.142	151.956	280.695	-59.8656	662.712			-515.147	-8.93544	63.822	-667.596	718.188	595.166	-641.855	-600.093	-721.842	575.934	-558.277	-379.263	250.416	231.509	-485.836	-9.174	-630.693	68.3646	-303.482	664.431	-427.87	-662.184
7.94	23.175	-744.875	-710.324	238.082	162.205	696.938	-302.224	-465.661	-60.5491	-451.814	473.496	623.757	788.399	-516.935	384.594	-552.524	-101.774	-707.858	-457.995	-333.52	-466.073	153.42	280.147	-60.1192	663.106			-515.562	-8.74296	65.7234	-666.995	719.651	594.722	-641.429	-600.191	-722.541	577.273	-558.03	-378.498	251.44	229.831	-485.822	-9.42864	-631.118	68.7719	-303.589	664.472	-429.191	-663.114
7.95	24.7622	-746.705	-709.776	238.837	162.137	698.21	-302.645	-468.256	-61.1752	-451.665	473.093	623.971	788.654	-517.368	384.385	-554.206	-102.614	-709.677	-459.9	-333.594	-465.916	152.688	280.409	-59.3238	663.155			-517.611	-10.1176	65.8478	-668.384	719.897	594.272	-643.825	-601.638	-722.983	577.755	-557.978	-379.771	251.79	229.308	-487.372	-9.54408	-632.336	69.0745	-302.842	666.595	-430.139	-662.651
7.96	24.5417	-746.722	-710.591	239.511	162.377	698.894	-302.776	-468.327	-62.5426	-451.066	475.774	624.279	790.342	-517.885	384.114	-554.512	-102.687	-709.912	-460.262	-334.027	-465.892	154.923	279.806	-59.3971	663.532			-517.343	-9.89832	67.7154	-669.794	721.235	593.977	-644.383	-601.733	-724.401	579.14	-557.907	-381.583	253.049	228.581	-487.554	-9.69108	-632.668	69.4774	-302.522	666.39	-430.931	-664.256
7.97	25.8906	-748.458	-710.024	239.373	162.241	700.699	-302.762	-469.224	-63.0122	-450.661	475.715	624.631	790.428	-519.072	383.938	-556.473	-103.626	-711.781	-460.835	-334.114	-465.903	155.643	280.008	-59.1107	663.51			-518.711	-11.2661	67.7664	-668.914	722.091	593.424	-645.403	-602.384	-724.791	580.32	-557.813	-381.418	253.191	226.732	-488.715	-9.81372	-634.012	70.0838	-302.276	668.659	-431.889	-664.804
7.98	26.3803	-748.553	-710.806	240.631	162.459	700.902	-302.897	-470.54	-63.7429	-450.396	477.465	624.304	791.926	-519.3	383.757	-557.558	-104.036	-711.659	-462.687	-334.531	-465.768	155.732	279.458	-58.4909	663.814			-519.264	-10.9837	69.5302	-670.938	722.528	593.166	-647.353	-602.941	-725.586	580.912	-557.931	-382.577	254.649	226.825	-489.35	-9.97308	-634.621	70.2065	-301.704	668.115	-432.512	-664.764
7.99	27.0688	-750.291	-710.31	240.833	162.478	703.158	-302.882	-470.794	-64.6554	-449.79	479.508	624.995	791.871	-519.875	383.548	-558.921	-104.402	-714.113	-462.283	-334.789	-466.341	157.857	279.603	-58.744	663.898			-519.92	-12.3994	69.8179	-671.445	725.293	593.123	-647.239	-603.248	-726.941	582.723	-558.018	-383.477	254.6	225.22	-490.153	-10.0484	-635.247	71.2631	-301.639	670.638	-434.759	-666.66
8	28.1388	-750.303	-711.101	241.4	162.521	703.19	-302.72	-473.094	-64.9513	-449.638	479.428	624.546	793.396	-520.228	383.448	-560.553	-105.282	-713.706	-464.543	-335.183	-466.636	157.247	279.107	-57.8179	664.246			-520.846	-12.0958	71.6888	-671.783	724.589	592.88	-649.821	-604.365	-727.304	583.396	-558.024	-383.347	256.339	224.918	-491.143	-10.2713	-636.633	71.2248	-301.067	670.503	-434.447	-666.028
8.01	28.7045	-752.276	-710.699	242.286	162.339	705.311	-302.888	-473.368	-65.7262	-449.282	481.948	624.97	793.519	-520.444	383.257	-561.745	-105.28	-716.162	-464.293	-335.457	-466.363	159.306	279.106	-58.1024	664.369			-521.371	-13.574	71.6346	-673.07	727.251	593.592	-649.278	-604.585	-728.437	584.301	-558.806	-385.499	256.385	223.824	-491.754	-10.3152	-636.931	72.4664	-301.029	672.394	-436.459	-667.773
8.02	29.9627	-752.371	-711.704	242.088	162.662	705.496	-302.643	-474.888	-66.3797	-448.855	481.96	625.175	794.668	-520.784	383.008	-563.317	-106.276	-715.962	-466.04	-335.807	-466.83	159.75	278.715	-57.3898	664.777			-522.729	-13.4557	74.0956	-672.648	727.952	593.323	-651.473	-605.037	-729.276	585.821	-558.385	-385.898	258.041	223.105	-492.868	-10.3444	-638.546	72.2586	-300.603	672.732	-437.227	-668.225
8.03	30.3701	-754.461	-711.231	243.61	162.307	707.417	-302.51	-475.133	-66.64	-448.578	482.939	625.17	794.93	-520.917	382.821	-564.508	-106.054	-718.247	-467.043	-336.124	-466.534	159.792	278.537	-56.9784	664.862			-523.161	-14.675	73.7195	-674.677	728.503	593.503	-651.824	-605.381	-729.69	586.245	-559.135	-385.719	258.395	222.283	-493.459	-10.2104	-638.69	73.5586	-300.451	674.404	-437.703	-668.373
8.04	31.7257	-754.382	-712.306	243.345	162.493	708.047	-302.402	-477.034	-67.571	-448.171	484.041	625.458	795.945	-521.415	382.057	-566.09	-107.273	-718.114	-467.264	-336.354	-466.765	162.112	278.387	-56.9858	665.15			-524.825	-14.3957	76.2131	-674.422	729.921	593.246	-652.991	-605.883	-730.87	587.55	-559.09	-388.115	259.967	221.256	-494.619	-10.2041	-640.718	73.357	-300.215	674.794	-440.312	-670.272
8.05	31.7677	-756.606	-711.972	244.239	162.116	709.52	-302.273	-477.045	-68.0712	-448.053	484.291	625.652	796.205	-521.7	381.982	-567.421	-106.555	-720.203	-469.477	-336.819	-466.878	161.478	278.122	-56.2969	665.17			-524.831	-15.7595	75.843	-675.519	730.035	593.314	-653.998	-606.143	-731.287	588.268	-559.574	-389.234	260.368	220.428	-495.087	-10.0592	-639.894	74.5672	-299.889	676.414	-439.884	-669.953
8.06	33.5496	-756.521	-712.915	245.187	162.157	710.53	-302.106	-479.392	-68.5874	-447.825	485.855	625.806	796.988	-522.531	381.405	-569.01	-106.693	-720.309	-469.093	-336.971	-466.659	162.567	277.921	-55.8343	665.286			-526.898	-15.6322	78.2752	-676.771	731.937	593.299	-654.822	-607.078	-731.941	588.993	-559.888	-388.506	261.762	218.935	-496.867	-9.77304	-642.46	74.4587	-299.983	676.937	-442.396	-670.954
8.07	33.408	-758.449	-712.956	244.706	161.905	711.408	-302.073	-479.339	-69.7675	-447.631	485.952	625.851	797.45	-522.503	381.508	-570.259	-106.791	-722.416	-471.159	-337.558	-466.972	163.5	277.664	-56.1143	665.813			-526.602	-16.7459	78.5641	-676.464	732.217	593.372	-656.108	-606.836	-732.79	590.334	-560.244	-390.54	262.794	218.664	-497.231	-9.6738	-642.25	75.724	-299.521	678.495	-442.572	-671.529
8.08	35.1838	-758.497	-713.312	246.087	161.879	712.815	-301.902	-481.075	-69.9902	-447.68	487.607	625.927	797.977	-523.709	381.158	-571.973	-106.002	-722.585	-471.409	-337.733	-466.502	163.287	277.409	-55.1808	665.872			-528.791	-16.8961	79.9525	-678.191	734.135	593.454	-656.378	-607.752	-733.218	590.927	-560.453	-391.814	263.847	216.381	-499.131	-9.45744	-643.573	75.5773	-299.536	679.511	-443.587	-671.837
8.09	34.9811	-760.537	-713.892	245.708	161.875	713.412	-301.83	-481.644	-70.7502	-447.423	487.647	625.866	798.519	-523.557	381.356	-572.507	-106.074	-724.006	-472.246	-338.304	-466.586	163.935	277.201	-55.6266	666.797			-528.468	-17.9026	81.6524	-678.207	735.021	593.577	-658.475	-607.69	-733.85	591.99	-560.697	-391.359	265.259	216.553	-499.275	-9.36276	-644.414	76.4758	-299.385	680.434	-444.881	-672.327
8.1	36.8606	-760.691	-713.768	246.836	161.891	714.958	-301.862	-482.782	-71.7133	-447.302	489.985	626.257	798.874	-524.817	380.701	-574.989	-105.762	-724.845	-473.684	-338.813	-466.432	164.455	277.093	-54.5383	666.846			-530.639	-18.0318	81.6912	-679.266	735.757	593.997	-658.004	-608.206	-734.502	593.484	-561.059	-394.147	265.713	213.957	-501.237	-8.96256	-645.49	76.7095	-299.072	682.232	-444.859	-673.683
8.11	36.5677	-762.261	-714.715	246.905	161.924	715.626	-301.644	-483.613	-71.9994	-447.175	489.513	626.269	799.524	-524.54	380.884	-575.065	-105.332	-726.116	-473.429	-338.816	-465.823	164.578	276.843	-54.8579	667.926			-530.443	-18.638	84.4457	-679.851	738.047	594.017	-660.746	-608.355	-734.603	594.11	-561.05	-394.43	267.707	214.309	-501.431	-8.84232	-647.27	77.579	-299.292	682.478	-447.366	-673.673
8.12	38.2988	-762.612	-714.512	247.555	161.909	716.986	-301.533	-485.357	-73.1432	-446.93	492.188	626.38	799.838	-525.981	380.13	-576.734	-105.331	-726.802	-475.54	-339.712	-465.904	166.145	276.639	-53.9429	668.18			-532.527	-18.979	84.0029	-680.386	737.354	594.779	-660.477	-608.914	-735.121	595.423	-561.659	-394.872	267.757	211.66	-503.307	-8.68032	-647.487	77.7412	-298.72	684.744	-447.094	-676.161
8.13	38.1829	-764.292	-715.206	247.787	161.764	717.951	-301.325	-486.225	-73.7436	-446.635	492.021	627.055	800.393	-525.706	380.366	-576.979	-104.772	-728.234	-475.324	-339.476	-465.09	165.716	276.446	-53.6812	668.773			-532.523	-19.4525	86.5892	-680.926	740.132	595.137	-662.5	-608.937	-734.301	597.081	-561.65	-397.512	269.947	211.905	-503.5	-8.23572	-649.878	78.7048	-298.948	684.721	-449.871	-675.613
8.14	39.1931	-764.873	-715.193	247.999	161.956	719.327	-301.263	-487.283	-74.2388	-446.497	493.812	626.783	800.564	-527.232	379.568	-579.143	-104.845	-728.766	-476.575	-340.573	-465.17	166.667	276.204	-53.3485	669.289			-533.936	-19.7593	86.1862	-681.292	740.266	596.024	-662.7	-609.391	-734.231	597.429	-562.002	-397.414	269.803	209.532	-505.176	-7.84848	-649.412	78.7325	-298.699	687.29	-449.414	-677.136
8.15	39.8146	-766.29	-715.894	248.712	161.801	720.283	-300.885	-488.382	-75.9812	-446.068	495.469	627.196	801.033	-527.448	379.639	-579.046	-104.352	-730.097	-477.417	-340.232	-464.602	167.647	275.955	-52.7069	669.984			-534.734	-20.1677	88.3626	-681.955	741.52	596.613	-664.238	-609.49	-733.748	599.467	-562.335	-397.954	272.002	209.448	-505.368	-7.59744	-652.087	79.6079	-298.509	686.906	-451.632	-678.884
8.16	40.1965	-766.937	-715.992	248.614	161.635	721.64	-300.83	-488.855	-76.4465	-445.759	495.449	628.015	801.344	-528.515	378.798	-581.598	-104.497	-730.424	-477.235	-341.222	-463.863	167.184	275.8	-52.1621	670.701			-535.293	-20.5435	88.6056	-682.402	743.062	597.328	-664.986	-609.849	-733.621	600.084	-562.2	-399.962	271.862	207.793	-506.878	-6.81084	-651.651	79.6312	-298.503	689.191	-451.793	-678.276
8.17	41.3669	-768.384	-716.426	249.445	161.771	722.172	-300.472	-490.861	-77.7719	-445.381	497.782	627.57	801.781	-528.785	378.529	-581.311	-104.076	-731.793	-479.196	-341.17	-464.163	168.656	275.559	-52.2012	671.101			-536.467	-20.9716	90.0241	-683.052	743.214	597.717	-666.043	-610.292	-733.322	601.361	-562.89	-399.941	273.905	207.313	-507.265	-6.72372	-654.438	80.4031	-297.664	689.707	-452.54	-680.915
8.18	41.4036	-768.939	-717.134	249.187	161.355	724.214	-300.216	-491.396	-79.4449	-444.758	497.898	628.525	802.09	-529.691	377.892	-583.946	-103.862	-732.273	-478.917	-341.565	-463.088	168.626	275.481	-51.1373	672.374			-536.679	-21.288	91.1008	-683.474	744.321	598.464	-667.416	-610.394	-733.113	603.003	-562.598	-400.736	274.022	206.189	-508.517	-6.07704	-654.141	80.604	-297.85	690.775	-453.881	-680.728
8.19	43.1444	-770.632	-717.336	250.371	161.449	724.268	-300.281	-493.479	-79.9584	-444.643	498.68	628.429	802.531	-530.636	377.243	-583.62	-103.88	-733.394	-478.008	-342.037	-463.459	169.082	275.212	-51.3446	672.383			-538.435	-21.8239	91.5354	-684.772	744.949	598.751	-667.678	-611.014	-733.063	603.322	-563.094	-401.779	275.914	204.914	-508.884	-5.8512	-656.22	81.1302	-297.087	692.248	-453.991	-681.599
8.2	42.9536	-771.386	-717.985	249.834	161.347	726.588	-299.671	-493.715	-82.2565	-444.002	499.84	628.798	802.821	-530.771	376.711	-586.365	-103.498	-734.04	-479.692	-341.867	-462.366	170.068	275.01	-50.1989	673.544			-538.476	-22.2205	93.1187	-684.57	745.625	599.385	-670.358	-610.805	-733.162	604.777	-563.085	-401.558	275.955	204.738	-509.418	-5.50464	-657	81.4273	-296.003	692.533	-455.998	-683.816
[truncated: 3 more columns]
