# Supplementary material for: Strong confinement of active microalgae leads to inversion of vortex flow and enhanced mixing
Source: eLife. 2021 Nov 22;10:e67663. doi: 10.7554/eLife.67663 (PMC8758135; doi:10.7554/eLife.67663)
Supplement: Figure 2—source data 2. [file elife-67663-fig2-data2.xlsx]

## Sheet: Sheet1
Figure 2B: Trajectories of representative 13 WOBBLER cells in H = 10 micron
	X-coordinates of the H10 Wobbler trajectories (micron)															Y-coordinates of the H10 Wobbler trajectories (micron)
Cell index →	1	2	3	4	5	6	7	8	9	10	11	12	13			1	2	3	4	5	6	7	8	9	10	11	12	13
Time (s) ↓
0	0	0	0	0	0	0	0	0	0	0	0	0	0			0	0	0	0	0	0	0	0	0	0	0	0	0
0.002	-0.100996	-0.059472	-0.286776	-0.100856	-0.003472	0.013426	-0.02814	0.053508	0.053088	-0.03766	-0.082978	-0.041678	0.10367			-0.117208	-0.290136	0.162638	0.09779	-0.004536	0.02765	0.030324	0.026446	-0.024794	-0.039382	0.069552	-0.11179	-0.23289
0.004	-0.08722	-0.119112	-0.597492	-0.235256	-0.066374	-0.040124	-0.091378	0.022372	0.065758	-0.06594	-0.1463	-0.080276	0.174958			-0.02303	-0.480508	0.229964	0.12747	-0.031864	0.04886	0.053606	0.004788	-0.049	-0.050092	0.089502	-0.251328	-0.273952
0.006	-0.0252	-0.121954	-0.837466	-0.352618	-0.10857	-0.141162	-0.157332	0.037016	0.113218	-0.08631	-0.20104	-0.12019	0.152096			0.032368	-0.419846	0.392336	0.177282	-0.110236	0.091518	0.08435	-0.019614	-0.069566	-0.039578	0.10178	-0.333774	-0.148988
0.008	0.017934	-0.072422	-0.87983	-0.460866	-0.174076	-0.241276	-0.211246	0.07322	0.132398	-0.12936	-0.243306	-0.185304	0.11235			0.191576	-0.164584	0.485394	0.148106	-0.149912	0.097104	0.103278	-0.148218	-0.074298	-0.057876	0.120288	-0.50064	0.023478
0.01	0.048818	-0.221592	-0.780822	-0.506772	-0.23618	-0.292782	-0.249536	0.145936	0.132244	-0.173502	-0.288862	-0.251944	-0.027048			0.326998	0.243418	0.540022	0.135534	-0.187166	0.106582	0.130256	-0.316428	-0.024346	-0.08071	0.138656	-0.650762	0.17472
0.012	0.080402	-0.52528	-0.537656	-0.49721	-0.2989	-0.284732	-0.264264	0.144788	0.045094	-0.232764	-0.301868	-0.300874	-0.22946			0.502866	0.631428	0.573664	0.103432	-0.24206	0.089488	0.144382	-0.49735	0.052612	-0.139188	0.163016	-0.778092	0.199318
0.014	0.136822	-0.710752	-0.243278	-0.45836	-0.307524	-0.23037	-0.218316	0.120386	-0.090622	-0.246204	-0.314524	-0.351932	-0.38997			0.58576	0.984172	0.430318	0.077686	-0.219758	0.087962	0.125132	-0.66843	0.108612	-0.147756	0.182546	-0.909944	0.195538
0.016	0.095186	-0.778372	-0.073766	-0.3808	-0.27965	-0.180516	-0.165354	0.062888	-0.224084	-0.25011	-0.34272	-0.42259	-0.445046			0.532266	1.28478	0.3997	0.105812	-0.176414	0.107212	0.13272	-0.713496	0.161252	-0.147252	0.193452	-1.02981	0.191156
0.018	0.050834	-0.776538	-0.136864	-0.311696	-0.228536	-0.098882	-0.09513	0.010416	-0.340242	-0.256004	-0.363258	-0.507444	-0.414554			0.41111	1.42029	0.512176	0.196994	-0.167398	0.127036	0.141708	-0.69027	0.19411	-0.141764	0.182238	-1.22458	0.158536
0.02	0.01477	-0.715652	-0.336896	-0.19439	-0.117908	0.015988	-0.037716	0.02394	-0.39795	-0.295092	-0.400904	-0.601734	-0.3227			0.18564	1.36368	0.679742	0.247254	-0.168826	0.169344	0.134904	-0.689584	0.217476	-0.153944	0.198674	-1.3379	0.06139
0.022	-0.072366	-0.704956	-0.618408	-0.086002	-0.056812	0.122556	0.010542	0.002296	-0.391538	-0.389522	-0.424116	-0.725578	-0.20258			-0.109872	1.16379	1.02203	0.285208	-0.185668	0.203672	0.170786	-0.619864	0.1813	-0.208754	0.208502	-1.35008	-0.118328
0.024	-0.207634	-0.736386	-0.756126	0.026572	-0.045808	0.205184	0.016282	0.039592	-0.339626	-0.539	-0.456848	-0.831446	-0.110936			-0.418558	0.9261	1.38106	0.32998	-0.219618	0.246036	0.168966	-0.493304	0.195272	-0.29029	0.24528	-1.38186	-0.293748
0.026	-0.374948	-0.713258	-0.917518	0.101472	-0.059038	0.249172	-0.043848	0.138642	-0.275366	-0.692496	-0.495894	-0.775068	-0.024304			-0.762216	0.772814	1.72715	0.3262	-0.21679	0.273056	0.158186	-0.29204	0.182462	-0.402234	0.24983	-1.24134	-0.56658
0.028	-0.502124	-0.543844	-1.05064	0.17157	-0.108738	0.2359	-0.140798	0.22883	-0.177492	-0.778302	-0.553224	-0.683312	0.065968			-1.04513	0.65142	1.94148	0.301588	-0.21273	0.287728	0.15323	-0.12012	0.214116	-0.47957	0.260932	-1.15731	-0.80206
0.03	-0.651938	-0.391132	-1.06786	0.173642	-0.167888	0.20083	-0.229306	0.336406	-0.1029	-0.810194	-0.591598	-0.41643	0.172718			-1.38389	0.507556	1.98547	0.485772	-0.269458	0.296436	0.152208	-0.085764	0.268072	-0.525098	0.262836	-1.03667	-1.07187
0.032	-0.744548	-0.32788	-0.966182	0.161364	-0.261254	0.094682	-0.29722	0.420014	-0.025214	-0.85666	-0.620032	-0.119098	0.275492			-1.65834	0.393274	1.85056	0.271208	-0.304108	0.295624	0.161644	-0.038318	0.373954	-0.55944	0.263592	-0.867314	-1.33319
0.034	-0.851676	-0.444416	-0.82362	0.0945	-0.344428	0.00371	-0.322588	0.435652	0.07679	-0.916944	-0.686854	0.117194	0.429184			-1.93278	0.366702	1.65252	0.305732	-0.352422	0.273014	0.17913	-0.026614	0.439334	-0.523432	0.296296	-0.803586	-1.54494
0.036	-0.951468	-0.63791	-0.620004	-0.028322	-0.363132	-0.022372	-0.311738	0.445466	0.132118	-0.915614	-0.789446	0.188706	0.539028			-2.18617	0.499366	1.44593	0.341782	-0.355012	0.219464	0.168868	0.006594	0.490308	-0.42798	0.319914	-0.746214	-1.62761
0.038	-0.988162	-0.807758	-0.48342	-0.145068	-0.338814	-0.027496	-0.253218	0.48265	0.184982	-0.89964	-0.853986	0.114632	0.607642			-2.3357	0.690578	1.24047	0.327166	-0.296366	0.142716	0.173558	-0.103474	0.565432	-0.339892	0.327166	-0.704942	-1.63157
0.04	-0.999796	-1.04521	-0.443632	-0.256872	-0.297514	0.004592	-0.186074	0.568064	0.216986	-0.869064	-0.904848	0.009436	0.699832			-2.28085	0.85008	1.05715	0.332528	-0.300202	0.12411	0.20356	-0.305606	0.658882	-0.305886	0.379526	-0.694092	-1.59888
0.042	-0.953596	-1.31573	-0.49427	-0.382704	-0.24563	0.045486	-0.126322	0.642684	0.271824	-0.837158	-0.890554	-0.114702	0.611422			-2.15064	0.981442	1.05948	0.379918	-0.294364	0.125608	0.258188	-0.542514	0.726502	-0.291452	0.438018	-0.780962	-1.53688
0.044	-0.90636	-1.48387	-0.500696	-0.482678	-0.138194	0.095508	-0.066332	0.645596	0.29414	-0.83069	-0.820512	-0.167538	0.371224			-2.03018	1.08262	1.22147	0.378742	-0.328944	0.146132	0.280966	-0.639772	0.76104	-0.303408	0.490322	-0.907396	-1.46502
0.046	-0.93345	-1.57506	-0.568582	-0.602322	-0.083594	0.14042	-0.009674	0.600614	0.362544	-0.855764	-0.776104	-0.250166	0.163604			-1.90113	1.12822	1.43825	0.363734	-0.359366	0.139832	0.302764	-0.741538	0.823956	-0.333312	0.564382	-1.06931	-1.49971
0.048	-0.928718	-1.43094	-0.630546	-0.625198	-0.078848	0.175112	-0.000812	0.579586	0.38241	-0.899962	-0.674086	-0.334362	0.040768			-1.70619	1.12564	1.64517	0.313292	-0.332528	0.18648	0.324254	-0.78666	0.910518	-0.365344	0.594776	-1.28149	-1.59067
0.05	-0.896896	-1.03613	-0.636958	-0.647108	-0.09744	0.190092	-0.08204	0.47761	0.445158	-0.929978	-0.580566	-0.42133	-0.027328			-1.49989	1.09929	1.92751	0.344666	-0.359898	0.234332	0.28868	-0.882504	0.973084	-0.401772	0.638134	-1.45678	-1.62404
0.052	-0.880222	-0.610316	-0.586838	-0.657048	-0.13888	0.192528	-0.197946	0.477134	0.474656	-0.999726	-0.495502	-0.467978	0.003136			-1.42988	1.05704	2.20875	0.400218	-0.38451	0.30835	0.238196	-0.909622	0.981176	-0.461832	0.690858	-1.61357	-1.6476
0.054	-0.893144	-0.34734	-0.53844	-0.653786	-0.19887	0.164556	-0.312802	0.469406	0.553308	-1.06179	-0.4627	-0.515046	0.112658			-1.55873	1.06009	2.34223	0.410592	-0.439292	0.3843	0.2016	-0.922376	1.06967	-0.485086	0.712488	-1.74902	-1.69095
0.056	-0.931784	-0.205576	-0.592942	-0.61915	-0.282366	0.114478	-0.387044	0.529032	0.575876	-1.12515	-0.492128	-0.55468	0.281526			-1.74552	1.18042	2.36796	0.47033	-0.479766	0.460908	0.17521	-0.78736	1.11863	-0.487228	0.693168	-1.87596	-1.8016
0.058	-1.0131	-0.233618	-0.785722	-0.57379	-0.359002	0.090664	-0.410186	0.607516	0.66458	-1.17358	-0.578466	-0.6104	0.396284			-2.0102	1.3518	2.31976	0.505708	-0.522214	0.54586	0.157332	-0.618898	1.17839	-0.517426	0.572614	-1.98965	-2.05981
0.06	-1.0983	-0.303198	-1.00093	-0.528836	-0.405706	0.088606	-0.39494	0.808696	0.710976	-1.23253	-0.69867	-0.62678	0.512232			-2.29649	1.47405	2.29197	0.582246	-0.515326	0.576366	0.17325	-0.516684	1.22406	-0.542794	0.481026	-2.14515	-2.28116
0.062	-1.18264	-0.491246	-1.24582	-0.446166	-0.413728	0.13468	-0.386624	1.00904	0.725816	-1.32164	-0.77021	-0.686448	0.636916			-2.63788	1.41781	2.24395	0.610148	-0.572334	0.509222	0.162078	-0.579698	1.34035	-0.603344	0.40894	-2.25109	-2.53191
0.064	-1.29539	-0.763658	-1.56332	-0.354998	-0.393862	0.242396	-0.340074	1.13058	0.778596	-1.42499	-0.788774	-0.717458	0.761922			-2.97479	1.26169	2.20917	0.644938	-0.530572	0.427322	0.214914	-0.6356	1.3866	-0.701834	0.295022	-2.38032	-2.77444
0.066	-1.402	-1.03718	-1.77884	-0.292082	-0.322462	0.328496	-0.313544	1.22275	0.702534	-1.51389	-0.793184	-0.77301	0.886018			-3.29375	1.1235	2.29428	0.611772	-0.501116	0.401016	0.263242	-0.63721	1.43843	-0.807198	0.17626	-2.49609	-3.0092
0.068	-1.47196	-1.31774	-1.87761	-0.296744	-0.250264	0.429562	-0.25403	1.30011	0.632394	-1.58533	-0.77959	-0.843542	1.01594			-3.60283	0.981974	2.43176	0.607572	-0.484512	0.391356	0.32179	-0.726236	1.43202	-0.906234	0.138768	-2.58698	-3.22573
0.07	-1.58901	-1.37064	-1.80888	-0.320754	-0.184632	0.489496	-0.192164	1.24723	0.525966	-1.65813	-0.751282	-0.889714	1.14905			-3.9191	0.957586	2.49067	0.602938	-0.46333	0.42819	0.392028	-0.699398	1.3895	-0.992908	0.14105	-2.70019	-3.34093
0.072	-1.64655	-1.27166	-1.55589	-0.361228	-0.187572	0.473004	-0.127008	1.22632	0.449834	-1.73204	-0.659414	-0.93982	1.27581			-4.16422	0.895776	2.5979	0.600894	-0.469938	0.458556	0.439362	-0.715036	1.38618	-1.04538	0.182854	-2.84444	-3.43963
0.074	-1.66284	-1.00178	-1.18597	-0.43449	-0.215684	0.432082	-0.095704	1.09138	0.41461	-1.82269	-0.633668	-1.0102	1.28857			-4.3626	0.842744	2.52414	0.63581	-0.501466	0.518882	0.462056	-0.819042	1.34408	-1.10684	0.300636	-2.99398	-3.36781
0.076	-1.6116	-0.765142	-0.933842	-0.520912	-0.2443	0.38787	-0.104818	1.04745	0.458836	-1.90492	-0.663838	-1.08692	1.21384			-4.38603	0.899234	2.51139	0.604716	-0.524748	0.601146	0.456946	-0.879844	1.32363	-1.13478	0.36547	-3.15116	-3.19535
0.078	-1.57937	-0.636454	-0.985796	-0.612556	-0.268618	0.351442	-0.108472	0.980168	0.566734	-1.92903	-0.736792	-1.20026	0.944818			-4.33985	1.11159	2.54745	0.68215	-0.576086	0.689304	0.445102	-0.973672	1.34266	-1.14416	0.401128	-3.32549	-3.02539
0.08	-1.51109	-0.575862	-1.20029	-0.695044	-0.328846	0.310912	-0.134498	0.911722	0.712152	-1.95304	-0.856604	-1.31503	0.557634			-4.16972	1.35129	2.6537	0.706622	-0.642642	0.750722	0.427322	-0.967204	1.35157	-1.15305	0.460992	-3.38391	-2.91417
0.082	-1.53042	-0.606746	-1.47095	-0.769678	-0.394394	0.288008	-0.200676	0.910756	0.855512	-1.96858	-0.996982	-1.40493	0.30646			-4.0301	1.45986	2.8202	0.720664	-0.698474	0.774872	0.37254	-0.94661	1.43795	-1.19281	0.454132	-3.3518	-2.98428
0.084	-1.6532	-0.764862	-1.74243	-0.867888	-0.452732	0.336238	-0.24934	0.851634	0.951118	-1.95041	-1.07961	-1.46391	0.280084			-3.87162	1.39335	3.09303	0.76419	-0.716534	0.728546	0.314636	-0.938532	1.47448	-1.26738	0.4781	-3.30813	-3.05108
0.086	-1.8018	-1.01811	-1.92849	-0.881006	-0.446376	0.437542	-0.250642	0.87325	1.04182	-1.89951	-1.1502	-1.44189	0.345618			-3.7676	1.23533	3.3784	0.821016	-0.712852	0.621306	0.28819	-0.817838	1.45235	-1.34546	0.51471	-3.21418	-3.02501
0.088	-1.88859	-1.29255	-2.0481	-0.885472	-0.4466	0.558502	-0.23779	0.869988	1.07678	-1.83616	-1.23231	-1.31502	0.481572			-3.80976	1.10404	3.65852	0.918736	-0.728952	0.555394	0.291354	-0.665686	1.45025	-1.36982	0.534212	-3.13005	-3.10794
0.09	-1.92916	-1.53525	-2.11729	-0.860006	-0.40096	0.65793	-0.205506	1.0774	1.10559	-1.79606	-1.31187	-1.08816	0.650664			-3.78507	1.0066	3.7672	0.98721	-0.70924	0.515396	0.327404	-0.77112	1.42922	-1.38817	0.555842	-3.06631	-3.23886
0.092	-1.8739	-1.66954	-2.033	-0.805364	-0.424102	0.737702	-0.174496	1.25961	1.2091	-1.79161	-1.40074	-0.823676	0.797552			-3.73607	0.939876	3.71769	1.01198	-0.734944	0.534254	0.355866	-0.891226	1.35873	-1.42061	0.580608	-2.92011	-3.41989
0.094	-1.848	-1.6003	-1.89622	-0.76223	-0.442036	0.73178	-0.137914	1.44843	1.27932	-1.80604	-1.45876	-0.572362	0.9506			-3.73492	0.944412	3.5817	1.03342	-0.657986	0.57386	0.403298	-1.00072	1.35106	-1.45186	0.610778	-2.7903	-3.60739
0.096	-1.82711	-1.43066	-1.66267	-0.71603	-0.479598	0.689136	-0.105602	1.55333	1.29128	-1.8758	-1.51423	-0.45283	1.09102			-3.82514	1.01175	3.40945	1.07456	-0.555856	0.647794	0.452676	-1.17795	1.35559	-1.48893	0.629034	-2.74203	-3.80734
0.098	-1.80814	-1.2242	-1.40652	-0.667702	-0.535248	0.642544	-0.1008	1.66593	1.28876	-1.98113	-1.57612	-0.502194	1.24368			-4.01779	1.16505	3.12347	1.05109	-0.513366	0.734062	0.505722	-1.3126	1.37341	-1.5378	0.653268	-2.69503	-4.09276
0.1	-1.81027	-1.10758	-1.31291	-0.62062	-0.517314	0.59192	-0.130326	1.811	1.18579	-2.09048	-1.63766	-0.617232	1.3974			-4.19675	1.42155	2.91073	1.07624	-0.461118	0.802326	0.547904	-1.42005	1.38489	-1.60072	0.65177	-2.70182	-4.37224
0.102	-1.76687	-1.08171	-1.30997	-0.561946	-0.524496	0.551278	-0.17388	1.96018	1.03491	-2.21745	-1.73891	-0.763658	1.53679			-4.47584	1.63267	2.77963	1.04114	-0.475006	0.858172	0.569464	-1.54091	1.40235	-1.67478	0.684936	-2.8145	-4.63718
0.104	-1.69858	-1.19367	-1.36815	-0.529256	-0.505876	0.54901	-0.179648	2.05766	0.89446	-2.3406	-1.76889	-0.857878	1.63551			-4.67046	1.64471	2.87288	1.01818	-0.54432	0.867384	0.592648	-1.7309	1.44059	-1.78009	0.687498	-2.99874	-4.89665
0.106	-1.62282	-1.37546	-1.44883	-0.55174	-0.506366	0.613368	-0.176736	2.07638	0.844452	-2.47283	-1.81051	-0.926142	1.63513			-4.85895	1.44129	3.09533	1.01107	-0.63525	0.800828	0.572236	-1.78924	1.46244	-1.88194	0.699034	-3.22917	-5.07115
0.108	-1.5148	-1.63232	-1.60614	-0.604702	-0.409864	0.71631	-0.141134	2.07682	0.76608	-2.59134	-1.88318	-1.01262	1.55107			-4.94283	1.25322	3.37285	1.00416	-0.74438	0.72772	0.55482	-1.87417	1.39614	-1.96403	0.713608	-3.43032	-5.0876
0.11	-1.47412	-1.90268	-1.67476	-0.625058	-0.320278	0.835184	-0.083006	1.99654	0.79793	-2.68556	-1.9543	-1.09771	1.46245			-4.99286	1.20162	3.638	0.993608	-0.810796	0.66521	0.542682	-1.87117	1.36714	-2.04001	0.72905	-3.65446	-5.09804
0.112	-1.45964	-2.18266	-1.68416	-0.696794	-0.255192	0.941052	-0.037898	1.97772	0.87073	-2.76821	-2.05516	-1.19476	1.37892			-5.03618	1.20693	3.95459	0.993818	-0.854182	0.630784	0.535892	-1.87954	1.39636	-2.06339	0.782992	-3.8541	-5.07916
0.114	-1.57661	-2.26975	-1.65031	-0.816802	-0.243222	0.99631	0.002324	1.97588	0.910406	-2.88032	-2.16398	-1.21523	1.47514			-5.04449	1.18574	4.22827	1.10225	-0.872508	0.64414	0.53676	-1.83981	1.4022	-2.09621	0.802368	-4.00859	-5.03621
0.116	-1.79659	-2.21642	-1.60978	-0.943488	-0.263088	0.976304	0.032788	1.98635	0.981316	-2.94687	-2.26213	-1.29347	1.66334			-5.05201	1.20945	4.38059	1.13743	-0.85792	0.714518	0.548842	-1.72738	1.38327	-2.09989	0.850976	-4.19378	-4.9414
0.118	-2.07381	-1.93581	-1.63523	-1.03454	-0.354732	0.901642	0.017136	1.9376	1.07047	-2.97324	-2.33439	-1.35227	1.82112			-5.06033	1.22643	4.47881	1.16344	-0.87059	0.78764	0.559538	-1.54322	1.41802	-2.09216	0.84833	-4.37629	-4.85958
0.12	-2.23814	-1.6351	-1.77096	-1.07919	-0.428022	0.804958	-0.048244	1.94197	1.1158	-2.98262	-2.38645	-1.38807	1.92531			-5.0472	1.38069	4.40744	1.17272	-0.804804	0.832762	0.56812	-1.39495	1.44124	-2.05878	0.814814	-4.49595	-4.80414
0.122	-2.33345	-1.46947	-2.02409	-1.11013	-0.54439	0.731444	-0.139076	2.01205	1.18964	-2.95802	-2.38862	-1.44593	1.99942			-5.16769	1.57473	4.23083	1.16255	-0.79506	0.858648	0.569156	-1.28093	1.47167	-2.07731	0.781326	-4.6506	-4.72858
0.124	-2.41184	-1.45856	-2.32226	-1.09536	-0.609532	0.732424	-0.230888	2.10218	1.24366	-2.88112	-2.37887	-1.47427	1.92077			-5.3039	1.72715	4.18803	1.20737	-0.780248	0.841946	0.55405	-1.30364	1.50655	-2.19043	0.729918	-4.80098	-4.69391
0.126	-2.43482	-1.53483	-2.52914	-1.05225	-0.6503	0.78197	-0.28441	2.19804	1.3225	-2.82139	-2.37665	-1.50167	1.82004			-5.30635	1.72418	4.1963	1.24447	-0.783118	0.793954	0.568204	-1.31671	1.54599	-2.32828	0.642432	-5.02529	-4.73026
0.128	-2.3058	-1.65393	-2.61131	-0.985852	-0.607082	0.879424	-0.326074	2.20798	1.36674	-2.75702	-2.41413	-1.44764	1.7645			-5.20374	1.65899	4.32698	1.23549	-0.757582	0.752374	0.59955	-1.26869	1.57534	-2.40866	0.57904	-5.24229	-4.84973
0.13	-2.05457	-1.77072	-2.58076	-0.894628	-0.529578	1.00318	-0.314272	2.17671	1.42017	-2.67369	-2.35519	-1.37654	1.72326			-5.08666	1.62021	4.41981	1.24344	-0.81151	0.702688	0.5999	-1.21295	1.62651	-2.45491	0.531468	-5.34768	-5.11403
0.132	-1.85317	-1.90495	-2.41571	-0.795564	-0.424144	1.12949	-0.269066	2.18085	1.50966	-2.63241	-2.20275	-1.29527	1.65249			-5.02362	1.70384	4.55841	1.20166	-0.850164	0.669816	0.591276	-1.17947	1.6703	-2.49567	0.55188	-5.35669	-5.35207
0.134	-1.70533	-2.1034	-2.09062	-0.70623	-0.335356	1.22585	-0.212688	2.23926	1.54433	-2.62384	-2.08397	-1.18254	1.50727			-5.10373	1.67497	4.67789	1.18618	-0.92092	0.649782	0.618212	-1.19773	1.72763	-2.51236	0.671118	-5.29633	-5.47817
0.136	-1.61622	-2.33045	-1.83851	-0.620704	-0.273728	1.28219	-0.156296	2.17927	1.64548	-2.73293	-1.99035	-1.24011	1.43745			-5.14188	1.59355	4.80313	1.13756	-0.979524	0.662144	0.653184	-1.31495	1.77335	-2.58958	0.794934	-5.26231	-5.54939
0.138	-1.67469	-2.58693	-1.88686	-0.576744	-0.267064	1.25475	-0.088396	2.15195	1.70937	-2.87056	-1.91535	-1.34242	1.3854			-5.21545	1.5028	4.8974	1.08804	-0.978474	0.724682	0.695016	-1.44479	1.82792	-2.7246	0.927416	-5.18906	-5.64243
0.14	-1.75577	-2.79373	-2.13275	-0.547078	-0.28406	1.19974	-0.038416	2.08776	1.7612	-3.00093	-1.86018	-1.53726	1.4484			-5.31439	1.51733	5.02922	1.04616	-0.975842	0.81291	0.69944	-1.51197	1.89536	-2.80195	0.994154	-5.14556	-5.71022
0.142	-1.87076	-2.90779	-2.42369	-0.543718	-0.375172	1.14372	-0.026348	2.04175	1.85689	-3.12417	-1.83333	-1.78528	1.61505			-5.42289	1.65227	5.20926	1.03295	-0.986104	0.883792	0.693042	-1.61353	1.94858	-2.78905	0.950642	-5.189	-5.77287
0.144	-2.03535	-2.95754	-2.70614	-0.561288	-0.492366	1.0967	-0.096726	2.0403	1.91824	-3.19998	-1.90168	-1.97142	1.83483			-5.61932	1.7019	5.50101	1.02827	-1.01283	0.921382	0.667814	-1.69114	1.98934	-2.7342	0.884002	-5.25622	-5.89086
0.146	-2.17473	-2.83996	-2.89902	-0.552482	-0.6104	1.0939	-0.212604	2.04788	2.01881	-3.2551	-1.98393	-2.08153	2.0151			-5.74812	1.66723	5.82334	1.00394	-1.01669	0.928046	0.639128	-1.70624	2.06625	-2.68726	0.83853	-5.32848	-5.88358
0.148	-2.28388	-2.52581	-3.00619	-0.598836	-0.667352	1.14031	-0.29554	2.02867	2.09356	-3.3013	-2.07868	-2.13497	2.1363			-5.86337	1.68151	6.04181	1.0004	-0.960848	0.910574	0.631568	-1.59942	2.08054	-2.66742	0.861644	-5.36602	-5.84499
0.15	-2.36197	-2.1002	-3.00842	-0.598108	-0.657524	1.20107	-0.359002	2.00805	2.16077	-3.26554	-2.16453	-2.13759	2.18477			-5.89179	1.79243	6.1139	1.00332	-0.91847	0.866768	0.633808	-1.45319	2.14071	-2.6732	0.873782	-5.38342	-5.8267
0.152	-2.28721	-1.84143	-2.89953	-0.636468	-0.642572	1.30687	-0.412006	2.01664	2.23448	-3.26071	-2.27226	-2.06027	2.13923			-5.81643	2.03624	6.06612	0.95732	-0.9373	0.801262	0.626976	-1.30382	2.20252	-2.77227	0.882392	-5.39771	-5.85311
0.154	-2.07529	-1.75773	-2.6346	-0.626836	-0.544922	1.4212	-0.413028	2.11091	2.32779	-3.30022	-2.34406	-1.89391	1.98394			-5.65316	2.29569	6.03148	0.937902	-0.968772	0.739116	0.611604	-1.24404	2.26107	-2.92142	0.938406	-5.34582	-5.96758
0.156	-1.82797	-1.87295	-2.33631	-0.611954	-0.447412	1.50927	-0.379652	2.26379	2.41332	-3.36364	-2.41399	-1.666	1.70904			-5.44802	2.3949	5.90199	0.928718	-1.01924	0.693616	0.619122	-1.30945	2.30542	-3.06804	0.965496	-5.23186	-6.11547
0.158	-1.65957	-2.14192	-2.20956	-0.654192	-0.361172	1.56195	-0.321132	2.41835	2.47967	-3.42248	-2.48661	-1.39322	1.55352			-5.38226	2.29684	5.9291	0.893872	-1.06964	0.705796	0.636496	-1.43007	2.38603	-3.1814	0.965958	-5.07903	-6.26451
0.16	-1.64549	-2.37661	-2.35977	-0.686476	-0.32438	1.56926	-0.259	2.52514	2.53469	-3.4733	-2.55528	-1.19137	1.44047			-5.41453	2.15337	6.00597	0.8918	-1.12459	0.75495	0.678006	-1.5133	2.44525	-3.30301	0.998802	-4.8715	-6.31061
0.162	-1.73282	-2.53215	-2.59172	-0.699636	-0.3395	1.49815	-0.18746	2.64876	2.61597	-3.52801	-2.616	-1.06109	1.35079			-5.45282	1.98122	6.18594	0.888692	-1.1242	0.792134	0.728532	-1.59698	2.54351	-3.41043	1.04152	-4.65853	-6.38599
0.164	-1.85006	-2.69003	-2.86597	-0.728448	-0.394954	1.397	-0.133574	2.78593	2.57918	-3.60777	-2.65807	-1.05549	1.38404			-5.49462	1.80772	6.58568	0.91336	-1.12244	0.838334	0.752822	-1.69564	2.61444	-3.56258	1.09193	-4.54782	-6.43797
0.166	-1.95112	-2.69375	-3.05134	-0.715596	-0.505722	1.3316	-0.086268	2.90835	2.52354	-3.68722	-2.72413	-1.1095	1.46954			-5.59919	1.70575	7.05362	0.900676	-1.1142	0.861994	0.774592	-1.84866	2.63187	-3.70572	1.13781	-4.55781	-6.45659
0.168	-2.05839	-2.56232	-3.24131	-0.73745	-0.612094	1.29853	-0.070392	3.0373	2.39908	-3.74377	-2.74385	-1.19052	1.69674			-5.79153	1.69572	7.36438	0.866894	-1.10935	0.815346	0.787808	-1.94274	2.62192	-3.75334	1.134	-4.58177	-6.54717
0.17	-2.17202	-2.32037	-3.36661	-0.778162	-0.690956	1.31286	-0.15771	3.17696	2.32229	-3.78231	-2.82146	-1.28615	1.93498			-5.96166	1.8306	7.50231	0.835702	-1.06492	0.778218	0.763196	-2.05787	2.64132	-3.74592	1.1655	-4.74341	-6.63149
0.172	-2.29958	-2.02964	-3.40148	-0.871136	-0.71351	1.38058	-0.258804	3.27865	2.22817	-3.74389	-2.8712	-1.34341	2.10332			-6.15531	2.11981	7.45223	0.846818	-1.0291	0.769902	0.744688	-2.1539	2.60443	-3.6842	1.19529	-4.86571	-6.65403
0.174	-2.39624	-1.79367	-3.37326	-0.94101	-0.679448	1.44997	-0.343476	3.30555	2.18485	-3.66787	-2.93076	-1.39495	2.26624			-6.33118	2.39592	7.34556	0.86142	-1.03828	0.778722	0.737926	-2.17575	2.54535	-3.62093	1.22357	-5.00293	-6.62773
0.176	-2.46317	-1.75148	-3.28311	-1.02028	-0.611926	1.5692	-0.377132	3.27765	2.2433	-3.54386	-2.9518	-1.46058	2.32681			-6.25258	2.54037	7.15565	0.859306	-1.07936	0.76356	0.740684	-2.20804	2.48416	-3.58551	1.25651	-5.11606	-6.60362
0.178	-2.46243	-1.88657	-3.21563	-1.06436	-0.517454	1.68358	-0.373506	3.21122	2.37159	-3.42664	-2.97972	-1.51168	2.25502			-6.22077	2.53057	6.97355	0.855834	-1.13728	0.756154	0.742896	-2.2713	2.39208	-3.63307	1.26769	-5.2232	-6.63579
0.18	-2.40447	-2.11112	-3.18832	-1.11542	-0.414848	1.80447	-0.352702	3.15206	2.53716	-3.34901	-3.04391	-1.57548	2.01228			-6.14677	2.44511	6.81398	0.865284	-1.17299	0.754194	0.746872	-2.23593	2.37222	-3.67006	1.26738	-5.37065	-6.69078
0.182	-2.26365	-2.31645	-3.22209	-1.19244	-0.349804	1.88055	-0.315588	3.15627	2.71578	-3.3377	-3.08696	-1.63723	1.74094			-6.0962	2.31076	6.66133	0.90111	-1.17545	0.732914	0.750988	-2.14613	2.29606	-3.70367	1.28131	-5.51982	-6.73884
0.184	-2.10678	-2.41842	-3.31353	-1.24887	-0.347494	1.93813	-0.291536	3.04198	2.75769	-3.39671	-3.17206	-1.74923	1.52085			-6.05804	2.18033	6.70383	0.936824	-1.21369	0.725522	0.751268	-1.92763	2.23779	-3.73811	1.2999	-5.62062	-6.78646
0.186	-2.01037	-2.47824	-3.4293	-1.28821	-0.406644	1.9196	-0.221102	3.12956	2.81019	-3.50195	-3.25399	-1.83495	1.39924			-5.98437	2.00347	6.88269	0.961646	-1.21038	0.756854	0.794836	-1.7995	2.13392	-3.79813	1.33714	-5.78564	-6.86237
0.188	-2.04198	-2.46558	-3.5467	-1.32853	-0.52773	1.8493	-0.182952	3.17524	2.88411	-3.62726	-3.33028	-1.94754	1.37613			-5.89016	1.83639	7.07802	0.93219	-1.19808	0.835492	0.833266	-1.67891	2.08267	-3.9031	1.35093	-5.90775	-6.92966
0.19	-2.10778	-2.32051	-3.63623	-1.32706	-0.61166	1.78716	-0.125678	3.25984	2.93798	-3.7388	-3.42229	-2.01039	1.42842			-5.9067	1.7722	7.24818	0.88725	-1.19175	0.88522	0.868616	-1.62513	2.02644	-3.97305	1.39493	-6.07253	-6.93759
0.192	-2.22295	-2.19194	-3.62853	-1.3117	-0.70609	1.75063	-0.075866	3.31764	2.94468	-3.83394	-3.4894	-2.08946	1.54727			-6.04372	1.93029	7.40041	0.913388	-1.20175	0.906276	0.880208	-1.51218	2.06776	-3.96614	1.44599	-6.17876	-6.94646
0.194	-2.3021	-2.07175	-3.46487	-1.28339	-0.77343	1.7368	-0.079282	3.29431	2.86852	-3.89777	-3.45677	-2.16884	1.71423			-6.20862	2.20646	7.4515	0.950278	-1.17722	0.86716	0.888566	-1.46796	2.13688	-3.92046	1.53045	-6.2881	-7.05375
0.196	-2.41168	-1.9712	-3.30611	-1.28079	-0.792806	1.75094	-0.159978	3.33339	2.75902	-3.94825	-3.40319	-2.25095	1.83693			-6.36804	2.45486	7.4128	0.976892	-1.13894	0.805154	0.868294	-1.43889	2.21452	-3.87947	1.57504	-6.37489	-7.29268
0.198	-2.49607	-1.95275	-3.26094	-1.30239	-0.756406	1.80113	-0.266966	3.32098	2.6308	-4.00453	-3.36637	-2.29712	1.95607			-6.55173	2.61317	7.36936	1.00296	-1.10771	0.764414	0.84945	-1.4919	2.30838	-3.85118	1.59289	-6.45463	-7.58185
0.2	-2.58398	-2.0061	-3.27785	-1.29629	-0.685034	1.89486	-0.345814	3.3034	2.58734	-3.97298	-3.29553	-2.37819	2.07593			-6.71857	2.66113	7.27912	1.05476	-1.08283	0.766682	0.85344	-1.58021	2.38318	-3.85633	1.5997	-6.57873	-7.90735
0.202	-2.64566	-2.04536	-3.35265	-1.25541	-0.629076	2.00297	-0.401548	3.32884	2.52309	-3.91927	-3.22874	-2.4366	2.2604			-6.88897	2.62996	7.09229	1.14559	-1.12794	0.783986	0.854168	-1.67192	2.39938	-3.92126	1.58859	-6.67545	-8.19444
0.204	-2.58699	-2.05535	-3.50932	-1.16816	-0.58198	2.10741	-0.400526	3.32237	2.51324	-3.83946	-3.17444	-2.49935	2.45881			-7.04529	2.44313	6.82581	1.2306	-1.16266	0.792274	0.86289	-1.78672	2.36302	-4.01696	1.51033	-6.74821	-8.36283
0.206	-2.4814	-2.0533	-3.63023	-1.07171	-0.566902	2.21949	-0.36134	3.26567	2.5452	-3.78581	-3.18438	-2.52224	2.61219			-7.17532	2.1246	6.50973	1.29674	-1.19099	0.784966	0.854042	-1.91236	2.32942	-4.13423	1.40666	-6.81293	-8.43336
0.208	-2.33276	-2.0735	-3.73926	-0.990318	-0.5705	2.32781	-0.332192	3.28773	2.62693	-3.72042	-3.25779	-2.60172	2.61545			-7.25731	1.79094	6.37725	1.29233	-1.19312	0.75523	0.86464	-2.00721	2.33293	-4.198	1.36081	-6.94305	-8.39604
0.21	-2.1854	-1.99536	-3.80591	-0.916804	-0.592214	2.36734	-0.289086	3.25387	2.72735	-3.67023	-3.33166	-2.67249	2.50985			-7.348	1.48289	6.3264	1.24753	-1.16403	0.763098	0.893158	-2.05864	2.30856	-4.24878	1.36546	-7.03879	-8.25997
0.212	-2.06087	-1.87113	-3.77069	-0.826938	-0.654276	2.38787	-0.232372	3.22323	2.851	-3.69677	-3.38516	-2.74067	2.27471			-7.36889	1.29017	6.31718	1.23325	-1.18308	0.768936	0.928648	-1.98941	2.32298	-4.28287	1.37546	-7.18301	-8.09193
0.214	-1.94821	-1.79857	-3.63471	-0.773542	-0.681198	2.3357	-0.159502	3.14826	2.95925	-3.80598	-3.43762	-2.79737	1.95539			-7.3719	1.22139	6.26521	1.21118	-1.19862	0.793772	0.971642	-1.85231	2.31928	-4.37835	1.37246	-7.34538	-8.01192
0.216	-1.9004	-1.83904	-3.56037	-0.72898	-0.749882	2.24815	-0.104216	3.10353	3.04002	-3.93105	-3.46881	-2.83427	1.67475			-7.3452	1.21513	6.34477	1.18958	-1.26773	0.841316	1.0002	-1.6654	2.3508	-4.4135	1.37574	-7.42739	-7.96342
0.218	-1.90631	-1.90036	-3.5401	-0.70021	-0.794472	2.17795	-0.052724	3.17334	3.16105	-4.03502	-3.45645	-2.90128	1.50899			-7.28392	1.20887	6.51052	1.1738	-1.30354	0.879858	1.01262	-1.56349	2.37846	-4.38199	1.37351	-7.59143	-7.95355
0.22	-2.05513	-2.01088	-3.57916	-0.765856	-0.82915	2.12673	-0.058856	3.29001	3.26243	-4.11114	-3.49744	-2.91599	1.52244			-7.16794	1.30239	6.54531	1.1719	-1.31313	0.845628	1.01573	-1.59104	2.39644	-4.33866	1.37276	-7.71674	-7.94101
0.222	-2.25309	-2.11077	-3.68687	-0.875224	-0.828618	2.10269	-0.117348	3.46228	3.35878	-4.15234	-3.54243	-2.84542	1.6217			-7.10384	1.46238	6.65434	1.14229	-1.32821	0.799736	1.00856	-1.66806	2.41461	-4.29471	1.37234	-7.78781	-8.01903
0.224	-2.47566	-2.17413	-3.83697	-0.958188	-0.831152	2.10146	-0.232414	3.65007	3.46665	-4.1498	-3.59365	-2.78473	1.72358			-7.08761	1.64398	6.7787	1.11153	-1.29879	0.734636	0.980896	-1.71973	2.43456	-4.31623	1.38324	-7.80284	-8.11341
0.226	-2.63497	-2.29226	-4.03369	-1.03218	-0.818048	2.12162	-0.330022	3.83468	3.54266	-4.13511	-3.58679	-2.72209	1.80975			-7.1569	1.88044	6.95156	1.1144	-1.29584	0.686798	0.976612	-1.82927	2.45729	-4.39221	1.38484	-7.75614	-8.29332
0.228	-2.79184	-2.38888	-4.2006	-1.09033	-0.820722	2.17265	-0.394898	3.97751	3.61962	-4.19511	-3.60816	-2.61491	1.91292			-7.19207	2.05192	7.12547	1.06477	-1.2648	0.637056	0.958412	-1.89596	2.49995	-4.57184	1.40661	-7.58719	-8.46276
0.23	-2.8357	-2.48569	-4.34325	-1.15332	-0.816242	2.21819	-0.395486	4.08495	3.73598	-4.26719	-3.64651	-2.55165	2.00929			-7.24352	2.12293	7.26627	1.03867	-1.20786	0.632632	0.958398	-1.93704	2.5193	-4.76111	1.40836	-7.38263	-8.6794
0.232	-2.72478	-2.66052	-4.34273	-1.22325	-0.771652	2.28952	-0.373576	4.22885	3.8367	-4.32312	-3.68477	-2.6234	2.14439			-7.22652	2.17109	7.31536	1.02813	-1.13897	0.634648	0.96978	-2.01411	2.54118	-4.91627	1.37444	-7.22205	-8.87485
0.234	-2.60277	-2.86098	-4.23045	-1.31442	-0.796404	2.33359	-0.324562	4.34263	3.89343	-4.33497	-3.71431	-2.73167	2.27998			-7.33991	2.31417	7.40166	1.01445	-1.12139	0.649726	0.995246	-2.09493	2.57204	-5.06664	1.36513	-6.98319	-9.04862
0.236	-2.40964	-3.01566	-3.92503	-1.40351	-0.844956	2.39504	-0.295988	4.44389	3.99056	-4.29538	-3.71993	-2.79724	2.45057			-7.43347	2.33342	7.40957	1.03963	-1.14583	0.696766	1.01416	-2.12593	2.5964	-5.13426	1.31456	-6.94168	-9.37892
0.238	-2.28249	-3.00607	-3.60132	-1.44458	-0.821142	2.46663	-0.2597	4.48094	4.09163	-4.23625	-3.74538	-2.83076	2.61318			-7.51782	2.28613	7.42542	1.06179	-1.14279	0.770056	1.05932	-2.24966	2.61318	-5.18571	1.25658	-6.90788	-9.71146
0.24	-2.20584	-2.8832	-3.46559	-1.65437	-0.840532	2.53058	-0.205212	4.50066	4.1795	-4.18439	-3.78361	-2.82304	2.74561			-7.52086	2.15335	7.49713	0.967246	-1.18936	0.839454	1.09362	-2.27744	2.66227	-5.16831	1.17452	-6.91348	-9.99576
0.242	-2.17987	-2.66556	-3.61378	-1.70261	-0.812336	2.5466	-0.13846	4.51268	4.218	-4.20787	-3.77758	-2.73034	2.77862			-7.4765	2.10881	7.63045	0.96194	-1.25164	0.895076	1.13868	-2.36663	2.68528	-5.09684	1.09673	-6.9158	-10.2456
0.244	-2.18555	-2.42221	-3.86613	-1.73184	-0.818594	2.55276	-0.084028	4.46459	4.28936	-4.29968	-3.75127	-2.60466	2.71151			-7.45731	2.16828	7.7653	0.992278	-1.38358	0.926632	1.17265	-2.40402	2.70042	-5.04225	1.01237	-6.89541	-10.3265
0.246	-2.31182	-2.31606	-4.17504	-1.79459	-0.763574	2.53239	-0.052052	4.4088	4.33789	-4.40301	-3.68003	-2.426	2.67831			-7.51995	2.27543	7.75803	1.08905	-1.48107	0.846944	1.18598	-2.40835	2.75183	-5.01523	0.976794	-6.88671	-10.3178
0.248	-2.51552	-2.32358	-4.48538	-1.64249	-0.668122	2.54349	-0.06937	4.41818	4.35533	-4.46267	-3.57288	-2.35035	2.65404			-7.61687	2.36788	7.84678	1.29205	-1.53357	0.697578	1.17125	-2.4199	2.81506	-5.00157	0.966308	-6.88758	-10.2813
0.25	-2.72672	-2.38983	-4.55721	-1.69086	-0.629244	2.58709	-0.108934	4.34267	4.30095	-4.44797	-3.47549	-2.35456	2.71709			-7.70672	2.31438	7.92123	1.40097	-1.5638	0.597044	1.15349	-2.34066	2.85975	-5.01992	1.02568	-7.02773	-10.1346
0.252	-2.91549	-2.45664	-4.54391	-1.69763	-0.60214	2.63889	-0.131558	4.28926	4.22888	-4.40825	-3.41559	-2.41153	2.84133			-7.79279	2.19825	7.99152	1.47176	-1.59005	0.513898	1.14031	-2.18225	2.89752	-5.08971	1.15877	-7.16125	-9.9639
0.254	-3.077	-2.47983	-4.40189	-1.70057	-0.652428	2.69665	-0.191716	4.26595	4.17483	-4.43517	-3.31113	-2.49756	2.99265			-7.89558	2.25533	8.01227	1.5875	-1.56356	0.482902	1.12118	-2.00211	2.93423	-5.25693	1.29193	-7.29007	-9.81127
0.256	-3.06239	-2.50953	-4.09511	-1.64976	-0.735882	2.70957	-0.266084	4.2835	4.06956	-4.45879	-3.22407	-2.55394	3.06502			-7.82667	2.46065	7.86086	1.69338	-1.55294	0.516866	1.0753	-1.85553	2.94595	-5.41719	1.32304	-7.47081	-9.82607
0.258	-2.97193	-2.63472	-3.76405	-1.57056	-0.857206	2.70444	-0.28749	4.33308	4.0042	-4.50134	-3.20639	-2.63592	3.03587			-7.80312	2.71751	7.71565	1.73876	-1.52412	0.599592	1.05246	-1.80179	2.9042	-5.57439	1.28198	-7.62665	-9.75852
0.26	-2.76223	-2.81996	-3.53959	-1.49332	-0.926618	2.73603	-0.27167	4.35148	4.02065	-4.54286	-3.22946	-2.75596	2.93164			-7.76927	3.00234	7.52675	1.74917	-1.48156	0.683102	1.05773	-1.73291	2.83965	-5.73539	1.26934	-7.81932	-9.73277
0.262	-2.59591	-2.97207	-3.47438	-1.39035	-1.00062	2.75223	-0.230118	4.34771	4.09286	-4.58657	-3.269	-2.85057	2.82093			-7.74143	3.20895	7.45014	1.70036	-1.49493	0.774256	1.10086	-1.66089	2.73337	-5.87534	1.24229	-8.00212	-9.78978
0.264	-2.5405	-3.18562	-3.54224	-1.33869	-1.0362	2.78005	-0.185948	4.30207	4.19892	-4.62039	-3.32634	-2.93104	2.69818			-7.6956	3.38345	7.46007	1.66951	-1.51192	0.847	1.15034	-1.62491	2.62625	-6.03996	1.22916	-8.1558	-9.93339
0.266	-2.5564	-3.35434	-3.67048	-1.31316	-1.02554	2.76942	-0.120162	4.3786	4.31936	-4.66462	-3.42675	-3.00594	2.52414			-7.61548	3.53048	7.5013	1.59855	-1.57745	0.863772	1.20529	-1.6674	2.50368	-6.21873	1.24516	-8.27448	-10.1404
0.268	-2.62405	-3.61329	-3.83754	-1.33045	-0.979328	2.76206	-0.082138	4.47489	4.40229	-4.67916	-3.48384	-3.07888	2.36811			-7.47275	3.61176	7.74938	1.5394	-1.67007	0.769552	1.26567	-1.80914	2.44538	-6.24588	1.23396	-8.41149	-10.3256
0.27	-2.7104	-3.74671	-3.93106	-1.31585	-0.947814	2.79156	-0.099624	4.51149	4.48836	-4.65304	-3.52113	-3.1309	2.26418			-7.33376	3.56047	8.11324	1.50144	-1.74783	0.63252	1.30462	-1.86372	2.38279	-6.14104	1.22429	-8.55411	-10.4767
0.272	-2.79716	-3.75546	-4.10946	-1.28715	-0.881944	2.84178	-0.132006	4.59092	4.49532	-4.61639	-3.57144	-3.20209	2.19083			-7.3435	3.47259	8.52186	1.44866	-1.79862	0.511056	1.35278	-1.98324	2.36407	-5.97821	1.24498	-8.7381	-10.5646
0.274	-2.91463	-3.63548	-4.23843	-1.29865	-0.847966	2.90094	-0.160146	4.62846	4.51146	-4.53481	-3.66699	-3.26901	2.17111			-7.45882	3.51259	8.86257	1.4384	-1.83982	0.424564	1.374	-2.11569	2.35943	-5.85382	1.23313	-8.89988	-10.647
0.276	-2.94767	-3.34919	-4.36975	-1.36878	-0.85974	2.96251	-0.170576	4.62203	4.5201	-4.41577	-3.71764	-3.31559	2.30815			-7.57502	3.5714	9.12995	1.3726	-1.85657	0.392714	1.37022	-2.17353	2.35063	-5.75113	1.24254	-9.05936	-10.6355
0.278	-3.03477	-3.00562	-4.55246	-1.4628	-0.913416	2.96684	-0.185178	4.65724	4.47738	-4.35441	-3.81237	-3.31108	2.51517			-7.77364	3.49885	9.30996	1.36413	-1.81213	0.455896	1.34831	-2.28122	2.37794	-5.72477	1.27859	-9.20193	-10.5861
0.28	-3.12586	-2.80672	-4.5872	-1.51767	-0.998284	2.95674	-0.1701	4.63309	4.42852	-4.38413	-3.85974	-3.26339	2.7505			-7.89975	3.49941	9.32728	1.35184	-1.7362	0.553658	1.29702	-2.32712	2.39579	-5.81085	1.28919	-9.28183	-10.4903
0.282	-3.19469	-2.75954	-4.53435	-1.56393	-1.07199	2.94155	-0.1358	4.59123	4.35396	-4.42795	-3.93147	-3.13176	2.91364			-8.06546	3.54036	9.31102	1.27103	-1.69324	0.654654	1.24949	-2.32483	2.46037	-5.94058	1.28268	-9.29033	-10.4767
0.284	-3.25633	-2.69709	-4.41178	-1.64938	-1.15472	2.93446	-0.093968	4.58994	4.35943	-4.46932	-4.01264	-3.03401	2.9681			-8.19326	3.49565	9.19129	1.21573	-1.65943	0.726642	1.24701	-2.28221	2.46929	-6.06441	1.28752	-9.25428	-10.4638
0.286	-3.24159	-2.69192	-4.17642	-1.70927	-1.18187	2.93644	-0.075936	4.64818	4.28786	-4.50664	-4.08026	-3.11325	2.8792			-8.34714	3.45794	9.02789	1.25649	-1.67499	0.748972	1.249	-2.09691	2.50372	-6.21688	1.28597	-9.14411	-10.4241
0.288	-3.19953	-2.80305	-3.97971	-1.81516	-1.13378	2.94487	-0.13412	4.72391	4.2629	-4.56133	-4.14498	-3.25434	2.7298			-8.53405	3.38234	8.80914	1.43608	-1.71333	0.705544	1.25675	-1.94475	2.42917	-6.37116	1.3109	-9.07756	-10.4285
0.29	-3.12446	-2.94298	-3.9312	-1.90415	-1.06894	2.93209	-0.162288	4.87187	4.28064	-4.61583	-4.21809	-3.47582	2.58483			-8.65441	3.25851	8.65953	1.59615	-1.77586	0.557382	1.27392	-1.8737	2.37217	-6.54937	1.3397	-9.07042	-10.4902
0.292	-3.06482	-3.10407	-3.96403	-1.96097	-1.01014	2.94825	-0.223916	5.0387	4.245	-4.69035	-4.28553	-3.68143	2.49612			-8.72414	3.13851	8.60601	1.79189	-1.83495	0.409556	1.30028	-1.82591	2.32988	-6.71212	1.31261	-9.21509	-10.7049
0.294	-3.00756	-3.17325	-4.14126	-2.02154	-0.912856	2.97254	-0.301322	5.1168	4.25652	-4.76245	-4.35225	-3.8996	2.40311			-8.77941	3.01076	8.66691	1.94645	-1.88273	0.290878	1.33276	-1.82098	2.24581	-6.77457	1.29601	-9.34973	-11.0012
0.296	-2.96376	-3.25143	-4.29461	-2.02111	-0.89411	3.0044	-0.36589	5.19609	4.29685	-4.81155	-4.44073	-4.07186	2.29823			-8.81712	2.99254	8.85535	2.10605	-1.94573	0.232554	1.36174	-1.77115	2.16992	-6.7723	1.29006	-9.4149	-11.2614
0.298	-2.90514	-3.19705	-4.36716	-2.00012	-0.912408	3.02091	-0.405944	5.30418	4.25583	-4.85516	-4.53809	-4.18167	2.20669			-8.74163	3.00278	9.13839	2.27538	-1.92044	0.265048	1.39527	-1.77029	2.15032	-6.76234	1.3007	-9.46044	-11.2894
0.3	-2.91179	-3.08622	-4.47042	-2.01118	-1.01219	3.01497	-0.400862	5.34211	4.28007	-4.83741	-4.62384	-4.19779	2.1072			-8.68083	2.98984	9.43125	2.41245	-1.89042	0.345548	1.39996	-1.75693	2.12852	-6.71649	1.31975	-9.49003	-11.2948
0.302	-3.07714	-2.96883	-4.5331	-2.03136	-1.14369	2.99844	-0.358162	5.17061	4.2894	-4.7124	-4.69434	-4.10281	2.11872			-8.62417	3.0339	9.70516	2.53679	-1.84883	0.449834	1.37316	-1.80054	2.08065	-6.67521	1.33666	-9.45917	-11.3331
0.304	-3.33344	-2.88135	-4.5283	-2.00892	-1.2238	3.01155	-0.276234	5.0577	4.2772	-4.57226	-4.75388	-3.91803	2.256			-8.596	3.0897	9.91439	2.63246	-1.82853	0.555254	1.39474	-1.78294	2.0622	-6.65616	1.35181	-9.36947	-11.2604
0.306	-3.57196	-2.73552	-4.49984	-1.97242	-1.27561	3.0127	-0.227682	4.97105	4.26462	-4.50153	-4.83311	-3.69198	2.46673			-8.60402	3.22309	10.1419	2.69174	-1.76788	0.61376	1.39688	-1.77381	2.04701	-6.68409	1.32905	-9.2744	-11.0361
0.308	-3.7625	-2.67547	-4.50314	-1.96428	-1.2537	2.99779	-0.185794	4.89675	4.29099	-4.50857	-4.89184	-3.47969	2.61971			-8.63754	3.367	10.2745	2.71541	-1.80386	0.59304	1.38709	-1.87954	2.01817	-6.74187	1.37057	-9.20779	-10.9435
0.31	-3.88935	-2.76401	-4.66339	-1.98535	-1.21303	2.99362	-0.111832	4.87175	4.30098	-4.59088	-4.96518	-3.31106	2.62087			-8.67231	3.42747	10.2841	2.74051	-1.85013	0.483322	1.40361	-2.00318	2.01905	-6.85264	1.36892	-9.06335	-10.8784
0.312	-3.93652	-2.96479	-4.84929	-1.99347	-1.16199	3.00122	-0.088522	4.87505	4.35222	-4.65721	-5.02032	-3.28776	2.52895			-8.65763	3.40147	10.2749	2.7126	-1.93572	0.332612	1.40543	-2.11266	2.00133	-7.03853	1.36501	-8.85247	-10.9042
0.314	-3.80617	-3.18604	-5.01698	-2.07427	-1.07828	3.03842	-0.11998	4.84582	4.38325	-4.71647	-5.12002	-3.27782	2.42691			-8.67303	3.38107	10.2015	2.68005	-2.0131	0.198534	1.41403	-2.15625	2.03161	-7.25364	1.39201	-8.7869	-10.9777
0.316	-3.65512	-3.28973	-5.3173	-2.12558	-0.986496	3.08034	-0.241108	4.79174	4.41328	-4.78232	-5.21101	-3.20089	2.35595			-8.74535	3.36524	10.1524	2.65556	-2.06931	0.114212	1.39503	-2.12965	2.0782	-7.43131	1.38319	-8.76609	-11.1505
0.318	-3.49989	-3.28608	-5.51705	-2.19457	-0.955878	3.09611	-0.366268	4.79878	4.47124	-4.86388	-5.33704	-3.15062	2.3603			-8.84478	3.30015	10.2181	2.63075	-2.12663	0.117642	1.37645	-2.05863	2.16742	-7.51114	1.42006	-8.759	-11.4478
0.32	-3.41625	-3.20915	-5.60109	-2.2491	-0.953848	3.09421	-0.456344	4.89033	4.4905	-4.93181	-5.4671	-3.16998	2.37009			-8.9082	3.14454	10.3275	2.60595	-2.15779	0.211946	1.3764	-2.03566	2.23356	-7.5523	1.43391	-8.7726	-11.7231
0.322	-3.32861	-3.08459	-5.58653	-2.32	-1.00265	3.0826	-0.511126	5.0428	4.52602	-4.96489	-5.51629	-3.25601	2.38798			-8.94184	2.86852	10.4323	2.56414	-2.15134	0.313488	1.37921	-2.05192	2.36032	-7.54446	1.39719	-8.8102	-12.0412
0.324	-3.30196	-2.94661	-5.40362	-2.38686	-1.07181	3.09113	-0.517552	5.23923	4.48416	-4.92393	-5.54266	-3.27082	2.39988			-8.90831	2.60434	10.4797	2.48508	-2.13406	0.409892	1.38477	-2.05456	2.44947	-7.48881	1.32294	-8.80916	-12.3075
0.326	-3.32746	-2.81173	-5.12607	-2.46778	-1.23731	3.08833	-0.491988	5.44566	4.43209	-4.82899	-5.55583	-3.35822	2.4929			-8.72864	2.42021	10.5113	2.38427	-2.128	0.490406	1.3869	-2.05825	2.42679	-7.41143	1.23474	-8.90879	-12.5044
0.328	-3.46174	-2.68215	-4.82405	-2.52536	-1.33897	3.06529	-0.452592	5.62386	4.44956	-4.66049	-5.5547	-3.43918	2.61887			-8.67055	2.3087	10.4554	2.26316	-2.07158	0.481642	1.39775	-2.10209	2.43295	-7.3317	1.14948	-8.97897	-12.5971
0.33	-3.65919	-2.60316	-4.80413	-2.55669	-1.37792	3.02735	-0.404096	5.78283	4.41953	-4.54863	-5.57379	-3.47402	2.71627			-8.68913	2.18131	10.4609	2.1491	-2.04095	0.394114	1.43157	-2.12313	2.44705	-7.33426	1.11049	-9.03493	-12.5667
0.332	-3.87332	-2.58803	-4.95834	-2.56365	-1.36398	3.03799	-0.33691	5.96463	4.41501	-4.54076	-5.55015	-3.51064	2.76966			-8.72893	2.04012	10.5934	2.02269	-2.03952	0.276696	1.47965	-2.18947	2.41129	-7.38345	1.0351	-9.06244	-12.5071
0.334	-4.0739	-2.63213	-5.19621	-2.55891	-1.29969	3.06039	-0.24626	6.13193	4.45694	-4.60303	-5.45572	-3.62377	2.64548			-8.78164	1.96925	10.7185	1.93028	-2.10631	0.15848	1.53083	-2.20028	2.4136	-7.46159	1.06177	-9.13546	-12.4396
0.336	-4.23494	-2.66287	-5.47397	-2.49761	-1.2466	3.09569	-0.209496	6.29205	4.51574	-4.67554	-5.33739	-3.82483	2.35791			-8.91968	2.00294	10.9848	1.88014	-2.19863	0.051226	1.55474	-2.21917	2.36018	-7.64476	1.11023	-9.25204	-12.2457
0.338	-4.30412	-2.79355	-5.66196	-2.43565	-1.16344	3.13127	-0.207004	6.42741	4.58482	-4.74958	-5.20274	-3.75403	2.07893			-8.98113	2.14862	11.3118	1.88758	-2.25373	0.023576	1.54248	-2.27616	2.28479	-7.89893	1.30423	-9.2748	-12.1057
0.34	-4.24364	-2.8936	-5.81214	-2.36482	-1.06833	3.16231	-0.249494	6.61937	4.63961	-4.82482	-5.14146	-3.85833	1.8977			-8.909	2.25179	11.5981	1.98946	-2.30766	0.091882	1.51441	-2.2993	2.23864	-8.06501	1.46324	-9.3424	-12.1155
0.342	-4.07658	-3.02842	-5.94979	-2.36536	-1.06144	3.16954	-0.312676	6.80212	4.72315	-4.92507	-5.05	-3.94526	1.83593			-8.90137	2.34122	11.8452	2.23558	-2.34562	0.187698	1.49422	-2.33558	2.20387	-8.17368	1.5541	-9.45494	-12.1669
0.344	-3.8569	-3.1054	-5.94742	-2.46849	-1.10475	3.13565	-0.412594	6.95946	4.80943	-5.0069	-4.99432	-4.04656	1.81591			-8.83047	2.44489	11.9279	2.49334	-2.31101	0.302246	1.48403	-2.42012	2.1657	-8.22606	1.52603	-9.52169	-12.1989
0.346	-3.76503	-3.13088	-5.82985	-2.60693	-1.18219	3.14084	-0.504168	6.94884	4.8622	-5.0332	-4.98863	-4.11596	1.85114			-8.8688	2.64117	11.9459	2.72192	-2.29349	0.410592	1.44976	-2.45371	2.0803	-8.22254	1.49968	-9.6243	-12.2471
0.348	-3.72148	-3.14034	-5.60346	-2.78816	-1.2984	3.15931	-0.540848	6.94956	4.89069	-4.99254	-5.0412	-4.26124	1.94825			-8.92028	2.91864	11.8927	2.86902	-2.2577	0.439502	1.42524	-2.45993	1.99168	-8.18749	1.48089	-9.78558	-12.4791
0.35	-3.75684	-3.13642	-5.39669	-2.95901	-1.37518	3.14843	-0.537936	7.02925	4.90603	-4.8396	-5.10227	-4.39106	2.04025			-8.8488	3.1453	11.8497	2.97741	-2.23898	0.369376	1.43625	-2.52151	1.89087	-8.08699	1.46402	-9.89695	-12.7494
0.352	-3.8264	-3.13243	-5.24219	-3.15365	-1.45905	3.1358	-0.52045	6.94183	4.86881	-4.67417	-5.14996	-4.52511	2.19682			-8.67075	3.21045	11.8949	3.04396	-2.23489	0.229362	1.46258	-2.55613	1.87197	-7.98875	1.4818	-10.0057	-12.8985
0.354	-3.92504	-3.17225	-5.31388	-3.23494	-1.42407	3.16187	-0.498694	6.91821	4.83273	-4.56771	-5.23369	-4.62106	2.35486			-8.57737	3.18688	12.0459	3.1347	-2.27646	0.095676	1.49332	-2.53324	1.83939	-7.96592	1.50055	-10.0967	-12.9986
0.356	-4.07613	-3.21534	-5.59024	-3.26843	-1.38142	3.19973	-0.474334	6.86007	4.7621	-4.60589	-5.34957	-4.74412	2.48648			-8.64641	3.14707	12.2699	3.17205	-2.31081	-0.000168	1.53685	-2.45869	1.74349	-8.03515	1.53066	-10.2116	-13.0006
0.358	-4.21238	-3.24629	-5.89274	-3.26329	-1.3683	3.23096	-0.449974	6.78647	4.74061	-4.68017	-5.43616	-4.87754	2.5149			-8.90134	3.14859	12.583	3.15381	-2.39046	-0.045598	1.56197	-2.36776	1.72659	-8.13771	1.51371	-10.3315	-12.8789
0.36	-4.33097	-3.23841	-6.03659	-3.27571	-1.25149	3.264	-0.407442	6.69963	4.73385	-4.7719	-5.52142	-4.96562	2.56399			-9.17307	3.13062	12.8715	3.06039	-2.47974	0.015974	1.59545	-2.20739	1.70699	-8.36331	1.52376	-10.4171	-12.7839
0.362	-4.52943	-3.22543	-6.17659	-3.28993	-1.19847	3.2591	-0.331156	6.671	4.71815	-4.84858	-5.59626	-5.03495	2.45911			-9.39655	3.02582	13.054	2.8884	-2.53096	0.105252	1.63946	-2.12057	1.75846	-8.5385	1.55001	-10.5	-12.741
0.364	-4.69567	-3.19841	-6.12821	-3.262	-1.15405	3.2543	-0.282492	6.72517	4.73732	-4.93707	-5.69164	-5.10497	2.20535			-9.59903	2.93213	13.0126	2.66424	-2.56575	0.21588	1.6742	-2.03364	1.87555	-8.66197	1.5398	-10.5883	-12.7525
0.366	-4.82857	-3.16159	-5.99899	-3.2499	-1.18154	3.21258	-0.213192	6.85614	4.78846	-5.03544	-5.81035	-5.18378	1.91174			-9.73668	2.88659	12.9506	2.44135	-2.56337	0.315532	1.68728	-2.01359	1.99415	-8.74103	1.56153	-10.6615	-12.7061
0.368	-4.91243	-3.16012	-5.74875	-3.18279	-1.25689	3.20922	-0.16996	6.9246	4.86896	-5.06318	-5.88431	-5.2369	1.62152			-9.72803	2.96552	12.8576	2.20685	-2.53863	0.350364	1.69383	-1.96976	2.09591	-8.73345	1.53698	-10.7196	-12.7088
0.37	-4.86783	-3.1842	-5.50437	-3.09169	-1.36801	3.18305	-0.20636	6.91782	4.85283	-5.04825	-5.96985	-5.3034	1.49241			-9.6448	3.08741	12.7618	2.0238	-2.50089	0.311472	1.69845	-1.90334	2.16801	-8.68944	1.53812	-10.7651	-12.8255
0.372	-4.8034	-3.22973	-5.42538	-3.00416	-1.46604	3.18802	-0.294994	6.85986	4.84721	-4.96843	-6.07412	-5.36822	1.51687			-9.53324	3.11832	12.6751	1.87515	-2.44457	0.227752	1.70019	-1.8838	2.21596	-8.6086	1.51264	-10.8455	-12.9612
0.374	-4.62304	-3.27251	-5.37215	-2.9352	-1.51094	3.19082	-0.399252	6.86515	4.7679	-4.82075	-6.11787	-5.40663	1.61834			-9.49826	3.1347	12.6111	1.78245	-2.40146	0.083636	1.71543	-1.88213	2.20163	-8.51414	1.53346	-10.8802	-13.0649
0.376	-4.45892	-3.29526	-5.47371	-2.84458	-1.51701	3.23278	-0.488306	6.77964	4.74694	-4.69137	-6.21268	-5.45637	1.83212			-9.49315	3.16271	12.6843	1.80887	-2.44132	-0.03955	1.72544	-1.90676	2.16959	-8.43933	1.52557	-10.9311	-13.174
0.378	-4.34286	-3.30187	-5.60342	-2.79103	-1.46101	3.28689	-0.52619	6.83452	4.71803	-4.65559	-6.3317	-5.50883	2.05657			-9.5292	3.26241	12.9496	1.92583	-2.50573	-0.129738	1.7284	-2.0139	2.11158	-8.3777	1.51592	-11.0107	-13.3101
0.38	-4.28156	-3.28191	-5.7591	-2.81224	-1.40029	3.31976	-0.514206	6.86326	4.72858	-4.70432	-6.4035	-5.56391	2.26426			-9.5079	3.32395	13.376	2.203	-2.61775	-0.094262	1.72696	-2.11536	2.0634	-8.39906	1.5065	-11.0804	-13.3469
0.382	-4.29373	-3.29752	-5.97575	-2.91567	-1.31383	3.35332	-0.477722	6.84926	4.7039	-4.76773	-6.47487	-5.63084	2.43709			-9.41822	3.41446	13.8468	2.50271	-2.67642	0.007462	1.75658	-2.27713	1.99126	-8.55861	1.53413	-11.1666	-13.3959
0.384	-4.35253	-3.29797	-6.18848	-3.02658	-1.1863	3.32711	-0.432334	6.87263	4.6878	-4.78853	-6.53023	-5.7168	2.54786			-9.39359	3.43445	14.2689	2.75923	-2.70715	0.129192	1.77657	-2.34711	1.93645	-8.70101	1.54748	-11.2385	-13.3975
0.386	-4.39047	-3.30763	-6.31705	-3.1704	-1.13952	3.266	-0.363538	6.88519	4.72102	-4.83125	-6.57465	-5.80889	2.51191			-9.43704	3.48146	14.6311	2.95719	-2.73169	0.253064	1.80481	-2.4456	1.92046	-8.83639	1.55803	-11.3606	-13.427
0.388	-4.43864	-3.34081	-6.33518	-3.2937	-1.15836	3.25384	-0.277116	6.81248	4.73602	-4.91823	-6.64649	-5.84909	2.3632			-9.59616	3.62741	14.7789	3.1214	-2.74042	0.307566	1.84496	-2.40548	1.84863	-8.93781	1.55901	-11.4781	-13.5372
0.39	-4.55364	-3.44169	-6.34463	-3.38429	-1.21692	3.24498	-0.217252	6.81174	4.74965	-5.02523	-6.6687	-5.80723	2.08389			-9.73631	3.81368	14.6549	3.24153	-2.72812	0.25802	1.87803	-2.35073	1.81101	-9.06734	1.5545	-11.5633	-13.5941
0.392	-4.62512	-3.54278	-6.53891	-3.43592	-1.35831	3.28107	-0.158298	6.61409	4.80501	-5.12592	-6.73313	-5.6636	1.80111			-9.86611	3.97295	14.365	3.27582	-2.70358	0.160594	1.8831	-2.26211	1.77671	-9.15132	1.56947	-11.5814	-13.5973
0.394	-4.7356	-3.6435	-6.7194	-3.45369	-1.46132	3.30158	-0.11522	6.67318	4.81498	-5.1954	-6.77624	-5.45633	1.59278			-10.0291	4.10246	13.9616	3.21899	-2.68313	0.005096	1.89147	-2.19941	1.76509	-9.17948	1.56947	-11.5529	-13.6748
0.396	-4.86514	-3.72393	-6.86	-3.47752	-1.52869	3.31129	-0.132706	6.82636	4.81793	-5.18011	-6.81418	-5.35591	1.5717			-10.1781	4.09805	13.8417	3.0743	-2.63598	-0.123634	1.88003	-2.14161	1.68508	-9.16332	1.58155	-11.4913	-13.7439
0.398	-5.02729	-3.82007	-6.9348	-3.49264	-1.52043	3.34166	-0.187012	7.05538	4.88691	-5.1144	-6.86974	-5.31055	1.61078			-10.3732	4.25832	13.9523	2.8915	-2.63887	-0.20216	1.85641	-2.01608	1.61938	-9.13419	1.58273	-11.3126	-13.8079
0.4	-5.19719	-3.91258	-6.91138	-3.44096	-1.45029	3.37392	-0.298116	7.32602	4.93346	-4.97269	-6.92076	-5.32857	1.73919			-10.5016	4.40273	14.194	2.7138	-2.71974	-0.173936	1.85193	-2.07507	1.56579	-9.08257	1.57517	-11.1864	-13.8644
0.402	-5.32885	-4.02871	-6.64175	-3.37952	-1.38212	3.39941	-0.404474	7.49249	4.94561	-4.86223	-6.96773	-5.44533	1.90075			-10.6152	4.55589	14.4568	2.49277	-2.80192	-0.08113	1.8692	-2.06535	1.51126	-9.05629	1.58453	-11.1514	-13.9466
0.404	-5.47057	-4.18634	-6.40163	-3.29038	-1.30358	3.37525	-0.477092	7.60831	4.9782	-4.83567	-7.01884	-5.64049	2.11792			-10.6389	4.62825	14.6242	2.33579	-2.85652	0.033404	1.8745	-2.05667	1.47242	-9.01825	1.58491	-11.2189	-14.0571
0.406	-5.46384	-4.33362	-6.35789	-3.23218	-1.16122	3.36392	-0.480242	7.72766	5.0351	-4.87665	-7.10123	-5.7758	2.30801			-10.578	4.64554	14.7201	2.18403	-2.88863	0.118174	1.87025	-2.03125	1.43871	-8.95762	1.58623	-11.2712	-14.0988
0.408	-5.46178	-4.38529	-6.48571	-3.2215	-1.11895	3.36911	-0.471422	7.90009	5.06295	-4.9233	-7.17667	-6.0284	2.42623			-10.5332	4.72209	14.769	2.1121	-2.89167	0.137536	1.86897	-2.00638	1.35463	-8.98562	1.56831	-11.3911	-14.0901
0.41	-5.38912	-4.48214	-6.75489	-3.2318	-1.19722	3.3355	-0.443044	8.05482	5.11927	-4.96742	-7.23566	-6.15243	2.46772			-10.5341	4.87906	14.6998	2.12895	-2.90116	0.099638	1.8745	-2.01523	1.27726	-9.05261	1.58028	-11.4675	-14.0783
0.412	-5.25385	-4.5813	-7.08746	-3.35919	-1.28253	3.32451	-0.388458	8.23756	5.17709	-5.01623	-7.34625	-6.25254	2.38496			-10.4904	5.0231	14.6084	2.1603	-2.90574	0.00791	1.91947	-2.02287	1.22909	-9.13881	1.58773	-11.5439	-14.0888
0.414	-5.10972	-4.66327	-7.36254	-3.54269	-1.4013	3.33579	-0.336532	8.444	5.19436	-5.07366	-7.43201	-6.38267	2.18502			-10.4948	5.12681	14.5167	2.20772	-2.8849	-0.124026	1.94173	-2.02226	1.14724	-9.23328	1.603	-11.6173	-14.0977
0.416	-5.01887	-4.68237	-7.51986	-3.7365	-1.51543	3.3609	-0.270228	8.67201	5.20911	-5.12487	-7.52627	-6.51048	1.91584			-10.4832	5.18332	14.5687	2.30296	-2.86324	-0.247268	1.97382	-2.02471	1.10403	-9.33695	1.61997	-11.6764	-14.1946
0.418	-5.00199	-4.67148	-7.47705	-3.88051	-1.58119	3.38779	-0.185556	8.82788	5.2402	-5.14039	-7.59969	-6.64623	1.70013			-10.4125	5.32876	14.7106	2.44264	-2.84346	-0.354172	1.99923	-2.01712	1.0239	-9.42438	1.63646	-11.7183	-14.2793
0.42	-5.0051	-4.6524	-7.27588	-3.98469	-1.55418	3.43259	-0.171416	8.72732	5.28233	-5.09057	-7.59363	-6.76186	1.54139			-10.3836	5.64844	14.7791	2.6069	-2.88884	-0.36113	1.99639	-2.04464	0.959742	-9.51132	1.69959	-11.8221	-14.3895
0.422	-5.04738	-4.58941	-6.99194	-3.9906	-1.46782	3.45141	-0.191828	8.75967	5.28839	-5.068	-7.60329	-6.87254	1.54384			-10.4063	5.96904	14.9072	2.74665	-2.95544	-0.269374	1.99178	-2.03843	0.867118	-9.62172	1.76189	-11.8899	-14.4292
0.424	-5.1003	-4.55473	-6.82378	-3.9807	-1.363	3.47712	-0.209118	8.71598	5.33392	-5.04736	-7.55552	-6.98501	1.63127			-10.4694	6.25255	14.9948	2.82414	-3.01253	-0.181566	1.99436	-2.0237	0.849982	-9.73976	1.8381	-11.9862	-14.5081
0.426	-5.18725	-4.57566	-6.8721	-3.92197	-1.2523	3.49381	-0.255122	8.64403	5.37212	-5.02645	-7.45361	-7.08942	1.78842			-10.521	6.4108	15.161	2.88616	-3.05004	-0.090566	1.98409	-1.97602	0.778092	-9.82099	1.86319	-12.0677	-14.4811
0.428	-5.25182	-4.59847	-7.07508	-3.83474	-1.13718	3.51645	-0.313334	8.54147	5.40543	-5.02583	-7.32298	-7.0526	2.03104			-10.6175	6.50623	15.3998	2.93952	-3.07727	-0.026446	1.96203	-1.95037	0.70931	-9.84446	1.81096	-12.1868	-14.4738
0.43	-5.33603	-4.63281	-7.3731	-3.7518	-1.13873	3.50876	-0.406952	8.40813	5.43456	-5.11787	-7.23405	-6.94599	2.23299			-10.7173	6.69194	15.6926	2.93528	-3.10813	-0.042308	1.93931	-1.84121	0.627606	-9.87431	1.64455	-12.1989	-14.4394
0.432	-5.40756	-4.77502	-7.60854	-3.70166	-1.14996	3.48349	-0.454902	8.25419	5.47299	-5.24145	-7.23313	-6.83897	2.37986			-10.8623	6.82744	16.116	2.94073	-3.13589	-0.127316	1.91552	-1.71437	0.515172	-9.91057	1.4958	-12.2576	-14.4345
0.434	-5.44431	-5.03902	-7.70515	-3.66607	-1.2214	3.49616	-0.451206	8.29779	5.5302	-5.36088	-7.2308	-6.76451	2.45637			-11.0258	6.85486	16.5149	2.85349	-3.12943	-0.255808	1.91381	-1.62701	0.42231	-9.95949	1.35268	-12.1811	-14.4498
0.436	-5.60524	-5.21286	-7.79873	-3.61526	-1.36773	3.51638	-0.429282	8.22961	5.59595	-5.4454	-7.27026	-6.74103	2.38598			-11.1964	6.78229	16.7277	2.68374	-3.10412	-0.38185	1.93162	-1.55058	0.31969	-10.0023	1.22891	-12.0215	-14.5191
0.438	-5.76632	-5.28942	-7.77553	-3.60105	-1.45373	3.52232	-0.389004	8.17786	5.59982	-5.49518	-7.31192	-6.84037	2.23811			-11.3277	6.69966	16.6956	2.54468	-3.11051	-0.478772	1.96658	-1.51449	0.211988	-10.0051	1.12287	-11.909	-14.514
0.44	-5.96708	-5.37999	-7.72038	-3.60282	-1.51941	3.57584	-0.312284	8.20613	5.5483	-5.46214	-7.3166	-7.05453	2.09261			-11.3582	6.74796	16.6073	2.40535	-3.11448	-0.521612	2.00616	-1.53035	0.129052	-9.99264	1.06418	-11.8981	-14.5836
0.442	-6.13507	-5.44379	-7.50313	-3.63523	-1.55977	3.60066	-0.245	8.14163	5.48646	-5.33751	-7.29331	-7.28213	1.89839			-11.3807	6.85395	16.4438	2.25994	-3.14173	-0.456624	2.05023	-1.61493	0.09478	-9.95435	1.11873	-11.9537	-14.7306
0.444	-6.16645	-5.37649	-7.29712	-3.63471	-1.50633	3.63107	-0.231336	8.45767	5.4146	-5.18896	-7.32136	-7.48136	1.65738			-11.3398	7.01593	16.3377	2.13858	-3.16233	-0.353206	2.10518	-1.58395	0.095704	-9.92201	1.16619	-11.9836	-14.8313
0.446	-6.16169	-5.25336	-7.26083	-3.63135	-1.42929	3.64934	-0.256788	8.6548	5.35689	-5.09562	-7.36291	-7.6165	1.49398			-11.3113	7.21315	16.3605	2.03437	-3.24163	-0.254492	2.15841	-1.64842	0.0791	-9.90049	1.18112	-11.9907	-14.9004
0.448	-6.09118	-5.14849	-7.42533	-3.62188	-1.32894	3.66758	-0.285964	8.87874	5.33446	-5.07704	-7.43393	-7.7352	1.38573			-11.2869	7.33286	16.4317	1.97361	-3.25373	-0.207144	2.16873	-1.69406	0.076286	-9.83983	1.2413	-12.0259	-15.0173
0.45	-5.97311	-5.036	-7.67435	-3.63138	-1.20515	3.64872	-0.305578	9.00666	5.28899	-5.10539	-7.52892	-7.85607	1.43954			-11.263	7.54853	16.6028	1.97883	-3.28443	-0.219478	2.18432	-1.75589	0.122024	-9.81394	1.24881	-12.0645	-15.0645
0.452	-5.78211	-5.09601	-7.8409	-3.68677	-1.21608	3.64256	-0.30723	9.0239	5.27276	-5.16695	-7.63664	-7.99134	1.59284			-11.2453	7.75158	16.9997	2.00977	-3.30588	-0.269682	2.16955	-1.83308	0.201978	-9.82958	1.31086	-12.0805	-15.0141
0.454	-5.57449	-5.2988	-7.94675	-3.82166	-1.3144	3.65775	-0.285628	9.16325	5.33061	-5.23117	-7.67698	-8.15741	1.80692			-11.1903	7.91587	17.5015	2.02719	-3.29211	-0.35616	2.13548	-1.89724	0.33236	-9.9888	1.45226	-12.1408	-14.8686
0.456	-5.37288	-5.6267	-8.07302	-3.97512	-1.41623	3.70495	-0.24059	9.18834	5.40406	-5.27772	-7.67924	-8.27093	2.02194			-11.1332	8.05081	17.9348	2.03973	-3.28559	-0.47432	2.10428	-2.00217	0.45584	-10.1567	1.55446	-12.1401	-14.8469
0.458	-5.34709	-5.93183	-8.15996	-4.16315	-1.54274	3.73505	-0.200746	9.19264	5.48832	-5.37895	-7.64207	-8.4506	2.18911			-11.0815	8.138	18.3449	2.07819	-3.23604	-0.585774	2.07644	-2.07815	0.5432	-10.3078	1.69845	-12.1621	-14.8475
0.46	-5.35069	-6.01562	-8.14939	-4.28989	-1.60923	3.7616	-0.16254	9.13097	5.52565	-5.49902	-7.61117	-8.60405	2.26099			-11.1179	8.24772	18.5741	2.13135	-3.23746	-0.66843	2.0658	-2.04205	0.611464	-10.4481	1.79355	-12.1468	-14.8581
0.462	-5.42759	-6.07009	-8.09389	-4.42299	-1.62431	3.80484	-0.12922	9.08747	5.4644	-5.588	-7.55418	-8.62497	2.21239			-11.2179	8.35036	18.6467	2.22712	-3.22295	-0.689248	2.06665	-2.05115	0.605556	-10.5018	1.85226	-12.1352	-14.8417
0.464	-5.47887	-6.01273	-8.14481	-4.44846	-1.60721	3.83347	-0.152796	8.97233	5.45093	-5.61295	-7.50767	-8.56265	2.0649			-11.292	8.41996	18.544	2.33946	-3.2731	-0.617778	2.08729	-1.99902	0.601132	-10.5126	1.7999	-12.1775	-14.8215
0.466	-5.54053	-5.85831	-8.40259	-4.46657	-1.48439	3.85437	-0.193438	8.82868	5.42392	-5.61498	-7.50168	-8.42195	1.96756			-11.3849	8.42286	18.4412	2.41683	-3.32871	-0.514444	2.13018	-2.00654	0.560042	-10.5215	1.71336	-12.2129	-14.94
0.468	-5.66726	-5.63346	-8.70038	-4.4232	-1.37137	3.85092	-0.2919	8.68473	5.44263	-5.57278	-7.58369	-8.1913	1.9052			-11.5162	8.41621	18.3246	2.47454	-3.35818	-0.424074	2.1433	-1.96067	0.511882	-10.4758	1.65845	-12.2154	-15.1777
0.47	-5.76171	-5.57298	-8.85231	-4.3433	-1.26826	3.83075	-0.399336	8.58598	5.41355	-5.44411	-7.69563	-7.94307	1.80617			-11.6454	8.54272	18.3066	2.46907	-3.38722	-0.388388	2.16237	-1.87513	0.45017	-10.4445	1.62267	-12.1924	-15.4829
0.472	-5.8568	-5.77895	-8.81124	-4.24981	-1.1926	3.81979	-0.479416	8.48971	5.45895	-5.32447	-7.80716	-7.71119	1.69919			-11.7341	8.74233	18.4699	2.41585	-3.40784	-0.409304	2.20697	-1.75274	0.36701	-10.4072	1.60464	-12.017	-15.6783
0.474	-6.02258	-6.09848	-8.50734	-4.12041	-1.21498	3.8208	-0.514038	8.39551	5.46676	-5.27345	-7.88796	-7.61796	1.65847			-11.7809	9.00266	18.5585	2.23965	-3.43994	-0.479416	2.24664	-1.65397	0.318458	-10.3082	1.61952	-11.8654	-15.7138
0.476	-6.17483	-6.49894	-8.18796	-4.05132	-1.23304	3.84002	-0.51744	8.37952	5.49345	-5.28847	-7.99834	-7.63686	1.65701			-11.8339	9.27657	18.633	2.02576	-3.41867	-0.576534	2.25009	-1.57191	0.200704	-10.2524	1.64332	-11.7861	-15.7086
0.478	-6.39619	-6.77146	-8.08972	-4.04048	-1.34716	3.86229	-0.481488	8.34079	5.50059	-5.30078	-8.1255	-7.64137	1.70156			-11.9134	9.43901	18.7298	1.7855	-3.44522	-0.687876	2.21969	-1.54983	0.12131	-10.2409	1.63663	-11.6857	-15.6549
0.48	-6.46916	-6.97172	-8.20323	-4.09871	-1.47864	3.89038	-0.406574	8.43325	5.56209	-5.33026	-8.21022	-7.66534	1.84745			-11.9143	9.54513	18.8318	1.62057	-3.44102	-0.820288	2.20793	-1.64975	0.058002	-10.3298	1.64886	-11.6735	-15.4636
0.482	-6.41717	-7.0296	-8.49477	-4.11958	-1.59929	3.93939	-0.336294	8.74384	5.58547	-5.38398	-8.32565	-7.72122	2.02559			-11.8528	9.63883	18.9298	1.54175	-3.45759	-0.903728	2.19988	-1.62079	-0.03577	-10.4627	1.65015	-11.6569	-15.3043
0.484	-6.35817	-6.90168	-8.8118	-4.08939	-1.69231	3.98311	-0.240884	8.79549	5.61904	-5.44074	-8.40784	-7.6888	2.14543			-11.8114	9.6613	19.1286	1.51413	-3.44772	-0.926534	2.21663	-1.54864	-0.095452	-10.6015	1.67733	-11.7422	-15.2534
0.486	-6.2978	-6.74699	-9.07413	-4.10159	-1.67965	4.00197	-0.16702	9.07693	5.61959	-5.55341	-8.50604	-7.64266	2.12437			-11.7967	9.58139	19.3781	1.56594	-3.40547	-0.87346	2.21651	-1.61074	-0.19068	-10.6696	1.6898	-11.8617	-15.2257
0.488	-6.19317	-6.57418	-9.25679	-4.16711	-1.58388	4.03736	-0.110992	9.23835	5.6749	-5.67953	-8.58164	-7.47253	2.04155			-11.7429	9.57135	19.6862	1.62592	-3.43251	-0.76664	2.21635	-1.62912	-0.257138	-10.7644	1.69827	-12.0684	-15.2034
0.49	-6.07573	-6.51456	-9.26657	-4.29643	-1.44278	4.01976	-0.1211	9.29727	5.67314	-5.73934	-8.67545	-7.31756	1.89753			-11.7183	9.61615	19.8068	1.68451	-3.47809	-0.676984	2.21154	-1.59513	-0.354144	-10.7982	1.73459	-12.2408	-15.17
0.492	-5.95599	-6.70263	-9.21889	-4.41921	-1.31853	4.01825	-0.199206	9.67018	5.70129	-5.74323	-8.80026	-7.25395	1.81315			-11.7075	9.78984	19.7893	1.73488	-3.50113	-0.632814	2.22867	-1.59064	-0.435736	-10.8287	1.70685	-12.3078	-15.2659
0.494	-5.82088	-7.08256	-9.04396	-4.57377	-1.23446	3.98686	-0.301	9.88124	5.73334	-5.70924	-8.91526	-7.16285	1.79565			-11.6674	10.1191	19.6695	1.76057	-3.5352	-0.634718	2.25266	-1.62294	-0.480984	-10.8059	1.71349	-12.2471	-15.4544
0.496	-5.71754	-7.53889	-8.77713	-4.72415	-1.25826	3.98434	-0.381248	10.1023	5.74652	-5.68207	-9.0405	-7.27651	1.78387			-11.5854	10.4161	19.5849	1.75049	-3.54976	-0.677446	2.27636	-1.68182	-0.513086	-10.7939	1.72516	-12.1367	-15.6597
0.498	-5.66889	-8.00531	-8.66548	-4.89628	-1.28897	4.01555	-0.437486	10.2693	5.78101	-5.64383	-9.16772	-7.23869	1.8321			-11.558	10.6603	19.5266	1.72406	-3.57578	-0.75929	2.31735	-1.67668	-0.58702	-10.8055	1.73711	-12.064	-15.9252
0.5	-5.67221	-8.37231	-8.74528	-4.99463	-1.37976	4.03809	-0.493066	10.4446	5.7864	-5.6414	-9.27469	-7.34565	1.90523			-11.5433	10.8428	19.5672	1.68386	-3.55642	-0.840308	2.34741	-1.733	-0.662872	-10.7741	1.80597	-12.069	-16.186
0.502	-5.67302	-8.52585	-8.97842	-5.1101	-1.51025	4.08477	-0.527562	10.6511	5.80734	-5.68401	-9.29795	-7.48859	2.01646			-11.5456	11.0004	19.672	1.60614	-3.57741	-0.967988	2.33031	-1.70349	-0.705082	-10.7279	1.85618	-12.0674	-16.3122
0.504	-5.71313	-8.49659	-9.26628	-5.21095	-1.63804	4.11876	-0.474082	10.8519	5.83099	-5.72715	-9.31673	-7.64446	2.15571			-11.5879	11.0445	19.9772	1.53681	-3.58887	-1.07822	2.32992	-1.7724	-0.760298	-10.724	1.92685	-12.0965	-16.4281
0.506	-5.72775	-8.35958	-9.45994	-5.23928	-1.72735	4.14341	-0.389844	10.8163	5.81787	-5.75897	-9.31132	-7.76845	2.22716			-11.6219	10.9313	20.457	1.44001	-3.5924	-1.15374	2.33825	-1.82626	-0.834428	-10.7343	1.99184	-12.0857	-16.4202
0.508	-5.72974	-8.16985	-9.60562	-5.24066	-1.71361	4.1747	-0.31822	10.8138	5.86869	-5.76685	-9.30675	-7.92376	2.3119			-11.6721	10.8598	20.8262	1.34145	-3.60458	-1.18338	2.34374	-1.87972	-0.920794	-10.7414	2.0117	-12.117	-16.4238
0.51	-5.79629	-7.93829	-9.72	-5.25153	-1.58183	4.1928	-0.233674	10.8803	5.87982	-5.75249	-9.36501	-8.12956	2.35508			-11.7638	10.8995	21.0315	1.32376	-3.59797	-1.1499	2.34832	-1.98387	-0.960442	-10.7588	1.96956	-12.1773	-16.4321
0.512	-5.90506	-7.94853	-9.76305	-5.19905	-1.45373	4.19604	-0.163478	10.8694	5.91793	-5.72667	-9.42199	-8.25322	2.19376			-11.8391	10.9914	21.1018	1.43854	-3.62733	-1.06702	2.36527	-2.02413	-0.992964	-10.7886	1.84041	-12.2118	-16.4956
0.514	-5.93216	-8.25091	-9.7201	-5.11382	-1.32086	4.21739	-0.11193	10.8031	5.93103	-5.68555	-9.50415	-8.4608	1.89276			-11.9698	11.1741	21.0129	1.68827	-3.67079	-0.97454	2.38735	-1.96781	-1.0836	-10.7995	1.70345	-12.2494	-16.4659
0.516	-5.99897	-8.68563	-9.53553	-5.02754	-1.26958	4.22353	-0.087626	10.753	5.92843	-5.6476	-9.55905	-8.61815	1.59219			-12.046	11.4537	20.87	1.94169	-3.70609	-0.922474	2.4046	-1.89081	-1.14555	-10.8304	1.61011	-12.2722	-16.4269
0.518	-6.07827	-9.10896	-9.34293	-4.93587	-1.29955	4.17428	-0.148218	10.6613	5.96443	-5.63164	-9.56952	-8.79665	1.38785			-12.1209	11.6359	20.7152	2.15454	-3.70747	-0.91623	2.43645	-1.78059	-1.21381	-10.8858	1.54711	-12.2955	-16.5167
0.52	-6.1808	-9.49064	-9.22075	-4.83244	-1.35888	4.13588	-0.254198	10.5145	6.01079	-5.62461	-9.58105	-8.93134	1.32219			-12.1446	11.7799	20.6156	2.27716	-3.71195	-0.9723	2.44845	-1.61405	-1.2959	-10.9571	1.50247	-12.3048	-16.5945
0.522	-6.32054	-9.75402	-9.27014	-4.68889	-1.46432	4.12952	-0.330078	10.3371	6.0397	-5.63801	-9.5678	-9.0609	1.35962			-12.1528	11.858	20.5665	2.32613	-3.71594	-1.03459	2.46228	-1.51565	-1.35302	-11.0367	1.43132	-12.2975	-16.6293
0.524	-6.36712	-9.86314	-9.4562	-4.52028	-1.57104	4.15919	-0.391538	10.3509	6.07312	-5.66215	-9.51376	-9.18877	1.45692			-12.0709	11.9794	20.7337	2.3079	-3.77623	-1.12239	2.4873	-1.41966	-1.42842	-11.1105	1.3928	-12.321	-16.6773
0.526	-6.37321	-9.84962	-9.68087	-4.42385	-1.65175	4.20371	-0.42224	10.3756	6.13578	-5.67804	-9.43347	-9.29541	1.53667			-11.9325	12.0087	21.0901	2.23299	-3.78403	-1.22678	2.518	-1.46828	-1.46734	-11.1779	1.42118	-12.3336	-16.7928
0.528	-6.38639	-9.70133	-9.84465	-4.37552	-1.76869	4.22541	-0.409486	10.4934	6.15936	-5.7311	-9.27542	-9.42761	1.63391			-11.7703	11.8619	21.4857	2.10171	-3.8148	-1.34074	2.50785	-1.53261	-1.46945	-11.2111	1.5646	-12.3276	-17.0115
0.53	-6.42001	-9.42316	-10.0326	-4.43303	-1.78349	4.23674	-0.337302	10.7449	6.16127	-5.79977	-9.16447	-9.53968	1.77899			-11.6819	11.9111	21.7655	1.977	-3.79579	-1.44353	2.50135	-1.56671	-1.38975	-11.2296	1.71668	-12.3453	-17.1324
0.532	-6.43959	-9.21054	-10.1843	-4.53149	-1.73482	4.25396	-0.265538	10.9269	6.20913	-5.84755	-9.08979	-9.65535	1.96146			-11.6679	12.0777	21.9407	1.89815	-3.78323	-1.505	2.4921	-1.5826	-1.32115	-11.2231	1.82214	-12.3436	-17.1552
0.534	-6.41437	-9.24073	-10.2286	-4.57632	-1.64829	4.26464	-0.18802	11.2373	6.26433	-5.90444	-9.03484	-9.81842	2.13258			-11.634	12.2092	22.0396	1.81495	-3.81857	-1.51406	2.51933	-1.58112	-1.23458	-11.2152	1.87226	-12.3728	-17.1438
0.536	-6.28508	-9.5079	-10.1327	-4.62693	-1.48194	4.28431	-0.130424	11.486	6.28778	-5.93421	-9.02196	-10.002	2.26337			-11.6472	12.2916	21.9496	1.71508	-3.85104	-1.44096	2.52263	-1.6126	-1.19017	-11.1819	1.84808	-12.4006	-17.099
0.538	-6.20859	-9.9596	-9.89969	-4.68142	-1.3832	4.31322	-0.070378	11.6601	6.28634	-5.96032	-9.08254	-10.169	2.28456			-11.7132	12.408	21.8632	1.61167	-3.88198	-1.33937	2.54222	-1.62466	-1.16984	-11.1641	1.79616	-12.4045	-17.0722
0.54	-6.13686	-10.4241	-9.65034	-4.72753	-1.33521	4.33441	-0.01428	11.738	6.22706	-5.9299	-9.16021	-10.3096	2.11816			-11.7907	12.5816	21.7367	1.53808	-3.91205	-1.26217	2.54443	-1.65115	-1.19234	-11.1562	1.79375	-12.4481	-17.1202
0.542	-6.03599	-10.805	-9.48419	-4.76049	-1.35582	4.33591	-0.07434	11.7054	6.08793	-5.87598	-9.23822	-10.4572	1.81195			-11.7779	12.7094	21.6165	1.5598	-3.92595	-1.22632	2.56578	-1.73257	-1.27516	-11.1636	1.77887	-12.5193	-17.1615
0.544	-5.96842	-11.0719	-9.53119	-4.75328	-1.41518	4.30497	-0.177422	11.7	5.93778	-5.75351	-9.32168	-10.5486	1.57452			-11.6853	12.8501	21.5497	1.62984	-3.94313	-1.25222	2.58632	-1.764	-1.39082	-11.1792	1.77082	-12.6319	-17.1621
0.546	-5.9211	-11.2094	-9.77105	-4.75812	-1.54378	4.35362	-0.271138	11.7781	5.86768	-5.58691	-9.4285	-10.5625	1.36114			-11.7226	12.9336	21.6628	1.75685	-3.94954	-1.31873	2.57767	-1.81646	-1.45393	-11.1868	1.7884	-12.7618	-17.2659
0.548	-5.95563	-11.1695	-10.0734	-4.72727	-1.64297	4.38647	-0.344036	11.7593	5.79804	-5.48103	-9.49726	-10.5381	1.32016			-11.7588	12.9294	21.8893	1.91663	-3.98051	-1.38848	2.611	-1.76075	-1.4792	-11.2621	1.81646	-12.8321	-17.4162
0.55	-5.98154	-11.0146	-10.2572	-4.7123	-1.73838	4.38018	-0.398776	11.6147	5.70454	-5.43455	-9.58563	-10.5356	1.39982			-11.8951	12.8729	22.1801	2.03798	-3.95157	-1.46845	2.61229	-1.65446	-1.49558	-11.3501	1.83177	-12.8642	-17.4686
0.552	-6.06704	-10.7425	-10.3359	-4.70022	-1.80456	4.3749	-0.434826	11.4372	5.63888	-5.47204	-9.67274	-10.518	1.63321			-12.011	12.9566	22.4365	2.12668	-3.94174	-1.5723	2.57733	-1.49533	-1.53889	-11.3889	1.81913	-12.7897	-17.4511
0.554	-6.11255	-10.5386	-10.4112	-4.66168	-1.83498	4.32736	-0.425278	11.1923	5.5931	-5.55423	-9.76002	-10.5379	1.85581			-12.0723	13.1596	22.5759	2.19446	-3.95188	-1.65313	2.57855	-1.26134	-1.54932	-11.3677	1.80809	-12.6395	-17.2799
0.556	-6.22229	-10.5623	-10.45	-4.70282	-1.78317	4.28212	-0.399994	11.0572	5.59987	-5.68033	-9.86145	-10.6109	2.09979			-12.1202	13.3359	22.6159	2.21388	-3.97067	-1.70621	2.6095	-1.16098	-1.55866	-11.3978	1.84695	-12.473	-17.2572
0.558	-6.29513	-10.8826	-10.4658	-4.83178	-1.6672	4.2735	-0.365078	11.1387	5.61068	-5.80577	-9.9435	-10.8052	2.25673			-12.1049	13.415	22.5586	2.1671	-3.97986	-1.71074	2.6361	-1.10768	-1.5563	-11.4396	1.87911	-12.3679	-17.3104
0.56	-6.34476	-11.3238	-10.4665	-4.94663	-1.56758	4.31465	-0.322126	11.0442	5.7065	-5.90194	-9.9864	-11.0547	2.2797			-12.0019	13.5364	22.3762	2.09716	-4.01996	-1.65948	2.68463	-1.04979	-1.56521	-11.4524	1.89783	-12.3189	-17.3727
0.562	-6.38729	-11.682	-10.5155	-5.05539	-1.50461	4.35239	-0.25613	11.294	5.80115	-5.94941	-10.0767	-11.33	2.23087			-11.9416	13.6251	22.2046	2.03686	-4.06024	-1.5924	2.72656	-1.1086	-1.53293	-11.4179	1.86918	-12.2717	-17.4436
0.564	-6.44248	-11.996	-10.4635	-5.11711	-1.4909	4.39579	-0.170744	11.5126	5.92208	-5.92911	-10.1465	-11.4533	2.17353			-11.8517	13.7423	22.0745	2.02691	-4.09997	-1.56575	2.77435	-1.15531	-1.45621	-11.3901	1.90516	-12.1683	-17.6536
0.566	-6.47815	-12.1585	-10.4386	-5.14312	-1.55373	4.42154	-0.09058	11.6629	6.05919	-5.88353	-10.2159	-11.5197	2.02677			-11.7962	13.8606	22.0527	1.98387	-4.09059	-1.54735	2.80477	-1.13078	-1.37232	-11.3991	1.91327	-12.1076	-17.8774
0.568	-6.5211	-12.1542	-10.4452	-5.16845	-1.65812	4.42105	-0.015232	11.896	6.17162	-5.77633	-10.2514	-11.4814	1.82365			-11.8008	13.9395	22.1594	1.9199	-4.07823	-1.57196	2.82985	-1.15286	-1.32175	-11.414	1.97705	-12.0705	-18.0155
0.57	-6.49449	-12.0175	-10.5092	-5.16523	-1.78422	4.39347	0.0231	12.0555	6.18562	-5.64291	-10.3383	-11.3921	1.60964			-11.7886	13.8233	22.2937	1.85935	-4.07029	-1.63619	2.82607	-1.14803	-1.28521	-11.4378	1.99462	-12.123	-18.0946
0.572	-6.41325	-11.7638	-10.4969	-5.16139	-1.87614	4.38176	0.033922	12.3026	6.15623	-5.56307	-10.4172	-11.2482	1.47055			-11.8074	13.7712	22.4093	1.8535	-4.07522	-1.73958	2.80419	-1.18825	-1.26126	-11.4528	2.0257	-12.2045	-18.1717
0.574	-6.34803	-11.4221	-10.4122	-5.10707	-1.91636	4.32323	0.026096	12.4368	6.07373	-5.54891	-10.4746	-11.0392	1.52174			-11.8495	13.7874	22.6285	1.9271	-4.05625	-1.83841	2.78606	-1.20975	-1.31093	-11.459	2.03484	-12.3063	-18.2572
0.576	-6.29481	-11.1477	-10.3595	-4.94446	-1.92573	4.26125	0.028658	12.3685	6.05597	-5.58047	-10.5038	-10.8162	1.74007			-11.8871	13.8259	22.7906	2.02059	-4.0756	-1.92583	2.77509	-1.28703	-1.39392	-11.4787	2.04001	-12.4378	-18.2078
0.578	-6.28354	-10.9664	-10.292	-4.76483	-1.85514	4.21806	0.031626	12.3586	6.00753	-5.60022	-10.588	-10.6156	1.99359			-11.923	13.8679	22.8798	2.16244	-4.12824	-1.98701	2.77346	-1.35856	-1.51256	-11.5535	2.04106	-12.5037	-17.9483
0.58	-6.31341	-10.9114	-10.3423	-4.70016	-1.76606	4.20493	0.015414	12.3924	6.05228	-5.63086	-10.61	-10.4151	2.19117			-11.9223	13.8556	22.8535	2.31059	-4.18558	-2.05008	2.76056	-1.45974	-1.59121	-11.6323	2.07504	-12.436	-17.8041
0.582	-6.3182	-11.0281	-10.3986	-4.70673	-1.69823	4.25418	0.024178	12.4125	6.01635	-5.65726	-10.6954	-10.3389	2.2724			-11.9658	13.8963	22.766	2.42445	-4.2275	-2.05485	2.71688	-1.44607	-1.70874	-11.6753	2.07549	-12.4016	-17.8162
0.584	-6.3691	-11.158	-10.5262	-4.74879	-1.66845	4.31936	0.050862	12.4047	5.99418	-5.74288	-10.7447	-10.3611	2.24907			-12.0924	14.0574	22.6328	2.38987	-4.24787	-1.99308	2.70036	-1.41907	-1.78352	-11.7186	2.07281	-12.4174	-17.8613
0.586	-6.43224	-11.3797	-10.6737	-4.85951	-1.72498	4.36913	0.051912	12.4197	5.97846	-5.8415	-10.8372	-10.3668	2.16782			-12.2473	14.3074	22.562	2.36725	-4.25695	-1.92345	2.70239	-1.29018	-1.88521	-11.7458	2.08956	-12.4499	-17.8559
0.588	-6.4353	-11.5372	-10.774	-5.00263	-1.83166	4.40742	0.066934	12.25	5.96847	-5.94237	-10.8998	-10.4116	2.03599			-12.3216	14.6041	22.4475	2.3924	-4.23186	-1.85543	2.71555	-1.1446	-1.98449	-11.7304	2.11406	-12.4628	-17.92
0.59	-6.45218	-11.7067	-10.9662	-5.17234	-1.94533	4.40012	0.08953	12.246	5.98359	-6.0093	-10.9686	-10.4673	1.95271			-12.454	14.817	22.2952	2.41819	-4.17613	-1.84542	2.7365	-0.965384	-2.04826	-11.7173	2.08106	-12.4525	-18.0696
0.592	-6.45481	-11.8336	-11.1666	-5.34397	-2.01459	4.34483	0.1085	12.1968	5.96407	-6.00446	-11.0568	-10.5528	1.74094			-12.5481	14.9104	22.2309	2.49368	-4.1214	-1.85433	2.7491	-0.75691	-2.08992	-11.7104	2.1128	-12.4284	-18.2588
0.594	-6.53048	-11.8719	-11.3605	-5.46227	-2.01489	4.33384	0.127568	12.2462	5.98592	-5.98189	-11.1541	-10.6401	1.55651			-12.6483	14.9978	22.1301	2.52223	-4.10999	-1.92234	2.78232	-0.647626	-2.17182	-11.7043	2.12251	-12.4113	-18.4721
0.596	-6.58739	-11.988	-11.486	-5.56028	-1.98729	4.31941	0.143094	12.3049	5.98098	-5.89025	-11.2614	-10.7515	1.44096			-12.7264	15.0159	22.0744	2.56294	-4.14072	-1.9957	2.81919	-0.559258	-2.26611	-11.735	2.09815	-12.4306	-18.6845
0.598	-6.66428	-12.1236	-11.5597	-5.6441	-1.92867	4.31064	0.179732	12.3114	5.97201	-5.77287	-11.3344	-10.8491	1.37747			-12.7461	14.9416	22.1138	2.59242	-4.23312	-2.08915	2.85428	-0.541506	-2.30241	-11.7697	2.13678	-12.4282	-18.798
0.6	-6.67372	-12.2762	-11.4057	-5.76565	-1.82967	4.26999	0.212534	12.303	5.98956	-5.67172	-11.3956	-10.9924	1.4404			-12.7877	14.6964	22.1533	2.63145	-4.28714	-2.17652	2.89976	-0.59171	-2.38146	-11.7803	2.16857	-12.4261	-18.8543
0.602	-6.69771	-12.3956	-11.1573	-5.87506	-1.72588	4.21112	0.271838	12.3118	5.97314	-5.63112	-11.3852	-11.1265	1.63391			-12.8496	14.3433	22.1832	2.64993	-4.35701	-2.24106	2.92282	-0.674282	-2.49469	-11.7632	2.14402	-12.4085	-18.7899
0.604	-6.75301	-12.4761	-10.7829	-5.96582	-1.6469	4.18953	0.328244	12.2375	5.98881	-5.65377	-11.2781	-11.3079	1.88468			-12.8946	14.0631	22.1348	2.69695	-4.37403	-2.29131	2.94647	-0.747348	-2.60081	-11.7324	2.11985	-12.4302	-18.5782
0.606	-6.78012	-12.5482	-10.5455	-6.04391	-1.61881	4.20977	0.409304	12.4023	5.98592	-5.69247	-11.1231	-11.455	2.09187			-12.9336	14.1485	22.0752	2.71732	-4.39863	-2.26297	2.95959	-0.86506	-2.68362	-11.7165	2.08082	-12.3857	-18.4272
0.608	-6.86262	-12.5973	-10.5385	-6.12611	-1.6925	4.26072	0.449596	12.5728	5.99683	-5.74112	-10.9899	-11.5882	2.18305			-12.9953	14.397	22.0902	2.7592	-4.41914	-2.18385	2.96638	-0.882952	-2.80003	-11.7516	2.03746	-12.3745	-18.3772
0.61	-6.93052	-12.4343	-10.6378	-6.10679	-1.79738	4.31238	0.433118	12.5081	6.04358	-5.78565	-10.8549	-11.7259	2.117			-12.9332	14.5841	22.0325	2.7532	-4.41673	-2.11627	2.96948	-0.99379	-2.86468	-11.8329	2.04583	-12.3737	-18.3606
0.612	-6.96576	-12.1913	-10.782	-6.07372	-1.94156	4.33595	0.3927	12.6329	6.11205	-5.84142	-10.7572	-11.8494	1.98338			-12.8594	14.7424	21.9929	2.75705	-4.42033	-2.08638	2.97025	-1.07762	-2.90081	-11.9318	2.02159	-12.3333	-18.3248
0.614	-6.97738	-12.0176	-10.9847	-6.01657	-2.04639	4.32764	0.300748	12.5658	6.14872	-5.92049	-10.679	-11.9909	1.8493			-12.847	14.8642	21.9774	2.73295	-4.4141	-2.10479	2.98714	-1.09015	-2.82796	-12.0836	1.98876	-12.2984	-18.2781
0.616	-6.97627	-12.0121	-11.2164	-5.8961	-2.09549	4.30441	0.192752	12.5071	6.22275	-5.99095	-10.5595	-12.1188	1.73929			-12.7923	15.0608	22.0525	2.70796	-4.36027	-2.15473	3.03139	-1.06264	-2.78456	-12.2589	1.9572	-12.2642	-18.3042
0.618	-6.92034	-12.2044	-11.4033	-5.77804	-2.08942	4.28411	0.082726	12.4356	6.28925	-6.03819	-10.4834	-12.2293	1.62039			-12.7272	15.2024	22.1263	2.67317	-4.37154	-2.21869	3.047	-1.04502	-2.69506	-12.3518	1.94088	-12.2652	-18.4969
0.62	-6.88926	-12.3804	-11.4455	-5.70006	-2.02205	4.25921	0.044478	12.2838	6.30309	-6.10007	-10.4921	-12.3104	1.54941			-12.744	15.1749	22.2356	2.64053	-4.43405	-2.28941	3.03253	-1.0078	-2.66942	-12.4208	1.92765	-12.2654	-18.7438
0.622	-6.82879	-12.5816	-11.4084	-5.60106	-1.92742	4.26255	0.06335	12.1558	6.25428	-6.14839	-10.5154	-12.3876	1.49737			-12.7666	14.9433	22.2303	2.5768	-4.49999	-2.41364	3.0254	-0.991718	-2.66976	-12.4827	1.91929	-12.2401	-19.0479
0.624	-6.85541	-12.7345	-11.2801	-5.52007	-1.79542	4.23688	0.09086	11.9829	6.17184	-6.18286	-10.5417	-12.4832	1.4177			-12.7933	14.7396	22.1978	2.47979	-4.50958	-2.51754	3.03148	-0.838838	-2.67868	-12.5263	1.92083	-12.2102	-19.2309
0.626	-6.85524	-12.8491	-11.1205	-5.46973	-1.73947	4.2237	0.125048	11.9228	6.13045	-6.1616	-10.589	-12.5777	1.39472			-12.8223	14.6145	22.166	2.49145	-4.55224	-2.5955	3.05056	-0.707756	-2.75832	-12.4985	1.91579	-12.2066	-19.3497
0.628	-6.89168	-12.9809	-10.9493	-5.41876	-1.70544	4.24883	0.19537	11.8718	6.05798	-6.13358	-10.644	-12.6737	1.37921			-12.8204	14.5811	22.0378	2.57561	-4.57461	-2.62202	3.07979	-0.573818	-2.88603	-12.4681	1.89351	-12.1963	-19.3727
0.63	-6.92303	-13.0511	-10.7955	-5.4357	-1.73421	4.24761	0.263032	11.9249	5.99077	-6.09211	-10.6696	-12.7819	1.42355			-12.8798	14.6372	21.8604	2.67711	-4.60478	-2.60924	3.11157	-0.512862	-3.02095	-12.4223	1.93255	-12.1643	-19.3705
0.632	-6.96482	-13.0728	-10.7598	-5.50316	-1.82815	4.26404	0.342748	11.9598	5.88906	-6.08948	-10.7125	-12.8566	1.46811			-12.9052	14.7314	21.8206	2.72919	-4.63175	-2.56831	3.14457	-0.464576	-3.17428	-12.4168	1.95621	-12.156	-19.2198
0.634	-7.05365	-13.0161	-10.8095	-5.5677	-1.93425	4.28107	0.375396	12.0148	5.78705	-6.11309	-10.7566	-12.9324	1.56108			-13.0041	14.9023	21.8259	2.82307	-4.6437	-2.50208	3.15736	-0.496328	-3.22991	-12.3874	2.01218	-12.1372	-19.1062
0.636	-7.1125	-12.8189	-10.9212	-5.6425	-2.05307	4.30514	0.448574	12.0472	5.74297	-6.13732	-10.8161	-13.0216	1.63334			-13.1206	15.1205	21.8502	2.86493	-4.64957	-2.43327	3.18318	-0.560518	-3.26039	-12.3559	2.01502	-12.1328	-18.9321
0.638	-7.17101	-12.6775	-11.0957	-5.72859	-2.12607	4.26301	0.534716	12.1152	5.7192	-6.14219	-10.8762	-13.1139	1.6402			-13.1722	15.3787	21.8904	2.94448	-4.63651	-2.3506	3.21224	-0.552776	-3.2776	-12.3421	1.9879	-12.126	-18.8662
0.64	-7.2183	-12.6503	-11.196	-5.78638	-2.19587	4.23335	0.608048	12.3314	5.62948	-6.11346	-10.9219	-13.2241	1.60063			-13.2416	15.573	21.9823	2.9654	-4.63879	-2.3148	3.22549	-0.575568	-3.25996	-12.319	2.05153	-12.1163	-18.8108
0.642	-7.27199	-12.7455	-11.2424	-5.85802	-2.18526	4.20414	0.68663	12.5376	5.5637	-6.09115	-10.9668	-13.2928	1.5602			-13.3583	15.601	22.0887	2.92565	-4.61782	-2.30278	3.22594	-0.632814	-3.29293	-12.3238	2.05703	-12.1149	-18.8035
0.644	-7.36989	-12.903	-11.1948	-5.93263	-2.11222	4.1907	0.688632	12.6905	5.55983	-6.05468	-11.0262	-13.3741	1.53334			-13.5409	15.4591	22.2931	2.89122	-4.6108	-2.33243	3.21798	-0.596022	-3.28129	-12.3231	2.08075	-12.0997	-18.8856
0.646	-7.48556	-13.0987	-11.0566	-5.97817	-2.00386	4.1845	0.646072	12.869	5.58316	-6.04404	-11.1024	-13.4198	1.52069			-13.6566	15.2799	22.3625	2.84682	-4.68556	-2.38123	3.19325	-0.61145	-3.27775	-12.3457	2.09692	-12.0724	-18.9648
0.648	-7.59146	-13.2026	-11.0674	-6.0243	-1.89279	4.19789	0.598374	13.1062	5.67991	-6.04345	-11.1756	-13.5717	1.45834			-13.8719	15.1982	22.4259	2.81035	-4.71393	-2.44782	3.18654	-0.601566	-3.21342	-12.3591	2.11487	-12.1081	-19.0716
0.65	-7.70841	-13.3657	-11.2392	-6.02732	-1.82983	4.2182	0.563794	13.3364	5.80241	-6.02427	-11.2434	-13.6571	1.44028			-14.0626	15.1221	22.4282	2.73897	-4.76699	-2.51017	3.17169	-0.634928	-3.16316	-12.3845	2.13343	-12.1929	-19.2
0.652	-7.86857	-13.4745	-11.3971	-6.07048	-1.78711	4.24949	0.55643	13.5891	5.93327	-6.03133	-11.3421	-13.6787	1.43809			-14.3026	14.9582	22.3893	2.67497	-4.79475	-2.58899	3.13338	-0.63588	-3.13853	-12.465	2.14708	-12.2638	-19.3297
0.654	-7.99126	-13.5812	-11.5374	-6.0695	-1.79648	4.28753	0.510804	13.8164	6.03233	-6.05438	-11.3877	-13.6109	1.44805			-14.5547	14.928	22.3026	2.65483	-4.78764	-2.64884	3.09862	-0.649068	-3.08598	-12.5733	2.16705	-12.3978	-19.4288
0.656	-8.19482	-13.6048	-11.7909	-5.9864	-1.87152	4.32484	0.473718	14.0041	6.04206	-6.05424	-11.4612	-13.5289	1.50086			-14.8293	15.133	22.2459	2.65549	-4.76822	-2.71669	3.08363	-0.650846	-3.03251	-12.6504	2.19778	-12.5631	-19.4868
0.658	-8.34456	-13.5621	-12.0438	-5.84655	-2.03967	4.39226	0.473452	14.1358	5.99144	-6.05528	-11.532	-13.5373	1.55051			-15.0997	15.4242	22.3072	2.75776	-4.76456	-2.7904	3.08414	-0.678454	-3.00103	-12.7319	2.22405	-12.6444	-19.4723
0.66	-8.44066	-13.3896	-12.1408	-5.70745	-2.15961	4.46741	0.455224	14.232	5.94329	-6.09482	-11.6237	-13.4396	1.60765			-15.2495	15.7073	22.4095	2.85118	-4.76616	-2.83989	3.10568	-0.718424	-3.03474	-12.764	2.24175	-12.5692	-19.3675
0.662	-8.51662	-13.2278	-12.1193	-5.5665	-2.22585	4.52633	0.483308	14.1751	5.90395	-6.14828	-11.7249	-13.305	1.60035			-15.377	15.8592	22.4854	2.9591	-4.75258	-2.87287	3.1375	-0.782152	-3.07073	-12.762	2.28962	-12.4391	-19.3706
0.664	-8.51796	-13.1175	-12.0082	-5.4846	-2.25967	4.51609	0.519554	14.1103	5.84963	-6.2181	-11.8002	-13.4416	1.56086			-15.4181	15.9287	22.529	3.12207	-4.74295	-2.86882	3.15763	-0.792988	-3.13174	-12.713	2.27102	-12.2424	-19.4616
0.666	-8.50567	-13.2132	-11.7374	-5.51702	-2.18798	4.45631	0.55608	14.0472	5.8021	-6.30416	-11.8987	-13.6384	1.44708			-15.3817	15.9037	22.5384	3.22475	-4.79608	-2.82233	3.19714	-0.7315	-3.20614	-12.7102	2.28904	-12.1228	-19.5721
0.668	-8.4888	-13.3901	-11.4976	-5.57038	-2.07738	4.36348	0.572222	13.9207	5.77116	-6.31623	-11.9501	-13.9399	1.29842			-15.2779	15.8934	22.4433	3.2579	-4.93473	-2.81576	3.24579	-0.707266	-3.26039	-12.703	2.27331	-11.9823	-19.6851
0.67	-8.48511	-13.5935	-11.3771	-5.71334	-2.00063	4.26565	0.55951	13.7399	5.73835	-6.32743	-12.0556	-14.1987	1.16714			-15.204	15.8462	22.3896	3.26334	-5.02177	-2.83478	3.29812	-0.59059	-3.33859	-12.7162	2.2897	-11.8688	-19.7323
0.672	-8.46488	-13.6767	-11.3738	-5.85693	-1.90138	4.23198	0.546056	13.5947	5.70017	-6.27404	-12.1032	-14.4179	1.0424			-15.0672	15.5713	22.3075	3.27389	-5.07958	-2.86502	3.32398	-0.499002	-3.38972	-12.7036	2.31703	-11.7686	-19.8136
0.674	-8.46822	-13.7976	-11.4505	-5.97342	-1.78864	4.2404	0.534772	13.5013	5.67794	-6.21369	-12.1702	-14.5838	0.943348			-14.9134	15.3162	22.2918	3.26645	-5.10385	-2.86164	3.34032	-0.367318	-3.43776	-12.7107	2.34623	-11.6771	-19.8382
0.676	-8.53019	-13.9202	-11.6987	-6.09626	-1.70937	4.2644	0.517034	13.5538	5.6712	-6.13382	-12.2374	-14.6259	0.933884			-14.7967	15.119	22.3506	3.24981	-5.13225	-2.86203	3.32804	-0.275002	-3.51695	-12.7053	2.35656	-11.5372	-19.8784
0.678	-8.62316	-14.0135	-11.9885	-6.18773	-1.71742	4.28877	0.52066	13.627	5.63303	-6.07328	-12.3175	-14.651	0.975478			-14.7434	15.1449	22.5096	3.2152	-5.10975	-2.86306	3.28135	-0.258664	-3.56768	-12.6879	2.38794	-11.456	-19.8331
0.68	-8.66505	-14.0583	-12.1557	-6.23728	-1.78356	4.31745	0.550494	13.5948	5.61791	-6.07099	-12.393	-14.6467	1.0696			-14.7174	15.3963	22.5988	3.15855	-5.1119	-2.89027	3.24932	-0.329756	-3.64463	-12.6392	2.3983	-11.4104	-19.7838
0.682	-8.65959	-14.0504	-12.2612	-6.25444	-1.89115	4.36388	0.607698	13.5763	5.61351	-6.09451	-12.4649	-14.6523	1.08917			-14.6726	15.6156	22.7976	3.11787	-5.09846	-2.89262	3.23033	-0.491582	-3.71375	-12.622	2.42924	-11.3738	-19.8106
0.684	-8.59012	-13.9232	-12.3741	-6.24785	-2.04743	4.45581	0.647416	13.6776	5.58824	-6.11899	-12.5278	-14.5995	1.11861			-14.6225	15.7358	23.0772	3.07248	-5.10213	-2.95603	3.23595	-0.547652	-3.79996	-12.6306	2.43963	-11.4595	-19.8924
0.686	-8.56051	-13.7011	-12.4457	-6.1959	-2.12926	4.53919	0.6482	13.8337	5.56706	-6.12942	-12.5977	-14.526	1.1289			-14.6215	15.797	23.2428	3.08542	-5.08431	-2.98602	3.25279	-0.561274	-3.89299	-12.6717	2.448	-11.587	-20.0444
0.688	-8.56345	-13.4996	-12.5449	-6.12279	-2.18432	4.60328	0.645974	14.1	5.54138	-6.1426	-12.6569	-14.3144	1.20002			-14.6734	15.9304	23.243	3.0898	-5.05462	-3.03237	3.26521	-0.556388	-3.99532	-12.7026	2.47304	-11.7495	-20.185
0.69	-8.62932	-13.3784	-12.5681	-5.97541	-2.18911	4.59389	0.623126	14.3184	5.51856	-6.14222	-12.7345	-14.0951	1.35803			-14.8511	16.0687	23.1448	3.16449	-5.08141	-3.06559	3.3131	-0.524846	-4.05535	-12.7481	2.47096	-11.8795	-20.3269
0.692	-8.66387	-13.5316	-12.6649	-5.78407	-2.12488	4.49008	0.60858	14.4899	5.50431	-6.16281	-12.7868	-13.8162	1.55397			-15.0272	16.0607	22.991	3.29822	-5.13873	-3.12781	3.33862	-0.568106	-4.1757	-12.8	2.49311	-11.924	-20.4477
0.694	-8.70629	-13.7867	-12.7502	-5.63086	-2.01082	4.39061	0.560392	14.5207	5.49433	-6.17393	-12.8346	-13.5919	1.70335			-15.2177	16.0456	22.7968	3.46636	-5.18055	-3.19451	3.37715	-0.66591	-4.26752	-12.8441	2.52155	-11.9259	-20.5166
0.696	-8.76701	-14.0605	-12.8416	-5.60571	-1.95651	4.3329	0.518924	14.6529	5.44893	-6.2117	-12.9135	-13.5549	1.78674			-15.4435	15.9598	22.685	3.53193	-5.25522	-3.27173	3.42705	-0.680288	-4.33847	-12.8854	2.52206	-11.8636	-20.5424
0.698	-8.83294	-14.289	-12.9462	-5.6461	-1.83907	4.31823	0.508704	14.5615	5.41558	-6.28543	-13.0067	-13.5666	1.71643			-15.7559	15.9549	22.6286	3.55198	-5.27264	-3.35983	3.4579	-0.715022	-4.42597	-12.9529	2.53123	-11.8195	-20.4937
0.7	-8.93603	-14.501	-12.9451	-5.70258	-1.82088	4.35488	0.50463	14.6099	5.41365	-6.39247	-13.0899	-13.5804	1.52153			-16.0412	15.9637	22.693	3.53703	-5.2976	-3.39912	3.49513	-0.729288	-4.53165	-13.0117	2.54908	-11.8703	-20.3059
0.702	-9.05204	-14.6779	-12.8293	-5.77069	-1.83718	4.41154	0.521822	14.5664	5.39939	-6.45744	-13.1675	-13.6012	1.27217			-16.3267	15.9686	22.767	3.47336	-5.33625	-3.37277	3.50122	-0.663348	-4.59477	-13.0703	2.54496	-11.8895	-20.0303
0.704	-9.11299	-14.7759	-12.499	-5.87812	-1.92711	4.48581	0.548282	14.4695	5.43802	-6.48053	-13.1742	-13.5847	1.07638			-16.5538	15.9934	22.7667	3.40078	-5.35462	-3.32612	3.48372	-0.609154	-4.68157	-13.106	2.49949	-11.9352	-19.9607
0.706	-9.11641	-14.62	-12.1432	-6.02676	-2.03162	4.56421	0.623252	14.3906	5.45199	-6.49264	-13.1288	-13.6537	0.925498			-16.6827	16.0437	22.789	3.3389	-5.36036	-3.28104	3.46422	-0.500052	-4.71419	-13.1325	2.38533	-11.9723	-19.9621
0.708	-9.0461	-14.3557	-11.9184	-6.13949	-2.12381	4.65256	0.710472	14.3572	5.50701	-6.47609	-13.1214	-13.7303	0.865536			-16.8256	16.2126	22.7398	3.29895	-5.3629	-3.28261	3.44674	-0.298242	-4.70952	-13.1622	2.2399	-11.9297	-19.9839
0.71	-8.99077	-14.0465	-11.8027	-6.21306	-2.21126	4.6809	0.777476	14.3308	5.58103	-6.43143	-13.0774	-13.8346	0.915194			-16.8721	16.317	22.6868	3.23847	-5.36287	-3.27125	3.45131	-0.199626	-4.64981	-13.1618	2.11946	-11.9451	-20.0029
0.712	-8.89328	-13.8667	-11.7496	-6.26395	-2.26022	4.62437	0.825678	14.3487	5.65249	-6.40346	-13.0028	-13.9579	1.00999			-16.8571	16.4572	22.6142	3.21175	-5.34712	-3.27671	3.4635	-0.145656	-4.61293	-13.1763	2.07642	-11.9081	-19.9446
0.714	-8.80099	-13.8618	-11.7127	-6.27113	-2.24883	4.47677	0.818832	14.3083	5.69472	-6.39395	-12.9363	-14.1075	1.05815			-16.7722	16.5211	22.4905	3.16968	-5.35615	-3.3145	3.47795	-0.135464	-4.56932	-13.1778	2.14022	-11.8663	-19.9517
0.716	-8.83026	-14.0431	-11.6637	-6.24092	-2.15018	4.37563	0.817992	14.2753	5.69428	-6.39363	-12.9194	-14.2602	1.12308			-16.6501	16.5231	22.4408	3.18048	-5.38692	-3.38871	3.50937	-0.133658	-4.56095	-13.1575	2.22604	-11.8207	-20.0319
0.718	-8.93577	-14.2872	-11.8218	-6.13964	-2.02688	4.29708	0.762594	14.2641	5.68778	-6.41619	-12.9897	-14.4796	1.27196			-16.5125	16.5532	22.459	3.24127	-5.40357	-3.46808	3.53633	-0.175476	-4.45945	-13.1372	2.34165	-11.7029	-20.1427
0.72	-9.04663	-14.5447	-12.0348	-5.9803	-1.94964	4.2694	0.66122	14.4185	5.64199	-6.41672	-13.0903	-14.6532	1.41225			-16.4691	16.639	22.5576	3.3476	-5.42185	-3.51344	3.56423	-0.20741	-4.43688	-13.1292	2.45339	-11.6578	-20.2845
0.722	-9.10342	-14.7444	-12.2937	-5.81469	-1.88012	4.35761	0.5705	14.5407	5.55454	-6.42037	-13.1899	-14.763	1.58782			-16.3996	16.6207	22.6779	3.47743	-5.42233	-3.50571	3.58054	-0.291116	-4.43838	-13.1294	2.56498	-11.5923	-20.5093
0.724	-9.12562	-14.9144	-12.5149	-5.65342	-1.89064	4.44958	0.536956	14.703	5.40095	-6.44111	-13.2546	-14.9287	1.70232			-16.4435	16.4393	22.8634	3.58019	-5.46532	-3.45631	3.61761	-0.447146	-4.45497	-13.1351	2.65888	-11.4915	-20.6641
0.726	-9.16272	-15.0396	-12.6535	-5.5274	-1.91744	4.53425	0.506646	14.6693	5.27762	-6.44027	-13.3455	-15.0609	1.76856			-16.5716	16.2883	22.9053	3.64475	-5.44333	-3.38416	3.63149	-0.59717	-4.46922	-13.1334	2.78516	-11.4429	-20.78
0.728	-9.24426	-15.0641	-12.6584	-5.50165	-1.95828	4.60194	0.515536	14.7637	5.15043	-6.4223	-13.4335	-15.1724	1.74769			-16.764	16.2765	22.8772	3.61784	-5.42569	-3.37002	3.62235	-0.66689	-4.51464	-13.1166	2.90625	-11.4043	-20.7573
0.73	-9.30171	-14.9479	-12.6951	-5.48467	-2.03734	4.62239	0.582302	14.7497	5.05418	-6.42792	-13.4803	-15.2592	1.6268			-17.0089	16.439	22.8734	3.57137	-5.50945	-3.36365	3.62106	-0.694456	-4.49413	-13.118	3.0156	-11.3784	-20.6051
0.732	-9.33947	-14.694	-12.6518	-5.44209	-2.10799	4.54369	0.638078	14.7071	4.98078	-6.41396	-13.5248	-15.3539	1.41396			-17.2404	16.5566	22.9117	3.542	-5.53528	-3.36673	3.62502	-0.716492	-4.47408	-13.1213	3.12537	-11.3515	-20.3779
0.734	-9.3813	-14.3924	-12.5228	-5.5019	-2.19246	4.40282	0.708694	14.5912	4.89048	-6.4099	-13.5767	-15.4185	1.14352			-17.568	16.5664	22.9034	3.50664	-5.5616	-3.38891	3.63495	-0.735938	-4.47685	-13.1326	3.24398	-11.3034	-20.2254
0.736	-9.42577	-14.185	-12.365	-5.62113	-2.25485	4.28932	0.80199	14.472	4.8564	-6.42533	-13.6405	-15.4802	0.996688			-17.7797	16.5305	22.8285	3.45307	-5.56633	-3.46128	3.63133	-0.680008	-4.4506	-13.1384	3.33585	-11.2723	-20.1904
0.738	-9.49854	-14.0733	-12.2847	-5.79582	-2.30803	4.1921	0.88963	14.3917	4.81919	-6.44438	-13.6978	-15.5264	0.951398			-17.9951	16.4826	22.7335	3.4182	-5.51541	-3.52769	3.63339	-0.565614	-4.47156	-13.1343	3.35269	-11.2507	-20.1865
0.74	-9.54796	-14.0428	-12.2002	-5.93951	-2.31097	4.15815	0.974848	14.35	4.81572	-6.46148	-13.6919	-15.7551	0.985782			-18.2265	16.5557	22.6004	3.4054	-5.52297	-3.59797	3.63084	-0.504784	-4.46324	-13.1321	3.38297	-11.156	-20.1414
0.742	-9.61099	-14.1656	-12.1857	-6.01976	-2.29293	4.20375	1.04233	14.2719	4.90641	-6.45564	-13.6458	-15.7704	1.05027			-18.5201	16.7831	22.5148	3.41811	-5.50757	-3.62699	3.61922	-0.403018	-4.47576	-13.1627	3.28279	-11.1794	-20.1153
0.744	-9.61418	-14.3802	-12.2036	-6.08857	-2.22625	4.30469	1.05822	14.4349	5.02877	-6.44886	-13.5899	-15.8395	1.15056			-18.7724	16.9368	22.4693	3.41076	-5.52544	-3.60007	3.61043	-0.367136	-4.45668	-13.2061	3.17755	-11.1457	-20.2256
0.746	-9.59083	-14.6361	-12.2133	-6.08293	-2.13186	4.39298	0.958944	14.4725	5.12364	-6.4344	-13.5488	-15.8869	1.29902			-18.8463	16.9401	22.5082	3.38114	-5.55513	-3.5285	3.62589	-0.246974	-4.46897	-13.2798	3.01588	-11.1413	-20.3454
0.748	-9.52148	-14.9263	-12.1267	-6.01416	-2.03433	4.47003	0.81921	14.4716	5.17331	-6.41816	-13.5005	-15.9365	1.45725			-18.8916	16.8238	22.5581	3.37915	-5.54708	-3.49633	3.66615	-0.193466	-4.4624	-13.34	2.8631	-11.1014	-20.4487
0.75	-9.46858	-15.1911	-12.0023	-5.95704	-2.01919	4.49337	0.738444	14.4615	5.24749	-6.39467	-13.3736	-16.043	1.6308			-18.8878	16.7789	22.6804	3.45162	-5.5407	-3.49978	3.72425	-0.181762	-4.40922	-13.4007	2.68297	-11.1031	-20.5762
0.752	-9.40024	-15.3343	-11.8495	-5.85031	-2.02388	4.44777	0.675248	14.4182	5.26788	-6.38313	-13.1765	-16.1689	1.78962			-18.7758	16.814	22.7695	3.53151	-5.53193	-3.52915	3.76838	-0.12313	-4.37161	-13.4596	2.54337	-11.0893	-20.6571
0.754	-9.36958	-15.2827	-11.775	-5.74043	-2.07057	4.39986	0.653478	14.4937	5.23249	-6.37462	-13.0598	-16.2842	1.88224			-18.6396	16.8508	22.8032	3.57017	-5.57214	-3.58721	3.76685	-0.119812	-4.32909	-13.4926	2.49564	-10.9922	-20.7509
0.756	-9.41577	-15.164	-11.7749	-5.64607	-2.09329	4.32912	0.694638	14.5712	5.2248	-6.42954	-13.0169	-16.4327	1.7082			-18.4611	16.7687	22.8011	3.56406	-5.59901	-3.65084	3.74639	-0.162176	-4.3294	-13.5082	2.52378	-10.9438	-20.7493
0.758	-9.54541	-14.9136	-11.9268	-5.56221	-2.15936	4.2372	0.768026	14.8117	5.20691	-6.50868	-13.0481	-16.5823	1.43123			-18.3766	16.6638	22.8128	3.52407	-5.64434	-3.7372	3.74277	-0.151354	-4.29118	-13.497	2.55777	-10.9228	-20.6637
0.76	-9.58783	-14.626	-12.0828	-5.52159	-2.21626	4.17	0.865074	14.9193	5.1603	-6.58984	-13.0992	-16.6823	1.15389			-18.3379	16.7006	22.8707	3.52682	-5.69107	-3.8222	3.756	-0.1673	-4.29734	-13.5042	2.60875	-10.9644	-20.5728
0.762	-9.57838	-14.4087	-12.2701	-5.53092	-2.24088	4.12027	0.970074	15.0861	5.1387	-6.65021	-13.1457	-16.7438	0.981232			-18.4218	16.697	22.9512	3.52759	-5.7048	-3.89701	3.75407	-0.285502	-4.31612	-13.5101	2.65553	-11.0694	-20.6184
0.764	-9.55692	-14.224	-12.4633	-5.54775	-2.29709	4.12852	1.04426	15.1273	5.10308	-6.70211	-13.2003	-16.7331	0.876134			-18.655	16.6954	22.9793	3.49434	-5.70521	-3.95181	3.7569	-0.428946	-4.34283	-13.5079	2.72451	-11.1879	-20.6096
0.766	-9.5696	-14.0926	-12.6392	-5.59712	-2.31143	4.19803	1.102	15.1468	5.07214	-6.73547	-13.2535	-16.6871	0.884478			-18.8379	16.578	23.1087	3.51235	-5.73952	-3.94373	3.74709	-0.540078	-4.33189	-13.492	2.80087	-11.2649	-20.612
0.768	-9.59318	-14.0783	-12.7722	-5.6959	-2.292	4.29117	1.12633	15.1025	5.09804	-6.78027	-13.3192	-16.6369	0.99701			-19.0885	16.4885	23.1892	3.4999	-5.77247	-3.88052	3.73313	-0.547036	-4.37058	-13.4858	2.89467	-11.2253	-20.542
0.77	-9.64491	-14.1578	-12.9058	-5.77002	-2.21029	4.34549	1.0324	15.0207	5.03534	-6.80134	-13.4089	-16.5941	1.17499			-19.3771	16.6034	23.3141	3.49796	-5.76811	-3.79305	3.76142	-0.495754	-4.37563	-13.486	2.9303	-11.1155	-20.4733
0.772	-9.70308	-14.3341	-12.9657	-5.84696	-2.16238	4.37776	0.9016	14.8195	5.01631	-6.79962	-13.4913	-16.6403	1.3774			-19.6418	16.836	23.3927	3.51995	-5.79998	-3.7569	3.79043	-0.449204	-4.40367	-13.5054	3.05598	-10.9292	-20.4083
0.774	-9.77021	-14.6324	-12.8467	-5.95738	-2.11984	4.34224	0.757596	14.8277	5.00186	-6.77125	-13.5636	-16.7462	1.55414			-19.8978	17.0986	23.4109	3.53396	-5.80996	-3.74023	3.82738	-0.34426	-4.41388	-13.5462	3.12346	-10.6663	-20.4119
0.776	-9.84574	-14.8592	-12.6412	-6.08335	-2.14129	4.29433	0.700168	14.8936	5.01848	-6.78045	-13.6569	-16.8337	1.70548			-20.2598	17.1859	23.3474	3.57412	-5.82077	-3.79642	3.87456	-0.24339	-4.46221	-13.5881	3.21847	-10.4497	-20.5016
0.778	-9.93331	-15.0028	-12.4033	-6.22751	-2.19708	4.24192	0.659106	14.9426	5.00354	-6.75534	-13.6984	-16.8413	1.81489			-20.595	17.3248	23.2762	3.59223	-5.80534	-3.87598	3.88025	-0.157542	-4.49252	-13.616	3.27935	-10.3405	-20.5664
0.78	-10.0134	-15.0579	-12.2407	-6.3806	-2.26362	4.19111	0.69069	15.1776	4.96786	-6.72552	-13.7707	-16.7864	1.77479			-20.944	17.5616	23.102	3.6365	-5.84241	-3.96731	3.86642	-0.165284	-4.51394	-13.6318	3.37728	-10.276	-20.6016
0.782	-10.0898	-15.0536	-12.1896	-6.52305	-2.32166	4.12553	0.748902	15.3447	4.95207	-6.64917	-13.8436	-16.7475	1.56559			-21.2331	17.7469	22.9643	3.68703	-5.8659	-4.07277	3.87306	-0.118832	-4.55004	-13.6101	3.45815	-10.2912	-20.6536
0.784	-10.0863	-15.1301	-12.1311	-6.6596	-2.39211	4.05959	0.830438	15.4922	4.95424	-6.62584	-13.8884	-16.6876	1.29826			-21.4166	17.8223	22.8773	3.74899	-5.90818	-4.15505	3.87932	-0.067998	-4.57101	-13.616	3.53562	-10.3998	-20.6182
0.786	-10.0333	-15.256	-12.0765	-6.80925	-2.46548	4.0329	0.931364	15.6239	4.9156	-6.60286	-13.9271	-16.5689	1.07761			-21.3548	17.7128	22.7947	3.80064	-5.96733	-4.23493	3.88678	-0.042798	-4.61541	-13.6501	3.58912	-10.5785	-20.614
0.788	-9.98344	-15.4051	-12.0494	-6.95969	-2.52252	4.0396	1.02211	15.7926	4.91291	-6.60748	-13.938	-16.4784	0.906906			-21.278	17.5362	22.922	3.85365	-6.02827	-4.27487	3.87898	-0.008498	-4.68542	-13.686	3.65438	-10.7988	-20.6283
0.79	-9.90982	-15.5993	-12.0363	-7.09038	-2.52424	4.09917	1.0838	15.9175	4.83839	-6.59844	-13.9819	-16.4021	0.876008			-21.1306	17.3752	23.1051	3.90548	-6.02785	-4.24042	3.87937	0.007532	-4.71509	-13.6919	3.67816	-11.0909	-20.5772
0.792	-9.90578	-15.7969	-11.9659	-7.21939	-2.50188	4.18716	1.11978	16.1404	4.81846	-6.6212	-14.034	-16.2989	0.93247			-21.0034	17.325	23.276	3.97424	-6.06078	-4.17624	3.88979	0.107156	-4.76449	-13.7183	3.73205	-11.2359	-20.5042
0.794	-9.93237	-15.9961	-11.9326	-7.35368	-2.47789	4.2568	1.09444	16.3254	4.812	-6.67806	-14.0534	-16.2238	1.11208			-20.8419	17.3144	23.3821	4.09179	-6.09547	-4.12227	3.92456	0.138586	-4.8181	-13.7638	3.80505	-11.2409	-20.4046
0.796	-9.91008	-16.1526	-11.8823	-7.47888	-2.46312	4.27976	0.998368	16.5196	4.77261	-6.74738	-14.092	-16.2478	1.30347			-20.6761	17.2556	23.3966	4.16542	-6.11817	-4.11846	3.96721	0.169652	-4.86469	-13.7952	3.855	-11.1379	-20.4004
0.798	-9.83016	-16.1971	-11.7811	-7.63682	-2.42802	4.25058	0.88333	16.744	4.73235	-6.80656	-14.1168	-16.2966	1.48728			-20.5712	17.2726	23.3237	4.19251	-6.11027	-4.14413	4.01384	0.178332	-4.8872	-13.8345	3.96253	-11.041	-20.4594
0.8	-9.70682	-16.1214	-11.8073	-7.78907	-2.45882	4.22853	0.841778	16.9066	4.6895	-6.86035	-14.1697	-16.4074	1.68378			-20.5926	17.438	23.2878	4.20529	-6.03912	-4.21298	4.05663	0.19971	-4.97319	-13.8249	3.97582	-10.8797	-20.535
0.802	-9.60273	-15.972	-11.8911	-7.90345	-2.5242	4.1915	0.830298	16.8806	4.66546	-6.90917	-14.2432	-16.4997	1.84006			-20.733	17.6833	23.2771	4.20346	-5.95764	-4.27892	4.07011	0.206626	-5.00846	-13.8468	3.98741	-10.7811	-20.6065
0.804	-9.58364	-15.8351	-11.9659	-8.01151	-2.543	4.13514	0.85001	16.8794	4.61157	-6.92514	-14.3232	-16.6061	1.93039			-20.9907	17.8963	23.2573	4.20406	-5.95119	-4.35067	4.07198	0.171108	-5.05267	-13.8441	3.99748	-10.7189	-20.6647
0.806	-9.59762	-15.7531	-12.0549	-8.07353	-2.59727	4.05063	0.915796	16.886	4.539	-6.96644	-14.362	-16.7062	1.89158			-21.2965	18.0058	23.2666	4.17108	-5.91772	-4.41697	4.05167	0.197428	-5.0783	-13.9029	3.95644	-10.6059	-20.7555
0.808	-9.63228	-15.8209	-12.2274	-8.1415	-2.64216	3.96543	1.0094	16.7954	4.49334	-6.97519	-14.424	-16.7887	1.67035			-21.689	17.9736	23.2558	4.10861	-5.9515	-4.4465	4.05398	0.185906	-5.14263	-13.9497	3.91567	-10.5298	-20.7147
0.81	-9.66003	-16.052	-12.4257	-8.17088	-2.63243	3.87702	1.10016	16.6498	4.46117	-6.93473	-14.5089	-16.9149	1.36781			-22.0118	17.9335	23.2905	4.05279	-5.99941	-4.46943	4.06182	0.255654	-5.16358	-13.952	3.8834	-10.4678	-20.6682
0.812	-9.69951	-16.3538	-12.5782	-8.19753	-2.64394	3.82925	1.17907	16.5083	4.39627	-6.90007	-14.5058	-17.0118	1.13583			-22.4356	17.9706	23.3721	3.97278	-6.09304	-4.48469	4.05364	0.307664	-5.21466	-13.9603	3.81774	-10.386	-20.6794
0.814	-9.73402	-16.6383	-12.7203	-8.20492	-2.64047	3.86681	1.24873	16.3997	4.3535	-6.87463	-14.3841	-17.1125	0.99729			-22.7383	17.9901	23.4775	3.98322	-6.20693	-4.45857	4.05892	0.401114	-5.24147	-13.9629	3.75288	-10.3057	-20.6468
0.816	-9.72565	-16.9201	-12.8549	-8.23757	-2.56689	3.95906	1.2892	16.4415	4.31376	-6.86867	-14.1811	-17.209	0.984354			-22.9334	17.8308	23.5461	4.01402	-6.25636	-4.43034	4.06256	0.51128	-5.28928	-13.9668	3.79406	-10.2387	-20.6213
0.818	-9.6903	-17.076	-12.9661	-8.30382	-2.55053	4.02469	1.25775	16.4326	4.28561	-6.87628	-14.0353	-17.3201	1.10916			-22.932	17.642	23.5347	4.04557	-6.23836	-4.39653	4.08069	0.5502	-5.29029	-13.9561	3.83239	-10.1292	-20.594
0.82	-9.62853	-17.1444	-13.0944	-8.37235	-2.5562	4.05938	1.13799	16.4207	4.2187	-6.86144	-13.8859	-17.4595	1.28989			-22.8433	17.5563	23.437	4.09983	-6.22342	-4.40199	4.10915	0.593502	-5.33316	-13.9212	3.86277	-10.0207	-20.5693
0.822	-9.61821	-17.0954	-13.3173	-8.4597	-2.57354	4.04436	1.03573	16.3537	4.20756	-6.83851	-13.8113	-17.587	1.42492			-22.7067	17.6711	23.2306	4.1805	-6.14335	-4.43586	4.13584	0.656726	-5.37229	-13.8891	3.90165	-9.95133	-20.5129
0.824	-9.5811	-16.8949	-13.6992	-8.54035	-2.59617	4.00329	0.946568	16.3781	4.1596	-6.82433	-13.7603	-17.7279	1.59722			-22.5834	17.8772	23.0748	4.26957	-6.07152	-4.49121	4.17227	0.701624	-5.41453	-13.8416	3.82703	-9.86028	-20.5042
0.826	-9.57513	-16.6306	-14.1243	-8.59268	-2.63778	3.96533	0.918316	16.3668	4.09934	-6.81122	-13.778	-17.8581	1.76327			-22.4848	18.0521	23.0249	4.33628	-6.06805	-4.56019	4.18158	0.651686	-5.44408	-13.812	3.77591	-9.70659	-20.5022
0.828	-9.64141	-16.4921	-14.6106	-8.68256	-2.63708	3.90345	0.938714	16.3897	4.04954	-6.81446	-13.8362	-18.0187	1.86092			-22.3287	18.078	23.0256	4.42705	-6.09844	-4.61282	4.1824	0.551782	-5.48058	-13.7983	3.75816	-9.59451	-20.4964
0.83	-9.71904	-16.393	-14.9149	-8.74315	-2.62706	3.82351	0.9849	16.4859	4.0287	-6.82249	-13.9076	-18.1086	1.72665			-22.1404	18.0622	23.0472	4.47742	-6.13781	-4.68143	4.17875	0.451976	-5.51172	-13.8164	3.79463	-9.47419	-20.5659
0.832	-9.78466	-16.3584	-15.096	-8.82834	-2.58873	3.77373	1.06438	16.599	3.96116	-6.8272	-14.001	-18.2104	1.47427			-22.0315	18.0917	23.0345	4.47227	-6.21039	-4.76542	4.20042	0.310394	-5.55625	-13.8174	3.83488	-9.38181	-20.5641
0.834	-9.74204	-16.4123	-15.0576	-8.91507	-2.55893	3.72961	1.16759	16.6704	3.92643	-6.83607	-14.0965	-18.3065	1.23546			-21.8353	18.1871	23.0113	4.43386	-6.30494	-4.81806	4.2134	0.252042	-5.6135	-13.8235	3.95123	-9.30818	-20.6141
0.836	-9.66098	-16.7246	-14.8568	-9.01159	-2.56763	3.73472	1.26056	16.6816	3.85732	-6.87376	-14.1529	-18.4062	1.04509			-21.6318	18.2208	23.0425	4.38306	-6.39614	-4.83701	4.22573	0.177926	-5.68695	-13.858	4.05601	-9.2267	-20.6755
0.838	-9.55016	-17.047	-14.7165	-9.09709	-2.57907	3.74632	1.31646	16.6445	3.83552	-6.88253	-14.2041	-18.5536	0.910434			-21.4723	18.1601	23.1098	4.27987	-6.47238	-4.8398	4.21592	0.154238	-5.74455	-13.8882	4.13147	-9.10567	-20.7406
0.84	-9.47995	-17.3953	-14.6196	-9.15678	-2.53121	3.76974	1.34212	16.4405	3.75166	-6.8941	-14.2802	-18.6805	0.872676			-21.5091	18.0563	23.1298	4.20036	-6.57023	-4.79315	4.20308	0.211862	-5.77328	-13.9238	4.23118	-9.03564	-20.7463
0.842	-9.43054	-17.7719	-14.5827	-9.18358	-2.48195	3.8292	1.27789	16.264	3.72198	-6.91355	-14.3441	-18.8253	0.965034			-21.6767	18.1002	23.0997	4.12276	-6.5961	-4.7179	4.20406	0.287308	-5.8511	-13.9584	4.31523	-8.92272	-20.7049
0.844	-9.41007	-17.9774	-14.6371	-9.18313	-2.47379	3.85234	1.12878	16.344	3.71792	-6.92867	-14.4218	-18.9961	1.10792			-21.9128	18.2017	23.0587	4.0752	-6.6057	-4.67062	4.22118	0.410354	-5.92768	-13.9844	4.42722	-8.85199	-20.6056
0.846	-9.39491	-17.9409	-14.8678	-9.13674	-2.46824	3.81931	1.01581	16.4244	3.78692	-6.94484	-14.4216	-19.1723	1.2427			-22.1918	18.2992	22.9717	4.02546	-6.57663	-4.64258	4.26212	0.413182	-5.93538	-14.0098	4.50743	-8.75601	-20.475
0.848	-9.33065	-17.7976	-15.2503	-9.03827	-2.52153	3.77922	0.932148	16.6023	3.84615	-6.96111	-14.4789	-19.2808	1.37606			-22.4438	18.2212	22.8948	4.01064	-6.50692	-4.63435	4.30331	0.499072	-5.90549	-14.0389	4.57764	-8.74471	-20.3903
0.85	-9.28112	-17.6478	-15.6986	-8.99875	-2.59154	3.72828	0.901488	16.7689	3.97436	-6.96669	-14.4848	-19.384	1.49456			-22.6369	18.2133	22.7928	4.02427	-6.42471	-4.66019	4.3007	0.570136	-5.90029	-14.0746	4.665	-8.76075	-20.3036
0.852	-9.17645	-17.4337	-16.1156	-8.94002	-2.64481	3.70149	0.940758	16.9363	4.03585	-6.95264	-14.5097	-19.3568	1.58739			-22.8144	18.2166	22.7084	4.03332	-6.37843	-4.71965	4.27612	0.652918	-5.89803	-14.0878	4.69148	-8.80359	-20.2731
0.854	-9.12779	-17.2565	-16.4505	-8.81957	-2.58311	3.69575	1.00187	17.1599	4.0683	-6.92328	-14.5768	-19.2075	1.59876			-22.9691	18.2722	22.6142	3.96813	-6.39407	-4.82479	4.28967	0.758492	-5.88805	-14.0713	4.75205	-8.87254	-20.3308
0.856	-9.05964	-17.1604	-16.6262	-8.73901	-2.54096	3.68885	1.07187	17.3054	4.05656	-6.88694	-14.6125	-18.9527	1.53377			-22.9908	18.2929	22.5029	3.89988	-6.47314	-4.92449	4.31385	0.81494	-5.8452	-13.9989	4.82664	-9.00399	-20.5341
0.858	-9.08643	-17.0599	-16.6981	-8.74712	-2.49963	3.6874	1.1901	17.3993	3.93478	-6.87988	-14.651	-18.617	1.36493			-22.9428	18.2255	22.462	3.80871	-6.51609	-5.0427	4.33658	0.817908	-5.8344	-13.9869	4.90767	-9.08342	-20.611
0.86	-9.13599	-17.1013	-16.5349	-8.73279	-2.48293	3.70322	1.28591	17.613	3.84479	-6.88397	-14.7142	-18.2118	1.16203			-22.8204	18.1441	22.5324	3.80068	-6.5703	-5.15257	4.35011	0.916692	-5.84168	-13.989	4.99202	-9.09164	-20.6523
0.862	-9.28334	-17.1672	-16.3184	-8.73753	-2.4456	3.75735	1.35675	17.7521	3.69293	-6.88797	-14.7625	-17.9544	0.998382			-22.7263	18.1526	22.5683	3.84906	-6.65272	-5.25381	4.33202	0.982016	-5.83576	-14.027	5.06919	-9.03711	-20.7656
0.864	-9.44119	-17.2301	-16.0885	-8.68487	-2.3919	3.79855	1.38813	17.9344	3.54318	-6.9147	-14.7994	-17.8897	0.924112			-22.6135	18.323	22.6154	3.8907	-6.73043	-5.30156	4.33489	1.07418	-5.81959	-14.085	5.14107	-8.93519	-20.8811
0.866	-9.55626	-17.2243	-15.8581	-8.62684	-2.32533	3.79124	1.37845	18.2044	3.51151	-6.93382	-14.8627	-17.9024	0.858522			-22.5111	18.6316	22.6755	3.96752	-6.79948	-5.31628	4.33147	1.17326	-5.76089	-14.1516	5.2199	-8.81359	-20.8485
0.868	-9.58262	-17.1771	-15.6807	-8.57093	-2.27123	3.76463	1.31452	18.3869	3.47512	-6.95953	-14.9587	-17.9181	0.966798			-22.4336	18.9118	22.7302	4.04284	-6.83448	-5.29446	4.31463	1.18728	-5.67276	-14.1869	5.29663	-8.69277	-20.7691
0.87	-9.52188	-17.1244	-15.6256	-8.52715	-2.23338	3.73717	1.1914	18.4338	3.45647	-6.9538	-15.0392	-17.9528	1.05588			-22.4759	18.9997	22.7608	4.11284	-6.83266	-5.25686	4.3332	1.18271	-5.6061	-14.2236	5.26691	-8.68287	-20.5811
0.872	-9.45944	-17.1392	-15.6877	-8.47591	-2.20548	3.68511	1.08311	18.4128	3.39219	-6.94221	-15.119	-17.9497	1.14657			-22.5667	18.9628	22.7918	4.17088	-6.80513	-5.21455	4.35266	1.16991	-5.52208	-14.2187	5.20747	-8.71725	-20.3348
0.874	-9.41317	-17.1206	-15.8657	-8.41698	-2.23996	3.62627	1.00352	18.3709	3.3871	-6.95488	-15.1677	-17.9903	1.27509			-22.6977	18.9234	22.7878	4.25576	-6.80481	-5.1275	4.36871	1.11679	-5.47639	-14.2442	5.19791	-8.74034	-20.1886
0.876	-9.35817	-17.1345	-16.1256	-8.40533	-2.29698	3.58435	1.01476	18.2928	3.38825	-6.98137	-15.136	-18.0282	1.43977			-22.7834	18.8457	22.7436	4.34171	-6.75889	-5.01644	4.36251	1.06551	-5.49676	-14.2922	5.13405	-8.75827	-20.1436
0.878	-9.31683	-17.2614	-16.4262	-8.38778	-2.40902	3.56889	1.04356	18.1573	3.41303	-7.01138	-15.0055	-18.1488	1.53507			-22.8913	18.7139	22.6859	4.38326	-6.73429	-4.9695	4.36612	1.07783	-5.50047	-14.2994	5.04536	-8.74055	-20.1816
0.88	-9.25798	-17.3866	-16.7052	-8.42002	-2.46726	3.54872	1.09036	17.9344	3.52272	-7.06184	-14.7865	-18.2338	1.48429			-22.9649	18.5141	22.7222	4.40517	-6.73497	-4.97454	4.36785	1.15191	-5.59205	-14.3193	4.97606	-8.82573	-20.292
0.882	-9.19708	-17.4829	-17.0211	-8.48523	-2.44817	3.53248	1.14652	17.758	3.66388	-7.08138	-14.5823	-18.3397	1.35724			-23.0468	18.3079	22.7478	4.43079	-6.74901	-4.99292	4.36338	1.27008	-5.6785	-14.3194	4.98625	-8.95357	-20.4125
0.884	-9.14362	-17.6658	-17.2091	-8.56145	-2.39789	3.54437	1.19693	17.6604	3.78154	-7.08917	-14.4185	-18.4891	1.18784			-23.1752	18.2248	22.7426	4.50191	-6.79753	-5.04648	4.3731	1.38628	-5.77158	-14.2844	5.00371	-9.07826	-20.4582
0.886	-9.117	-18.0315	-17.3089	-8.63895	-2.33835	3.56248	1.28549	17.6474	3.8291	-7.09926	-14.2924	-18.6362	0.986958			-23.356	18.2262	22.654	4.59547	-6.83914	-5.08148	4.39132	1.38957	-5.79169	-14.2447	5.01733	-9.16822	-20.4675
0.888	-9.03594	-18.2613	-17.354	-8.70617	-2.28068	3.6252	1.37759	17.6491	3.83286	-7.09909	-14.2683	-18.7263	0.857906			-23.5412	18.2326	22.4699	4.70373	-6.89591	-5.14133	4.38406	1.40081	-5.73511	-14.2439	5.01448	-9.24525	-20.5472
0.89	-8.97138	-18.3479	-17.3721	-8.80404	-2.22956	3.70966	1.42647	17.7473	3.81347	-7.11595	-14.3278	-18.7516	0.75852			-23.7289	18.1374	22.2112	4.79685	-6.961	-5.24434	4.36803	1.40221	-5.70976	-14.26	4.98273	-9.27987	-20.6106
0.892	-8.98374	-18.3128	-17.4334	-8.90501	-2.16705	3.79702	1.43825	17.934	3.73132	-7.11001	-14.4268	-18.6862	0.783818			-23.8282	18.0407	21.9482	4.91207	-7.02874	-5.37256	4.37301	1.44535	-5.67211	-14.2972	5.00041	-9.282	-20.5396
0.894	-9.04287	-18.1787	-17.6092	-9.03367	-2.0883	3.85953	1.39453	18.1356	3.68813	-7.11469	-14.5128	-18.5809	0.824502			-23.9558	18.0931	21.7735	5.0099	-7.03448	-5.43922	4.37395	1.49957	-5.68777	-14.341	5.06713	-9.20863	-20.4119
0.896	-9.10833	-18.0827	-17.7975	-9.09889	-2.06387	3.86989	1.29753	18.3983	3.59163	-7.09932	-14.5745	-18.5975	0.90552			-24.0309	18.2046	21.6741	5.08354	-7.061	-5.44148	4.4077	1.56381	-5.67913	-14.342	5.13668	-9.14547	-20.1944
0.898	-9.17259	-17.9633	-17.8938	-9.16318	-2.08074	3.77763	1.20791	18.5869	3.51775	-7.09913	-14.6359	-18.641	0.98651			-24.1007	18.1796	21.6591	5.0707	-7.0776	-5.41561	4.45992	1.53076	-5.71213	-14.3974	5.21646	-9.00788	-20.0372
0.9	-9.2535	-17.9275	-17.8202	-9.16196	-2.0768	3.63944	1.12949	18.6577	3.45684	-7.10851	-14.6879	-18.761	1.09791			-24.1273	17.9587	21.7408	5.0056	-7.0294	-5.40848	4.46156	1.48483	-5.71077	-14.4795	5.28539	-8.88331	-19.9266
0.902	-9.27658	-17.963	-17.5977	-9.15505	-2.10626	3.52678	1.11185	18.7486	3.40812	-7.1183	-14.7434	-18.8889	1.17089			-24.1977	17.7036	21.9534	4.90914	-6.97579	-5.42969	4.44247	1.42631	-5.726	-14.5506	5.36784	-8.70213	-19.8766
0.904	-9.30922	-18.1003	-17.4303	-9.22331	-2.10686	3.45948	1.13515	18.7658	3.33109	-7.11271	-14.8302	-19.0558	1.17691			-24.2251	17.5959	22.195	4.8064	-6.94665	-5.4636	4.44578	1.36948	-5.78584	-14.6306	5.41568	-8.58242	-19.8893
0.906	-9.2237	-18.2476	-17.2441	-9.29005	-2.14974	3.46636	1.18695	18.7442	3.28523	-7.1317	-14.8587	-19.2464	1.17118			-24.098	17.6202	22.3826	4.66564	-6.88922	-5.48265	4.46838	1.37192	-5.76979	-14.6917	5.47561	-8.38956	-19.9982
0.908	-9.09104	-18.2462	-17.0873	-9.36652	-2.1404	3.51096	1.24834	18.6944	3.19539	-7.16083	-14.9101	-19.3808	1.01718			-23.948	17.7957	22.4526	4.52757	-6.85213	-5.48345	4.48379	1.43248	-5.84518	-14.8131	5.57537	-8.30021	-20.0839
0.91	-8.89063	-18.2528	-17.0363	-9.47755	-2.15468	3.57372	1.3223	18.5186	3.13205	-7.21213	-14.9858	-19.4951	0.851228			-23.9524	17.9029	22.4119	4.4325	-6.84391	-5.481	4.48785	1.47351	-5.86534	-14.9259	5.65438	-8.18695	-20.1256
0.912	-8.71133	-18.2616	-17.1895	-9.57408	-2.13606	3.652	1.40647	18.1065	3.08134	-7.2554	-14.9997	-19.6217	0.731766			-23.9963	17.9655	22.2637	4.33399	-6.8276	-5.50344	4.48437	1.66002	-5.92206	-15.0533	5.71343	-8.08563	-20.1802
0.914	-8.49188	-18.1865	-17.5318	-9.61205	-2.11751	3.71904	1.48996	17.9949	3.01801	-7.30153	-15.0325	-19.7112	0.589414			-24.1034	17.9409	22.1446	4.2736	-6.84317	-5.50502	4.49618	1.80394	-5.95224	-15.1925	5.76589	-7.98393	-20.2552
0.916	-8.37256	-18.0706	-17.9943	-9.64985	-2.0944	3.76725	1.57584	17.9945	2.96437	-7.37783	-15.0643	-19.8173	0.549038			-24.1648	18.0005	21.9938	4.26803	-6.90607	-5.52182	4.50085	1.90872	-6.00866	-15.3492	5.80919	-7.92035	-20.2748
0.918	-8.23193	-18.1712	-18.3519	-9.66972	-2.06784	3.7424	1.62315	18.051	2.87295	-7.43232	-15.1042	-19.905	0.640276			-24.1733	17.9956	21.9586	4.33609	-6.96156	-5.52037	4.49439	1.95353	-6.03064	-15.5039	5.8305	-7.84211	-20.284
0.92	-8.13396	-18.2757	-18.6748	-9.67327	-2.02796	3.65463	1.61998	18.0695	2.83093	-7.4674	-15.1047	-19.9992	0.751744			-24.194	17.9089	21.9806	4.37226	-7.05167	-5.5433	4.4731	2.02406	-6.10392	-15.6315	5.86992	-7.76576	-20.2197
0.922	-8.16446	-18.4221	-18.9663	-9.62175	-1.9738	3.53571	1.53422	17.9825	2.76108	-7.48073	-15.1454	-20.102	0.811496			-24.1401	17.7747	22.0514	4.44336	-7.10308	-5.60578	4.4833	2.09096	-6.1021	-15.7625	5.94339	-7.6932	-20.0915
0.924	-8.32632	-18.6154	-19.04	-9.62618	-1.93686	3.43822	1.45221	17.9572	2.7033	-7.45563	-15.1728	-20.2412	0.85344			-24.1645	17.626	22.1368	4.51318	-7.16731	-5.67757	4.52878	2.15761	-6.11573	-15.8728	5.98703	-7.58839	-19.9966
0.926	-8.48932	-18.7663	-18.9995	-9.58432	-1.88133	3.36224	1.36707	17.9656	2.61064	-7.44874	-15.236	-20.3505	0.873334			-24.1942	17.6458	22.0599	4.61168	-7.20997	-5.71512	4.5752	2.22711	-6.15203	-15.96	6.04258	-7.50438	-19.8961
0.928	-8.64002	-18.9916	-18.7988	-9.50834	-1.86077	3.37553	1.32572	18.0391	2.54296	-7.43123	-15.2478	-20.4626	0.899066			-24.2699	17.7913	21.8783	4.65878	-7.23149	-5.75569	4.58346	2.13219	-6.20922	-15.9354	6.06046	-7.42659	-19.823
0.93	-8.70804	-19.1163	-18.4443	-9.41244	-1.82991	3.45474	1.32989	18.1371	2.4646	-7.46256	-15.3118	-20.6	0.935872			-24.336	17.9751	21.6662	4.65597	-7.26737	-5.76643	4.57471	2.06633	-6.25447	-15.9988	6.17236	-7.38696	-19.741
0.932	-8.69305	-19.1666	-18.249	-9.3375	-1.78504	3.5538	1.37824	18.2073	2.41601	-7.51565	-15.3136	-20.7054	0.99008			-24.311	18.0573	21.4992	4.66619	-7.26562	-5.73933	4.5626	1.96272	-6.28449	-15.9947	6.24876	-7.45321	-19.7784
0.934	-8.65658	-19.2262	-18.2528	-9.34553	-1.74681	3.64437	1.41628	18.2391	2.34676	-7.56973	-15.3767	-20.7261	1.01693			-24.2084	18.0208	21.4772	4.64026	-7.23647	-5.66121	4.57178	1.85342	-6.30759	-15.9797	6.356	-7.56889	-19.9076
0.936	-8.55625	-19.2668	-18.3548	-9.36498	-1.68907	3.69876	1.46544	18.3596	2.29957	-7.65559	-15.4379	-20.674	0.977284			-24.1368	17.9546	21.5886	4.60838	-7.21435	-5.60609	4.59396	1.78871	-6.32262	-15.9196	6.48698	-7.70799	-19.999
0.938	-8.48007	-19.284	-18.4989	-9.39905	-1.69168	3.66888	1.5471	18.4355	2.20506	-7.71102	-15.4894	-20.6211	0.927486			-24.1659	17.9274	21.7193	4.54783	-7.18263	-5.61742	4.59823	1.75599	-6.38704	-15.8886	6.58043	-7.82218	-20.0365
0.94	-8.38166	-19.2318	-18.8179	-9.43018	-1.70989	3.61669	1.62756	18.3999	2.14805	-7.7714	-15.6048	-20.4913	0.883736			-24.3539	17.9562	21.7756	4.50204	-7.11582	-5.68632	4.59875	1.7264	-6.42289	-15.9633	6.61741	-7.7968	-20.0328
0.942	-8.27501	-19.077	-19.1689	-9.47989	-1.7586	3.49481	1.68746	18.3415	2.09555	-7.79339	-15.6936	-20.3412	0.894362			-24.5309	17.8987	21.8117	4.49911	-7.09612	-5.73902	4.58563	1.75664	-6.42692	-15.9585	6.52834	-7.76391	-20.0061
0.944	-8.17369	-18.9813	-19.4761	-9.52706	-1.84297	3.37177	1.73142	18.2577	2.02416	-7.79296	-15.7723	-20.2925	0.906206			-24.723	17.7209	21.8749	4.46438	-7.13986	-5.79963	4.56421	1.92345	-6.45266	-15.9683	6.44718	-7.63024	-20.0157
0.946	-7.9991	-18.9997	-19.7754	-9.58042	-1.92762	3.28587	1.74027	18.2144	1.94391	-7.78141	-15.8537	-20.3836	0.95494			-24.9786	17.5853	21.9446	4.43418	-7.17244	-5.85813	4.56554	2.08296	-6.48141	-16.0435	6.39554	-7.43088	-20.0756
0.948	-7.82068	-19.0734	-19.9412	-9.64106	-1.92891	3.23774	1.72094	18.3618	1.91663	-7.77622	-15.8771	-20.4841	0.987896			-25.2659	17.5545	21.974	4.42653	-7.18742	-5.88816	4.56095	2.21175	-6.55759	-16.1514	6.35764	-7.27212	-20.1583
0.95	-7.63736	-19.0282	-20.0278	-9.72881	-1.89423	3.28812	1.63321	18.5499	1.89507	-7.79701	-15.7472	-20.582	1.02539			-25.5276	17.6084	21.9044	4.40619	-7.16254	-5.92973	4.58993	2.25931	-6.5945	-16.2788	6.29202	-7.12866	-20.2809
0.952	-7.46462	-18.9389	-19.9726	-9.81222	-1.85776	3.38778	1.52736	18.7642	1.88951	-7.81116	-15.5707	-20.6503	1.07038			-25.7465	17.7482	21.6896	4.37171	-7.18424	-5.93292	4.64671	2.31969	-6.66029	-16.3815	6.32247	-7.00281	-20.3666
0.954	-7.3486	-18.9165	-19.8909	-9.89239	-1.79747	3.4813	1.46051	19.057	1.98156	-7.82403	-15.3864	-20.7332	1.06228			-25.8467	17.7665	21.3551	4.33896	-7.16292	-5.87255	4.68525	2.40366	-6.668	-16.4737	6.34234	-6.88211	-20.4094
0.956	-7.29348	-18.7398	-19.9498	-9.97854	-1.74201	3.56517	1.41869	19.2396	2.06107	-7.85817	-15.236	-20.8031	1.0527			-25.8787	17.8834	21.1633	4.29895	-7.18628	-5.79648	4.68811	2.48584	-6.70793	-16.5903	6.38952	-6.75298	-20.3899
0.958	-7.24794	-18.5578	-20.1036	-10.089	-1.66803	3.54525	1.43592	19.4122	2.12982	-7.8855	-15.1181	-20.9064	1.01577			-25.7923	18.0643	21.2005	4.33385	-7.23052	-5.79124	4.68223	2.58467	-6.74815	-16.7134	6.42405	-6.62211	-20.4064
0.96	-7.32094	-18.4415	-20.1842	-10.2771	-1.60677	3.49264	1.45872	19.6059	2.18821	-7.93362	-15.0229	-20.9998	0.949088			-25.6913	18.1953	21.4849	4.3317	-7.25112	-5.80971	4.66752	2.63351	-6.73133	-16.8434	6.43009	-6.46484	-20.3833
0.962	-7.38588	-18.3924	-20.2277	-10.4806	-1.52389	3.38558	1.49579	19.7928	2.18246	-7.97983	-14.9941	-21.1346	0.966882			-25.6122	18.1542	21.8161	4.38217	-7.27654	-5.88396	4.66024	2.64258	-6.68287	-16.9861	6.41939	-6.36397	-20.4725
0.964	-7.51779	-18.3541	-20.2196	-10.7359	-1.47868	3.26374	1.54445	19.8328	2.15445	-8.01744	-15.0237	-21.2769	1.08111			-25.5021	18.0412	22.0964	4.38245	-7.26121	-5.94177	4.66022	2.63928	-6.61462	-17.114	6.4737	-6.37998	-20.5963
0.966	-7.68267	-18.3517	-20.3144	-11.0126	-1.44232	3.16984	1.60395	19.8727	2.04709	-8.05332	-15.0916	-21.3486	1.20938			-25.4029	18.0117	22.2073	4.35929	-7.25845	-5.98951	4.65553	2.59244	-6.50817	-17.2613	6.53624	-6.44886	-20.7612
0.968	-7.78007	-18.428	-20.4781	-11.2822	-1.46364	3.12052	1.70288	19.8558	1.92658	-8.10323	-15.1857	-21.3887	1.36664			-25.3557	18.1357	22.1028	4.34273	-7.24809	-6.03463	4.66143	2.53175	-6.4016	-17.4206	6.69171	-6.54426	-21.0307
0.97	-7.81666	-18.5495	-20.6419	-11.4659	-1.48569	3.12722	1.75323	19.8215	1.88103	-8.12211	-15.3115	-21.4128	1.50524			-25.3002	18.4488	21.895	4.34335	-7.2371	-6.07295	4.63798	2.5655	-6.30217	-17.5603	6.78506	-6.59001	-21.233
0.972	-7.8084	-18.6343	-20.7316	-11.6198	-1.54139	3.1984	1.80005	19.7222	1.86067	-8.12007	-15.506	-21.3576	1.47433			-25.2307	18.5577	21.6028	4.34067	-7.21433	-6.09262	4.61223	2.62272	-6.22497	-17.6656	6.8525	-6.62507	-21.2022
0.974	-7.73947	-18.6944	-20.8797	-11.6393	-1.60159	3.29724	1.83322	19.6121	1.80201	-8.07663	-15.6864	-21.2388	1.35278			-25.2826	18.5776	21.3559	4.35459	-7.2172	-6.06204	4.60187	2.7287	-6.11919	-17.7255	6.82184	-6.60978	-21.1555
0.976	-7.64905	-18.6796	-20.9935	-11.5941	-1.59221	3.38534	1.74822	19.401	1.80688	-8.03328	-15.8095	-21.1263	1.25756			-25.3847	18.5656	21.2299	4.33331	-7.17779	-5.99733	4.63394	2.85179	-6.02106	-17.7209	6.78989	-6.50411	-21.1841
0.978	-7.56888	-18.655	-21.0342	-11.4878	-1.60937	3.3927	1.65512	19.126	1.80627	-8.00848	-15.8887	-20.9707	1.16236			-25.5111	18.5667	21.2911	4.24648	-7.13712	-5.95715	4.6866	2.98264	-5.97555	-17.7002	6.81212	-6.32499	-21.2854
0.98	-7.42004	-18.6235	-20.9467	-11.3637	-1.60202	3.35654	1.57114	18.9946	1.78924	-7.98703	-15.8402	-20.9176	1.02389			-25.7105	18.5592	21.4976	4.21651	-7.11439	-5.93711	4.76014	3.06855	-5.96292	-17.5342	6.75255	-6.1091	-21.4217
0.982	-7.30957	-18.5843	-20.8119	-11.283	-1.58362	3.29378	1.54687	18.9549	1.76599	-8.02039	-15.7482	-20.8614	0.932862			-25.8602	18.4916	21.8431	4.13609	-7.09772	-5.97163	4.78218	3.05557	-6.0243	-17.4459	6.72272	-5.93932	-21.5776
0.984	-7.20146	-18.5078	-20.7616	-11.2682	-1.54864	3.22869	1.5458	18.9895	1.82967	-8.1615	-15.6821	-20.8608	0.87724			-26.0372	18.367	22.0176	4.07319	-7.10053	-6.03385	4.76771	3.08455	-6.1586	-17.3949	6.80875	-5.76306	-21.712
0.986	-7.01044	-18.5039	-20.9199	-11.2627	-1.4616	3.1164	1.56827	19.1392	1.89836	-8.20018	-15.6625	-20.8898	0.951006			-26.224	18.1926	22.0139	4.03206	-7.10552	-6.08675	4.75976	3.10324	-6.29997	-17.4238	6.93455	-5.70584	-21.873
0.988	-6.86934	-18.5824	-21.18	-11.2467	-1.39364	3.02982	1.61168	19.308	1.93663	-8.27621	-15.6627	-20.927	1.02694			-26.4367	17.9884	21.8165	3.96801	-7.1387	-6.15229	4.75902	3.07735	-6.4108	-17.3815	6.99371	-5.67062	-21.9666
0.99	-6.68655	-18.7142	-21.5302	-11.2109	-1.344	2.96047	1.66167	19.3959	1.99366	-8.31117	-15.6492	-20.9787	1.19475			-26.4927	17.7971	21.6721	3.96354	-7.15226	-6.19559	4.75125	3.01034	-6.50289	-17.3667	7.09664	-5.82352	-22.0386
0.992	-6.55666	-18.8851	-21.8996	-11.1897	-1.28282	2.91224	1.74924	19.4571	2.0209	-8.30787	-15.6671	-20.9612	1.40631			-26.4765	17.651	21.5593	3.9594	-7.16765	-6.2267	4.75383	2.8826	-6.51727	-17.4247	7.23674	-5.96578	-21.968
0.994	-6.55518	-19.0809	-22.2533	-11.1729	-1.22151	2.91217	1.81745	19.5268	2.06836	-8.31235	-15.676	-20.9551	1.59482			-26.4214	17.5878	21.5106	3.98632	-7.15221	-6.26202	4.7313	2.791	-6.45863	-17.5326	7.32816	-6.18681	-21.9028
0.996	-6.59543	-19.1788	-22.4373	-11.1605	-1.1852	2.99044	1.86745	19.596	2.03808	-8.33594	-15.6854	-21.0484	1.66316			-26.3547	17.5642	21.457	4.03134	-7.12071	-6.24455	4.71579	2.70507	-6.39353	-17.643	7.47642	-6.40881	-21.8006
0.998	-6.68359	-19.2331	-22.4814	-11.1367	-1.17489	3.09348	1.91204	19.5615	1.97343	-8.36308	-15.6936	-21.0218	1.71529			-26.2828	17.8377	21.498	4.07487	-7.11239	-6.21261	4.69571	2.80449	-6.35104	-17.7713	7.56106	-6.66603	-21.7449
1	-6.73961	-19.1554	-22.3436	-11.1456	-1.17183	3.14749	1.9305	19.4008	1.86115	-8.3704	-15.6889	-20.9138	1.66058			-26.273	18.1303	21.5607	4.126	-7.15005	-6.18887	4.70124	2.84857	-6.33287	-17.9297	7.68069	-6.96987	-21.7662
1.002	-6.85038	-19.0373	-22.0691	-11.1388	-1.24047	3.13988	1.84778	19.2391	1.78161	-8.41739	-15.706	-20.8188	1.62099			-26.2356	18.3236	21.6938	4.14807	-7.16062	-6.15927	4.72693	2.93997	-6.30945	-18.0786	7.80129	-7.10207	-21.8686
1.004	-6.98965	-18.8444	-21.7247	-11.1111	-1.32273	3.09417	1.75339	19.0089	1.64745	-8.46768	-15.7251	-20.7291	1.69327			-26.1871	18.3149	21.9527	4.18393	-7.14258	-6.1466	4.77894	3.04287	-6.26494	-18.2185	7.90251	-7.01414	-22.0756
1.006	-7.0776	-18.6956	-21.4798	-11.1289	-1.37991	3.02764	1.66926	19.054	1.56024	-8.51182	-15.7432	-20.7152	1.811			-26.1118	18.1627	22.0991	4.20385	-7.12781	-6.1753	4.83175	3.2122	-6.29159	-18.3612	7.98669	-6.98832	-22.3415
1.008	-7.06104	-18.5678	-21.3679	-11.1641	-1.46118	2.96261	1.63015	19.1838	1.47382	-8.52026	-15.7684	-20.7658	1.91502			-26.1225	17.8974	22.1411	4.22094	-7.12067	-6.24217	4.89192	3.33403	-6.27722	-18.4873	8.11182	-6.92615	-22.5957
1.01	-7.01287	-18.4273	-21.4224	-11.1619	-1.5259	2.86894	1.59674	19.2719	1.41056	-8.50569	-15.7517	-20.7874	2.03267			-26.1543	17.7822	22.1353	4.23465	-7.06154	-6.29507	4.89936	3.38097	-6.27693	-18.5769	8.19489	-6.89634	-22.8425
1.012	-6.95199	-18.3584	-21.6825	-11.2082	-1.52831	2.75513	1.6057	19.423	1.33287	-8.46035	-15.7543	-20.8041	2.16952			-26.227	17.6011	22.1219	4.19608	-7.04292	-6.35037	4.89751	3.46296	-6.30028	-18.6276	8.30221	-6.81654	-23.084
1.014	-6.84998	-18.4138	-21.9902	-11.2679	-1.51465	2.6535	1.64174	19.6119	1.22744	-8.42274	-15.7809	-20.8183	2.28921			-26.26	17.3921	22.1005	4.12453	-7.03802	-6.41337	4.86105	3.53004	-6.30801	-18.6256	8.3904	-6.68571	-23.3487
1.016	-6.75668	-18.4684	-22.291	-11.3744	-1.51462	2.59798	1.70464	19.7756	1.1229	-8.41232	-15.8049	-20.8528	2.4319			-26.3019	17.3089	22.0544	4.0677	-7.03784	-6.46192	4.83581	3.61949	-6.35422	-18.5786	8.4611	-6.52247	-23.6742
1.018	-6.72942	-18.5275	-22.566	-11.4727	-1.44848	2.58488	1.77988	20.0119	1.03821	-8.40458	-15.8455	-20.9207	2.47227			-26.3205	17.315	21.9222	3.98658	-7.03933	-6.4878	4.82789	3.70499	-6.32419	-18.5069	8.45802	-6.41616	-23.935
1.02	-6.76434	-18.5902	-22.7531	-11.5621	-1.3887	2.60597	1.85238	20.1933	0.933744	-8.53395	-15.9031	-20.9106	2.45342			-26.3357	17.3852	21.7972	3.91406	-7.04241	-6.48409	4.81333	3.77168	-6.35607	-18.222	8.45058	-6.28291	-23.9863
1.022	-6.81817	-18.6699	-22.8016	-11.624	-1.34544	2.70243	1.90875	20.3197	0.850276	-8.5794	-15.9456	-21.003	2.4382			-26.3458	17.463	21.7556	3.87257	-7.05281	-6.46423	4.78939	3.78262	-6.38056	-18.3207	8.39748	-6.0641	-23.8255
1.024	-6.79619	-18.6295	-22.6869	-11.6932	-1.30211	2.78438	1.95181	20.3963	0.74522	-8.66652	-16.0002	-21.0685	2.4061			-26.4017	17.5208	21.8026	3.80983	-7.04053	-6.43157	4.77992	3.81154	-6.3712	-18.3192	8.3617	-5.84304	-23.6011
1.026	-6.76417	-18.5987	-22.5316	-11.765	-1.26678	2.80466	1.94758	20.4675	0.6608	-8.64898	-16.0427	-21.0939	2.41265			-26.5282	17.506	21.936	3.76139	-7.04647	-6.38606	4.76346	3.8093	-6.36971	-18.328	8.30229	-5.67686	-23.4009
1.028	-6.6641	-18.5388	-22.338	-11.8033	-1.22067	2.79212	1.878	20.4794	0.615552	-8.64098	-16.0081	-21.1825	2.33654			-26.6458	17.5335	22.024	3.7312	-7.02106	-6.31593	4.78447	3.74245	-6.43415	-18.4417	8.24604	-5.47338	-23.2075
1.03	-6.54398	-18.4982	-22.104	-11.8631	-1.17184	2.76655	1.78913	20.4401	0.59381	-8.63961	-15.906	-21.234	2.18061			-26.7761	17.5222	22.0685	3.74209	-7.05004	-6.28622	4.82999	3.70434	-6.51715	-18.5499	8.23624	-5.35504	-23.0986
1.032	-6.38001	-18.4457	-21.9858	-11.9128	-1.16983	2.72758	1.70089	20.3977	0.662298	-8.64492	-15.8087	-21.2635	2.14008			-26.9081	17.4727	22.0771	3.77159	-7.05866	-6.27327	4.89688	3.70145	-6.57639	-18.6738	8.31313	-5.19877	-23.0772
1.034	-6.24882	-18.3756	-22.049	-11.9523	-1.18668	2.65635	1.65535	20.2032	0.718494	-8.65787	-15.7637	-21.3066	2.15289			-27.0792	17.2947	22.0237	3.87506	-7.08887	-6.33006	4.93286	3.77126	-6.64119	-18.8303	8.42303	-5.09477	-23.0598
1.036	-6.10352	-18.3404	-22.1925	-12.0573	-1.20737	2.56722	1.63701	19.9015	0.748762	-8.67086	-15.6737	-21.366	2.22905			-27.2048	17.0912	21.933	3.95486	-7.06917	-6.38695	4.93608	3.89043	-6.66317	-18.9695	8.55064	-4.91851	-23.1443
1.038	-5.97493	-18.4231	-22.3781	-12.1572	-1.22401	2.48262	1.64592	19.7187	0.795102	-8.69133	-15.6191	-21.4458	2.29274			-27.3168	16.9393	21.8707	4.06722	-7.00091	-6.4757	4.92817	4.00215	-6.63176	-19.0888	8.60516	-4.82964	-23.3168
1.04	-5.82375	-18.5335	-22.5454	-12.3636	-1.22564	2.41212	1.67468	19.7071	0.775712	-8.7124	-15.5307	-21.4787	2.39438			-27.4155	16.9558	21.7937	4.1272	-6.92959	-6.55136	4.92415	4.1005	-6.56309	-19.2304	8.68183	-4.64202	-23.569
1.042	-5.67654	-18.6442	-22.7238	-12.5448	-1.16556	2.36141	1.69442	19.7549	0.730702	-8.69022	-15.4807	-21.5454	2.52535			-27.459	17.0368	21.8538	4.1526	-6.85021	-6.64913	4.89966	4.13809	-6.42771	-19.2205	8.73884	-4.4983	-23.8535
1.044	-5.53638	-18.7147	-22.893	-12.7543	-1.14754	2.36291	1.75742	19.8413	0.607754	-8.71123	-15.4108	-21.5788	2.71541			-27.4729	17.0486	21.904	4.16935	-6.79133	-6.73149	4.89668	4.15668	-6.37678	-19.5012	8.81114	-4.36233	-24.0966
1.046	-5.50246	-18.7398	-23.0021	-12.9376	-1.12451	2.3731	1.82612	20.0515	0.480732	-8.65971	-15.3362	-21.6587	2.97653			-27.453	17.0817	22.0033	4.15677	-6.79805	-6.84088	4.89076	4.20395	-6.28505	-19.5187	8.88847	-4.22148	-24.2535
1.048	-5.48373	-18.7331	-23.1132	-13.0798	-1.0955	2.3718	1.92328	20.2486	0.348908	-8.63057	-15.2974	-21.7495	3.19565			-27.3879	17.0679	22.0251	4.14847	-6.77858	-6.90108	4.87668	4.25179	-6.24705	-19.2799	8.87708	-4.1271	-24.3198
1.05	-5.56084	-18.7539	-23.1043	-13.1888	-1.10669	2.3599	1.96573	20.4401	0.208978	-8.6157	-15.2486	-21.9189	3.35124			-27.3354	17.0748	21.916	4.05691	-6.84337	-6.89175	4.86188	4.28953	-6.19991	-19.3946	8.79838	-4.0392	-24.2981
1.052	-5.70311	-18.8195	-23.0218	-13.2303	-1.09073	2.33171	2.01303	20.5742	0.094024	-8.63229	-15.2359	-22.0239	3.39508			-27.3033	17.0634	21.8015	3.9531	-6.94233	-6.7858	4.83931	4.27213	-6.17068	-19.2804	8.67775	-4.01121	-24.267
1.054	-5.83237	-18.856	-22.9745	-13.2745	-1.09585	2.27802	2.01984	20.7131	-0.008484	-8.7114	-15.3246	-22.11	3.37358			-27.306	17.1019	21.6116	3.87401	-7.04208	-6.65829	4.83378	4.16738	-6.1333	-19.1752	8.59758	-4.09906	-24.3559
1.056	-5.94471	-18.9508	-23.0342	-13.2853	-1.10197	2.19086	1.95595	20.7148	-0.147126	-8.79229	-15.3977	-22.1149	3.28769			-27.3573	17.0659	21.4476	3.75934	-7.13142	-6.58596	4.85986	4.05857	-6.1263	-19.1138	8.50678	-4.16234	-24.5302
1.058	-6.03375	-19.0714	-23.1428	-13.3183	-1.0731	2.11154	1.8524	20.7092	-0.25431	-8.80018	-15.4644	-22.1052	3.11738			-27.3521	16.9304	21.2853	3.65415	-7.16668	-6.55371	4.91933	4.0489	-6.08026	-19.1334	8.48133	-4.2419	-24.7503
1.06	-6.08524	-19.1907	-23.322	-13.3508	-1.04649	2.09654	1.78727	20.5921	-0.346458	-8.78688	-15.5234	-22.014	3.00202			-27.2923	16.8062	21.0844	3.58824	-7.15897	-6.5596	4.99666	4.07765	-6.00492	-19.2401	8.38569	-4.28897	-24.887
1.062	-6.08234	-19.2327	-23.5646	-13.3662	-1.02812	2.11109	1.73554	20.4837	-0.419146	-8.79896	-15.5084	-21.856	2.8723			-27.2872	16.7462	20.8528	3.5135	-7.14623	-6.59222	5.04636	4.14905	-5.98616	-19.3802	8.31561	-4.23055	-24.9319
1.064	-6.05371	-19.1867	-23.6972	-13.3905	-0.961954	2.14701	1.70666	20.4401	-0.416696	-8.81612	-15.4306	-21.6262	2.76825			-27.2829	16.6162	20.756	3.5126	-7.08124	-6.65874	5.03408	4.27921	-5.91657	-19.5279	8.29923	-4.08297	-25.0057
1.066	-5.99294	-19.0447	-23.8048	-13.3984	-0.890008	2.18576	1.70544	20.5624	-0.377594	-8.81133	-15.3891	-21.4682	2.70908			-27.3256	16.4416	20.8437	3.54361	-6.99352	-6.73037	5.02144	4.43906	-5.96186	-19.6338	8.3391	-3.9628	-25.1
1.068	-5.84552	-18.8735	-23.8115	-13.4488	-0.877744	2.23728	1.74429	20.7652	-0.271264	-8.79883	-15.3762	-21.4563	2.86852			-27.3859	16.3302	21.0862	3.59912	-6.93584	-6.80182	5.00205	4.58811	-5.99578	-19.7522	8.37161	-3.80579	-25.1642
1.07	-5.73611	-18.714	-23.7014	-13.4999	-0.846118	2.28102	1.79939	20.927	-0.165704	-8.80092	-15.3694	-21.4763	3.13669			-27.391	16.315	21.3562	3.6602	-6.9287	-6.86655	4.97967	4.70683	-6.04755	-19.8841	8.43798	-3.64533	-25.049
1.072	-5.58265	-18.4772	-23.6205	-13.5906	-0.829024	2.27301	1.86773	21.0921	-0.052584	-8.81299	-15.3314	-21.4856	3.34908			-27.4697	16.476	21.5755	3.76282	-6.93078	-6.87008	4.95855	4.80469	-6.04345	-20.0003	8.53656	-3.55457	-24.869
1.074	-5.39924	-18.2418	-23.6488	-13.6846	-0.854182	2.21187	1.94239	21.2313	-0.023954	-8.83092	-15.2649	-21.4685	3.53109			-27.555	16.616	21.6218	3.89934	-6.98306	-6.8061	4.93924	4.92762	-6.04428	-20.1283	8.62203	-3.56276	-24.8932
1.076	-5.2795	-18.0579	-23.6677	-13.8338	-0.946946	2.11067	2.01974	21.3839	0.058058	-8.83225	-15.2326	-21.5489	3.64539			-27.633	16.6735	21.5194	4.01934	-7.08413	-6.75123	4.91151	5.06274	-6.04495	-20.2567	8.72584	-3.63761	-24.9231
1.078	-5.17278	-17.9412	-23.6822	-13.9386	-1.0052	1.99458	2.07843	21.6208	0.087248	-8.81579	-15.207	-21.5675	3.58756			-27.756	16.6837	21.3188	4.06116	-7.13077	-6.73316	4.8855	5.25552	-5.99249	-20.2995	8.80652	-3.79392	-24.9575
1.08	-5.16848	-17.9502	-23.6418	-14.0253	-1.00094	1.89468	2.10797	21.8913	0.120344	-8.79683	-15.1704	-21.5826	3.52995			-27.9444	16.7135	21.0662	4.07408	-7.16167	-6.72218	4.87595	5.45553	-5.93734	-20.166	8.9166	-3.89448	-25.0882
1.082	-5.21671	-17.9815	-23.8119	-14.0949	-0.98315	1.81069	2.06346	22.119	0.1267	-8.75916	-15.1128	-21.5897	3.48762			-28.1147	16.8363	20.8452	4.08475	-7.11229	-6.74519	4.88307	5.58275	-5.86036	-20.1892	9.00234	-4.07665	-25.3198
1.084	-5.29365	-18.0415	-23.8701	-14.1664	-0.975856	1.78611	1.9837	22.1028	0.121408	-8.7443	-15.0585	-21.5669	3.51214			-28.3293	16.9866	20.7657	4.10976	-7.06705	-6.77676	4.93062	5.56374	-5.80159	-20.1286	9.09664	-4.21403	-25.6212
1.086	-5.41505	-18.0666	-23.8992	-14.1886	-0.95074	1.83721	1.90502	22.0219	0.07791	-8.73925	-14.9951	-21.5002	3.54236			-28.4746	17.062	20.7926	4.05478	-7.03563	-6.83137	5.00814	5.48208	-5.77249	-20.0336	9.21911	-4.35347	-25.9408
1.088	-5.41695	-18.0464	-23.8499	-14.2199	-0.916034	1.93402	1.84114	21.9401	0.060844	-8.82759	-14.9515	-21.3875	3.59141			-28.6359	17.1262	20.9205	3.98611	-6.99832	-6.87403	5.0702	5.38314	-5.72691	-19.9083	9.36527	-4.34962	-26.2551
1.09	-5.39532	-17.9718	-23.6666	-14.2241	-0.844368	2.03542	1.82228	21.8519	0.066906	-8.92875	-14.9794	-21.3078	3.65925			-28.7797	17.2198	21.1239	3.85711	-6.96458	-6.88682	5.08152	5.29564	-5.72081	-19.8733	9.45029	-4.37265	-26.6073
1.092	-5.34621	-17.8864	-23.4909	-14.2352	-0.781424	2.07742	1.84145	21.6291	0.048286	-8.9546	-15.0778	-21.2667	3.70425			-28.8572	17.3456	21.402	3.73793	-6.89839	-6.89882	5.06619	5.29789	-5.71109	-20.0378	9.50954	-4.38206	-26.9714
1.094	-5.27472	-17.7719	-23.2309	-14.2283	-0.715316	2.06632	1.8844	21.4096	0.035868	-8.93382	-15.1221	-21.2468	3.72796			-28.7795	17.4266	21.5357	3.62481	-6.84523	-6.87758	5.05338	5.31206	-5.74035	-20.1106	9.50758	-4.30035	-27.2763
1.096	-5.22126	-17.7608	-23.0537	-14.2093	-0.703808	2.01785	1.9339	21.2775	0.00546	-8.91799	-15.245	-21.2362	3.73902			-28.592	17.3315	21.6726	3.55587	-6.79854	-6.84825	5.05372	5.33973	-5.71232	-20.2338	9.52648	-4.27843	-27.3326
1.098	-5.11843	-17.7739	-22.9423	-14.1976	-0.683046	1.91278	1.98713	21.3149	-0.007882	-8.90208	-15.2939	-21.2257	3.72124			-28.437	17.161	21.7366	3.4826	-6.72276	-6.81874	5.03189	5.35067	-5.69919	-20.3808	9.47474	-4.2307	-27.1385
1.1	-5.00151	-17.8989	-22.9626	-14.2153	-0.688968	1.78797	2.05981	21.4455	-0.0518	-8.86645	-15.2981	-21.2689	3.71265			-28.3466	17.0194	21.7877	3.44891	-6.7004	-6.84015	5.01334	5.3643	-5.72459	-20.3622	9.35771	-4.18998	-26.8611
1.102	-4.90347	-18.0198	-23.0878	-14.2057	-0.723324	1.66053	2.11301	21.6364	-0.060914	-8.91002	-15.2564	-21.3522	3.69982			-28.1948	16.9619	21.7618	3.46427	-6.71159	-6.84849	4.98343	5.44118	-5.70849	-20.5488	9.30335	-4.14823	-26.6917
1.104	-4.7921	-18.1816	-23.2205	-14.2256	-0.758226	1.58211	2.18875	21.7974	-0.09051	-8.89221	-15.1742	-21.4613	3.61003			-28.1507	16.8809	21.7027	3.48436	-6.71926	-6.84491	4.96989	5.59374	-5.71827	-20.6752	9.3591	-4.11288	-26.4923
1.106	-4.70057	-18.2613	-23.4036	-14.2165	-0.814646	1.55074	2.24202	22.0199	-0.145698	-8.90306	-15.0911	-21.5834	3.5735			-28.1434	16.7783	21.6381	3.57535	-6.77996	-6.87561	4.93255	5.72426	-5.71913	-20.802	9.40078	-4.11918	-26.334
1.108	-4.6895	-18.2762	-23.6614	-14.1876	-0.808192	1.61696	2.23476	22.3011	-0.222152	-8.93871	-14.9924	-21.6809	3.58474			-28.2277	16.7454	21.5985	3.67949	-6.83409	-6.94032	4.94557	5.84399	-5.76904	-20.9661	9.45189	-4.3259	-26.2697
1.11	-4.69659	-18.2562	-23.8588	-14.188	-0.790636	1.72369	2.19533	22.5149	-0.236712	-8.9601	-14.8631	-21.6899	3.6552			-28.3244	16.781	21.648	3.81375	-6.81997	-6.96906	4.96896	5.9799	-5.84098	-21.0992	9.52812	-4.47681	-26.2924
1.112	-4.70001	-18.2044	-24.0311	-14.1803	-0.806442	1.80579	2.10729	22.6523	-0.248346	-8.93945	-14.8284	-21.6699	3.74401			-28.5281	16.9336	21.6639	3.94999	-6.8146	-7.01683	5.02127	6.04722	-5.95584	-21.228	9.59518	-4.59378	-26.4257
1.114	-4.7277	-18.1277	-24.1111	-14.0816	-0.77987	1.86285	2.03582	22.7258	-0.28371	-8.90683	-14.7528	-21.6226	3.84005			-28.7059	17.1483	21.5841	4.08122	-6.80124	-7.02752	5.10068	6.02154	-6.07453	-21.2322	9.68344	-4.56519	-26.6621
1.116	-4.72994	-18.022	-24.0885	-13.95	-0.778904	1.85214	1.99151	22.7173	-0.276108	-8.89469	-14.6876	-21.6032	3.93964			-28.8659	17.3278	21.44	4.16905	-6.75716	-6.99672	5.15217	5.92725	-6.11268	-21.1463	9.75274	-4.46064	-27.0085
1.118	-4.75433	-17.8667	-23.9176	-13.89	-0.737926	1.77465	1.96203	22.7515	-0.235018	-8.86805	-14.6612	-21.5846	4.04331			-28.9503	17.3536	21.254	4.26135	-6.72482	-6.99955	5.16198	5.86068	-6.13316	-20.9476	9.78641	-4.32547	-27.3704
1.12	-4.71093	-17.7047	-23.8248	-13.9383	-0.644588	1.69793	1.97777	22.7521	-0.20069	-8.93682	-14.6069	-21.5507	4.23714			-29.0258	17.2906	21.0317	4.22037	-6.7016	-7.04696	5.14979	5.86463	-6.09325	-20.9231	9.86671	-4.17445	-27.7848
1.122	-4.71327	-17.5618	-23.7753	-14.0678	-0.56812	1.59856	1.99618	22.6716	-0.171122	-9.02289	-14.5509	-21.6231	4.44885			-29.0573	17.2359	20.6922	4.16136	-6.64621	-7.06507	5.14254	5.86436	-6.08188	-20.8177	9.92361	-4.18601	-28.0088
1.124	-4.78817	-17.5043	-23.8558	-14.1275	-0.52549	1.4825	2.02607	22.4918	-0.2072	-9.0851	-14.5062	-21.5723	4.59291			-28.8359	17.2191	20.4762	4.0852	-6.58647	-7.06173	5.14156	5.95696	-6.00587	-21.0167	10.0022	-4.10745	-28.0932
1.126	-4.77763	-17.5512	-23.963	-14.1789	-0.506464	1.38393	2.05153	22.3279	-0.253344	-9.06258	-14.4436	-21.5613	4.70774			-28.4925	17.1267	20.4524	4.01113	-6.53838	-7.03996	5.12254	6.12604	-5.92766	-21.1418	10.0692	-3.94887	-28.0841
1.128	-4.69683	-17.5909	-24.041	-14.242	-0.48062	1.30676	2.12229	22.3072	-0.314636	-9.05211	-14.4176	-21.5777	4.7388			-28.1463	17.0136	20.6073	3.91104	-6.4958	-7.02269	5.09589	6.2951	-5.88293	-21.2944	10.1333	-3.91427	-28.0694
1.13	-4.56051	-17.6524	-23.9671	-14.2732	-0.491582	1.29587	2.21322	22.302	-0.37709	-9.05668	-14.3591	-21.5877	4.57979			-27.9626	16.9844	20.9545	3.83832	-6.47511	-7.03878	5.08257	6.43066	-5.807	-21.4463	10.2157	-3.86448	-28.0819
1.132	-4.35107	-17.6684	-23.8584	-14.3492	-0.518364	1.39215	2.27632	22.3556	-0.461748	-9.04106	-14.296	-21.6192	4.33119			-27.9295	17.004	21.3454	3.81534	-6.43139	-7.05803	5.06269	6.56344	-5.801	-21.443	10.3102	-3.78199	-28.1004
1.134	-4.24147	-17.6762	-23.7842	-14.4202	-0.546798	1.48525	2.30138	22.385	-0.544992	-9.04775	-14.2249	-21.6166	4.14084			-27.9049	17.1348	21.5872	3.83736	-6.38049	-7.07078	5.03073	6.64303	-5.73271	-21.6093	10.3794	-3.69048	-28.1488
1.136	-4.20295	-17.676	-23.763	-14.5407	-0.554526	1.56121	2.32046	22.4496	-0.610344	-9.03997	-14.2104	-21.6538	4.05125			-27.9661	17.1811	21.6632	3.87302	-6.31581	-7.0875	5.01687	6.65083	-5.68715	-21.6661	10.4602	-3.60829	-28.2447
1.138	-4.26478	-17.6648	-23.6958	-14.6619	-0.532224	1.57469	2.27382	22.5243	-0.693504	-9.13423	-14.1974	-21.6462	4.07786			-28.1305	17.1876	21.6543	3.90989	-6.31372	-7.08616	5.04175	6.51542	-5.66237	-22.0613	10.5282	-3.56286	-28.2587
1.14	-4.33695	-17.6279	-23.6677	-14.7085	-0.54019	1.53933	2.1859	22.5809	-0.801136	-9.11802	-14.2514	-21.6453	4.14529			-28.2728	17.1553	21.5302	3.95972	-6.3412	-7.0453	5.11837	6.4259	-5.6211	-22.0597	10.5005	-3.48183	-28.1834
1.142	-4.42473	-17.6544	-23.7211	-14.8078	-0.560294	1.4525	2.09919	22.6827	-0.8589	-9.12836	-14.3229	-21.6554	4.29633			-28.4819	17.1005	21.358	3.98798	-6.40118	-7.03721	5.19523	6.35026	-5.55353	-22.1822	10.5243	-3.4712	-28.1643
1.144	-4.46468	-17.6287	-23.7794	-14.8457	-0.518056	1.37809	2.02609	22.7533	-0.95347	-9.12562	-14.3929	-21.6638	4.46015			-28.6367	17.0888	21.153	4.01381	-6.51081	-7.06692	5.23344	6.26933	-5.53671	-22.2856	10.5218	-3.33344	-28.207
1.146	-4.44067	-17.6289	-23.8703	-14.8102	-0.487312	1.25353	1.99476	22.7765	-0.995106	-9.13907	-14.4272	-21.6831	4.65969			-28.7025	17.0894	20.8886	3.98048	-6.61038	-7.08964	5.22969	6.23175	-5.45307	-22.3699	10.4814	-3.29126	-28.3331
1.148	-4.43838	-17.62	-23.9796	-14.6899	-0.478338	1.13352	2.00861	22.7172	-1.10676	-9.09951	-14.4358	-21.6758	4.88258			-28.5993	17.0171	20.6777	3.90282	-6.6768	-7.12554	5.21184	6.25856	-5.40655	-22.0819	10.3575	-3.1571	-28.5166
1.15	-4.39415	-17.5769	-24.084	-14.6381	-0.496482	1.01312	2.04077	22.6026	-1.19967	-9.06563	-14.3999	-21.6966	5.11546			-28.3875	16.9286	20.4855	3.81835	-6.67055	-7.17203	5.18248	6.28359	-5.34716	-21.9407	10.2553	-3.14992	-28.6899
1.152	-4.29926	-17.5094	-24.1071	-14.6703	-0.479164	0.95277	2.09094	22.4957	-1.27287	-9.12204	-14.3224	-21.7001	5.27975			-28.1483	16.8522	20.4324	3.69551	-6.61794	-7.18796	5.16594	6.41616	-5.31269	-21.8391	10.2365	-3.03038	-28.7451
1.154	-4.18219	-17.4495	-24.0924	-14.7052	-0.468972	0.948514	2.13088	22.5347	-1.35163	-9.23751	-14.21	-21.7219	5.38854			-27.9077	16.804	20.5175	3.56454	-6.56174	-7.20625	5.18302	6.5654	-5.26604	-21.8687	10.2714	-2.93674	-28.7214
1.156	-4.04516	-17.4187	-23.9983	-14.7168	-0.485982	0.975744	2.18172	22.6748	-1.44857	-9.1856	-14.0988	-21.7016	5.44162			-27.8049	16.7589	20.8065	3.42943	-6.52142	-7.21125	5.20234	6.73732	-5.23055	-21.6583	10.3309	-2.83895	-28.7021
1.158	-3.94212	-17.4045	-23.84	-14.7117	-0.45374	1.08088	2.23948	22.8977	-1.57594	-9.19943	-14.0348	-21.6969	5.30547			-27.8104	16.5993	21.1904	3.27916	-6.41558	-7.21112	5.20612	6.89808	-5.18907	-21.7749	10.3853	-2.68391	-28.7712
1.16	-3.79177	-17.4013	-23.6704	-14.702	-0.434518	1.1717	2.29907	23.0395	-1.68771	-9.20711	-13.9476	-21.6976	5.04003			-27.8741	16.42	21.4699	3.15585	-6.29058	-7.22316	5.21696	7.07291	-5.21811	-21.9152	10.4233	-2.61016	-28.8691
1.162	-3.71302	-17.4103	-23.5328	-14.6718	-0.442946	1.20702	2.32385	23.2335	-1.68588	-9.21413	-13.8854	-21.7642	4.78505			-28.0011	16.2812	21.6782	3.03003	-6.22385	-7.19138	5.24782	7.25024	-5.29005	-22.0312	10.481	-2.48356	-28.9776
1.164	-3.85981	-17.427	-23.3872	-14.6491	-0.46564	1.19678	2.32522	23.4143	-1.66368	-9.28801	-13.8098	-21.735	4.6587			-28.0546	16.2193	21.8077	2.93296	-6.20343	-7.12932	5.282	7.39792	-5.33522	-22.2706	10.5355	-2.32943	-29.0738
1.166	-4.12129	-17.5203	-23.2967	-14.632	-0.44513	1.16938	2.31518	23.556	-1.65988	-9.30566	-13.7089	-21.7548	4.60741			-28.1215	16.1505	21.7621	2.91624	-6.23108	-7.11413	5.29864	7.51159	-5.45042	-22.2676	10.5894	-2.19463	-29.1607
1.168	-4.40321	-17.6475	-23.3309	-14.6606	-0.43078	1.11076	2.32273	23.6947	-1.6094	-9.33391	-13.5848	-21.7958	4.6592			-28.1818	15.9899	21.6914	3.02057	-6.28194	-7.10605	5.29897	7.54576	-5.45304	-22.4015	10.6762	-2.08445	-29.1746
1.17	-4.54216	-17.7789	-23.4408	-14.718	-0.423598	1.02565	2.32371	23.7395	-1.5526	-9.42402	-13.5273	-21.8215	4.7865			-28.3442	15.64	21.6273	3.17304	-6.36339	-7.16363	5.26065	7.48798	-5.37559	-22.6563	10.7514	-1.92905	-29.186
1.172	-4.55844	-17.7973	-23.6087	-14.7739	-0.409962	0.92512	2.36503	23.763	-1.50156	-9.37597	-13.4988	-21.876	4.96775			-28.4779	15.3469	21.4597	3.38579	-6.42179	-7.21867	5.20944	7.44566	-5.28991	-22.6505	10.8053	-1.86102	-29.1971
1.174	-4.53163	-17.8563	-23.8029	-14.8667	-0.397516	0.843192	2.40762	23.7088	-1.52151	-9.39705	-13.537	-21.9947	5.24944			-28.5446	15.1651	21.3236	3.60375	-6.41581	-7.27132	5.16291	7.3948	-5.12009	-22.8052	10.8567	-1.77901	-29.1396
1.176	-4.45269	-17.8437	-24.0336	-14.9188	-0.393806	0.746396	2.45363	23.6121	-1.52956	-9.41744	-13.5775	-22.1241	5.48698			-28.5031	15.0724	21.1355	3.75803	-6.3966	-7.30155	5.13177	7.39703	-4.91665	-22.9588	10.868	-1.7474	-29.0466
1.178	-4.35011	-17.8811	-24.2472	-14.9195	-0.387576	0.64869	2.49936	23.4242	-1.54916	-9.41233	-13.6298	-22.1558	5.66219			-28.374	14.9733	20.9847	3.81039	-6.36199	-7.31977	5.0955	7.38914	-4.79949	-23.0873	10.9081	-1.74839	-29.0028
1.18	-4.19646	-17.8851	-24.5009	-14.8423	-0.364924	0.569744	2.52017	23.1915	-1.56832	-9.3966	-13.683	-22.1423	5.7941			-28.2354	14.7681	20.8699	3.80495	-6.29331	-7.32719	5.0989	7.44916	-4.71727	-23.1167	10.91	-1.77233	-28.9858
1.182	-3.96487	-17.9085	-24.7478	-14.7553	-0.339374	0.521612	2.48573	23.0105	-1.46117	-9.38594	-13.7525	-22.1082	5.749			-28.1812	14.4995	20.818	3.74258	-6.20928	-7.32571	5.16174	7.54669	-4.65063	-23.0956	10.8629	-1.8349	-29.0277
1.184	-3.76198	-17.8861	-24.9302	-14.774	-0.300552	0.512848	2.42089	22.988	-1.44628	-9.38151	-13.808	-21.9848	5.50014			-28.2642	14.2881	20.7443	3.58168	-6.14844	-7.33153	5.22875	7.64182	-4.58654	-23.0148	10.7779	-1.85336	-29.0684
1.186	-3.6192	-17.7621	-25.0572	-14.7925	-0.284116	0.533358	2.33822	23.0174	-1.47392	-9.39565	-13.835	-21.8341	5.233			-28.3057	14.2814	20.5868	3.40379	-6.10249	-7.33394	5.27818	7.66741	-4.5541	-22.9411	10.6655	-1.89773	-29.1242
1.188	-3.55564	-17.5816	-25.0418	-14.8267	-0.278838	0.629398	2.29753	23.0687	-1.45209	-9.46452	-13.7796	-21.7194	5.08316			-28.3268	14.3682	20.4926	3.17283	-5.98956	-7.3425	5.33652	7.62535	-4.57778	-22.7758	10.6208	-1.82434	-29.2035
1.19	-3.68329	-17.4735	-24.9346	-14.8619	-0.274834	0.727734	2.26366	23.1597	-1.49449	-9.5375	-13.6846	-21.668	5.05886			-28.3708	14.3835	20.278	2.94896	-5.95379	-7.35329	5.37579	7.65544	-4.6508	-22.6814	10.6012	-1.76593	-29.3071
1.192	-4.00624	-17.4167	-24.7523	-14.9016	-0.296954	0.780752	2.27308	23.3364	-1.50417	-9.5268	-13.5722	-21.6861	5.18213			-28.3081	14.2473	20.0682	2.7699	-5.87937	-7.31434	5.37153	7.7967	-4.79653	-22.639	10.6233	-1.70314	-29.3955
1.194	-4.28883	-17.5066	-24.6681	-14.9265	-0.30807	0.80346	2.29281	23.4914	-1.55715	-9.50247	-13.4872	-21.7007	5.32876			-28.3005	14.0794	19.8808	2.65761	-5.88165	-7.28059	5.34626	7.93505	-4.92082	-22.701	10.671	-1.58	-29.497
1.196	-4.43624	-17.6537	-24.8025	-14.878	-0.362922	0.789824	2.34196	23.5552	-1.56605	-9.48821	-13.3754	-21.6951	5.55017			-28.3917	13.8912	19.7919	2.56395	-5.91629	-7.27021	5.33618	8.00962	-4.98065	-22.8072	10.6925	-1.50639	-29.5706
1.198	-4.46083	-17.7706	-25.1474	-14.8072	-0.396508	0.750134	2.38952	23.6506	-1.52261	-9.51408	-13.2732	-21.6884	5.85494			-28.4738	13.554	19.8085	2.58801	-5.93902	-7.27367	5.33117	7.9444	-5.05308	-22.9086	10.7469	-1.40413	-29.5913
1.2	-4.41242	-17.8505	-25.4368	-14.773	-0.399168	0.699426	2.49726	23.684	-1.49719	-9.53431	-13.1774	-21.6856	6.08276			-28.3859	13.0603	20.0657	2.6371	-5.98956	-7.28139	5.32168	7.90831	-5.06668	-23.0217	10.7834	-1.2888	-29.5546
1.202	-4.41269	-17.9294	-25.618	-14.817	-0.41769	0.645512	2.58629	23.7159	-1.4243	-9.55031	-13.0692	-21.6582	6.23955			-28.2365	12.5029	20.2817	2.72048	-6.04386	-7.28931	5.30944	7.88327	-5.0671	-23.2486	10.8203	-1.18497	-29.5896
1.204	-4.3512	-17.9707	-25.7741	-14.8775	-0.438046	0.576814	2.66405	23.7519	-1.43836	-9.58047	-12.9741	-21.6819	6.29222			-28.1225	12.0633	20.2419	2.80249	-6.03855	-7.2974	5.27444	7.84024	-5.00382	-23.4143	10.8318	-1.05997	-29.6411
1.206	-4.2474	-17.9965	-25.9076	-14.9908	-0.462378	0.478842	2.72124	23.64	-1.45107	-9.6483	-12.8825	-21.6873	6.13354			-28.1007	11.7675	19.8957	2.93147	-6.06137	-7.2963	5.24762	7.82786	-4.9313	-23.6007	10.8723	-0.901684	-29.6517
1.208	-4.13938	-18.0189	-25.984	-15.0067	-0.47866	0.386722	2.72692	23.4162	-1.48593	-9.71281	-12.8003	-21.719	5.89061			-28.0925	11.7049	19.5732	3.05005	-6.02048	-7.29417	5.23293	7.80024	-4.84828	-23.7542	10.9132	-0.754684	-29.6439
1.21	-3.94793	-18.0219	-25.8825	-14.9951	-0.473298	0.290402	2.66304	23.1551	-1.50371	-9.78488	-12.6883	-21.8075	5.62149			-28.1499	11.7659	19.2346	3.13107	-5.9837	-7.27427	5.27136	7.83749	-4.75378	-23.9035	10.9315	-0.711466	-29.6044
1.212	-3.77206	-17.9956	-25.8146	-14.9642	-0.413686	0.225498	2.5583	23.0801	-1.5407	-9.81782	-12.5575	-21.9091	5.55366			-28.2301	11.9142	18.9743	3.1089	-5.97286	-7.25729	5.35321	8.01528	-4.68287	-24.0325	10.9804	-0.72912	-29.6384
1.214	-3.65877	-17.9688	-25.832	-15.0203	-0.372764	0.203686	2.44826	23.1028	-1.57937	-9.85505	-12.4438	-22.0171	5.62969			-28.2824	12.0648	18.817	3.00362	-5.92224	-7.26771	5.42731	8.23108	-4.63014	-24.1769	11.0086	-0.827386	-29.6503
1.216	-3.5488	-18.0817	-25.9814	-15.0472	-0.309218	0.227906	2.37555	23.1546	-1.62952	-9.91011	-12.3281	-22.0274	5.71788			-28.3525	12.2568	18.8633	2.88446	-5.9137	-7.29352	5.46097	8.38958	-4.55056	-24.3128	11.0499	-0.922054	-29.6364
1.218	-3.54669	-18.1855	-26.1955	-15.0644	-0.303492	0.285432	2.33299	23.1591	-1.69322	-9.9786	-12.2919	-21.966	5.81273			-28.3691	12.4085	19.0112	2.7819	-5.85325	-7.36757	5.46181	8.57496	-4.52481	-24.4684	11.1269	-1.0206	-29.591
1.22	-3.72177	-18.1995	-26.3231	-15.0803	-0.299572	0.3472	2.33015	23.1868	-1.7589	-10.0232	-12.327	-21.8484	5.90488			-28.3772	12.3815	19.2693	2.7043	-5.79965	-7.43113	5.45168	8.61746	-4.43471	-24.618	11.1915	-1.08979	-29.5736
1.222	-3.95651	-18.2163	-26.4418	-15.0728	-0.290892	0.392728	2.36228	23.2485	-1.81658	-10.1012	-12.37	-21.6806	6.03428			-28.3323	12.0618	19.431	2.63918	-5.73686	-7.43765	5.43677	8.51397	-4.36586	-24.7552	11.2236	-1.08867	-29.5987
1.224	-4.21634	-18.2037	-26.6034	-15.068	-0.297612	0.396452	2.4366	23.3092	-1.88516	-10.1993	-12.4269	-21.5779	6.15006			-28.3269	11.6508	19.2934	2.53438	-5.65996	-7.392	5.44347	8.33675	-4.31466	-24.8704	11.2758	-0.961744	-29.7636
1.226	-4.34641	-18.2148	-26.7887	-15.0582	-0.31185	0.364938	2.48518	23.4268	-1.95159	-10.221	-12.4516	-21.5538	6.26548			-28.3186	11.326	18.914	2.47771	-5.6103	-7.3508	5.44389	8.20845	-4.23713	-24.8659	11.3402	-0.811986	-29.9879
1.228	-4.41077	-18.1635	-26.9431	-15.0057	-0.351904	0.316694	2.53963	23.5014	-2.01852	-10.1804	-12.4753	-21.4975	6.41176			-28.3862	10.973	18.4791	2.40248	-5.56051	-7.33109	5.44718	8.15805	-4.18166	-24.7233	11.3099	-0.620984	-30.2358
1.23	-4.4232	-18.1013	-26.9946	-14.958	-0.399056	0.234542	2.61192	23.5554	-2.06975	-10.0945	-12.5157	-21.4512	6.54338			-28.3279	10.7514	18.1303	2.40687	-5.50868	-7.30352	5.44127	8.15329	-4.09266	-24.5601	11.2226	-0.520366	-30.4761
1.232	-4.39201	-17.9834	-27.0965	-14.9727	-0.45752	0.133952	2.65216	23.5025	-2.12467	-9.97819	-12.4466	-21.4544	6.66725			-28.1801	10.5726	17.9374	2.43317	-5.5223	-7.2526	5.44926	8.12063	-4.04037	-24.4646	11.1058	-0.450114	-30.6625
1.234	-4.32723	-17.8768	-27.1981	-14.9533	-0.472724	0.034482	2.74366	23.4154	-2.18358	-9.8912	-12.3208	-21.4083	6.84379			-28.085	10.4289	17.9602	2.45343	-5.53532	-7.21949	5.43635	8.08706	-3.94612	-24.3953	10.9962	-0.330918	-30.8005
1.236	-4.25533	-17.8678	-27.244	-14.9446	-0.497448	-0.079282	2.83074	23.2695	-2.30013	-9.88501	-12.258	-21.4158	6.99469			-28.1096	10.3432	18.1024	2.50277	-5.58275	-7.19398	5.41043	8.08487	-3.87234	-24.3431	10.9123	-0.28231	-30.8406
1.238	-4.155	-18.0335	-27.2804	-14.9343	-0.440006	-0.137998	2.91218	23.194	-2.38245	-9.93329	-12.1968	-21.3672	7.09486			-28.21	10.2888	18.3658	2.54677	-5.64455	-7.18005	5.3815	8.20491	-3.83351	-24.3182	10.8556	-0.205366	-30.8366
1.24	-4.07135	-18.2984	-27.3276	-14.9753	-0.370678	-0.159208	2.94892	23.1966	-2.44254	-9.99375	-12.1134	-21.3433	7.1997			-28.2763	10.1762	18.6223	2.58112	-5.73616	-7.18014	5.33932	8.40512	-3.83162	-24.3548	10.8131	-0.178976	-30.7979
1.242	-3.97541	-18.4469	-27.4268	-15.0278	-0.338184	-0.151032	2.94896	23.2548	-2.45872	-10.054	-12.0779	-21.342	7.22807			-28.3394	10.0001	18.6357	2.62864	-5.79036	-7.20642	5.33567	8.60469	-3.90096	-24.4622	10.7722	-0.132888	-30.8309
1.244	-3.8074	-18.566	-27.5143	-15.0724	-0.351848	-0.08841	2.90373	23.2988	-2.457	-10.1317	-12.1008	-21.3345	7.12344			-28.4306	9.84287	18.3991	2.64887	-5.80157	-7.27037	5.36091	8.79773	-3.9802	-24.5731	10.717	-0.072506	-30.8277
1.246	-3.57897	-18.623	-27.637	-15.0935	-0.353878	-0.031584	2.84477	23.3876	-2.4376	-10.2229	-12.1164	-21.307	6.88982			-28.5757	9.82185	17.9756	2.70987	-5.83184	-7.33933	5.43326	8.99377	-4.03298	-24.7102	10.6263	-0.013692	-30.8092
1.248	-3.37154	-18.5087	-27.8836	-15.0965	-0.356146	0.001624	2.74855	23.4414	-2.41387	-10.302	-12.1014	-21.2759	6.62619			-28.6985	9.9883	17.5845	2.70935	-5.84756	-7.37239	5.50508	9.16684	-4.04515	-24.8548	10.558	0.131348	-30.7681
1.25	-3.32095	-18.2436	-28.1672	-15.0966	-0.348614	0.032788	2.68167	23.4859	-2.31577	-10.3802	-12.1456	-21.2845	6.43933			-28.6874	10.0828	17.2974	2.68414	-5.82936	-7.36561	5.51711	9.36716	-4.0376	-24.9828	10.4968	0.233422	-30.7492
1.252	-3.30709	-18.072	-28.4021	-15.0995	-0.344876	-0.019194	2.65023	23.5779	-2.20322	-10.4474	-12.2302	-21.3179	6.40927			-28.7077	10.011	17.0731	2.6432	-5.77238	-7.34962	5.51009	9.56367	-3.97398	-25.1	10.4823	0.333704	-30.7444
1.254	-3.32739	-18.0782	-28.4145	-15.1121	-0.369796	-0.083412	2.67995	23.605	-2.10876	-10.6109	-12.2941	-21.4189	6.43189			-28.7372	9.79009	17.0393	2.54983	-5.6909	-7.36758	5.4938	9.66335	-3.85785	-25.3039	10.5645	0.405496	-30.7649
1.256	-3.37053	-18.2611	-28.4216	-15.107	-0.38115	-0.147392	2.71184	23.6989	-2.07011	-10.5544	-12.3484	-21.5308	6.43847			-28.7507	9.53215	17.0979	2.49035	-5.63368	-7.34761	5.49301	9.68344	-3.70412	-25.3523	10.6558	0.418334	-30.7094
1.258	-3.39202	-18.3693	-28.2988	-15.1089	-0.410438	-0.216832	2.77773	23.7542	-2.01792	-10.6021	-12.4211	-21.632	6.49018			-28.7946	9.13419	17.2962	2.44791	-5.57327	-7.30754	5.46451	9.72401	-3.57934	-25.537	10.8181	0.326662	-30.6563
1.26	-3.39742	-18.4419	-28.1619	-15.1133	-0.470148	-0.289842	2.84057	23.7896	-1.95639	-10.491	-12.4407	-21.7138	6.56851			-28.8348	8.71128	17.6177	2.38748	-5.48775	-7.24115	5.46942	9.68849	-3.50489	-25.4343	10.9391	0.250194	-30.6989
1.262	-3.3882	-18.5212	-27.9983	-15.0973	-0.504966	-0.34426	2.88012	23.7743	-1.86297	-10.492	-12.4463	-21.7329	6.65295			-28.8822	8.1082	17.9334	2.30936	-5.446	-7.15357	5.48121	9.6228	-3.46633	-25.4485	10.9956	0.16534	-30.7998
1.264	-3.40157	-18.6237	-27.8848	-15.0877	-0.505022	-0.375984	2.9421	23.6507	-1.78259	-10.5546	-12.5155	-21.6532	6.7691			-28.8294	7.52466	18.1207	2.26972	-5.4244	-7.10493	5.48674	9.62088	-3.40484	-25.3285	10.9985	0.077952	-30.9472
1.266	-3.40823	-18.6091	-27.8448	-15.1263	-0.519428	-0.377972	3.00453	23.5349	-1.79852	-10.6289	-12.5304	-21.5224	6.88299			-28.7883	7.29863	18.1633	2.21806	-5.41366	-7.10933	5.49031	9.57135	-3.40999	-25.2137	10.9453	0.028784	-31.1323
1.268	-3.38804	-18.6534	-27.9763	-15.1352	-0.53249	-0.341362	3.05518	23.3108	-1.8367	-10.7101	-12.5249	-21.3786	7.05566			-28.7767	7.38898	18.0257	2.15984	-5.46064	-7.17186	5.49385	9.54184	-3.46373	-25.1516	10.8976	0.146342	-31.3014
1.27	-3.37061	-18.6008	-28.2744	-15.1115	-0.560868	-0.29463	3.12479	23.1063	-1.88427	-10.7896	-12.4486	-21.2399	7.21288			-28.7849	7.61358	17.8216	2.19268	-5.49735	-7.26046	5.47532	9.53764	-3.54026	-25.1856	10.8784	0.337974	-31.3841
1.272	-3.32384	-18.5556	-28.5302	-15.1081	-0.578382	-0.26425	3.19584	23.056	-1.95027	-10.8204	-12.3588	-21.1417	7.39768			-28.7882	7.83129	17.6831	2.24769	-5.51876	-7.29065	5.45497	9.60063	-3.64963	-25.2509	10.8378	0.487564	-31.3974
1.274	-3.3318	-18.6618	-28.8232	-15.1285	-0.604338	-0.245994	3.2668	22.9807	-2.03988	-10.8143	-12.2602	-21.0033	7.48707			-28.7858	8.03951	17.6078	2.30031	-5.56195	-7.2756	5.42375	9.58131	-3.75199	-25.3543	10.8471	0.64995	-31.376
1.276	-3.35303	-18.7648	-29.0298	-15.1176	-0.632702	-0.259784	3.28572	22.9182	-2.02867	-10.8825	-12.2039	-20.9212	7.60351			-28.7783	8.19988	17.5283	2.26881	-5.62271	-7.23085	5.4028	9.56581	-3.8471	-25.5275	10.8245	0.77973	-31.3673
1.278	-3.38185	-18.7691	-29.0848	-15.0398	-0.680162	-0.298844	3.26074	22.9037	-1.9896	-11.0742	-12.1584	-20.8223	7.63321			-28.8202	8.16929	17.3938	2.32313	-5.64498	-7.19715	5.38731	9.60824	-3.89445	-25.8076	10.8014	0.939386	-31.3595
1.28	-3.43248	-18.7912	-28.9277	-14.9616	-0.687638	-0.345338	3.22924	22.9419	-1.9272	-11.0323	-12.0815	-20.7183	7.52549			-28.8342	7.83618	17.269	2.37728	-5.65964	-7.14171	5.38213	9.66998	-3.88475	-25.9176	10.8128	1.0631	-31.3647
1.282	-3.40864	-18.8536	-28.6546	-14.8798	-0.70854	-0.424382	3.18896	23.0262	-1.88321	-11.0322	-12.0302	-20.6491	7.34138			-28.8694	7.34741	17.1033	2.39229	-5.6492	-7.10389	5.41521	9.68885	-3.80468	-26.0545	10.7897	1.21481	-31.3732
1.284	-3.40641	-18.9107	-28.4848	-14.8643	-0.715792	-0.50652	3.14878	23.1592	-1.94006	-10.9743	-11.977	-20.5519	7.0512			-28.9136	6.79988	16.9239	2.43512	-5.62661	-7.03031	5.44761	9.7096	-3.75084	-26.0705	10.7473	1.34012	-31.3875
1.286	-3.38566	-18.9674	-28.4766	-14.8711	-0.729316	-0.594398	3.09557	23.2942	-1.93168	-10.9417	-11.9047	-20.4907	6.75758			-28.9865	6.36128	16.803	2.44913	-5.59804	-6.97623	5.4733	9.69646	-3.66957	-26.0348	10.7457	1.47384	-31.4115
1.288	-3.33516	-18.9953	-28.609	-14.918	-0.763896	-0.642362	3.03192	23.4161	-1.96784	-10.9812	-11.8584	-20.4794	6.64152			-29.0741	6.04694	16.7285	2.44786	-5.57915	-6.96808	5.4759	9.69895	-3.57739	-25.9339	10.7127	1.64759	-31.5239
1.29	-3.28755	-18.9346	-28.7648	-14.9688	-0.76678	-0.674422	3.02532	23.3935	-2.00859	-11.0612	-11.7963	-20.5349	6.65755			-29.1482	6.02795	16.7546	2.42771	-5.54974	-6.97729	5.45639	9.68374	-3.52918	-25.8284	10.6834	1.75431	-31.5866
1.292	-3.21348	-18.908	-28.9306	-14.9978	-0.709002	-0.663586	3.05089	23.3164	-2.04991	-11.1334	-11.7274	-20.5978	6.70814			-29.2223	5.9988	16.9268	2.39816	-5.55247	-6.98309	5.45392	9.60487	-3.40785	-25.7056	10.6968	1.81929	-31.6031
1.294	-3.1548	-18.9188	-29.2137	-15.0534	-0.615776	-0.61726	3.09441	23.1539	-2.10686	-11.2129	-11.6723	-20.7123	6.75094			-29.2608	5.931	17.0202	2.35445	-5.50593	-7.01886	5.45233	9.51971	-3.32394	-25.6998	10.6512	1.77246	-31.6298
1.296	-3.13554	-19.146	-29.5292	-15.0881	-0.522858	-0.548296	3.14238	23.023	-2.18369	-11.2612	-11.6167	-20.6561	6.86792			-29.3544	6.13045	16.9284	2.27721	-5.47348	-7.07293	5.45182	9.54519	-3.25422	-25.7607	10.6512	1.61319	-31.6936
1.298	-3.12903	-19.4745	-29.8119	-15.1332	-0.427476	-0.498974	3.21299	22.973	-2.24491	-11.2324	-11.55	-20.5263	7.07141			-29.3812	6.48148	16.7786	2.22986	-5.47219	-7.10767	5.44494	9.71303	-3.15627	-25.8324	10.6144	1.34957	-31.7053
1.3	-3.06009	-19.8512	-30.0932	-15.1695	-0.371616	-0.448518	3.27597	23.0153	-2.29974	-11.2699	-11.4502	-20.3783	7.25449			-29.3949	6.76043	16.6363	2.16602	-5.48232	-7.08987	5.44671	9.89573	-3.03328	-25.9781	10.5975	1.17306	-31.6821
1.302	-3.02224	-20.0921	-30.2198	-15.1733	-0.36743	-0.425628	3.33386	23.0408	-2.3737	-11.3719	-11.3449	-20.2872	7.43827			-29.3416	6.69872	16.5303	2.0966	-5.54915	-7.07538	5.44415	10.1109	-2.91092	-26.1525	10.577	1.07758	-31.6173
1.304	-3.01675	-20.1216	-30.1927	-15.1803	-0.441252	-0.41433	3.40801	23.0587	-2.42998	-11.4034	-11.2868	-20.2366	7.60431			-29.2366	6.52982	16.412	2.04728	-5.52707	-7.07129	5.45425	10.2808	-2.80412	-26.3246	10.5795	1.05813	-31.6107
1.306	-2.91347	-19.9268	-29.9047	-15.1758	-0.541366	-0.41867	3.47033	23.112	-2.50793	-11.4036	-11.1899	-20.2871	7.6687			-29.2071	6.41918	16.1962	1.99573	-5.5061	-7.05531	5.47611	10.408	-2.71866	-26.4592	10.6121	1.07535	-31.6295
1.308	-2.88921	-19.6713	-29.5406	-15.1489	-0.62846	-0.477176	3.50468	23.1318	-2.54401	-11.3701	-11.1328	-20.4661	7.54372			-29.164	6.3334	15.9778	1.94267	-5.48475	-7.03109	5.50971	10.5344	-2.57611	-26.4942	10.6818	1.11839	-31.6279
1.31	-2.89818	-19.4873	-29.425	-15.1208	-0.760046	-0.548772	3.48463	23.1494	-2.61152	-11.3503	-11.1148	-20.712	7.33789			-29.1714	6.37361	15.7803	1.91722	-5.44876	-7.02167	5.52237	10.6357	-2.49544	-26.4541	10.7114	1.18052	-31.6162
1.312	-2.9332	-19.4618	-29.6	-15.0295	-0.827344	-0.606578	3.44947	23.2191	-2.62249	-11.3957	-11.1142	-21.0026	7.08208			-29.1579	6.35435	15.6977	1.91124	-5.43102	-7.01152	5.52353	10.7342	-2.34672	-26.3556	10.7907	1.22389	-31.6115
1.314	-2.98834	-19.6133	-29.8704	-14.962	-0.874622	-0.66066	3.42273	23.2865	-2.59322	-11.4702	-11.1018	-21.2462	6.91317			-29.1646	6.28205	15.7414	1.92569	-5.41849	-6.95797	5.52742	10.8407	-2.21956	-26.2243	10.8237	1.23194	-31.6097
1.316	-3.03215	-19.8601	-30.0945	-14.9454	-0.866992	-0.721966	3.37418	23.3259	-2.58125	-11.5581	-11.1167	-21.2822	6.83262			-29.1814	6.14068	16.0114	1.9444	-5.43052	-6.88932	5.52041	10.8991	-2.19384	-26.1792	10.8584	1.18793	-31.6326
1.318	-3.09798	-20.0853	-30.3189	-14.9392	-0.796292	-0.792484	3.36553	23.4274	-2.58755	-11.6028	-11.255	-21.2063	6.84874			-29.1909	6.06677	16.2241	1.95553	-5.42867	-6.81554	5.47427	10.9261	-2.16896	-26.1898	10.8602	1.12902	-31.6614
1.32	-3.22858	-20.3637	-30.4313	-14.9407	-0.71673	-0.827862	3.35721	23.5088	-2.55823	-11.6216	-11.3424	-21.055	6.8875			-29.2186	5.93092	16.2345	1.97351	-5.39858	-6.76367	5.42784	10.8631	-2.19803	-26.2347	10.8172	1.12643	-31.6863
1.322	-3.29129	-20.548	-30.4639	-14.9991	-0.625198	-0.856352	3.34288	23.5255	-2.57628	-11.5921	-11.3633	-20.9571	6.93946			-29.2177	5.61221	16.0901	2.02731	-5.39475	-6.72308	5.41859	10.7914	-2.22174	-26.2948	10.7454	1.23042	-31.6593
1.324	-3.34124	-20.6847	-30.383	-15.0806	-0.511798	-0.855218	3.30284	23.463	-2.54464	-11.6209	-11.3128	-20.8584	7.03227			-29.1841	5.18823	15.8481	2.05563	-5.35857	-6.73816	5.45531	10.7049	-2.29631	-26.3841	10.7014	1.32198	-31.7024
1.326	-3.34408	-20.7269	-30.1817	-15.2469	-0.475272	-0.836808	3.28259	23.3003	-2.53812	-11.7171	-11.2476	-20.7527	7.11649			-29.1551	4.96791	15.627	2.10967	-5.35814	-6.79595	5.49518	10.7027	-2.40597	-26.5097	10.6496	1.4677	-31.8471
1.328	-3.34109	-20.6615	-29.9607	-15.4447	-0.486038	-0.83167	3.27275	23.0988	-2.54663	-11.7929	-11.1951	-20.616	7.2722			-29.1792	4.9398	15.361	2.0992	-5.343	-6.88054	5.53143	10.5885	-2.49371	-26.6339	10.598	1.62186	-31.9273
1.33	-3.32517	-20.5412	-29.9563	-15.5298	-0.499422	-0.818608	3.27634	22.9153	-2.52822	-11.7975	-11.1048	-20.4924	7.46535			-29.1759	5.1582	15.2199	2.05751	-5.33128	-6.92726	5.54841	10.7165	-2.59864	-26.7626	10.5473	1.77624	-32.0164
1.332	-3.30665	-20.3939	-30.1331	-15.527	-0.575484	-0.779058	3.30257	22.8729	-2.51916	-11.7906	-10.9898	-20.3484	7.64694			-29.2278	5.45301	15.1798	2.05621	-5.3004	-6.91785	5.59012	10.8682	-2.67106	-26.8708	10.4892	1.95203	-32.0265
1.334	-3.26823	-20.261	-30.4227	-15.4798	-0.642376	-0.740446	3.33609	22.7942	-2.41346	-11.7678	-10.8987	-20.2314	7.76511			-29.2625	5.59012	15.3439	2.00969	-5.26239	-6.88708	5.61224	11.0139	-2.69798	-26.8742	10.4528	2.08583	-32.0483
1.336	-3.24097	-20.1122	-30.6375	-15.4021	-0.7196	-0.75362	3.40875	22.7293	-2.35389	-11.7656	-10.8181	-20.1225	7.8639			-29.3196	5.72223	15.6317	1.91607	-5.21744	-6.85992	5.63875	11.0664	-2.70487	-26.7822	10.4286	2.24748	-32.0645
1.338	-3.21332	-20.1139	-30.834	-15.3627	-0.782432	-0.807772	3.4701	22.6772	-2.32869	-11.8037	-10.7415	-19.998	7.86503			-29.3409	5.89509	15.8785	1.82634	-5.2093	-6.80646	5.65691	11.0929	-2.67617	-26.624	10.3546	2.39637	-32.0442
1.34	-3.17244	-20.1786	-30.9578	-15.2979	-0.778484	-0.869344	3.50564	22.6375	-2.32609	-11.8796	-10.6554	-19.8673	7.75446			-29.43	5.80945	15.9163	1.77272	-5.19287	-6.75818	5.66639	10.9709	-2.68906	-26.5137	10.2992	2.56326	-32.026
1.342	-3.10799	-20.258	-31.1341	-15.2282	-0.77469	-0.9191	3.57974	22.733	-2.28375	-11.9444	-10.5687	-19.7536	7.69174			-29.5171	5.57459	15.6409	1.70208	-5.19512	-6.70404	5.66455	10.8495	-2.64999	-26.4913	10.262	2.79483	-32.0713
1.344	-3.03653	-20.388	-31.2205	-15.1659	-0.736778	-0.98385	3.66579	22.8859	-2.27604	-11.9859	-10.4652	-19.6672	7.65825			-29.563	5.20607	15.2568	1.66464	-5.17314	-6.61368	5.6649	10.8032	-2.61888	-26.5321	10.2239	2.95694	-32.1517
1.346	-2.98026	-20.4825	-31.2177	-15.0958	-0.644588	-1.02801	3.7457	23.0863	-2.29443	-11.9762	-10.3588	-19.6601	7.67577			-29.6278	4.82877	14.9518	1.65313	-5.12999	-6.53366	5.64908	10.8516	-2.54768	-26.6278	10.1584	3.11679	-32.2859
1.348	-2.92442	-20.5813	-31.3072	-15.0633	-0.521822	-1.06903	3.79343	23.1658	-2.29842	-11.9423	-10.2999	-19.6944	7.61281			-29.659	4.62522	14.777	1.65858	-5.11269	-6.48234	5.63157	10.8389	-2.57271	-26.7591	10.1088	3.24716	-32.451
1.35	-2.87489	-20.6347	-31.3937	-15.0611	-0.47698	-1.09533	3.80393	23.1834	-2.32025	-11.8979	-10.1897	-19.7529	7.4592			-29.6761	4.55445	14.7736	1.69119	-5.13972	-6.46556	5.62583	10.8362	-2.5335	-26.9061	10.0523	3.31491	-32.6205
1.352	-2.8853	-20.6546	-31.4792	-15.0627	-0.486052	-1.09221	3.77154	23.112	-2.32914	-11.8632	-10.0822	-19.8367	7.30022			-29.6082	4.60685	14.9382	1.70631	-5.18041	-6.4602	5.6166	10.7484	-2.50131	-27.0246	10.0144	3.33458	-32.7499
1.354	-2.83809	-20.5889	-31.5185	-15.0627	-0.487662	-1.07723	3.74473	23.0402	-2.36235	-11.8361	-9.97821	-19.8507	7.19223			-29.568	4.66701	15.2419	1.72511	-5.21482	-6.48628	5.61961	10.8526	-2.48037	-27.0676	9.95645	3.30553	-32.8261
1.356	-2.82208	-20.4898	-31.5079	-15.1003	-0.517622	-1.05573	3.68364	22.9694	-2.36699	-11.8627	-9.88796	-19.7019	7.11892			-29.5492	4.64869	15.5741	1.75477	-5.21937	-6.54566	5.66583	10.9628	-2.41122	-27.0124	9.9338	3.12756	-32.9175
1.358	-2.78617	-20.3998	-31.5359	-15.1804	-0.569506	-0.997766	3.59453	22.9795	-2.40526	-11.9409	-9.79829	-19.5363	7.19177			-29.519	4.73798	15.7584	1.82409	-5.17902	-6.61101	5.69551	11.2081	-2.38769	-26.9082	9.94911	2.85555	-32.8917
1.36	-2.77028	-20.3631	-31.5741	-15.2895	-0.66017	-0.928242	3.51569	22.9263	-2.43862	-12.0434	-9.69604	-19.3351	7.37324			-29.544	4.94393	15.6901	1.85217	-5.15064	-6.65207	5.7038	11.3713	-2.33394	-26.8531	9.98284	2.69588	-32.6695
1.362	-2.85156	-20.2962	-31.6408	-15.4212	-0.763	-0.89796	3.4902	22.9196	-2.44954	-12.1248	-9.69153	-19.2506	7.56333			-29.5362	5.08175	15.3868	1.90267	-5.13069	-6.64899	5.6989	11.572	-2.24365	-26.8341	10.0825	2.60473	-32.3912
1.364	-2.90184	-20.2227	-31.7818	-15.5009	-0.747488	-0.879508	3.49822	22.8866	-2.47076	-12.1522	-9.69569	-19.2173	7.73683			-29.5284	5.0458	15.1298	1.97296	-5.13384	-6.64343	5.72212	11.7779	-2.16517	-26.8458	10.2424	2.56311	-32.1606
1.366	-2.95393	-20.194	-31.9588	-15.4954	-0.690228	-0.890862	3.51884	22.8774	-2.50991	-12.1195	-9.73281	-19.3383	7.91181			-29.5164	4.80631	14.8168	2.03557	-5.11101	-6.62771	5.72891	11.9149	-2.08177	-26.8744	10.3135	2.53492	-32.0457
1.368	-3.03134	-20.1488	-32.1148	-15.4625	-0.611254	-0.89796	3.56626	22.8874	-2.54156	-12.1539	-9.82339	-19.5451	7.97166			-29.5252	4.56908	14.5891	2.06681	-5.1043	-6.61076	5.74752	12.0575	-2.02327	-26.951	10.3016	2.5718	-31.9339
1.37	-3.05141	-20.0384	-32.185	-15.4248	-0.515816	-0.955654	3.60758	22.8768	-2.56903	-12.2816	-9.8952	-19.7368	7.97292			-29.4935	4.3744	14.5323	2.03763	-5.15596	-6.61907	5.76486	12.2644	-1.92525	-27.0878	10.2079	2.7039	-31.9031
1.372	-3.08015	-19.9614	-32.148	-15.3558	-0.442344	-1.01619	3.67034	22.85	-2.6077	-12.4141	-9.88935	-19.8912	7.92418			-29.4705	4.25411	14.619	1.97352	-5.16915	-6.5924	5.76054	12.3843	-1.82132	-27.2486	10.1182	2.79644	-31.9188
1.374	-3.09414	-19.9283	-32.0642	-15.3179	-0.42049	-1.07138	3.74269	22.792	-2.62027	-12.4657	-9.85692	-19.9633	7.9134			-29.4514	4.13777	14.9116	1.90282	-5.1742	-6.54528	5.75247	12.5509	-1.71144	-27.4251	10.0498	2.8558	-31.9937
1.376	-3.08512	-19.9496	-31.9271	-15.2736	-0.454692	-1.08968	3.82768	22.8066	-2.63722	-12.4872	-9.78215	-19.9528	7.89391			-29.4407	3.96659	15.2564	1.79273	-5.1548	-6.4876	5.74297	12.7993	-1.60311	-27.5474	9.96324	2.76529	-32.1271
1.378	-3.084	-20.0815	-31.8121	-15.2751	-0.547946	-1.12207	3.91216	22.7701	-2.71277	-12.4886	-9.70782	-19.8782	7.82566			-29.4302	3.95763	15.5473	1.69806	-5.12648	-6.41235	5.72386	13.0426	-1.50279	-27.5669	9.86145	2.71508	-32.2704
1.38	-3.09252	-20.2436	-31.6424	-15.2512	-0.621642	-1.14673	3.98289	22.78	-2.80458	-12.4829	-9.63721	-19.7075	7.71726			-29.449	4.1816	15.7172	1.58914	-5.05778	-6.31322	5.70437	13.2765	-1.45702	-27.5255	9.78424	2.78433	-32.4036
1.382	-3.07957	-20.4865	-31.6366	-15.2343	-0.731318	-1.16981	4.04988	22.7807	-2.874	-12.4913	-9.59434	-19.5713	7.55637			-29.45	4.49158	15.7139	1.45068	-5.04484	-6.25309	5.67232	13.3953	-1.44375	-27.4593	9.7502	2.87923	-32.5789
1.384	-3.06516	-20.7687	-31.7601	-15.1904	-0.840462	-1.16301	4.08071	22.8063	-2.90027	-12.5169	-9.54499	-19.4192	7.40323			-29.4618	4.52691	15.6545	1.34021	-5.04259	-6.2201	5.66082	13.4348	-1.48929	-27.3436	9.70376	3.02742	-32.821
1.386	-3.04702	-21.0113	-31.987	-15.1915	-0.883554	-1.18993	4.07686	22.8975	-2.97196	-12.5516	-9.4921	-19.3098	7.28027			-29.4948	4.38495	15.471	1.25647	-5.01757	-6.18453	5.67052	13.364	-1.50934	-27.2192	9.63196	3.16455	-33.0061
1.388	-3.01766	-21.0813	-32.2539	-15.1434	-0.888734	-1.1912	4.02611	22.9563	-2.99447	-12.5542	-9.45337	-19.2035	7.24549			-29.4897	4.15983	15.2552	1.15144	-4.9799	-6.2293	5.68635	13.2858	-1.55296	-27.1548	9.57886	3.30515	-33.081
1.39	-3.03293	-21.028	-32.5618	-15.0789	-0.815122	-1.20809	3.93715	22.9748	-2.97779	-12.5084	-9.41538	-19.0811	7.35491			-29.5117	3.93876	15.0876	1.08359	-4.9877	-6.31261	5.75527	13.1293	-1.59152	-27.1798	9.57753	3.44821	-32.9797
1.392	-3.06519	-20.8802	-32.8569	-15.0114	-0.713426	-1.23981	3.85325	22.8974	-2.92351	-12.4981	-9.35306	-18.9713	7.57603			-29.5331	3.92431	15.0011	1.06749	-4.99031	-6.38786	5.81477	12.9781	-1.63359	-27.2494	9.50096	3.58481	-32.7505
1.394	-3.06914	-20.6788	-32.9767	-14.9382	-0.601412	-1.21493	3.78685	22.8359	-2.82751	-12.5419	-9.28383	-18.8629	7.84419			-29.5265	3.94099	14.9226	1.05697	-4.97386	-6.43448	5.85393	12.873	-1.57196	-27.3337	9.41459	3.77943	-32.5702
1.396	-3.05917	-20.5166	-32.9163	-14.8905	-0.50624	-1.17012	3.7794	22.7056	-2.67642	-12.5901	-9.21973	-18.7445	8.04402			-29.5164	3.84664	14.8411	1.07715	-4.97207	-6.43437	5.8585	12.8988	-1.49246	-27.4244	9.36481	3.90324	-32.5463
1.398	-3.03754	-20.4647	-32.6003	-14.8789	-0.465906	-1.12938	3.78029	22.594	-2.57531	-12.657	-9.17185	-18.6665	8.1436			-29.5195	3.78363	14.7801	1.1199	-4.98751	-6.41686	5.86043	13.0098	-1.44418	-27.5521	9.29736	4.01264	-32.5222
1.4	-3.04051	-20.4631	-32.2665	-14.8781	-0.511644	-1.14052	3.82133	22.5298	-2.52897	-12.7204	-9.09863	-18.5725	8.1352			-29.5345	3.86316	14.594	1.14887	-5.00431	-6.3636	5.84977	13.1225	-1.39398	-27.6779	9.26464	4.12982	-32.4977
1.402	-3.02866	-20.5798	-32.0608	-14.8727	-0.592396	-1.17688	3.86205	22.4721	-2.44203	-12.7976	-9.03822	-18.4648	8.07204			-29.5301	3.93364	14.424	1.16635	-4.9632	-6.29803	5.85103	13.2352	-1.40736	-27.7542	9.26484	4.24883	-32.4999
1.404	-3.04434	-20.7872	-32.0547	-14.8869	-0.685552	-1.19469	3.8941	22.4388	-2.38801	-12.8981	-9.03808	-18.3656	8.02396			-29.5349	4.029	14.2602	1.2087	-4.94176	-6.25596	5.83468	13.3482	-1.38015	-27.8033	9.32425	4.40506	-32.5651
1.406	-3.00079	-21.0382	-32.2244	-14.979	-0.79464	-1.24474	3.95521	22.4559	-2.34396	-13.0358	-9.02738	-18.2633	7.92635			-29.4818	3.91915	14.2335	1.22867	-4.9105	-6.19371	5.81017	13.3565	-1.37554	-27.9062	9.38248	4.53141	-32.6742
1.408	-2.98644	-21.309	-32.4311	-15.1426	-0.843514	-1.25654	4.02212	22.4901	-2.32221	-13.1785	-8.99755	-18.1851	7.77869			-29.4341	3.72467	14.4298	1.17446	-4.90293	-6.10813	5.78346	13.3793	-1.37385	-28.031	9.46268	4.64159	-32.827
1.41	-2.95957	-21.4037	-32.6456	-15.3441	-0.878822	-1.29086	4.07642	22.7124	-2.35731	-13.281	-9.02514	-18.1227	7.61347			-29.3724	3.56012	14.6941	1.13274	-4.90022	-6.03075	5.76814	13.4196	-1.35087	-28.1234	9.50424	4.76295	-32.9865
1.412	-2.86747	-21.3751	-32.8363	-15.4586	-0.798728	-1.31156	4.12768	22.9421	-2.48021	-13.4155	-9.11658	-18.0995	7.45258			-29.3744	3.50694	14.9321	1.08941	-4.89292	-5.95573	5.75137	13.4285	-1.34653	-28.2051	9.55321	4.90563	-33.1809
1.414	-2.69107	-21.2564	-32.9516	-15.4674	-0.679364	-1.33921	4.17266	23.0861	-2.60208	-13.405	-9.19717	-18.1282	7.28024			-29.4087	3.61829	15.0126	1.13312	-4.88837	-5.91409	5.72862	13.4855	-1.38389	-28.2376	9.52612	5.05081	-33.3243
1.416	-2.48322	-21.0607	-32.9895	-15.4079	-0.546224	-1.34408	4.15587	23.1595	-2.71923	-13.2029	-9.19128	-18.1968	7.16703			-29.455	3.62445	14.8583	1.16382	-4.89563	-5.92362	5.74724	13.5992	-1.42751	-28.2205	9.42158	5.11154	-33.3749
1.418	-2.26824	-20.93	-32.9788	-15.3847	-0.458122	-1.17335	4.09714	23.1939	-2.80063	-13.0376	-9.16947	-18.2747	7.26296			-29.4918	3.53951	14.5973	1.1521	-4.89621	-5.66091	5.81123	13.6442	-1.40328	-28.1947	9.32263	5.11423	-33.3892
1.42	-2.15526	-20.8193	-32.957	-15.2845	-0.440048	-1.33553	4.01264	23.1377	-2.82821	-12.9179	-9.1499	-18.3319	7.5258			-29.4953	3.44813	14.3796	1.14733	-4.90955	-5.96684	5.90775	13.6241	-1.43389	-28.2184	9.2161	5.07737	-33.2515
1.422	-2.02318	-20.7372	-32.8824	-15.1293	-0.478142	-1.3147	3.96033	23.0355	-2.77613	-12.8593	-9.11695	-18.2778	7.8042			-29.4892	3.50736	14.0822	1.1387	-4.9006	-5.9745	5.98497	13.5551	-1.47157	-28.2217	9.11869	5.02645	-33.1314
1.424	-1.88654	-20.7284	-32.9589	-14.9485	-0.589904	-1.26232	3.92211	22.8811	-2.71814	-12.8599	-9.06643	-18.1051	8.01311			-29.4592	3.62699	13.7571	1.1101	-4.86237	-5.99544	6.03455	13.5132	-1.4533	-28.2213	9.04467	4.95534	-33.1219
1.426	-1.78402	-20.7336	-33.0736	-14.7868	-0.675248	-1.22277	3.91409	22.7757	-2.65572	-12.9146	-9.02062	-17.8707	8.1002			-29.4677	3.6436	13.5943	1.0624	-4.8502	-5.9871	6.03473	13.5998	-1.45362	-28.1809	8.95678	4.83125	-33.1412
1.428	-1.74738	-20.8267	-33.1624	-14.6724	-0.771554	-1.19727	3.93929	22.6448	-2.6157	-12.9101	-9.00803	-17.7324	8.05882			-29.5168	3.57641	13.5716	1.0058	-4.83686	-5.96732	6.01541	13.6679	-1.34502	-28.0615	8.88626	4.81244	-33.076
1.43	-1.7362	-20.9844	-33.2285	-14.6447	-0.83251	-0.958846	3.9934	22.5536	-2.58828	-12.8525	-8.90714	-17.6179	7.92887			-29.6171	3.29148	13.7494	0.992502	-4.81403	-5.74596	5.96802	13.7885	-1.24487	-27.9891	8.76428	4.82362	-33.0544
1.432	-1.72868	-21.2404	-33.2988	-14.633	-0.837508	-1.17162	4.06249	22.4624	-2.54888	-12.8007	-8.87001	-17.5559	7.73751			-29.724	3.05147	14.0288	0.96649	-4.83773	-5.95547	5.93869	13.8888	-1.17265	-27.9692	8.6539	4.84099	-33.0904
1.434	-1.75399	-21.5533	-33.3066	-14.6606	-0.791854	-1.17442	4.11533	22.3848	-2.53683	-12.8196	-8.80512	-17.5987	7.58925			-29.8054	2.85198	14.3478	0.991396	-4.82842	-5.96869	5.90617	13.9865	-1.05827	-28.0133	8.63708	4.80393	-33.1817
1.436	-1.68762	-21.9227	-33.2838	-14.7292	-0.683466	-1.19697	4.15842	22.3739	-2.51055	-12.8881	-8.7519	-17.7372	7.46364			-29.8217	2.69311	14.5061	1.03321	-4.83959	-5.97429	5.88587	14.0841	-0.948332	-28.0649	8.6239	4.80749	-33.3188
1.438	-1.67755	-22.2096	-33.2649	-14.883	-0.54488	-1.24379	4.16744	22.459	-2.48107	-13.0249	-8.70313	-17.8743	7.32313			-29.8159	2.48444	14.5794	1.01506	-4.86472	-5.97274	5.8715	14.0974	-0.819266	-28.1387	8.68679	4.86366	-33.3836
1.44	-1.6143	-22.3606	-33.2647	-15.0279	-0.446558	-1.05447	4.16721	22.6487	-2.46138	-13.1464	-8.71793	-18.1361	7.19568			-29.8041	2.24413	14.4863	0.951692	-4.8454	-5.74057	5.85754	13.9549	-0.715428	-28.2191	8.72852	4.86606	-33.4251
1.442	-1.55082	-22.3935	-33.4789	-15.1391	-0.42021	-1.36121	4.15265	22.8204	-2.47551	-13.2721	-8.70723	-18.4088	7.11113			-29.7972	2.18148	14.1567	1.0037	-4.83374	-5.97706	5.88736	13.7739	-0.598402	-28.3123	8.79885	4.84655	-33.4601
1.444	-1.45695	-22.3658	-33.7957	-15.1518	-0.483784	-1.43249	4.11215	23.0348	-2.44622	-13.4474	-8.73593	-18.5914	7.17462			-29.7474	2.25697	13.8095	1.06637	-4.80593	-5.96061	5.93928	13.6315	-0.439404	-28.4244	8.82939	4.87045	-33.5451
1.446	-1.36569	-22.3727	-34.0385	-15.1221	-0.560126	-1.47196	4.027	23.1511	-2.43293	-13.4132	-8.82613	-18.6525	7.43926			-29.7506	2.43274	13.4504	1.08524	-4.77645	-5.98564	6.02287	13.4595	-0.296296	-28.5422	8.89217	4.79469	-33.4805
1.448	-1.27408	-22.4114	-34.1746	-15.0562	-0.661304	-1.47248	3.93275	23.3189	-2.47646	-13.4308	-8.9027	-18.595	7.7716			-29.6877	2.62732	13.1172	1.08128	-4.74711	-6.01784	6.09421	13.359	-0.20489	-28.6533	8.81716	4.7066	-33.4284
1.45	-1.14946	-22.4575	-34.2029	-15.0237	-0.746858	-1.45701	3.90135	23.3794	-2.51559	-13.4355	-8.91447	-18.4858	8.00073			-29.6435	2.81341	13.0451	0.992404	-4.737	-6.02217	6.14631	13.306	-0.16429	-28.6936	8.67208	4.69592	-33.4966
1.452	-1.06529	-22.5447	-34.2025	-14.9718	-0.818496	-1.45211	3.88259	23.344	-2.56437	-13.4565	-8.88979	-18.3786	8.10345			-29.5779	2.95637	13.1093	0.956578	-4.74991	-5.99777	6.15675	13.307	-0.20636	-28.6776	8.53917	4.77697	-33.4593
1.454	-1.00558	-22.6868	-34.1409	-14.9083	-0.822892	-1.45176	3.91978	23.208	-2.62777	-13.4499	-8.85753	-18.2071	8.05692			-29.5363	2.95043	13.3054	0.912464	-4.74118	-5.96729	6.14411	13.4375	-0.228228	-28.6038	8.42689	4.87131	-33.4201
1.456	-1.01816	-22.6664	-34.1238	-14.8373	-0.748832	-1.43867	3.95094	23.06	-2.6201	-13.454	-8.80732	-18.0619	7.85799			-29.5254	2.82657	13.6508	0.86128	-4.7546	-5.90617	6.11205	13.5673	-0.225512	-28.4484	8.27145	5.02874	-33.4233
1.458	-0.951762	-22.6801	-34.0077	-14.7264	-0.637924	-1.38859	4.01899	22.9112	-2.57685	-13.4241	-8.78976	-17.9063	7.68573			-29.4707	2.58077	13.9414	0.78484	-4.77618	-5.84846	6.07828	13.6936	-0.282702	-28.3163	8.19234	5.13398	-33.4775
1.46	-0.845236	-22.6173	-33.8707	-14.6669	-0.506744	-1.34446	4.08691	22.7874	-2.53464	-13.3983	-8.78191	-17.7428	7.54774			-29.534	2.31805	14.1541	0.66934	-4.71943	-5.79841	6.05237	13.9273	-0.297164	-28.2631	8.12119	5.28879	-33.498
1.462	-0.71596	-22.5438	-33.7238	-14.6318	-0.4494	-1.29665	4.15643	22.5756	-2.39982	-13.3554	-8.7485	-17.5885	7.42855			-29.5377	2.09063	14.1864	0.487158	-4.73547	-5.75917	6.03151	14.1327	-0.349384	-28.2599	8.03782	5.41649	-33.4856
1.464	-0.522312	-22.5075	-33.7577	-14.6478	-0.433258	-1.27939	4.20067	22.4048	-2.30055	-13.3556	-8.74674	-17.4367	7.34367			-29.5665	2.02993	14.1503	0.355628	-4.74249	-5.72905	5.9954	14.3072	-0.296996	-28.302	7.9781	5.5643	-33.4742
1.466	-0.347942	-22.5765	-33.9055	-14.6726	-0.471996	-1.28528	4.23451	22.2768	-2.23308	-13.4622	-8.71434	-17.2662	7.31566			-29.5406	2.08685	14.0125	0.19285	-4.71639	-5.71953	5.96389	14.5176	-0.151312	-28.3774	7.896	5.71649	-33.4619
1.468	-0.136346	-22.7464	-34.0959	-14.7067	-0.547624	-1.34053	4.28004	22.1449	-2.06808	-13.559	-8.67248	-17.1262	7.47006			-29.4904	2.14355	13.9538	0.12467	-4.67515	-5.72712	5.9431	14.7337	-0.048006	-28.4552	7.85568	5.84643	-33.4942
1.47	0.113918	-23.0174	-34.3468	-14.7765	-0.633136	-1.42099	4.2742	22.1073	-1.99273	-13.6327	-8.66391	-16.979	7.77892			-29.4456	2.18403	13.872	0.081466	-4.68261	-5.76009	5.964	14.8019	0.039396	-28.5185	7.87363	5.96571	-33.4488
1.472	0.44632	-23.3043	-34.55	-14.7952	-0.72408	-1.49323	4.20084	22.1464	-1.86729	-13.7193	-8.62772	-16.8503	8.0905			-29.397	2.36968	13.8051	0.102242	-4.66756	-5.78845	6.04873	14.8831	0.039186	-28.6368	7.88368	6.11719	-33.4535
1.474	0.743834	-23.5796	-34.6003	-14.7406	-0.768418	-1.53938	4.10459	22.1957	-1.7858	-13.7137	-8.62338	-16.7529	8.31872			-29.3429	2.57083	13.6903	0.22022	-4.69067	-5.80703	6.12149	14.906	0.029036	-28.7578	7.9079	6.24207	-33.511
1.476	0.957432	-23.651	-34.5387	-14.6424	-0.768992	-1.54323	4.01731	22.2439	-1.73232	-13.7393	-8.61512	-16.6097	8.42443			-29.3112	2.5899	13.6106	0.388122	-4.66327	-5.81146	6.18985	14.9344	0.029764	-28.9012	7.97252	6.3674	-33.5268
1.478	1.09102	-23.6166	-34.3418	-14.5616	-0.751114	-1.51614	3.97174	22.2294	-1.71255	-13.663	-8.59988	-16.4651	8.40784			-29.3209	2.59619	13.6263	0.512876	-4.64748	-5.7924	6.22878	14.7611	0.000252	-28.9023	8.02638	6.49099	-33.4822
1.48	1.14155	-23.5217	-34.0769	-14.4381	-0.673064	-1.50914	3.95854	22.2107	-1.77104	-13.6703	-8.64406	-16.361	8.26399			-29.38	2.48983	13.5764	0.556262	-4.64085	-5.70844	6.23781	14.5312	-0.069286	-28.8945	8.08958	6.58648	-33.4631
1.482	1.1401	-23.3469	-33.7565	-14.3523	-0.587636	-1.51446	3.98839	22.1622	-1.83914	-13.6748	-8.7222	-16.3028	8.04531			-29.3665	2.32767	13.4668	0.557424	-4.61751	-5.61485	6.22632	14.2117	-0.074844	-28.813	8.13233	6.7076	-33.5027
1.484	1.10163	-23.1909	-33.5292	-14.3473	-0.526806	-1.48775	4.0453	22.0618	-1.95618	-13.6972	-8.79774	-16.2342	7.84255			-29.3557	2.25235	13.3818	0.56763	-4.58478	-5.53774	6.2126	14.0564	-0.10479	-28.7185	8.16124	6.81796	-33.5665
1.486	1.00083	-23.0543	-33.4562	-14.4274	-0.458654	-1.42743	4.11708	21.9569	-2.02055	-13.7348	-8.81369	-16.2114	7.68454			-29.3707	2.29188	13.2303	0.567126	-4.55567	-5.45734	6.1959	14.05	-0.15218	-28.6369	8.11156	6.95085	-33.5751
1.488	0.8778	-22.9423	-33.5196	-14.507	-0.390278	-1.35912	4.20329	21.836	-2.09572	-13.7522	-8.83261	-16.2632	7.5418			-29.3482	2.38134	13.1701	0.55286	-4.56805	-5.40967	6.18103	14.0801	-0.245014	-28.5661	8.06449	7.05621	-33.5793
1.49	0.801206	-22.8105	-33.6487	-14.6285	-0.381878	-1.31961	4.26418	21.7623	-2.09188	-13.7368	-8.83357	-16.3159	7.42771			-29.2458	2.42004	13.3109	0.441406	-4.57458	-5.39407	6.15455	14.1497	-0.323442	-28.5455	7.97328	7.09187	-33.6027
1.492	0.806484	-22.8098	-33.7095	-14.7165	-0.381822	-1.3039	4.31462	21.7658	-2.10167	-13.7138	-8.8474	-16.3425	7.45461			-29.1176	2.4415	13.6673	0.287616	-4.59025	-5.40882	6.13747	14.2778	-0.361046	-28.5951	7.95725	7.08536	-33.663
1.494	0.815318	-22.9297	-33.7958	-14.7764	-0.421694	-1.30439	4.33689	21.8766	-2.06954	-13.726	-8.85734	-16.2217	7.72167			-29.0328	2.39581	13.9564	0.102746	-4.61224	-5.42612	6.11568	14.3527	-0.352296	-28.6428	7.833	6.96689	-33.6566
1.496	0.867216	-23.1258	-33.8359	-14.8212	-0.524286	-1.34775	4.34822	21.9956	-2.02201	-13.7533	-8.85273	-16.1058	8.00131			-28.9667	2.35386	14.1427	-0.056798	-4.60267	-5.47196	6.11213	14.4901	-0.344064	-28.7044	7.6958	6.72675	-33.6559
1.498	0.81886	-23.3042	-33.7642	-14.871	-0.592018	-1.10431	4.30531	22.0325	-1.94207	-13.8142	-8.82886	-15.9962	8.22567			-28.9614	2.30845	14.2525	-0.162134	-4.63649	-5.30312	6.151	14.5685	-0.260918	-28.7425	7.63129	6.45026	-33.7418
1.5	0.780892	-23.429	-33.6189	-14.8823	-0.590086	-1.15697	4.20904	22.077	-1.91414	-13.8932	-8.82496	-15.931	8.33615			-28.9681	2.07474	14.3621	-0.226296	-4.64036	-5.35368	6.22587	14.6826	-0.231994	-28.7856	7.60684	6.29798	-33.7484
1.502	0.834274	-23.4434	-33.4828	-14.8035	-0.56595	-1.09883	4.11891	22.0833	-1.85349	-13.9661	-8.78339	-15.8971	8.31295			-29.0062	1.83047	14.3467	-0.231882	-4.648	-5.38483	6.30105	14.7093	-0.198324	-28.8424	7.5363	6.25848	-33.6366
1.504	1.00853	-23.4328	-33.4654	-14.696	-0.522508	-1.08396	4.06664	22.1262	-1.82993	-14.0757	-8.74422	-15.8356	8.17673			-28.9983	1.62313	14.2488	-0.199304	-4.65342	-5.44415	6.366	14.6068	-0.165228	-28.9266	7.54394	6.2545	-33.5186
1.506	1.20051	-23.4199	-33.5136	-14.5487	-0.451528	-1.33076	4.0381	22.1555	-1.7768	-14.1476	-8.67682	-15.9046	8.03956			-29.0604	1.54734	14.0767	-0.117348	-4.61644	-5.63737	6.38285	14.4275	-0.133098	-29.0095	7.58985	6.32652	-33.4221
1.508	1.38828	-23.5272	-33.6214	-14.3915	-0.42	-1.30654	4.04919	22.1348	-1.7366	-14.2439	-8.66321	-16.1333	7.89264			-29.0992	1.62463	13.8897	-0.05894	-4.56046	-5.59329	6.38257	14.1837	-0.102746	-29.149	7.66917	6.42068	-33.4025
1.51	1.68063	-23.5768	-33.708	-14.2918	-0.38241	-1.001	4.07911	22.0491	-1.74633	-14.2567	-8.68248	-16.334	7.7593			-29.1227	1.71472	13.5897	-0.056546	-4.49438	-5.3436	6.35968	14.0885	-0.049686	-29.2795	7.68394	6.52015	-33.3628
1.512	2.01218	-23.762	-33.7388	-14.2411	-0.376628	-1.31454	4.13911	21.9287	-1.67947	-14.2715	-8.73579	-16.4323	7.66812			-29.1811	1.79843	13.2744	-0.018172	-4.4487	-5.48345	6.33569	14.0736	0.01113	-29.3203	7.78932	6.66903	-33.3557
1.514	2.28754	-23.9523	-33.786	-14.2423	-0.400666	-1.02179	4.21032	21.7817	-1.66636	-14.3025	-8.82204	-16.4173	7.56923			-29.2351	1.92332	12.978	-0.039774	-4.41055	-5.1736	6.31361	14.0953	0.074634	-29.3337	7.81939	6.70989	-33.337
1.516	2.6103	-24.1122	-33.7898	-14.2432	-0.450912	-1.34781	4.27052	21.6741	-1.61865	-14.2924	-8.86178	-16.4314	7.4793			-29.241	2.19246	12.8846	-0.044114	-4.33059	-5.28291	6.29696	14.0512	0.136598	-29.3206	7.77298	6.66371	-33.3833
1.518	2.87568	-24.2679	-33.84	-14.3484	-0.488544	-1.38541	4.33199	21.6965	-1.56044	-14.2676	-8.86774	-16.3886	7.55119			-29.2796	2.52696	12.8731	-0.020132	-4.2776	-5.18829	6.27942	14.0072	0.218778	-29.2804	7.71068	6.56002	-33.5031
1.52	3.02114	-24.4142	-33.848	-14.4907	-0.522046	-1.44673	4.36356	21.7506	-1.56682	-14.252	-8.92893	-16.2763	7.74571			-29.338	2.80063	13.0103	-0.042112	-4.26437	-5.07823	6.25891	13.9609	0.305662	-29.182	7.56137	6.45827	-33.597
1.522	3.11002	-24.4903	-33.8552	-14.6955	-0.548366	-1.50072	4.35631	21.7643	-1.60555	-14.231	-8.99441	-16.151	7.93458			-29.4599	2.9014	13.2339	-0.129486	-4.29993	-5.03462	6.25846	14.0175	0.396032	-29.076	7.47951	6.45982	-33.7462
1.524	3.03983	-24.5687	-33.882	-14.8569	-0.541716	-1.52592	4.33265	21.8705	-1.68846	-14.2388	-9.05092	-15.9433	8.05375			-29.5267	2.83556	13.4435	-0.163478	-4.30843	-5.03899	6.30679	14.1301	0.434952	-29.0341	7.47785	6.6025	-33.8566
1.526	2.96342	-24.4799	-33.8057	-14.9158	-0.4886	-1.51082	4.27944	21.9899	-1.75706	-14.2151	-9.09843	-15.7708	8.16417			-29.5873	2.75262	13.6508	-0.141134	-4.38501	-5.08522	6.36581	14.2846	0.407526	-29.0282	7.42281	6.76302	-33.9039
1.528	2.86735	-24.3574	-33.7355	-14.8609	-0.382802	-1.44677	4.19562	22.0351	-1.83208	-14.2274	-9.12745	-15.6139	8.15501			-29.592	2.62998	13.6558	-0.126868	-4.41857	-5.14458	6.4293	14.3311	0.426244	-29.0485	7.41236	6.9153	-33.8472
1.53	2.78275	-24.2177	-33.68	-14.8399	-0.342636	-1.35145	4.14382	22.0615	-1.88937	-14.241	-9.13528	-15.4261	8.0583			-29.5232	2.45561	13.5795	-0.08645	-4.44199	-5.19813	6.48724	14.3127	0.39032	-29.0498	7.47565	7.07735	-33.7578
1.532	2.66917	-24.0999	-33.6533	-14.7751	-0.337946	-1.28853	4.11177	22.0978	-1.86669	-14.2695	-9.12726	-15.2616	7.85637			-29.39	2.27615	13.4227	-0.138222	-4.44667	-5.23981	6.53747	14.292	0.282548	-29.0726	7.52209	7.20705	-33.7585
1.534	2.63344	-24.0156	-33.6762	-14.6737	-0.386778	-1.26155	4.09241	22.0502	-1.8752	-14.3473	-9.09632	-15.1395	7.68004			-29.2452	2.21693	13.2172	-0.147476	-4.41588	-5.28618	6.53685	14.2565	0.209188	-29.1031	7.59829	7.30433	-33.7046
1.536	2.61006	-23.8476	-33.7913	-14.5089	-0.427532	-1.01786	4.12394	21.9271	-1.85223	-14.4302	-9.12383	-14.9772	7.55987			-29.2059	2.31924	13.0768	-0.151816	-4.38122	-5.09593	6.49716	14.2662	0.130606	-29.1666	7.66734	7.43614	-33.6259
1.538	2.72296	-23.6348	-33.9684	-14.3259	-0.466354	-1.30659	4.21981	21.7231	-1.74461	-14.5895	-9.18001	-14.8167	7.42935			-29.2164	2.47107	12.9466	-0.17675	-4.32891	-5.32897	6.48362	14.3225	0.145222	-29.2522	7.76181	7.5599	-33.5458
1.54	2.90049	-23.5584	-34.1178	-14.2208	-0.533274	-1.32234	4.30028	21.5394	-1.65899	-14.6521	-9.25998	-14.6982	7.29145			-29.2297	2.50741	12.9587	-0.211092	-4.26642	-5.30121	6.47119	14.3717	0.187446	-29.2891	7.88379	7.68404	-33.5051
1.542	3.13449	-23.6026	-34.2245	-14.1584	-0.57498	-1.11612	4.35127	21.4043	-1.5343	-14.6774	-9.33976	-14.5535	7.21564			-29.2127	2.43242	12.9009	-0.250754	-4.18597	-5.03503	6.44154	14.4815	0.278768	-29.3455	7.98235	7.8328	-33.494
1.544	3.35712	-23.7254	-34.2312	-14.1407	-0.635334	-1.38002	4.38208	21.294	-1.44099	-14.644	-9.38883	-14.477	7.36348			-29.2443	2.34557	12.8861	-0.240506	-4.1202	-5.1987	6.42711	14.5727	0.371504	-29.4242	8.0033	7.97754	-33.5764
1.546	3.61627	-23.924	-34.1224	-14.1601	-0.7287	-1.39118	4.41643	21.1256	-1.35409	-14.6005	-9.47999	-14.4642	7.6049			-29.3055	2.31549	13.0261	-0.262318	-4.10661	-5.15038	6.39271	14.6409	0.462882	-29.5027	7.97126	8.13001	-33.7005
1.548	3.87906	-24.0587	-33.9214	-14.2127	-0.791	-1.41037	4.41227	20.9525	-1.27207	-14.5146	-9.55672	-14.4894	7.7566			-29.3454	2.2197	13.0922	-0.264376	-4.08435	-5.05191	6.39285	14.6997	0.55111	-29.5619	7.95749	8.23239	-33.8382
1.55	4.21312	-24.2083	-33.638	-14.3041	-0.85134	-1.42234	4.32688	20.7563	-1.20862	-14.436	-9.60938	-14.5082	7.86261			-29.3359	2.04894	13.1177	-0.289352	-4.10785	-4.96978	6.43741	14.8153	0.658378	-29.5689	7.90206	8.22756	-33.9431
1.552	4.4945	-24.3674	-33.378	-14.4439	-0.813778	-1.41943	4.2148	20.6466	-1.10687	-14.4671	-9.60891	-14.4446	7.90329			-29.3366	1.82413	13.1411	-0.299544	-4.13487	-4.90514	6.50012	14.8664	0.748678	-29.5902	7.8618	8.19039	-33.9733
1.554	4.78815	-24.4618	-33.195	-14.5564	-0.728434	-1.39227	4.11753	20.482	-1.15892	-14.487	-9.60338	-14.3279	7.92747			-29.3532	1.69231	13.1358	-0.258426	-4.14291	-4.87232	6.54888	14.9482	0.803502	-29.5549	7.83885	8.09773	-33.9029
1.556	4.95235	-24.5723	-33.1102	-14.6486	-0.63595	-1.34694	4.06888	20.3036	-1.17397	-14.5641	-9.52295	-14.1522	7.90535			-29.409	1.7807	13.0852	-0.203168	-4.19681	-4.83101	6.5989	15.0934	0.847028	-29.5078	7.82107	8.01644	-33.8253
1.558	4.99723	-24.6191	-33.173	-14.6493	-0.55734	-1.29149	4.03921	20.1105	-1.22774	-14.6345	-9.44709	-13.9266	7.78239			-29.4866	1.99723	13.0321	-0.177968	-4.18124	-4.79011	6.63183	15.2046	0.854854	-29.4131	7.82186	7.89856	-33.7946
1.56	4.93011	-24.617	-33.2947	-14.5738	-0.529284	-1.258	4.05304	19.895	-1.29382	-14.6803	-9.34415	-13.7645	7.64896			-29.5168	2.23572	13.1413	-0.242382	-4.18895	-4.76129	6.62081	15.3435	0.828422	-29.3408	7.83581	7.78316	-33.7379
1.562	4.80199	-24.622	-33.4192	-14.5238	-0.564424	-1.23085	4.09833	19.7649	-1.34758	-14.6946	-9.2695	-13.6864	7.53267			-29.463	2.41471	13.318	-0.284956	-4.19346	-4.6894	6.59932	15.4591	0.821212	-29.2974	7.8216	7.73093	-33.6496
1.564	4.67085	-24.6786	-33.4804	-14.5037	-0.59654	-1.27428	4.15957	19.7081	-1.25563	-14.724	-9.24893	-13.7045	7.41434			-29.4688	2.65447	13.4877	-0.342552	-4.16284	-4.72244	6.59014	15.6047	0.773598	-29.3108	7.86782	7.74904	-33.5521
1.566	4.57835	-24.7809	-33.5233	-14.4541	-0.648438	-1.40056	4.24855	19.7391	-1.10153	-14.7333	-9.23671	-13.7279	7.29127			-29.4409	2.92593	13.4955	-0.368466	-4.1334	-4.8249	6.58077	15.6432	0.738486	-29.3503	7.91235	7.82921	-33.4675
1.568	4.42474	-24.9293	-33.4968	-14.3849	-0.678622	-1.47962	4.31865	19.8312	-0.980826	-14.8152	-9.23427	-13.8294	7.16295			-29.3699	3.13502	13.5836	-0.393596	-4.07935	-4.86214	6.57191	15.6203	0.674898	-29.401	7.94594	7.92252	-33.4322
1.57	4.29586	-24.9543	-33.4171	-14.3314	-0.757596	-1.49751	4.38204	19.9479	-0.866124	-14.8718	-9.24315	-14.0258	7.4062			-29.2478	3.26318	13.66	-0.393372	-4.02867	-4.88037	6.55421	15.5358	0.600138	-29.437	7.95089	7.91858	-33.5762
1.572	4.27582	-24.8487	-33.3253	-14.2674	-0.830102	-1.46461	4.43744	20.0821	-0.762076	-14.924	-9.22022	-14.2418	7.59583			-29.1847	3.20593	13.7012	-0.451822	-4.00917	-4.87976	6.53275	15.3839	0.585522	-29.4667	7.88038	7.90503	-33.7216
1.574	4.31543	-24.6831	-33.2392	-14.2088	-0.881664	-1.4212	4.45913	20.1767	-0.696612	-14.9436	-9.25918	-14.406	7.70955			-29.2262	3.05956	13.5754	-0.488152	-3.97053	-4.86009	6.52371	15.2134	0.524818	-29.5401	7.83293	7.8549	-33.9187
1.576	4.48995	-24.6034	-33.1813	-14.1657	-0.946932	-1.37197	4.38791	20.1436	-0.644392	-14.9628	-9.32996	-14.5444	7.8029			-29.2587	2.88443	13.3971	-0.546266	-3.95424	-4.80479	6.56552	15.1205	0.541744	-29.6446	7.78011	7.83756	-34.0044
1.578	4.66847	-24.4248	-33.1047	-14.0976	-0.99645	-1.33417	4.26539	20.0235	-0.638512	-14.9602	-9.42864	-14.5416	7.86646			-29.3003	2.83438	13.1999	-0.547582	-3.93959	-4.7339	6.60708	15.0996	0.575246	-29.7311	7.70351	7.80329	-33.9923
1.58	4.86303	-24.2831	-33.1065	-14.0564	-0.994056	-1.27971	4.18958	19.8767	-0.741636	-14.9006	-9.46368	-14.4539	7.8632			-29.3481	2.90657	13.0856	-0.531916	-3.9965	-4.67281	6.67276	15.0513	0.63469	-29.8008	7.59074	7.7275	-33.9998
1.582	5.07151	-24.2747	-33.1529	-14.0199	-0.990388	-1.22791	4.11515	19.7191	-0.90146	-14.8502	-9.51061	-14.3291	7.77248			-29.3808	2.97844	13.0468	-0.52283	-4.02107	-4.60909	6.7184	15.0478	0.659708	-29.8678	7.50452	7.76924	-34.0089
1.584	5.29246	-24.4152	-33.2314	-14.0042	-0.92414	-1.21083	4.09452	19.5961	-1.02767	-14.8578	-9.47731	-14.1205	7.66865			-29.4056	3.01017	13.0825	-0.491848	-4.04741	-4.56414	6.73189	15.0673	0.712124	-29.8732	7.39084	7.87293	-33.9408
1.586	5.55013	-24.5255	-33.2976	-14.0236	-0.83986	-1.21533	4.0948	19.4852	-1.11037	-14.8761	-9.46595	-13.9637	7.57023			-29.4109	3.07531	13.1959	-0.482678	-4.04502	-4.5403	6.71783	15.1296	0.706342	-29.8472	7.34154	8.00993	-33.8646
1.588	5.74199	-24.6875	-33.3613	-14.0118	-0.8057	-1.22016	4.12334	19.401	-1.12594	-14.9261	-9.41546	-13.8484	7.43858			-29.4121	3.24218	13.3651	-0.488936	-4.08873	-4.54086	6.70176	15.1888	0.650454	-29.7658	7.31016	8.0676	-33.8188
1.59	5.934	-24.8846	-33.3692	-14.0917	-0.796726	-1.23126	4.18985	19.3927	-1.14463	-14.9921	-9.35388	-13.6595	7.34776			-29.4051	3.39989	13.5254	-0.505862	-4.12041	-4.55013	6.68577	15.3056	0.637084	-29.6838	7.31009	8.19617	-33.8225
1.592	6.14078	-25.076	-33.3749	-14.218	-0.820806	-1.24743	4.26668	19.4417	-1.10219	-15.0441	-9.32848	-13.4981	7.28864			-29.3629	3.34975	13.5855	-0.556598	-4.13806	-4.56726	6.69046	15.4617	0.592074	-29.6177	7.32512	8.3026	-33.7902
1.594	6.39267	-25.2134	-33.3643	-14.342	-0.852656	-1.25553	4.32754	19.5565	-1.05491	-15.0779	-9.29863	-13.3685	7.18276			-29.3626	3.10796	13.5681	-0.649768	-4.12423	-4.61129	6.67152	15.6844	0.59871	-29.5854	7.32004	8.40335	-33.7468
1.596	6.69273	-25.307	-33.3457	-14.4287	-0.8932	-1.23652	4.37851	19.6161	-0.965958	-15.0893	-9.30342	-13.2031	7.09971			-29.3358	2.92363	13.5333	-0.73395	-4.11118	-4.69388	6.64075	15.8303	0.627242	-29.569	7.41006	8.51722	-33.8735
1.598	7.00595	-25.4056	-33.3731	-14.4349	-0.95109	-1.24723	4.41645	19.7003	-0.88319	-15.1192	-9.34545	-13.0734	7.0967			-29.3155	2.91799	13.4172	-0.741468	-4.0987	-4.73404	6.62564	15.9443	0.671832	-29.6051	7.54379	8.60822	-34.0054
1.6	7.29995	-25.4082	-33.3697	-14.4064	-0.994644	-1.26109	4.43919	19.7227	-0.802074	-15.1332	-9.42789	-12.9682	7.16071			-29.3499	3.0204	13.3484	-0.727426	-4.06876	-4.74481	6.61165	15.9724	0.752486	-29.641	7.58052	8.6717	-34.1167
1.602	7.59671	-25.331	-33.3616	-14.3169	-1.03888	-1.25058	4.39883	19.7943	-0.74095	-15.149	-9.50741	-12.871	7.21333			-29.3192	3.14688	13.2275	-0.75054	-4.04613	-4.73479	6.61723	15.9483	0.818776	-29.6745	7.5143	8.74325	-34.1944
1.604	7.70763	-25.2732	-33.3798	-14.2408	-1.07737	-1.25761	4.31661	19.8218	-0.61103	-15.1736	-9.56612	-12.7092	7.21941			-29.3401	3.16194	13.0973	-0.772856	-3.99538	-4.7258	6.64822	15.8771	0.861784	-29.7644	7.40568	8.80925	-34.2134
1.606	7.6238	-25.2178	-33.4463	-14.2153	-1.08396	-1.26902	4.19658	19.7163	-0.554022	-15.193	-9.65405	-12.5754	7.21977			-29.38	3.23184	12.8748	-0.788088	-3.96358	-4.70764	6.70218	15.7933	0.959434	-29.8597	7.27147	8.90665	-34.1729
1.608	7.49752	-25.1114	-33.5605	-14.1542	-1.06429	-1.27127	4.11372	19.5402	-0.444444	-15.1995	-9.71628	-12.4786	7.24104			-29.3863	3.44462	12.6826	-0.819868	-3.90531	-4.667	6.74594	15.6942	1.0409	-29.9558	7.08469	9.05731	-34.0583
1.61	7.33494	-25.0723	-33.6758	-14.0566	-1.02444	-1.26297	4.07841	19.3057	-0.35987	-15.1871	-9.75275	-12.3872	7.20511			-29.4128	3.71413	12.4942	-0.841568	-3.87251	-4.60744	6.79122	15.6977	1.10291	-30.0561	6.92097	9.17823	-34.0353
1.612	7.20118	-25.125	-33.7223	-13.9802	-0.976808	-1.2308	4.07176	19.0603	-0.281344	-15.1606	-9.71424	-12.3869	7.14711			-29.3699	3.84374	12.3968	-0.849142	-3.8535	-4.54854	6.79662	15.6853	1.19645	-30.1083	6.84537	9.30601	-34.043
1.614	7.04859	-25.1638	-33.7804	-13.8563	-0.949634	-1.2301	4.07288	18.8164	-0.164794	-15.1714	-9.66235	-12.4675	7.09012			-29.2663	3.79187	12.4083	-0.861042	-3.8282	-4.50239	6.78824	15.6643	1.27413	-30.1089	6.82979	9.34888	-34.062
1.616	6.89073	-25.089	-33.7668	-13.7844	-0.974148	-1.23423	4.11383	18.5144	-0.092554	-15.2002	-9.5969	-12.5349	7.05837			-29.2414	3.69345	12.5381	-0.85463	-3.80736	-4.4499	6.75809	15.6949	1.3561	-30.0927	6.83812	9.35936	-34.0507
1.618	6.85201	-25.001	-33.6892	-13.735	-1.04587	-1.27877	4.17557	18.2506	0.003878	-15.2649	-9.5646	-12.4723	7.06786			-29.2426	3.57605	12.6183	-0.820358	-3.83242	-4.37809	6.74331	15.7344	1.43051	-30.0821	6.84358	9.36985	-34.0135
1.62	6.96766	-24.8931	-33.5535	-13.7052	-1.13299	-1.31628	4.23577	18.0589	0.055692	-15.3009	-9.55238	-12.2977	7.11103			-29.2445	3.51089	12.6294	-0.788312	-3.84558	-4.28548	6.73515	15.7121	1.54108	-30.0237	6.8693	9.27216	-33.9359
1.622	7.16002	-24.7478	-33.4096	-13.6745	-1.20421	-1.34655	4.29488	17.9809	0.07602	-15.3039	-9.54946	-12.1716	7.13524			-29.2223	3.5181	12.6767	-0.77077	-3.84455	-4.21362	6.72322	15.7166	1.62611	-29.9765	6.91195	9.0673	-33.8727
1.624	7.35889	-24.6842	-33.3183	-13.7104	-1.24181	-1.38242	4.36206	18.0177	-0.012544	-15.2934	-9.59238	-12.0804	7.1967			-29.186	3.51229	12.6972	-0.762818	-3.85125	-4.16779	6.71037	15.7505	1.62854	-29.9404	6.97613	8.89617	-33.873
1.626	7.58078	-24.5959	-33.2598	-13.8378	-1.3201	-1.39195	4.40185	18.1439	-0.09905	-15.2434	-9.6978	-11.9927	7.24025			-29.1507	3.57798	12.6333	-0.8155	-3.87692	-4.16171	6.70177	15.7544	1.62379	-29.9113	7.07139	8.82346	-33.9665
1.628	7.85247	-24.6166	-33.2478	-14.0125	-1.36823	-1.3237	4.41826	18.2572	-0.164136	-15.1782	-9.82261	-11.9302	7.30219			-29.1592	3.67305	12.5655	-0.882784	-3.9109	-4.18225	6.6954	15.7345	1.60038	-29.883	7.09579	8.83169	-34.0965
1.63	8.1044	-24.7041	-33.2308	-14.1393	-1.35036	-1.22696	4.36666	18.3501	-0.164808	-15.1676	-9.93426	-12.0006	7.41419			-29.1818	3.71917	12.5356	-0.923916	-3.89651	-4.21005	6.71894	15.7053	1.5864	-29.8638	7.04745	8.83907	-34.2103
1.632	8.38219	-24.7835	-33.2773	-14.2009	-1.26399	-1.14176	4.2839	18.4829	-0.1638	-15.1644	-10.0209	-12.1336	7.56076			-29.163	3.66218	12.4641	-0.922544	-3.86154	-4.24934	6.76809	15.6152	1.52846	-29.8496	6.88176	8.82637	-34.3186
1.634	8.70027	-24.8282	-33.3225	-14.1825	-1.15962	-1.07554	4.19187	18.615	-0.127862	-15.1679	-10.1116	-12.318	7.64911			-29.1531	3.52482	12.458	-0.892822	-3.80582	-4.25034	6.81016	15.4938	1.46913	-29.8209	6.6492	8.82988	-34.3686
1.636	8.92413	-24.8185	-33.3239	-14.1223	-1.07017	-1.02078	4.10921	18.5816	-0.025046	-15.188	-10.2448	-12.5574	7.72968			-29.1335	3.39296	12.4218	-0.89579	-3.76041	-4.24185	6.84874	15.4103	1.44162	-29.8203	6.41773	8.84491	-34.3547
1.638	9.09838	-24.7607	-33.3371	-14.0497	-1.03607	-1.04107	4.0671	18.4773	0.117964	-15.1969	-10.292	-12.8169	7.70683			-29.156	3.3374	12.4733	-0.920976	-3.76242	-4.23363	6.88708	15.354	1.46077	-29.8418	6.2582	8.85434	-34.3242
1.64	9.16496	-24.7312	-33.3625	-13.9671	-1.0381	-1.07878	4.06993	18.3572	0.336924	-15.1868	-10.2531	-12.9853	7.56605			-29.2047	3.39391	12.5238	-0.962668	-3.76587	-4.23067	6.8929	15.2989	1.47307	-29.8483	6.17074	8.82381	-34.2711
1.642	9.12309	-24.7699	-33.3575	-13.8799	-1.07684	-1.11882	4.09214	18.252	0.478618	-15.2312	-10.2238	-13.0454	7.50511			-29.2571	3.47974	12.5025	-0.963508	-3.78111	-4.20934	6.87344	15.2629	1.48436	-29.8824	6.14478	8.7352	-34.2268
1.644	9.07652	-24.8257	-33.3194	-13.7768	-1.14432	-1.16508	4.15304	18.1885	0.569688	-15.2194	-10.1723	-13.006	7.50813			-29.2972	3.52635	12.4205	-1.00778	-3.77349	-4.15779	6.85289	15.2699	1.46035	-29.898	6.11349	8.69499	-34.1382
1.646	8.93137	-24.841	-33.3622	-13.6588	-1.23063	-1.21783	4.2111	18.1187	0.634858	-15.2406	-10.1402	-12.8526	7.47613			-29.2611	3.54698	12.3574	-1.09154	-3.78099	-4.04558	6.85632	15.3288	1.40903	-29.9523	6.08957	8.68141	-34.052
1.648	8.73033	-24.8896	-33.3573	-13.5523	-1.28019	-1.27288	4.27297	18.1495	0.661122	-15.2504	-10.1251	-12.7426	7.45328			-29.1631	3.66146	12.2583	-1.19676	-3.7968	-3.95174	6.85028	15.5115	1.33379	-29.978	6.06889	8.73914	-33.9515
1.65	8.53083	-24.9991	-33.3589	-13.4769	-1.36829	-1.30833	4.33	18.2397	0.707644	-15.3231	-10.1619	-12.5713	7.24697			-29.0253	3.80671	12.1607	-1.28099	-3.7905	-3.87913	6.84821	15.7981	1.32881	-30.0617	6.1237	8.84912	-33.8471
1.652	8.38054	-25.1655	-33.3439	-13.4697	-1.44878	-1.26868	4.3832	18.205	0.660772	-15.3863	-10.2055	-12.3727	7.1268			-28.8947	3.9248	12.0949	-1.32861	-3.79543	-3.85245	6.8399	16.0431	1.40494	-30.1176	6.26466	8.94004	-33.857
1.654	8.28519	-25.3528	-33.3543	-13.4209	-1.4896	-1.1697	4.42729	18.2013	0.518588	-15.4885	-10.3412	-12.2272	7.03384			-28.8889	3.95034	12.1138	-1.47062	-3.80225	-3.90314	6.84254	16.1299	1.44355	-30.14	6.38471	9.0708	-33.9933
1.656	8.37199	-25.5193	-33.3809	-13.4374	-1.53727	-1.06809	4.45607	18.2187	0.368802	-15.649	-10.4686	-12.0214	6.91995			-28.927	3.94204	12.1394	-1.53807	-3.80093	-3.93302	6.84137	16.2082	1.51645	-30.194	6.34134	9.18992	-34.2036
1.658	8.49981	-25.6408	-33.3987	-13.4743	-1.56411	-0.976052	4.42282	18.1687	0.293846	-15.8282	-10.6023	-11.9116	6.85948			-28.9919	3.89777	12.2144	-1.56832	-3.79663	-3.9401	6.85955	16.2742	1.56232	-30.2609	6.24659	9.29268	-34.3681
1.66	8.61946	-25.664	-33.4173	-13.5091	-1.55523	-0.900396	4.33181	18.2012	0.225512	-15.9207	-10.787	-11.7475	6.71388			-29.0645	3.86795	12.2606	-1.5812	-3.83307	-3.91586	6.89779	16.2347	1.58168	-30.3191	6.107	9.37482	-34.5004
1.662	8.70806	-25.6102	-33.4267	-13.5235	-1.54381	-0.901656	4.23028	18.2081	0.215726	-15.9716	-10.9365	-11.6346	6.54923			-29.0763	3.85351	12.2664	-1.50942	-3.89914	-3.88654	6.94624	16.233	1.57423	-30.3915	5.9723	9.47538	-34.6232
1.664	8.83191	-25.5742	-33.4158	-13.5017	-1.51668	-0.977536	4.16279	18.3627	0.233898	-16.043	-10.9886	-11.4763	6.42123			-29.0511	3.7441	12.2493	-1.37089	-3.93116	-3.84916	6.99264	16.1484	1.5092	-30.5366	5.84037	9.51111	-34.7534
1.666	9.00677	-25.5031	-33.3987	-13.3962	-1.48102	-1.07402	4.12689	18.5188	0.27839	-16.1423	-10.9521	-11.3129	6.32183			-28.9854	3.65256	12.2584	-1.26714	-3.94467	-3.84821	7.01709	15.9935	1.47826	-30.6864	5.81634	9.62714	-34.8414
1.668	9.18526	-25.5059	-33.4005	-13.3378	-1.44584	-1.22021	4.11324	18.5295	0.377314	-16.151	-10.8822	-11.2275	6.14202			-28.9875	3.67448	12.2557	-1.20184	-3.97505	-3.84881	7.00616	15.8167	1.48564	-30.7538	5.8105	9.69909	-34.9174
1.67	9.38242	-25.52	-33.3947	-13.3082	-1.44603	-1.26956	4.14074	18.3603	0.470666	-16.1204	-10.7843	-11.0815	6.07624			-28.981	3.74132	12.2129	-1.16284	-4.01471	-3.81949	6.97907	15.6893	1.51403	-30.7965	5.8224	9.7581	-34.9039
1.672	9.62132	-25.5532	-33.3851	-13.2574	-1.43711	-1.23698	4.23199	18.1825	0.585774	-16.0676	-10.6827	-10.9999	6.0556			-28.9728	3.86075	12.1688	-1.10529	-4.02562	-3.7967	6.97939	15.5576	1.55317	-30.8469	5.89939	9.81072	-34.829
1.674	9.82727	-25.5325	-33.3765	-13.2281	-1.45141	-1.16593	4.30718	18.021	0.711802	-16.0219	-10.5313	-10.9363	6.0783			-28.8764	3.93224	12.109	-1.10975	-4.04459	-3.80488	6.99054	15.5296	1.58418	-30.8802	6.07149	9.83942	-34.7694
1.676	10.1262	-25.5167	-33.4049	-13.2978	-1.48179	-1.07155	4.39132	17.8784	0.799204	-15.9906	-10.4678	-10.8441	6.13332			-28.7944	3.91719	12.1288	-1.11899	-4.06069	-3.7857	6.99164	15.4492	1.64695	-30.9168	6.20844	9.88665	-34.749
1.678	10.4015	-25.4413	-33.384	-13.3268	-1.53468	-0.960218	4.44494	17.7782	0.900788	-15.9966	-10.4016	-10.7961	6.17389			-28.7088	3.83055	12.1488	-1.17202	-4.06083	-3.76207	6.98138	15.4091	1.65794	-30.9217	6.25085	9.90952	-34.7203
1.68	10.5656	-25.3015	-33.3979	-13.3576	-1.5679	-0.869652	4.48476	17.7173	0.9877	-16.006	-10.3633	-10.7085	6.21824			-28.6416	3.7767	12.1851	-1.2364	-4.06676	-3.74317	6.96347	15.4089	1.70769	-30.9346	6.2568	9.97661	-34.6979
1.682	10.5963	-25.2337	-33.4054	-13.3892	-1.58768	-0.799176	4.49149	17.692	1.08265	-15.9813	-10.3476	-10.61	6.20459			-28.5865	3.75799	12.2075	-1.29814	-4.03452	-3.72551	6.96408	15.4719	1.75473	-30.9189	6.23715	10.0352	-34.7266
1.684	10.6356	-25.1437	-33.4093	-13.4472	-1.59015	-0.775768	4.40623	17.7191	1.19505	-15.941	-10.3846	-10.5074	6.16575			-28.5192	3.74115	12.188	-1.40584	-3.97323	-3.69687	6.98173	15.5254	1.79556	-30.8901	6.18873	10.1112	-34.7719
1.686	10.7109	-25.1107	-33.412	-13.5265	-1.56708	-0.812462	4.26922	17.7567	1.26976	-15.9622	-10.4692	-10.4624	6.13361			-28.5056	3.70303	12.2223	-1.5644	-3.87866	-3.67038	7.00953	15.5876	1.84514	-30.8787	6.11577	10.1938	-34.8039
1.688	10.7695	-25.1502	-33.3681	-13.6378	-1.55242	-0.922614	4.17131	17.8689	1.39131	-15.9952	-10.5524	-10.4965	6.10914			-28.6017	3.69253	12.2407	-1.73492	-3.79523	-3.65614	7.04103	15.6706	1.90428	-30.8793	6.00708	10.3006	-34.8699
1.69	10.7422	-25.2141	-33.3761	-13.6658	-1.53423	-1.03659	4.10687	17.9549	1.47867	-16.02	-10.6437	-10.5676	6.06981			-28.8766	3.72669	12.3245	-1.90175	-3.73862	-3.67391	7.08449	15.6723	1.95208	-30.9005	5.91903	10.38	-34.9329
1.692	10.6841	-25.2318	-33.3566	-13.7016	-1.52058	-1.09185	4.08363	18.0926	1.58171	-16.032	-10.6891	-10.7004	6.02956			-29.1481	3.83144	12.3911	-2.00572	-3.68355	-3.68514	7.08882	15.6904	1.98358	-30.9113	5.84492	10.4048	-34.9811
1.694	10.6647	-25.2597	-33.3682	-13.7165	-1.52435	-1.08042	4.08176	18.2494	1.68755	-16.0188	-10.733	-10.8359	5.9934			-29.4544	3.93282	12.3884	-2.06223	-3.68662	-3.74727	7.08344	15.696	2.04182	-30.8978	5.69723	10.3894	-35.0448
1.696	10.6997	-25.2909	-33.3623	-13.6966	-1.57123	-1.02623	4.113	18.3497	1.81958	-16.0567	-10.7622	-10.9307	5.87213			-29.6105	3.94141	12.3891	-2.04646	-3.74695	-3.77766	7.07756	15.6841	2.13459	-30.9231	5.55706	10.3157	-35.0937
1.698	10.8161	-25.274	-33.4019	-13.6211	-1.61833	-0.969612	4.16373	18.4381	1.94032	-16.0829	-10.7221	-10.9819	5.7624			-29.6667	4.01241	12.3621	-1.96437	-3.83841	-3.74893	7.07405	15.6688	2.17343	-30.9652	5.48195	10.1916	-35.1454
1.7	10.8581	-25.3013	-33.3869	-13.4606	-1.68792	-0.8911	4.23287	18.4299	2.03503	-16.1286	-10.6771	-10.979	5.61023			-29.6738	4.08303	12.349	-1.96339	-3.93859	-3.68455	7.07244	15.7001	2.25708	-31.0235	5.38798	10.0384	-35.2081
1.702	10.8664	-25.3489	-33.382	-13.3	-1.72568	-0.83027	4.31199	18.375	2.05731	-16.1959	-10.5979	-10.8847	5.47681			-29.5808	4.25636	12.3177	-1.98541	-3.99321	-3.57741	7.08572	15.7169	2.36118	-31.0842	5.33473	9.9906	-35.201
1.704	10.894	-25.4592	-33.373	-13.1078	-1.75501	-0.7609	4.37524	18.1999	1.99583	-16.234	-10.5981	-10.7038	5.3718			-29.3711	4.41448	12.2762	-2.02812	-4.01901	-3.45754	7.07651	15.6123	2.38836	-31.109	5.35948	10.0082	-35.1841
1.706	10.9576	-25.5379	-33.3786	-12.9179	-1.76226	-0.690424	4.43713	17.9891	1.91786	-16.2957	-10.5683	-10.5466	5.21864			-29.1427	4.44459	12.2331	-2.01915	-3.99039	-3.36963	7.06934	15.4554	2.40951	-31.1545	5.43663	10.0436	-35.2029
1.708	10.9826	-25.6439	-33.3479	-12.7837	-1.76091	-0.604086	4.47797	17.7942	1.83026	-16.3979	-10.6562	-10.436	5.07051			-28.9297	4.4582	12.1758	-2.01253	-3.95662	-3.32458	7.04425	15.4159	2.41713	-31.1713	5.51267	10.0815	-35.2495
1.71	10.965	-25.7806	-33.3105	-12.6917	-1.74392	-0.557158	4.47026	17.6003	1.80139	-16.5554	-10.7776	-10.3076	4.84497			-28.8164	4.47195	12.0749	-2.03151	-3.87449	-3.30547	7.0545	15.4199	2.37462	-31.1917	5.51011	10.1366	-35.3144
1.712	10.9811	-25.9202	-33.2957	-12.6315	-1.71801	-0.529872	4.37212	17.557	1.81997	-16.696	-10.9407	-10.1541	4.67684			-28.8212	4.57898	12.0324	-2.0453	-3.77964	-3.29301	7.08365	15.4843	2.32261	-31.202	5.46371	10.158	-35.3841
1.714	11.0587	-26.0253	-33.2634	-12.6181	-1.67937	-0.535052	4.28413	17.5323	1.85618	-16.8062	-11.074	-10.0471	4.59266			-28.9348	4.71101	12.0314	-2.02282	-3.66611	-3.30259	7.13952	15.5287	2.20165	-31.1898	5.44012	10.2214	-35.4376
1.716	11.1922	-26.1645	-33.2267	-12.6622	-1.61959	-0.584598	4.21819	17.4445	1.93224	-16.7744	-11.1859	-9.91557	4.55879			-29.0754	4.85388	12.0725	-1.96771	-3.60401	-3.32119	7.17849	15.5518	2.07101	-31.1509	5.35114	10.256	-35.4865
1.718	11.3547	-26.3153	-33.2364	-12.7322	-1.59895	-0.678426	4.17873	17.4662	2.01555	-16.7209	-11.3031	-9.78725	4.6061			-29.172	4.88076	12.0598	-1.96802	-3.59369	-3.34499	7.19568	15.5718	2.00404	-31.1466	5.2885	10.2932	-35.5983
1.72	11.4906	-26.5064	-33.2427	-12.7874	-1.62441	-0.762006	4.18545	17.5285	2.09587	-16.6977	-11.4444	-9.6437	4.72765			-29.2316	4.94339	11.9978	-1.98065	-3.65126	-3.39777	7.18981	15.5924	1.93892	-31.208	5.24615	10.3746	-35.7253
1.722	11.5726	-26.6735	-33.2203	-12.8696	-1.68305	-0.781298	4.21296	17.8114	2.13731	-16.6678	-11.5517	-9.51236	4.82773			-29.3775	5.1133	11.8645	-1.95348	-3.74087	-3.46181	7.19004	15.5474	1.90798	-31.263	5.18539	10.4483	-35.8831
1.724	11.662	-26.7684	-33.1775	-12.99	-1.78836	-0.76307	4.26887	18.0021	2.17006	-16.635	-11.6916	-9.46758	4.86163			-29.4498	5.26604	11.7065	-1.86512	-3.80671	-3.49355	7.19904	15.3881	1.88009	-31.3017	5.11104	10.5481	-36.0036
1.726	11.7231	-26.7928	-33.1212	-13.0582	-1.86423	-0.739004	4.31385	18.0597	2.15832	-16.6115	-11.834	-9.4667	4.85542			-29.5477	5.33805	11.4906	-1.7753	-3.89355	-3.50644	7.19947	15.2362	1.86799	-31.33	5.07101	10.6167	-36.1014
1.728	11.7238	-26.8809	-33.0499	-13.0857	-1.90911	-0.731962	4.38914	17.9808	2.177	-16.5725	-11.9738	-9.55286	4.83323			-29.5733	5.35083	11.2252	-1.74628	-3.95983	-3.50197	7.19155	15.1196	1.9108	-31.332	4.94854	10.6653	-36.1537
1.73	11.6354	-26.9819	-32.9656	-13.1151	-1.939	-0.701554	4.44611	17.8711	2.16192	-16.5956	-12.0157	-9.61387	4.73109			-29.5156	5.42392	11.0207	-1.71555	-3.98887	-3.446	7.18964	15.0178	1.99973	-31.3424	4.88072	10.7083	-36.1476
1.732	11.529	-26.9916	-32.8847	-13.1109	-1.9438	-0.665392	4.49812	17.7291	2.1111	-16.6332	-12.0038	-9.62139	4.53765			-29.3302	5.62727	10.782	-1.7018	-4.02191	-3.3803	7.17977	14.9304	2.08215	-31.3545	4.8314	10.6431	-36.1759
1.734	11.3987	-26.9041	-32.748	-13.1238	-1.92518	-0.618814	4.54948	17.602	2.02355	-16.6521	-11.9784	-9.65482	4.34223			-29.1687	5.79866	10.4969	-1.70577	-3.9859	-3.3294	7.18729	14.8387	2.17293	-31.3457	4.80561	10.5408	-36.1917
1.736	11.3906	-26.7127	-32.7003	-13.0876	-1.89834	-0.559286	4.56028	17.521	1.94831	-16.6888	-11.9233	-9.60235	4.14366			-28.9747	5.85199	10.3127	-1.73527	-3.9151	-3.29694	7.17773	14.8076	2.26587	-31.3566	4.75635	10.4247	-36.2384
1.738	11.4393	-26.601	-32.6436	-13.0695	-1.84974	-0.499548	4.47353	17.424	1.93724	-16.7081	-11.8812	-9.43387	3.91621			-28.8884	5.87406	10.1853	-1.76583	-3.79781	-3.2891	7.21416	14.8302	2.30027	-31.3477	4.72129	10.3583	-36.2946
1.74	11.4869	-26.6374	-32.7137	-13.0799	-1.80796	-0.433076	4.37256	17.4257	1.8839	-16.7309	-11.8398	-9.15813	3.59598			-28.9339	5.87607	10.1647	-1.79763	-3.71497	-3.27404	7.26004	15.0136	2.26996	-31.3715	4.66686	10.4059	-36.3667
1.742	11.5298	-26.7992	-32.8338	-13.0463	-1.79915	-0.364294	4.29622	17.3525	1.90422	-16.7495	-11.7353	-8.89059	3.26861			-29.0613	5.88781	10.1901	-1.82802	-3.69963	-3.25472	7.31017	15.1001	2.21988	-31.37	4.71794	10.4248	-36.4267
1.744	11.7001	-27.0615	-33.0005	-12.9749	-1.80964	-0.303394	4.22279	17.2306	1.93382	-16.7748	-11.7186	-8.67108	3.06065			-29.1205	6.07869	10.1783	-1.87292	-3.72939	-3.2473	7.35676	15.1879	2.17622	-31.371	4.86045	10.447	-36.3843
1.746	12.0263	-27.4126	-33.0686	-12.9018	-1.83219	-0.260442	4.21186	17.1747	1.98591	-16.7846	-11.7322	-8.40701	2.9406			-29.1085	6.30671	10.1744	-1.943	-3.79205	-3.23747	7.36092	15.2488	2.16283	-31.3713	5.02323	10.4842	-36.2832
1.748	12.3284	-27.8029	-33.1132	-12.8054	-1.89802	-0.267316	4.22789	17.1449	2.10087	-16.7943	-11.8101	-8.12609	2.94661			-29.0782	6.50975	10.1565	-2.05855	-3.83404	-3.21476	7.35515	15.2712	2.14389	-31.3654	5.1456	10.4718	-36.2168
1.75	12.5747	-28.2233	-33.079	-12.7314	-1.96297	-0.307734	4.28515	17.1477	2.20587	-16.8225	-11.9108	-7.88313	2.89909			-29.0554	6.68931	10.0784	-2.21858	-3.85395	-3.19206	7.34572	15.2332	2.1446	-31.3538	5.21641	10.414	-36.153
1.752	12.8315	-28.5994	-32.929	-12.6939	-2.03062	-0.399224	4.37174	17.2593	2.30969	-16.8804	-12.0055	-7.85434	2.89666			-29.133	7.00055	9.9617	-2.3485	-3.91079	-3.15496	7.33991	15.2166	2.15862	-31.3468	5.25584	10.358	-36.1539
1.754	12.9848	-28.9408	-32.8067	-12.607	-2.12185	-0.479752	4.44172	17.3728	2.41367	-16.912	-12.0596	-7.99109	2.95092			-29.2025	7.3458	9.72706	-2.5186	-3.96838	-3.12929	7.34217	15.1146	2.19426	-31.3244	5.32507	10.3797	-36.2806
1.756	13.0815	-29.2208	-32.6366	-12.5143	-2.18376	-0.530866	4.47378	17.3294	2.49368	-16.9249	-12.073	-8.17547	3.01592			-29.2509	7.65243	9.29209	-2.66332	-3.99511	-3.14782	7.34591	14.9917	2.2149	-31.3192	5.45583	10.3685	-36.4522
1.758	13.0844	-29.3046	-32.5087	-12.4706	-2.19099	-0.545496	4.50038	17.1463	2.59655	-16.9691	-12.1125	-8.41497	3.01591			-29.2882	7.69343	8.86883	-2.80462	-4.03788	-3.19568	7.34217	14.7369	2.24144	-31.341	5.5329	10.3658	-36.6873
1.76	12.9934	-29.252	-32.3659	-12.4969	-2.20298	-0.536788	4.49194	17.0347	2.69077	-17.0492	-12.1035	-8.60097	2.99944			-29.3611	7.59858	8.54567	-2.85375	-4.08719	-3.20473	7.38759	14.5297	2.26374	-31.3789	5.51207	10.3781	-36.8391
1.762	12.9115	-29.118	-32.2619	-12.5273	-2.16693	-0.502838	4.43516	16.963	2.77427	-17.0796	-12.0496	-8.754	2.98543			-29.3383	7.52074	8.35801	-2.82873	-4.12916	-3.19819	7.42391	14.3552	2.29915	-31.3955	5.45408	10.3844	-36.9223
1.764	12.7445	-29.1011	-32.2363	-12.5956	-2.11606	-0.45234	4.34794	16.856	2.85543	-17.0448	-11.9194	-9.01578	2.91833			-29.2531	7.49323	8.32784	-2.73959	-4.13769	-3.16303	7.44842	14.1921	2.35985	-31.3824	5.3312	10.3078	-36.9396
1.766	12.6277	-29.1463	-32.2129	-12.5903	-2.06077	-0.38794	4.28123	16.7368	2.95394	-17.0057	-11.8255	-9.10465	2.74067			-29.1538	7.40103	8.19318	-2.53886	-4.13456	-3.10612	7.47383	14.0412	2.36607	-31.3559	5.19207	10.175	-36.9166
1.768	12.6095	-29.2721	-32.3625	-12.557	-2.03087	-0.294938	4.22002	16.6686	3.03834	-16.9816	-11.7865	-9.10511	2.47195			-29.1084	7.2781	7.9149	-2.40624	-4.04676	-3.02595	7.51426	13.9501	2.41402	-31.3365	5.06594	10.0535	-36.9254
1.77	12.6101	-29.4267	-32.4948	-12.4956	-2.02282	-0.211666	4.16795	16.6162	3.15301	-16.9766	-11.7916	-9.09229	2.05738			-29.1512	7.27119	7.73422	-2.34181	-4.02678	-2.9569	7.54153	13.9342	2.43842	-31.328	4.97077	10.0115	-36.9676
1.772	12.6252	-29.5224	-32.5719	-12.4109	-1.9943	-0.139412	4.19373	16.6292	3.24464	-16.983	-11.7332	-9.09135	1.77316			-29.2602	7.51255	7.55642	-2.28033	-4.0418	-2.90896	7.51274	13.9778	2.47633	-31.3235	4.99601	10.0128	-37.0408
1.774	12.6878	-29.5633	-32.6077	-12.4155	-1.9957	-0.107548	4.22398	16.5822	3.36252	-17.0049	-11.7225	-9.08501	1.37733			-29.401	7.84927	7.57628	-2.22043	-4.07253	-2.87134	7.46794	14.0855	2.51629	-31.3224	5.06163	10.0412	-37.0958
1.776	12.8685	-29.6185	-32.5031	-12.4695	-2.00249	-0.074466	4.25477	16.6202	3.40236	-17.0202	-11.786	-9.09212	1.25639			-29.4272	8.08984	7.65678	-2.21745	-4.10824	-2.83613	7.44629	14.1985	2.59581	-31.3028	5.14053	10.0916	-37.0314
1.778	13.1403	-29.6767	-32.3793	-12.5863	-2.01456	-0.062048	4.2952	16.6859	3.36498	-17.0561	-11.9083	-9.07945	1.19416			-29.4493	8.24743	7.77641	-2.20156	-4.11488	-2.83917	7.43967	14.2586	2.64603	-31.3071	5.17534	10.1362	-36.9635
1.78	13.4541	-29.9156	-32.2074	-12.6496	-2.07211	-0.090566	4.30093	16.8034	3.30012	-17.0735	-12.0691	-9.01187	1.22412			-29.4207	8.31083	7.8065	-2.23391	-4.12908	-2.86485	7.45921	14.3247	2.65503	-31.3237	5.21972	10.1698	-36.8668
1.782	13.6997	-30.2662	-32.2277	-12.6869	-2.13959	-0.112098	4.32428	16.8627	3.19892	-17.0896	-12.1758	-8.98447	1.30788			-29.3768	8.38838	7.63696	-2.27228	-4.14005	-2.90107	7.47578	14.2606	2.69594	-31.3485	5.19837	10.1872	-36.8185
1.784	13.9822	-30.5878	-32.1885	-12.6673	-2.18396	-0.147574	4.37268	16.8944	3.18693	-17.1135	-12.3453	-8.90096	1.45284			-29.2982	8.53766	7.25264	-2.36978	-4.15352	-2.92814	7.50561	14.1504	2.68911	-31.3967	5.22829	10.232	-36.9043
1.786	14.2466	-30.804	-32.1047	-12.5956	-2.25022	-0.213724	4.44343	16.8651	3.1709	-17.1022	-12.484	-8.81782	1.6353			-29.2141	8.65589	6.74296	-2.49946	-4.16059	-2.97482	7.5122	14.0663	2.66312	-31.4336	5.20121	10.2885	-37.0733
1.788	14.4222	-30.8868	-31.9725	-12.4943	-2.30615	-0.297612	4.51406	16.7381	3.22706	-17.0413	-12.6754	-8.72131	1.67727			-29.0858	8.63386	6.23823	-2.61953	-4.17593	-3.03618	7.54753	14.0683	2.57996	-31.4455	5.21786	10.3022	-37.2715
1.79	14.558	-30.8396	-31.8699	-12.4144	-2.33384	-0.34139	4.55969	16.6418	3.2565	-17.0318	-12.8762	-8.61976	1.60941			-29.0072	8.48817	5.85448	-2.78932	-4.19371	-3.05348	7.57114	14.2079	2.46141	-31.4528	5.22297	10.3261	-37.3758
1.792	14.5504	-30.6708	-31.8508	-12.3133	-2.38038	-0.344022	4.62204	16.4588	3.42142	-17.085	-13.0195	-8.47907	1.51189			-28.8894	8.33174	5.68707	-2.88355	-4.23254	-3.06249	7.60563	14.3548	2.36085	-31.4577	5.18358	10.3393	-37.3678
1.794	14.4079	-30.4123	-31.9732	-12.1564	-2.42126	-0.332976	4.64772	16.2627	3.55383	-17.1264	-13.1599	-8.30784	1.26318			-28.8941	8.45029	5.74389	-2.90231	-4.30368	-3.06054	7.63293	14.4022	2.2833	-31.4619	5.11865	10.3844	-37.3677
1.796	14.2206	-30.3486	-31.949	-12.0207	-2.424	-0.314706	4.64296	16.1478	3.59491	-17.2004	-13.2142	-8.18514	0.97244			-28.9403	8.62518	5.92173	-2.90818	-4.34678	-3.05624	7.6323	14.2661	2.29067	-31.47	5.07199	10.397	-37.4286
1.798	14.0762	-30.5844	-31.8555	-11.8759	-2.41198	-0.279888	4.63858	16.0306	3.61043	-17.2546	-13.2174	-8.07485	0.61131			-29.0447	8.75543	6.08569	-2.87382	-4.3273	-3.02253	7.61872	14.1231	2.25635	-31.475	4.99332	10.4399	-37.4961
1.8	13.9506	-30.9843	-31.7785	-11.776	-2.35885	-0.206682	4.61646	15.949	3.60871	-17.314	-13.2077	-7.9067	0.182308			-29.2014	8.91524	6.21173	-2.88621	-4.33384	-2.97857	7.6189	14.0711	2.17377	-31.4739	4.88824	10.4539	-37.5435
1.802	13.7778	-31.4253	-31.8457	-11.732	-2.2856	-0.12782	4.5995	15.8788	3.65774	-17.3756	-13.217	-7.7299	0.04984			-29.4313	9.16362	6.09806	-2.86955	-4.32655	-2.92582	7.61016	14.0623	2.20434	-31.4901	4.80407	10.4813	-37.4912
1.804	13.632	-31.9047	-31.8489	-11.714	-2.22723	-0.052024	4.57638	15.8125	3.61417	-17.439	-13.1848	-7.59258	-0.005152			-29.5426	9.52735	5.66098	-2.85482	-4.33066	-2.87337	7.59221	14.0885	2.29026	-31.4948	4.753	10.5164	-37.3798
1.806	13.5226	-32.3431	-31.8012	-11.6699	-2.15011	0.036624	4.56837	15.8304	3.58939	-17.4815	-13.096	-7.43523	-0.024696			-29.5732	9.91806	5.10971	-2.85316	-4.32432	-2.81478	7.5444	14.1537	2.32439	-31.498	4.80665	10.5173	-37.2977
1.808	13.5525	-32.6028	-31.7403	-11.7104	-2.13154	0.093716	4.55388	15.8697	3.48141	-17.526	-12.9992	-7.28508	0.02541			-29.5168	10.0362	4.58241	-2.82327	-4.32291	-2.75731	7.52669	14.167	2.37548	-31.4767	4.88657	10.5484	-37.3001
1.81	13.6266	-32.5773	-31.7201	-11.8334	-2.11858	0.136836	4.54171	15.9548	3.43001	-17.5585	-13.0201	-7.12347	0.149828			-29.4318	9.97373	4.1053	-2.86527	-4.32188	-2.71291	7.52619	14.2443	2.42512	-31.4133	4.96857	10.5894	-37.3806
1.812	13.7828	-32.3767	-31.7402	-12.0556	-2.1244	0.179886	4.5176	16.086	3.36259	-17.5462	-13.1547	-6.95622	0.219716			-29.316	9.80154	3.84381	-2.89475	-4.33009	-2.68489	7.53298	14.2506	2.48396	-31.338	5.00804	10.5937	-37.5745
1.814	13.9925	-32.2015	-31.7941	-12.2094	-2.15314	0.211666	4.49348	16.1919	3.31412	-17.4976	-13.3049	-6.74964	0.235256			-29.1798	9.70516	3.87891	-3.01539	-4.38425	-2.68037	7.54235	14.2287	2.49554	-31.2871	5.03993	10.6079	-37.7453
1.816	14.1896	-32.0516	-31.74	-12.3158	-2.15576	0.25795	4.47185	16.2733	3.26635	-17.4828	-13.4574	-6.57853	0.259364			-29.0952	9.59505	4.05735	-3.08815	-4.41143	-2.6676	7.55878	14.0929	2.46901	-31.2637	5.08207	10.6604	-37.7922
1.818	14.4045	-31.9692	-31.7068	-12.3713	-2.18803	0.29141	4.4574	16.2815	3.32361	-17.4535	-13.646	-6.42663	0.0371			-29.02	9.54229	4.23577	-3.10359	-4.40922	-2.64355	7.58416	14.0256	2.42392	-31.2502	5.14272	10.697	-37.7452
1.82	14.6132	-32.1155	-31.6537	-12.3847	-2.24248	0.283122	4.47385	16.2526	3.36974	-17.4168	-13.7793	-6.23784	-0.180488			-28.9991	9.59748	4.39106	-3.01325	-4.36691	-2.65063	7.61043	13.9949	2.38228	-31.2669	5.18683	10.7381	-37.7107
1.822	14.8515	-32.4215	-31.6682	-12.3689	-2.30916	0.260862	4.51409	16.2534	3.39249	-17.4289	-13.9046	-6.12051	-0.561316			-29.0088	9.83542	4.30501	-2.99992	-4.32131	-2.66958	7.64456	14.0372	2.40163	-31.2895	5.22413	10.8339	-37.7096
1.824	15.0545	-32.803	-31.7205	-12.2984	-2.35007	0.232498	4.56714	16.1567	3.51233	-17.4675	-14.0395	-6.04947	-0.853328			-29.0541	10.1498	3.93001	-2.99433	-4.2902	-2.70476	7.66112	14.1209	2.38623	-31.3191	5.24744	10.9448	-37.7748
1.826	15.1923	-33.2078	-31.7774	-12.19	-2.36099	0.232176	4.6275	15.9888	3.60959	-17.5165	-14.1677	-6.08334	-1.27554			-29.1211	10.6165	3.37945	-3.07607	-4.28128	-2.75093	7.68606	14.1971	2.39365	-31.3237	5.28937	11.0408	-37.8556
1.828	15.2111	-33.6047	-31.7885	-12.0931	-2.3653	0.219702	4.6737	15.8828	3.66608	-17.5533	-14.3357	-6.09592	-1.59592			-29.211	11.0258	2.77833	-3.10946	-4.27935	-2.81833	7.70193	14.0922	2.41132	-31.3427	5.32248	11.0984	-37.8716
1.83	15.1576	-33.8748	-31.8379	-11.9571	-2.38074	0.173852	4.72941	15.7338	3.75193	-17.6152	-14.4767	-6.1727	-1.71108			-29.26	11.2198	2.22614	-3.14167	-4.2923	-2.82811	7.7184	13.9779	2.4327	-31.3513	5.38888	11.1377	-37.8452
1.832	15.0327	-33.9806	-31.8473	-11.834	-2.40971	0.134554	4.7929	15.666	3.83823	-17.6845	-14.6424	-6.19812	-1.74094			-29.2181	11.3096	1.76362	-3.24276	-4.34462	-2.83112	7.74374	13.8989	2.4502	-31.3743	5.39661	11.1325	-37.8014
1.834	14.8151	-33.9465	-31.8563	-11.721	-2.44896	0.138082	4.84036	15.5793	3.931	-17.7767	-14.8134	-6.21893	-1.70408			-29.1026	11.3576	1.48067	-3.25714	-4.43244	-2.81908	7.77693	13.8758	2.46924	-31.4018	5.45509	11.0395	-37.7618
1.836	14.6594	-33.8945	-31.9443	-11.569	-2.46754	0.135968	4.91102	15.5314	4.013	-17.8937	-14.9718	-6.27164	-1.53824			-28.9619	11.3342	1.51971	-3.29353	-4.48725	-2.81746	7.80135	13.8258	2.50559	-31.4271	5.49441	10.7655	-37.7318
1.838	14.5748	-34.0037	-31.9366	-11.4491	-2.44819	0.142142	4.96513	15.4927	4.12483	-18.0202	-15.1206	-6.38329	-1.30201			-28.9022	11.2343	1.67836	-3.35055	-4.54633	-2.81119	7.83517	13.8196	2.51185	-31.4362	5.4854	10.5407	-37.8406
1.84	14.5993	-34.2063	-31.8933	-11.3354	-2.42949	0.149702	4.99647	15.4755	4.21477	-18.1432	-15.2137	-6.40874	-1.07311			-28.8367	11.0202	1.95033	-3.42055	-4.58672	-2.78818	7.86803	13.8395	2.49945	-31.4507	5.46377	10.3774	-37.9327
1.842	14.6175	-34.3708	-31.8696	-11.273	-2.45633	0.175686	5.01011	15.4301	4.29887	-18.2767	-15.2227	-6.40318	-1.12045			-28.9053	10.9324	2.18537	-3.4938	-4.60207	-2.75734	7.88855	13.8245	2.49413	-31.4686	5.40674	10.266	-37.9555
1.844	14.6626	-34.4305	-31.9074	-11.264	-2.4194	0.193886	4.99731	15.5522	4.39768	-18.416	-15.1981	-6.36548	-1.16082			-28.9709	10.9988	2.33576	-3.52614	-4.58459	-2.7263	7.89967	13.833	2.51264	-31.5048	5.3299	10.2464	-37.9905
1.846	14.6868	-34.2538	-32.0059	-11.3057	-2.41916	0.243684	4.98476	15.6878	4.5109	-18.5643	-15.1666	-6.38975	-1.36011			-29.0448	11.3161	2.36909	-3.48407	-4.57094	-2.6774	7.92687	13.8227	2.53253	-31.534	5.23419	10.35	-38.0339
1.848	14.7768	-34.149	-32.0921	-11.3232	-2.48042	0.297836	4.96328	15.8326	4.59726	-18.7337	-15.1363	-6.43037	-1.6052			-28.9997	11.6818	2.09727	-3.49702	-4.50402	-2.6326	7.93733	13.7261	2.54499	-31.5568	5.22253	10.5283	-38.0705
1.85	14.8693	-34.1316	-32.2224	-11.3454	-2.55934	0.345618	4.97703	15.8526	4.71029	-18.8503	-15.0287	-6.49964	-1.88101			-28.9335	11.8612	1.62317	-3.48631	-4.40131	-2.58787	7.92427	13.5894	2.51817	-31.5185	5.32724	10.7297	-38.1411
1.852	15.0292	-34.2507	-32.324	-11.3664	-2.58496	0.411712	5.00837	15.8452	4.83113	-18.9267	-14.8987	-6.54867	-2.1568			-28.8522	11.9369	1.08601	-3.40038	-4.29967	-2.53392	7.90938	13.4767	2.44357	-31.4665	5.46085	10.9425	-38.1989
1.854	15.279	-34.5648	-32.4315	-11.4207	-2.57909	0.489342	5.09103	15.8788	4.92612	-18.9302	-14.9144	-6.52054	-2.53765			-28.7982	11.9244	0.77672	-3.29104	-4.22191	-2.49931	7.88683	13.4056	2.3704	-31.4409	5.61952	11.0552	-38.2429
1.856	15.5368	-34.9699	-32.5017	-11.4646	-2.56656	0.55587	5.19428	15.9115	4.94686	-18.9262	-14.877	-6.48589	-2.73526			-28.7808	11.9592	0.64841	-3.21748	-4.15783	-2.45199	7.85564	13.3054	2.33036	-31.4239	5.7379	11.058	-38.3292
1.858	15.7992	-35.4143	-32.5166	-11.4686	-2.55279	0.631274	5.29115	15.8914	4.88876	-18.9171	-14.861	-6.57478	-3.04044			-28.7615	12.1055	0.707602	-3.18783	-4.18403	-2.41546	7.81928	13.2539	2.32841	-31.4375	5.86688	10.9697	-38.3757
1.86	16.0175	-35.6635	-32.4985	-11.4926	-2.53908	0.66206	5.34897	15.9296	4.9469	-18.9116	-14.8009	-6.57096	-3.43468			-28.7925	12.2793	0.876092	-3.18689	-4.239	-2.36387	7.7937	13.1417	2.31364	-31.4902	5.94808	10.8736	-38.4473
1.862	16.2269	-35.7456	-32.4192	-11.4653	-2.54061	0.67102	5.38699	15.9552	4.92037	-18.9543	-14.7762	-6.49813	-3.63894			-28.8451	12.2742	1.04517	-3.21404	-4.33562	-2.35642	7.7751	13.1594	2.3298	-31.5423	5.94286	10.821	-38.454
1.864	16.3103	-35.6732	-32.3145	-11.4643	-2.51836	0.648326	5.3783	15.8757	4.85241	-19.059	-14.7218	-6.41234	-3.88147			-28.9171	12.2059	1.30866	-3.23735	-4.45316	-2.34952	7.79094	13.3251	2.37551	-31.5675	5.87698	10.7833	-38.4225
1.866	16.2846	-35.4446	-32.2377	-11.4402	-2.48597	0.595504	5.29452	15.8091	4.74188	-19.1681	-14.7505	-6.28435	-3.84947			-28.9795	12.1323	1.5191	-3.26672	-4.56579	-2.37112	7.85317	13.5809	2.44905	-31.5952	5.77535	10.7586	-38.3479
1.868	16.2058	-35.073	-32.1817	-11.4122	-2.47195	0.557886	5.19508	15.6249	4.67996	-19.284	-14.7701	-6.14328	-3.78883			-29.0099	12.1973	1.66534	-3.28262	-4.62521	-2.42063	7.91099	13.8625	2.50956	-31.631	5.61751	10.7752	-38.3291
1.87	16.1244	-34.7944	-32.1759	-11.3895	-2.49217	0.54488	5.12859	15.4692	4.62731	-19.4236	-14.809	-5.98167	-3.57993			-28.9997	12.2973	1.65521	-3.33186	-4.63513	-2.47839	7.9679	13.9578	2.62759	-31.6563	5.50514	10.7885	-38.3127
1.872	16.0892	-34.867	-32.1616	-11.3793	-2.51663	0.504336	5.08795	15.4029	4.57152	-19.5402	-14.8925	-5.8066	-3.30809			-28.9246	12.3706	1.57741	-3.38989	-4.57397	-2.54633	8.01228	13.955	2.61058	-31.6823	5.39405	10.8027	-38.4243
1.874	16.0257	-35.1651	-32.2064	-11.3435	-2.54275	0.457492	5.08449	15.3964	4.52656	-19.6592	-14.9417	-5.66366	-3.07241			-28.8191	12.3474	1.46195	-3.42952	-4.49019	-2.56099	7.99739	13.9186	2.58097	-31.6904	5.31115	10.7979	-38.6048
1.876	15.9107	-35.5074	-32.2507	-11.2622	-2.52281	0.441098	5.12848	15.4706	4.54388	-19.7955	-14.8824	-5.53629	-3.06485			-28.7612	12.3102	1.28838	-3.5029	-4.38759	-2.551	7.98085	13.9441	2.53736	-31.7273	5.29728	10.8139	-38.6408
1.878	15.8345	-35.8566	-32.3695	-11.1846	-2.56494	0.433314	5.19729	15.5406	4.55801	-19.9117	-14.8638	-5.42616	-3.07301			-28.7998	12.4868	1.158	-3.59509	-4.35393	-2.53583	7.95547	13.9615	2.54663	-31.7426	5.34628	10.8441	-38.5476
1.88	15.8514	-36.207	-32.5439	-11.0799	-2.55886	0.438312	5.27565	15.5574	4.63873	-20.0292	-14.876	-5.31514	-3.10663			-28.8309	12.6943	1.00076	-3.69162	-4.37119	-2.52295	7.9413	13.7649	2.51481	-31.7632	5.45178	10.8411	-38.4363
1.882	15.9239	-36.469	-32.69	-11.0151	-2.52392	0.466774	5.38441	15.5113	4.68831	-20.158	-14.9469	-5.18011	-3.23669			-28.8482	12.8267	0.84182	-3.78897	-4.42445	-2.49039	7.92509	13.5502	2.51874	-31.7837	5.55187	10.8297	-38.331
1.884	16.0077	-36.5372	-32.8069	-10.9427	-2.52736	0.504168	5.44499	15.4979	4.73756	-20.2835	-15.0635	-5.06608	-3.53543			-28.8695	12.8075	0.764694	-3.9075	-4.45312	-2.46095	7.89587	13.3305	2.51052	-31.7952	5.6029	10.8232	-38.3171
1.886	16.1512	-36.4081	-32.8864	-10.8892	-2.56661	0.552384	5.43001	15.4997	4.8466	-20.4119	-15.1618	-4.95221	-3.86856			-28.9026	12.7744	0.682248	-3.98181	-4.51856	-2.40792	7.92519	13.084	2.49021	-31.8082	5.64022	10.8275	-38.3199
1.888	16.2376	-36.1513	-32.9253	-10.8461	-2.5628	0.623644	5.41015	15.4669	4.91319	-20.5496	-15.2523	-4.81628	-4.11855			-28.9738	12.7948	0.666022	-4.02944	-4.59106	-2.35861	7.95585	12.7965	2.50744	-31.8284	5.69306	10.8514	-38.3538
1.89	16.3452	-35.7167	-32.8933	-10.8243	-2.5836	0.700756	5.36787	15.4213	5.01229	-20.6971	-15.3556	-4.6615	-4.35205			-29.0038	12.8092	0.633654	-4.02338	-4.67256	-2.29646	8.01902	12.4467	2.48696	-31.8543	5.73913	10.8402	-38.4157
1.892	16.4455	-35.3849	-32.7392	-10.8609	-2.58356	0.77679	5.27898	15.3815	5.07475	-20.8289	-15.4981	-4.49575	-4.57997			-29.0491	12.8226	0.638036	-3.9927	-4.76283	-2.24591	8.06646	12.1471	2.43916	-31.8477	5.85332	10.8772	-38.5274
1.894	16.5954	-35.2876	-32.472	-10.8865	-2.58163	0.838152	5.20673	15.3658	5.18277	-20.884	-15.5968	-4.3911	-4.68979			-29.0633	12.8114	0.72597	-3.97405	-4.79213	-2.21845	8.11279	11.9072	2.44818	-31.7955	5.91311	10.9861	-38.711
1.896	16.7241	-35.3887	-32.2118	-10.9142	-2.56169	0.911778	5.194	15.3885	5.28766	-20.8718	-15.7202	-4.35967	-4.7046			-29.0502	12.785	0.842142	-3.98605	-4.81656	-2.2087	8.14181	11.8115	2.42444	-31.7319	5.9605	11.0795	-38.8013
1.898	16.8462	-35.6127	-32.1017	-10.9272	-2.53606	0.980924	5.1952	15.3492	5.3296	-20.8384	-15.805	-4.38777	-4.70177			-28.9919	12.719	0.897652	-3.97389	-4.79101	-2.22293	8.16183	11.7403	2.40835	-31.6984	6.00522	11.1558	-38.8596
1.9	16.9259	-35.8594	-32.1548	-10.96	-2.52493	1.02064	5.23295	15.2685	5.42571	-20.7946	-15.9191	-4.46004	-4.74356			-28.8918	12.7909	0.888034	-3.95807	-4.76727	-2.22879	8.16424	11.745	2.41444	-31.6908	6.07424	11.1568	-38.8099
1.902	16.9269	-36.1746	-32.2091	-11.0118	-2.51839	1.04443	5.27415	15.2657	5.50165	-20.7058	-16.0041	-4.43029	-4.89598			-28.7279	12.9034	0.808752	-3.92003	-4.69067	-2.23681	8.12512	11.8465	2.39947	-31.7594	6.12791	11.0927	-38.6233
1.904	16.8445	-36.4619	-32.3081	-11.0972	-2.52168	1.02407	5.33844	15.2439	5.56123	-20.6602	-16.0904	-4.38984	-4.9475			-28.5693	13.0216	0.657006	-3.84727	-4.61516	-2.24921	8.09973	11.9735	2.37714	-31.8648	6.17848	10.9759	-38.3034
1.906	16.7706	-36.5086	-32.4659	-11.1687	-2.51817	1.00544	5.41586	15.2287	5.6166	-20.6643	-16.1803	-4.3548	-5.04323			-28.3986	13.0683	0.490322	-3.80615	-4.61629	-2.25925	8.08886	12.0864	2.37917	-31.9622	6.24578	10.8265	-38.0378
1.908	16.7254	-36.3198	-32.6026	-11.2314	-2.51051	0.980448	5.46603	15.2245	5.70346	-20.6707	-16.2425	-4.22957	-5.13689			-28.3041	13.1706	0.282478	-3.74835	-4.62986	-2.27707	8.07363	12.1783	2.35389	-32.0387	6.29723	10.699	-37.8855
1.91	16.6888	-35.99	-32.706	-11.2406	-2.51747	0.930636	5.50927	15.2985	5.7546	-20.6797	-16.3329	-4.01069	-5.22504			-28.2828	13.2657	0.149156	-3.7409	-4.67197	-2.3109	8.05587	12.3113	2.37271	-32.1139	6.3321	10.6482	-37.8067
1.912	16.6854	-35.6438	-32.6541	-11.2188	-2.52581	0.867468	5.50802	15.3878	5.82872	-20.6407	-16.3833	-3.77506	-5.32588			-28.3352	13.3376	0.060802	-3.75631	-4.69126	-2.33926	8.05619	12.4609	2.3459	-32.0109	6.38887	10.6536	-37.8667
1.914	16.6951	-35.4808	-32.5611	-11.2002	-2.51964	0.819658	5.49297	15.5108	5.87759	-20.7592	-16.448	-3.56866	-5.2253			-28.4861	13.3079	0.11844	-3.73569	-4.73312	-2.35341	8.10188	12.6711	2.334	-31.9927	6.4185	10.6419	-38.1383
1.916	16.7374	-35.5607	-32.4556	-11.1898	-2.54386	0.783552	5.48075	15.6138	5.94107	-20.9349	-16.5115	-3.34275	-5.13481			-28.6562	13.3458	0.279006	-3.75834	-4.78369	-2.35533	8.15059	12.8169	2.34923	-32.0299	6.48124	10.5842	-38.367
1.918	16.8183	-35.8172	-32.3373	-11.1624	-2.59889	0.775194	5.41919	15.6165	6.04212	-21.1914	-16.5636	-3.13439	-5.13978			-28.8654	13.3503	0.438424	-3.77159	-4.87154	-2.34795	8.21492	12.888	2.32011	-32.1088	6.50637	10.5857	-38.5264
1.92	16.8697	-36.0669	-32.2812	-11.1146	-2.64589	0.779282	5.35619	15.5555	6.12668	-21.2188	-16.6063	-2.98458	-5.15988			-29.0201	13.3244	0.63581	-3.76985	-4.91198	-2.34146	8.25258	12.838	2.34441	-32.0427	6.55697	10.554	-38.5605
1.922	16.9589	-36.3153	-32.2084	-11.0695	-2.68937	0.789012	5.32973	15.5115	6.22821	-21.5833	-16.6441	-2.9003	-5.1974			-29.1528	13.3559	0.80199	-3.80772	-4.98698	-2.33689	8.27634	12.6774	2.28918	-32.1111	6.57443	10.5745	-38.4975
1.924	16.9495	-36.539	-32.1397	-10.9843	-2.74425	0.806834	5.33642	15.4905	6.2782	-21.6607	-16.7014	-2.97562	-5.2395			-29.1485	13.4152	0.885738	-3.86259	-5.02566	-2.33608	8.29142	12.5821	2.31707	-32.0333	6.62469	10.5781	-38.3786
1.926	16.9898	-36.5666	-32.093	-10.9455	-2.77773	0.843934	5.3684	15.4369	6.37055	-21.6706	-16.7633	-3.16978	-5.35797			-29.0168	13.4168	0.950418	-3.89815	-5.02977	-2.31364	8.28059	12.4819	2.32247	-31.9591	6.68633	10.5737	-38.2761
1.928	16.9474	-36.435	-32.0901	-10.8997	-2.7573	0.866488	5.42282	15.401	6.45981	-21.58	-16.8177	-3.39605	-5.50969			-28.8469	13.4088	0.91252	-3.94092	-5.08416	-2.29326	8.25944	12.3202	2.28032	-31.8832	6.71819	10.571	-38.2041
1.93	16.891	-36.1947	-32.1295	-10.8354	-2.76772	0.917322	5.5004	15.3599	6.57745	-21.6796	-16.8858	-3.61977	-5.71431			-28.6939	13.4553	0.84196	-3.97947	-5.16702	-2.26398	8.25104	12.1409	2.31791	-31.8944	6.76756	10.6299	-38.1578
1.932	16.8783	-35.96	-32.216	-10.7749	-2.74133	0.981036	5.58774	15.2848	6.60962	-21.6814	-16.922	-3.80255	-6.00498			-28.5794	13.5579	0.73115	-3.99311	-5.21284	-2.25389	8.23637	11.9101	2.38036	-31.9498	6.79043	10.6373	-38.0772
1.934	16.8432	-35.7347	-32.2346	-10.735	-2.67763	1.04348	5.62974	15.214	6.61142	-21.7277	-16.9902	-4.02781	-6.29737			-28.4964	13.5546	0.631008	-4.02881	-5.24563	-2.22097	8.22886	11.6728	2.41542	-32.0792	6.84457	10.5859	-37.9629
1.936	16.7473	-35.5172	-32.2559	-10.7016	-2.63026	1.13831	5.68523	15.14	6.52826	-21.777	-17.0596	-4.25537	-6.40307			-28.4617	13.4658	0.462588	-4.03578	-5.27685	-2.17988	8.21909	11.5277	2.47475	-32.1995	6.89455	10.5851	-37.8746
1.938	16.6604	-35.3878	-32.217	-10.6309	-2.61783	1.21374	5.70994	15.1068	6.46989	-21.5682	-17.1031	-4.38215	-6.58286			-28.5095	13.4053	0.187614	-4.02244	-5.21872	-2.1567	8.22535	11.3309	2.55877	-32.228	6.94303	10.5655	-37.7702
1.94	16.651	-35.3277	-32.1532	-10.5589	-2.64025	1.29405	5.66191	15.0037	6.42811	-21.5869	-17.1738	-4.42697	-6.65928			-28.5823	13.4072	0.046704	-4.03852	-5.16061	-2.10799	8.25359	11.1548	2.57639	-32.2747	7.0034	10.5279	-37.758
1.942	16.7819	-35.3922	-32.1712	-10.464	-2.70838	1.33561	5.60361	14.8875	6.41336	-21.4902	-17.2397	-4.35929	-6.61863			-28.6832	13.5607	-0.042308	-4.05119	-5.09177	-2.08918	8.29552	10.9837	2.53959	-32.2876	7.0876	10.5421	-37.8855
1.944	16.9326	-35.4708	-32.2525	-10.4425	-2.74949	1.34722	5.53059	14.7854	6.41957	-21.7216	-17.2925	-4.29471	-6.32754			-28.8105	13.674	-0.024416	-4.06249	-5.00399	-2.05941	8.34564	10.9898	2.44502	-32.4028	7.09678	10.5617	-38.1822
1.946	17.078	-35.5925	-32.3362	-10.406	-2.72502	1.36195	5.45027	14.69	6.54748	-21.6777	-17.3761	-4.1693	-6.14636			-28.9626	13.7728	0.131138	-4.19378	-4.98719	-2.03246	8.37502	10.9516	2.2749	-32.2829	7.06027	10.5684	-38.454
1.948	17.1944	-35.6799	-32.459	-10.4233	-2.70248	1.34967	5.42116	14.6071	6.57313	-21.9739	-17.4251	-4.05079	-6.12697			-29.1337	13.9589	0.260386	-4.31091	-5.0269	-2.04756	8.41317	10.9185	2.21054	-32.3335	6.97742	10.5676	-38.5428
1.95	17.2875	-35.793	-32.6853	-10.4507	-2.71033	1.29794	5.41181	14.5282	6.59557	-22.0176	-17.4516	-3.92053	-6.15975			-29.2681	14.1791	0.462728	-4.41692	-5.06411	-2.07686	8.42341	10.9287	2.13724	-32.266	6.89524	10.5678	-38.4609
1.952	17.3298	-35.89	-32.876	-10.5066	-2.67261	1.26638	5.43983	14.5009	6.51596	-21.9012	-17.4703	-3.78561	-6.16652			-29.3172	14.3485	0.59143	-4.5156	-5.0938	-2.13065	8.41609	10.9428	2.10601	-32.172	6.87743	10.5446	-38.3446
1.954	17.4131	-35.9986	-33.0386	-10.5424	-2.66482	1.23932	5.48876	14.5574	6.50255	-22.1655	-17.4073	-3.67577	-6.17876			-29.279	14.3889	0.618786	-4.55133	-5.12127	-2.22044	8.41438	11.049	2.05919	-32.1829	6.81703	10.5472	-38.2235
1.956	17.4387	-36.0684	-33.0375	-10.5738	-2.66581	1.22783	5.56298	14.6749	6.51829	-21.9011	-17.2351	-3.54827	-6.27655			-29.1347	14.2188	0.529494	-4.53481	-5.19016	-2.27783	8.42645	11.2074	1.97872	-32.2043	6.82262	10.5256	-38.0938
1.958	17.4539	-36.1345	-32.9288	-10.5113	-2.6186	1.1872	5.65173	14.8308	6.51967	-22.1842	-17.1173	-3.43013	-6.57805			-28.9554	13.935	0.495054	-4.47518	-5.25938	-2.28882	8.42653	11.3981	1.97149	-32.3364	6.85791	10.5319	-37.9773
1.96	17.4701	-36.1922	-32.6351	-10.4213	-2.62959	1.14958	5.74113	14.9882	6.56123	-22.1005	-17.0444	-3.30464	-6.91303			-28.8381	13.6604	0.59654	-4.4171	-5.3642	-2.2749	8.43562	11.4661	2.0397	-32.4164	6.96256	10.4946	-37.9419
1.962	17.451	-36.3746	-32.2901	-10.2756	-2.57839	1.14786	5.81211	15.1009	6.59677	-22.4726	-17.006	-3.14537	-7.2437			-28.7396	13.4185	0.773836	-4.3534	-5.41779	-2.25116	8.44199	11.4877	2.08565	-32.5973	7.06033	10.5262	-37.9201
1.964	17.413	-36.5708	-32.0734	-10.1099	-2.56235	1.16409	5.8653	15.1765	6.512	-22.3285	-16.8656	-3.0094	-7.5237			-28.7307	13.2828	0.938378	-4.33825	-5.44818	-2.22846	8.41596	11.4093	2.25695	-32.6079	7.1205	10.5053	-37.8883
1.966	17.3539	-36.7414	-32.0348	-9.98962	-2.54661	1.16362	5.90689	15.1671	6.52873	-22.6062	-16.7642	-2.87767	-7.77188			-28.7199	13.2443	0.997388	-4.29071	-5.46377	-2.21339	8.41702	11.3269	2.36424	-32.7468	7.1328	10.4942	-37.8394
1.968	17.2859	-36.819	-32.0331	-9.82471	-2.54722	1.17242	5.86823	15.0723	6.47388	-22.715	-16.6777	-2.70011	-7.76262			-28.7717	13.363	0.974078	-4.2412	-5.46029	-2.20058	8.43462	11.3017	2.39894	-32.8398	7.1203	10.4608	-37.875
1.97	17.3183	-36.7445	-32.1303	-9.72049	-2.56194	1.19847	5.75452	14.9567	6.45945	-22.6975	-16.6794	-2.57095	-7.67602			-28.8355	13.6254	0.831376	-4.15661	-5.42126	-2.16059	8.47022	11.2686	2.34343	-32.8775	7.13499	10.4563	-37.8918
1.972	17.3878	-36.5774	-32.1976	-9.66704	-2.58811	1.24886	5.62496	14.9021	6.44185	-22.9782	-16.7036	-2.43957	-7.54006			-28.9518	13.853	0.662256	-4.06804	-5.3774	-2.12246	8.49789	11.0911	2.34384	-33.0208	7.16359	10.4317	-37.9312
1.974	17.4777	-36.4276	-32.3755	-9.64982	-2.58923	1.32663	5.52828	14.8744	6.4717	-22.9244	-16.7913	-2.29706	-7.34478			-29.0705	14.0373	0.508312	-4.05451	-5.34006	-2.09639	8.51295	10.9492	2.30289	-32.9649	7.23408	10.3921	-37.8638
1.976	17.5616	-36.2953	-32.5423	-9.7375	-2.54764	1.41366	5.47732	14.8618	6.5275	-23.0541	-16.9154	-2.12208	-7.19898			-29.1789	14.1273	0.37408	-4.08199	-5.27635	-2.08887	8.54245	10.8236	2.26913	-32.9633	7.29393	10.3463	-37.708
1.978	17.6269	-36.237	-32.7269	-9.83979	-2.49817	1.51456	5.48031	14.8541	6.57831	-23.1558	-17.0793	-2.0034	-7.12683			-29.3029	14.1462	0.313278	-4.14378	-5.30181	-2.04989	8.53615	10.6624	2.23763	-32.9573	7.35305	10.3523	-37.5444
1.98	17.7091	-36.3977	-32.7932	-9.95534	-2.5048	1.58627	5.52149	14.8447	6.64735	-22.9386	-17.2037	-1.87587	-7.13164			-29.3995	14.1604	0.21952	-4.21974	-5.29718	-2.01117	8.54147	10.4806	2.19631	-32.8494	7.35193	10.3389	-37.4567
1.982	17.7894	-36.5576	-32.75	-10.0544	-2.4711	1.64212	5.58734	14.825	6.76819	-22.7703	-17.3301	-1.7327	-7.20394			-29.484	14.1382	0.167244	-4.3245	-5.31875	-1.99438	8.53709	10.276	2.14383	-32.8286	7.34128	10.3174	-37.4689
1.984	17.7872	-36.6652	-32.5927	-10.1186	-2.46161	1.70841	5.66171	14.7868	6.84477	-22.6401	-17.4261	-1.63246	-7.3394			-29.4461	13.9928	0.242718	-4.46086	-5.36648	-1.98684	8.54178	10.1093	2.11418	-32.8584	7.33369	10.3086	-37.5026
1.986	17.8975	-36.6957	-32.3805	-10.1524	-2.4577	1.77034	5.72137	14.7644	6.92128	-22.7206	-17.4847	-1.50783	-7.57035			-29.3461	13.771	0.371868	-4.48456	-5.40313	-2.00785	8.5594	9.91736	2.0869	-32.9876	7.28826	10.31	-37.4749
1.988	17.9381	-36.7645	-32.1736	-10.1576	-2.4834	1.82322	5.73875	14.774	7.00974	-22.7264	-17.4432	-1.39404	-7.83024			-29.1932	13.6823	0.534632	-4.4473	-5.4563	-2.00547	8.5763	9.73886	2.0305	-33.0276	7.20824	10.294	-37.4772
1.99	17.8818	-36.7805	-32.1017	-10.1524	-2.49516	1.85569	5.75499	14.7142	7.12118	-22.7759	-17.3776	-1.27158	-8.01487			-29.1013	13.7343	0.6384	-4.37569	-5.49689	-2.00005	8.59918	9.58044	2.00869	-33.0359	7.17265	10.2798	-37.5332
1.992	17.8551	-36.7612	-32.0648	-10.1288	-2.49822	1.85804	5.79495	14.6335	7.1826	-22.9213	-17.3155	-1.1702	-8.17968			-29.0009	13.8516	0.699468	-4.33131	-5.56499	-2.00788	8.65463	9.4801	1.96391	-33.0924	7.21246	10.251	-37.6354
1.994	17.8242	-36.6012	-32.1101	-10.0412	-2.44926	1.82318	5.79933	14.5951	7.28683	-23.0749	-17.2652	-1.04842	-8.3071			-28.9089	13.9202	0.66297	-4.27403	-5.61599	-1.99543	8.71224	9.50922	1.95178	-33.1946	7.25463	10.2821	-37.7814
1.996	17.7827	-36.4659	-32.1778	-9.91838	-2.40437	1.79465	5.81577	14.6038	7.41661	-23.206	-17.264	-0.92701	-8.39867			-28.8649	14.0312	0.598682	-4.2469	-5.62888	-2.00411	8.76606	9.59727	1.88166	-33.2662	7.33522	10.3061	-37.9304
1.998	17.7841	-36.3182	-32.2855	-9.75394	-2.35971	1.76721	5.80174	14.6223	7.49046	-23.3579	-17.263	-0.89369	-8.44136			-28.8762	14.0768	0.443856	-4.26049	-5.6349	-2.01039	8.78997	9.7116	1.89483	-33.3686	7.42413	10.4513	-37.9254
2	17.8428	-36.0765	-32.3719	-9.58916	-2.3038	1.76639	5.7969	14.6771	7.54599	-23.5186	-17.2625	-0.920612	-8.39821			-28.8855	14.0795	0.322126	-4.22527	-5.6286	-2.03421	8.80415	9.83234	1.8668	-33.4614	7.53467	10.5659	-37.7268
2.002	17.9312	-35.8918	-32.3949	-9.47517	-2.33727	1.76357	5.78809	14.7415	7.63073	-23.639	-17.2973	-0.995848	-8.20849			-28.8754	14.1365	0.081984	-4.1958	-5.63307	-2.06718	8.82707	9.9665	1.81266	-33.5468	7.64078	10.6714	-37.4649
2.004	18.0324	-35.7268	-32.4347	-9.38672	-2.36288	1.74653	5.78712	14.7872	7.69754	-23.7526	-17.3317	-1.02882	-8.07832			-28.8957	14.1125	-0.115346	-4.23261	-5.58774	-2.08068	8.81766	10.1141	1.79273	-33.6178	7.73804	10.7237	-37.2649
2.006	18.1255	-35.6664	-32.4356	-9.41354	-2.40184	1.72285	5.8204	14.9567	7.75047	-23.8206	-17.3625	-1.01692	-8.123			-28.9583	14.0794	-0.363314	-4.21649	-5.54098	-2.07533	8.79795	10.2364	1.76096	-33.6096	7.81976	10.6881	-37.0532
2.008	18.2334	-35.7046	-32.4434	-9.48476	-2.43751	1.70303	5.86648	15.1171	7.8329	-23.8252	-17.4003	-1.03004	-8.1706			-29.0625	14.0685	-0.556248	-4.26959	-5.48148	-2.05747	8.77163	10.278	1.73866	-33.5431	7.92788	10.5223	-36.9915
2.01	18.346	-35.8007	-32.429	-9.63614	-2.43768	1.70464	5.93302	15.1091	7.875	-23.8251	-17.4311	-1.04849	-8.30456			-29.1808	14.1472	-0.650188	-4.33423	-5.4549	-2.03738	8.75598	10.3202	1.74222	-33.4966	8.01655	10.2842	-37.0125
2.012	18.3886	-35.805	-32.4531	-9.75607	-2.41387	1.69698	5.99288	15.0513	7.95941	-23.8116	-17.4131	-1.06954	-8.35421			-29.2754	14.4197	-0.528878	-4.40898	-5.43763	-2.02063	8.75126	10.3073	1.72374	-33.4511	8.09799	10.1088	-37.1202
2.014	18.4153	-35.7548	-32.5542	-9.82153	-2.43505	1.71881	6.0254	14.9312	8.05479	-23.74	-17.4247	-1.10713	-8.34065			-29.3783	14.6822	-0.35427	-4.47058	-5.4355	-2.004	8.74793	10.2668	1.70029	-33.4864	8.16691	10.0026	-37.3739
2.016	18.4674	-35.7414	-32.6619	-9.89068	-2.43044	1.73778	6.00228	14.8951	8.16168	-23.6357	-17.4805	-1.13756	-8.36464			-29.4015	14.8212	-0.114786	-4.47097	-5.44862	-1.98761	8.7638	10.0869	1.64942	-33.5698	8.24523	9.93342	-37.6213
2.018	18.5368	-35.8222	-32.7499	-9.91241	-2.38816	1.76772	5.96026	14.8405	8.2308	-23.5822	-17.4995	-1.14351	-8.47816			-29.3882	14.9176	0.086926	-4.43017	-5.47095	-1.97438	8.80628	9.9007	1.59221	-33.6425	8.30178	9.96344	-37.7907
2.02	18.5266	-35.8416	-32.8141	-9.85579	-2.38308	1.83428	5.88482	14.8118	8.33818	-23.5579	-17.5176	-1.18332	-8.54455			-29.3188	14.9476	0.18081	-4.41875	-5.50676	-1.94162	8.85375	9.66724	1.64654	-33.7174	8.35318	10.1142	-37.9452
2.022	18.526	-35.7575	-32.8133	-9.82407	-2.38585	1.88311	5.80173	14.7902	8.34569	-23.5553	-17.5825	-1.26979	-8.56736			-29.1829	14.9244	0.260372	-4.36239	-5.55036	-1.93154	8.88853	9.40296	1.68997	-33.7654	8.42925	10.3568	-38.0065
2.024	18.5261	-35.778	-32.7624	-9.73504	-2.4011	1.97529	5.72986	14.7524	8.33105	-23.5961	-17.5775	-1.30668	-8.53987			-29.0927	14.9052	0.408422	-4.37259	-5.58467	-1.91811	8.9284	9.2112	1.72606	-33.7817	8.48508	10.557	-37.9655
2.026	18.4731	-35.9054	-32.7242	-9.66223	-2.38955	2.06762	5.70158	14.6941	8.33909	-23.7337	-17.6097	-1.19195	-8.55481			-29.02	14.845	0.438004	-4.40049	-5.65076	-1.89748	8.95371	8.96813	1.75756	-33.8374	8.55009	10.7016	-37.8275
2.028	18.4182	-35.9824	-32.7255	-9.58702	-2.38685	2.14194	5.73033	14.6748	8.31256	-23.8808	-17.6374	-1.09396	-8.51476			-29.0177	14.6348	0.442288	-4.42357	-5.66868	-1.89153	8.95636	8.82914	1.83922	-33.8689	8.60241	10.7502	-37.6057
2.03	18.394	-36.035	-32.7618	-9.49974	-2.40289	2.19579	5.78248	14.6296	8.23616	-23.9772	-17.6589	-1.10134	-8.44467			-29.0318	14.3968	0.430206	-4.46789	-5.73324	-1.88406	8.94396	8.69278	1.8916	-33.8385	8.62677	10.7331	-37.3608
2.032	18.409	-36.1278	-32.7033	-9.45095	-2.42813	2.24045	5.86709	14.5457	8.23553	-24.0444	-17.6981	-1.09918	-8.48435			-29.0554	14.1429	0.39753	-4.47251	-5.78739	-1.87958	8.95212	8.52452	1.79084	-33.7872	8.72878	10.6687	-37.0956
2.034	18.5259	-36.2344	-32.6443	-9.41191	-2.48969	2.25771	5.95917	14.4803	8.27226	-24.0924	-17.7128	-1.04283	-8.49124			-29.049	14.0509	0.296268	-4.44637	-5.77769	-1.87419	8.97582	8.41998	1.69131	-33.7627	8.77318	10.5716	-36.8602
2.036	18.6208	-36.2404	-32.5135	-9.36341	-2.52788	2.25518	6.0212	14.3639	8.36455	-24.0513	-17.7551	-0.912688	-8.46364			-29.061	14.0341	0.186564	-4.43097	-5.80527	-1.87996	8.98467	8.34078	1.56055	-33.7733	8.85996	10.4568	-36.7417
2.038	18.6864	-36.1863	-32.4135	-9.28991	-2.5584	2.20732	6.05158	14.3293	8.47207	-24.0309	-17.7973	-0.725592	-8.48161			-29.0831	14.0774	0.069454	-4.45201	-5.79727	-1.89896	8.97788	8.35505	1.45603	-33.8379	8.89626	10.3629	-36.8216
2.04	18.7959	-36.1042	-32.3671	-9.20507	-2.58006	2.19397	6.0312	14.3009	8.56149	-24.0621	-17.9041	-0.50008	-8.34215			-29.0548	14.149	-0.033124	-4.49879	-5.75961	-1.93285	8.99052	8.39475	1.30964	-33.9452	8.8913	10.2939	-37.1192
2.042	18.9027	-36.0583	-32.3308	-9.08786	-2.55881	2.16685	5.96536	14.3093	8.55658	-24.1485	-17.9532	-0.355348	-8.26032			-28.9697	14.2603	-0.12593	-4.60361	-5.77748	-1.93383	9.03447	8.47897	1.21517	-34.08	8.83611	10.2105	-37.3716
2.044	18.9896	-35.8955	-32.3331	-8.94914	-2.51972	2.12762	5.89098	14.3966	8.51794	-24.266	-18.026	-0.090832	-8.22942			-28.9267	14.4319	-0.118314	-4.70225	-5.78029	-1.95286	9.09527	8.55268	1.20833	-34.2212	8.7088	10.1925	-37.5594
2.046	19.1406	-35.7493	-32.3661	-8.83669	-2.43989	2.07122	5.8038	14.5474	8.45705	-24.3779	-18.0145	0.068992	-8.26853			-28.9235	14.5097	-0.046144	-4.77621	-5.77809	-1.97495	9.1295	8.71851	1.16102	-34.3496	8.61531	10.153	-37.7073
2.048	19.3057	-35.6934	-32.4709	-8.73863	-2.33407	1.99503	5.76675	14.8217	8.34007	-24.4609	-17.9354	0.240744	-8.32971			-28.8837	14.4926	0.014476	-4.8722	-5.76197	-1.96351	9.14822	8.85668	1.12353	-34.4506	8.55032	10.0968	-37.6596
2.05	19.4186	-35.666	-32.6088	-8.62236	-2.27205	1.96641	5.76024	14.9052	8.35107	-24.5509	-17.8526	0.385462	-8.40594			-28.8948	14.4369	0.00385	-4.95186	-5.77364	-1.94648	9.1614	8.91208	1.07335	-34.565	8.59732	10.0605	-37.5703
2.052	19.5802	-35.7055	-32.7143	-8.54589	-2.26289	1.94963	5.79065	14.898	8.34919	-24.6294	-17.8044	0.572166	-8.59055			-28.9735	14.3212	0.041748	-5.04868	-5.77248	-1.93077	9.13711	8.85737	1.08889	-34.6867	8.71878	10.0132	-37.4079
2.054	19.6831	-35.7587	-32.7919	-8.4308	-2.28294	1.95363	5.85742	14.8177	8.33836	-24.739	-17.7941	0.71757	-8.73736			-29.0182	14.243	0.048118	-5.19487	-5.80026	-1.90996	9.1453	8.81416	1.20218	-34.8052	8.86465	10.0103	-37.1664
2.056	19.7432	-35.8364	-32.8705	-8.39479	-2.35497	1.9727	5.93215	14.7954	8.34911	-24.8335	-17.7891	0.765268	-8.94832			-29.0414	14.1426	0.034552	-5.31962	-5.77104	-1.88906	9.15937	8.71651	1.35138	-34.8757	8.97984	9.94749	-36.9105
2.058	19.6991	-35.9658	-32.8885	-8.35017	-2.41067	2.01345	5.99668	14.6742	8.38923	-24.8489	-17.7865	0.875364	-8.99192			-29.1016	14.0779	0.035504	-5.47264	-5.81715	-1.86963	9.17825	8.52704	1.51479	-34.8576	9.08272	9.90332	-36.7277
2.06	19.6816	-36.1151	-32.8131	-8.3207	-2.42957	2.04268	6.04022	14.6761	8.43065	-24.8607	-17.785	1.13873	-9.00612			-29.1183	14.1	0.027776	-5.6237	-5.80251	-1.85794	9.18063	8.32401	1.60075	-34.7999	9.19372	9.80461	-36.6535
2.062	19.6661	-36.2049	-32.7132	-8.25636	-2.4715	2.10249	6.03257	14.6189	8.39804	-24.8378	-17.799	1.19596	-9.06762			-29.1489	14.1469	0.087416	-5.81297	-5.80763	-1.82991	9.20011	8.11608	1.5828	-34.7585	9.27076	9.71867	-36.7358
2.064	19.6349	-36.2745	-32.583	-8.20977	-2.48665	2.14963	5.97022	14.6267	8.36613	-24.7466	-17.785	1.35764	-9.02016			-29.1662	14.2926	0.141932	-5.98041	-5.82855	-1.81345	9.22718	7.9316	1.57675	-34.7341	9.36741	9.59011	-36.9557
2.066	19.6324	-36.3544	-32.4844	-8.12491	-2.48849	2.21893	5.8854	14.5851	8.33785	-24.5686	-17.7679	1.30525	-8.80841			-29.1817	14.3693	0.16485	-6.14505	-5.83929	-1.78954	9.25754	7.76712	1.52372	-34.7246	9.48821	9.47939	-37.2771
2.068	19.6143	-36.3377	-32.3939	-8.10716	-2.50351	2.27097	5.76493	14.5702	8.32999	-24.4618	-17.7803	1.20077	-8.6801			-29.1923	14.3986	0.117516	-6.26391	-5.85808	-1.78912	9.25707	7.58521	1.47731	-34.7503	9.59673	9.4787	-37.5339
2.07	19.6371	-36.2892	-32.3564	-8.04576	-2.49483	2.31657	5.70611	14.5035	8.43492	-24.4428	-17.7734	1.00467	-8.73057			-29.1772	14.3956	0.080626	-6.33801	-5.91497	-1.79813	9.28151	7.48028	1.38538	-34.7852	9.75132	9.50907	-37.5459
2.072	19.6752	-36.301	-32.353	-8.0191	-2.53557	2.37853	5.66236	14.4139	8.4776	-24.4733	-17.7828	0.834022	-8.65043			-29.18	14.4275	-0.013916	-6.37962	-5.98161	-1.81712	9.29267	7.33594	1.29317	-34.7962	9.90499	9.6139	-37.4617
2.074	19.7065	-36.4117	-32.3504	-7.96778	-2.4857	2.41434	5.67979	14.3669	8.53707	-24.5534	-17.7932	0.649824	-8.68811			-29.2142	14.4609	-0.141904	-6.35183	-6.0375	-1.8664	9.29201	7.26872	1.22177	-34.8106	10.0373	9.84371	-37.3559
2.076	19.7061	-36.4789	-32.3475	-7.9029	-2.45445	2.45829	5.72464	14.3695	8.61195	-24.6928	-17.8247	0.504378	-8.70275			-29.22	14.4777	-0.206976	-6.29895	-6.05765	-1.91244	9.29827	7.32281	1.17691	-34.9374	10.1076	10.0637	-37.2704
2.078	19.7153	-36.5775	-32.3813	-7.8346	-2.40491	2.4709	5.80825	14.3423	8.68629	-24.8151	-17.8628	0.409234	-8.86285			-29.1982	14.5204	-0.28756	-6.21142	-6.07375	-1.96645	9.32315	7.37419	1.11824	-35.1164	10.1497	10.2027	-37.1943
2.08	19.7285	-36.7607	-32.4556	-7.76423	-2.35973	2.49614	5.88935	14.3875	8.80963	-24.9562	-17.9215	0.304598	-8.88084			-29.1809	14.4598	-0.404628	-6.14585	-6.0817	-1.98867	9.37068	7.41647	1.018	-35.2996	10.1255	10.2077	-37.1382
2.082	19.7154	-36.9094	-32.5954	-7.69511	-2.32354	2.49529	5.96219	14.4591	8.86654	-25.0857	-18.003	0.35336	-9.00976			-29.1898	14.245	-0.532084	-6.0576	-6.07662	-1.98388	9.38176	7.48357	1.03555	-35.424	10.0696	10.1835	-37.0098
2.084	19.7059	-37.0019	-32.6463	-7.66805	-2.2962	2.47876	6.01741	14.6071	8.95713	-25.1803	-18.0685	0.24542	-9.09376			-29.1872	13.9947	-0.616728	-5.98485	-6.08495	-1.93229	9.39085	7.58773	0.995288	-35.4785	10.035	10.1092	-36.9282
2.086	19.7068	-37.0635	-32.6812	-7.62247	-2.33412	2.46823	6.06833	14.7566	9.01795	-25.2344	-17.9937	0.355082	-9.14953			-29.1824	13.7502	-0.68047	-5.87857	-6.08881	-1.85304	9.4087	7.62357	0.909216	-35.474	9.97049	10.0174	-36.8847
2.088	19.7049	-37.1044	-32.6986	-7.60238	-2.43309	2.46215	6.06823	14.9047	9.07141	-25.2457	-17.8147	0.405482	-9.38941			-29.1998	13.5721	-0.702072	-5.83052	-6.0516	-1.77849	9.42964	7.65541	0.877268	-35.4447	9.95464	9.96185	-36.726
2.09	19.7286	-37.0827	-32.7058	-7.61242	-2.53193	2.45749	6.00669	14.9718	9.10116	-25.2079	-17.6861	0.672014	-9.42148			-29.1816	13.3465	-0.714224	-5.87345	-6.03236	-1.71966	9.47891	7.6663	0.832944	-35.4395	9.94511	9.92211	-36.7885
2.092	19.7299	-37.0209	-32.6996	-7.58253	-2.63922	2.44128	5.89555	14.8935	9.18068	-25.0816	-17.5675	0.873838	-9.55132			-29.222	13.1154	-0.624862	-5.98745	-6.00676	-1.73789	9.4919	7.68702	0.7749	-35.4695	9.94517	9.85715	-36.8039
2.094	19.7391	-36.9834	-32.7062	-7.59749	-2.72178	2.44623	5.79985	14.8387	9.21459	-24.9475	-17.4674	1.05707	-9.79962			-29.2299	12.9314	-0.569772	-6.15808	-5.97621	-1.76989	9.49971	7.66562	0.757092	-35.501	9.94582	9.81401	-36.7208
2.096	19.7507	-36.8949	-32.6697	-7.60729	-2.74184	2.46956	5.73405	14.729	9.28498	-24.878	-17.3548	1.13102	-10.0163			-29.2434	12.7893	-0.528542	-6.32712	-5.90187	-1.80996	9.52305	7.45836	0.687652	-35.5547	9.94098	9.76095	-36.591
2.098	19.8166	-36.913	-32.6642	-7.63592	-2.71153	2.50765	5.71323	14.5972	9.33937	-24.8705	-17.3226	1.30501	-10.2078			-29.2804	12.6251	-0.559328	-6.51886	-5.9474	-1.87522	9.53957	7.29508	0.603428	-35.5843	9.91011	9.75575	-36.5661
2.1	19.8907	-36.9869	-32.7065	-7.63659	-2.62739	2.56047	5.75456	14.5097	9.35932	-24.9031	-17.3192	1.53796	-10.4345			-29.2299	12.442	-0.698726	-6.64635	-5.95951	-1.96371	9.53844	7.20975	0.570458	-35.5868	9.84956	9.70494	-36.4807
2.102	20.0624	-37.0414	-32.7194	-7.63504	-2.54712	2.65059	5.8351	14.4563	9.45588	-24.9772	-17.3546	1.65911	-10.6899			-29.2101	12.2986	-0.796124	-6.81135	-6.01329	-2.03067	9.5529	7.15567	0.500584	-35.5774	9.83013	9.69277	-36.4449
2.104	20.1831	-37.0653	-32.7296	-7.62024	-2.45263	2.72293	5.93012	14.4052	9.53126	-25.0653	-17.4698	1.91593	-10.8049			-29.1667	12.3489	-0.970186	-6.90925	-6.07937	-2.09409	9.57278	7.12208	0.476364	-35.613	9.77777	9.6823	-36.5558
2.106	20.2719	-37.0623	-32.7307	-7.56578	-2.35649	2.76273	5.99644	14.3724	9.60145	-25.1734	-17.6469	1.93879	-10.8551			-29.136	12.4621	-1.08961	-6.97624	-6.11171	-2.13753	9.60509	7.0602	0.43547	-35.738	9.68688	9.66741	-36.6483
2.108	20.4045	-36.9543	-32.7278	-7.48777	-2.25567	2.79469	6.06075	14.338	9.66133	-25.3028	-17.8124	2.14278	-10.8596			-29.1139	12.6626	-1.18467	-6.99724	-6.10753	-2.13181	9.61654	7.06633	0.336182	-35.9089	9.62816	9.67448	-36.6835
2.11	20.5243	-36.88	-32.6741	-7.3971	-2.2524	2.78456	6.09151	14.403	9.75085	-25.4517	-17.9387	2.31067	-10.8689			-29.0984	12.7762	-1.33209	-6.9728	-6.12998	-2.10893	9.64198	7.10359	0.306908	-36.0562	9.65807	9.6221	-36.6594
2.112	20.7254	-36.8604	-32.6552	-7.29186	-2.29222	2.73906	6.06889	14.5409	9.83398	-25.5911	-17.9865	2.45409	-10.8349			-29.1057	12.8704	-1.4608	-6.89584	-6.10408	-2.03214	9.67562	7.20812	0.284466	-36.1366	9.65037	9.59858	-36.4966
2.114	20.8765	-36.792	-32.7148	-7.20947	-2.35628	2.68005	6.01203	14.7803	9.90378	-25.692	-17.9666	2.59764	-10.8128			-29.1039	12.9918	-1.68993	-6.80193	-6.10455	-1.95404	9.70892	7.26757	0.319606	-36.1568	9.61471	9.59349	-36.2107
2.116	20.973	-36.7387	-32.7912	-7.15009	-2.45056	2.6346	5.9145	15.0032	9.9038	-25.7454	-17.9029	2.76359	-10.8372			-29.1144	13.0625	-2.0098	-6.69306	-6.06561	-1.92513	9.71932	7.32829	0.35588	-36.161	9.64877	9.58045	-35.9067
2.118	21.0423	-36.6766	-32.8519	-7.06807	-2.52251	2.59004	5.83362	15.0845	9.87883	-25.6976	-17.827	2.92345	-10.8718			-29.0536	13.1724	-2.1978	-6.56999	-6.07377	-1.95541	9.73462	7.22214	0.455378	-36.1698	9.71845	9.58784	-35.6749
2.12	21.1213	-36.5933	-32.9279	-7.04752	-2.52969	2.56714	5.78458	15.1152	9.85993	-25.5443	-17.7532	2.9559	-10.924			-28.9714	13.2027	-2.30665	-6.51319	-6.10849	-1.98534	9.75435	7.16268	0.484652	-36.1728	9.8537	9.62664	-35.5253
2.122	21.2122	-36.5688	-33.0816	-7.05016	-2.49971	2.57081	5.77745	15.1546	9.82701	-25.3681	-17.7012	2.95166	-11.0208			-28.8615	13.1147	-2.33352	-6.4318	-6.12584	-2.03216	9.75667	7.10217	0.474264	-36.1553	9.97788	9.73599	-35.4699
2.124	21.2394	-36.4801	-33.1352	-7.07811	-2.4414	2.59326	5.82907	15.157	9.79014	-25.2782	-17.659	2.97742	-11.033			-28.7792	12.9821	-2.2552	-6.3803	-6.14368	-2.05353	9.77795	7.01656	0.386694	-36.1991	10.0802	9.77687	-35.6448
2.126	21.2701	-36.4031	-33.2223	-7.10009	-2.37857	2.65936	5.89124	15.1644	9.76595	-25.2623	-17.6009	2.95758	-11.0416			-28.7357	12.8707	-2.19836	-6.4248	-6.19629	-2.07572	9.80836	6.89482	0.233674	-36.2327	10.1855	9.82685	-35.9383
2.128	21.296	-36.3611	-33.279	-7.01844	-2.3164	2.74736	5.97268	15.1997	9.82842	-25.324	-17.5661	2.85697	-10.9956			-28.6578	12.7849	-2.13198	-6.62966	-6.24205	-2.09896	9.84137	6.8586	0.07707	-36.2292	10.2765	9.87792	-36.2015
2.13	21.3412	-36.4133	-33.3374	-7.0202	-2.27741	2.83259	6.04513	15.2615	9.87217	-25.408	-17.5443	2.85664	-11.0113			-28.6105	12.7134	-2.04127	-6.84522	-6.29619	-2.12282	9.86934	6.8032	-0.042168	-36.1928	10.3869	9.86192	-36.337
2.132	21.4028	-36.4472	-33.3469	-7.00585	-2.2064	2.90994	6.09654	15.2501	9.81588	-25.4936	-17.4966	2.86733	-10.9783			-28.5976	12.6549	-2.03547	-7.02474	-6.32429	-2.12661	9.87118	6.8109	-0.154728	-36.1889	10.5002	9.72478	-36.314
2.134	21.5097	-36.3379	-33.3552	-7.02577	-2.18999	3.01631	6.12217	15.1745	9.78324	-25.5838	-17.474	2.80318	-10.8682			-28.594	12.7436	-2.12316	-7.19697	-6.35765	-2.10988	9.88672	6.96682	-0.216426	-36.3215	10.6269	9.46824	-36.2184
2.136	21.5584	-36.254	-33.3586	-7.06097	-2.18533	3.12113	6.11762	15.0475	9.71057	-25.7114	-17.43	2.80918	-10.8212			-28.6643	12.8608	-2.31315	-7.33901	-6.35611	-2.07045	9.94213	7.14161	-0.236936	-36.5187	10.7579	9.23315	-36.0994
2.138	21.6858	-36.1754	-33.3276	-7.02351	-2.19547	3.19974	6.05905	14.8537	9.7034	-25.8474	-17.3642	2.74488	-10.8125			-28.7576	13.0015	-2.5478	-7.45508	-6.37105	-2.02535	9.99041	7.21248	-0.279776	-36.7236	10.8672	9.03276	-35.9469
2.14	21.8319	-36.067	-33.3365	-6.97129	-2.21043	3.24023	5.94857	14.7855	9.72698	-25.9594	-17.3458	2.65063	-10.9719			-28.8905	13.0692	-2.79486	-7.51533	-6.36413	-2.02485	10.0016	7.24028	-0.263368	-36.8649	10.9907	8.9192	-35.7529
2.142	21.9255	-35.9547	-33.3605	-6.87075	-2.24969	3.19971	5.8345	14.7637	9.69875	-26.0553	-17.3597	2.59253	-11.2266			-28.9816	13.1133	-3.09306	-7.58395	-6.30757	-2.09485	10.0076	7.22448	-0.17297	-36.9479	11.087	8.89298	-35.5786
2.144	21.9552	-35.8417	-33.3375	-6.79848	-2.31703	3.10324	5.77485	14.7548	9.71978	-26.1157	-17.4013	2.58314	-11.4958			-29.0578	13.1622	-3.41229	-7.57894	-6.27325	-2.20863	10.0196	7.22686	-0.038948	-36.9856	11.179	8.96662	-35.3853
2.146	22.022	-35.8646	-33.3338	-6.65736	-2.37867	3.07301	5.78144	14.859	9.77563	-26.161	-17.4919	2.61341	-11.7256			-29.1351	13.0607	-3.76177	-7.54149	-6.25566	-2.30737	10.0262	7.14778	0.081942	-36.956	11.2251	9.15445	-35.2388
2.148	22.0762	-35.8133	-33.351	-6.55815	-2.38083	3.11242	5.83698	14.9147	9.83206	-26.1701	-17.5284	2.69739	-11.9675			-29.1907	13.0985	-4.1417	-7.42584	-6.21337	-2.37622	10.0319	7.009	0.158368	-36.916	11.2739	9.30062	-35.1837
2.15	22.1478	-35.8281	-33.3576	-6.46885	-2.32557	3.15028	5.93284	14.9513	9.80064	-26.1377	-17.6324	2.83137	-12.1802			-29.164	13.0519	-4.55953	-7.33972	-6.2	-2.4319	10.0371	6.85754	0.206122	-36.8918	11.3296	9.42931	-35.2094
2.152	22.3101	-35.8575	-33.394	-6.38116	-2.26932	3.18262	6.02218	14.9457	9.79129	-25.9944	-17.645	2.94609	-12.2278			-29.103	12.9406	-4.93772	-7.23667	-6.2456	-2.47332	10.0476	6.70207	0.24948	-36.8786	11.3172	9.44254	-35.3475
2.154	22.6249	-35.9141	-33.3952	-6.33242	-2.21941	3.20503	6.09634	14.9618	9.72227	-25.8098	-17.5816	2.9239	-12.2696			-29.0574	12.8596	-5.20414	-7.14731	-6.27213	-2.44793	10.0539	6.5254	0.229348	-36.8695	11.2305	9.41958	-35.4028
2.156	22.9355	-35.9847	-33.3218	-6.32398	-2.15183	3.218	6.12172	14.9796	9.71891	-25.6587	-17.514	2.91652	-12.1437			-29.0336	12.8422	-5.35293	-7.07365	-6.30543	-2.36037	10.0709	6.34155	0.183456	-36.8705	11.1813	9.38836	-35.3208
2.158	23.2491	-36.0191	-33.2559	-6.28127	-2.10176	3.23287	6.11202	14.9464	9.75152	-25.5936	-17.3741	2.89365	-11.8864			-29.0372	12.9365	-5.38509	-7.06651	-6.34795	-2.2744	10.1129	6.21043	0.08659	-36.8957	11.1159	9.28101	-35.1802
2.16	23.4558	-36.0873	-33.2864	-6.23862	-2.05481	3.23753	6.05966	14.9288	9.7564	-25.5925	-17.2311	2.86397	-11.6676			-28.9775	13.0088	-5.34087	-7.1212	-6.39605	-2.20949	10.1671	6.07277	-0.008176	-36.8708	11.1178	9.14474	-35.0532
2.162	23.6097	-36.1221	-33.3451	-6.23921	-2.02352	3.23872	6.00785	14.9122	9.7876	-25.6483	-17.1654	3.0428	-11.5368			-28.9109	13.0088	-5.29403	-7.25567	-6.44371	-2.20105	10.2175	5.96828	-0.12978	-36.8595	11.1262	9.03496	-34.8284
2.164	23.7512	-36.1328	-33.4874	-6.2734	-2.02483	3.23175	5.93253	14.8501	9.85411	-25.708	-17.1676	3.0626	-11.519			-28.8724	12.9789	-5.11494	-7.36982	-6.50306	-2.23499	10.2663	5.84482	-0.24031	-36.858	11.129	9.02444	-34.6742
2.166	23.8328	-36.1493	-33.6434	-6.36874	-2.01256	3.23659	5.88907	14.8347	9.86222	-25.7882	-17.1697	3.33833	-11.5606			-28.8001	13.0613	-5.07314	-7.54877	-6.527	-2.28164	10.2946	5.67906	-0.32522	-36.964	11.1809	9.00087	-34.6438
2.168	23.9058	-36.2147	-33.7118	-6.47598	-2.02773	3.25181	5.86908	14.7942	9.94549	-25.9003	-17.2198	3.51746	-11.668			-28.7637	13.1969	-5.16667	-7.71611	-6.56989	-2.3437	10.3164	5.50852	-0.364714	-37.1169	11.205	8.92787	-34.6455
2.17	23.8752	-36.3193	-33.6426	-6.55943	-2.04918	3.29073	5.86194	14.7172	9.97023	-26.0216	-17.2846	3.67808	-11.7864			-28.7966	13.2474	-5.38567	-7.83581	-6.59618	-2.40492	10.3027	5.29987	-0.492786	-37.1861	11.3014	8.92826	-34.7612
2.172	23.8406	-36.4619	-33.6257	-6.61737	-2.10441	3.34522	5.9023	14.6786	10.0387	-26.1699	-17.283	3.82904	-11.9478			-28.905	13.1933	-5.75184	-7.92855	-6.62291	-2.4722	10.2553	5.15439	-0.563612	-37.22	11.4419	8.9028	-34.9154
2.174	23.822	-36.65	-33.627	-6.62263	-2.12418	3.39511	5.97437	14.6173	10.0723	-26.3193	-17.2808	3.9116	-12.1045			-29.0553	13.0489	-6.22532	-7.97574	-6.6296	-2.53449	10.2375	5.06029	-0.631694	-37.2899	11.5467	8.87361	-35.0943
2.176	23.8365	-36.8483	-33.6114	-6.56888	-2.17538	3.44849	6.04859	14.5407	10.0953	-26.4307	-17.2071	4.14505	-12.2246			-29.2133	12.8856	-6.69052	-7.99681	-6.64384	-2.61724	10.2512	5.071	-0.771092	-37.3131	11.653	8.85489	-35.2243
2.178	23.9014	-37.0398	-33.5891	-6.55634	-2.21278	3.5103	6.09843	14.5185	10.1517	-26.4172	-17.15	4.20136	-12.2925			-29.2776	12.8201	-6.90921	-7.92446	-6.64636	-2.686	10.2694	5.09179	-0.813078	-37.3015	11.7896	8.86402	-35.2841
2.18	23.9763	-37.133	-33.5096	-6.5408	-2.20447	3.55235	6.06978	14.543	10.2003	-26.3891	-17.1315	4.42247	-12.2674			-29.317	12.6923	-7.06374	-7.77951	-6.61531	-2.73721	10.2639	5.08057	-0.862344	-37.28	11.9346	8.82988	-35.2461
2.182	24.1116	-37.111	-33.454	-6.42264	-2.1121	3.57538	5.99822	14.647	10.2313	-26.3112	-17.181	4.5596	-12.2881			-29.2118	12.5177	-7.01323	-7.68575	-6.58624	-2.78223	10.2717	5.1136	-0.965006	-37.2696	12.004	8.79406	-35.1023
2.184	24.323	-36.973	-33.5134	-6.24876	-2.0053	3.56276	5.95057	14.8341	10.2928	-26.1543	-17.2798	4.80434	-12.2336			-29.1415	12.2881	-6.89219	-7.55919	-6.54933	-2.77817	10.319	5.22672	-1.03165	-37.2443	12.0293	8.7635	-34.8497
2.186	24.6014	-36.8209	-33.6643	-6.08845	-1.90872	3.55645	5.89876	15.0273	10.3435	-26.0417	-17.378	5.00451	-12.1821			-29.0644	12.1958	-6.77401	-7.42528	-6.5002	-2.71389	10.3814	5.31916	-1.10466	-37.2754	12.0284	8.75067	-34.5435
2.188	24.9234	-36.5889	-33.812	-5.95882	-1.81094	3.54619	5.85539	15.1599	10.4101	-25.9853	-17.4099	5.13181	-12.0324			-29.0047	12.2714	-6.81771	-7.32658	-6.46565	-2.61355	10.4407	5.36018	-1.18845	-37.2436	11.9967	8.82151	-34.3133
2.19	25.2158	-36.3359	-33.7831	-5.82813	-1.78319	3.55169	5.8289	15.2063	10.4864	-26.0033	-17.4312	5.22768	-12.0559			-28.9125	12.4636	-7.03511	-7.24227	-6.45628	-2.53869	10.4709	5.28875	-1.29646	-37.2249	11.9393	8.91314	-34.1353
2.192	25.4931	-36.2168	-33.7248	-5.78455	-1.78116	3.49852	5.81885	15.238	10.5879	-26.0266	-17.3324	5.12929	-12.1814			-28.8544	12.5816	-7.42073	-7.15915	-6.45592	-2.53386	10.4553	5.2921	-1.34771	-37.2319	11.9114	9.03497	-34.136
2.194	25.7022	-36.2368	-33.7516	-5.78673	-1.77376	3.44008	5.81609	15.2693	10.6523	-26.083	-17.1886	5.15922	-12.2892			-28.7557	12.5214	-7.86246	-7.11949	-6.49109	-2.56722	10.4334	5.17857	-1.32702	-37.2996	11.9197	9.15432	-34.3281
2.196	25.8181	-36.2982	-33.7371	-5.77434	-1.82783	3.40866	5.85936	15.2835	10.6792	-26.1568	-17.0056	4.96838	-12.3108			-28.6563	12.4556	-8.38491	-7.15004	-6.52047	-2.63033	10.3891	5.06108	-1.27058	-37.4023	11.9343	9.08578	-34.629
2.198	25.8722	-36.3248	-33.7666	-5.81475	-1.86236	3.41317	5.9262	15.266	10.7056	-26.2356	-16.9122	4.87592	-12.304			-28.5865	12.4193	-8.7876	-7.2182	-6.61041	-2.69347	10.3846	5.10168	-1.21246	-37.5145	11.9461	8.95247	-34.8811
2.2	25.8308	-36.416	-33.7634	-5.95076	-1.90553	3.44967	5.97268	15.2318	10.7277	-26.317	-16.7875	4.88663	-12.3532			-28.5523	12.4087	-9.02821	-7.34642	-6.69249	-2.73988	10.4274	5.22532	-1.14524	-37.6134	11.9854	8.71431	-34.9025
2.202	25.6736	-36.4617	-33.6744	-6.05226	-1.95409	3.53707	5.95749	15.1594	10.7248	-26.3886	-16.694	4.94931	-12.2981			-28.5201	12.3953	-8.99486	-7.53659	-6.72689	-2.79695	10.4579	5.40315	-1.1517	-37.6403	12.0229	8.55182	-34.8575
2.204	25.5558	-36.4698	-33.6275	-6.14757	-2.02191	3.62902	5.90159	15.1338	10.6694	-26.4935	-16.626	4.98845	-12.3004			-28.5633	12.3337	-8.82052	-7.70105	-6.77433	-2.86026	10.4958	5.57558	-1.17429	-37.6344	12.0472	8.45942	-34.7486
2.206	25.4687	-36.4351	-33.6611	-6.21118	-2.07434	3.72292	5.88004	15.0902	10.5773	-26.6172	-16.6042	5.01983	-12.3467			-28.6567	12.2606	-8.60965	-7.81728	-6.79564	-2.90437	10.5625	5.63198	-1.20074	-37.6367	11.9732	8.41688	-34.5624
2.208	25.4622	-36.4076	-33.8096	-6.26227	-2.11589	3.82928	5.85211	14.9696	10.5297	-26.7363	-16.5831	5.00984	-12.4599			-28.8282	12.2876	-8.48147	-7.82835	-6.75699	-2.92568	10.6565	5.67591	-1.33603	-37.6249	11.9896	8.43482	-34.3951
2.21	25.4586	-36.3693	-33.8658	-6.27229	-2.0601	3.94535	5.86132	14.9334	10.4321	-26.8108	-16.6846	4.95015	-12.6003			-28.9384	12.4619	-8.55099	-7.78796	-6.74227	-2.90286	10.7618	5.75873	-1.45852	-37.5919	12.0064	8.53576	-34.1478
2.212	25.5463	-36.4348	-33.8436	-6.25341	-1.94915	4.03036	5.88855	14.9422	10.3499	-26.8262	-16.8161	4.88194	-12.7941			-28.9137	12.5545	-8.78002	-7.71222	-6.72008	-2.88543	10.8677	5.8212	-1.58553	-37.5869	12.1205	8.75869	-33.8549
2.214	25.7136	-36.5859	-33.8004	-6.15216	-1.85219	4.08705	5.90197	15.0208	10.2322	-26.7418	-16.949	4.87416	-12.8414			-28.7807	12.4727	-9.1524	-7.67977	-6.65337	-2.87017	10.9323	5.77991	-1.63265	-37.6351	12.2202	9.01825	-33.6559
2.216	25.9826	-36.785	-33.8429	-6.07085	-1.73732	4.04996	5.90293	15.1245	10.1477	-26.6066	-17.0289	4.82048	-13.0633			-28.677	12.2914	-9.61649	-7.67584	-6.64938	-2.849	10.9246	5.63744	-1.67847	-37.7076	12.3524	9.33233	-33.367
2.218	26.2701	-37.006	-33.8573	-5.93989	-1.67945	3.96834	5.91069	15.1497	10.0491	-26.5159	-17.0807	4.65767	-13.1177			-28.5873	12.1695	-10.0943	-7.65407	-6.64023	-2.85237	10.8714	5.47393	-1.74696	-37.7657	12.4102	9.49549	-33.247
2.22	26.5206	-37.2506	-33.882	-5.84024	-1.64972	3.85084	5.90047	15.1502	10.0523	-26.4573	-17.0594	4.60013	-13.1404			-28.5083	12.0598	-10.5255	-7.61775	-6.62388	-2.91644	10.8095	5.30075	-1.77297	-37.7927	12.3917	9.48091	-33.2666
2.222	26.8365	-37.3925	-33.9029	-5.68562	-1.62735	3.77902	5.91595	15.1591	10.1298	-26.4073	-16.9761	4.58622	-13.0604			-28.4163	11.9211	-10.9393	-7.56069	-6.58648	-2.99092	10.7702	5.17293	-1.77394	-37.737	12.3399	9.36499	-33.5588
2.224	27.113	-37.5258	-33.9188	-5.53883	-1.64874	3.75437	5.95938	15.1883	10.2194	-26.4495	-16.7818	4.69864	-13.0613			-28.3327	11.7351	-11.1932	-7.53043	-6.59018	-3.01	10.7406	5.06142	-1.71329	-37.7732	12.381	9.2616	-33.808
2.226	27.4236	-37.6953	-33.9298	-5.43525	-1.70408	3.74262	5.95518	15.2014	10.2899	-26.5278	-16.6012	4.80696	-13.0576			-28.2322	11.4252	-11.1738	-7.4943	-6.67288	-2.98848	10.6678	4.86766	-1.58896	-37.8412	12.4543	9.17587	-34.0644
2.228	27.7399	-37.922	-33.858	-5.30515	-1.77066	3.71332	5.90946	15.247	10.3604	-26.6279	-16.426	5.03035	-13.0184			-28.1495	11.214	-11.0333	-7.50058	-6.77824	-2.95516	10.634	4.71404	-1.49442	-37.9599	12.5305	9.06356	-34.1644
2.23	28.0961	-38.0916	-33.8768	-5.24612	-1.84281	3.7268	5.8653	15.2927	10.3714	-26.7264	-16.268	5.20255	-12.9278			-28.0881	11.1063	-10.8097	-7.493	-6.88297	-2.95212	10.6271	4.52218	-1.38982	-38.0362	12.643	9.00452	-34.1427
2.232	28.1779	-38.2403	-33.9578	-5.21766	-1.86796	3.77856	5.82634	15.3102	10.3524	-26.8434	-16.0913	5.45551	-12.8874			-28.0028	11.0853	-10.6183	-7.44839	-6.99306	-2.95207	10.6478	4.30681	-1.39485	-38.0696	12.7437	8.89407	-34.0083
2.234	28.1261	-38.307	-34.0131	-5.21328	-1.91314	3.84307	5.78976	15.3066	10.3368	-26.9511	-15.899	5.63676	-12.9082			-27.9588	11.0971	-10.5503	-7.46292	-7.06534	-2.94713	10.6849	4.14196	-1.40858	-38.0643	12.8148	8.83025	-33.8979
2.236	27.9454	-38.3859	-34.0631	-5.22658	-1.97015	3.8975	5.7717	15.298	10.3283	-27.0463	-15.729	5.82681	-13.0401			-27.9764	11.0889	-10.654	-7.42895	-7.12099	-2.96604	10.7635	3.9513	-1.48603	-38.0571	12.9249	8.76163	-33.6404
2.238	27.7755	-38.5299	-34.1197	-5.24607	-2.01023	3.98177	5.75523	15.318	10.3053	-27.0936	-15.6405	6.02115	-13.1075			-27.9588	11.1841	-10.9404	-7.40978	-7.15102	-2.99037	10.8409	3.73177	-1.54752	-38.0386	13.0488	8.6862	-33.5659
2.24	27.69	-38.625	-34.1789	-5.2988	-2.04099	4.06564	5.73842	15.2588	10.3086	-27.0591	-15.6289	6.18313	-13.3485			-27.9855	11.3217	-11.3393	-7.39033	-7.12823	-3.01139	10.9102	3.64822	-1.67604	-38.0502	13.1372	8.66131	-33.4301
2.242	27.5548	-38.754	-34.229	-5.43659	-2.04117	4.16212	5.7311	15.1709	10.33	-26.9168	-15.6237	6.36896	-13.6578			-28.1122	11.3907	-11.8088	-7.34094	-7.11208	-3.03729	11.0089	3.55571	-1.76932	-38.0401	13.1487	8.58539	-33.3921
2.244	27.4713	-38.8418	-34.2831	-5.51188	-1.99234	4.25236	5.74826	15.1581	10.3803	-26.7409	-15.7063	6.49551	-13.9786			-28.2624	11.3585	-12.288	-7.32189	-7.05226	-3.08554	11.1007	3.45339	-1.85567	-38.0515	13.1833	8.52211	-33.3121
2.246	27.4579	-38.9349	-34.3817	-5.53155	-1.98033	4.34945	5.7714	15.0971	10.4123	-26.6202	-15.756	6.7566	-14.2282			-28.2622	11.1403	-12.7707	-7.294	-7.0471	-3.11822	11.1458	3.4872	-1.94149	-38.0934	13.1871	8.44355	-33.2177
2.248	27.6668	-38.9677	-34.4484	-5.53136	-1.98132	4.43373	5.79277	15.1216	10.4507	-26.5923	-15.8006	6.95265	-14.4821			-28.1857	10.94	-13.2018	-7.28501	-7.00916	-3.13736	11.1198	3.52292	-2.00256	-38.1385	13.1138	8.35789	-33.1906
2.25	27.8735	-38.9782	-34.4611	-5.53442	-1.96497	4.5219	5.79533	15.1239	10.4976	-26.5757	-15.7477	7.10234	-14.6572			-28.1114	10.7395	-13.372	-7.31104	-7.03241	-3.12165	11.076	3.62845	-2.09881	-38.1272	12.9741	8.41911	-33.1456
2.252	28.1463	-39.0153	-34.4734	-5.4794	-1.96473	4.59138	5.79828	15.1834	10.5252	-26.6351	-15.6698	7.2704	-14.7338			-28.0415	10.6279	-13.3883	-7.3271	-7.03819	-3.09372	11.0368	3.80058	-2.14578	-38.1036	12.8874	8.45613	-33.0801
2.254	28.3942	-39.0827	-34.4274	-5.42171	-1.96106	4.63212	5.80611	15.2313	10.5961	-26.6968	-15.5457	7.28322	-14.635			-27.9775	10.4995	-13.1946	-7.33272	-7.05298	-3.05984	10.9842	3.9912	-2.22361	-38.1047	12.8506	8.55033	-32.8956
2.256	28.6347	-39.1886	-34.4094	-5.30933	-1.94443	4.6194	5.80647	15.3066	10.6003	-26.7914	-15.4652	7.25407	-14.4622			-27.8414	10.2565	-12.9522	-7.33719	-7.05075	-3.03967	10.9044	4.21905	-2.32511	-38.16	12.8228	8.61616	-32.7289
2.258	28.8851	-39.475	-34.4404	-5.19378	-1.92219	4.54096	5.81875	15.456	10.641	-26.9331	-15.3876	7.34084	-14.2792			-27.7535	10.0772	-12.7618	-7.37974	-7.11327	-3.03047	10.8566	4.47237	-2.38703	-38.2022	12.7659	8.66674	-32.4989
2.26	29.1181	-39.7643	-34.5116	-5.04605	-1.88265	4.46538	5.81248	15.5735	10.6787	-27.111	-15.3364	7.08721	-14.2084			-27.6411	10.0946	-12.5487	-7.43403	-7.1493	-3.08057	10.8509	4.63201	-2.4883	-38.2387	12.7215	8.67136	-32.2622
2.262	29.387	-40.0232	-34.5226	-4.85513	-1.83928	4.38609	5.79816	15.6638	10.7292	-27.2348	-15.3565	7.04974	-14.0696			-27.4957	10.1743	-12.4817	-7.4787	-7.17657	-3.1668	10.8574	4.65993	-2.55107	-38.2519	12.7321	8.5547	-32.1633
2.264	29.6433	-40.2034	-34.4764	-4.68574	-1.81042	4.32452	5.76439	15.6413	10.7674	-27.2429	-15.4851	6.97885	-14.0462			-27.3541	10.1743	-12.6358	-7.52034	-7.2098	-3.22312	10.9003	4.59519	-2.62241	-38.2447	12.7923	8.33715	-32.1087
2.266	29.8751	-40.2744	-34.4443	-4.52903	-1.77881	4.30352	5.75655	15.6651	10.8053	-27.2282	-15.6627	7.02135	-14.0797			-27.2104	10.1813	-12.9366	-7.56687	-7.26165	-3.22116	10.9581	4.54394	-2.73885	-38.2485	12.906	8.11373	-32.1877
2.268	29.9691	-40.238	-34.4697	-4.41045	-1.72063	4.30144	5.73476	15.6466	10.7939	-27.2024	-15.7804	7.02076	-14.1905			-27.121	10.0453	-13.3242	-7.57579	-7.27951	-3.21012	11.0293	4.38187	-2.82386	-38.2758	13.0474	8.00517	-32.3184
2.27	29.9833	-40.0811	-34.4904	-4.28767	-1.63807	4.32124	5.71249	15.6776	10.8474	-27.1396	-15.8386	7.02664	-14.3476			-27.0333	9.9654	-13.5784	-7.53458	-7.34784	-3.20576	11.1139	4.22913	-2.87797	-38.3046	13.1941	7.9788	-32.4707
2.272	29.9507	-39.9274	-34.4574	-4.2188	-1.57009	4.3952	5.68956	15.6864	10.8821	-27.064	-15.8636	6.97269	-14.4823			-26.9961	9.94099	-13.8932	-7.47656	-7.36539	-3.21563	11.1849	4.0445	-2.94988	-38.3411	13.2795	7.99026	-32.6504
2.274	29.8613	-39.9303	-34.4532	-4.19287	-1.50766	4.45903	5.66803	15.7225	10.943	-26.9548	-15.852	7.00386	-14.5213			-26.9926	9.86483	-14.0982	-7.41394	-7.37001	-3.2174	11.2003	3.85781	-3.03556	-38.3034	13.2773	8.02211	-32.6953
2.276	29.7445	-40.1658	-34.3948	-4.16521	-1.49871	4.53621	5.63405	15.7202	10.9712	-26.9098	-15.7989	7.03625	-14.596			-27.0034	9.71342	-14.151	-7.35623	-7.40559	-3.23319	11.2182	3.7021	-3.15521	-38.2481	13.2536	8.19304	-32.602
2.278	29.6225	-40.509	-34.3988	-4.08792	-1.5598	4.60382	5.60902	15.753	10.9958	-26.9108	-15.6009	7.06761	-14.6826			-27.1526	9.39835	-14.0903	-7.35832	-7.45248	-3.21392	11.2173	3.47504	-3.24453	-38.2453	13.1889	8.38678	-32.4063
2.28	29.6337	-40.889	-34.482	-4.00502	-1.61729	4.71555	5.59216	15.7166	11.0322	-26.9159	-15.4125	7.13194	-14.7847			-27.3658	9.18319	-13.9002	-7.41082	-7.52573	-3.19512	11.1996	3.24492	-3.35346	-38.2693	13.2149	8.64633	-32.1441
2.282	29.7011	-41.1759	-34.6834	-3.88615	-1.66839	4.8326	5.61201	15.739	11.0718	-26.9405	-15.2055	7.06412	-14.9252			-27.465	9.14336	-13.5584	-7.4577	-7.58003	-3.15123	11.228	3.05469	-3.4956	-38.2801	13.1786	8.86067	-31.8662
2.284	29.7412	-41.3221	-34.8262	-3.77315	-1.68832	4.92243	5.66241	15.7454	11.1371	-26.938	-14.9925	7.04728	-14.9783			-27.4156	9.22016	-13.2312	-7.54839	-7.62154	-3.09558	11.2688	2.83193	-3.60121	-38.282	13.1382	8.8548	-31.6465
2.286	29.834	-41.324	-34.8801	-3.68931	-1.73442	4.96282	5.70892	15.7285	11.2304	-26.9541	-14.8445	6.93727	-15.0373			-27.2642	9.24402	-13.0965	-7.65738	-7.64592	-3.07915	11.351	2.5908	-3.66909	-38.3042	13.0751	8.84159	-31.4129
2.288	30.0112	-41.2404	-34.7879	-3.55981	-1.73242	4.93696	5.75977	15.7462	11.3158	-26.9901	-14.691	6.87582	-15.0082			-27.0928	9.20177	-13.0858	-7.7625	-7.66919	-3.15115	11.4107	2.39364	-3.69548	-38.3166	13.0211	8.77167	-31.2697
2.29	30.2748	-41.0014	-34.7678	-3.45503	-1.76452	4.89133	5.79613	15.7009	11.3358	-27.0269	-14.5561	6.94474	-15.0044			-26.9407	9.13564	-13.2034	-7.87116	-7.68615	-3.26938	11.4536	2.22603	-3.65837	-38.3491	12.9832	8.64539	-31.1322
2.292	30.4951	-40.8259	-34.7622	-3.3222	-1.77201	4.84526	5.81386	15.6652	11.3334	-27.0729	-14.5047	6.96016	-14.9992			-26.8059	9.11247	-13.4332	-7.97388	-7.68275	-3.37641	11.4659	2.11327	-3.6108	-38.3861	13.0075	8.59754	-31.3477
2.294	30.7294	-40.9034	-34.7577	-3.13747	-1.77073	4.87599	5.77465	15.5994	11.2932	-27.1391	-14.5059	7.1737	-15.1068			-26.7055	9.13941	-13.7528	-8.03729	-7.6551	-3.45052	11.4505	2.0502	-3.52562	-38.423	13.0151	8.47566	-31.5603
2.296	30.9969	-41.2209	-34.7921	-2.97021	-1.81955	4.8992	5.69577	15.5979	11.2366	-27.2282	-14.5736	7.36966	-15.191			-26.5876	9.01463	-14.053	-8.09887	-7.62208	-3.49728	11.3966	2.0006	-3.37641	-38.4771	13.0267	8.36475	-31.8375
2.298	31.2229	-41.7146	-34.7951	-2.79002	-1.9117	4.90673	5.62384	15.627	11.0746	-27.3376	-14.6288	7.51495	-15.2844			-26.4763	8.61559	-14.3057	-8.12013	-7.60774	-3.47238	11.3394	2.01319	-3.31279	-38.5675	13.0559	8.2983	-31.936
2.3	31.4758	-42.1882	-34.6714	-2.60658	-2.0104	4.93822	5.5523	15.6437	10.9051	-27.4388	-14.8059	7.66427	-15.2213			-26.35	8.17953	-14.526	-8.16304	-7.61554	-3.43633	11.2981	2.02576	-3.31983	-38.6778	13.0372	8.19227	-31.9425
2.302	31.725	-42.7106	-34.6129	-2.49861	-2.06728	4.98953	5.5123	15.6704	10.7754	-27.5016	-14.9788	7.8178	-15.1156			-26.2064	7.85879	-14.6988	-8.17806	-7.63706	-3.39335	11.276	2.11722	-3.32699	-38.8223	12.9483	8.1352	-31.9489
2.304	31.9586	-43.086	-34.5826	-2.43821	-2.11418	5.08761	5.51972	15.7617	10.6735	-27.5369	-15.0822	7.95768	-14.9511			-26.1121	7.7336	-14.7516	-8.15329	-7.60441	-3.33234	11.2761	2.23427	-3.37151	-38.9637	12.802	8.06777	-31.9632
2.306	32.1826	-43.1922	-34.6275	-2.38662	-2.04337	5.18819	5.55999	15.8911	10.6405	-27.5474	-15.1196	8.11601	-14.8718			-25.9707	7.74145	-14.7437	-8.13369	-7.57704	-3.29514	11.3081	2.49773	-3.37635	-39.0509	12.6949	7.95483	-31.8435
2.308	32.4463	-43.0952	-34.743	-2.38675	-2.00182	5.28702	5.60531	16.0865	10.6894	-27.5571	-15.1538	8.26731	-14.9482			-25.8544	7.81647	-14.5517	-8.08734	-7.58107	-3.22627	11.3655	2.80193	-3.36914	-39.0429	12.6627	7.90223	-31.6298
2.31	32.515	-42.9159	-34.859	-2.30266	-1.94827	5.33749	5.66346	16.1638	10.7391	-27.5383	-15.1574	8.4272	-15.0406			-25.8353	7.89664	-14.3929	-7.97521	-7.64074	-3.18423	11.4101	3.05404	-3.37688	-38.9576	12.6196	7.86589	-31.4297
2.312	32.4782	-42.6922	-35.027	-2.22985	-1.88647	5.33883	5.6593	16.1474	10.7639	-27.5208	-15.0821	8.56192	-15.151			-25.8109	8.03293	-14.1567	-7.8097	-7.65086	-3.21749	11.4491	3.02292	-3.37176	-38.8575	12.6295	7.86358	-31.2757
2.314	32.3083	-42.4541	-35.0736	-2.15909	-1.8279	5.29913	5.64788	16.0853	10.8057	-27.5271	-14.9567	8.67525	-15.2806			-25.8608	8.14633	-13.9492	-7.59665	-7.68099	-3.34841	11.4291	2.90539	-3.42777	-38.7782	12.6607	7.93744	-31.1087
2.316	32.1779	-42.4302	-35.0374	-2.12167	-1.75272	5.28473	5.61077	16.0978	10.8733	-27.4993	-14.8692	8.71882	-15.4353			-25.9447	8.16558	-13.8695	-7.40837	-7.68186	-3.48978	11.3634	2.72083	-3.44603	-38.7045	12.8097	8.02505	-30.9254
2.318	32.0336	-42.6943	-34.9704	-2.2017	-1.68902	5.29095	5.55643	16.0874	10.9137	-27.4201	-14.8098	8.62352	-15.5478			-26.0532	8.16673	-13.9485	-7.25162	-7.72709	-3.58653	11.3285	2.43845	-3.50497	-38.635	12.9521	8.11927	-30.6339
2.32	31.8873	-43.1658	-34.9277	-2.22691	-1.6568	5.32328	5.49536	16.1153	10.9911	-27.3701	-14.773	8.5875	-15.649			-26.2051	7.91358	-14.0522	-7.12803	-7.7476	-3.65736	11.3385	2.25421	-3.53574	-38.6199	13.0516	8.22003	-30.3356
2.322	31.799	-43.6573	-34.9615	-2.25744	-1.63443	5.35058	5.42704	16.0872	11.0234	-27.3782	-14.7575	8.60955	-15.6774			-26.2511	7.69801	-14.122	-7.02022	-7.79636	-3.65872	11.3692	2.03232	-3.59881	-38.6429	13.1281	8.24236	-30.0906
2.324	31.7921	-44.1432	-34.8836	-2.21826	-1.61385	5.37337	5.38086	16.0978	11.0879	-27.3995	-14.8402	8.43046	-15.6459			-26.2302	7.51218	-14.2427	-7.00391	-7.83272	-3.57564	11.3802	1.81675	-3.68449	-38.6946	13.0696	8.2278	-29.9433
2.326	31.9171	-44.5332	-34.8349	-2.13174	-1.64422	5.39405	5.34507	16.1012	11.1448	-27.4313	-14.9049	8.34259	-15.6013			-26.1177	7.33478	-14.4609	-7.15553	-7.86957	-3.51403	11.3717	1.63527	-3.76428	-38.7623	12.9949	8.10151	-29.897
2.328	32.1136	-44.7907	-34.7838	-2.0371	-1.66082	5.46925	5.33508	16.1079	11.1997	-27.4664	-14.8451	8.44983	-15.6101			-25.968	7.05673	-14.7733	-7.35643	-7.91021	-3.43855	11.3484	1.3925	-3.85006	-38.8428	12.9139	7.90406	-29.8957
2.33	32.3109	-44.8075	-34.7718	-1.90967	-1.69544	5.53459	5.33422	16.0774	11.2442	-27.5023	-14.784	8.47374	-15.7145			-25.829	6.90941	-15.0786	-7.52361	-7.95854	-3.37194	11.3479	1.21514	-3.92981	-38.9406	12.9131	7.73861	-30.0394
2.332	32.5128	-44.7128	-34.8575	-1.8298	-1.73971	5.5676	5.36918	15.9948	11.2759	-27.5349	-14.6877	8.58074	-15.8808			-25.7042	6.99706	-15.2403	-7.66443	-7.99695	-3.33269	11.3575	1.10715	-4.01902	-38.9916	12.8625	7.50777	-30.2363
2.334	32.6974	-44.5401	-34.9978	-1.72812	-1.82172	5.5496	5.40124	15.9497	11.3195	-27.595	-14.5452	8.7509	-16.0479			-25.6175	7.2935	-15.4008	-7.81875	-8.00103	-3.35279	11.4027	1.02386	-4.09168	-39.0062	12.8592	7.25606	-30.345
2.336	32.9095	-44.3851	-35.018	-1.59562	-1.89101	5.51655	5.43953	15.9103	11.3826	-27.677	-14.4292	8.86012	-16.102			-25.4982	7.66973	-15.5356	-7.98031	-8.01256	-3.463	11.4676	1.06239	-4.14632	-39.0031	12.8162	7.11337	-30.369
2.338	33.1627	-44.2178	-34.8785	-1.48603	-1.93593	5.5092	5.47222	15.9594	11.4161	-27.7862	-14.3331	8.95664	-16.0111			-25.3675	7.95498	-15.4927	-8.09185	-7.98659	-3.62225	11.5284	1.09584	-4.24095	-39.0049	12.8006	6.97654	-30.4386
2.34	33.4332	-44.1908	-34.6405	-1.36374	-1.97299	5.51704	5.47894	15.9837	11.4716	-27.8898	-14.2166	8.9397	-15.8024			-25.2697	8.04979	-15.249	-8.19867	-7.96247	-3.73128	11.5596	1.1249	-4.31505	-39.0029	12.7765	7.09492	-30.5167
2.342	33.737	-44.3075	-34.3419	-1.27221	-1.94069	5.54733	5.45625	15.9784	11.5182	-27.9355	-14.13	8.90247	-15.6847			-25.0962	7.96284	-14.9989	-8.24289	-7.96971	-3.84245	11.5095	1.21794	-4.38011	-39.0011	12.756	7.22928	-30.4642
2.344	34.0122	-44.5803	-34.0528	-1.20614	-1.84387	5.56949	5.43011	16.0096	11.529	-27.9364	-14.0444	8.84948	-15.5884			-24.9174	7.76602	-14.8886	-8.21428	-7.99775	-3.86302	11.4632	1.38611	-4.46646	-39.0243	12.7577	7.40628	-30.3268
2.346	34.3048	-44.9447	-33.9	-1.09866	-1.73235	5.60942	5.3753	16.1303	11.5735	-27.8639	-13.8991	8.83177	-15.6138			-24.7813	7.61121	-14.9026	-8.1262	-7.99938	-3.79541	11.4303	1.61736	-4.53069	-39.0812	12.7359	7.69567	-30.027
2.348	34.5587	-45.3106	-33.9468	-1.02344	-1.60744	5.64799	5.31605	16.3604	11.6386	-27.7583	-13.7791	8.63244	-15.6577			-24.6447	7.34231	-14.9682	-7.95537	-7.9758	-3.70021	11.3723	1.94568	-4.61146	-39.1239	12.7678	8.05332	-29.7314
2.35	34.7266	-45.6268	-34.2064	-1.00691	-1.50522	5.69881	5.27496	16.5495	11.669	-27.6645	-13.692	8.5772	-15.7269			-24.6008	6.97704	-14.9951	-7.75037	-7.94881	-3.61077	11.3182	2.22048	-4.69647	-39.1505	12.8156	8.23847	-29.3527
2.352	34.6977	-45.7845	-34.5936	-0.966896	-1.42939	5.71962	5.24814	16.6451	11.7067	-27.6075	-13.6678	8.46145	-15.7683			-24.6117	6.77055	-15.0125	-7.54816	-7.93563	-3.56653	11.2802	2.27468	-4.79014	-39.1602	12.8814	8.32049	-29.0731
2.354	34.5874	-45.8138	-34.8126	-0.987084	-1.37612	5.68344	5.22358	16.6956	11.7654	-27.5978	-13.6578	8.42955	-15.7219			-24.6245	6.84814	-15.0905	-7.37159	-7.90185	-3.58698	11.2744	2.2717	-4.85835	-39.1705	12.9387	8.30718	-28.8969
2.356	34.457	-45.7351	-34.8908	-1.03558	-1.37498	5.67414	5.2453	16.6593	11.8158	-27.6174	-13.6741	8.51694	-15.7316			-24.6527	7.00911	-15.1528	-7.22463	-7.92938	-3.64735	11.2936	2.17147	-4.98407	-39.1725	12.9837	8.20933	-28.8492
2.358	34.3191	-45.6021	-34.8103	-1.08403	-1.44938	5.70234	5.27598	16.5827	11.8835	-27.6508	-13.7825	8.62546	-15.7229			-24.7181	7.17368	-15.2329	-7.14207	-7.96887	-3.75166	11.3683	2.04072	-5.07465	-39.1784	12.9908	8.08258	-28.8849
2.36	34.1367	-45.4811	-34.6093	-1.10881	-1.51591	5.74521	5.27136	16.5806	11.9376	-27.6918	-13.8421	8.69732	-15.6639			-24.677	7.40491	-15.2617	-7.12736	-8.07982	-3.87835	11.4565	1.8662	-5.22495	-39.2233	12.9322	8.00766	-28.9708
2.362	33.8911	-45.2603	-34.4346	-1.01044	-1.59796	5.80528	5.27307	16.5651	11.9833	-27.7208	-13.8305	8.80869	-15.5699			-24.7139	7.66619	-15.2978	-7.23334	-8.14643	-3.99942	11.5549	1.69959	-5.30509	-39.2813	12.832	7.8892	-29.1061
2.364	33.7361	-45.0979	-34.2036	-0.881986	-1.68784	5.82572	5.28185	16.5716	12.0663	-27.7701	-13.749	8.93305	-15.38			-24.7546	7.84036	-15.3516	-7.42699	-8.21115	-4.0858	11.6036	1.48725	-5.38889	-39.3252	12.7667	7.77767	-29.1687
2.366	33.7331	-45.0376	-34.0282	-0.801822	-1.77085	5.84928	5.28793	16.544	12.1845	-27.8564	-13.6279	9.05797	-15.2554			-24.7859	7.89481	-15.4352	-7.6323	-8.29234	-4.10344	11.6606	1.28467	-5.40784	-39.3368	12.7195	7.63627	-29.2796
2.368	33.9189	-45.1138	-33.9442	-0.744506	-1.82865	5.87614	5.30456	16.4911	12.1835	-27.98	-13.4902	9.15904	-15.1804			-24.8313	7.73797	-15.5198	-7.87525	-8.36706	-4.02251	11.691	1.06257	-5.36584	-39.4138	12.6531	7.47373	-29.3403
2.37	34.1232	-45.346	-33.9999	-0.670824	-1.87926	5.89403	5.3073	16.4377	12.1654	-28.1084	-13.393	9.28904	-15.1736			-24.7693	7.40922	-15.6291	-8.05963	-8.42142	-3.91194	11.6656	0.763224	-5.3104	-39.4804	12.6158	7.35848	-29.2905
2.372	34.364	-45.5564	-34.2513	-0.595742	-1.93493	5.93177	5.28331	16.4078	12.1106	-28.2068	-13.2624	9.43163	-15.1999			-24.7467	7.24263	-15.6845	-8.22053	-8.46896	-3.81968	11.5363	0.587902	-5.17797	-39.5166	12.5473	7.23932	-29.1383
2.374	34.6005	-45.8021	-34.5868	-0.530866	-1.97539	5.92598	5.27512	16.3131	12.0486	-28.2375	-13.1587	9.56777	-15.2335			-24.6386	7.18197	-15.6714	-8.28404	-8.4519	-3.80057	11.4119	0.518938	-5.04876	-39.5608	12.5001	7.10994	-28.9506
2.376	34.8303	-46.0416	-34.8745	-0.51254	-1.92879	5.89593	5.24524	16.2227	12.0241	-28.2201	-13.0209	9.688	-15.2796			-24.5811	7.18689	-15.6567	-8.32034	-8.42598	-3.8351	11.3066	0.483686	-4.9932	-39.5811	12.4719	6.99289	-28.7614
2.378	35.0267	-46.2064	-34.9142	-0.49042	-1.84743	5.90156	5.22336	16.1718	11.8977	-28.1617	-12.8576	9.78051	-15.4256			-24.4564	7.13234	-15.7894	-8.33745	-8.38674	-3.89773	11.255	0.487088	-4.96189	-39.6024	12.4374	6.87641	-28.6919
2.38	35.2386	-46.1942	-34.7425	-0.449246	-1.73852	5.92983	5.23642	16.1796	11.7773	-28.0766	-12.7339	9.87035	-15.6117			-24.3667	7.07077	-15.9774	-8.33069	-8.37255	-3.99678	11.2573	0.529032	-5.01676	-39.6035	12.4401	6.7685	-28.649
2.382	35.3348	-46.0389	-34.4877	-0.447286	-1.65144	5.96387	5.23659	16.2012	11.6943	-27.9829	-12.6454	10.0034	-15.8009			-24.2778	7.05445	-16.0988	-8.31275	-8.34967	-4.12149	11.2797	0.622678	-4.953	-39.5873	12.4888	6.666	-28.7053
2.384	35.3614	-45.8052	-34.2352	-0.332766	-1.61986	6.00267	5.24469	16.2482	11.6206	-27.9206	-12.6366	10.1292	-15.9396			-24.203	7.09383	-16.1652	-8.29094	-8.36431	-4.24077	11.3276	0.781242	-4.95575	-39.5546	12.5487	6.59964	-28.7116
2.386	35.3998	-45.5481	-34.0719	-0.26201	-1.60329	6.02343	5.20346	16.3199	11.5824	-27.8918	-12.6299	10.2354	-15.9211			-24.1132	7.17676	-16.2853	-8.23372	-8.39122	-4.31427	11.4317	0.999404	-4.94144	-39.4836	12.6439	6.57616	-28.7588
2.388	35.4289	-45.3891	-33.9976	-0.187908	-1.61445	6.05318	5.18211	16.5122	11.581	-27.9104	-12.6571	10.3333	-15.7394			-24.0559	7.32845	-16.3736	-8.16642	-8.40336	-4.35616	11.5302	1.24622	-4.97036	-39.471	12.7327	6.58122	-28.872
2.39	35.4311	-45.285	-34.0183	-0.164486	-1.64912	6.08766	5.15963	16.6889	11.6074	-27.9352	-12.7566	10.4137	-15.3936			-24.0015	7.32507	-16.4431	-8.10445	-8.4293	-4.28606	11.6237	1.34207	-5.0091	-39.4853	12.6958	6.66981	-28.9757
2.392	35.422	-45.2738	-34.1938	-0.18578	-1.64651	6.10373	5.16019	16.7717	11.6266	-27.9768	-12.8471	10.4359	-15.068			-23.9812	7.28855	-16.4467	-8.03593	-8.46976	-4.17372	11.7088	1.24695	-5.00114	-39.52	12.5647	6.75468	-29.0128
2.394	35.3822	-45.3549	-34.4502	-0.201628	-1.67664	6.12626	5.1631	16.8414	11.6652	-28.039	-12.8695	10.4117	-14.882			-24.0885	7.27917	-16.4692	-7.96075	-8.53607	-4.09296	11.7679	1.13646	-5.04525	-39.5717	12.4181	6.8628	-28.9635
2.396	35.34	-45.5043	-34.7416	-0.178402	-1.71457	6.10918	5.1715	16.8444	11.7081	-28.111	-12.8475	10.3787	-14.8793			-24.3671	7.26306	-16.4365	-7.94716	-8.62058	-4.04928	11.778	1.05655	-5.06611	-39.6214	12.2818	6.89812	-28.9105
2.398	35.276	-45.6941	-35.0184	-0.159152	-1.74259	6.08625	5.18497	16.8447	11.736	-28.167	-12.8437	10.2672	-15.0003			-24.6207	7.23054	-16.3558	-8.01284	-8.67866	-4.07018	11.7272	0.97538	-5.09036	-39.6528	12.1727	6.87424	-28.8808
2.4	35.3098	-45.8029	-35.1	-0.13776	-1.77478	6.09461	5.1738	16.8907	11.7786	-28.1903	-12.86	10.148	-15.1809			-24.8296	7.10655	-16.3756	-8.11259	-8.75797	-4.13169	11.6255	0.93933	-5.11087	-39.6913	12.077	6.81099	-28.923
2.402	35.4356	-45.8992	-34.9668	-0.115654	-1.83323	6.08551	5.14426	16.8155	11.8045	-28.1601	-12.8899	10.033	-15.3721			-24.8559	6.88554	-16.5131	-8.29076	-8.80246	-4.21782	11.5131	0.937076	-5.15645	-39.7732	11.9936	6.7312	-29.0882
2.404	35.5103	-45.9706	-34.7027	-0.062384	-1.87412	6.08993	5.12093	16.7346	11.8038	-28.1257	-12.9321	10.2534	-15.4925			-24.8017	6.67671	-16.6866	-8.43168	-8.81142	-4.34143	11.4516	0.87444	-5.20978	-39.8525	11.9062	6.46699	-29.1323
2.406	35.5351	-45.9987	-34.4253	-0.029904	-1.88968	6.12464	5.11984	16.632	11.8781	-28.1132	-12.9743	10.4001	-15.4763			-24.6478	6.53327	-16.7704	-8.552	-8.8291	-4.45862	11.4149	0.816718	-5.25664	-39.9748	11.9192	6.21912	-29.1538
2.408	35.6158	-46.0404	-34.2881	0.054208	-1.84822	6.15217	5.13286	16.4949	11.9108	-28.0805	-13.0288	10.4933	-15.4004			-24.54	6.44094	-16.9337	-8.69742	-8.81462	-4.5583	11.4338	0.684026	-5.2863	-40.0025	12.0947	6.08714	-29.2271
2.41	35.806	-46.1123	-34.2146	0.091434	-1.84548	6.18643	5.13617	16.4053	11.9607	-28.0909	-13.0437	10.6073	-15.2883			-24.3901	6.37792	-17.0835	-8.81048	-8.7325	-4.60205	11.4728	0.598472	-5.34745	-39.9535	12.2966	5.91101	-29.2792
2.412	36.0604	-46.1961	-34.2112	0.099162	-1.81489	6.20977	5.13292	16.3219	11.9929	-28.1504	-13.014	10.7367	-15.2165			-24.2329	6.38863	-17.1329	-8.9041	-8.71205	-4.58088	11.5433	0.568764	-5.40572	-39.8768	12.515	5.76645	-29.2087
2.414	36.2645	-46.2222	-34.4004	0.10164	-1.84734	6.23487	5.11144	16.2341	12.0663	-28.2278	-12.9346	10.7474	-15.2388			-24.1351	6.55665	-17.0988	-8.95458	-8.69571	-4.5088	11.6531	0.582232	-5.4762	-39.8212	12.6156	5.63182	-29.0678
2.416	36.3691	-46.1984	-34.7079	0.153342	-1.85962	6.24968	5.09093	16.1578	12.1086	-28.3036	-12.9244	10.8711	-15.2587			-24.083	6.77116	-16.8583	-8.99315	-8.60782	-4.40994	11.749	0.571774	-5.51471	-39.8114	12.6931	5.39818	-28.8499
2.418	36.4599	-46.1721	-35.0274	0.226702	-1.88021	6.24417	5.08976	16.2357	12.1721	-28.3701	-12.9904	10.8122	-15.2931			-23.9675	6.97003	-16.6511	-8.98164	-8.54697	-4.35998	11.8196	0.701274	-5.58139	-39.7979	12.7059	5.26758	-28.6898
2.42	36.5109	-46.1422	-35.1684	0.289436	-1.86094	6.17196	5.08032	16.3523	12.2126	-28.3583	-13.0437	10.8042	-15.2685			-23.8857	7.03102	-16.4978	-8.93738	-8.5783	-4.34634	11.8973	0.739718	-5.64007	-39.7483	12.605	5.18496	-28.5753
2.422	36.4806	-46.0715	-35.1341	0.273182	-1.85352	6.14345	5.09137	16.4984	12.2748	-28.2953	-12.9968	10.7795	-15.2702			-23.8212	7.01218	-16.4279	-8.87201	-8.61259	-4.37609	11.9314	0.670768	-5.72841	-39.7887	12.5394	5.2925	-28.407
2.424	36.469	-45.8895	-35.0058	0.263354	-1.83548	6.1385	5.09467	16.5973	12.3537	-28.2776	-12.914	10.72	-15.1852			-23.8404	7.03242	-16.4604	-8.77978	-8.65238	-4.43289	11.8783	0.544684	-5.78726	-39.8819	12.4406	5.4896	-28.1866
2.426	36.4134	-45.8023	-34.9199	0.26677	-1.81707	6.18278	5.10091	16.7113	12.3857	-28.2254	-12.8485	10.6632	-15.0861			-23.94	7.12653	-16.6296	-8.65572	-8.73432	-4.52627	11.7329	0.409836	-5.85124	-39.9338	12.34	5.69317	-28.0404
2.428	36.3419	-45.8288	-34.9384	0.27559	-1.79988	6.25555	5.06678	16.8054	12.4319	-28.1752	-12.7503	10.5776	-14.9483			-24.1378	7.22179	-16.9443	-8.54004	-8.77173	-4.63053	11.6235	0.30632	-5.92309	-39.9384	12.2641	5.91615	-27.9332
2.43	36.2492	-45.8708	-34.9193	0.284382	-1.78119	6.3097	5.02291	16.8928	12.5046	-28.1223	-12.642	10.5478	-14.8545			-24.3614	7.19873	-17.3076	-8.46163	-8.87389	-4.71429	11.543	0.185304	-5.99575	-39.9303	12.1509	6.05881	-27.8404
2.432	36.1695	-45.8778	-34.8667	0.28777	-1.72509	6.33814	4.99352	16.9591	12.5331	-28.0958	-12.539	10.4344	-14.7863			-24.5876	7.06745	-17.7008	-8.36742	-8.98107	-4.79702	11.5265	0.059108	-6.04642	-39.9653	12.0753	6.24861	-27.755
2.434	36.1323	-45.8612	-34.8701	0.310758	-1.61497	6.36769	5.00828	17.0186	12.5426	-28.134	-12.4042	10.3436	-14.801			-24.6817	6.90081	-18.0513	-8.31258	-9.05318	-4.886	11.5356	-0.099022	-6.09942	-39.9813	12.0033	6.37854	-27.6474
2.436	36.1076	-45.8956	-34.9023	0.320852	-1.53769	6.38354	5.01588	17.1043	12.5929	-28.2108	-12.2736	10.2432	-14.9492			-24.6403	6.79223	-18.3941	-8.25807	-9.07242	-4.93202	11.5697	-0.173446	-6.1528	-40.0018	11.9116	6.43621	-27.7368
2.438	36.1433	-45.9249	-34.9304	0.342132	-1.50265	6.40683	5.00987	17.1643	12.6703	-28.2973	-12.1741	10.2239	-15.1939			-24.577	6.71486	-18.6519	-8.22333	-9.05617	-4.95744	11.635	-0.30254	-6.23631	-40.0228	11.8224	6.40357	-27.8781
2.44	36.2948	-45.9169	-34.8059	0.40187	-1.46859	6.40072	4.98316	17.0699	12.7182	-28.3559	-12.034	10.1709	-15.5097			-24.4668	6.60037	-18.6318	-8.26966	-9.05429	-4.93672	11.7335	-0.278432	-6.31457	-40.0108	11.7007	6.42208	-27.9673
2.442	36.4751	-45.9091	-34.5214	0.422786	-1.47468	6.38077	4.98266	16.8666	12.7735	-28.3918	-11.913	10.2081	-15.696			-24.3011	6.48967	-18.4798	-8.30105	-9.07663	-4.90813	11.8284	-0.155946	-6.38732	-39.9642	11.6149	6.28522	-27.9591
2.444	36.7006	-45.8274	-34.2066	0.44254	-1.51049	6.37407	4.97647	16.5279	12.8202	-28.4549	-11.8403	10.2123	-15.7994			-24.1924	6.45655	-18.3433	-8.37754	-9.09436	-4.86326	11.8984	-0.01806	-6.47559	-39.9806	11.6232	6.25419	-27.8998
2.446	36.8739	-45.7489	-34.0572	0.513268	-1.60983	6.33612	4.97319	16.1894	12.8926	-28.5296	-11.7727	10.2625	-15.795			-24.1103	6.53451	-18.4144	-8.50479	-9.14057	-4.76613	11.9642	0.068348	-6.55031	-39.9841	11.6798	6.19451	-27.8996
2.448	37.0313	-45.7685	-34.0778	0.577514	-1.65423	6.29166	4.99384	16.0703	13.0018	-28.5592	-11.7022	10.312	-15.6729			-23.9822	6.61387	-18.5558	-8.66369	-9.22795	-4.69028	11.9914	0.034398	-6.61233	-40.01	11.6887	6.13292	-27.9475
2.45	37.1314	-45.8651	-34.2107	0.644322	-1.72311	6.26972	4.98483	16.0963	13.0437	-28.5121	-11.6574	10.3769	-15.5635			-23.8043	6.72752	-18.7678	-8.82165	-9.26524	-4.65863	11.9288	0.045402	-6.64959	-40.0429	11.7309	6.06795	-27.8485
2.452	37.2182	-45.9868	-34.4685	0.695324	-1.77062	6.24568	4.98701	16.239	13.0929	-28.4532	-11.6504	10.4249	-15.4108			-23.6686	6.646	-19.0459	-9.01373	-9.26856	-4.62846	11.7784	0.021518	-6.55509	-40.0926	11.7749	5.97411	-27.6531
2.454	37.2588	-46.1582	-34.7222	0.693686	-1.80382	6.261	4.98536	16.3324	13.1294	-28.3769	-11.7187	10.525	-15.173			-23.5426	6.47573	-19.2872	-9.16161	-9.30307	-4.62846	11.6522	-0.11354	-6.49636	-40.1283	11.7724	5.87628	-27.4961
2.456	37.251	-46.2964	-34.8638	0.718214	-1.76464	6.27466	4.96131	16.5278	13.1468	-28.2854	-11.7817	10.604	-14.9246			-23.5071	6.43181	-19.5214	-9.23703	-9.30552	-4.64818	11.5439	-0.294798	-6.42811	-40.1236	11.6947	5.7954	-27.3718
2.458	37.1745	-46.4369	-34.9318	0.709856	-1.6806	6.2995	4.94122	16.6308	13.1704	-28.2424	-11.7505	10.6712	-14.8431			-23.4982	6.39402	-19.6763	-9.27542	-9.34259	-4.66284	11.5027	-0.45815	-6.36125	-40.1339	11.5779	5.72573	-27.399
2.46	37.0934	-46.5354	-34.7675	0.731136	-1.56208	6.34302	4.95426	16.7795	13.1219	-28.2251	-11.6968	10.7187	-14.8791			-23.5479	6.33797	-19.8049	-9.30563	-9.32254	-4.71059	11.5148	-0.63651	-6.39803	-40.1911	11.4095	5.63387	-27.424
2.462	37.0691	-46.4739	-34.4105	0.812854	-1.46007	6.401	4.95419	16.8787	13.045	-28.2177	-11.6645	10.7683	-15.0614			-23.6298	6.2677	-19.736	-9.31816	-9.32763	-4.75703	11.5552	-0.78155	-6.50077	-40.2294	11.258	5.56574	-27.5109
2.464	37.0592	-46.4139	-34.0004	0.84441	-1.41949	6.44279	4.94789	16.9739	12.9532	-28.241	-11.6411	10.8568	-15.285			-23.6645	6.31019	-19.7479	-9.19062	-9.34401	-4.80243	11.6078	-0.951888	-6.61532	-40.2331	11.1373	5.44796	-27.6122
2.466	37.0789	-46.3178	-33.8386	0.88725	-1.45408	6.49116	4.93041	17.0842	12.8372	-28.2887	-11.6207	10.9269	-15.3383			-23.694	6.43443	-19.8563	-8.97548	-9.3907	-4.84576	11.6831	-1.11555	-6.67425	-40.2256	11.0072	5.36606	-27.6739
2.468	37.0605	-46.1273	-33.845	0.906234	-1.48435	6.52719	4.9048	17.2229	12.7468	-28.3649	-11.595	11.0459	-15.2999			-23.7091	6.65272	-19.9837	-8.7983	-9.41881	-4.90676	11.7816	-1.30011	-6.74008	-40.2292	10.8907	5.2142	-27.782
2.47	36.9862	-46.0033	-34.0283	0.843402	-1.53448	6.52882	4.87421	17.3761	12.6902	-28.4263	-11.5664	11.0899	-15.2101			-23.6777	6.87032	-20.1027	-8.61757	-9.47656	-4.97888	11.8926	-1.52989	-6.78317	-40.2539	10.7307	5.10931	-27.9321
2.472	36.9184	-45.8277	-34.3373	0.776804	-1.6017	6.50376	4.86055	17.4885	12.6567	-28.5073	-11.637	11.1522	-15.1205			-23.6272	7.02449	-20.2015	-8.50492	-9.54838	-5.05158	11.9833	-1.73156	-6.88611	-40.2516	10.696	5.02999	-28.0479
2.474	36.8778	-45.6782	-34.5762	0.750778	-1.63216	6.48717	4.86914	17.5936	12.5857	-28.608	-11.7076	11.2244	-15.0706			-23.554	7.05774	-20.2413	-8.42548	-9.62681	-5.09842	12.0318	-1.8541	-6.95414	-40.2908	10.7492	4.94747	-27.9612
2.476	36.8607	-45.6531	-34.5756	0.765072	-1.6931	6.45371	4.89894	17.5986	12.6163	-28.6924	-11.7612	11.2812	-15.0395			-23.5568	7.10835	-20.3644	-8.40897	-9.6815	-5.13443	12.0495	-1.98572	-6.96076	-40.3198	10.8562	4.80446	-27.791
2.478	36.8322	-45.611	-34.4065	0.726698	-1.76203	6.44455	4.9201	17.5958	12.718	-28.7565	-11.7422	11.3672	-15.0385			-23.5398	7.20019	-20.592	-8.42904	-9.71764	-5.16786	12.0207	-1.9692	-6.92238	-40.3611	10.9904	4.70284	-27.6086
2.48	36.8412	-45.5807	-34.2063	0.756434	-1.77351	6.46345	4.89838	17.5365	12.8501	-28.7272	-11.7371	11.4498	-15.0611			-23.5654	7.30586	-20.8652	-8.47742	-9.76042	-5.15789	11.9262	-1.8951	-6.81999	-40.4096	11.0929	4.57188	-27.4901
2.482	36.8777	-45.5201	-33.9251	0.781522	-1.78338	6.5177	4.86665	17.5017	12.9321	-28.6608	-11.7667	11.4592	-15.0603			-23.556	7.29473	-21.1265	-8.57146	-9.71174	-5.12651	11.8177	-1.81569	-6.7117	-40.4495	11.2208	4.53125	-27.3874
2.484	36.9291	-45.4956	-33.8245	0.829318	-1.74623	6.58917	4.849	17.4548	13.0322	-28.582	-11.8927	11.5717	-15.1419			-23.5353	7.17898	-21.3674	-8.66629	-9.69465	-5.11265	11.758	-1.77379	-6.64619	-40.4593	11.3006	4.39621	-27.305
2.486	37.0324	-45.4549	-33.7881	0.8764	-1.69614	6.68156	4.85418	17.4587	13.0762	-28.4611	-11.9333	11.6518	-15.1925			-23.5029	7.17889	-21.4944	-8.77589	-9.68232	-5.07258	11.7504	-1.65236	-6.57894	-40.42	11.2394	4.26684	-27.191
2.488	37.1573	-45.4558	-33.8697	0.99295	-1.62162	6.75802	4.8448	17.4568	13.1027	-28.3928	-11.9156	11.6496	-15.2041			-23.4809	7.16829	-21.5277	-8.87663	-9.66909	-5.06499	11.7882	-1.46803	-6.56208	-40.415	11.1763	4.25963	-27.0733
2.49	37.3116	-45.487	-34.0921	1.00863	-1.57086	6.79083	4.83326	17.5468	13.0327	-28.367	-11.8683	11.7403	-15.1117			-23.3601	7.16015	-21.5024	-8.9973	-9.66501	-5.08108	11.8159	-1.28041	-6.55301	-40.3772	11.1109	4.13469	-26.9501
2.492	37.5245	-45.5142	-34.3946	1.03531	-1.54241	6.73191	4.79982	17.5959	12.9953	-28.3682	-11.8389	11.7694	-14.9802			-23.1534	7.07678	-21.4133	-9.10811	-9.68036	-5.12207	11.8551	-1.19941	-6.58802	-40.3688	10.9661	4.07861	-26.8462
2.494	37.7534	-45.541	-34.5851	1.02021	-1.56243	6.63414	4.78988	17.6124	12.9676	-28.3722	-11.7874	11.8976	-14.8244			-22.8799	6.88129	-21.3814	-9.11691	-9.72971	-5.18133	11.9085	-1.17414	-6.65372	-40.4201	10.8912	3.91342	-26.8349
2.496	37.8916	-45.6257	-34.4879	1.01108	-1.62966	6.57804	4.7497	17.6014	12.9691	-28.3758	-11.7451	11.9695	-14.7005			-22.7083	6.68457	-21.557	-9.1062	-9.78041	-5.25927	12.0027	-1.24162	-6.75916	-40.4758	10.7151	3.84643	-26.8116
2.498	37.9585	-45.7543	-34.2575	1.01214	-1.74035	6.51756	4.73323	17.5768	12.9775	-28.4047	-11.6774	12.0575	-14.5801			-22.6586	6.53296	-21.7977	-9.01811	-9.81278	-5.31304	12.0988	-1.31722	-6.85164	-40.5155	10.5542	3.70131	-26.702
2.5	37.9831	-45.7939	-34.0564	1.02943	-1.82434	6.49613	4.72832	17.6035	13.0077	-28.4791	-11.5505	12.1343	-14.5649			-22.7035	6.46633	-22.1143	-8.9279	-9.85715	-5.37828	12.1794	-1.43129	-6.98433	-40.5387	10.419	3.61845	-26.6849
2.502	37.9611	-45.8591	-33.914	1.08203	-1.90165	6.53167	4.73596	17.5899	13.0271	-28.5555	-11.4125	12.2488	-14.6311			-22.7687	6.33307	-22.4606	-8.81902	-9.8834	-5.38367	12.2316	-1.59002	-7.09478	-40.5532	10.4303	3.56993	-26.6615
2.504	37.9462	-45.9497	-33.8264	1.12109	-1.89801	6.58553	4.75518	17.5884	13.0945	-28.6295	-11.301	12.3605	-14.7258			-22.8468	6.09904	-22.6797	-8.72259	-9.8575	-5.33953	12.2054	-1.68673	-7.13166	-40.5695	10.4597	3.59117	-26.7134
2.506	37.8912	-46.0959	-33.804	1.16264	-1.82529	6.63915	4.75549	17.5376	13.1197	-28.7105	-11.2123	12.4352	-14.8011			-22.9612	5.91765	-22.7241	-8.61816	-9.8579	-5.26863	12.11	-1.76918	-7.24044	-40.5851	10.4954	3.7001	-26.6707
2.508	37.8089	-46.265	-33.8755	1.17908	-1.74593	6.7181	4.73707	17.5253	13.1609	-28.7409	-11.1869	12.5056	-14.8843			-23.009	5.88286	-22.6499	-8.46798	-9.86334	-5.23785	11.9447	-1.84097	-7.32063	-40.5809	10.5456	3.80026	-26.5577
2.51	37.6634	-46.4178	-33.9926	1.19055	-1.5972	6.78436	4.7139	17.4674	13.2003	-28.7617	-11.2445	12.4502	-14.9834			-23.0776	5.92162	-22.4875	-8.32314	-9.83991	-5.243	11.8009	-1.89315	-7.38174	-40.6276	10.6154	3.9117	-26.4069
2.512	37.5542	-46.5084	-34.1591	1.1527	-1.54518	6.78402	4.71192	17.4	13.2178	-28.7314	-11.2991	12.3171	-15.1652			-23.1442	5.98287	-22.2392	-8.19533	-9.86577	-5.27009	11.7207	-1.87085	-7.46103	-40.6623	10.6226	3.9282	-26.297
2.514	37.4728	-46.5406	-34.2607	1.10741	-1.51423	6.73336	4.73263	17.3878	13.2299	-28.6532	-11.355	12.0474	-15.3273			-23.2511	6.01861	-21.9407	-8.1354	-9.88341	-5.30713	11.6995	-1.81933	-7.54372	-40.6869	10.5835	3.84791	-26.1804
2.516	37.4334	-46.4494	-34.3514	1.09316	-1.53154	6.63653	4.74575	17.3456	13.2658	-28.5565	-11.3873	11.8817	-15.4406			-23.3675	6.0243	-21.7544	-8.14993	-9.90125	-5.38602	11.7333	-1.78835	-7.65206	-40.6727	10.5114	3.77077	-26.1762
2.518	37.4111	-46.3139	-34.424	1.08604	-1.58943	6.55166	4.73096	17.3504	13.3197	-28.5073	-11.3675	11.8575	-15.5094			-23.498	6.1266	-21.6489	-8.20107	-9.92368	-5.45968	11.8139	-1.72901	-7.74999	-40.6623	10.4196	3.57676	-26.1838
2.52	37.4496	-46.2037	-34.4722	1.0801	-1.67394	6.51032	4.70774	17.3878	13.3617	-28.4834	-11.3475	11.8159	-15.478			-23.5215	6.21456	-21.6198	-8.32321	-9.9916	-5.52927	11.9114	-1.59009	-7.82568	-40.6444	10.3605	3.48902	-26.2342
2.522	37.4901	-46.1145	-34.4207	1.1557	-1.76357	6.48705	4.66549	17.4869	13.4118	-28.4956	-11.3437	11.7691	-15.3469			-23.4925	6.18143	-21.7781	-8.46605	-10.0318	-5.59776	11.9648	-1.4132	-7.92606	-40.6179	10.2516	3.48285	-26.2972
2.524	37.6134	-46.2139	-34.3485	1.12725	-1.82255	6.50563	4.60814	17.572	13.4781	-28.5043	-11.3129	11.7165	-15.0498			-23.3581	6.04457	-21.9755	-8.64581	-10.0543	-5.64222	12.0541	-1.33298	-8.00533	-40.6439	10.1531	3.48494	-26.3749
2.526	37.7344	-46.4542	-34.2992	1.18875	-1.9124	6.56718	4.54485	17.6528	13.5125	-28.5096	-11.2765	11.7911	-14.6887			-23.2183	5.85998	-22.1992	-8.85335	-10.0749	-5.59474	12.1262	-1.27091	-8.07212	-40.6835	10.0469	3.64182	-26.4969
2.528	37.9088	-46.6871	-34.3941	1.18703	-1.95525	6.64703	4.50184	17.7336	13.5636	-28.5255	-11.2648	11.9071	-14.4622			-23.0799	5.83569	-22.3919	-9.01699	-10.0876	-5.53536	12.1883	-1.19941	-8.17468	-40.7356	9.92447	3.91374	-26.4756
2.53	38.1176	-46.8331	-34.4983	1.16383	-1.9655	6.72363	4.47457	17.7472	13.6341	-28.5463	-11.2703	12.0632	-14.3202			-22.9867	5.94184	-22.538	-9.16229	-10.1286	-5.48828	12.2005	-1.21717	-8.28855	-40.8021	9.80231	4.13668	-26.4317
2.532	38.2766	-46.962	-34.5232	1.09459	-1.96315	6.75756	4.47196	17.8201	13.6944	-28.5465	-11.2504	12.1946	-14.3837			-22.9258	5.97831	-22.5972	-9.22274	-10.0927	-5.47092	12.189	-1.21443	-8.39021	-40.8421	9.64398	4.23062	-26.429
2.534	38.4114	-46.9865	-34.4456	1.04171	-1.90054	6.72227	4.48932	17.772	13.817	-28.5501	-11.214	12.3017	-14.5613			-22.8769	5.83664	-22.6361	-9.258	-10.0395	-5.46386	12.157	-1.27849	-8.52741	-40.8593	9.47659	4.24556	-26.4883
2.536	38.5185	-46.9779	-34.2675	1.01893	-1.81877	6.6852	4.49749	17.7865	13.89	-28.6086	-11.1789	12.1835	-14.8031			-22.8444	5.61418	-22.5921	-9.23622	-10.0146	-5.48288	12.1345	-1.36552	-8.51599	-40.8972	9.28766	4.25984	-26.4878
2.538	38.4402	-47.0766	-34.0267	1.06154	-1.77261	6.643	4.53895	17.8285	13.8612	-28.6905	-11.1604	12.0999	-14.9671			-22.8109	5.35056	-22.5412	-9.18277	-9.98273	-5.52798	12.122	-1.47118	-8.43933	-40.9428	9.16142	4.22103	-26.3986
2.54	38.1317	-47.2431	-33.8011	1.12	-1.75736	6.58277	4.61775	17.843	13.8545	-28.7802	-11.091	12.0023	-15.1286			-22.8121	5.08316	-22.4925	-9.05479	-9.99034	-5.59412	12.1209	-1.58344	-8.38054	-41.0083	9.03755	4.13001	-26.3366
2.542	37.8104	-47.4589	-33.528	1.17239	-1.78058	6.50762	4.6671	17.9216	13.7817	-28.8809	-11.0236	12.0292	-15.1611			-22.7673	4.78288	-22.6227	-8.90401	-10.0236	-5.6953	12.1408	-1.70779	-8.27494	-41.0793	8.9857	3.92444	-26.3408
2.544	37.6432	-47.7276	-33.3853	1.22902	-1.8101	6.46769	4.70894	17.9913	13.6748	-28.9091	-10.9483	12.0836	-15.1024			-22.6605	4.37923	-22.7606	-8.76999	-10.0674	-5.81006	12.1215	-1.81122	-8.2032	-41.0934	8.9984	3.74801	-26.3698
2.546	37.6098	-48.0306	-33.4051	1.22945	-1.80716	6.44679	4.7123	18.017	13.5192	-28.9438	-10.8908	12.2229	-15.0206			-22.4802	3.86742	-22.8158	-8.66286	-10.1298	-5.89205	12.0741	-1.92947	-8.21486	-41.1817	9.02912	3.51168	-26.397
2.548	37.648	-48.3409	-33.6026	1.17911	-1.86029	6.43434	4.70235	18.1174	13.3832	-28.9821	-10.8325	12.3245	-14.9552			-22.3936	3.44352	-22.8251	-8.53999	-10.1945	-5.94017	12.0492	-2.0809	-8.21339	-41.2679	9.06791	3.33092	-26.301
2.55	37.6957	-48.5353	-33.8858	1.14787	-1.93402	6.48834	4.67986	18.1807	13.3311	-28.9944	-10.8263	12.4202	-14.7844			-22.3968	3.27236	-22.6905	-8.49279	-10.2722	-5.92707	12.0556	-2.31378	-8.22732	-41.2983	9.16268	3.14356	-26.1605
2.552	37.7455	-48.5843	-34.205	1.16577	-1.98582	6.55829	4.64621	18.1958	13.306	-28.9368	-10.874	12.5178	-14.5858			-22.5762	3.28026	-22.4457	-8.5	-10.3052	-5.86435	12.0686	-2.45902	-8.18639	-41.306	9.25063	2.98498	-25.9971
2.554	37.8031	-48.5131	-34.3298	1.17305	-2.09768	6.61765	4.5788	18.1268	13.3107	-28.9006	-10.961	12.5589	-14.3882			-22.8773	3.33549	-22.2505	-8.58511	-10.3579	-5.81855	12.0679	-2.61828	-8.18187	-41.3041	9.22494	2.85404	-25.9014
2.556	37.8837	-48.4394	-34.325	1.16071	-2.11431	6.65091	4.52059	18.0784	13.3623	-28.8818	-11.0265	12.6046	-14.2443			-23.1353	3.39553	-22.2113	-8.73776	-10.352	-5.80294	12.0614	-2.65674	-8.15871	-41.3091	9.10696	2.77281	-25.8506
2.558	37.9609	-48.2931	-34.1828	1.10208	-2.09665	6.60842	4.4711	18.0084	13.3853	-28.8878	-11.1059	12.6451	-14.2176			-23.2204	3.47998	-22.2162	-8.89857	-10.361	-5.76346	12.0393	-2.68877	-8.14947	-41.313	9.00376	2.62615	-25.8232
2.56	37.9475	-48.2373	-34.0548	1.069	-2.04669	6.54935	4.44567	17.9572	13.4351	-28.8786	-11.1486	12.7108	-14.3038			-23.2184	3.6828	-22.3341	-9.04694	-10.3188	-5.76248	12.0091	-2.74464	-8.18503	-41.272	8.84107	2.52318	-25.8194
2.562	37.8274	-48.1954	-33.9206	1.06784	-2.02115	6.50985	4.42898	17.933	13.489	-28.8936	-11.1605	12.8098	-14.5264			-23.1943	3.82595	-22.574	-9.20807	-10.3367	-5.81479	11.9925	-2.69583	-8.21997	-41.2695	8.71527	2.33062	-25.8409
2.564	37.7912	-48.3149	-33.6979	1.07999	-2.02157	6.46852	4.41132	17.9101	13.538	-28.9223	-11.187	12.8458	-14.7417			-23.1103	3.66383	-22.8403	-9.35263	-10.26	-5.89232	11.9867	-2.64299	-8.30133	-41.2793	8.55604	2.25439	-25.8686
2.566	37.7305	-48.5741	-33.4961	1.14817	-1.95941	6.46496	4.42071	17.9525	13.5849	-28.9527	-11.2098	12.9607	-14.8894			-23.0213	3.23744	-23.1181	-9.46333	-10.187	-6.00797	11.9927	-2.47075	-8.37379	-41.284	8.38029	2.12929	-25.8144
2.568	37.741	-48.8777	-33.4735	1.19928	-1.96903	6.47262	4.49071	17.9455	13.6334	-28.9511	-11.2314	13.0931	-15.0447			-22.8267	2.74771	-23.187	-9.56129	-10.1564	-6.12844	12.0353	-2.264	-8.41443	-41.2923	8.17363	2.05582	-25.7845
2.57	37.7486	-49.1945	-33.4868	1.21164	-1.96895	6.4412	4.52228	18.0018	13.6684	-28.9507	-11.2596	13.2347	-15.0591			-22.631	2.33484	-23.209	-9.6364	-10.1662	-6.20325	12.1012	-2.03157	-8.48187	-41.2871	8.01014	1.97631	-25.7842
2.572	37.716	-49.5062	-33.6605	1.30806	-1.99791	6.41911	4.53981	18.0758	13.7298	-28.9404	-11.2125	13.3128	-15.0026			-22.505	1.98898	-23.0796	-9.61912	-10.2024	-6.2951	12.155	-1.92452	-8.54291	-41.2885	7.92145	2.04765	-25.7747
2.574	37.6848	-49.7954	-33.8524	1.39056	-2.04156	6.4006	4.52444	18.16	13.7825	-28.9292	-11.1777	13.3444	-14.9082			-22.4172	1.62315	-22.9849	-9.53257	-10.2349	-6.37283	12.1733	-1.90232	-8.57625	-41.2805	7.92259	2.12531	-25.6969
2.576	37.6827	-49.8945	-34.0193	1.46374	-2.06476	6.37886	4.50423	18.2534	13.8212	-28.9137	-11.0997	13.3413	-14.7885			-22.3334	1.43955	-22.8123	-9.41693	-10.2671	-6.41057	12.134	-1.87282	-8.65015	-41.2714	7.92809	2.19671	-25.5326
2.578	37.6918	-49.7952	-34.0824	1.50305	-2.08813	6.37399	4.47076	18.2613	13.8726	-28.9051	-11.0175	13.289	-14.5628			-22.3583	1.39832	-22.6197	-9.30121	-10.3479	-6.39066	12.1225	-1.89426	-8.7362	-41.2781	7.9155	2.2618	-25.3932
2.58	37.7384	-49.6254	-34.0068	1.53917	-2.08198	6.37671	4.43976	18.3454	13.9241	-28.9145	-10.9723	13.1939	-14.3162			-22.4365	1.59393	-22.5955	-9.15053	-10.4343	-6.3639	12.1065	-1.81639	-8.78559	-41.291	7.96762	2.2169	-25.325
2.582	37.794	-49.4814	-33.8855	1.57151	-2.02702	6.4126	4.37388	18.3414	14.0172	-28.9	-10.9688	12.9674	-14.1115			-22.6328	1.8433	-22.6746	-9.04214	-10.5358	-6.29759	12.0994	-1.85688	-8.86547	-41.29	8.04041	2.04621	-25.3195
2.584	37.8721	-49.4336	-33.7342	1.58766	-1.93186	6.47476	4.31782	18.3208	14.052	-28.8919	-11.0112	12.8495	-14.0025			-22.7278	2.04477	-22.8307	-8.96585	-10.5547	-6.23743	12.0667	-1.83578	-8.96192	-41.274	8.11493	1.80069	-25.2454
2.586	37.8683	-49.4019	-33.611	1.60576	-1.86172	6.48719	4.26924	18.3241	14.1217	-28.9071	-11.1252	12.7171	-14.0904			-22.7865	2.08088	-22.9388	-8.97103	-10.5929	-6.14291	12.0429	-2.00621	-9.02612	-41.2856	8.08073	1.74608	-25.2354
2.588	37.8355	-49.4273	-33.6515	1.56972	-1.83186	6.46485	4.23557	18.356	14.1891	-28.9235	-11.2602	12.6904	-14.3204			-22.7868	1.88545	-23.0923	-9.04856	-10.5936	-6.10292	12.0127	-2.10911	-9.1244	-41.3065	8.06137	1.60643	-25.3338
2.59	37.7812	-49.5977	-33.7329	1.54344	-1.8675	6.4398	4.23279	18.407	14.2428	-28.9162	-11.3461	12.6936	-14.5223			-22.7934	1.56786	-23.2769	-9.15187	-10.5942	-6.07508	11.9963	-2.24367	-9.19569	-41.3103	8.01109	1.57535	-25.4676
2.592	37.7721	-49.9289	-33.7951	1.51425	-1.97004	6.42571	4.23646	18.4831	14.2867	-28.9144	-11.443	12.7036	-14.6586			-22.7156	1.16638	-23.4535	-9.2826	-10.6075	-6.04248	11.9913	-2.43473	-9.24519	-41.3269	7.91882	1.58739	-25.522
2.594	37.8405	-50.2296	-33.7984	1.452	-2.06116	6.41014	4.26026	18.5531	14.3345	-28.8981	-11.5139	12.7599	-14.7187			-22.6098	0.63	-23.5271	-9.38388	-10.5903	-6.0678	12.0068	-2.65467	-9.33776	-41.3107	7.83108	1.64104	-25.4589
2.596	37.9206	-50.5406	-33.7161	1.4201	-2.15023	6.4202	4.29953	18.5842	14.406	-28.91	-11.6416	12.9059	-14.6817			-22.4663	-0.024122	-23.4138	-9.52315	-10.5784	-6.10945	12.0474	-2.76625	-9.44406	-41.338	7.67876	1.75687	-25.5277
2.598	38.0192	-50.7637	-33.6156	1.37613	-2.20843	6.41819	4.31784	18.565	14.4469	-28.9093	-11.7479	12.9867	-14.5827			-22.2922	-0.56028	-23.2059	-9.61222	-10.5765	-6.15829	12.1076	-2.94126	-9.51986	-41.3486	7.52017	1.94852	-25.5861
2.6	38.1475	-50.8664	-33.3995	1.3691	-2.28193	6.39211	4.3351	18.4871	14.5377	-28.88	-11.7893	13.1104	-14.47			-22.1333	-0.762734	-23.0088	-9.64468	-10.5455	-6.19671	12.1732	-3.09861	-9.59874	-41.3036	7.42438	2.11492	-25.672
2.602	38.3051	-50.8295	-33.1673	1.38187	-2.30664	6.3524	4.34708	18.4025	14.6265	-28.8513	-11.7363	13.2182	-14.4058			-21.935	-0.636356	-22.9797	-9.635	-10.5674	-6.23619	12.1874	-3.08015	-9.69255	-41.2647	7.38416	2.25434	-25.5936
2.604	38.527	-50.7271	-32.9254	1.42439	-2.30111	6.305	4.3643	18.3612	14.6734	-28.8331	-11.6561	13.3098	-14.4073			-21.7965	-0.38556	-22.9736	-9.59736	-10.6172	-6.30241	12.1473	-3.12675	-9.78134	-41.2206	7.43879	2.2806	-25.4513
2.606	38.729	-50.7026	-32.843	1.46328	-2.24966	6.24597	4.35042	18.3636	14.6903	-28.8409	-11.5456	13.2275	-14.4221			-21.6648	-0.28721	-22.9902	-9.50905	-10.6637	-6.35816	12.1217	-3.0781	-9.88645	-41.1925	7.49224	2.39711	-25.2346
2.608	38.8162	-50.7491	-32.9242	1.51064	-2.16219	6.20918	4.32562	18.4139	14.735	-28.8463	-11.4409	13.1353	-14.4488			-21.6909	-0.130914	-23.0771	-9.39449	-10.7041	-6.41204	12.0802	-2.91372	-10.0025	-41.1932	7.5763	2.37621	-25.0349
2.61	38.7853	-50.7291	-33.0803	1.48562	-2.05827	6.1803	4.28883	18.4794	14.7014	-28.8564	-11.3822	13.0604	-14.4181			-21.6961	0.107506	-23.0386	-9.28999	-10.7479	-6.43692	12.0531	-2.67582	-10.0844	-41.2323	7.72688	2.29674	-24.8253
2.612	38.7238	-50.6304	-33.3666	1.52236	-2.03129	6.21597	4.24064	18.5481	14.6188	-28.9053	-11.428	13.0372	-14.3951			-21.7636	0.32221	-22.9497	-9.18688	-10.7857	-6.43572	12.0145	-2.47584	-10.1178	-41.3156	7.82828	2.1145	-24.5455
2.614	38.6087	-50.5641	-33.6375	1.56831	-2.05723	6.28208	4.21071	18.687	14.5609	-28.9559	-11.4815	13.0456	-14.3356			-21.8254	0.26656	-22.8046	-9.10535	-10.8054	-6.43619	11.9563	-2.52414	-10.102	-41.399	7.81798	1.92083	-24.2763
2.616	38.5241	-50.6	-33.7498	1.5751	-2.0788	6.37573	4.21103	18.7427	14.522	-28.9687	-11.593	13.0546	-14.3259			-21.8475	-0.14154	-22.6657	-9.03245	-10.8435	-6.44825	11.913	-2.58259	-10.1533	-41.4435	7.76693	1.73232	-23.9777
2.618	38.3964	-50.6318	-33.7726	1.58052	-2.14816	6.45705	4.18277	18.8082	14.5134	-28.9679	-11.6322	13.1167	-14.2724			-21.7946	-0.617918	-22.5387	-9.03493	-10.8295	-6.4374	11.8807	-2.66181	-10.0976	-41.477	7.66538	1.49906	-23.7388
2.62	38.2576	-50.634	-33.7582	1.61624	-2.24605	6.49501	4.18347	18.8421	14.4649	-28.9932	-11.7208	13.1488	-14.1291			-21.8026	-1.01846	-22.4647	-9.06219	-10.856	-6.42305	11.8828	-2.83426	-9.95359	-41.5081	7.55882	1.31481	-23.4848
2.622	38.1647	-50.64	-33.689	1.60745	-2.33762	6.46013	4.19899	18.9686	14.5424	-29.0096	-11.8262	13.1957	-14.029			-21.8545	-1.25699	-22.4952	-9.16793	-10.877	-6.4293	11.9362	-3.0126	-9.80657	-41.535	7.45366	1.14901	-23.3869
2.624	38.1576	-50.6721	-33.6394	1.61687	-2.40334	6.43083	4.21285	19.048	14.6597	-29.0461	-11.9284	13.2025	-13.9587			-21.9379	-1.27233	-22.6064	-9.23618	-10.8429	-6.46409	12.0098	-3.17531	-9.71887	-41.5829	7.3605	0.99456	-23.4486
2.626	38.1838	-50.6655	-33.5639	1.56265	-2.47269	6.36891	4.198	19.1322	14.6955	-29.0371	-12.0303	13.2709	-13.9012			-21.9572	-1.18405	-22.7052	-9.3539	-10.8223	-6.52291	12.0672	-3.29115	-9.60742	-41.5966	7.2288	0.78309	-23.4878
2.628	38.2415	-50.7019	-33.4927	1.52306	-2.49382	6.30456	4.17838	19.1284	14.6891	-29.0542	-12.0096	13.308	-13.938			-21.955	-1.07573	-22.8115	-9.46155	-10.8122	-6.57275	12.0849	-3.48215	-9.5776	-41.6249	7.07332	0.620662	-23.5454
2.63	38.2992	-50.8502	-33.3631	1.45484	-2.48163	6.22545	4.17165	19.0618	14.6741	-29.0494	-11.9414	13.3512	-14.1101			-21.9148	-0.817754	-22.9063	-9.56802	-10.8141	-6.61447	12.0622	-3.60399	-9.57097	-41.6228	6.97326	0.456932	-23.6421
2.632	38.3464	-50.9369	-33.1763	1.41275	-2.43862	6.14543	4.15892	18.9349	14.6346	-29.0247	-11.8548	13.3995	-14.3425			-21.8814	-0.408702	-22.9939	-9.61377	-10.8738	-6.6463	12.022	-3.65242	-9.58422	-41.5929	6.89938	0.223062	-23.7275
2.634	38.3685	-50.9231	-32.9836	1.36886	-2.34641	6.11089	4.13266	18.846	14.6419	-28.9913	-11.7774	13.4583	-14.5268			-21.8311	-0.049952	-23.1604	-9.61817	-10.8975	-6.65377	11.9887	-3.64438	-9.68453	-41.5547	6.86797	0.001064	-23.7129
2.636	38.4415	-50.8583	-32.8881	1.39147	-2.28221	6.10989	4.06466	18.8183	14.6609	-28.9743	-11.7594	13.4713	-14.5856			-21.7817	-0.005852	-23.239	-9.58416	-10.9838	-6.65701	11.9639	-3.67983	-9.75811	-41.5251	6.96412	-0.147616	-23.6978
2.638	38.4705	-50.8728	-32.8779	1.42537	-2.23559	6.18552	3.97064	18.8343	14.7048	-28.9657	-11.8116	13.5264	-14.5161			-21.7584	-0.167594	-23.3284	-9.56431	-11.0375	-6.63655	11.9615	-3.64949	-9.86787	-41.5119	7.00979	-0.350406	-23.6774
2.64	38.5167	-50.8885	-32.9787	1.44805	-2.27833	6.27386	3.89564	18.8488	14.7401	-28.9383	-11.9456	13.5984	-14.4043			-21.7107	-0.32914	-23.2957	-9.55949	-11.0373	-6.63103	11.9484	-3.55278	-9.96642	-41.4944	6.98061	-0.505358	-23.7817
2.642	38.5518	-50.8405	-33.1285	1.44677	-2.36222	6.31533	3.83299	18.9673	14.7785	-28.9204	-12.0383	13.752	-14.267			-21.6683	-0.489482	-23.2701	-9.51013	-11.0893	-6.60953	11.9277	-3.39783	-10.0653	-41.4795	6.94625	-0.620116	-23.8309
2.644	38.5745	-50.8292	-33.2703	1.4952	-2.4402	6.29245	3.83348	19.1107	14.8461	-28.8947	-12.1598	13.8286	-14.1957			-21.6572	-0.594888	-23.2053	-9.41413	-11.1283	-6.57107	11.919	-3.28952	-10.1918	-41.4584	6.87491	-0.675374	-23.7179
2.646	38.637	-50.8929	-33.3945	1.48858	-2.53505	6.25052	3.87142	19.2587	14.9094	-28.8642	-12.2269	13.8827	-14.119			-21.619	-0.75656	-23.0766	-9.3547	-11.1289	-6.56646	11.8936	-3.31376	-10.2545	-41.4399	6.81491	-0.706118	-23.5521
2.648	38.6734	-51.0584	-33.4356	1.50238	-2.59745	6.23538	3.88506	19.4228	14.9527	-28.8638	-12.3188	13.9285	-14.0514			-21.5686	-1.03384	-23.038	-9.3035	-11.104	-6.56692	11.8907	-3.35726	-10.3243	-41.4406	6.73987	-0.724584	-23.3387
2.65	38.6987	-51.2383	-33.3697	1.52625	-2.6718	6.19394	3.93331	19.4871	14.9679	-28.8833	-12.4334	13.8868	-14.0078			-21.5389	-1.22767	-23.1109	-9.27919	-11.0793	-6.58764	11.8845	-3.37092	-10.414	-41.4701	6.65521	-0.707798	-23.1399
2.652	38.7552	-51.3505	-33.2971	1.55008	-2.7167	6.13315	3.97548	19.5069	15.0442	-28.8821	-12.5126	13.671	-13.9371			-21.5026	-1.22896	-23.1975	-9.25408	-11.0456	-6.65034	11.9233	-3.36256	-10.5024	-41.5099	6.57717	-0.617918	-22.877
2.654	38.7849	-51.352	-33.2476	1.57626	-2.69949	6.10603	4.01313	19.4796	15.1131	-28.8806	-12.5909	13.4167	-13.8994			-21.4979	-1.18446	-23.3264	-9.24941	-11.0296	-6.72195	11.9546	-3.3451	-10.5127	-41.546	6.50999	-0.564844	-22.6131
2.656	38.8313	-51.2773	-33.2618	1.60324	-2.6697	6.08643	4.06753	19.3995	15.1455	-28.8999	-12.6595	13.1638	-13.8287			-21.4616	-1.04598	-23.4144	-9.27364	-11.0848	-6.80991	11.944	-3.21391	-10.6329	-41.5748	6.4738	-0.512204	-22.3732
2.658	38.8498	-51.0816	-33.1639	1.56622	-2.56655	6.06427	4.09252	19.2893	15.2037	-28.9593	-12.7658	12.9879	-13.7601			-21.4302	-0.920276	-23.555	-9.305	-11.1342	-6.86172	11.9433	-3.31678	-10.7039	-41.6279	6.38911	-0.488628	-22.1407
2.66	38.891	-50.901	-33.1199	1.55246	-2.51129	6.02414	4.10267	19.1508	15.234	-28.9646	-12.8784	12.9282	-13.7103			-21.4028	-0.985922	-23.7184	-9.33698	-11.2113	-6.91655	11.9151	-3.46259	-10.7729	-41.6283	6.32705	-0.497798	-21.9018
2.662	38.9284	-50.7043	-33.0231	1.5328	-2.47418	5.97943	4.10514	19.027	15.304	-28.9405	-12.9979	12.9442	-13.793			-21.371	-1.15886	-23.8989	-9.3214	-11.2694	-6.97939	11.9012	-3.51061	-10.8232	-41.5987	6.22643	-0.460418	-21.6959
2.664	38.9425	-50.5448	-32.9396	1.50931	-2.47696	5.9656	4.09818	19.0298	15.3401	-28.9301	-13.1036	13.0688	-13.8945			-21.3666	-1.28981	-23.9394	-9.32856	-11.2822	-6.99327	11.8667	-3.54752	-10.8793	-41.5911	6.12111	-0.36309	-21.6009
2.666	38.9663	-50.4643	-32.9402	1.47932	-2.51926	5.97296	4.06721	19.0048	15.4174	-28.9138	-13.1772	13.2666	-14.0036			-21.3765	-1.40167	-23.8394	-9.30958	-11.2861	-6.98139	11.8567	-3.46149	-10.9793	-41.6086	6.02829	-0.207914	-21.6017
2.668	39.0333	-50.4953	-33.0078	1.43275	-2.56995	5.99773	3.98238	18.9872	15.4712	-28.9035	-13.1693	13.4324	-13.9845			-21.3169	-1.51186	-23.6993	-9.29848	-11.2638	-6.9634	11.848	-3.28007	-11.0735	-41.6273	5.9765	-0.148498	-21.5949
2.67	39.0929	-50.5993	-33.05	1.40619	-2.66116	6.07669	3.90485	18.9579	15.5668	-28.8957	-13.1166	13.5854	-13.8043			-21.2494	-1.50349	-23.5452	-9.31127	-11.315	-6.92754	11.8348	-3.1645	-11.1745	-41.6562	5.91587	-0.145278	-21.742
2.672	39.1433	-50.784	-33.0528	1.35845	-2.71873	6.14709	3.81742	19.0291	15.5659	-28.8944	-13.043	13.6346	-13.5711			-21.2122	-1.27431	-23.4877	-9.29134	-11.3312	-6.90467	11.8335	-3.08847	-11.2734	-41.6747	5.91758	-0.146636	-21.9445
2.674	39.1723	-50.9356	-33.0715	1.28523	-2.80413	6.16662	3.73213	19.0903	15.5785	-28.9113	-12.9799	13.5546	-13.3349			-21.1577	-0.898072	-23.4648	-9.26421	-11.3646	-6.86533	11.8378	-3.10668	-11.3346	-41.701	5.8997	-0.09513	-22.0924
2.676	39.1969	-51.0259	-33.1486	1.24188	-2.86488	6.15384	3.66723	19.1821	15.5448	-28.9253	-12.903	13.4366	-13.1258			-21.1386	-0.506562	-23.461	-9.24066	-11.4075	-6.83991	11.8348	-3.21371	-11.3469	-41.7476	5.94665	-0.0882	-22.0985
2.678	39.193	-51.0311	-33.2958	1.2245	-2.91873	6.13271	3.6379	19.2851	15.4807	-28.9564	-12.8855	13.3246	-13.1111			-21.2037	-0.387618	-23.4632	-9.22841	-11.3865	-6.81827	11.8082	-3.30655	-11.3236	-41.785	6.08679	-0.147826	-22.0689
2.68	39.2315	-51.0438	-33.4749	1.19955	-2.91248	6.0961	3.62499	19.4366	15.4059	-29.0007	-12.9675	13.2814	-13.1969			-21.2099	-0.40775	-23.4081	-9.2653	-11.3764	-6.83732	11.7705	-3.39382	-11.3967	-41.813	6.16661	-0.265314	-22.0225
2.682	39.282	-51.032	-33.7304	1.17268	-2.91696	6.07034	3.64223	19.579	15.3461	-29.0425	-13.0919	13.3089	-13.2526			-21.1061	-0.439166	-23.3432	-9.29144	-11.3688	-6.88093	11.7492	-3.50867	-11.4214	-41.8009	6.17779	-0.439754	-21.8049
2.684	39.3899	-50.9822	-34.0001	1.12381	-2.88147	6.03988	3.6311	19.6157	15.37	-29.0582	-13.2199	13.3459	-13.2623			-20.9938	-0.470008	-23.2695	-9.29872	-11.3839	-6.93284	11.7364	-3.63101	-11.3586	-41.7536	6.13116	-0.58891	-21.5957
2.686	39.5105	-50.9454	-34.1807	1.09236	-2.85215	6.01835	3.64545	19.6758	15.4201	-29.0684	-13.3177	13.4017	-13.2624			-20.8764	-0.51023	-23.0687	-9.32695	-11.3385	-6.99114	11.7504	-3.76426	-11.2508	-41.7154	6.14677	-0.813638	-21.3342
2.688	39.5918	-50.8916	-34.2711	1.06589	-2.84418	5.98268	3.64846	19.6087	15.4538	-29.0541	-13.4275	13.4597	-13.2403			-20.7707	-0.69601	-22.9648	-9.33107	-11.2556	-7.05627	11.7636	-3.859	-11.1136	-41.6825	6.09035	-0.957502	-21.088
2.69	39.7563	-50.893	-34.3699	1.00918	-2.84787	5.94028	3.66233	19.5544	15.5355	-29.0357	-13.5667	13.5052	-13.3371			-20.632	-0.929194	-22.8984	-9.40012	-11.1773	-7.11096	11.8097	-3.89859	-10.9898	-41.6188	6.0699	-1.07755	-20.8815
2.692	39.9318	-51.0612	-34.3942	0.980532	-2.81124	5.87941	3.66327	19.5763	15.6318	-29.0373	-13.6776	13.5481	-13.4676			-20.5045	-1.21013	-22.8645	-9.42462	-11.1667	-7.15936	11.8739	-3.88864	-10.989	-41.6169	6.04292	-1.24744	-20.6511
2.694	40.1341	-51.2085	-34.4439	0.970648	-2.80526	5.79589	3.64371	19.5914	15.6964	-29.0204	-13.74	13.6188	-13.6061			-20.386	-1.46191	-22.8525	-9.42806	-11.2152	-7.2148	11.9356	-3.90715	-10.905	-41.5599	6.02477	-1.39803	-20.5536
2.696	40.3552	-51.2728	-34.4185	0.912296	-2.77911	5.71145	3.63824	19.5841	15.6969	-29.0155	-13.8474	13.652	-13.6885			-20.2016	-1.6017	-22.8676	-9.46687	-11.2439	-7.24196	11.9486	-3.77021	-10.9418	-41.5659	5.97037	-1.58808	-20.544
2.698	40.6096	-51.3833	-34.4013	0.876204	-2.74805	5.66537	3.6931	19.6768	15.6277	-29.0047	-13.9176	13.725	-13.6661			-20.0227	-1.75696	-22.8822	-9.48443	-11.3198	-7.23194	11.9377	-3.50846	-10.9538	-41.5717	5.94922	-1.83854	-20.6608
2.7	40.8335	-51.4885	-34.4311	0.84763	-2.75596	5.66125	3.72922	19.8126	15.5876	-29.0227	-13.9854	13.7607	-13.4972			-19.8652	-1.96295	-22.9564	-9.50275	-11.3907	-7.22156	11.9074	-3.49229	-10.9936	-41.6061	5.84668	-1.92489	-21.0024
2.702	41.0566	-51.5075	-34.3354	0.819462	-2.75066	5.69156	3.72635	19.9929	15.5809	-29.0355	-14.0022	13.8084	-13.2566			-19.7307	-2.06944	-23.0112	-9.52386	-11.4541	-7.21967	11.8697	-3.61257	-11.079	-41.6473	5.78613	-2.12572	-21.3189
2.704	41.2014	-51.4608	-34.2331	0.841778	-2.76415	5.77816	3.69982	20.1732	15.6231	-29.0628	-13.9312	13.8386	-13.0171			-19.6555	-1.93775	-23.067	-9.53145	-11.518	-7.21987	11.8269	-3.75998	-11.1399	-41.6904	5.75854	-2.27342	-21.5016
2.706	41.3321	-51.362	-34.0791	0.825804	-2.80623	5.85711	3.64886	20.3725	15.6401	-29.0895	-13.8585	13.8548	-12.9139			-19.6162	-1.82423	-23.1646	-9.53886	-11.5639	-7.22422	11.7658	-3.94174	-11.2304	-41.7127	5.68677	-2.44691	-21.5787
2.708	41.4164	-51.1803	-33.9869	0.819336	-2.83039	5.87497	3.60466	20.5332	15.6919	-29.1157	-13.7783	13.9084	-12.9373			-19.6031	-1.84443	-23.2735	-9.5576	-11.5642	-7.19981	11.7161	-4.09458	-11.2936	-41.7822	5.62001	-2.62941	-21.5888
2.71	41.4367	-51.0458	-33.8227	0.778568	-2.87557	5.85953	3.55753	20.7685	15.6935	-29.1459	-13.7264	13.9591	-13.0538			-19.6266	-1.92042	-23.3617	-9.59336	-11.5584	-7.15238	11.679	-4.31823	-11.4024	-41.8389	5.66901	-2.91162	-21.4297
2.712	41.4254	-50.9485	-33.6158	0.812574	-2.92131	5.84926	3.55527	20.947	15.7605	-29.1825	-13.7121	14.0167	-13.1111			-19.6394	-2.02635	-23.528	-9.63987	-11.5545	-7.12726	11.6409	-4.4989	-11.4819	-41.9074	5.75602	-3.11027	-21.2429
2.714	41.3133	-50.8399	-33.4878	0.82964	-2.96117	5.82694	3.56976	21.0115	15.8012	-29.2547	-13.8062	14.0543	-13.1359			-19.7033	-2.08363	-23.6195	-9.66591	-11.563	-7.09785	11.6493	-4.57409	-11.5655	-42.0378	5.82865	-3.36056	-21.033
2.716	41.1058	-50.782	-33.3146	0.874118	-2.99788	5.80049	3.59181	21.0104	15.8369	-29.2955	-13.9346	14.0333	-13.1298			-19.7515	-1.99884	-23.648	-9.69903	-11.5246	-7.09246	11.6454	-4.59505	-11.664	-42.1153	5.8659	-3.60542	-20.7831
2.718	40.7621	-50.7915	-33.1461	0.95445	-3.02218	5.76169	3.61074	20.9496	15.914	-29.3361	-14.0711	14.0171	-13.1503			-19.6993	-1.82564	-23.6281	-9.73843	-11.4975	-7.10276	11.6536	-4.50395	-11.7361	-42.2085	5.90436	-3.7116	-20.5325
2.72	40.4891	-50.849	-33.081	1.01149	-2.99229	5.71963	3.63381	20.819	15.9459	-29.4051	-14.1914	14.0039	-13.1823			-19.58	-1.74828	-23.5615	-9.78811	-11.4787	-7.13616	11.6896	-4.51354	-11.8014	-42.3002	5.89012	-3.65294	-20.2835
2.722	40.266	-50.9459	-33.0781	1.07845	-2.96255	5.67615	3.65257	20.7403	16.0058	-29.5036	-14.3299	13.9936	-13.1991			-19.4459	-1.82886	-23.5746	-9.80052	-11.4703	-7.17209	11.7551	-4.41416	-11.8616	-42.4272	5.87565	-3.44974	-20.0616
2.724	40.1742	-51.0148	-33.1859	1.14114	-2.87118	5.64347	3.69564	20.715	16.0443	-29.5861	-14.4578	13.9318	-13.1653			-19.3356	-1.7576	-23.6029	-9.80949	-11.4769	-7.22861	11.7917	-4.27206	-11.9077	-42.5228	5.86225	-3.21315	-19.8919
2.726	40.1666	-51.0824	-33.4258	1.21167	-2.75194	5.59947	3.76935	20.693	16.0835	-29.6225	-14.5556	13.9684	-12.9987			-19.315	-1.62313	-23.6419	-9.8159	-11.5587	-7.29722	11.8261	-4.13238	-11.9706	-42.6226	5.85294	-2.95446	-19.6767
2.728	40.2431	-51.135	-33.6477	1.24463	-2.66896	5.55405	3.82815	20.7973	16.1176	-29.6335	-14.6772	13.9993	-12.8333			-19.3122	-1.6332	-23.6584	-9.75163	-11.5817	-7.33516	11.8383	-4.04375	-12.06	-42.6896	5.8562	-2.67037	-19.5272
2.73	40.3866	-51.2268	-33.898	1.30014	-2.62314	5.50155	3.83604	20.9154	16.1754	-29.6021	-14.8143	13.9512	-12.7529			-19.313	-1.81936	-23.5799	-9.69276	-11.6023	-7.36502	11.8278	-4.07863	-12.1005	-42.7305	5.85908	-2.41189	-19.481
2.732	40.5364	-51.3083	-34.1152	1.34688	-2.6293	5.4451	3.83075	21.0083	16.1882	-29.5792	-15.0026	13.9058	-12.6794			-19.3263	-2.00096	-23.5089	-9.66647	-11.6056	-7.3816	11.7935	-4.09492	-12.1754	-42.7306	5.84042	-2.2356	-19.477
2.734	40.737	-51.3522	-34.2154	1.33329	-2.66704	5.41948	3.78623	21.0294	16.2603	-29.574	-15.1635	13.8769	-12.654			-19.2823	-2.11554	-23.4591	-9.62004	-11.6113	-7.3834	11.749	-4.05839	-12.2402	-42.7272	5.80133	-2.25631	-19.4566
2.736	40.9355	-51.4079	-34.1931	1.31369	-2.71625	5.39925	3.74405	21.0128	16.3019	-29.579	-15.2643	13.8679	-12.7835			-19.1996	-2.25095	-23.4614	-9.57753	-11.6461	-7.38177	11.7107	-4.04216	-12.2843	-42.7316	5.74568	-2.40681	-19.4427
2.738	41.1323	-51.3908	-34.1555	1.31561	-2.76399	5.39872	3.70733	20.8554	16.3748	-29.6089	-15.2575	13.8873	-13.0083			-19.1454	-2.38827	-23.5338	-9.51033	-11.6407	-7.38024	11.6705	-4.00623	-12.361	-42.7358	5.69328	-2.62674	-19.4805
2.74	41.3431	-51.3965	-34.0552	1.31611	-2.82374	5.45236	3.66733	20.7113	16.3743	-29.6571	-15.1828	13.9197	-13.2552			-19.0637	-2.63788	-23.5956	-9.48399	-11.6623	-7.39395	11.6247	-4.05587	-12.4358	-42.7322	5.67241	-2.83147	-19.4973
2.742	41.5435	-51.3947	-33.7862	1.27861	-2.88652	5.5483	3.60258	20.5837	16.3471	-29.7008	-15.1138	13.9537	-13.4283			-18.9858	-2.9134	-23.6735	-9.44874	-11.6465	-7.43091	11.5909	-4.17654	-12.5409	-42.7187	5.60798	-3.05239	-19.4896
2.744	41.7573	-51.3373	-33.562	1.27134	-2.98399	5.59744	3.51581	20.4867	16.2961	-29.741	-14.9922	14.013	-13.4935			-18.9306	-3.08767	-23.7971	-9.44105	-11.6513	-7.44573	11.5586	-4.29887	-12.5482	-42.6983	5.61282	-3.23282	-19.4625
2.746	41.9797	-51.2538	-33.3593	1.26284	-3.08732	5.60951	3.43988	20.4541	16.1823	-29.7515	-14.9011	14.0586	-13.4426			-18.8366	-3.03796	-23.9594	-9.44679	-11.6409	-7.42158	11.5545	-4.42669	-12.4887	-42.6509	5.67371	-3.43346	-19.412
2.748	42.1858	-51.1247	-33.1855	1.24726	-3.18069	5.60242	3.40442	20.4298	16.1156	-29.7694	-14.8354	14.0782	-13.2958			-18.7473	-2.92494	-24.1649	-9.48144	-11.6279	-7.3817	11.5591	-4.4388	-12.5139	-42.6287	5.85521	-3.6255	-19.3365
2.75	42.3825	-51.0112	-33.0494	1.27119	-3.2318	5.58298	3.43704	20.4225	16.115	-29.8062	-14.8337	14.142	-13.1863			-18.6672	-2.87847	-24.3383	-9.53592	-11.6222	-7.34027	11.5701	-4.36807	-12.5512	-42.63	6.01189	-3.79922	-19.1673
2.752	42.6583	-50.949	-33.0014	1.26707	-3.23369	5.55304	3.50624	20.4677	16.1319	-29.8073	-14.8121	14.1592	-13.0051			-18.5276	-2.82142	-24.4425	-9.6124	-11.6349	-7.32211	11.5846	-4.29188	-12.4905	-42.6438	6.13813	-4.0136	-18.8956
2.754	42.9213	-50.9736	-33.0569	1.2725	-3.21436	5.49665	3.64658	20.6501	16.1884	-29.8004	-14.7854	14.2059	-12.8371			-18.3894	-2.7882	-24.3451	-9.67065	-11.6462	-7.34866	11.5836	-4.33857	-12.353	-42.6593	6.23994	-4.14098	-18.7078
2.756	43.2222	-51.0439	-33.0967	1.26025	-3.17187	5.44201	3.78398	20.8532	16.2527	-29.7995	-14.733	14.2555	-12.6903			-18.2593	-2.82177	-24.1034	-9.7557	-11.6254	-7.38748	11.5855	-4.41132	-12.2606	-42.6896	6.27431	-4.31302	-18.6628
2.758	43.3928	-51.0846	-33.1414	1.30245	-3.1191	5.38839	3.88196	21.0568	16.3229	-29.7995	-14.681	14.2737	-12.5931			-18.1781	-2.93497	-23.812	-9.80585	-11.6061	-7.46271	11.5582	-4.49572	-12.1464	-42.7299	6.32216	-4.4673	-18.6336
2.76	43.4125	-51.1329	-33.1654	1.34852	-3.06632	5.30473	3.92871	21.2746	16.4057	-29.8381	-14.6182	14.3233	-12.6192			-18.1447	-3.10321	-23.615	-9.87976	-11.5726	-7.529	11.5586	-4.57505	-12.131	-42.8341	6.3316	-4.62686	-18.6391
2.762	43.3402	-51.2054	-33.1035	1.36938	-3.00608	5.22346	3.92749	21.4574	16.4378	-29.8958	-14.545	14.3721	-12.7867			-18.1695	-3.3699	-23.5863	-9.90879	-11.5312	-7.61477	11.578	-4.6472	-12.0959	-43.0052	6.25934	-4.81922	-18.7208
2.764	43.2164	-51.3123	-33.1497	1.4	-3.02067	5.14273	3.88872	21.6694	16.4054	-29.9552	-14.418	14.3958	-13.0543			-18.2226	-3.65852	-23.5956	-9.89789	-11.5438	-7.67372	11.5739	-4.7608	-12.0329	-43.1354	6.05557	-5.0132	-18.83
2.766	43.1334	-51.2825	-33.3072	1.47293	-3.02303	5.07685	3.84628	21.8687	16.3419	-30.0218	-14.3387	14.4612	-13.1989			-18.2928	-3.92071	-23.6245	-9.8327	-11.5432	-7.74546	11.559	-4.85555	-12.0634	-43.2951	5.87454	-5.21119	-18.8728
2.768	43.0432	-51.1939	-33.5069	1.51581	-3.08822	5.0392	3.80559	22.043	16.3346	-30.0851	-14.3603	14.5317	-13.2278			-18.4006	-4.15905	-23.6827	-9.69793	-11.5705	-7.81448	11.5472	-4.96178	-12.1553	-43.4349	5.73913	-5.4185	-18.8585
2.77	42.9737	-51.1703	-33.6709	1.57315	-3.1367	5.00402	3.74192	22.3095	16.318	-30.1783	-14.3745	14.6407	-13.1725			-18.5325	-4.46968	-23.7203	-9.58394	-11.5976	-7.88374	11.5222	-5.064	-12.2043	-43.608	5.59635	-5.62631	-18.7985
2.772	42.901	-51.1759	-33.7153	1.6382	-3.17729	5.01514	3.64004	22.4836	16.359	-30.2827	-14.3212	14.7442	-13.056			-18.6203	-4.88726	-23.7863	-9.52251	-11.6168	-7.90091	11.4945	-5.13279	-12.2901	-43.7902	5.61634	-5.65764	-18.7469
2.774	42.8573	-51.2323	-33.7517	1.66995	-3.2285	5.03562	3.54805	22.48	16.365	-30.4291	-14.3212	14.8427	-12.9151			-18.598	-5.28326	-23.8855	-9.41958	-11.6398	-7.88176	11.4859	-5.18552	-12.3769	-44.0347	5.66614	-5.68338	-18.6828
2.776	42.8791	-51.2769	-33.725	1.6696	-3.27095	5.06827	3.47495	22.4823	16.4052	-30.3547	-14.3864	14.9219	-12.8214			-18.5246	-5.42746	-23.9435	-9.33218	-11.6983	-7.84652	11.4872	-5.24747	-12.4652	-44.0339	5.76538	-5.58078	-18.435
2.778	42.9841	-51.3284	-33.6532	1.68126	-3.28154	5.09918	3.39865	22.3685	16.4952	-30.3296	-14.4866	14.9235	-12.7777			-18.4396	-5.31199	-23.9144	-9.25744	-11.795	-7.76692	11.5004	-5.28112	-12.5569	-44.0783	5.81603	-5.54884	-18.1045
2.78	43.1563	-51.42	-33.5608	1.70271	-3.21772	5.10369	3.38617	22.3362	16.4976	-30.3084	-14.6004	14.7311	-12.7396			-18.3403	-5.23933	-23.9629	-9.20133	-11.8585	-7.65808	11.5275	-5.2303	-12.5998	-44.076	5.86656	-5.55694	-17.7836
2.782	43.3688	-51.6216	-33.4329	1.70192	-3.16029	5.08724	3.41684	22.3115	16.5261	-30.2882	-14.7102	14.4789	-12.699			-18.1896	-5.17709	-24.015	-9.2616	-11.9217	-7.58444	11.5425	-5.04088	-12.6737	-44.0708	5.91738	-5.61625	-17.4808
2.784	43.5921	-51.7611	-33.3048	1.68615	-3.1362	5.09953	3.51249	22.274	16.546	-30.2999	-14.8272	14.2556	-12.6175			-18.0675	-5.26106	-24.0189	-9.38092	-11.9563	-7.54383	11.5236	-4.85902	-12.714	-44.0558	5.94132	-5.59538	-17.1862
2.786	43.823	-51.8398	-33.1204	1.71027	-3.16982	5.1028	3.61714	22.3406	16.6028	-30.3033	-14.9411	14.1314	-12.4982			-17.9276	-5.33936	-23.9954	-9.4683	-11.9276	-7.54851	11.483	-4.72536	-12.7611	-43.9904	5.94664	-5.64579	-16.9321
2.788	44.0743	-51.811	-32.9863	1.72696	-3.23631	5.08588	3.71958	22.4812	16.6393	-30.2935	-15.0427	14.0761	-12.377			-17.8006	-5.3706	-23.9919	-9.6032	-11.9164	-7.55583	11.4578	-4.71107	-12.7972	-43.9113	5.97635	-5.70773	-16.8287
2.79	44.3675	-51.7157	-32.9062	1.73408	-3.3336	5.08229	3.75869	22.6301	16.6754	-30.3263	-15.1504	14.0891	-12.39			-17.6163	-5.44915	-23.9561	-9.70689	-11.8618	-7.56704	11.4484	-4.71419	-12.8352	-43.8249	6.00527	-5.70858	-16.9592
2.792	44.6576	-51.6108	-32.836	1.71511	-3.39192	5.05854	3.77301	22.7696	16.729	-30.3877	-15.2942	14.1777	-12.4105			-17.4813	-5.75228	-23.8676	-9.85698	-11.8057	-7.59287	11.4505	-4.72695	-12.8859	-43.8081	6.00999	-5.7308	-17.1306
2.794	44.9695	-51.5068	-32.871	1.66174	-3.47809	5.0409	3.73787	22.8626	16.7262	-30.4758	-15.4419	14.3898	-12.486			-17.3204	-6.33069	-23.8712	-9.93531	-11.7629	-7.62934	11.4478	-4.73722	-12.93	-43.8992	6.06606	-5.61897	-17.2779
2.796	45.2589	-51.4537	-33.0235	1.63285	-3.54295	5.02968	3.69093	22.9212	16.772	-30.3999	-15.6232	14.5699	-12.6478			-17.1855	-6.82472	-23.8574	-9.91729	-11.7398	-7.68065	11.441	-4.74831	-12.972	-43.8129	6.06732	-5.50694	-17.4078
2.798	45.4965	-51.3973	-33.2277	1.64577	-3.5841	5.02041	3.63609	22.928	16.8029	-30.5505	-15.7574	14.7846	-12.6737			-17.1235	-7.09892	-23.9408	-9.78559	-11.6914	-7.75113	11.4344	-4.82621	-13.0011	-44.0193	6.1013	-5.44072	-17.5178
2.8	45.5803	-51.3771	-33.4764	1.715	-3.56584	5.02895	3.55064	22.7101	16.8173	-30.6429	-15.8399	14.91	-12.6569			-17.0951	-7.22756	-24.0838	-9.71222	-11.7151	-7.83479	11.4081	-4.85139	-13.0564	-44.1527	6.04498	-5.4048	-17.5495
2.802	45.4962	-51.346	-33.7303	1.72064	-3.5251	4.99675	3.48292	22.6069	16.8583	-30.7132	-15.8966	14.895	-12.5751			-17.1571	-7.39133	-24.1203	-9.59395	-11.7865	-7.94263	11.4209	-4.85765	-13.0741	-44.2932	5.96389	-5.39608	-17.5945
2.804	45.421	-51.4228	-33.8085	1.7271	-3.41166	4.95617	3.41317	22.4196	16.8789	-30.7774	-15.8966	14.8574	-12.502			-17.1633	-7.58141	-24.2501	-9.50253	-11.8902	-8.05484	11.43	-4.8594	-13.1681	-44.4385	5.86027	-5.37261	-17.6644
2.806	45.2805	-51.6097	-33.7788	1.7411	-3.36524	4.9342	3.36969	22.2081	16.8183	-30.8395	-15.913	14.7355	-12.4299			-17.183	-7.6474	-24.3122	-9.41132	-11.9906	-8.1233	11.4528	-4.86415	-13.2305	-44.566	5.77669	-5.38175	-17.594
2.808	45.1646	-51.7586	-33.6894	1.72817	-3.34127	4.92703	3.37439	22.0696	16.7619	-30.9333	-15.8694	14.596	-12.4013			-17.1967	-7.6714	-24.3178	-9.30951	-12.0574	-8.11647	11.469	-4.84568	-13.3027	-44.7244	5.73941	-5.37466	-17.466
2.81	44.9848	-51.8485	-33.6313	1.75827	-3.35166	4.88186	3.48153	21.9158	16.6946	-30.9865	-15.8007	14.5426	-12.4088			-17.1444	-7.72593	-24.3714	-9.24717	-12.059	-8.01816	11.4591	-4.85485	-13.3037	-44.8224	5.7507	-5.50446	-17.3559
2.812	44.7627	-51.8616	-33.4287	1.75886	-3.38675	4.80663	3.60686	21.7842	16.6534	-31.0571	-15.7496	14.5344	-12.3875			-17.0869	-7.78803	-24.4643	-9.26169	-12.0393	-7.94881	11.4354	-4.84204	-13.2824	-44.9534	5.8233	-5.63373	-17.2209
2.814	44.6056	-51.693	-33.2421	1.78144	-3.46875	4.72893	3.68865	21.8023	16.6254	-31.1063	-15.8208	14.5507	-12.3548			-17.1333	-7.84358	-24.4096	-9.34742	-12.0224	-7.91122	11.389	-4.83417	-13.2274	-45.0645	5.91101	-5.75767	-17.0966
2.816	44.5435	-51.4996	-33.032	1.76833	-3.58238	4.67746	3.72789	21.9441	16.5909	-31.1773	-15.9182	14.5501	-12.3375			-17.1702	-7.89506	-24.3733	-9.44923	-12.0044	-7.89138	11.3336	-4.81069	-13.1469	-45.1818	6.00342	-5.96883	-16.98
2.818	44.5752	-51.3348	-32.8827	1.77261	-3.67896	4.67225	3.75021	22.1031	16.575	-31.248	-16.0284	14.6133	-12.3094			-17.152	-7.91364	-24.2801	-9.55609	-12.0107	-7.91197	11.3409	-4.80962	-13.0105	-45.3097	6.07984	-6.15202	-16.8584
2.82	44.6855	-51.2257	-32.8301	1.74794	-3.76468	4.70548	3.73799	22.26	16.6052	-31.2751	-16.1286	14.6326	-12.2851			-17.1628	-7.95865	-24.2199	-9.66097	-11.9872	-7.95271	11.3445	-4.81701	-12.9247	-45.4092	6.12557	-6.33627	-16.7449
2.822	44.8794	-51.2743	-32.7855	1.77957	-3.8246	4.73416	3.70478	22.4209	16.6822	-31.247	-16.2598	14.6523	-12.2853			-17.0972	-8.19589	-24.2109	-9.7728	-11.954	-8.00191	11.3502	-4.81676	-12.8239	-45.481	6.19118	-6.50835	-16.627
2.824	45.0634	-51.3563	-32.8961	1.78227	-3.84915	4.75633	3.63572	22.5771	16.6993	-31.1852	-16.3463	14.6727	-12.2533			-17.0184	-8.80033	-24.2135	-9.86677	-11.9326	-8.06642	11.3479	-4.84924	-12.7845	-45.5129	6.20848	-6.71632	-16.5098
2.826	45.2422	-51.337	-33.1136	1.75363	-3.86714	4.7963	3.55979	22.7335	16.675	-31.1416	-16.4699	14.7093	-12.2124			-16.9623	-9.36207	-24.3022	-9.90578	-11.9137	-8.13688	11.3339	-4.86136	-12.7542	-45.5188	6.2648	-6.83836	-16.3221
2.828	45.4078	-51.4013	-33.3074	1.66547	-3.80979	4.82392	3.47514	22.9177	16.6296	-31.0845	-16.5669	14.7181	-12.1677			-16.8969	-9.61008	-24.4272	-9.87662	-11.9251	-8.19318	11.3318	-4.89079	-12.7684	-45.4903	6.31814	-7.00053	-16.1557
2.83	45.5612	-51.4938	-33.5215	1.72113	-3.74818	4.78603	3.4105	23.0684	16.582	-31.0405	-16.6704	14.7134	-12.1039			-16.8522	-9.6286	-24.4993	-9.78559	-11.9148	-8.22018	11.3403	-4.95978	-12.7967	-45.4183	6.38341	-7.15135	-15.9522
2.832	45.7428	-51.5367	-33.6167	1.8086	-3.6822	4.73351	3.37025	23.1869	16.5989	-30.9692	-16.7928	14.7428	-12.0502			-16.7989	-9.48263	-24.4894	-9.73136	-11.9317	-8.15674	11.3636	-5.06393	-12.8448	-45.1797	6.42733	-7.29011	-15.7289
2.834	45.9817	-51.436	-33.585	1.91654	-3.59464	4.63898	3.42857	23.2329	16.5976	-31.0552	-16.9048	14.8061	-12.0057			-16.7163	-9.38416	-24.4268	-9.68817	-11.9179	-8.06327	11.3683	-5.15558	-12.9039	-45.1832	6.46026	-7.42549	-15.5485
2.836	46.2261	-51.2439	-33.5254	1.93267	-3.56957	4.54168	3.52843	23.2171	16.6379	-31.147	-17.0088	14.9173	-11.9674			-16.6727	-9.27872	-24.3889	-9.60015	-11.9275	-7.99002	11.3179	-5.22631	-12.9382	-45.1162	6.52007	-7.4797	-15.3446
2.838	46.4829	-51.0981	-33.43	1.97907	-3.58413	4.43681	3.62324	23.1748	16.6562	-31.1954	-17.1295	15.0048	-11.8916			-16.5805	-9.25901	-24.415	-9.50004	-11.9633	-7.95036	11.2638	-5.27894	-13.0657	-45.1031	6.57427	-7.48576	-15.1237
2.84	46.7616	-51.1263	-33.3012	2.01604	-3.64496	4.37553	3.68207	23.1321	16.6882	-31.1959	-17.2255	15.111	-11.8459			-16.4725	-9.36718	-24.4901	-9.41143	-11.9314	-7.95361	11.2173	-5.27019	-13.0849	-45.1533	6.58161	-7.31157	-14.8724
2.842	47.0194	-51.1809	-33.1479	2.03644	-3.69272	4.40048	3.71084	23.045	16.7038	-31.2236	-17.2369	15.1093	-11.787			-16.3831	-9.77337	-24.5668	-9.34991	-11.9602	-8.00209	11.1928	-5.18479	-13.1449	-45.2492	6.54492	-7.16698	-14.6564
2.844	47.3572	-51.2051	-32.9472	2.08335	-3.76037	4.48132	3.70532	22.844	16.744	-31.2114	-17.253	15.032	-11.6522			-16.2457	-10.4926	-24.5941	-9.35473	-11.9577	-8.06254	11.2048	-5.05295	-13.1851	-45.2649	6.46997	-7.03766	-14.4992
2.846	47.7101	-51.2454	-32.7445	2.11751	-3.84713	4.57575	3.67307	22.6163	16.7777	-31.3787	-17.2303	14.8942	-11.554			-16.124	-11.1121	-24.6074	-9.41014	-11.9935	-8.11605	11.2318	-4.85513	-13.2541	-45.4909	6.33296	-6.98918	-14.4738
2.848	48.027	-51.3189	-32.5852	2.1083	-3.91695	4.61332	3.5842	22.5178	16.8403	-31.4164	-17.2358	14.7719	-11.4647			-16.0034	-11.4027	-24.6059	-9.47911	-12.0349	-8.15688	11.2392	-4.68349	-13.2996	-45.6357	6.29394	-7.08282	-14.4945
2.85	48.2846	-51.3511	-32.4953	2.10207	-3.95356	4.6012	3.52103	22.6688	16.8433	-31.4815	-17.1312	14.7109	-11.4144			-15.9202	-11.3635	-24.6062	-9.55116	-12.0981	-8.14512	11.2322	-4.65676	-13.3377	-45.7412	6.33993	-7.30537	-14.5474
2.852	48.2835	-51.3871	-32.5297	2.06987	-3.93313	4.56557	3.45436	22.8541	16.9116	-31.5429	-17.0146	14.6469	-11.4657			-15.9233	-11.1925	-24.5921	-9.6319	-12.1753	-8.10453	11.2371	-4.64919	-13.4006	-45.8511	6.43366	-7.51489	-14.6309
2.854	48.182	-51.275	-32.7642	2.0537	-3.89928	4.49344	3.40595	23.0804	16.9307	-31.6116	-16.9875	14.6078	-11.6732			-15.9726	-11.1579	-24.634	-9.7013	-12.2223	-8.07174	11.2539	-4.67779	-13.4489	-45.9482	6.55614	-7.7421	-14.683
2.856	48.0757	-51.0236	-33.0389	1.98127	-3.85986	4.39601	3.36918	23.3256	16.9544	-31.6833	-16.9643	14.5892	-11.9237			-15.9855	-11.181	-24.6621	-9.7281	-12.2447	-8.05851	11.2752	-4.66607	-13.4909	-46.0629	6.69742	-7.86192	-14.7435
2.858	47.9664	-50.8963	-33.3394	1.95458	-3.89995	4.27304	3.41523	23.4757	16.9968	-31.7458	-17.0048	14.573	-12.0899			-16.0032	-11.1818	-24.6303	-9.72735	-12.1945	-8.04033	11.2705	-4.69262	-13.5337	-46.1613	6.80446	-8.0026	-14.709
2.86	47.8359	-50.9673	-33.4591	1.95735	-3.92636	4.13963	3.52621	23.6583	17.0016	-31.7944	-17.0057	14.5211	-12.1388			-16.0471	-11.2241	-24.5401	-9.70061	-12.1183	-8.02487	11.2542	-4.70168	-13.5766	-46.234	6.87918	-8.16375	-14.6998
2.862	47.6176	-51.1045	-33.4581	2.01663	-3.96171	4.02777	3.64718	23.8908	17.0164	-31.8658	-17.0576	14.5164	-12.0814			-16.0986	-11.5134	-24.4563	-9.74228	-12.0163	-8.01619	11.2288	-4.71295	-13.5925	-46.3358	6.98071	-8.29388	-14.7667
2.864	47.4496	-51.2835	-33.4088	2.17361	-3.981	3.95553	3.75088	24.1437	17.0262	-31.9045	-17.0316	14.4761	-11.9978			-16.2052	-12.073	-24.4191	-9.78881	-11.9302	-8.01591	11.2007	-4.70683	-13.6378	-46.4453	7.05263	-8.42979	-14.9124
2.866	47.3702	-51.4579	-33.2718	2.25967	-4.03962	3.92622	3.78617	24.4034	17.0199	-31.8966	-16.9785	14.4247	-11.8728			-16.2332	-12.6525	-24.4823	-9.83949	-11.8888	-8.02557	11.1833	-4.74214	-13.6504	-46.5055	7.07448	-8.55257	-15.0343
2.868	47.3906	-51.5727	-33.1033	2.30896	-4.0605	3.96402	3.79113	24.634	17.0635	-31.8274	-16.9047	14.3899	-11.7676			-16.2306	-12.9641	-24.6919	-9.90758	-11.8887	-8.05487	11.1972	-4.77694	-13.6936	-46.5123	7.06671	-8.78108	-14.991
2.87	47.5238	-51.6512	-32.9219	2.37671	-4.06902	4.0475	3.77433	24.7493	17.0753	-31.7599	-16.8488	14.3595	-11.6856			-16.1997	-12.9308	-24.932	-10.0225	-11.9784	-8.11107	11.1925	-4.82447	-13.7496	-46.4871	6.97612	-8.97662	-14.8423
2.872	47.7106	-51.5759	-32.6894	2.4859	-4.03778	4.11195	3.72494	24.7055	17.1297	-31.681	-16.7731	14.2644	-11.5971			-16.1878	-12.7457	-25.2539	-10.1343	-12.0483	-8.15714	11.1918	-4.87805	-13.7821	-46.421	6.83008	-9.06364	-14.5929
2.874	47.9184	-51.4097	-32.521	2.5292	-3.98933	4.14186	3.63846	24.5777	17.1375	-31.6451	-16.7837	14.1755	-11.5239			-16.1176	-12.6766	-25.5001	-10.1646	-12.1629	-8.16928	11.1728	-4.86639	-13.8122	-46.3	6.71882	-9.12723	-14.3439
2.876	48.1647	-51.1729	-32.2817	2.62626	-3.94971	4.16284	3.54949	24.4809	17.1407	-31.6655	-16.8347	14.2099	-11.4169			-16.0703	-12.7463	-25.6669	-10.229	-12.268	-8.1151	11.1664	-4.854	-13.8772	-46.1553	6.60656	-9.07325	-14.0946
2.878	48.3892	-51.0017	-32.0289	2.7278	-3.9188	4.14767	3.48643	24.374	17.1866	-31.7656	-16.8103	14.2381	-11.352			-15.9924	-12.7474	-25.8331	-10.2262	-12.3209	-8.04006	11.1667	-4.81804	-13.9269	-46.0985	6.51791	-8.99076	-13.8422
2.88	48.5783	-51.0568	-31.887	2.81113	-3.92015	4.08988	3.44677	24.2688	17.2092	-31.8035	-16.7147	14.3023	-11.2922			-15.9181	-12.7994	-25.8187	-10.1799	-12.3256	-8.01535	11.194	-4.7438	-14.0035	-46.0928	6.46639	-8.87793	-13.6278
2.882	48.6907	-51.2514	-31.8674	3.00264	-3.93995	3.99636	3.4144	24.1979	17.2732	-31.8273	-16.6334	14.351	-11.2017			-15.8211	-13.0369	-25.797	-10.2266	-12.3194	-8.00722	11.195	-4.64205	-14.0974	-46.1403	6.46876	-8.7005	-13.4003
2.884	48.7984	-51.4323	-31.9998	2.99135	-4.00883	3.87047	3.46525	24.2293	17.302	-31.8713	-16.5896	14.328	-11.1373			-15.637	-13.4822	-25.7564	-10.0551	-12.2825	-8.0275	11.2065	-4.49053	-14.1932	-46.2514	6.49193	-8.52998	-13.2015
2.886	48.845	-51.6526	-32.1863	2.83359	-4.09436	3.74055	3.58166	24.3786	17.3505	-31.9409	-16.616	14.2793	-11.0616			-15.5011	-13.9918	-25.6345	-9.81653	-12.2536	-8.03758	11.2013	-4.45822	-14.2642	-46.3846	6.54688	-8.34896	-12.9761
2.888	48.8736	-51.8749	-32.3871	2.83209	-4.19308	3.61	3.68728	24.4691	17.4088	-32.0277	-16.6481	14.2189	-10.9187			-15.4467	-14.369	-25.5612	-9.8442	-12.2225	-8.08903	11.1722	-4.43866	-14.353	-46.4993	6.54443	-8.13068	-12.7182
2.89	48.8459	-51.9771	-32.6318	2.78779	-4.28553	3.51662	3.76062	24.5596	17.4281	-32.1071	-16.6691	14.1941	-10.8013			-15.4479	-14.4124	-25.4039	-9.76696	-12.1936	-8.1669	11.1443	-4.42942	-14.4804	-46.6097	6.58368	-8.0257	-12.6334
2.892	48.7994	-51.9565	-32.7204	2.61554	-4.30191	3.44285	3.78578	24.6491	17.4106	-32.1698	-16.7168	14.1832	-10.7324			-15.4838	-14.3368	-25.3549	-9.64656	-12.1418	-8.26011	11.1492	-4.40441	-14.5863	-46.7489	6.64516	-8.01154	-12.6488
2.894	48.6699	-51.8407	-32.7285	2.65601	-4.31584	3.41302	3.77052	24.5735	17.3562	-32.2497	-16.7691	14.2369	-10.6551			-15.6472	-14.223	-25.3706	-9.74457	-12.0962	-8.31398	11.1339	-4.36302	-14.6022	-46.8537	6.69115	-7.91759	-12.6857
2.896	48.532	-51.6763	-32.6645	2.5284	-4.31775	3.41932	3.73936	24.4526	17.2743	-32.311	-16.8133	14.2988	-10.6631			-15.86	-14.2245	-25.4678	-9.64214	-12.0678	-8.32104	11.1351	-4.4504	-14.5218	-46.9506	6.71255	-7.89278	-12.748
2.898	48.4756	-51.4722	-32.614	2.47324	-4.25172	3.46368	3.70646	24.2886	17.1733	-32.382	-16.8409	14.3664	-10.7806			-16.0515	-14.2216	-25.5799	-9.6837	-12.0492	-8.28758	11.1355	-4.56376	-14.4912	-47.045	6.78355	-7.90317	-12.8105
2.9	48.4798	-51.2922	-32.5317	2.42715	-4.20417	3.51826	3.65096	24.1673	17.0784	-32.4449	-16.8918	14.3991	-10.9915			-16.1167	-14.0525	-25.6483	-9.68657	-12.1175	-8.22457	11.1217	-4.74554	-14.41	-47.1441	6.83726	-7.97847	-12.8681
2.902	48.4859	-51.1295	-32.4125	2.40807	-4.14688	3.56572	3.56789	24.1685	17.076	-32.421	-16.9391	14.4058	-11.1897			-16.1262	-13.9265	-25.7665	-9.74792	-12.1838	-8.15069	11.1098	-4.91539	-14.338	-47.1947	6.90934	-8.11301	-12.8692
2.904	48.5508	-51.1503	-32.2975	2.40569	-4.10106	3.65091	3.49744	24.119	17.1038	-32.2805	-16.9655	14.3851	-11.309			-16.0617	-14.1243	-25.8702	-9.79968	-12.204	-8.06207	11.1127	-4.93665	-14.2402	-47.1047	7.00052	-8.2651	-12.8085
2.906	48.7066	-51.2725	-32.1541	2.46068	-4.1251	3.74923	3.45198	24.0866	17.1628	-32.2999	-17.0184	14.3669	-11.3035			-15.9872	-14.5966	-25.9847	-9.86059	-12.2014	-7.98584	11.129	-4.94767	-14.1552	-47.2244	7.06483	-8.39003	-12.8507
2.908	48.8509	-51.518	-32.0473	2.60569	-4.16891	3.81872	3.43158	24.1205	17.1726	-32.1874	-17.0625	14.3668	-11.2169			-15.9147	-15.153	-26.0498	-9.97818	-12.2149	-7.94511	11.1461	-4.81705	-14.124	-47.0814	7.15141	-8.55693	-12.8376
2.91	48.962	-51.7588	-31.8847	2.588	-4.23116	3.85624	3.48002	24.2624	17.1643	-32.1466	-17.1272	14.3414	-11.0853			-15.8868	-15.6056	-26.1042	-9.89068	-12.2127	-7.92775	11.1426	-4.75629	-14.0906	-47.0204	7.24177	-8.78055	-12.8454
2.912	49.0407	-51.8562	-31.6602	2.72453	-4.3331	3.88217	3.58232	24.4177	17.1481	-32.2327	-17.1701	14.3267	-10.9386			-15.8246	-15.8439	-26.1155	-9.96349	-12.2219	-7.91543	11.1115	-4.65195	-14.0544	-47.0323	7.31697	-8.94414	-12.7993
2.914	49.1699	-51.8543	-31.5116	2.72794	-4.42247	3.8754	3.68424	24.5797	17.1133	-32.2422	-17.3199	14.3105	-10.8039			-15.7349	-15.9424	-26.0703	-9.92519	-12.2587	-7.90591	11.0574	-4.60684	-14.1102	-46.8103	7.37631	-9.09175	-12.6183
2.916	49.2701	-51.8946	-31.383	2.74333	-4.46191	3.87499	3.77845	24.7729	17.0868	-32.4141	-17.4426	14.3338	-10.6598			-15.6183	-15.9435	-26.029	-9.936	-12.2664	-7.89677	11.0072	-4.49602	-14.1413	-46.8855	7.37275	-9.25746	-12.3981
2.918	49.3488	-51.879	-31.3088	2.70225	-4.54649	3.86739	3.80968	25.0245	17.0746	-32.4521	-17.5813	14.321	-10.5523			-15.5083	-15.911	-25.9771	-9.96296	-12.3264	-7.88787	11.0118	-4.3965	-14.1823	-46.8991	7.38189	-9.42635	-12.1888
2.92	49.3654	-51.879	-31.2494	2.63179	-4.54408	3.85767	3.81578	25.2959	17.0795	-32.4591	-17.662	14.323	-10.4045			-15.404	-15.6646	-25.9854	-9.94172	-12.3844	-7.87574	11.0193	-4.34445	-14.2552	-46.9726	7.32824	-9.55111	-11.9451
2.922	49.3743	-51.8831	-31.3805	2.57102	-4.54436	3.84976	3.78883	25.4921	17.0918	-32.4786	-17.7111	14.2944	-10.2704			-15.3669	-15.2922	-26.0548	-9.94144	-12.4507	-7.86173	11.0008	-4.28256	-14.3176	-47.0763	7.29996	-9.71866	-11.6911
2.924	49.3074	-51.8917	-31.5464	2.58957	-4.53401	3.81184	3.74493	25.6682	17.0674	-32.5398	-17.6998	14.2933	-10.1418			-15.364	-14.893	-26.1682	-9.96442	-12.4844	-7.85715	11.0056	-4.26236	-14.4095	-47.1975	7.24203	-9.87129	-11.4614
2.926	49.2711	-51.8893	-31.8114	2.59792	-4.4995	3.76816	3.69082	25.808	17.0861	-32.6535	-17.6303	14.2837	-9.98675			-15.3975	-14.7024	-26.2823	-9.99519	-12.5385	-7.88105	11.0275	-4.303	-14.5236	-47.3515	7.23499	-9.99832	-11.2839
2.928	49.2454	-51.8873	-32.0088	2.62564	-4.48979	3.70322	3.61809	25.908	17.1209	-32.7404	-17.575	14.3035	-9.83535			-15.4963	-14.7427	-26.3371	-10.0793	-12.5341	-7.91144	11.0236	-4.37557	-14.5525	-47.5015	7.24482	-10.1204	-11.2152
2.93	49.2475	-51.9211	-32.0632	2.60817	-4.52698	3.66491	3.5336	25.9264	17.1747	-32.812	-17.5355	14.2925	-9.73715			-15.6022	-14.8692	-26.3071	-10.1162	-12.5066	-7.9185	11.0473	-4.45148	-14.632	-47.5984	7.31203	-10.2531	-11.2347
2.932	49.2588	-51.955	-32.1134	2.63694	-4.61906	3.60847	3.48457	25.9345	17.2131	-32.8886	-17.5229	14.2786	-9.67058			-15.7674	-15.0049	-26.2271	-10.2095	-12.4804	-7.91249	11.0542	-4.50078	-14.7015	-47.7011	7.39449	-10.3747	-11.2876
2.934	49.2673	-51.9761	-32.0808	2.62667	-4.73855	3.55575	3.45043	25.8567	17.2647	-32.8648	-17.5337	14.3026	-9.68918			-15.8894	-15.2852	-26.1714	-10.2849	-12.4766	-7.87846	11.0618	-4.50667	-14.8061	-47.6888	7.46795	-10.5365	-11.3447
2.936	49.3006	-51.9971	-31.9549	2.64824	-4.80739	3.50994	3.47917	25.6729	17.2956	-32.9361	-17.562	14.326	-9.84959			-15.8992	-15.5872	-26.2368	-10.2531	-12.4435	-7.82607	11.0777	-4.43824	-14.8983	-47.7722	7.57378	-10.6715	-11.3901
2.938	49.3616	-52.0483	-31.7751	2.82083	-4.90283	3.4557	3.58222	25.4116	17.3524	-33.1122	-17.6148	14.3833	-10.0842			-15.8626	-15.8135	-26.3801	-10.5502	-12.4034	-7.77283	11.0574	-4.32044	-14.9976	-47.9682	7.67829	-10.7531	-11.4117
2.94	49.4578	-52.0751	-31.6279	2.86097	-4.92694	3.41971	3.67675	25.2289	17.3948	-33.031	-17.6404	14.5069	-10.2978			-15.8206	-15.9327	-26.464	-10.5072	-12.3727	-7.72407	11.0143	-4.18905	-15.038	-47.9466	7.7737	-10.7362	-11.3518
2.942	49.5811	-52.1264	-31.4673	3.01658	-4.94155	3.41543	3.76652	25.276	17.4775	-33.0759	-17.6675	14.6022	-10.3796			-15.7701	-15.9571	-26.4748	-10.7657	-12.2987	-7.72626	10.9711	-4.06137	-15.1408	-48.0485	7.87149	-10.6953	-11.3441
2.944	49.6605	-52.1725	-31.2222	3.12487	-4.93541	3.45751	3.82036	25.4287	17.4982	-32.9996	-17.7042	14.6217	-10.2818			-15.6545	-15.8224	-26.5257	-10.7831	-12.3061	-7.79111	10.9653	-3.97936	-15.1962	-48.0312	7.98038	-10.6458	-11.3306
2.946	49.7487	-52.3313	-30.9784	3.17096	-4.87514	3.49941	3.84051	25.5495	17.5388	-32.8902	-17.7559	14.5419	-10.1871			-15.5293	-15.5975	-26.5238	-10.7191	-12.2926	-7.84192	10.973	-3.87229	-15.2327	-47.9032	8.05577	-10.617	-11.3887
2.948	49.8245	-52.5794	-30.8217	3.13561	-4.8323	3.52383	3.8205	25.6587	17.5787	-32.9691	-17.8006	14.4671	-10.0614			-15.4088	-15.3289	-26.5013	-10.5191	-12.3683	-7.87494	10.9841	-3.78704	-15.3101	-47.9494	8.1555	-10.5288	-11.4346
2.95	49.8756	-52.8238	-30.7979	3.16777	-4.75691	3.53468	3.80167	25.7538	17.5883	-33.0015	-17.8231	14.3364	-9.93838			-15.2948	-15.0496	-26.5034	-10.5766	-12.4684	-7.90371	10.9676	-3.70453	-15.3471	-47.795	8.22053	-10.5067	-11.3417
2.952	49.8633	-52.9818	-30.897	3.03432	-4.72021	3.53072	3.77997	25.869	17.6281	-33.0823	-17.8629	14.1698	-9.80098			-15.2294	-14.7515	-26.5009	-10.3872	-12.5071	-7.88911	10.9513	-3.75598	-15.3766	-47.7226	8.30865	-10.509	-11.1654
2.954	49.8143	-52.9959	-31.074	2.96727	-4.68447	3.50486	3.74191	25.8754	17.6765	-33.1516	-17.8868	14.0503	-9.70136			-15.2252	-14.5488	-26.5679	-10.3071	-12.4852	-7.85841	10.9428	-3.77371	-15.436	-47.6934	8.42355	-10.5516	-10.9855
2.956	49.7853	-52.9314	-31.2859	2.90793	-4.7201	3.45344	3.67331	25.8448	17.6778	-33.1731	-17.9006	14.016	-9.609			-15.2801	-14.5066	-26.5814	-10.2454	-12.4533	-7.82463	10.941	-3.83538	-15.4951	-47.7473	8.48625	-10.7048	-10.8098
2.958	49.7865	-52.8858	-31.4529	2.85641	-4.7558	3.39783	3.58021	25.8419	17.7271	-33.198	-17.9464	13.9904	-9.4803			-15.3695	-14.4605	-26.4612	-10.2763	-12.4352	-7.812	10.9477	-3.88125	-15.5771	-47.853	8.57716	-10.8013	-10.5748
2.96	49.8385	-52.8131	-31.4832	2.8526	-4.84352	3.31033	3.51635	25.7586	17.744	-33.1764	-17.9828	13.9858	-9.36096			-15.4497	-14.545	-26.4302	-10.2822	-12.4231	-7.83429	10.9446	-3.91355	-15.5994	-47.9079	8.63292	-10.8702	-10.4011
2.962	49.8212	-52.8075	-31.4147	2.87776	-4.94539	3.19847	3.45657	25.6565	17.8201	-33.3411	-18.053	13.958	-9.21102			-15.5495	-14.7287	-26.4392	-10.3729	-12.3997	-7.88344	10.9637	-3.95228	-15.6968	-48.0744	8.68802	-10.977	-10.1643
2.964	49.8135	-52.7849	-31.3323	2.90668	-5.01361	3.11307	3.42565	25.5092	17.8707	-33.4085	-18.0945	13.9851	-9.07913			-15.5752	-14.961	-26.4617	-10.4015	-12.3959	-7.92166	10.9645	-3.92904	-15.7797	-48.1871	8.69161	-11.0799	-9.96639
2.966	49.7365	-52.864	-31.2147	2.98788	-5.07791	3.05668	3.4455	25.3914	17.9164	-33.4889	-18.1672	13.9374	-8.93876			-15.5692	-15.1626	-26.4771	-10.461	-12.3643	-7.92586	10.9683	-3.88035	-15.8624	-48.2681	8.59698	-11.1739	-9.75195
2.968	49.643	-52.9772	-31.0909	3.05883	-5.09065	3.03295	3.50109	25.3687	17.9675	-33.5686	-18.2312	13.9316	-8.81675			-15.5361	-15.3429	-26.5162	-10.5418	-12.3169	-7.94387	10.9587	-3.76635	-15.9134	-48.3568	8.56814	-11.2603	-9.53648
2.97	49.6457	-53.0714	-30.9474	3.14944	-5.08963	3.02422	3.57028	25.3484	18.0253	-33.5379	-18.2745	13.8945	-8.6541			-15.4393	-15.4508	-26.5537	-10.6886	-12.3091	-7.94325	10.912	-3.73738	-16.0282	-48.3527	8.48204	-11.4081	-9.27094
2.972	49.7181	-53.1546	-30.7291	3.26635	-5.05217	3.05578	3.63916	25.3104	18.0232	-33.6875	-18.2483	13.9059	-8.46657			-15.3794	-15.5208	-26.6164	-10.9486	-12.3165	-7.94091	10.8672	-3.70986	-16.1375	-48.4781	8.38358	-11.5164	-9.0687
2.974	49.8715	-53.1935	-30.5433	3.3293	-5.029	3.08374	3.66306	25.3299	18.0089	-33.7581	-18.162	13.8684	-8.41586			-15.2612	-15.5215	-26.7444	-11.12	-12.3376	-7.92975	10.8448	-3.67717	-16.215	-48.525	8.41109	-11.6769	-9.04805
2.976	50.0411	-53.2177	-30.3711	3.37768	-4.98238	3.09208	3.67494	25.427	17.9335	-33.8331	-18.068	13.8787	-8.51221			-15.1733	-15.4917	-26.8245	-11.1608	-12.3711	-7.89907	10.8597	-3.70098	-16.2515	-48.6084	8.48303	-11.8717	-9.21806
2.978	50.1908	-53.178	-30.2343	3.51249	-4.93627	3.14034	3.65868	25.5803	17.8918	-33.9119	-18.0541	13.9526	-8.5974			-15.1214	-15.4007	-26.9743	-11.5001	-12.3771	-7.85568	10.8711	-3.72771	-16.1858	-48.692	8.58711	-11.9854	-9.43825
2.98	50.4058	-53.0936	-30.2094	3.58313	-4.90185	3.2227	3.62512	25.6607	17.8422	-34.0214	-18.0274	14.0693	-8.67024			-15.081	-15.3246	-27.161	-11.6741	-12.385	-7.81418	10.8774	-3.80276	-16.208	-48.7992	8.67969	-12.0152	-9.59573
2.982	50.5668	-53.0097	-30.1895	3.65274	-4.93814	3.26626	3.60821	25.703	17.7924	-34.0881	-17.9855	14.1703	-8.75171			-15.1064	-15.2384	-27.2678	-11.7975	-12.3863	-7.8129	10.8836	-3.84262	-16.2202	-48.8919	8.8114	-11.9463	-9.74663
2.984	50.6674	-52.7885	-30.174	3.74233	-4.96642	3.30686	3.54507	25.7755	17.7452	-34.064	-17.987	14.227	-8.8641			-15.098	-15.0315	-27.3339	-11.9312	-12.3622	-7.82747	10.8856	-3.83711	-16.1514	-48.9193	8.95422	-11.8595	-9.91108
2.986	50.7678	-52.5618	-30.1263	3.83958	-5.04042	3.31869	3.48902	25.8225	17.7657	-34.0049	-18.0039	14.0993	-8.92308			-15.0369	-14.8591	-27.2496	-12.0219	-12.3655	-7.84004	10.891	-3.8473	-16.0153	-48.9195	9.06104	-11.7624	-10.0089
2.988	50.7199	-52.3734	-30.0796	3.88748	-5.08368	3.31498	3.42556	25.8135	17.8203	-33.871	-17.9887	13.8764	-8.95229			-15.0332	-14.7496	-27.0196	-12.1286	-12.363	-7.83315	10.9052	-3.81245	-15.8541	-48.8099	9.18281	-11.682	-10.0566
2.99	50.6273	-52.2373	-30.0329	3.95776	-5.13717	3.29794	3.39671	25.758	17.9034	-33.8529	-18.02	13.6767	-8.90659			-15.0461	-14.7919	-26.8055	-12.185	-12.366	-7.84227	10.9219	-3.8065	-15.7449	-48.7683	9.28043	-11.5597	-10.053
2.992	50.5411	-52.1751	-29.9157	4.01722	-5.19842	3.26507	3.36946	25.5672	17.9362	-33.8519	-18.0208	13.5541	-8.81982			-15.0434	-14.9105	-26.6031	-12.2616	-12.4305	-7.85183	10.9356	-3.81713	-15.6592	-48.6205	9.37635	-11.5303	-9.93929
2.994	50.49	-52.2066	-29.7209	4.08975	-5.25199	3.21324	3.40487	25.3979	17.9155	-33.9751	-18.0296	13.4942	-8.8024			-14.9961	-14.9219	-26.5297	-12.3006	-12.4879	-7.89386	10.9245	-3.78861	-15.6681	-48.5678	9.54691	-11.506	-9.8622
2.996	50.3921	-52.3385	-29.5926	4.15506	-5.25437	3.14089	3.47778	25.3103	17.8886	-34.0761	-18.051	13.4293	-8.72353			-14.9411	-14.9786	-26.4812	-12.3489	-12.5629	-7.92771	10.9131	-3.70668	-15.6513	-48.4989	9.72105	-11.4954	-9.86191
2.998	50.3271	-52.5347	-29.5774	4.23903	-5.23487	3.06285	3.57164	25.39	17.8783	-34.119	-18.0751	13.4374	-8.64223			-14.9064	-15.1759	-26.515	-12.427	-12.6283	-7.96237	10.8541	-3.60699	-15.736	-48.5152	9.83144	-11.4942	-9.77213
3	50.3326	-52.6928	-29.657	4.28099	-5.23335	2.97338	3.66502	25.5002	17.8562	-34.1106	-18.1432	13.5729	-8.5506			-14.8979	-15.4466	-26.5902	-12.4479	-12.6823	-7.9898	10.8061	-3.49198	-15.7728	-48.5812	9.85832	-11.4384	-9.64149
3.002	50.3129	-52.8869	-29.8743	4.32558	-5.21832	2.90587	3.72833	25.6301	17.8839	-34.0797	-18.1851	13.8517	-8.4215			-14.9164	-15.5925	-26.6639	-12.4947	-12.6835	-8.02311	10.7769	-3.37425	-15.8505	-48.6479	9.87059	-11.3659	-9.44497
3.004	50.3229	-53.1022	-30.1648	4.34946	-5.25113	2.82311	3.77114	25.7557	17.9148	-34.2638	-18.1844	14.1006	-8.31013			-14.9365	-15.5949	-26.7888	-12.537	-12.6542	-8.06634	10.7791	-3.25968	-16.0259	-48.797	9.83591	-11.3019	-9.24015
3.006	50.3232	-53.2572	-30.3959	4.39116	-5.27615	2.77451	3.74802	25.9082	17.9442	-34.3572	-18.2139	14.2829	-8.0774			-14.9938	-15.5257	-26.8292	-12.5971	-12.6032	-8.13971	10.7815	-3.16571	-16.1396	-48.8989	9.76695	-11.2819	-9.00747
3.008	50.3231	-53.232	-30.4461	4.45287	-5.33131	2.72924	3.72546	26.0516	17.9788	-34.4561	-18.22	14.3386	-7.87716			-15.0053	-15.4785	-26.7972	-12.616	-12.5796	-8.20777	10.7936	-3.08902	-16.2574	-49.0319	9.65411	-11.2887	-8.91708
3.01	50.3544	-53.1145	-30.3962	4.47702	-5.39946	2.74147	3.67858	26.1402	18.0132	-34.4599	-18.2136	14.3127	-7.72232			-15.0143	-15.41	-26.7636	-12.5986	-12.5528	-8.2476	10.7956	-3.09585	-16.3303	-49.0783	9.56442	-11.2312	-8.89036
3.012	50.4586	-52.9371	-30.2526	4.51137	-5.4711	2.7825	3.6665	26.2308	18.0483	-34.6418	-18.0939	14.2005	-7.62362			-14.9649	-15.35	-26.7669	-12.6405	-12.5493	-8.22668	10.7994	-3.10159	-16.4053	-49.2443	9.49439	-11.1781	-8.94831
3.014	50.5872	-52.7949	-30.091	4.55594	-5.55169	2.82344	3.62767	26.2772	18.1026	-34.6463	-17.9055	14.1235	-7.58302			-14.9942	-15.1311	-26.9315	-12.6206	-12.5229	-8.19277	10.8165	-3.16894	-16.5118	-49.2673	9.43517	-11.2075	-8.99291
3.016	50.7696	-52.7308	-29.921	4.55577	-5.57795	2.85949	3.56768	26.3503	18.1525	-34.831	-17.7684	14.0135	-7.64256			-14.969	-14.962	-27.0437	-12.6184	-12.4851	-8.09708	10.8245	-3.16775	-16.5809	-49.4315	9.41753	-11.3219	-8.94881
3.018	50.8985	-52.7168	-29.7194	4.54524	-5.62667	2.85692	3.50896	26.3593	18.1933	-34.9462	-17.6684	13.9302	-7.85021			-14.9501	-14.8796	-27.0767	-12.6258	-12.4339	-7.99183	10.8472	-3.20512	-16.6761	-49.5593	9.36695	-11.5098	-8.8753
3.02	51.0194	-52.7329	-29.5014	4.53656	-5.61873	2.84105	3.4487	26.2999	18.2293	-35.0018	-17.6016	13.8565	-8.05277			-14.9248	-14.8732	-27.0524	-12.6086	-12.4388	-7.92485	10.8795	-3.24177	-16.7758	-49.6431	9.29648	-11.6597	-8.79448
3.022	51.1133	-52.7981	-29.2055	4.56616	-5.6393	2.82605	3.39349	26.15	18.2889	-34.9754	-17.5609	13.8257	-8.18286			-14.8442	-14.8257	-27.0175	-12.591	-12.4673	-7.8881	10.9089	-3.2619	-16.8332	-49.6704	9.21869	-11.8162	-8.69716
3.024	51.2329	-52.887	-29.0626	4.53867	-5.61214	2.86787	3.36018	25.9615	18.2846	-34.8476	-17.5546	13.7391	-8.24104			-14.7271	-14.7526	-26.9685	-12.5331	-12.5027	-7.89047	10.9287	-3.27055	-16.9389	-49.5818	9.14887	-11.9881	-8.63905
3.026	51.2831	-52.9644	-29.0759	4.56445	-5.58999	2.88707	3.386	25.6392	18.3397	-34.7969	-17.5866	13.6911	-8.21106			-14.6231	-14.6925	-26.9579	-12.5234	-12.5318	-7.89575	10.9182	-3.26424	-16.95	-49.5275	9.15135	-12.1173	-8.66289
3.028	51.2387	-53.1071	-29.2051	4.57289	-5.58008	2.87395	3.45547	25.5326	18.3224	-34.7981	-17.6594	13.6679	-8.16641			-14.5221	-14.6909	-26.9702	-12.4546	-12.4991	-7.92588	10.8795	-3.1774	-17.0384	-49.4943	9.17252	-12.2691	-8.76404
3.03	51.1808	-53.2084	-29.4164	4.5765	-5.55313	2.87799	3.52178	25.5096	18.3788	-34.7893	-17.8079	13.6249	-8.09008			-14.4485	-14.8037	-26.9754	-12.4188	-12.4214	-7.95215	10.8123	-3.11013	-17.0653	-49.3169	9.22204	-12.3973	-8.85905
3.032	51.1337	-53.2415	-29.6021	4.58902	-5.58019	2.85223	3.56605	25.5659	18.4005	-34.8073	-17.9614	13.6018	-7.97339			-14.3944	-14.9635	-26.9071	-12.3995	-12.3336	-7.97874	10.7412	-3.03703	-17.1384	-49.1477	9.27504	-12.532	-8.90583
3.034	51.129	-53.246	-29.8285	4.52796	-5.60048	2.8331	3.58282	25.6218	18.4091	-34.8813	-18.1313	13.5553	-7.8199			-14.3263	-15.1577	-26.807	-12.4935	-12.2615	-8.01191	10.6902	-2.95698	-17.2053	-49.106	9.33619	-12.6494	-8.85174
3.036	51.1389	-53.1922	-29.8556	4.43657	-5.59488	2.79034	3.59087	25.6754	18.4694	-34.8684	-18.2247	13.4804	-7.61473			-14.3101	-15.3576	-26.7648	-12.6104	-12.2457	-8.06379	10.7043	-2.81156	-17.2753	-49.1331	9.39387	-12.7532	-8.66877
3.038	51.1718	-53.2105	-29.8226	4.38323	-5.61148	2.71214	3.58334	25.7903	18.5051	-34.8965	-18.3081	13.4316	-7.38938			-14.3814	-15.5928	-26.7668	-12.7502	-12.2717	-8.14292	10.7264	-2.66706	-17.3362	-49.229	9.41234	-12.873	-8.46586
3.04	51.19	-53.2665	-29.727	4.40647	-5.64008	2.63215	3.55764	25.8865	18.529	-34.973	-18.3037	13.4252	-7.12219			-14.4173	-15.9305	-26.7896	-12.8182	-12.3319	-8.2041	10.7517	-2.53975	-17.4456	-49.3433	9.35294	-12.9498	-8.24151
3.042	51.1972	-53.2919	-29.5625	4.35218	-5.64827	2.54573	3.49817	26.0111	18.5534	-35.0524	-18.2052	13.3661	-6.94197			-14.5126	-16.2757	-26.8181	-12.8492	-12.4639	-8.21218	10.7822	-2.40283	-17.513	-49.4324	9.34074	-13.033	-8.13446
3.044	51.1881	-53.3506	-29.3252	4.32608	-5.66187	2.46114	3.43468	25.9465	18.6264	-35.1391	-18.1436	13.3195	-6.73974			-14.5873	-16.4613	-26.8955	-12.9196	-12.6063	-8.19017	10.8231	-2.48193	-17.6	-49.5345	9.36002	-13.176	-8.05941
3.046	51.1774	-53.2729	-29.1979	4.24617	-5.66639	2.37733	3.37239	25.8985	18.6806	-35.2576	-18.0781	13.2827	-6.58379			-14.6222	-16.4365	-27.0298	-12.9234	-12.7269	-8.17468	10.8509	-2.60715	-17.621	-49.6552	9.41984	-13.3195	-8.08492
3.048	51.1251	-53.2288	-29.1817	4.20742	-5.65313	2.34839	3.31164	25.8145	18.7393	-35.4081	-18.0458	13.2333	-6.522			-14.621	-16.2981	-27.2268	-12.9465	-12.7824	-8.15231	10.8755	-2.77155	-17.5877	-49.7848	9.53588	-13.4558	-8.16071
3.05	51.1953	-53.113	-29.1048	4.19874	-5.67091	2.34983	3.29115	25.8056	18.7793	-35.5693	-18.0179	13.1774	-6.54734			-14.5856	-16.1656	-27.4019	-12.943	-12.7396	-8.13646	10.9094	-2.85778	-17.4828	-49.9145	9.61853	-13.5666	-8.21633
3.052	51.2846	-52.9476	-28.9638	4.24852	-5.71729	2.38538	3.31376	25.755	18.8299	-35.7044	-18.0266	13.1435	-6.73211			-14.5569	-16.0629	-27.4238	-12.8876	-12.7058	-8.17725	10.9021	-2.94536	-17.4449	-50.0024	9.71478	-13.7529	-8.21178
3.054	51.4223	-52.8257	-28.8576	4.37265	-5.77426	2.46436	3.37827	25.7354	18.8716	-35.8301	-18.0128	13.1182	-7.01655			-14.5509	-15.8946	-27.3502	-12.8946	-12.6335	-8.246	10.8729	-3.05234	-17.3859	-50.1115	9.82769	-13.9339	-8.16141
3.056	51.5253	-52.7981	-28.8631	4.53214	-5.83621	2.52557	3.47084	25.6803	18.8273	-35.9461	-18.0135	13.1769	-7.22595			-14.5548	-15.6734	-27.1499	-12.9199	-12.5491	-8.29973	10.7967	-3.15136	-17.4155	-50.2065	9.9604	-14.0283	-8.08202
3.058	51.625	-52.8195	-28.7526	4.73666	-5.88172	2.5408	3.52516	25.6893	18.7348	-36.0923	-17.9817	13.2438	-7.26492			-14.5535	-15.4744	-26.89	-13.0398	-12.4575	-8.29269	10.7242	-3.16053	-17.4558	-50.3183	10.0775	-14.0894	-8.12083
3.06	51.6765	-52.8142	-28.5605	4.8832	-5.91514	2.56913	3.59087	25.7415	18.5602	-36.2254	-17.9932	13.3663	-7.16426			-14.5958	-15.4126	-26.7431	-13.1111	-12.3904	-8.21608	10.678	-3.03897	-17.5384	-50.4544	10.1654	-14.0456	-8.20106
3.062	51.7349	-52.8471	-28.4182	5.02039	-5.9298	2.57806	3.60514	25.7859	18.4707	-36.1211	-17.961	13.4785	-7.02533			-14.5608	-15.417	-26.7205	-13.1902	-12.3608	-8.12738	10.6614	-2.88338	-17.547	-50.4202	10.2746	-13.9443	-8.26076
3.064	51.874	-52.9282	-28.3156	5.12565	-5.92703	2.58264	3.60413	25.8248	18.3604	-36.0839	-17.9459	13.5242	-6.86225			-14.5202	-15.3312	-26.7225	-13.2678	-12.3883	-8.03622	10.6664	-2.74589	-17.6068	-50.4064	10.3838	-13.8897	-8.34504
3.066	51.9637	-53.0691	-28.3733	5.23785	-5.89711	2.56508	3.57494	25.8942	18.2839	-36.0214	-17.9559	13.4579	-6.70732			-14.5076	-15.2042	-26.7938	-13.2614	-12.4587	-7.94916	10.6891	-2.62808	-17.7015	-50.3467	10.4902	-13.847	-8.27686
3.068	52.0004	-53.218	-28.5594	5.36427	-5.88801	2.48669	3.54609	25.9795	18.2344	-35.9588	-17.9404	13.3294	-6.56642			-14.4392	-15.1869	-26.9158	-13.2537	-12.5581	-7.94034	10.6956	-2.48363	-17.7082	-50.2448	10.611	-13.8308	-8.17937
3.07	52.0155	-53.3135	-28.9323	5.46382	-5.88365	2.36449	3.49581	26.0665	18.202	-35.9206	-17.9294	13.1469	-6.47122			-14.3939	-15.3843	-27.0704	-13.2699	-12.6567	-7.95693	10.7159	-2.33684	-17.7226	-50.0794	10.7376	-13.8107	-8.08115
3.072	52.03	-53.4398	-29.2165	5.4766	-5.87822	2.25933	3.44756	26.1547	18.2196	-36.0031	-17.9403	12.9617	-6.32472			-14.3741	-15.6338	-27.1314	-13.1681	-12.6774	-7.9864	10.7302	-2.17203	-17.7547	-49.999	10.8421	-13.8859	-7.99441
3.074	52.053	-53.4935	-29.3645	5.46752	-5.92284	2.15886	3.36865	26.258	18.2781	-35.9658	-17.9677	12.7832	-6.2629			-14.3614	-15.7957	-27.0851	-13.0858	-12.6984	-8.01716	10.7627	-1.98582	-17.7652	-49.9122	10.9531	-13.9554	-7.84414
3.076	51.9682	-53.4529	-29.3671	5.54266	-5.97181	2.09545	3.30172	26.4107	18.378	-35.9491	-17.9901	12.682	-6.27574			-14.3713	-15.8301	-26.9293	-13.0755	-12.6569	-8.0928	10.7992	-1.83078	-17.7294	-49.9405	11.0151	-14.0048	-7.66766
3.078	51.9339	-53.4098	-29.2802	5.58232	-6.04923	2.05556	3.23562	26.5234	18.4851	-35.9492	-18.0628	12.5812	-6.3363			-14.3698	-15.7263	-26.9044	-13.0463	-12.6254	-8.18815	10.8417	-1.79341	-17.6358	-50.0099	11.0743	-14.0616	-7.52023
3.08	51.9032	-53.313	-29.0009	5.5922	-6.12907	2.03764	3.19075	26.6282	18.6087	-36.0091	-18.0955	12.5343	-6.38971			-14.3975	-15.6546	-26.9198	-13.0493	-12.5927	-8.23463	10.885	-1.73314	-17.5406	-50.0957	11.0382	-14.0965	-7.48968
3.082	51.9314	-53.2949	-28.6692	5.57746	-6.19045	2.01993	3.1702	26.7039	18.6824	-36.1026	-18.1918	12.5054	-6.39407			-14.4162	-15.65	-27.0097	-13.1254	-12.5625	-8.23841	10.9096	-1.79276	-17.4833	-50.1624	10.9763	-14.0882	-7.5326
3.084	51.9227	-53.2904	-28.3303	5.54086	-6.23356	1.98845	3.2179	26.7636	18.7234	-36.171	-18.2752	12.5401	-6.32944			-14.3807	-15.6231	-27.0957	-13.2673	-12.5294	-8.17194	10.9013	-1.82504	-17.4452	-50.2321	10.9549	-14.1256	-7.62419
3.086	51.9188	-53.3169	-28.1148	5.5309	-6.26765	1.97275	3.27551	26.8098	18.7051	-36.2817	-18.2722	12.6299	-6.24739			-14.3618	-15.5791	-27.2674	-13.3991	-12.5336	-8.06281	10.8547	-1.88881	-17.4084	-50.3278	10.8952	-14.1058	-7.75579
3.088	51.8914	-53.3654	-27.9067	5.46554	-6.29955	1.94445	3.34923	26.7431	18.6571	-36.4083	-18.2167	12.7898	-6.17131			-14.3426	-15.5288	-27.4775	-13.4531	-12.5505	-7.95736	10.7828	-1.92268	-17.4499	-50.45	10.8288	-14.0622	-7.87699
3.09	51.8626	-53.4085	-27.772	5.42196	-6.2515	1.91183	3.37743	26.5853	18.5972	-36.5455	-18.0864	13.0606	-5.98787			-14.3544	-15.5515	-27.6049	-13.5526	-12.5611	-7.88059	10.7095	-1.96183	-17.5162	-50.5469	10.8689	-13.9439	-7.89036
3.092	51.8341	-53.4744	-27.6823	5.36088	-6.25397	1.89239	3.38859	26.3793	18.5764	-36.6566	-18.0158	13.4279	-5.76043			-14.3598	-15.5828	-27.6712	-13.5912	-12.5794	-7.87042	10.6742	-2.03917	-17.5924	-50.6409	10.9416	-13.865	-7.79213
3.094	51.8918	-53.5276	-27.7417	5.31853	-6.20481	1.90617	3.37758	26.1731	18.6167	-36.7716	-17.9268	13.6747	-5.52723			-14.3367	-15.6663	-27.5897	-13.6638	-12.5503	-7.95515	10.6908	-2.09142	-17.67	-50.7072	11.0664	-13.7434	-7.67322
3.096	51.9063	-53.5567	-27.7865	5.22892	-6.14202	1.93309	3.34907	26.0659	18.5824	-36.9156	-17.8605	13.7679	-5.29714			-14.3519	-15.7181	-27.3064	-13.6956	-12.4618	-8.05031	10.7213	-1.98332	-17.7943	-50.7951	11.2083	-13.6238	-7.51477
3.098	51.9434	-53.5778	-27.8783	5.14843	-6.12625	1.93984	3.32501	26.0648	18.6324	-37.0362	-17.8055	13.7399	-5.09908			-14.3495	-15.7815	-26.964	-13.6407	-12.3922	-8.14591	10.7329	-1.86179	-17.9316	-50.8714	11.3217	-13.5397	-7.38739
3.1	51.9843	-53.4755	-27.9491	5.03154	-6.09788	1.91726	3.28405	26.1181	18.6291	-37.1723	-17.7537	13.6652	-4.90918			-14.3724	-15.7795	-26.6805	-13.7166	-12.3814	-8.20399	10.7616	-1.71178	-18.0325	-50.9598	11.4405	-13.5865	-7.25971
3.102	52.0022	-53.3102	-27.8723	5.07534	-6.10576	1.88346	3.21798	26.1501	18.6666	-37.2871	-17.7124	13.6053	-4.70382			-14.3624	-15.8242	-26.6038	-13.6378	-12.3905	-8.22886	10.7791	-1.58134	-18.1009	-51.038	11.5713	-13.6283	-7.1505
3.104	52.0016	-53.2023	-27.7935	5.16202	-6.14349	1.84556	3.13698	26.1596	18.6902	-37.4181	-17.634	13.4869	-4.49376			-14.325	-15.8836	-26.647	-13.4218	-12.4242	-8.18171	10.8245	-1.47717	-18.2244	-51.1284	11.7088	-13.713	-7.02799
3.106	52.0645	-53.1649	-27.8344	5.32602	-6.16843	1.77937	3.09292	26.2182	18.7299	-37.5277	-17.5739	13.4034	-4.39712			-14.3173	-15.9574	-26.7858	-13.6821	-12.4647	-8.12101	10.8652	-1.34876	-18.2747	-51.2065	11.895	-13.7818	-6.86984
3.108	52.142	-53.149	-27.9281	5.60426	-6.22196	1.72094	3.0644	26.3405	18.7311	-37.6661	-17.533	13.285	-4.38931			-14.3058	-15.8983	-27.0191	-13.7525	-12.5614	-8.02418	10.9085	-1.16759	-18.3841	-51.2957	12.0202	-13.8576	-6.73086
3.11	52.2298	-53.1193	-27.9131	5.77814	-6.2811	1.65564	3.07209	26.4544	18.7538	-37.8279	-17.5685	13.2049	-4.4428			-14.2453	-15.7801	-27.4081	-13.7981	-12.6689	-7.91815	10.9311	-0.99456	-18.4502	-51.3877	12.0569	-13.9666	-6.67555
3.112	52.356	-53.1144	-27.8374	5.94516	-6.2845	1.60356	3.13127	26.5214	18.7693	-37.8872	-17.5997	13.1379	-4.51982			-14.2156	-15.8226	-27.6469	-13.7529	-12.7411	-7.84224	10.8981	-0.987924	-18.5081	-51.4196	12.0661	-14.0175	-6.76704
3.114	52.49	-53.0964	-27.7182	6.04156	-6.297	1.5615	3.21	26.6121	18.7919	-37.8015	-17.6493	13.0264	-4.54329			-14.0996	-15.9729	-27.7274	-13.6688	-12.8011	-7.83434	10.8134	-0.993622	-18.5875	-51.3664	12.0488	-14.1359	-6.99712
3.116	52.6014	-53.0875	-27.5768	6.07214	-6.28405	1.39202	3.26645	26.6734	18.8193	-37.6478	-17.748	12.9219	-4.59876			-14.0392	-16.0626	-27.6913	-13.6405	-12.8163	-7.70895	10.7376	-1.05498	-18.6884	-51.2731	12.0158	-14.2951	-7.32386
3.118	52.755	-53.146	-27.5259	6.15406	-6.31782	1.64682	3.27898	26.7073	18.8023	-37.5187	-17.786	12.8621	-4.55123			-13.9718	-16.1607	-27.5153	-13.5825	-12.7773	-7.97138	10.6816	-1.23536	-18.7621	-51.186	12.0103	-14.3875	-7.6145
3.12	53.0376	-53.2133	-27.4892	6.20806	-6.37213	1.70692	3.29865	26.7264	18.8411	-37.3693	-17.7846	12.7613	-4.44595			-13.9097	-16.3724	-27.2513	-13.593	-12.7199	-8.03104	10.6707	-1.39086	-18.8815	-51.1151	11.9404	-14.524	-7.74255
3.122	53.2384	-53.365	-27.387	6.16336	-6.43245	1.70257	3.2843	26.7784	18.8304	-37.2295	-17.7463	12.6864	-4.46519			-13.8396	-16.5011	-26.9802	-13.6095	-12.6748	-8.07121	10.69	-1.56254	-18.9842	-51.0495	11.8666	-14.5898	-7.73276
3.124	53.388	-53.5426	-27.2766	6.04516	-6.53306	1.69175	3.24853	26.7719	18.8373	-37.2317	-17.6162	12.613	-4.45326			-13.8163	-16.5834	-26.8143	-13.7451	-12.6433	-8.04948	10.7111	-1.68302	-19.0299	-51.0389	11.8835	-14.7148	-7.65773
3.126	53.4137	-53.7356	-27.1835	5.93246	-6.63099	1.65997	3.19015	26.6923	18.8746	-37.31	-17.482	12.5493	-4.43922			-13.8488	-16.6968	-26.8318	-13.8246	-12.6156	-8.01025	10.7375	-1.75109	-19.1127	-51.039	11.9985	-14.8411	-7.54845
3.128	53.3295	-53.8881	-27.2511	5.87852	-6.70586	1.64016	3.12771	26.6153	18.9071	-37.4061	-17.4148	12.4435	-4.30923			-13.9666	-16.7243	-26.968	-13.8917	-12.557	-7.92869	10.7778	-1.72641	-19.2281	-51.0874	12.0957	-14.9709	-7.44493
3.13	53.2676	-54.0113	-27.471	5.80108	-6.73505	1.62	3.0864	26.6021	18.9154	-37.5274	-17.3087	12.3735	-4.14032			-14.0891	-16.5594	-27.1777	-13.9965	-12.5167	-7.83884	10.8231	-1.58766	-19.3646	-51.1323	12.2115	-15.0781	-7.35076
3.132	53.2571	-54.1705	-27.7411	5.70508	-6.71868	1.55642	3.04765	26.5955	18.9536	-37.6663	-17.2246	12.2799	-3.99024			-14.1617	-16.3575	-27.3316	-14.0547	-12.4909	-7.78995	10.8688	-1.47804	-19.4326	-51.1893	12.3168	-15.1491	-7.23646
3.134	53.2027	-54.3169	-27.9586	5.69297	-6.66817	1.44476	2.99974	26.648	18.9685	-37.8984	-17.1315	12.2218	-3.86341			-14.247	-16.1861	-27.4834	-14.0597	-12.485	-7.77277	10.8926	-1.28677	-19.5643	-51.279	12.4049	-15.2892	-7.11908
3.136	53.1966	-54.395	-28.0563	5.7545	-6.62572	1.32609	2.99628	26.6706	19.0491	-38.0165	-17.0591	12.1445	-3.73065			-14.289	-16.227	-27.515	-14.0079	-12.4899	-7.74669	10.8951	-1.10417	-19.6562	-51.335	12.5092	-15.3328	-6.99024
3.138	53.1488	-54.4267	-28.0388	5.87989	-6.58634	1.22503	3.0632	26.6732	19.1192	-38.1396	-16.9887	12.1061	-3.67975			-14.2706	-16.2104	-27.4946	-13.9581	-12.5457	-7.71431	10.8581	-0.97461	-19.6675	-51.3812	12.6006	-15.3904	-6.80012
3.14	53.131	-54.4312	-28.0056	6.0688	-6.53199	1.19638	3.15608	26.7012	19.1454	-38.2382	-16.8917	12.0514	-3.66345			-14.2345	-16.1388	-27.4	-14.0313	-12.572	-7.70081	10.7809	-0.859404	-19.6226	-51.4403	12.726	-15.4719	-6.61083
3.142	53.1659	-54.2692	-27.8892	6.22044	-6.48081	1.19113	3.20706	26.7258	19.1834	-38.36	-16.8494	11.9605	-3.68045			-14.1955	-16.1009	-27.3235	-14.0964	-12.5898	-7.71184	10.699	-0.656166	-19.5693	-51.5055	12.8349	-15.5707	-6.4694
3.144	53.2315	-54.1464	-27.7417	6.36948	-6.4605	1.24335	3.24415	26.736	19.2421	-38.4496	-16.8835	11.8949	-3.66036			-14.1426	-16.0021	-27.2949	-14.1345	-12.598	-7.74003	10.629	-0.446264	-19.4926	-51.571	12.8951	-15.668	-6.34949
3.146	53.3294	-54.0135	-27.5722	6.46985	-6.51084	1.31209	3.25364	26.8145	19.1874	-38.5765	-16.9643	11.8245	-3.62067			-14.0829	-15.9363	-27.1996	-14.2316	-12.5898	-7.79268	10.5864	-0.280406	-19.4439	-51.6378	12.8596	-15.7562	-6.40109
3.148	53.4309	-53.8707	-27.339	6.58073	-6.57937	1.38104	3.25388	26.8356	19.0271	-38.6453	-17.0136	11.7527	-3.53961			-14.018	-15.8124	-27.1635	-14.3241	-12.6107	-7.8337	10.5928	-0.05439	-19.3951	-51.7139	12.8396	-15.8665	-6.67002
3.15	53.5539	-53.8021	-27.1345	6.66281	-6.64938	1.43192	3.23634	26.9203	18.8751	-38.6521	-17.037	11.6732	-3.49013			-13.9316	-15.59	-27.0811	-14.4166	-12.6052	-7.82296	10.6192	0.055314	-19.3538	-51.7837	12.7997	-15.9856	-6.90539
3.152	53.6468	-53.8149	-27.0526	6.77397	-6.73708	1.40144	3.19362	27.0155	18.7261	-38.6205	-17.061	11.5803	-3.37645			-13.87	-15.3905	-27.0511	-14.4848	-12.6188	-7.78564	10.6536	0.145152	-19.4173	-51.8143	12.62	-16.1402	-7.10531
3.154	53.7645	-53.8227	-27.0363	6.83424	-6.81297	1.32258	3.12581	27.0554	18.62	-38.6005	-16.9789	11.4977	-3.29503			-13.7941	-15.136	-27.0764	-14.5389	-12.6163	-7.77144	10.6874	0.143654	-19.4912	-51.855	12.4593	-16.2501	-7.28332
3.156	53.8678	-53.8147	-27.2193	6.88401	-6.89836	1.22436	3.06359	27.103	18.5492	-38.5034	-16.8828	11.4492	-3.21296			-13.7114	-14.8592	-27.1682	-14.6229	-12.7061	-7.73311	10.7338	0.125706	-19.5198	-51.8018	12.3953	-16.3534	-7.30132
3.158	53.9878	-53.852	-27.5041	6.94964	-6.92937	1.12511	3.03647	27.0812	18.5243	-38.4823	-16.7583	11.4532	-3.16282			-13.6101	-14.6776	-27.288	-14.6842	-12.7532	-7.67862	10.7633	0.059836	-19.5307	-51.7635	12.3422	-16.4782	-7.21671
3.16	54.0999	-53.8775	-27.8084	7.00049	-6.92885	1.07205	3.01899	27.0421	18.5323	-38.5399	-16.6927	11.5012	-3.05092			-13.5486	-14.6218	-27.3898	-14.7437	-12.821	-7.65729	10.7902	-0.03101	-19.5435	-51.7615	12.2741	-16.5527	-7.06845
3.162	54.2613	-53.8808	-28.0096	7.00624	-6.91428	1.00545	3.01223	26.9925	18.5948	-38.56	-16.646	11.5534	-2.97196			-13.4343	-14.6132	-27.3396	-14.7737	-12.8577	-7.66097	10.7844	-0.111664	-19.5373	-51.6941	12.2133	-16.5824	-6.85899
3.164	54.3915	-53.9217	-28.0784	6.98747	-6.91074	0.934822	3.03625	26.8769	18.6388	-38.6587	-16.7062	11.6457	-3.00812			-13.327	-14.6816	-27.2758	-14.7879	-12.8702	-7.6615	10.7093	-0.245588	-19.5919	-51.646	12.182	-16.5355	-6.65073
3.166	54.5822	-53.8961	-27.9837	6.9631	-6.9285	0.869064	3.07915	26.7082	18.6469	-38.7831	-16.8136	11.6551	-3.12959			-13.2314	-14.8066	-27.2282	-14.8307	-12.8403	-7.63801	10.6409	-0.349216	-19.6155	-51.602	12.1643	-16.4603	-6.50556
3.168	54.7609	-53.8252	-27.7824	6.89454	-6.97337	0.790398	3.13333	26.6301	18.6684	-38.8327	-16.9768	11.5166	-3.23378			-13.0988	-14.9486	-27.2682	-14.8597	-12.8017	-7.62423	10.5753	-0.322686	-19.6807	-51.542	12.1628	-16.3099	-6.40213
3.17	54.959	-53.691	-27.4679	6.79178	-7.08343	0.717332	3.17031	26.6296	18.7003	-39.0035	-17.2039	11.3889	-3.25791			-12.972	-15.0287	-27.3959	-14.8222	-12.7629	-7.56834	10.5249	-0.220262	-19.7474	-51.5068	12.1947	-16.0841	-6.37755
3.172	55.1876	-53.5873	-27.1282	6.71986	-7.15214	0.697942	3.1592	26.6471	18.7667	-39.0553	-17.3086	11.2375	-3.22815			-12.8364	-15.0755	-27.5255	-14.7793	-12.6995	-7.55336	10.4915	-0.113862	-19.824	-51.4643	12.2817	-16.0246	-6.45882
3.174	55.3551	-53.5005	-26.7816	6.65445	-7.20994	0.707014	3.13041	26.6252	18.8215	-39.1084	-17.4034	11.1315	-3.12257			-12.7648	-15.1033	-27.6925	-14.6251	-12.5951	-7.56039	10.5286	0.02905	-19.9341	-51.4476	12.3248	-16.0053	-6.63795
3.176	55.4889	-53.4817	-26.529	6.7717	-7.2352	0.746438	3.07952	26.6298	18.9547	-39.1375	-17.3862	11.0779	-3.06551			-12.7152	-15.1021	-27.8835	-14.4763	-12.538	-7.60173	10.5952	0.117992	-19.9936	-51.5346	12.2815	-16.0043	-6.9347
3.178	55.5884	-53.4606	-26.3349	6.93595	-7.23806	0.79954	3.02651	26.588	19.0447	-39.1196	-17.3136	11.0276	-3.03524			-12.7512	-15.0344	-28.081	-14.3031	-12.5022	-7.66172	10.6424	0.195678	-19.979	-51.685	12.2534	-15.9924	-7.22861
3.18	55.6613	-53.4231	-26.283	7.07812	-7.21616	0.839202	2.97926	26.619	19.119	-39.0826	-17.2085	11.0154	-2.93313			-12.7844	-14.8762	-28.2075	-14.2207	-12.4917	-7.70003	10.7102	0.119084	-19.8645	-51.7912	12.2928	-15.9785	-7.39053
3.182	55.6596	-53.3891	-26.435	7.18011	-7.18729	0.863772	2.9335	26.7067	19.1985	-39.0424	-17.141	11.0922	-2.82927			-12.8064	-14.7761	-28.0893	-14.1902	-12.4639	-7.66955	10.7673	-0.01596	-19.7981	-51.8902	12.3501	-15.9938	-7.43371
3.184	55.6536	-53.3926	-26.6108	7.22707	-7.14435	0.865704	2.92466	26.8237	19.2253	-39.0275	-17.0458	11.1985	-2.82274			-12.8076	-14.7834	-27.863	-14.308	-12.5466	-7.62065	10.8172	-0.171906	-19.794	-51.9466	12.4487	-16.0063	-7.39582
3.186	55.5615	-53.3857	-26.7513	7.25854	-7.12839	0.882014	2.90182	27.0845	19.1747	-38.9085	-16.9785	11.4273	-2.83067			-12.7782	-14.7836	-27.455	-14.4718	-12.6566	-7.58068	10.8579	-0.2555	-19.7429	-51.861	12.5247	-16.0083	-7.31181
3.188	55.4258	-53.4138	-26.8706	7.23862	-7.11105	0.84777	2.92282	27.1979	19.1145	-38.8454	-16.8709	11.5772	-2.8586			-12.6577	-14.8607	-27.1861	-14.6214	-12.7084	-7.54159	10.8321	-0.2772	-19.7197	-51.7534	12.5778	-16.0582	-7.2127
3.19	55.3725	-53.4659	-26.9889	7.21356	-7.07613	0.783832	3.00626	27.1926	19.0499	-38.9567	-16.8209	11.7575	-2.73764			-12.519	-15.003	-27.067	-14.7678	-12.7192	-7.5108	10.747	-0.252098	-19.7834	-51.737	12.6538	-16.0967	-7.08422
3.192	55.3556	-53.5507	-27.0729	7.18729	-7.07336	0.713132	3.06996	27.1507	19.024	-38.9513	-16.7151	11.8262	-2.57771			-12.4194	-15.1878	-27.1229	-14.847	-12.7162	-7.4807	10.6452	-0.244104	-19.8585	-51.6951	12.7226	-16.1287	-6.95542
3.194	55.369	-53.6902	-27.1985	7.12338	-7.11306	0.610442	3.08137	27.123	18.9809	-39.0798	-16.6444	11.8413	-2.3977			-12.3694	-15.3711	-27.1785	-14.9156	-12.6473	-7.48003	10.5739	-0.23646	-19.9868	-51.7267	12.8095	-16.1017	-6.80289
3.196	55.5053	-53.7763	-27.2422	7.06584	-7.18715	0.509404	3.09457	27.0394	18.9966	-39.2211	-16.5412	11.8338	-2.20493			-12.3477	-15.5098	-27.2544	-14.9582	-12.6161	-7.50428	10.5274	-0.053984	-20.1306	-51.7705	12.8806	-15.9755	-6.64195
3.198	55.7181	-53.8357	-27.1118	6.97796	-7.25595	0.436408	3.08494	27.0095	19.0155	-39.3923	-16.4336	11.8008	-1.9957			-12.3057	-15.5917	-27.3986	-14.9866	-12.5716	-7.5565	10.5258	0.14392	-20.2665	-51.8045	12.9896	-15.9003	-6.4412
3.2	55.9484	-53.8447	-26.9828	6.95213	-7.35832	0.365134	3.05725	27.0027	19.0277	-39.5485	-16.3694	11.6887	-1.70069			-12.158	-15.6606	-27.5003	-14.979	-12.5415	-7.61779	10.5545	0.251286	-20.3964	-51.8159	13.0934	-15.9258	-6.22815
3.202	56.2001	-53.7985	-26.8484	7.01026	-7.40529	0.290752	3.0406	26.9942	19.0587	-39.7824	-16.2934	11.5488	-1.48989			-12.0016	-15.6047	-27.5097	-14.9075	-12.5695	-7.6825	10.5858	0.393778	-20.5062	-51.8549	13.1875	-16.0451	-6.01408
3.204	56.4383	-53.7641	-26.7179	7.17228	-7.41353	0.246428	2.99789	26.9927	19.0883	-39.9396	-16.2082	11.4236	-1.41635			-11.8686	-15.5813	-27.5023	-14.7911	-12.5824	-7.72934	10.6186	0.525812	-20.6222	-51.8827	13.2837	-16.1785	-5.91683
3.206	56.6442	-53.7033	-26.5746	7.38998	-7.40597	0.222264	2.93885	27.0043	19.0968	-40.1067	-16.0954	11.3	-1.49281			-11.7862	-15.5503	-27.5313	-14.6916	-12.5968	-7.74522	10.6677	0.707378	-20.7545	-51.9137	13.3781	-16.2775	-5.95312
3.208	56.7685	-53.7243	-26.4268	7.51248	-7.37702	0.248794	2.89436	27.0118	19.1156	-40.2615	-16.0283	11.1806	-1.65054			-11.7174	-15.5172	-27.5726	-14.6134	-12.6241	-7.69549	10.7221	0.81557	-20.839	-51.9412	13.4845	-16.4289	-6.06686
3.21	56.8256	-53.7736	-26.2524	7.59178	-7.32256	0.342384	2.85786	27.0006	19.0988	-40.3078	-16.0168	11.049	-1.79021			-11.7579	-15.4564	-27.6213	-14.5111	-12.5654	-7.57449	10.7499	0.93072	-20.9334	-51.9545	13.6073	-16.5658	-6.19567
3.212	56.8929	-53.7616	-26.054	7.66963	-7.27975	0.412734	2.84376	27.0036	19.0989	-40.5572	-16.0786	10.9514	-2.0337			-11.847	-15.4118	-27.6127	-14.4532	-12.5029	-7.44899	10.7731	1.11283	-21.0467	-51.9817	13.6379	-16.7047	-6.30101
3.214	56.923	-53.7747	-25.9592	7.70592	-7.25432	0.399728	2.86954	27.0202	19.1206	-40.7205	-16.1497	10.8448	-2.29744			-11.9191	-15.4264	-27.531	-14.4951	-12.4343	-7.36257	10.7132	1.28451	-21.1316	-52.0217	13.6676	-16.8022	-6.39415
3.216	56.8807	-53.7881	-25.8793	7.68249	-7.22592	0.392728	2.92085	27.0824	19.135	-40.7885	-16.2366	10.7703	-2.4694			-11.9644	-15.4559	-27.477	-14.6155	-12.4374	-7.31655	10.6263	1.36179	-21.2501	-52.1	13.7127	-16.8803	-6.45655
3.218	56.77	-53.8092	-25.8534	7.71705	-7.23989	0.375354	2.96324	27.1215	19.1425	-40.7634	-16.3157	10.6406	-2.5639			-12.0068	-15.5153	-27.4514	-14.8181	-12.4495	-7.33814	10.5399	1.46868	-21.3983	-52.1475	13.7568	-16.9798	-6.53279
3.22	56.6252	-53.8305	-25.9567	7.81295	-7.26228	0.370118	2.98346	27.2118	19.1752	-40.739	-16.3415	10.5577	-2.571			-11.9058	-15.5208	-27.4368	-15.0012	-12.4774	-7.37012	10.466	1.4951	-21.5087	-52.1705	13.7249	-17.0321	-6.62638
3.222	56.557	-53.8354	-26.1779	7.85886	-7.29371	0.372904	2.9728	27.2825	19.2013	-40.6902	-16.2511	10.4712	-2.55268			-11.7552	-15.5587	-27.4366	-15.1605	-12.467	-7.4122	10.449	1.47577	-21.6411	-52.188	13.6462	-17.1538	-6.69129
3.224	56.6024	-53.832	-26.4054	7.87562	-7.32631	0.321916	2.94911	27.2551	19.2357	-40.6226	-16.1399	10.3856	-2.51846			-11.6646	-15.519	-27.5069	-15.219	-12.4952	-7.47373	10.4685	1.42678	-21.7635	-52.1182	13.5398	-17.2448	-6.67072
3.226	56.7005	-53.8518	-26.6909	7.83006	-7.36473	0.271628	2.89818	27.1794	19.3102	-40.5832	-16.0391	10.3141	-2.4262			-11.6052	-15.5558	-27.663	-15.2798	-12.5181	-7.55261	10.4955	1.37025	-21.8315	-51.9799	13.4735	-17.3119	-6.63229
3.228	56.8675	-53.8468	-26.8452	7.81673	-7.42773	0.251188	2.8558	27.0782	19.3281	-40.5665	-15.9108	10.1885	-2.32113			-11.5259	-15.6167	-27.7756	-15.3729	-12.583	-7.65919	10.5154	1.2242	-21.8007	-51.8515	13.4068	-17.445	-6.594
3.23	57.0782	-53.8864	-26.8192	7.77151	-7.4789	0.221284	2.81236	26.9077	19.3136	-40.5966	-15.7772	10.0998	-2.16905			-11.4405	-15.6489	-27.8512	-15.4341	-12.637	-7.70988	10.5512	1.11528	-21.7556	-51.7613	13.4066	-17.5285	-6.49173
3.232	57.2766	-53.9225	-26.7424	7.72542	-7.467	0.211246	2.74238	26.7697	19.3336	-40.6206	-15.7177	10.0053	-1.93802			-11.3058	-15.7	-27.8582	-15.4156	-12.7226	-7.67794	10.6085	1.18754	-21.6615	-51.7211	13.3614	-17.5984	-6.45084
3.234	57.5083	-53.9658	-26.6214	7.67024	-7.48689	0.234066	2.68873	26.6954	19.3623	-40.62	-15.6572	9.95501	-1.68269			-11.1633	-15.7569	-27.7891	-15.392	-12.7499	-7.5374	10.6628	1.33155	-21.5808	-51.7583	13.2991	-17.6521	-6.50192
3.236	57.7369	-54.0097	-26.4681	7.70008	-7.49062	0.207746	2.68226	26.68	19.1739	-40.6684	-15.5924	9.87942	-1.51432			-10.9929	-15.8451	-27.6913	-15.3679	-12.743	-7.40272	10.697	1.48345	-21.5377	-51.8385	13.2576	-17.7499	-6.58218
3.238	57.9401	-54.0299	-26.2966	7.74677	-7.49899	0.171052	2.6866	26.6388	19.0356	-40.8001	-15.5769	9.78888	-1.43779			-10.8612	-15.9755	-27.6936	-15.2359	-12.7175	-7.29861	10.7155	1.52963	-21.4791	-51.8744	13.2165	-17.8277	-6.66326
3.24	58.094	-53.999	-26.0526	7.8562	-7.52965	0.12418	2.75292	26.5927	18.9051	-40.9311	-15.6866	9.69431	-1.45459			-10.7848	-16.1389	-27.7508	-15.0819	-12.6402	-7.25256	10.6602	1.63062	-21.4729	-51.8894	13.3217	-17.9041	-6.6311
3.242	58.1732	-53.9859	-25.8015	7.99512	-7.58659	0.088956	2.80687	26.5993	18.7986	-41.1114	-15.8705	9.59648	-1.58017			-10.7806	-16.2729	-27.7822	-14.8975	-12.5946	-7.31518	10.5759	1.65382	-21.5648	-51.9061	13.4414	-18.0275	-6.53769
3.244	58.2027	-53.9674	-25.6661	8.11352	-7.65933	0.083118	2.85424	26.6506	18.7484	-41.245	-15.9622	9.50173	-1.72718			-10.8272	-16.4391	-27.8448	-14.7732	-12.5665	-7.40998	10.4972	1.57888	-21.6469	-51.9903	13.6522	-18.1238	-6.43455
3.246	58.1674	-53.9756	-25.6428	8.17125	-7.70795	0.105742	2.88805	26.8268	18.722	-41.351	-16.0269	9.39704	-1.91428			-10.8961	-16.5523	-27.817	-14.8277	-12.5197	-7.52469	10.4243	1.41137	-21.6097	-52.0877	13.8072	-18.2444	-6.28256
3.248	58.1083	-53.918	-25.6884	8.16026	-7.78082	0.114786	2.91623	26.9617	18.7403	-41.3836	-16.094	9.36519	-1.9718			-11.005	-16.7168	-27.824	-14.9805	-12.53	-7.62044	10.36	1.28799	-21.6067	-52.183	13.776	-18.3212	-6.1908
3.25	57.9902	-53.8042	-25.8834	8.15248	-7.82468	0.086548	2.90766	27.1522	18.8037	-41.3507	-16.0899	9.36401	-2.00617			-11.0255	-16.7387	-27.8438	-15.1409	-12.5133	-7.64081	10.352	1.2446	-21.6347	-52.2178	13.7239	-18.4181	-6.15584
3.252	57.8364	-53.714	-26.2093	8.27239	-7.86075	0.083202	2.86002	27.2577	18.8295	-41.2862	-16.0393	9.37679	-2.01286			-10.9835	-16.6311	-27.8755	-15.3634	-12.5255	-7.5892	10.3745	1.31025	-21.6873	-52.208	13.6753	-18.5062	-6.25026
3.254	57.7692	-53.7201	-26.5532	8.35251	-7.88218	0.050722	2.81408	27.2613	18.9305	-41.2151	-15.9223	9.41648	-1.99856			-10.8667	-16.5946	-27.9199	-15.5178	-12.5677	-7.50908	10.4044	1.29676	-21.7487	-52.1033	13.6861	-18.4909	-6.41819
3.256	57.8481	-53.7634	-26.8451	8.43758	-7.8923	0.020832	2.77729	27.2515	19.02	-41.178	-15.7682	9.47155	-1.96001			-10.7809	-16.6323	-27.8582	-15.7062	-12.6191	-7.37995	10.4371	1.30838	-21.7095	-51.9671	13.683	-18.341	-6.46129
3.258	58.0187	-53.8138	-26.9064	8.5141	-7.88276	-0.00651	2.70851	27.2198	19.1515	-41.1976	-15.6487	9.5465	-1.84226			-10.717	-16.7119	-27.7861	-15.8411	-12.6774	-7.2547	10.483	1.24106	-21.6592	-51.857	13.6873	-18.1072	-6.43615
3.26	58.245	-53.8275	-26.8569	8.5975	-7.88148	-0.037884	2.64319	27.105	19.2374	-41.2404	-15.531	9.57075	-1.63579			-10.571	-16.7578	-27.7885	-15.9401	-12.7102	-7.16006	10.5206	1.27764	-21.6126	-51.7839	13.7202	-17.8392	-6.32967
3.262	58.49	-53.8202	-26.7688	8.67103	-7.89051	-0.092008	2.60872	27.02	19.2896	-41.2399	-15.3833	9.54579	-1.48091			-10.4306	-16.8537	-27.8665	-16.0354	-12.6935	-7.12636	10.5836	1.35834	-21.6126	-51.7847	13.7487	-17.5822	-6.17658
3.264	58.6355	-53.8353	-26.6579	8.71808	-7.91175	-0.12327	2.59413	26.9355	19.2659	-41.2407	-15.2634	9.50271	-1.24058			-10.2576	-16.8844	-27.9256	-16.128	-12.6486	-7.20322	10.6278	1.49015	-21.5635	-51.8526	13.7845	-17.4601	-6.0541
3.266	58.7864	-53.8261	-26.5552	8.79271	-7.95714	-0.122192	2.61796	26.8605	19.1655	-41.3234	-15.1457	9.53327	-0.944356			-10.0986	-16.9159	-27.9867	-16.2448	-12.5642	-7.30597	10.6446	1.65091	-21.5487	-51.8921	13.796	-17.462	-6.02694
3.268	59.0147	-53.8547	-26.4148	8.83214	-8.00339	-0.083524	2.69734	26.7862	19.0827	-41.4554	-15.0221	9.61902	-0.744016			-9.93425	-17.0241	-28.0576	-16.3489	-12.4706	-7.41783	10.5932	1.79159	-21.5828	-51.9397	13.8129	-17.4239	-6.02328
3.27	59.2271	-53.9287	-26.3019	8.90281	-8.02024	-0.070014	2.77773	26.697	19.0662	-41.6264	-14.8901	9.70131	-0.611212			-9.70269	-17.0928	-28.1018	-16.4502	-12.4156	-7.4769	10.5025	2.01278	-21.6834	-51.9672	13.8499	-17.4459	-6.08084
3.272	59.3949	-53.9615	-26.1136	8.97302	-7.99842	-0.039228	2.8322	26.6193	19.08	-41.7741	-14.7618	9.78186	-0.539126			-9.61272	-17.0569	-28.1957	-16.5087	-12.3639	-7.47331	10.406	2.18985	-21.8247	-51.9801	13.889	-17.4935	-6.11989
3.274	59.5271	-54.0131	-25.947	9.04721	-7.98088	-0.033068	2.8404	26.5068	19.0878	-41.9507	-14.6674	9.78279	-0.61215			-9.59769	-16.9941	-28.2877	-16.4882	-12.285	-7.40349	10.3482	2.38794	-21.9727	-52.0082	13.9308	-17.5698	-6.13508
3.276	59.5653	-54.0905	-25.7667	9.10363	-7.98312	-0.047166	2.82283	26.5239	19.0834	-42.1189	-14.5223	9.73935	-0.770476			-9.58157	-16.9538	-28.3851	-16.3873	-12.2608	-7.2885	10.3203	2.46207	-22.0822	-52.0725	13.9593	-17.6188	-6.07051
3.278	59.5818	-54.137	-25.6506	9.05453	-8.005	-0.074984	2.80776	26.5843	19.0997	-42.2001	-14.4912	9.66645	-0.987322			-9.64695	-16.9184	-28.4224	-16.2483	-12.3516	-7.165	10.3262	2.55384	-22.2089	-52.1695	14.0377	-17.7503	-5.95995
3.28	59.5194	-54.1327	-25.4835	9.05005	-7.98798	-0.109648	2.79356	26.6305	19.1209	-42.2041	-14.5012	9.61128	-1.15116			-9.74966	-16.9157	-28.4366	-16.122	-12.4758	-7.05348	10.3379	2.54241	-22.2586	-52.2386	14.1272	-17.8143	-5.87789
3.282	59.3678	-54.1224	-25.296	8.94631	-7.99001	-0.146048	2.77102	26.6755	19.1487	-42.1797	-14.5508	9.54887	-1.21465			-9.81159	-16.9521	-28.3578	-16.094	-12.5722	-7.0042	10.3599	2.56518	-22.333	-52.2834	14.1801	-17.9179	-5.80422
3.284	59.1384	-54.0925	-25.1972	8.78623	-7.9948	-0.185542	2.7292	26.7253	19.1642	-42.1178	-14.5671	9.47478	-1.20614			-9.80157	-17.0065	-28.2763	-16.1207	-12.6706	-7.02122	10.4004	2.55437	-22.4303	-52.2831	14.2589	-18.0571	-5.84665
3.286	59.0181	-54.0781	-25.1388	8.65316	-7.9833	-0.186088	2.66202	26.6546	19.1642	-42.0527	-14.6278	9.39499	-1.21475			-9.6607	-17.0547	-28.212	-16.2051	-12.6808	-7.1078	10.4625	2.49519	-22.5217	-52.2012	14.2662	-18.1538	-5.94686
3.288	59.0181	-54.062	-25.0952	8.535	-8.0166	-0.164934	2.63431	26.5845	19.1944	-41.9846	-14.7166	9.33923	-1.20581			-9.65748	-17.1732	-28.2099	-16.3188	-12.6197	-7.20664	10.5128	2.40426	-22.5971	-52.0516	14.2165	-18.2704	-6.02452
3.29	59.2131	-54.0632	-25.1096	8.50293	-8.05917	-0.167468	2.61342	26.4627	19.1859	-41.8768	-14.679	9.28189	-1.19447			-9.57908	-17.375	-28.1485	-16.3699	-12.577	-7.29522	10.5635	2.26034	-22.6849	-51.9068	14.1276	-18.3576	-6.11632
3.292	59.4392	-54.066	-25.2106	8.45181	-8.10977	-0.15099	2.60214	26.3233	19.1609	-41.9452	-14.5323	9.17764	-1.08668			-9.44069	-17.5263	-28.2059	-16.2834	-12.5347	-7.31315	10.5871	2.12933	-22.8096	-51.8703	14.0302	-18.497	-6.06791
3.294	59.6631	-54.0794	-25.3769	8.45849	-8.22447	-0.121856	2.62895	26.2307	19.1553	-41.9442	-14.4094	9.09427	-1.01731			-9.25221	-17.618	-28.2789	-16.2208	-12.4436	-7.26603	10.6005	2.1271	-22.8719	-51.9044	13.9447	-18.6221	-6.02692
3.296	59.9248	-54.08	-25.4724	8.52727	-8.26773	-0.133322	2.71909	26.1108	19.1516	-42.0147	-14.3052	9.04484	-0.912212			-9.09009	-17.7084	-28.5046	-16.1746	-12.3882	-7.19506	10.5413	2.17854	-22.9929	-51.9328	13.8815	-18.6748	-5.95176
3.298	60.1311	-54.1155	-25.6146	8.65035	-8.30143	-0.169946	2.76755	26.0601	19.1614	-42.1344	-14.2161	8.97284	-0.796992			-8.91927	-17.9188	-28.695	-16.0798	-12.3206	-7.13118	10.4481	2.28637	-23.1133	-51.9841	13.8136	-18.8313	-5.87716
3.3	60.3389	-54.158	-25.7327	8.81721	-8.31918	-0.195454	2.78222	25.9955	19.2182	-42.2752	-14.1101	8.9203	-0.654514			-8.71128	-18.1698	-28.8453	-16.0431	-12.3353	-7.04386	10.3733	2.33636	-23.2053	-52.0157	13.7416	-18.8897	-5.78253
3.302	60.5533	-54.2232	-25.7189	8.99998	-8.32447	-0.264222	2.77504	25.917	19.2663	-42.336	-14.0285	8.82602	-0.491568			-8.54841	-18.4535	-28.9326	-16.0268	-12.3211	-6.95506	10.3081	2.45868	-23.263	-52.0596	13.7234	-19.018	-5.69386
3.304	60.6732	-54.319	-25.6094	9.17015	-8.29294	-0.322294	2.7726	25.8747	19.3404	-42.5223	-14.0158	8.74968	-0.353304			-8.37675	-18.749	-28.9174	-16.0241	-12.3655	-6.86272	10.3013	2.57578	-23.2517	-52.0841	13.6759	-19.1393	-5.62995
3.306	60.7901	-54.3471	-25.4949	9.31841	-8.2517	-0.378	2.75927	25.8977	19.3667	-42.6982	-14.0787	8.68223	-0.210112			-8.31523	-19.0753	-28.8598	-16.0251	-12.3754	-6.80609	10.3151	2.61912	-23.1337	-52.1482	13.6695	-19.1813	-5.55366
3.308	60.8812	-54.3882	-25.3098	9.45132	-8.21776	-0.406056	2.73325	25.9287	19.4366	-42.8454	-14.1862	8.57256	-0.03885			-8.35505	-19.4171	-28.8536	-16.0237	-12.3479	-6.7991	10.3248	2.60852	-23.047	-52.2519	13.6865	-19.2778	-5.45339
3.31	60.9332	-54.438	-25.1052	9.47615	-8.17159	-0.410452	2.69438	26.0752	19.4853	-42.9419	-14.2754	8.54395	0.108556			-8.36311	-19.8133	-28.836	-16.0005	-12.2963	-6.83486	10.3447	2.52738	-23.0097	-52.3548	13.7052	-19.3804	-5.38013
3.312	60.9115	-54.5465	-24.8978	9.5282	-8.13449	-0.372974	2.64593	26.1567	19.3932	-42.9721	-14.3793	8.47864	0.285488			-8.49456	-20.2447	-28.7852	-16.0006	-12.2649	-6.94611	10.3787	2.46245	-23.0083	-52.4222	13.7179	-19.5039	-5.26029
3.314	60.8811	-54.6004	-24.6501	9.51062	-8.12329	-0.328944	2.60599	26.2568	19.3052	-42.8646	-14.4878	8.41067	0.472472			-8.53976	-20.6041	-28.6866	-16.0727	-12.2435	-7.00613	10.4327	2.271	-23.0509	-52.4158	13.7209	-19.6448	-5.14028
3.316	60.7065	-54.7591	-24.5332	9.49943	-8.13308	-0.27244	2.57541	26.3393	19.244	-42.7909	-14.6266	8.29886	0.6412			-8.53604	-20.7091	-28.6549	-16.2575	-12.2729	-7.0203	10.4869	2.04918	-23.1463	-52.4088	13.6992	-19.7193	-5.03336
3.318	60.5171	-54.862	-24.4555	9.51954	-8.17523	-0.216608	2.57001	26.3927	19.1517	-42.7107	-14.6935	8.15938	0.864374			-8.46223	-20.6627	-28.6356	-16.4292	-12.2941	-6.9965	10.5221	1.82662	-23.3543	-52.3457	13.6704	-19.7881	-4.92355
3.32	60.4307	-54.8257	-24.4898	9.60504	-8.21045	-0.19824	2.5684	26.388	19.1074	-42.6612	-14.7093	8.09505	1.1025			-8.384	-20.742	-28.6523	-16.616	-12.3382	-6.95118	10.5459	1.72683	-23.5106	-52.2385	13.6743	-19.696	-4.79291
3.322	60.539	-54.7736	-24.6262	9.67386	-8.28083	-0.21896	2.6087	26.3961	19.0078	-42.713	-14.6722	8.05728	1.34644			-8.34219	-20.8349	-28.8313	-16.8017	-12.4173	-6.88925	10.4828	1.77026	-23.6519	-52.1562	13.6804	-19.5968	-4.6944
3.324	60.7004	-54.706	-24.9705	9.77372	-8.34637	-0.263914	2.66053	26.3707	18.9214	-42.5719	-14.6122	8.05312	1.47365			-8.26508	-20.8216	-29.0024	-16.9522	-12.5133	-6.83474	10.3932	1.88679	-23.6569	-52.1284	13.6931	-19.5805	-4.68201
3.326	60.9159	-54.5813	-25.2469	9.84334	-8.37805	-0.29939	2.67891	26.3234	18.8734	-42.5414	-14.4924	8.07465	1.43434			-8.12847	-20.7598	-29.1448	-17.0466	-12.5836	-6.77659	10.3089	1.97028	-23.6616	-52.1653	13.7197	-19.5821	-4.75198
3.328	61.127	-54.4685	-25.382	9.91087	-8.38106	-0.37569	2.677	26.283	18.8188	-42.5939	-14.3829	8.19448	1.25073			-7.97992	-20.7672	-29.2259	-17.1596	-12.6284	-6.7446	10.248	2.0776	-23.6651	-52.1817	13.7097	-19.5664	-4.85346
3.33	61.2686	-54.4542	-25.3509	9.99135	-8.38586	-0.46263	2.66199	26.2038	18.7363	-42.6393	-14.2988	8.42029	1.09425			-7.79485	-20.9052	-29.2012	-17.2597	-12.6394	-6.73656	10.237	2.22711	-23.6779	-52.2047	13.7108	-19.5778	-4.95515
3.332	61.514	-54.4095	-25.2839	9.99036	-8.37848	-0.573104	2.63606	26.0839	18.7387	-42.6865	-14.1912	8.71021	0.87906			-7.56876	-21.0029	-29.116	-17.2679	-12.6171	-6.76046	10.2427	2.364	-23.7032	-52.2123	13.7125	-19.4998	-4.96062
3.334	61.7329	-54.3815	-25.1433	10.0058	-8.43336	-0.687428	2.61884	25.9369	18.8143	-42.7229	-14.1236	8.96561	0.702646			-7.3484	-21.1259	-29.0795	-17.272	-12.5609	-6.78412	10.2669	2.56665	-23.6819	-52.2144	13.6853	-19.407	-4.99055
3.336	61.9395	-54.3528	-24.9029	9.9958	-8.50186	-0.745906	2.57261	25.8313	18.9632	-42.7944	-14.0512	9.09873	0.570584			-7.07095	-21.1487	-29.1808	-17.2674	-12.476	-6.82485	10.3062	2.74795	-23.5893	-52.2419	13.6982	-19.2888	-5.0251
3.338	62.1996	-54.4055	-24.626	9.92705	-8.54991	-0.749868	2.52694	25.7093	19.1095	-42.8837	-13.9673	9.11466	0.534212			-6.83505	-21.0823	-29.2721	-17.1527	-12.4099	-6.81797	10.3505	2.98087	-23.5241	-52.2871	13.6954	-19.1568	-5.06485
3.34	62.3576	-54.6142	-24.3759	9.873	-8.62387	-0.634382	2.48413	25.6149	19.2218	-43.0106	-13.8695	9.02516	0.496048			-6.61998	-21.1234	-29.3998	-17.0285	-12.3315	-6.7478	10.3998	3.14815	-23.4755	-52.3225	13.6744	-19.1084	-5.14361
3.342	62.4609	-54.8736	-24.1615	9.86147	-8.70715	-0.532294	2.45732	25.5052	19.2312	-43.1597	-13.791	8.9369	0.562912			-6.51371	-21.3462	-29.3914	-16.9429	-12.2609	-6.62207	10.4349	3.31804	-23.4414	-52.3497	13.6883	-19.1428	-5.11675
3.344	62.445	-55.0345	-23.9629	9.85271	-8.7985	-0.473858	2.44335	25.5278	19.2068	-43.4021	-13.7327	8.80958	0.70021			-6.61382	-21.4928	-29.333	-16.7897	-12.2625	-6.51008	10.4798	3.42115	-23.427	-52.3837	13.677	-19.2694	-5.06176
3.346	62.3938	-55.2072	-23.8557	9.77885	-8.86957	-0.455546	2.47936	25.5654	19.176	-43.5259	-13.666	8.68906	0.814562			-6.7248	-21.5273	-29.3087	-16.651	-12.2853	-6.43574	10.4939	3.52638	-23.4332	-52.39	13.6697	-19.415	-4.97447
3.348	62.2893	-55.2946	-23.7874	9.76048	-8.86103	-0.470064	2.54045	25.6543	19.1525	-43.6994	-13.5932	8.56813	0.943516			-6.85108	-21.6147	-29.2547	-16.5819	-12.3272	-6.45016	10.4448	3.6185	-23.4629	-52.4161	13.67	-19.5791	-4.89859
3.35	62.2038	-55.2816	-23.8384	9.78113	-8.83652	-0.536802	2.59094	25.7292	19.0763	-43.9307	-13.5012	8.49141	1.08273			-6.9865	-21.9088	-29.3317	-16.6107	-12.3745	-6.53314	10.3602	3.59926	-23.5328	-52.4736	13.6645	-19.6912	-4.83302
3.352	62.0275	-55.3272	-24.0155	9.85699	-8.8437	-0.60879	2.60035	25.7081	19.0304	-44.0351	-13.4216	8.37739	1.17446			-7.0518	-22.2962	-29.5601	-16.6223	-12.4101	-6.60076	10.2826	3.51798	-23.6313	-52.5534	13.6448	-19.8783	-4.75212
3.354	61.9433	-55.3584	-24.3314	9.914	-8.83354	-0.672042	2.60578	25.6611	18.9899	-44.0623	-13.3366	8.30512	1.34406			-7.13983	-22.7108	-29.769	-16.6405	-12.3965	-6.6541	10.2095	3.311	-23.7532	-52.6269	13.6448	-19.9786	-4.65521
3.356	61.9564	-55.312	-24.5212	9.93985	-8.79362	-0.70637	2.60032	25.6411	18.9535	-44.0323	-13.2247	8.21026	1.4742			-7.14382	-22.8991	-29.9421	-16.7482	-12.3484	-6.6933	10.1939	3.02175	-23.8776	-52.6693	13.6741	-20.1316	-4.60526
3.358	62.0928	-55.2702	-24.5637	10.0146	-8.7585	-0.68719	2.59158	25.5917	18.9361	-43.9092	-13.1431	8.12542	1.63792			-7.1093	-22.9391	-30.0305	-16.9226	-12.2581	-6.6872	10.2089	2.80207	-23.9608	-52.6256	13.717	-20.2482	-4.54675
3.36	62.2146	-55.198	-24.5041	10.012	-8.73796	-0.64533	2.56977	25.5231	18.9028	-43.8562	-13.082	8.07985	1.80877			-6.96613	-22.9075	-29.9924	-17.0999	-12.164	-6.61363	10.2215	2.75594	-24.085	-52.5541	13.7736	-20.3401	-4.50729
3.362	62.4619	-55.2766	-24.3878	9.98325	-8.7584	-0.609042	2.54173	25.4262	18.8566	-43.837	-13.0496	8.01993	1.97607			-6.78922	-22.9205	-29.8852	-17.2213	-12.1258	-6.49191	10.2553	2.80294	-24.1704	-52.4282	13.816	-20.4513	-4.45714
3.364	62.6895	-55.3744	-24.1772	9.95289	-8.74768	-0.608118	2.48695	25.3663	18.8464	-43.8001	-13.0527	7.94076	2.14936			-6.57471	-22.8667	-29.898	-17.3564	-12.1233	-6.37253	10.3036	2.8798	-24.2894	-52.2952	13.8982	-20.592	-4.38291
3.366	62.8985	-55.5536	-23.8968	9.91512	-8.78671	-0.611688	2.4526	25.2864	18.7991	-43.8836	-13.0546	7.89228	2.31006			-6.34371	-22.7209	-29.978	-17.3796	-12.1599	-6.26781	10.3523	2.87456	-24.3972	-52.2475	13.9535	-20.6781	-4.33079
3.368	63.0699	-55.6708	-23.6281	9.89866	-8.82487	-0.627214	2.43153	25.2222	18.7825	-43.8285	-13.1273	7.81245	2.48543			-6.16494	-22.6166	-30.0537	-17.3258	-12.2594	-6.24632	10.3944	2.9461	-24.5012	-52.2322	13.947	-20.8323	-4.27714
3.37	63.2816	-55.6693	-23.4396	9.96951	-8.83609	-0.680176	2.44338	25.1854	18.7606	-43.8726	-13.2126	7.74985	2.67254			-5.92584	-22.7014	-30.011	-17.2248	-12.3761	-6.31042	10.404	3.01633	-24.6124	-52.289	13.8781	-20.8967	-4.19605
3.372	63.4757	-55.7115	-23.2651	10.0558	-8.86897	-0.73003	2.48577	25.1636	18.7512	-43.8677	-13.3362	7.69339	2.84602			-5.74158	-23.1529	-29.9842	-17.0542	-12.4911	-6.39869	10.3349	3.08449	-24.6991	-52.3478	13.7472	-21.0083	-4.10525
3.374	63.6692	-55.7662	-23.1746	10.1548	-8.86983	-0.786464	2.54366	25.2784	18.7328	-43.9187	-13.352	7.63409	3.0633			-5.65044	-23.7449	-29.8781	-16.8109	-12.5638	-6.47674	10.2294	3.15587	-24.7886	-52.3992	13.6206	-21.1054	-3.99169
3.376	63.8046	-55.7963	-23.1322	10.2422	-8.87656	-0.836486	2.56211	25.5306	18.7159	-44.0036	-13.335	7.52346	3.29594			-5.65894	-24.1646	-29.8426	-16.6865	-12.5492	-6.52488	10.1612	3.16287	-24.8981	-52.4184	13.5198	-21.2128	-3.89539
3.378	63.894	-55.7606	-23.0942	10.2328	-8.91733	-0.853034	2.54377	25.7325	18.706	-44.1818	-13.2868	7.41196	3.48618			-5.70993	-24.364	-29.879	-16.6571	-12.4792	-6.52625	10.0989	3.17695	-25.0228	-52.4472	13.3898	-21.3776	-3.90888
3.38	63.918	-55.6885	-23.212	10.1693	-8.93855	-0.797412	2.52647	25.8544	18.7234	-44.3073	-13.2864	7.31811	3.60734			-5.79957	-24.4281	-30.0542	-16.6842	-12.4232	-6.44991	10.0896	3.27972	-25.0709	-52.4745	13.3193	-21.4644	-3.98492
3.382	63.9421	-55.6452	-23.4153	10.1041	-9.00052	-0.726166	2.49845	25.9138	18.8004	-44.4015	-13.343	7.21762	3.60429			-5.92334	-24.4163	-30.324	-16.7974	-12.373	-6.32121	10.1168	3.3042	-25.086	-52.5086	13.2351	-21.505	-4.12457
3.384	63.9009	-55.6766	-23.5089	10.131	-9.06643	-0.687988	2.47852	25.9641	18.8869	-44.5011	-13.4072	7.18773	3.63201			-5.98737	-24.366	-30.5827	-16.9951	-12.2884	-6.18989	10.1389	3.27503	-25.0298	-52.5562	13.1798	-21.4867	-4.23261
3.386	63.756	-55.8708	-23.4545	10.1437	-9.09056	-0.658294	2.43139	25.9388	18.9773	-44.6026	-13.408	7.23951	3.54519			-5.93254	-24.2422	-30.7059	-17.0794	-12.1987	-6.08552	10.1846	3.27963	-25.0202	-52.6301	13.1681	-21.4348	-4.2175
3.388	63.5762	-56.1053	-23.2199	10.1644	-9.11905	-0.682346	2.38186	25.8344	18.9646	-44.6848	-13.3806	7.32894	3.38724			-5.83435	-24.0931	-30.6838	-17.1732	-12.1381	-6.05465	10.2187	3.24016	-24.9445	-52.7246	13.2029	-21.344	-4.08563
3.39	63.4939	-56.1472	-22.8896	10.2508	-9.13125	-0.760284	2.34073	25.7107	18.9169	-44.7113	-13.2953	7.5117	3.23883			-5.69295	-24.1449	-30.6503	-17.2923	-12.1266	-6.12192	10.2615	3.2866	-24.8981	-52.8432	13.2678	-21.1973	-3.96375
3.392	63.4705	-56.0591	-22.4972	10.3758	-9.15177	-0.822402	2.31932	25.5566	18.8319	-44.6064	-13.1699	7.65597	3.1353			-5.54207	-24.459	-30.6366	-17.4658	-12.1478	-6.21029	10.3019	3.38171	-24.9012	-52.8539	13.3893	-21.0319	-3.82064
3.394	63.555	-56.0421	-22.0732	10.5204	-9.12927	-0.876274	2.31519	25.3751	18.7426	-44.5578	-13.0737	7.79099	3.12935			-5.4644	-25.081	-30.7435	-17.5584	-12.2061	-6.27796	10.3226	3.46298	-24.9222	-52.8397	13.5514	-20.8954	-3.69363
3.396	63.7579	-56.0349	-21.8287	10.5778	-9.14915	-0.887516	2.32007	25.2166	18.6704	-44.4742	-13.0361	7.86944	3.14068			-5.41121	-25.7357	-30.8305	-17.4438	-12.2808	-6.32162	10.2851	3.49951	-25.0412	-52.7474	13.6667	-20.6366	-3.66106
3.398	64.0268	-55.957	-21.6707	10.7834	-9.15866	-0.856842	2.36858	25.0379	18.6215	-44.45	-12.9757	7.88511	3.20083			-5.36236	-26.0924	-30.7856	-17.6063	-12.3268	-6.30375	10.2099	3.56639	-25.1401	-52.6098	13.7543	-20.4784	-3.74906
3.4	64.2347	-55.8907	-21.743	10.8882	-9.16829	-0.847784	2.39501	24.8815	18.5822	-44.4353	-13.0157	7.87815	3.25828			-5.18714	-26.2245	-30.7479	-17.619	-12.2953	-6.21424	10.123	3.69205	-25.2379	-52.5019	13.7982	-20.4339	-3.86238
3.402	64.4057	-55.7968	-21.8382	10.9138	-9.21455	-0.825034	2.41207	24.7211	18.5179	-44.4583	-13.0701	7.89772	3.33635			-5.06374	-26.1893	-30.8168	-17.5746	-12.248	-6.11635	10.0637	3.77136	-25.3402	-52.5415	13.8083	-20.374	-3.97852
3.404	64.5956	-55.8325	-22.0456	10.9485	-9.29573	-0.828646	2.42396	24.6107	18.5128	-44.3281	-13.0976	7.91315	3.46609			-4.95509	-26.1917	-30.9673	-17.6457	-12.2114	-5.97799	10.0214	3.82169	-25.4149	-52.5465	13.7251	-20.3749	-3.99724
3.406	64.7278	-56.0166	-22.1985	10.9	-9.35606	-0.816634	2.40335	24.5397	18.458	-44.3613	-13.0696	7.92648	3.71027			-4.95036	-26.1468	-31.1565	-17.6579	-12.1601	-5.86727	10.0478	3.87317	-25.4798	-52.5667	13.6548	-20.4442	-3.95921
3.408	64.7725	-56.2139	-22.2341	10.8849	-9.40436	-0.826182	2.35703	24.4573	18.4337	-44.4235	-12.997	7.92243	3.95822			-4.96584	-26.0545	-31.218	-17.8259	-12.0618	-5.78145	10.0815	3.94493	-25.565	-52.5973	13.6334	-20.487	-3.88111
3.41	64.7571	-56.3163	-22.0629	10.8788	-9.43481	-0.874132	2.31511	24.355	18.3796	-44.4766	-12.9127	7.87093	4.13729			-5.01308	-25.9678	-31.208	-18.0422	-11.9813	-5.76726	10.1379	3.99987	-25.6385	-52.6273	13.5702	-20.5793	-3.81338
3.412	64.7122	-56.2745	-21.6966	10.8701	-9.43901	-0.901544	2.27049	24.3175	18.3618	-44.5266	-12.8485	7.83356	4.3223			-5.03642	-26.0838	-31.2142	-18.2428	-11.9336	-5.81027	10.1851	4.10602	-25.7232	-52.6742	13.5152	-20.6543	-3.73037
3.414	64.5488	-56.1206	-21.2048	10.81	-9.43705	-0.938084	2.25789	24.3129	18.3021	-44.6127	-12.7757	7.78186	4.58774			-5.0657	-26.5234	-31.3238	-18.4527	-11.931	-5.89618	10.2175	4.17367	-25.8221	-52.7232	13.4632	-20.7679	-3.65897
3.416	64.3044	-56.0102	-20.8211	10.7235	-9.42668	-0.955318	2.24266	24.3632	18.2624	-44.7252	-12.6858	7.71478	4.80837			-5.02481	-27.1131	-31.4613	-18.6387	-11.9625	-5.97834	10.2386	4.20371	-25.9041	-52.7555	13.4351	-20.8978	-3.62652
3.418	64.0926	-55.9486	-20.5308	10.7307	-9.38409	-0.963424	2.23905	24.4554	18.2036	-44.8877	-12.6199	7.67098	4.94838			-5.0241	-27.5276	-31.5005	-18.8598	-12.0287	-6.02001	10.2271	4.20906	-25.9807	-52.8078	13.4094	-20.949	-3.69351
3.42	64.0763	-55.8811	-20.3561	10.6527	-9.42521	-0.955416	2.22295	24.5001	18.1037	-45.0576	-12.537	7.60453	4.97125			-5.01264	-27.7083	-31.4586	-18.8867	-12.0918	-6.0101	10.1689	4.20371	-26.1042	-52.8595	13.387	-21.0818	-3.81798
3.422	64.167	-55.8273	-20.4277	10.5669	-9.4129	-0.963354	2.20725	24.5876	18.0193	-45.252	-12.5007	7.56253	4.96772			-4.96997	-27.7444	-31.4473	-18.9012	-12.1567	-5.96523	10.1039	4.1117	-26.1662	-52.9117	13.3716	-21.1839	-3.92966
3.424	64.2837	-55.8721	-20.5293	10.4078	-9.42645	-0.979706	2.17181	24.7196	17.9237	-45.4378	-12.4349	7.51915	4.98093			-4.90504	-27.7549	-31.5067	-18.8615	-12.1799	-5.90198	10.0728	3.90914	-26.164	-52.9784	13.359	-21.2897	-3.98555
3.426	64.4659	-55.9546	-20.7197	10.4216	-9.45476	-1.00685	2.15356	24.7411	17.9079	-45.716	-12.3743	7.45394	4.88779			-4.76549	-27.6871	-31.6827	-18.8308	-12.1568	-5.82961	10.0262	3.72355	-26.1152	-53.0592	13.3133	-21.4071	-3.87715
3.428	64.6622	-56.1132	-20.8715	10.4739	-9.51794	-1.06352	2.14994	24.6837	17.9035	-45.8118	-12.2944	7.38849	4.76934			-4.64745	-27.5572	-31.804	-18.7461	-12.119	-5.75103	10.0152	3.6751	-26.0403	-53.0966	13.2694	-21.5223	-3.69397
3.43	64.8409	-56.2405	-20.8201	10.601	-9.55982	-1.08993	2.16003	24.637	17.8944	-46.0262	-12.2289	7.31863	4.64808			-4.63103	-27.3967	-31.8757	-18.3367	-12.0084	-5.65793	10.0541	3.6764	-25.9996	-53.1779	13.2421	-21.6197	-3.5316
3.432	65.0147	-56.382	-20.6042	10.7932	-9.55846	-1.10446	2.13732	24.625	17.9229	-46.0903	-12.1727	7.2459	4.57657			-4.63995	-27.2597	-31.8631	-18.2972	-11.935	-5.57057	10.103	3.65271	-25.9237	-53.253	13.2331	-21.7354	-3.41302
3.434	65.1217	-56.4221	-20.1673	10.9408	-9.5969	-1.12787	2.10739	24.6288	18.0567	-46.0116	-12.0984	7.18578	4.59397			-4.67293	-27.3054	-31.8286	-18.0849	-11.8658	-5.47033	10.1846	3.64755	-25.8448	-53.2493	13.217	-21.8179	-3.41342
3.436	65.1886	-56.3263	-19.712	10.9829	-9.59364	-1.1361	2.11231	24.5953	18.1777	-45.9886	-12.0467	7.14686	4.61656			-4.72437	-27.5463	-31.9118	-17.8506	-11.837	-5.38993	10.2523	3.66764	-25.795	-53.2679	13.2568	-21.9018	-3.47463
[truncated: 2,386 more rows]
