# Supplementary material for: Strong confinement of active microalgae leads to inversion of vortex flow and enhanced mixing
Source: eLife. 2021 Nov 22;10:e67663. doi: 10.7554/eLife.67663 (PMC8758135; doi:10.7554/eLife.67663)
Supplement: Figure 2—source data 3. [file elife-67663-fig2-data3.xlsx]

## Sheet: Sheet1
Figure 2C: Trajectories of representative 17 SYNCHRONOUS cells in H = 10 micron
	X-coordinates of the H10 Synchronous trajectories (micron)																			Y-coordinates of the H10 Synchronous trajectories (micron)
Cell index →	1	2	3	4	5	6	7	8	9	10	11	12	13	14	15	16	17			1	2	3	4	5	6	7	8	9	10	11	12	13	14	15	16	17
Time (s) ↓
0	0	0	0	0	0	0	0	0	0	0	0	0	0	0	0	0	0			0	0	0	0	0	0	0	0	0	0	0	0	0	0	0	0	0
0.002	-0.016632	-0.00126	0.024766	0.00875	-0.005656	-0.006692	0.001092	0.024262	-0.02436	-0.007938	0.007518	-0.008834	0.036358	0.011452	0.001806	0.06251	0.015554			-0.035476	0.018466	-0.00945	0.011102	0.003892	-0.031416	0.023184	-0.013944	-0.00175	-0.005208	0.008456	0.003626	0.049994	0.004382	-0.001022	0.037996	0.017066
0.004	-0.006608	0.008778	0.030828	0.011634	-0.008652	0.025592	0.009954	0.014658	-0.02156	-0.040026	0.004326	0.0028	0.069048	0.034482	-0.014896	0.110236	0.04158			-0.083622	-0.006916	0.011312	0.028686	-0.007588	0.00749	0.008204	0.011256	0.014098	-0.015638	0.001302	-0.000826	0.048958	0.004298	0.007196	0.132356	-0.057638
0.006	0.007252	-0.012474	0.027426	0.010836	0.01001	-0.018018	0.030142	0.024192	-0.005922	-0.010976	-0.004452	-0.024332	0.085834	0.041398	0.001946	0.174258	0.06216			-0.093716	-0.014448	0.018564	0.02618	-0.03094	0.058436	-0.019418	0.02282	0.049364	-0.02086	-0.001526	-0.023856	0.074872	-0.00651	0.001638	0.167748	-0.14042
0.008	0.02485	-0.012936	-0.021728	0.008806	-0.008666	-0.007252	0.050778	0.01519	-0.009534	-0.022568	-0.010332	-0.010066	0.062594	0.0504	0.0007	0.200634	0.064442			-0.117194	0.0035	-0.007028	0.004704	-0.035308	0.07091	-0.047558	0.0294	0.05376	-0.0147	-0.000616	-0.045346	0.056392	-0.008344	0.015988	0.216216	-0.192724
0.01	0.037478	-0.03003	-0.031108	-9.8e-05	0.011116	-0.006706	0.061334	-0.004732	-0.019656	-0.020146	-0.004914	0.001176	0.047152	0.017948	0.017696	0.137844	0.062104			-0.163604	-0.005306	0.018088	-0.01288	-0.039424	0.028518	-0.028462	0.015176	0.037716	-0.015414	0.00091	-0.040698	0.059976	-0.000658	0.014266	0.221046	-0.20566
0.012	0.00952	-0.02996	-0.025438	-0.001456	0.013706	0.006244	0.051814	0.01939	0.006202	-0.028224	-0.003192	0.007028	0.046522	-0.010906	0.02086	0.153566	0.12131			-0.139846	-0.0357	-0.010444	-0.011284	-0.037198	0.000224	-0.005922	-0.005278	0.051772	-0.032592	0.022176	-0.00469	0.064036	0.001218	-0.0252	0.214704	-0.178738
0.014	0.03339	-0.0112	-0.006286	-0.011844	0.00357	0.01918	0.046606	0.014392	0.00742	-0.029316	0.005642	0.023436	0.0427	-0.025634	0.01582	0.125328	0.155344			-0.109704	-0.026838	-0.045206	-0.005852	-0.056084	-0.018648	0.008498	0.003794	0.018592	-0.03017	0.044044	0.03857	0.033642	-0.00322	-0.031486	0.205408	-0.125748
0.016	0.027594	-0.018214	-0.014938	-0.015932	0.028644	0.01932	0.027244	0.03185	-0.015036	-0.039956	-0.002226	0.007448	0.052948	-0.03521	0.003346	0.141022	0.149268			-0.060368	-0.021	-0.060634	-0.002254	-0.051492	0.009716	0.022904	0.020622	0.009282	-0.011424	0.040474	0.092596	0.038752	0.002366	-0.019712	0.181622	-0.113988
0.018	0.02492	0.013006	-0.02345	-0.015974	0.026684	0.024836	-0.012824	0.000966	-0.036512	-0.016436	0.007308	-0.011102	0.083146	-0.033908	0.001092	0.14133	0.106484			-0.073416	-0.00091	-0.075348	-0.008918	-0.019278	0.028994	0.064246	0.013734	0.036946	-0.01554	0.042336	0.0504	0.044128	0.002184	-0.021126	0.207718	-0.141498
0.02	0.049448	-0.012838	0.014882	-0.016506	0.019166	0.021154	0.001022	-0.008204	-0.030786	-0.034734	0.00693	0.009114	0.11235	-0.01883	0.001008	0.213136	0.066528			-0.072912	0.008624	-0.068894	0.000532	-0.004942	0.053956	0.074774	0.01288	0.035728	-0.026544	0.042784	0.059724	0.092008	0.006804	-0.027328	0.288456	-0.17374
0.022	0.031206	-0.033866	-0.003346	-0.015624	0.009142	0.036064	-0.018018	-0.017052	-0.029414	-0.076034	0.00315	-0.002814	0.146874	0.001428	0.014616	0.264236	0.097398			-0.121926	-0.00875	-0.072548	0.00854	-0.006706	0.021938	0.086464	0.010108	0.04263	-0.025494	0.041888	0.018116	0.103852	0.009044	-0.013384	0.342454	-0.201614
0.024	0.008862	-0.007042	0.01743	-0.022302	0.021056	0.07602	0.010584	0.002058	-0.019796	-0.053242	0.006104	0.011704	0.146216	0.009926	0.02828	0.299236	0.15239			-0.11361	-0.036848	-0.055328	0.003612	-0.033614	0.019124	0.063784	0.023128	0.05516	-0.049084	0.039326	0.014098	0.134512	0.006398	-0.046578	0.423934	-0.245994
0.026	0.05558	-0.017234	0.022442	-0.016282	0.017752	0.040992	0.027916	0.00434	-0.022708	-0.060886	0.003108	0.002128	0.129668	-0.006832	0.022596	0.334796	0.185766			-0.129738	-0.046186	-0.040922	0.00028	-0.02296	-0.004172	0.04613	0.013426	0.064988	-0.001526	0.028378	0.025886	0.09716	0.01526	-0.022904	0.457394	-0.293006
0.028	0.064568	-0.016016	-0.021336	-0.028406	0.013762	0.018774	0.037702	-0.024584	-0.024276	-0.046858	0.001652	0.011032	0.113848	-0.0329	0.038248	0.315532	0.236096			-0.149996	-0.052318	-0.076776	-0.007938	-0.037772	-0.010332	0.054082	-0.00336	0.06034	-0.001036	0.015918	0.063294	0.11452	0.011592	-0.063616	0.458206	-0.344974
0.03	0.070308	-0.024836	-0.019124	-0.035952	0.010094	0.052458	0.016562	-0.025788	-0.00637	-0.05411	-0.007742	0.027734	0.121394	-0.055132	-0.002226	0.304458	0.174818			-0.153846	-0.050358	-0.077728	-0.01239	-0.034846	0.01638	0.07651	0.012656	0.039424	-0.002982	0.01827	0.110166	0.096096	0.005474	-0.061334	0.438718	-0.278964
0.032	0.080136	-0.028196	-0.028924	-0.05054	0.012656	0.035672	0.000266	-0.038486	-0.023842	-0.080444	-0.004872	0.024472	0.116536	-0.068614	0.046592	0.310086	0.198282			-0.166012	-0.067354	-0.104804	-0.000546	-0.025984	0.034552	0.088886	0.005894	0.021182	-0.027286	0.031164	0.116606	0.091126	0.012264	-0.092428	0.424788	-0.216188
0.034	0.075558	-0.036288	-0.03388	-0.040278	0.029204	0.032746	0.008302	-0.01141	-0.04613	-0.079646	0.004648	0.00854	0.136948	-0.081102	0.010388	0.282534	0.209846			-0.11319	-0.079968	-0.118818	0.00945	-0.04725	0.026026	0.112112	0.015876	0.02261	-0.02156	0.0336	0.11298	0.118608	0.016562	-0.053872	0.417634	-0.24024
0.036	0.085722	-0.018256	-0.034454	-0.041804	0.02485	0.037086	0.01148	-0.016856	-0.043414	-0.072814	0.009814	0.017766	0.18928	-0.079912	0.024332	0.308742	0.130704			-0.088508	-0.046676	-0.153874	0.004186	-0.023702	0.017416	0.11116	0.015582	0.01295	-0.02989	0.052304	0.118846	0.147588	0.01288	-0.048678	0.415156	-0.23975
0.038	0.07154	-0.023184	-0.043442	-0.03283	-0.010696	0.044604	-0.018578	-0.004214	-0.05425	-0.071302	0.017556	0.001512	0.179564	-0.04907	0.027174	0.32403	0.149758			-0.104622	-0.04711	-0.149758	0.004354	-0.007378	-0.01533	0.131614	0.00952	0.039634	-0.01722	0.058926	0.112406	0.162792	0.017458	-0.062174	0.45906	-0.239092
0.04	0.065856	-0.044324	-0.025018	-0.040488	0.018158	0.061446	-0.04228	-0.01281	-0.059794	-0.081102	0.012852	-0.005684	0.186228	-0.038808	0.043022	0.374276	0.169512			-0.131782	-0.043162	-0.153286	0.003038	-0.02527	-0.01869	0.157388	0.01274	0.043106	-0.035448	0.072422	0.083272	0.18641	0.012222	-0.076748	0.529508	-0.28882
0.042	0.08225	-0.023968	-0.009338	-0.049518	-0.006748	0.077504	-0.045262	-0.032774	-0.061796	-0.088648	0.016016	0.01687	0.17171	-0.041944	0.071036	0.43652	0.215572			-0.186494	-0.056602	-0.181454	0.001862	-0.035252	-0.032214	0.185598	-0.008848	0.047628	-0.042112	0.072772	0.072352	0.155386	0.00133	-0.123116	0.634942	-0.351876
0.044	0.0707	-0.008526	-0.0007	-0.05656	0.012614	0.094696	-0.034678	-0.022008	-0.063448	-0.098644	0.01099	0.006678	0.178472	-0.045514	0.04284	0.468062	0.25375			-0.18158	-0.072758	-0.161098	-0.002254	-0.03934	-0.042686	0.156702	0.015232	0.040236	-0.026908	0.079464	0.113666	0.167678	0.003024	-0.088102	0.683004	-0.433076
0.046	0.116746	-0.022876	0.008022	-0.056546	0.014504	0.08435	-0.006496	-0.011424	-0.042168	-0.08316	0.021938	0.034244	0.1757	-0.068614	0.015162	0.489832	0.28588			-0.186046	-0.063854	-0.143164	0.000364	-0.052136	-0.042434	0.16632	0.018452	0.04214	-0.01981	0.074956	0.16716	0.154756	0.00854	-0.09289	0.689794	-0.486486
0.048	0.125272	-0.030912	-0.035196	-0.06384	0.018438	0.081312	0.02268	-0.031024	-0.031374	-0.084574	0.017066	0.025578	0.172018	-0.09576	-0.003472	0.428792	0.239904			-0.195846	-0.07056	-0.141722	-0.009926	-0.054614	-0.0336	0.141148	-0.001316	0.05166	0.000854	0.056798	0.192206	0.16114	0.016604	-0.089194	0.659694	-0.455112
0.05	0.12271	-0.034272	-0.064974	-0.05915	0.011368	0.050274	0.010738	-0.04123	-0.04151	-0.103418	0.012222	0.002506	0.187376	-0.112952	0.024164	0.424718	0.24647			-0.170044	-0.067018	-0.148946	-0.015162	-0.053704	-0.00119	0.135758	0.01316	0.015946	-0.01981	0.04571	0.219086	0.172256	0.020902	-0.069034	0.67305	-0.39669
0.052	0.125384	-0.0273	-0.071358	-0.066332	0.015288	0.068866	0.010864	-0.019418	-0.054236	-0.121772	0.016002	-0.003122	0.203042	-0.127666	0.028364	0.441126	0.244524			-0.121198	-0.056546	-0.1666	-0.019978	-0.039956	0.010906	0.130354	0.007224	0.005642	-0.029358	0.040796	0.180754	0.187138	0.013272	-0.08932	0.657608	-0.376558
0.054	0.139384	-0.005012	-0.067494	-0.062496	0.003528	0.058142	-0.00539	-0.02366	-0.093814	-0.100338	0.004214	-0.016212	0.240212	-0.11928	0.029876	0.438368	0.247296			-0.113148	-0.026614	-0.162092	-0.013552	-0.045402	-0.023758	0.174958	0.024556	0.003416	-0.040054	0.043106	0.177338	0.240534	0.010794	-0.07217	0.642026	-0.38157
0.056	0.134092	0.002954	-0.066304	-0.057582	0.00539	0.070826	-0.008442	-0.016394	-0.087654	-0.103572	0.011018	-0.005894	0.241724	-0.094416	0.035546	0.430094	0.25802			-0.091826	-0.00098	-0.186382	-0.001694	-0.011116	-0.058604	0.197736	0.008988	0.009282	-0.02345	0.0427	0.16464	0.28224	0.019852	-0.094164	0.675514	-0.371378
0.058	0.148064	0.004004	-0.052402	-0.057974	0.00497	0.092736	-0.022806	-0.011718	-0.08372	-0.095452	0.014224	0.011802	0.211526	-0.086226	0.035182	0.476084	0.303814			-0.134862	-0.013048	-0.219772	0.001946	-0.044254	-0.081424	0.208936	0.031192	0.03962	-0.043274	0.05558	0.143948	0.25354	0.02555	-0.063322	0.739424	-0.430682
0.06	0.149856	-0.028476	-0.01442	-0.06769	0.004872	0.099218	-0.047684	-0.037674	-0.077532	-0.120134	0.018858	0.013706	0.188608	-0.073794	0.01743	0.542528	0.325402			-0.1701	-0.060424	-0.213808	0.013832	-0.042084	-0.066612	0.223818	0.018676	0.076566	-0.05334	0.06356	0.16646	0.26117	0.023618	-0.089712	0.832958	-0.487424
0.062	0.158998	-0.013972	-0.035238	-0.062216	0.02674	0.111104	-0.045906	-0.048104	-0.087276	-0.112588	0.016674	0.008764	0.17913	-0.095704	0.013174	0.542906	0.357238			-0.19845	-0.046746	-0.226674	0.017892	-0.052486	-0.023324	0.231854	0.016576	0.050218	-0.056616	0.076216	0.217364	0.256536	0.032984	-0.098014	0.877044	-0.566846
0.064	0.157122	-0.025396	-0.023506	-0.061614	0.011074	0.099862	-0.03997	-0.047586	-0.07175	-0.127386	0.01323	-0.006706	0.164052	-0.131894	0.017738	0.551936	0.400274			-0.196952	-0.05096	-0.212716	0.002408	-0.053172	-0.01092	0.218148	0.01526	0.062902	-0.04312	0.08743	0.261352	0.235942	0.024234	-0.089026	0.917098	-0.653702
0.066	0.165382	-0.022386	-0.019558	-0.061726	-0.00168	0.135324	-0.0028	-0.033866	-0.05432	-0.127638	0.026236	0.001358	0.192374	-0.153538	0.028364	0.511518	0.414232			-0.184604	-0.043148	-0.21455	-0.00854	-0.063896	-0.028714	0.252826	0.016156	0.033824	-0.022456	0.093884	0.269696	0.242914	0.02121	-0.11585	0.894992	-0.691026
0.068	0.190512	-0.034258	-0.05152	-0.074984	-0.011942	0.150696	0.013958	-0.046886	-0.080598	-0.136262	0.028224	0.022708	0.252574	-0.158326	0.063112	0.490448	0.36057			-0.16471	-0.044674	-0.221214	-0.028042	-0.058968	-0.044646	0.24801	0.003094	0.034748	-0.035028	0.096586	0.245518	0.308812	0.024948	-0.137942	0.89852	-0.600768
0.07	0.161546	-0.050988	-0.07357	-0.074074	0.013496	0.101584	0.011242	-0.068082	-0.082866	-0.157486	0.026404	-0.018228	0.242004	-0.153202	0.033726	0.521542	0.33992			-0.145152	-0.07861	-0.227388	-0.033054	-0.071428	-0.044478	0.216398	0.011312	0.001694	-0.0476	0.082824	0.233786	0.327194	0.039032	-0.100114	0.887964	-0.532882
0.072	0.16975	-0.03577	-0.056938	-0.099078	0.014098	0.1218	-0.003822	-0.062062	-0.10696	-0.166754	0.014014	0.020692	0.262962	-0.125174	0.0469	0.519834	0.328636			-0.12621	-0.03318	-0.254016	-0.027832	-0.023758	-0.076958	0.234346	0.000756	-0.00658	-0.03451	0.070294	0.199276	0.344134	0.039466	-0.11872	0.85841	-0.540484
0.074	0.166852	-0.008582	-0.07091	-0.094654	0.00987	0.119546	-0.023422	-0.04543	-0.112126	-0.151718	0.015694	0.029484	0.26908	-0.126518	0.067298	0.534954	0.302022			-0.124124	-0.008414	-0.251958	-0.012264	-0.031514	-0.074074	0.26075	0.010094	-0.00889	-0.055846	0.062958	0.22008	0.3598	0.03479	-0.16184	0.89334	-0.562856
0.076	0.178052	-0.033236	-0.060816	-0.082964	0.004396	0.125608	-0.028574	-0.043582	-0.10941	-0.137704	0.011438	0.046704	0.240268	-0.117054	0.059094	0.546854	0.295414			-0.152124	0.01183	-0.268268	-0.000308	-0.053662	-0.058408	0.264306	0.036624	-0.000574	-0.06832	0.066878	0.230818	0.325528	0.032578	-0.173838	0.983332	-0.59773
0.078	0.186942	-0.0441	-0.028644	-0.0791	0.006286	0.115332	-0.018662	-0.033152	-0.099624	-0.159922	0.00931	0.024612	0.198072	-0.137186	0.055342	0.60242	0.343042			-0.158172	-0.019796	-0.291844	-0.004508	-0.074256	-0.027944	0.245154	0.021826	0.034272	-0.049784	0.075782	0.286384	0.322952	0.030184	-0.183876	1.0529	-0.625646
0.08	0.186144	-0.063434	-0.010262	-0.086534	0.012712	0.109438	-0.023198	-0.051058	-0.118342	-0.152096	0.012558	0.021938	0.225204	-0.171136	0.015204	0.612024	0.371616			-0.173054	-0.034244	-0.276206	-0.017948	-0.070518	-0.02219	0.275814	0.019054	0.026474	-0.057974	0.08127	0.295428	0.304416	0.035686	-0.148204	1.10592	-0.703612
0.082	0.207186	-0.038542	-0.021756	-0.086268	0.010836	0.120582	-0.035056	-0.060942	-0.10402	-0.139636	0.017906	0.004424	0.234206	-0.188412	0.037576	0.608916	0.391692			-0.176022	-0.057876	-0.28301	-0.019922	-0.06685	-0.056434	0.271236	0.022204	0.01911	-0.057498	0.079156	0.31157	0.298172	0.033236	-0.121828	1.15507	-0.77434
0.084	0.213962	-0.025018	-0.028574	-0.095046	0.013426	0.15113	-0.039382	-0.051576	-0.101794	-0.153258	0.031276	0.003122	0.27377	-0.20552	0.055706	0.535738	0.401716			-0.184086	-0.037884	-0.260568	-0.013188	-0.065954	-0.069944	0.286356	0.006188	0.037254	-0.03325	0.095522	0.291382	0.327642	0.023814	-0.157584	1.1283	-0.836444
0.086	0.195972	-0.012558	-0.029834	-0.095438	-0.014728	0.158144	-0.013118	-0.039018	-0.11585	-0.161098	0.032648	0.005012	0.324058	-0.199262	0.033544	0.558306	0.415576			-0.21917	-0.054894	-0.274554	-0.002492	-0.064204	-0.083538	0.297318	0.024976	-0.004718	-0.0336	0.111272	0.279468	0.367836	0.03283	-0.143248	1.1195	-0.82222
0.088	0.26208	-0.016968	-0.044086	-0.11333	0.000994	0.12726	0.057694	-0.053592	-0.13062	-0.203966	0.033166	0.01442	0.333214	-0.182448	0.028476	0.571284	0.42651			-0.173768	-0.043638	-0.277312	-0.009422	-0.055286	-0.093562	0.2793	0.008988	-0.022554	-0.071218	0.11907	0.265258	0.38815	0.03801	-0.14497	1.1114	-0.725592
0.09	0.199318	-0.046774	-0.031066	-0.109844	0.003934	0.119728	0.102928	-0.065786	-0.13643	-0.20314	0.032298	0.030716	0.314762	-0.16625	0.055342	0.575302	0.423766			-0.169596	-0.081354	-0.29463	-0.024626	-0.071274	-0.103726	0.245182	0.011144	-0.001568	-0.072254	0.11144	0.278628	0.384006	0.042224	-0.15183	1.0893	-0.712712
0.092	0.208432	-0.037002	-0.026586	-0.11648	-0.00959	0.114786	0.114884	-0.08127	-0.150794	-0.21203	0.022344	0.014238	0.265594	-0.147952	0.028616	0.591388	0.402584			-0.163912	-0.052696	-0.323008	-0.028	-0.03969	-0.067494	0.23331	0.008246	-0.009128	-0.054824	0.10409	0.322672	0.378084	0.035126	-0.129318	1.17058	-0.696654
0.094	0.207494	-0.029148	-0.002954	-0.116844	-0.010304	0.133042	0.063924	-0.07231	-0.140952	-0.193074	0.023282	0.05152	0.26341	-0.156422	0.041888	0.60676	0.37772			-0.169302	-0.018942	-0.328986	-0.029526	-0.038752	-0.075922	0.27279	-0.005796	0.031346	-0.067858	0.100548	0.368494	0.376348	0.035896	-0.195188	1.25541	-0.723534
0.096	0.212842	-0.013846	-0.00203	-0.112392	-0.001372	0.158186	0.020692	-0.053928	-0.132314	-0.194698	0.024626	0.043512	0.280168	-0.19936	0.026964	0.61705	0.408478			-0.19096	0.009142	-0.346178	-0.01218	-0.075978	-0.054586	0.309498	0.01659	0.045444	-0.094458	0.09443	0.363426	0.354326	0.03864	-0.157724	1.34743	-0.79702
0.098	0.205898	-0.029988	0.016114	-0.110502	0.000238	0.135324	-0.040278	-0.06398	-0.151816	-0.178738	0.028672	0.007924	0.323106	-0.210658	0.023912	0.62594	0.410004			-0.182028	-0.037842	-0.347788	-0.007742	-0.074886	-0.073906	0.329994	0.039298	0.022862	-0.089642	0.093912	0.344694	0.358554	0.035476	-0.153454	1.38867	-0.833784
0.1	0.227654	-0.042784	-0.01162	-0.117712	0.016114	0.137088	-0.084378	-0.078176	-0.135338	-0.167762	0.031206	-0.005992	0.33292	-0.224994	0.051366	0.610162	0.491344			-0.178654	-0.07847	-0.351134	-0.00427	-0.082418	-0.114772	0.338086	0.017822	0.027776	-0.064218	0.08862	0.357616	0.370608	0.04438	-0.14889	1.40959	-0.868924
0.102	0.269444	-0.036862	0.0049	-0.12726	0.016492	0.142128	-0.058982	-0.067382	-0.10598	-0.176848	0.015778	-0.01582	0.367542	-0.236642	0.04151	0.579796	0.504182			-0.174762	-0.07147	-0.35161	-0.007294	-0.079436	-0.102886	0.337386	0.008638	0.010136	-0.045136	0.084028	0.333186	0.405776	0.035462	-0.125244	1.4078	-0.941332
0.104	0.252616	-0.047978	0.006678	-0.116312	-0.003374	0.160062	0.010878	-0.079548	-0.142366	-0.194334	0.013104	0.013468	0.379414	-0.22904	0.098112	0.60452	0.486388			-0.200536	-0.079268	-0.343406	-0.006916	-0.060858	-0.134652	0.341586	0.008792	0.013384	-0.05355	0.090692	0.331268	0.444682	0.031332	-0.176694	1.37428	-0.952574
0.106	0.287	-0.046872	-0.00588	-0.115654	-0.003584	0.163044	0.090272	-0.072184	-0.130718	-0.20909	0.027272	0.02835	0.362222	-0.211904	0.04669	0.597072	0.446418			-0.197764	-0.05138	-0.334096	-0.019642	-0.060242	-0.107282	0.307678	0.019208	-0.000714	-0.05782	0.105392	0.351106	0.458136	0.035826	-0.142842	1.35589	-0.860118
0.108	0.27321	-0.04249	0.000224	-0.110404	0.002296	0.167748	0.117166	-0.04557	-0.18242	-0.249312	0.041132	0.021168	0.34825	-0.189504	0.04571	0.6055	0.451052			-0.200886	-0.059206	-0.335342	-0.029274	-0.07721	-0.139636	0.308042	0.02828	0.012628	-0.08568	0.121464	0.389914	0.430906	0.046424	-0.15106	1.3719	-0.846902
0.11	0.277452	-0.052948	0.005068	-0.132552	-0.014728	0.174384	0.122864	-0.094836	-0.15694	-0.248528	0.039172	0.017234	0.344568	-0.197834	0.053004	0.590912	0.427644			-0.118062	-0.065772	-0.380422	-0.02674	-0.058296	-0.13594	0.293762	0.022078	0.006328	-0.088578	0.120722	0.417396	0.426944	0.048874	-0.166922	1.45604	-0.840854
0.112	0.277326	-0.048972	-0.001484	-0.139678	-0.013678	0.192318	0.092456	-0.082054	-0.186312	-0.224056	0.028896	0.017738	0.352702	-0.216566	0.039928	0.592312	0.43911			-0.123928	-0.05852	-0.400932	-0.030604	-0.072632	-0.099582	0.327152	-0.000378	0.004522	-0.064344	0.1225	0.458766	0.419104	0.049784	-0.17584	1.5253	-0.84448
0.114	0.27776	-0.05775	-0.002114	-0.154448	-0.013552	0.184674	0.097524	-0.082418	-0.154182	-0.222992	0.034328	-0.010906	0.337204	-0.243866	0.058128	0.603344	0.465948			-0.122948	-0.02247	-0.40999	-0.026404	-0.065856	-0.073472	0.338534	-0.001484	0.039872	-0.082026	0.125944	0.438564	0.377356	0.040376	-0.163744	1.63338	-0.868028
0.116	0.28868	-0.069762	-0.004564	-0.141974	0.01687	0.191408	0.074368	-0.073262	-0.14868	-0.220724	0.036764	-0.00861	0.38962	-0.280924	0.055104	0.603022	0.524552			-0.187824	-0.018564	-0.441602	-0.01862	-0.070714	-0.08001	0.353304	0.009548	0.030954	-0.086674	0.123214	0.438648	0.414792	0.036624	-0.198534	1.6723	-0.950292
0.118	0.277802	-0.052052	0.029302	-0.148288	0.018606	0.16954	0.023114	-0.07189	-0.147098	-0.223356	0.026068	-0.018606	0.405454	-0.287994	0.06279	0.575288	0.592018			-0.179606	-0.029484	-0.409864	-0.018872	-0.081032	-0.115234	0.383628	0.012922	0.032242	-0.077014	0.122906	0.409248	0.42252	0.03871	-0.196756	1.65424	-1.00148
0.12	0.28651	-0.045052	0.018242	-0.134036	0.010024	0.184198	0.039774	-0.072002	-0.14966	-0.214046	0.031766	0.007308	0.429534	-0.282254	0.044884	0.565418	0.606844			-0.188258	-0.04578	-0.431354	-0.020258	-0.080794	-0.147546	0.413756	0.026754	0.024304	-0.056448	0.112742	0.40551	0.485226	0.049994	-0.185038	1.63316	-1.05155
0.122	0.330708	-0.05572	0.029442	-0.145544	0.016702	0.18669	0.017024	-0.095802	-0.139916	-0.223104	0.022092	0.01841	0.428036	-0.258524	0.063028	0.556682	0.600306			-0.1813	-0.067774	-0.406546	-0.028924	-0.056854	-0.151452	0.407092	0.00567	-0.007756	-0.066346	0.10038	0.419174	0.516712	0.05782	-0.176442	1.61007	-1.05955
0.124	0.33376	-0.048356	0.032284	-0.13447	-9.8e-05	0.196028	-0.008666	-0.062888	-0.191268	-0.22792	0.019852	0.014224	0.407988	-0.253246	0.072044	0.593096	0.598542			-0.206346	-0.05425	-0.429338	-0.022316	-0.059192	-0.138572	0.371574	-0.000322	0.012908	-0.072114	0.113246	0.471506	0.47684	0.066248	-0.169022	1.59517	-1.02336
0.126	0.328188	-0.043666	0.028812	-0.146314	0.01183	0.191968	0.003654	-0.097356	-0.210266	-0.258916	0.025256	0.019418	0.374234	-0.240716	0.033138	0.597408	0.599032			-0.198184	-0.058478	-0.423164	-0.016996	-0.078736	-0.10738	0.385252	0.016814	0.01554	-0.074046	0.113106	0.502502	0.507318	0.046494	-0.175672	1.61984	-0.910798
0.128	0.30506	-0.045416	0.0224	-0.15281	-0.011466	0.204008	0.03276	-0.074704	-0.210308	-0.270984	0.024962	0.042014	0.40782	-0.242228	0.041244	0.585788	0.586012			-0.195314	-0.051758	-0.42469	-0.020244	-0.107534	-0.09562	0.364784	0.018116	0.018046	-0.061194	0.124922	0.503678	0.46319	0.0504	-0.199108	1.69554	-0.966182
0.13	0.327684	-0.047712	0.005306	-0.16142	-0.020678	0.211246	0.07147	-0.09835	-0.188314	-0.266224	0.03304	0.005768	0.411866	-0.276906	0.038766	0.587258	0.562548			-0.129472	-0.06377	-0.443856	-0.0266	-0.068348	-0.114856	0.370888	0.027608	0.040334	-0.067802	0.141582	0.522438	0.452298	0.057624	-0.210112	1.78962	-0.988988
0.132	0.34685	-0.052094	-0.001862	-0.156674	-0.009058	0.229614	0.083398	-0.09219	-0.199458	-0.256284	0.041762	0.01295	0.437374	-0.301056	0.05334	0.565166	0.543872			-0.149086	-0.051534	-0.466004	-0.036036	-0.065142	-0.149072	0.3808	0.012866	0.051002	-0.092862	0.143962	0.481936	0.473046	0.057092	-0.192262	1.8583	-1.00485
0.134	0.35014	-0.039858	-0.006524	-0.158676	0.006426	0.230608	0.069328	-0.101668	-0.152138	-0.256466	0.039858	0.002422	0.495082	-0.311444	0.041958	0.532014	0.621628			-0.171822	-0.024374	-0.49798	-0.043176	-0.059556	-0.178444	0.415618	0.012782	0.05215	-0.100296	0.148918	0.480844	0.501942	0.063994	-0.186872	1.8899	-1.03837
0.136	0.327054	-0.053382	0.017486	-0.148918	0.042056	0.234906	0.03052	-0.10395	-0.193438	-0.254632	0.034664	0.032592	0.512652	-0.32046	0.061306	0.478282	0.668458			-0.207144	-0.012236	-0.490826	-0.03724	-0.051954	-0.178864	0.428652	0.007448	0.01736	-0.086422	0.156618	0.475622	0.552188	0.058114	-0.189392	1.86666	-1.09893
0.138	0.318304	-0.05026	0.027216	-0.15239	0.017234	0.200116	-0.017318	-0.094626	-0.163982	-0.246302	0.03745	0.013006	0.511938	-0.320194	0.03871	0.466844	0.69412			-0.207648	-0.035952	-0.496678	-0.017752	-0.071764	-0.166978	0.461748	0.017444	0.019698	-0.066878	0.151606	0.488362	0.568554	0.062874	-0.223692	1.82844	-1.13239
0.14	0.358204	-0.04375	0.012082	-0.151816	-0.011704	0.185794	-0.044464	-0.086352	-0.214858	-0.251314	0.045948	0.030982	0.506786	-0.291382	0.052976	0.50414	0.750652			-0.211204	-0.045024	-0.50113	-0.013496	-0.070784	-0.134666	0.46879	0.025298	0.02569	-0.058772	0.153286	0.529872	0.56259	0.07112	-0.20755	1.8313	-1.17869
0.142	0.389634	-0.056924	-0.009044	-0.168224	-0.02548	0.216846	-0.07448	-0.093772	-0.184982	-0.267722	0.03346	0.004522	0.458528	-0.276346	0.05432	0.562142	0.704242			-0.204848	-0.087374	-0.49147	-0.007294	-0.079702	-0.125664	0.454286	0.021756	0.028378	-0.086086	0.141582	0.563024	0.545412	0.06958	-0.205828	1.84996	-1.16381
0.144	0.403186	-0.052738	0.01113	-0.162918	-0.013888	0.216874	-0.037226	-0.12075	-0.239008	-0.306516	0.029568	0.018956	0.456918	-0.265972	0.077742	0.53151	0.683466			-0.217728	-0.063266	-0.472864	-0.00651	-0.07686	-0.128828	0.42049	-0.000672	0.03367	-0.092568	0.126378	0.585452	0.531188	0.0644	-0.202622	1.92941	-1.06712
0.146	0.396172	-0.045822	0.02093	-0.163828	-0.032242	0.224294	0.013874	-0.08372	-0.194712	-0.312466	0.033992	-0.009618	0.455224	-0.289282	0.041132	0.520072	0.675598			-0.214844	-0.057624	-0.475902	-0.017052	-0.051856	-0.147154	0.4172	0.00945	0.042168	-0.076692	0.135842	0.58716	0.53298	0.065576	-0.215894	2.01212	-1.07901
0.148	0.367094	-0.047152	0.038024	-0.157598	-0.032298	0.237608	0.021882	-0.068138	-0.216916	-0.319298	0.023884	-0.01582	0.498344	-0.318024	0.093758	0.505316	0.659414			-0.216272	-0.057274	-0.487816	-0.025648	-0.068474	-0.170702	0.4186	0.002408	0.035742	-0.07658	0.138684	0.556136	0.544964	0.062006	-0.256872	2.07481	-1.0919
0.15	0.380618	-0.057344	0.03766	-0.174636	-0.00539	0.234724	0.016926	-0.108696	-0.213206	-0.300412	0.025074	-0.01204	0.535598	-0.338758	0.052766	0.479696	0.629216			-0.138208	-0.059528	-0.491428	-0.033768	-0.062594	-0.191828	0.43568	0.017486	0.04634	-0.09583	0.148456	0.527968	0.561988	0.060438	-0.21756	2.10672	-1.11415
0.152	0.402346	-0.033922	0.011676	-0.178472	0.017472	0.242662	0.010934	-0.117796	-0.197638	-0.295134	0.036932	0.01225	0.551054	-0.354214	0.056658	0.44716	0.690074			-0.179242	-0.05061	-0.533694	-0.033656	-0.04627	-0.183022	0.45185	0.01722	0.07343	-0.095844	0.144578	0.534646	0.595714	0.070994	-0.228228	2.10442	-1.13126
0.154	0.412874	-0.05502	0.014994	-0.188034	0.0189	0.24542	0.00035	-0.109704	-0.194208	-0.308294	0.037856	0.005586	0.566076	-0.352184	0.071134	0.447846	0.734902			-0.176778	-0.02891	-0.551866	-0.028252	-0.075796	-0.210448	0.481936	-0.001134	0.005236	-0.095354	0.150878	0.541982	0.59689	0.068698	-0.222306	2.08834	-1.21099
0.156	0.400876	-0.082082	-0.007518	-0.178066	-0.005796	0.265916	-0.020874	-0.107436	-0.223692	-0.306796	0.046704	-0.000882	0.490798	-0.327278	0.065184	0.476994	0.791854			-0.194684	-0.04935	-0.563584	-0.023086	-0.06846	-0.178346	0.480382	-0.010416	-0.00763	-0.073206	0.16562	0.604394	0.599452	0.069104	-0.23828	2.06308	-1.25859
0.158	0.410648	-0.066234	0.015736	-0.18151	-0.021336	0.25928	0.00308	-0.090902	-0.228046	-0.298676	0.046046	0.00917	0.511574	-0.30695	0.098896	0.486528	0.835198			-0.168966	-0.038598	-0.56329	-0.007238	-0.09506	-0.188412	0.490518	0.008218	-0.002394	-0.061236	0.179606	0.629552	0.58968	0.064764	-0.254744	2.07206	-1.26357
0.16	0.43232	-0.057288	0.0427	-0.18298	-0.029974	0.275366	0.043036	-0.096404	-0.242956	-0.326158	0.051226	0.000952	0.505792	-0.314104	0.098084	0.477708	0.811132			-0.183722	-0.068292	-0.569548	-0.008428	-0.110894	-0.141848	0.481824	0.033628	0.001176	-0.056098	0.180404	0.639394	0.552188	0.06769	-0.216566	2.08582	-1.22538
0.162	0.455448	-0.051198	0.029148	-0.185626	-0.015022	0.245812	0.046522	-0.122626	-0.260666	-0.335566	0.060116	-0.031024	0.522228	-0.326494	0.095186	0.427168	0.79989			-0.168938	-0.071708	-0.545594	-0.014994	-0.098294	-0.136192	0.46326	0.046522	0.018494	-0.080234	0.17745	0.655956	0.578648	0.074382	-0.232778	2.16423	-1.14647
0.164	0.453642	-0.06265	0.016338	-0.18361	-0.01232	0.254212	0.077574	-0.093632	-0.22897	-0.365036	0.042392	0.000742	0.530936	-0.348236	0.083342	0.40789	0.80171			-0.167412	-0.080822	-0.546854	-0.01827	-0.088004	-0.173838	0.462784	0.019432	0.01939	-0.092736	0.162624	0.63238	0.586348	0.075194	-0.234696	2.24788	-1.1366
0.166	0.467124	-0.083608	-0.02366	-0.188006	-0.022162	0.253988	0.069426	-0.117348	-0.227304	-0.342496	0.042364	-0.011648	0.573636	-0.371532	0.070042	0.37709	0.790902			-0.163562	-0.090552	-0.545776	-0.012712	-0.054152	-0.220514	0.476742	0.015932	0.074256	-0.073122	0.154532	0.591192	0.624526	0.069986	-0.246218	2.28386	-1.17921
0.168	0.43358	-0.058884	-0.029652	-0.188692	0.005502	0.267428	0.015806	-0.110964	-0.233772	-0.349734	0.044604	0.00637	0.583324	-0.389466	0.045094	0.353892	0.80542			-0.164458	-0.074718	-0.557704	-0.009884	-0.06972	-0.217966	0.489636	0.01407	0.036666	-0.08673	0.156898	0.601734	0.667716	0.06769	-0.256368	2.31637	-1.19321
0.17	0.452298	-0.035994	-0.017584	-0.196518	-0.007882	0.27398	-0.02667	-0.113218	-0.24206	-0.33964	0.03136	0.027664	0.606382	-0.393022	0.078484	0.317114	0.803572			-0.13643	-0.054334	-0.562646	-0.015526	-0.083342	-0.194544	0.540694	0.000336	0.053872	-0.088872	0.165284	0.61866	0.69685	0.064974	-0.264838	2.26958	-1.19319
0.172	0.466508	-0.068446	0.005824	-0.201796	-0.010458	0.28329	-0.057778	-0.12026	-0.195076	-0.336126	0.037016	-0.003304	0.575484	-0.387296	0.087094	0.341586	0.90468			-0.128702	-0.042966	-0.5922	-0.01946	-0.092708	-0.163212	0.53522	0.02156	0.01652	-0.091658	0.157584	0.666666	0.640514	0.075852	-0.23765	2.24678	-1.25979
0.174	0.477596	-0.09534	-0.004102	-0.203574	-0.01715	0.311864	-0.044394	-0.123242	-0.248136	-0.326494	0.044478	0.008246	0.525882	-0.355054	0.124124	0.344974	0.953876			-0.146888	-0.081676	-0.623126	-0.022568	-0.088466	-0.162764	0.534422	0.022218	0.019418	-0.07819	0.167986	0.710164	0.669214	0.083496	-0.240758	2.24826	-1.30729
0.176	0.453096	-0.0763	-0.004732	-0.203028	-0.016954	0.314202	0.004494	-0.138838	-0.244496	-0.3549	0.047208	-0.015848	0.52745	-0.363412	0.087332	0.355586	1.02164			-0.154938	-0.06608	-0.599872	-0.028196	-0.103138	-0.199878	0.518252	0.008862	0.028112	-0.07077	0.175364	0.736974	0.677054	0.077168	-0.252112	2.26967	-1.32926
0.178	0.43862	-0.06006	0.039606	-0.189406	-0.016562	0.318094	0.058786	-0.117684	-0.233366	-0.354018	0.053424	-0.05292	0.560252	-0.350616	0.11907	0.34461	0.960064			-0.155848	-0.068978	-0.618296	-0.029274	-0.107422	-0.193018	0.50106	0.023254	0.04809	-0.086128	0.183652	0.709576	0.652736	0.0707	-0.31843	2.30735	-1.33396
0.18	0.48755	-0.069482	0.063924	-0.200844	0.0126	0.308602	0.092484	-0.104398	-0.265118	-0.356132	0.0574	-0.041692	0.591962	-0.37198	0.048972	0.295932	0.919534			-0.13468	-0.057498	-0.622328	-0.016744	-0.106568	-0.212814	0.5096	0.025382	0.039382	-0.074718	0.20083	0.682206	0.640094	0.070602	-0.274582	2.35876	-1.23561
0.182	0.534436	-0.059416	0.054978	-0.198926	0.00028	0.270186	0.100856	-0.122346	-0.263116	-0.365708	0.06335	-0.037618	0.612794	-0.387674	0.078638	0.253372	0.909496			-0.151074	-0.061152	-0.637448	0.00056	-0.099218	-0.184198	0.509796	0.039116	0.060004	-0.09156	0.207844	0.679308	0.697144	0.078554	-0.273798	2.4178	-1.23116
0.184	0.539826	-0.079842	0.0476	-0.210728	0.00203	0.297836	0.089586	-0.143598	-0.287126	-0.367822	0.063966	-0.013706	0.639338	-0.419664	0.070014	0.20412	0.903546			-0.122724	-0.06503	-0.613984	-0.005404	-0.070112	-0.197442	0.518826	0.044184	0.100506	-0.08974	0.194138	0.663852	0.70959	0.08358	-0.241206	2.5076	-1.2714
0.186	0.519694	-0.075236	0.020356	-0.211064	-0.002296	0.278796	0.099876	-0.129458	-0.27699	-0.345548	0.05698	0.00105	0.62643	-0.432992	0.12621	0.179718	0.894726			-0.105784	-0.079156	-0.603638	-0.007406	-0.057204	-0.19768	0.521206	0.020146	0.040712	-0.10052	0.1806	0.699146	0.737254	0.082516	-0.29379	2.50998	-1.26986
0.188	0.50764	-0.063994	0.025746	-0.21371	-0.010486	0.292866	0.05208	-0.103502	-0.244832	-0.362264	0.056154	-0.009268	0.601258	-0.43526	0.096698	0.173978	0.968954			-0.122514	-0.048258	-0.617624	-0.023912	-0.064904	-0.20944	0.540946	0.014182	0.068082	-0.08442	0.18011	0.735742	0.72044	0.083524	-0.262262	2.50947	-1.3055
0.19	0.52731	-0.049266	0.00483	-0.20566	-0.010962	0.287028	0.032088	-0.144494	-0.245126	-0.371868	0.056742	-0.022316	0.559706	-0.419048	0.09128	0.191814	1.03967			-0.137116	-0.023968	-0.613032	-0.027272	-0.090202	-0.201768	0.580342	0.030282	0.034594	-0.091546	0.179606	0.787262	0.727412	0.088494	-0.249452	2.46165	-1.35929
0.192	0.524902	-0.072562	0.046172	-0.221732	-0.023716	0.300314	0.031332	-0.139552	-0.258538	-0.37135	0.052752	-0.041902	0.577052	-0.399616	0.077882	0.184226	1.11357			-0.136066	-0.051408	-0.646464	-0.035028	-0.066542	-0.242424	0.581476	0.023534	0.023646	-0.0952	0.186886	0.814828	0.74011	0.084868	-0.279496	2.43352	-1.37427
0.194	0.53018	-0.099078	0.041034	-0.219758	-0.009576	0.351764	0.022456	-0.14686	-0.25494	-0.366352	0.043764	-0.073584	0.595784	-0.381682	0.082866	0.200424	1.17708			-0.132888	-0.068614	-0.667282	-0.03332	-0.109592	-0.252056	0.56742	0.029148	0.043218	-0.070196	0.1687	0.80598	0.720818	0.08764	-0.281372	2.45668	-1.39611
0.196	0.534492	-0.09611	0.048454	-0.235788	-0.018592	0.340634	0.050694	-0.149772	-0.30072	-0.38143	0.052808	-0.055482	0.596582	-0.392756	0.087696	0.20657	1.1326			-0.127526	-0.067466	-0.66101	-0.032116	-0.09975	-0.272566	0.56329	0.034888	0.058814	-0.117362	0.180236	0.763854	0.739018	0.093184	-0.28924	2.43705	-1.38079
0.198	0.543732	-0.07434	0.064372	-0.23184	-0.00539	0.343924	0.077756	-0.12922	-0.284886	-0.388234	0.066052	-0.084868	0.662928	-0.42392	0.104006	0.140686	1.0535			-0.126252	-0.08939	-0.664482	-0.023954	-0.101738	-0.280658	0.557746	0.027972	0.031934	-0.11809	0.190806	0.760396	0.780108	0.089446	-0.289744	2.49704	-1.32887
0.2	0.561372	-0.067186	0.094094	-0.22785	-0.014336	0.333102	0.066472	-0.123606	-0.295848	-0.40159	0.067004	-0.03234	0.65856	-0.45486	0.097734	0.085442	1.09687			-0.128422	-0.068474	-0.66185	-0.007504	-0.075824	-0.251804	0.553448	0.046032	0.05824	-0.124236	0.211106	0.753424	0.821982	0.096978	-0.27601	2.55429	-1.28412
0.202	0.595308	-0.078638	0.105658	-0.219968	-0.00931	0.32263	0.074578	-0.15085	-0.27923	-0.37114	0.075376	-0.044478	0.664412	-0.466088	0.091252	0.030044	1.11971			-0.102998	-0.089908	-0.654962	-0.003108	-0.060438	-0.232232	0.588406	0.053018	0.050722	-0.13643	0.215516	0.789404	0.833728	0.097636	-0.271124	2.62549	-1.3006
0.204	0.61537	-0.09065	0.091448	-0.234024	-0.021224	0.318052	0.103852	-0.132342	-0.294532	-0.390894	0.069706	-0.041916	0.631974	-0.464968	0.088396	-0.018606	1.07405			-0.11158	-0.090034	-0.651462	-0.007238	-0.069244	-0.2457	0.6013	0.034818	0.048398	-0.12971	0.219338	0.799932	0.830018	0.105434	-0.290136	2.68307	-1.34046
0.206	0.589078	-0.07168	0.070658	-0.224728	-0.01484	0.29204	0.08974	-0.14469	-0.27972	-0.38276	0.071694	-0.034356	0.6153	-0.473844	0.09527	-0.03059	1.12662			-0.098392	-0.093492	-0.654388	-0.020832	-0.053228	-0.244524	0.614208	0.009968	0.060732	-0.125776	0.21777	0.8582	0.83265	0.106624	-0.333956	2.68523	-1.36277
0.208	0.556136	-0.074816	0.0658	-0.22274	0.000448	0.320054	0.065072	-0.136052	-0.256214	-0.384734	0.066416	-0.038136	0.619682	-0.461902	0.093674	0.013846	1.19671			-0.136738	-0.07203	-0.666848	-0.019754	-0.075418	-0.245882	0.59486	0.016562	0.04375	-0.14259	0.209048	0.9023	0.814086	0.10794	-0.299278	2.63683	-1.38757
0.21	0.577332	-0.084224	0.073374	-0.235634	-0.012236	0.308252	0.036666	-0.151116	-0.270564	-0.384174	0.068572	-0.070728	0.639478	-0.449092	0.084784	0.01792	1.23967			-0.130354	-0.06818	-0.670502	-0.01533	-0.08008	-0.226156	0.62391	0.017948	0.042434	-0.128394	0.201236	0.84301	0.804748	0.10458	-0.305746	2.67541	-1.4132
0.212	0.60774	-0.074494	0.09835	-0.24241	-0.003094	0.35609	0.043288	-0.16079	-0.292558	-0.372568	0.073794	-0.07238	0.661864	-0.429086	0.081382	0.031738	1.33409			-0.13755	-0.06965	-0.690998	-0.020034	-0.098714	-0.263466	0.628992	0.034832	0.03276	-0.100464	0.197218	0.847896	0.819462	0.097916	-0.31955	2.62459	-1.46313
0.214	0.5824	-0.08351	0.109382	-0.248584	-0.026488	0.367346	0.032844	-0.15134	-0.302904	-0.393036	0.067326	-0.05579	0.671132	-0.439446	0.084112	-0.00357	1.36577			-0.126266	-0.085722	-0.700476	-0.026026	-0.091028	-0.281778	0.6321	0.023366	0.04459	-0.109816	0.185794	0.826812	0.840294	0.099624	-0.29834	2.62216	-1.44173
0.216	0.606774	-0.069482	0.108304	-0.250432	-0.01358	0.365554	0.058338	-0.148862	-0.30478	-0.417172	0.05271	-0.034146	0.70476	-0.454412	0.080948	-0.040698	1.21944			-0.07238	-0.083188	-0.721756	-0.036666	-0.063728	-0.285222	0.602784	0.001218	0.026642	-0.138572	0.186732	0.816228	0.87584	0.109816	-0.305102	2.63406	-1.39933
0.218	0.59486	-0.069846	0.174804	-0.237482	-0.015946	0.360864	0.09562	-0.152656	-0.305704	-0.417802	0.055286	-0.044856	0.711032	-0.501592	0.11445	-0.090748	1.21538			-0.050876	-0.103642	-0.716436	-0.037352	-0.063742	-0.330008	0.605892	0.01428	0.063616	-0.125972	0.197134	0.85869	0.908068	0.113232	-0.355894	2.70983	-1.35516
0.22	0.603288	-0.070994	0.189448	-0.23268	-0.03969	0.363384	0.089418	-0.140378	-0.274876	-0.411754	0.061978	-0.051702	0.708498	-0.5089	0.097384	-0.121674	1.22077			-0.064946	-0.080696	-0.705488	-0.02541	-0.03696	-0.31843	0.594188	0.03325	0.068936	-0.124936	0.205632	0.901992	0.88879	0.113204	-0.29666	2.72969	-1.38114
0.222	0.652624	-0.079912	0.172788	-0.239624	-0.031024	0.366534	0.089306	-0.14854	-0.283066	-0.425376	0.074564	-0.062342	0.640682	-0.516236	0.085414	-0.148694	1.20833			-0.088494	-0.088004	-0.704102	-0.018522	-0.06461	-0.273574	0.61649	0.039326	0.07749	-0.123606	0.22351	0.925498	0.890204	0.117264	-0.327628	2.81106	-1.3921
0.224	0.668458	-0.068754	0.15869	-0.24045	-0.0336	0.357336	0.113372	-0.154868	-0.2604	-0.409822	0.079478	-0.07217	0.658462	-0.49847	0.072352	-0.107324	1.24772			-0.11424	-0.081354	-0.720118	-0.007084	-0.065296	-0.23744	0.658812	0.034314	0.088256	-0.107198	0.221214	0.963592	0.895146	0.120246	-0.346164	2.84196	-1.38348
0.226	0.678048	-0.077476	0.105056	-0.2506	-0.028056	0.350028	0.114772	-0.14686	-0.23079	-0.408114	0.072646	-0.120344	0.676032	-0.479962	0.071904	-0.140182	1.35029			-0.142394	-0.048818	-0.730072	-0.012334	-0.080416	-0.253078	0.661514	0.023086	0.060438	-0.120022	0.2275	0.942732	0.892402	0.110796	-0.335034	2.92676	-1.42993
0.228	0.606662	-0.06104	0.108836	-0.256648	-0.021392	0.348516	0.09625	-0.163086	-0.263648	-0.419552	0.078344	-0.102298	0.692692	-0.471562	0.07959	-0.143472	1.37277			-0.161686	-0.044058	-0.73808	-0.016408	-0.095242	-0.290864	0.674058	0.022414	0.061068	-0.127596	0.23744	0.92673	0.888776	0.110712	-0.338884	2.80606	-1.50363
0.23	0.604072	-0.105196	0.129276	-0.254324	-0.019712	0.351582	0.055244	-0.16681	-0.279888	-0.426706	0.0847	-0.093072	0.715414	-0.48503	0.096768	-0.229236	1.46821			-0.23086	-0.059934	-0.740656	-0.021196	-0.08351	-0.327152	0.67949	0.003388	0.047054	-0.1267	0.23051	0.90573	0.927164	0.116634	-0.322406	2.79601	-1.50665
0.232	0.59745	-0.083132	0.163072	-0.246862	-0.053508	0.356496	0.02877	-0.176358	-0.29029	-0.420784	0.086324	-0.052976	0.730688	-0.505008	0.129976	-0.236642	1.50853			-0.212492	-0.083538	-0.752458	-0.019586	-0.110348	-0.337862	0.696724	0.020258	0.06314	-0.133028	0.238686	0.867608	0.937062	0.121002	-0.3682	2.77595	-1.50459
0.234	0.633444	-0.073416	0.204148	-0.256326	-0.038738	0.39396	0.029442	-0.17864	-0.307244	-0.441686	0.0847	-0.090384	0.739774	-0.524678	0.095102	-0.197792	1.39682			-0.198226	-0.101388	-0.767466	-0.042966	-0.09646	-0.31262	0.695618	0.04095	0.053718	-0.156618	0.224056	0.912156	1.00194	0.125776	-0.339388	2.8279	-1.48586
0.236	0.631246	-0.088984	0.241052	-0.27027	-0.008988	0.381738	0.034132	-0.169498	-0.298438	-0.45136	0.0805	-0.09884	0.749798	-0.55006	0.078722	-0.146692	1.31817			-0.14371	-0.116256	-0.774564	-0.029246	-0.08309	-0.28406	0.687414	0.001596	0.060606	-0.129276	0.213164	0.955766	1.00008	0.131306	-0.33425	2.89325	-1.48065
0.238	0.644378	-0.092624	0.251216	-0.26313	-0.049602	0.39704	0.057764	-0.1505	-0.294196	-0.432992	0.064414	-0.077938	0.705432	-0.553868	0.085582	-0.130494	1.39978			-0.125468	-0.1218	-0.769104	-0.034426	-0.058996	-0.284998	0.694484	0.004592	0.073836	-0.150948	0.207578	0.98301	0.949326	0.129626	-0.33978	2.92628	-1.4586
0.24	0.65569	-0.084294	0.245504	-0.261772	-0.035028	0.403662	0.063336	-0.164136	-0.287686	-0.434686	0.07	-0.06167	0.713636	-0.563472	0.080724	-0.163744	1.42353			-0.127666	-0.12061	-0.760172	-0.02002	-0.062118	-0.294084	0.672728	0.027146	0.084966	-0.16233	0.22393	1.00426	0.979482	0.13146	-0.333018	2.93912	-1.47578
0.242	0.677684	-0.077504	0.226184	-0.265664	-0.041188	0.406434	0.084938	-0.165956	-0.282226	-0.449008	0.074774	-0.110544	0.712418	-0.543914	0.098686	-0.235858	1.39898			-0.124306	-0.09947	-0.763672	-0.00525	-0.08722	-0.314426	0.68138	0.021266	0.06398	-0.130844	0.231798	1.00442	0.966742	0.13006	-0.337386	2.93959	-1.46623
0.244	0.676088	-0.067788	0.184282	-0.267386	-0.04788	0.359044	0.102242	-0.167216	-0.283626	-0.455084	0.083314	-0.095508	0.71456	-0.534184	0.099918	-0.28322	1.48481			-0.158634	-0.092176	-0.758156	-0.014574	-0.10255	-0.326186	0.692594	0.021504	0.067284	-0.147112	0.23863	0.973378	0.966238	0.139608	-0.354494	2.89824	-1.47493
0.246	0.715428	-0.071078	0.17689	-0.26208	-0.039564	0.357938	0.088578	-0.163324	-0.261142	-0.458472	0.089362	-0.104608	0.738122	-0.519162	0.106498	-0.305158	1.53629			-0.203826	-0.045962	-0.784938	-0.02828	-0.09485	-0.321062	0.716114	0.03143	0.039172	-0.133742	0.233814	0.951818	0.985096	0.1323	-0.338464	2.91012	-1.50773
0.248	0.63294	-0.098504	0.180964	-0.271194	-0.025214	0.38206	0.097132	-0.167342	-0.305578	-0.445354	0.085316	-0.059402	0.784014	-0.514066	0.089992	-0.295596	1.58025			-0.22883	-0.080696	-0.806176	-0.051856	-0.100884	-0.316372	0.74403	-0.000336	0.031388	-0.141498	0.240002	0.969402	1.01769	0.129066	-0.362054	2.91101	-1.59561
0.25	0.661136	-0.088452	0.194124	-0.281568	-0.022078	0.37429	0.062874	-0.18515	-0.31003	-0.447356	0.09485	-0.066346	0.786072	-0.547722	0.112476	-0.23093	1.62022			-0.258482	-0.12509	-0.79611	-0.043316	-0.08323	-0.32725	0.729218	0.002142	0.03346	-0.188384	0.248304	0.96579	1.07153	0.123774	-0.360878	2.94168	-1.59716
0.252	0.6685	-0.08519	0.24948	-0.290486	-0.02436	0.377664	0.084406	-0.201796	-0.326606	-0.454048	0.104384	-0.079142	0.769076	-0.568176	0.093632	-0.249564	1.61214			-0.216832	-0.108192	-0.813036	-0.044282	-0.116774	-0.33096	0.743652	0.016142	0.040978	-0.200564	0.25571	1.03585	1.05372	0.136346	-0.368004	3.00125	-1.57254
0.254	0.685762	-0.083622	0.266686	-0.297052	-0.017724	0.381136	0.03633	-0.189378	-0.355418	-0.460796	0.10724	-0.089754	0.668416	-0.587734	0.051898	-0.327964	1.52599			-0.155078	-0.109116	-0.806736	-0.038626	-0.092554	-0.345506	0.757064	0.034762	0.024262	-0.190666	0.25767	1.07288	1.06176	0.14364	-0.383068	3.04615	-1.54252
0.256	0.69839	-0.078638	0.292642	-0.289968	-0.042378	0.39333	0.056028	-0.175392	-0.334264	-0.454636	0.090804	-0.110026	0.743288	-0.60249	0.076482	-0.365876	1.53678			-0.102144	-0.113806	-0.807744	-0.040796	-0.068362	-0.341782	0.751058	0.024066	0.045402	-0.191534	0.233982	1.06704	1.05043	0.148204	-0.379946	3.08185	-1.51658
0.258	0.714588	-0.091504	0.25571	-0.28357	-0.020146	0.411152	0.053466	-0.18809	-0.324408	-0.47117	0.080038	-0.107632	0.737282	-0.58695	0.087318	-0.428344	1.53812			-0.10472	-0.115878	-0.805098	-0.045598	-0.0826	-0.37828	0.73262	0.008386	0.055776	-0.170744	0.219184	1.05203	1.02283	0.14721	-0.391118	3.06667	-1.54739
0.26	0.725858	-0.095536	0.271852	-0.285992	-0.023422	0.398132	0.08148	-0.192486	-0.30632	-0.479668	0.08456	-0.100926	0.781368	-0.56987	0.088452	-0.458248	1.51698			-0.163114	-0.10206	-0.82334	-0.043974	-0.073388	-0.390978	0.731892	0.0203	0.066024	-0.130144	0.223426	1.04325	1.02593	0.137872	-0.376012	3.07222	-1.56733
0.262	0.697018	-0.064274	0.253162	-0.271586	-0.039018	0.389872	0.086492	-0.178654	-0.321874	-0.488474	0.077112	-0.085792	0.792848	-0.558894	0.09555	-0.441602	1.56031			-0.22393	-0.106064	-0.801346	-0.027524	-0.115556	-0.417088	0.720398	0.036764	0.058072	-0.142716	0.241388	1.0257	1.09172	0.139076	-0.347676	3.06396	-1.5518
0.264	0.68691	-0.072226	0.246414	-0.285544	-0.034748	0.396844	0.084014	-0.190274	-0.294728	-0.455392	0.087528	-0.083622	0.812168	-0.558138	0.092288	-0.36134	1.6367			-0.268114	-0.049952	-0.796096	-0.023618	-0.11648	-0.37842	0.74907	0.034398	0.045388	-0.152012	0.240002	1.01934	1.09012	0.142058	-0.378224	3.05159	-1.58458
0.266	0.666316	-0.083006	0.273616	-0.284228	-0.032326	0.374696	0.086898	-0.170954	-0.327404	-0.441644	0.094556	-0.080528	0.825622	-0.569492	0.07609	-0.382298	1.72368			-0.29939	-0.04312	-0.843556	-0.03535	-0.121898	-0.359324	0.741664	0.039634	0.043498	-0.179914	0.247506	1.03263	1.13266	0.147294	-0.400106	3.09953	-1.61606
0.268	0.692048	-0.095816	0.28182	-0.299278	-0.036358	0.412356	0.082656	-0.214466	-0.356636	-0.470582	0.095382	-0.1078	0.816788	-0.603582	0.049448	-0.419412	1.72497			-0.247828	-0.10227	-0.841372	-0.042084	-0.113526	-0.336364	0.780948	0.005236	0.037954	-0.20972	0.25151	1.06775	1.11759	0.152096	-0.416206	3.11343	-1.594
0.27	0.711732	-0.09576	0.2905	-0.309736	-0.02268	0.404796	0.085274	-0.206108	-0.362138	-0.463148	0.10829	-0.100366	0.7469	-0.632562	0.079212	-0.481852	1.65361			-0.21574	-0.093366	-0.851858	-0.044996	-0.091882	-0.339962	0.77805	-0.011046	0.025214	-0.210448	0.263704	1.1107	1.12095	0.149968	-0.406462	3.17432	-1.60952
0.272	0.750652	-0.07945	0.29764	-0.31087	-0.022456	0.39494	0.046914	-0.231378	-0.377188	-0.51121	0.109886	-0.12936	0.772604	-0.644336	0.059206	-0.572166	1.6451			-0.167538	-0.084168	-0.861742	-0.050988	-0.088788	-0.399518	0.824698	0.002856	0.0427	-0.18837	0.273546	1.12787	1.11362	0.158662	-0.456456	3.20635	-1.56356
0.274	0.73815	-0.086324	0.351134	-0.305046	-0.025606	0.410368	0.02233	-0.205156	-0.358232	-0.52192	0.119784	-0.1407	0.790062	-0.644168	0.067802	-0.620004	1.61245			-0.137172	-0.112574	-0.826952	-0.049154	-0.078428	-0.420658	0.831474	0.028392	0.075026	-0.187866	0.270844	1.11287	1.0829	0.161154	-0.395262	3.2299	-1.58126
0.276	0.747796	-0.104188	0.3493	-0.309036	-0.01589	0.406658	0.039564	-0.18921	-0.368886	-0.517216	0.109816	-0.12817	0.82131	-0.630294	0.073388	-0.695772	1.62121			-0.167818	-0.099078	-0.840448	-0.066318	-0.09002	-0.397866	0.844242	0.012096	0.054992	-0.158242	0.254492	1.08396	1.1166	0.158228	-0.406308	3.2737	-1.57553
0.278	0.750876	-0.094906	0.33782	-0.304598	-0.028378	0.44009	0.012026	-0.183806	-0.351106	-0.524608	0.095494	-0.107254	0.843206	-0.612444	0.068152	-0.621124	1.6381			-0.207564	-0.124026	-0.868406	-0.067648	-0.083132	-0.406392	0.828884	0.01582	0.065128	-0.16667	0.245812	1.0898	1.16119	0.157416	-0.410718	3.19158	-1.59173
0.28	0.723744	-0.099862	0.331058	-0.314678	-0.014588	0.436394	0.047096	-0.187236	-0.343364	-0.53767	0.094472	-0.078484	0.888608	-0.60081	0.08176	-0.643846	1.70299			-0.237552	-0.118384	-0.868742	-0.0525	-0.116676	-0.377062	0.813624	-0.001302	0.073038	-0.179004	0.24143	1.09452	1.15496	0.158284	-0.401492	3.16859	-1.60936
0.282	0.69587	-0.085316	0.29232	-0.311906	-0.023744	0.436562	0.082866	-0.203798	-0.365414	-0.502796	0.094864	-0.09702	0.856184	-0.602406	0.065324	-0.597856	1.77289			-0.28994	-0.093422	-0.876722	-0.029722	-0.115332	-0.35574	0.799792	0.028378	0.022246	-0.221844	0.254604	1.11894	1.19571	0.148372	-0.424914	3.15277	-1.62806
0.284	0.665378	-0.068432	0.310002	-0.32151	-0.036848	0.448938	0.084546	-0.189812	-0.355922	-0.490154	0.08015	-0.106652	0.86541	-0.625086	0.049798	-0.59493	1.84463			-0.301994	-0.059248	-0.87465	-0.022792	-0.09765	-0.380772	0.816592	0.021126	0.019782	-0.215614	0.262248	1.1664	1.1814	0.16072	-0.430402	3.19414	-1.63908
0.286	0.724654	-0.10878	0.33775	-0.317576	-0.035546	0.431228	0.094248	-0.186984	-0.367248	-0.50239	0.091364	-0.106064	0.796068	-0.653366	0.064106	-0.636566	1.7956			-0.270116	-0.054628	-0.88977	-0.044604	-0.11557	-0.38941	0.836346	0.026208	0.029848	-0.199864	0.25921	1.17807	1.20424	0.158648	-0.434042	3.21973	-1.62957
0.288	0.764484	-0.124194	0.33369	-0.318094	-0.000112	0.41328	0.093072	-0.196252	-0.363174	-0.530838	0.09408	-0.149268	0.823802	-0.680806	0.062846	-0.714742	1.73942			-0.232372	-0.089488	-0.904792	-0.060438	-0.10605	-0.396046	0.844718	0.02695	0.044128	-0.17213	0.252966	1.19518	1.20424	0.16912	-0.429198	3.26172	-1.59334
0.29	0.781522	-0.101486	0.353962	-0.319424	-0.02828	0.416318	0.097524	-0.212226	-0.384034	-0.547372	0.105294	-0.125468	0.842422	-0.683676	0.068558	-0.789614	1.71555			-0.21378	-0.093772	-0.890554	-0.073626	-0.059948	-0.396718	0.867202	0.013188	0.01323	-0.164206	0.269906	1.15808	1.15479	0.17878	-0.408072	3.30218	-1.59081
0.292	0.795144	-0.096796	0.388808	-0.328132	-0.02933	0.423024	0.121758	-0.240744	-0.400232	-0.56091	0.120624	-0.132608	0.871038	-0.679196	0.06531	-0.820876	1.73667			-0.196336	-0.120624	-0.875686	-0.054782	-0.072772	-0.39235	0.86849	-0.007504	0.014602	-0.154308	0.287882	1.14941	1.17222	0.178108	-0.415576	3.32233	-1.63255
0.294	0.766374	-0.079002	0.422282	-0.33236	-0.025144	0.42336	0.08183	-0.221858	-0.399924	-0.558516	0.122388	-0.09562	0.89537	-0.644294	0.07504	-0.845446	1.7621			-0.187138	-0.125272	-0.89558	-0.049154	-0.094234	-0.38311	0.89054	-0.003472	0.038164	-0.176148	0.292572	1.131	1.21895	0.174006	-0.441476	3.26288	-1.63181
0.296	0.749224	-0.095592	0.443072	-0.330022	-0.014714	0.431144	0.0861	-0.196532	-0.397194	-0.546336	0.120988	-0.105224	0.912338	-0.63819	0.076174	-0.847784	1.75428			-0.223986	-0.121254	-0.876456	-0.051674	-0.089166	-0.392714	0.923958	0.046256	0.02534	-0.207466	0.29673	1.1577	1.25507	0.174958	-0.454482	3.25807	-1.62336
0.298	0.75551	-0.099358	0.412034	-0.334138	-0.03801	0.435134	0.044632	-0.214312	-0.392196	-0.537054	0.11473	-0.118944	0.946428	-0.631764	0.071022	-0.805014	1.85517			-0.24885	-0.133252	-0.878682	-0.051716	-0.097398	-0.397684	0.924588	0.027944	0.035098	-0.209972	0.280504	1.20201	1.27273	0.169078	-0.45724	3.2544	-1.647
0.3	0.79037	-0.112966	0.373478	-0.33313	-0.03346	0.460502	0.03647	-0.211708	-0.367794	-0.539364	0.107226	-0.129388	0.919324	-0.653828	0.061754	-0.861798	1.95056			-0.255444	-0.097244	-0.895202	-0.043176	-0.107086	-0.425446	0.913948	0.029708	0.030072	-0.225288	0.266728	1.23789	1.26785	0.16828	-0.46137	3.35342	-1.64909
0.302	0.765212	-0.080304	0.383684	-0.32879	-0.039018	0.460754	0.078988	-0.217882	-0.402962	-0.55664	0.102368	-0.13664	0.828758	-0.688534	0.051702	-0.831726	1.98845			-0.267008	-0.08162	-0.895608	-0.032116	-0.091154	-0.433636	0.90349	0.006636	0.013664	-0.216174	0.273518	1.27117	1.27639	0.178248	-0.481236	3.28639	-1.63345
0.304	0.804538	-0.104874	0.382746	-0.328818	-0.04634	0.447272	0.12397	-0.21385	-0.414372	-0.558516	0.108892	-0.153902	0.878668	-0.709408	0.079268	-0.898366	1.91001			-0.251342	-0.04725	-0.90657	-0.031878	-0.11963	-0.429184	0.883848	0.010654	0.02779	-0.191912	0.265286	1.25689	1.25224	0.177996	-0.496342	3.34401	-1.62877
0.306	0.819686	-0.108416	0.421204	-0.332388	-0.039998	0.462112	0.137984	-0.210896	-0.416192	-0.562898	0.099848	-0.178486	0.913052	-0.726152	0.080388	-0.965636	1.84929			-0.202328	-0.092498	-0.921116	-0.032942	-0.103012	-0.43736	0.882434	0.027678	0.019572	-0.183078	0.2744	1.23946	1.24436	0.18886	-0.44877	3.38008	-1.57342
0.308	0.835954	-0.111314	0.468888	-0.34846	-0.037562	0.44632	0.133252	-0.211876	-0.43323	-0.570738	0.095494	-0.18347	0.91063	-0.719698	0.082796	-1.00867	1.87403			-0.20678	-0.119	-0.925806	-0.058968	-0.108318	-0.425054	0.903028	0.02723	0.032676	-0.179046	0.277256	1.21758	1.24506	0.191506	-0.455504	3.3887	-1.6295
0.31	0.818258	-0.109466	0.452102	-0.363412	-0.032858	0.4515	0.139706	-0.24472	-0.43764	-0.578284	0.107702	-0.132916	0.9289	-0.711298	0.072366	-1.06399	1.88315			-0.206542	-0.125258	-0.919156	-0.073612	-0.075754	-0.421708	0.908152	0.003892	0.034986	-0.163128	0.27895	1.2146	1.29833	0.192906	-0.468034	3.40815	-1.65613
0.312	0.795914	-0.103488	0.484288	-0.37135	-0.02618	0.44751	0.145866	-0.247772	-0.42287	-0.578046	0.118692	-0.135296	0.966826	-0.690102	0.082894	-1.08007	1.86323			-0.184142	-0.107786	-0.923356	-0.056994	-0.087892	-0.427336	0.95914	-0.015162	0.059668	-0.20307	0.298536	1.22797	1.33036	0.190988	-0.466494	3.38583	-1.65763
0.314	0.80556	-0.072296	0.465248	-0.365008	-0.021098	0.440664	0.136556	-0.230188	-0.427826	-0.554078	0.12754	-0.14602	0.989548	-0.685692	0.086702	-1.0416	1.94446			-0.232456	-0.09933	-0.91896	-0.064722	-0.09737	-0.441392	0.9646	0.015064	0.080416	-0.212996	0.300818	1.27628	1.35369	0.18326	-0.494578	3.39149	-1.67182
0.316	0.804692	-0.10269	0.479528	-0.351022	-0.055188	0.44254	0.085092	-0.232526	-0.419748	-0.561834	0.125958	-0.149912	0.966364	-0.693924	0.065954	-1.03055	2.05183			-0.2562	-0.122892	-0.917644	-0.064106	-0.125874	-0.440594	0.946554	0.011508	0.057918	-0.205492	0.305326	1.31016	1.33582	0.180824	-0.487564	3.35111	-1.66417
0.318	0.825356	-0.104706	0.45157	-0.358372	-0.03339	0.473242	0.0637	-0.210532	-0.4193	-0.565558	0.128926	-0.159292	0.918848	-0.720678	0.084462	-1.04149	2.12017			-0.257908	-0.134162	-0.936852	-0.06895	-0.111608	-0.460866	0.981764	0.023324	0.0448	-0.211974	0.30933	1.33801	1.34658	0.189756	-0.488978	3.34965	-1.6624
0.32	0.851634	-0.101752	0.427952	-0.361088	-0.042448	0.479808	0.071176	-0.217812	-0.41699	-0.562716	0.130998	-0.204666	0.918652	-0.749014	0.066682	-1.06901	2.12995			-0.248178	-0.115626	-0.93373	-0.07021	-0.110782	-0.493836	0.966854	0.024934	0.01449	-0.168266	0.309022	1.34694	1.31104	0.194908	-0.457856	3.36347	-1.66429
0.322	0.839216	-0.0861	0.436506	-0.368508	-0.026432	0.417956	0.073962	-0.236866	-0.422044	-0.57568	0.13573	-0.198982	0.944958	-0.762538	0.079338	-1.12595	2.05096			-0.257012	-0.079884	-0.942718	-0.049784	-0.105098	-0.464884	0.975954	-0.000938	0.010976	-0.182616	0.30359	1.34039	1.31674	0.196854	-0.461104	3.3923	-1.6595
0.324	0.865998	-0.122584	0.464912	-0.360682	-0.037394	0.449596	0.118076	-0.2485	-0.438088	-0.575512	0.126406	-0.184156	0.952196	-0.772702	0.083482	-1.2077	2.00434			-0.23646	-0.11039	-0.965776	-0.029078	-0.11739	-0.445578	0.973896	0.018718	0.02961	-0.194292	0.299698	1.285	1.34565	0.203826	-0.474908	3.44086	-1.57074
0.326	0.87773	-0.115318	0.502516	-0.367612	-0.053018	0.435442	0.11536	-0.232988	-0.453922	-0.589736	0.120162	-0.149534	0.986692	-0.762104	0.102662	-1.29819	2.01463			-0.18935	-0.124782	-0.972524	-0.03094	-0.089838	-0.46053	0.96565	0.029414	0.017514	-0.20468	0.289478	1.29891	1.35744	0.210756	-0.505106	3.4586	-1.60479
0.328	0.884632	-0.12649	0.539056	-0.365806	-0.073346	0.466564	0.128072	-0.24227	-0.459536	-0.584976	0.11242	-0.157738	1.0246	-0.74655	0.088872	-1.32859	2.00647			-0.206752	-0.126112	-0.981316	-0.05425	-0.083468	-0.441518	0.983066	0.013818	0.025144	-0.208852	0.295582	1.29441	1.37959	0.203266	-0.497518	3.454	-1.64189
0.33	0.864682	-0.097776	0.513982	-0.363552	-0.045654	0.456372	0.123144	-0.253526	-0.439222	-0.58443	0.112476	-0.165088	1.0003	-0.73248	0.089894	-1.31505	2.02433			-0.19166	-0.139748	-0.9709	-0.085302	-0.085876	-0.465682	1.00278	0.001344	0.04298	-0.23618	0.296716	1.35547	1.42657	0.19873	-0.511994	3.44084	-1.66832
0.332	0.857794	-0.107268	0.535668	-0.375312	-0.036792	0.442736	0.136738	-0.26369	-0.451668	-0.584668	0.116354	-0.19096	1.03355	-0.734804	0.088816	-1.31176	2.10484			-0.236418	-0.123158	-0.956872	-0.084658	-0.09653	-0.467964	1.01198	-0.00511	0.048076	-0.234304	0.306376	1.39199	1.41921	0.190554	-0.493234	3.42287	-1.69623
0.334	0.86506	-0.104328	0.556584	-0.376838	-0.035448	0.457562	0.122598	-0.266196	-0.456316	-0.577752	0.128968	-0.195804	0.97594	-0.75936	0.083706	-1.26788	2.1881			-0.265006	-0.127708	-0.954814	-0.063854	-0.113596	-0.48475	1.0502	0.011494	0.061376	-0.227136	0.311556	1.42367	1.39741	0.197918	-0.511224	3.42448	-1.66295
0.336	0.880348	-0.109438	0.529508	-0.37919	-0.055566	0.507682	0.116564	-0.243026	-0.440398	-0.572782	0.137018	-0.221102	1.00016	-0.778722	0.094052	-1.29941	2.25985			-0.248584	-0.119266	-0.949606	-0.057764	-0.108346	-0.514794	1.03606	0.019852	0.057652	-0.223272	0.323204	1.40991	1.39132	0.20195	-0.492814	3.42289	-1.65754
0.338	0.907732	-0.091028	0.523376	-0.382522	-0.063966	0.461692	0.110824	-0.233058	-0.445536	-0.58849	0.130704	-0.237762	0.9653	-0.79688	0.103922	-1.33153	2.22352			-0.24164	-0.093436	-0.983388	-0.073738	-0.101318	-0.554428	1.04044	0.004634	0.038206	-0.19768	0.326172	1.41036	1.3883	0.205898	-0.508508	3.44208	-1.6192
0.34	0.89999	-0.098658	0.48909	-0.40187	-0.05145	0.426132	0.111594	-0.237034	-0.4571	-0.602434	0.137774	-0.243418	0.976052	-0.802018	0.08715	-1.41949	2.19603			-0.243684	-0.092148	-1.00964	-0.08267	-0.110292	-0.541128	1.02301	0.000574	0.025214	-0.204176	0.33369	1.36991	1.37791	0.214886	-0.508242	3.4854	-1.55569
0.342	0.928018	-0.11571	0.498666	-0.395402	-0.028182	0.41251	0.111496	-0.233478	-0.476294	-0.608804	0.13916	-0.224896	0.993804	-0.807884	0.112014	-1.47644	2.10073			-0.228228	-0.053676	-1.01909	-0.066836	-0.09863	-0.500346	1.03452	0.008862	0.039606	-0.209804	0.340634	1.38235	1.41539	0.21329	-0.52675	3.51518	-1.55263
0.344	0.915586	-0.093926	0.529634	-0.386176	-0.05243	0.434812	0.123802	-0.243194	-0.480382	-0.627424	0.144158	-0.213962	1.02514	-0.772534	0.111916	-1.57402	2.20109			-0.200928	-0.087402	-1.01774	-0.058576	-0.085918	-0.510692	1.03769	0.029666	0.031948	-0.241136	0.340564	1.38053	1.45902	0.208726	-0.52626	3.51392	-1.5944
0.346	0.915124	-0.09961	0.535066	-0.37926	-0.048874	0.46662	0.110362	-0.23996	-0.500458	-0.61341	0.142968	-0.213234	1.03313	-0.761432	0.09275	-1.57539	2.20452			-0.22519	-0.10493	-1.01849	-0.05649	-0.101892	-0.474922	1.06435	0.026054	0.038514	-0.221508	0.326858	1.41656	1.4828	0.21217	-0.527114	3.47592	-1.65906
0.348	0.927094	-0.141652	0.562478	-0.380702	-0.052486	0.462518	0.126476	-0.229362	-0.488138	-0.59255	0.128184	-0.221872	1.04524	-0.767998	0.083328	-1.56954	2.24829			-0.18326	-0.14231	-1.03674	-0.068502	-0.090636	-0.495278	1.07216	0.022218	0.057218	-0.240814	0.313166	1.46418	1.48147	0.21231	-0.531776	3.46629	-1.6749
0.35	0.929348	-0.10934	0.577332	-0.39172	-0.041538	0.444192	0.144984	-0.23163	-0.491694	-0.612808	0.128758	-0.217798	1.03755	-0.77966	0.079702	-1.52659	2.32207			-0.211428	-0.136738	-1.01032	-0.09051	-0.098	-0.529312	1.04618	0.031346	0.051478	-0.243922	0.297402	1.47364	1.46821	0.215698	-0.528388	3.45743	-1.68689
0.352	0.922124	-0.124096	0.58947	-0.411432	-0.050988	0.469588	0.164318	-0.25613	-0.49392	-0.604142	0.113274	-0.274162	1.00604	-0.809312	0.104006	-1.48296	2.3837			-0.229488	-0.146594	-1.03204	-0.101234	-0.1204	-0.529816	1.08053	-0.015848	0.046382	-0.224462	0.307594	1.49267	1.48228	0.218064	-0.520912	3.48516	-1.66285
0.354	0.934584	-0.11963	0.61607	-0.413378	-0.060466	0.480186	0.164962	-0.278908	-0.467656	-0.60536	0.126378	-0.249578	0.997052	-0.841316	0.12509	-1.5281	2.3871			-0.22771	-0.124124	-1.01541	-0.087038	-0.114842	-0.523376	1.09736	0.001078	0.047838	-0.20727	0.324982	1.47598	1.46233	0.220598	-0.525462	3.52282	-1.6735
0.356	0.959252	-0.103852	0.60732	-0.417662	-0.062804	0.481726	0.165172	-0.246386	-0.456638	-0.641368	0.13426	-0.265076	1.03975	-0.853706	0.118692	-1.61291	2.35778			-0.228858	-0.124824	-1.01333	-0.079142	-0.120176	-0.56476	1.08723	0.022694	0.029974	-0.198772	0.329168	1.42337	1.46951	0.226184	-0.545846	3.52486	-1.60999
0.358	0.976584	-0.091322	0.584094	-0.409206	-0.045808	0.45262	0.173936	-0.248472	-0.474754	-0.602112	0.14651	-0.230342	1.07201	-0.850654	0.131656	-1.67678	2.29625			-0.233786	-0.084182	-1.02305	-0.079408	-0.101136	-0.568274	1.09455	0.014644	0.024654	-0.19292	0.336252	1.43822	1.46961	0.226884	-0.54159	3.54585	-1.56916
0.36	1.01844	-0.089222	0.56532	-0.417228	-0.02422	0.444682	0.187166	-0.25697	-0.48272	-0.652918	0.149884	-0.227122	1.082	-0.839594	0.129108	-1.77381	2.31003			-0.230328	-0.079982	-1.03774	-0.102298	-0.077742	-0.55881	1.08252	0.011508	0.04634	-0.230188	0.33467	1.44827	1.5331	0.231308	-0.59899	3.56497	-1.61753
0.362	1.00202	-0.093576	0.539378	-0.414526	-0.06055	0.4669	0.181538	-0.259602	-0.510524	-0.646478	0.134834	-0.227738	1.10356	-0.832636	0.108304	-1.83593	2.3204			-0.244342	-0.122052	-1.07171	-0.10136	-0.079758	-0.513618	1.07019	0.01645	0.030142	-0.230328	0.344442	1.47003	1.54861	0.220892	-0.559776	3.55754	-1.64298
0.364	0.969024	-0.118986	0.59451	-0.414974	-0.060592	0.479164	0.197694	-0.26628	-0.535738	-0.644854	0.154672	-0.245518	1.09032	-0.814352	0.126028	-1.8165	2.3694			-0.17864	-0.119938	-1.0858	-0.091854	-0.09135	-0.503972	1.07226	0.018872	0.011704	-0.237678	0.364406	1.49957	1.57896	0.227108	-0.540638	3.51275	-1.67903
0.366	0.99701	-0.12159	0.617232	-0.424536	-0.051002	0.487578	0.186214	-0.279566	-0.51149	-0.648816	0.157038	-0.252434	1.06702	-0.812448	0.109746	-1.78419	2.46365			-0.201754	-0.158956	-1.06418	-0.06496	-0.109578	-0.497672	1.08699	0.02016	0.02513	-0.22694	0.358526	1.55807	1.55624	0.212632	-0.546938	3.48193	-1.64499
0.368	1.011	-0.142912	0.6447	-0.418684	-0.054152	0.468622	0.189182	-0.270466	-0.515424	-0.671594	0.154602	-0.25473	1.01455	-0.82873	0.136556	-1.76679	2.51898			-0.189784	-0.137928	-1.0523	-0.05999	-0.132846	-0.542682	1.08371	0.010094	0.059234	-0.20265	0.356608	1.54771	1.5548	0.226114	-0.557802	3.49538	-1.63542
0.37	1.00433	-0.136528	0.670096	-0.422884	-0.068698	0.47754	0.187404	-0.253246	-0.501816	-0.653464	0.141792	-0.289044	1.08119	-0.84959	0.107338	-1.75102	2.4738			-0.214746	-0.135184	-1.07481	-0.082236	-0.100828	-0.57687	1.07356	0.019334	0.058002	-0.238098	0.335524	1.52716	1.52832	0.233464	-0.554848	3.54526	-1.62142
0.372	1.00708	-0.130382	0.637378	-0.429338	-0.061852	0.459802	0.213962	-0.251538	-0.50785	-0.678412	0.145348	-0.295806	1.08948	-0.87416	0.126336	-1.77968	2.39761			-0.233086	-0.132958	-1.07713	-0.094738	-0.118608	-0.576366	1.11163	-0.00854	0.063854	-0.220696	0.327376	1.50102	1.52558	0.236824	-0.560336	3.53293	-1.5492
0.374	1.01559	-0.11816	0.625254	-0.423976	-0.067116	0.4753	0.242802	-0.29918	-0.482454	-0.673274	0.13685	-0.26019	1.09131	-0.889028	0.135884	-1.88075	2.39483			-0.242368	-0.139132	-1.06581	-0.103852	-0.116732	-0.593642	1.12333	-0.002086	0.072968	-0.18165	0.333578	1.51081	1.5461	0.240632	-0.576758	3.53408	-1.5569
0.376	1.02701	-0.107604	0.63665	-0.418404	-0.0462	0.473872	0.25529	-0.303282	-0.501788	-0.69608	0.13587	-0.254968	1.11476	-0.891408	0.146636	-1.98981	2.43907			-0.229922	-0.11151	-1.06947	-0.101626	-0.09135	-0.596442	1.13219	-0.000756	0.047544	-0.196938	0.351778	1.49359	1.58295	0.252028	-0.576912	3.51793	-1.62791
0.378	1.04047	-0.116592	0.64498	-0.4277	-0.071512	0.485562	0.242956	-0.261716	-0.504056	-0.683886	0.146342	-0.258482	1.13663	-0.880194	0.128772	-2.04478	2.46049			-0.199164	-0.128408	-1.06358	-0.106736	-0.08841	-0.57414	1.1366	0.008302	0.03437	-0.226548	0.349426	1.53608	1.627	0.24612	-0.584094	3.51908	-1.62799
0.38	1.07271	-0.106904	0.628726	-0.436982	-0.05971	0.497532	0.230608	-0.263844	-0.518616	-0.68208	0.1505	-0.260848	1.12412	-0.863422	0.092092	-2.07092	2.5192			-0.204806	-0.147168	-1.07321	-0.113204	-0.108626	-0.571788	1.14342	0.01379	0.023758	-0.227836	0.351078	1.56023	1.64529	0.251328	-0.558544	3.50762	-1.6277
0.382	1.07822	-0.105686	0.657636	-0.442568	-0.050484	0.51394	0.206052	-0.275058	-0.523012	-0.685314	0.158788	-0.284662	1.13184	-0.8561	0.13587	-2.04508	2.58259			-0.21399	-0.129318	-1.08886	-0.107548	-0.095816	-0.53137	1.17274	0.013902	0.033054	-0.25928	0.354914	1.61134	1.64748	0.24094	-0.583646	3.45379	-1.642
0.384	1.06149	-0.09926	0.690382	-0.448518	-0.054446	0.496664	0.212086	-0.279846	-0.547288	-0.678286	0.162974	-0.290654	1.09259	-0.850864	0.12558	-2.02458	2.64593			-0.197148	-0.13965	-1.08578	-0.088774	-0.103432	-0.528528	1.15402	0.00112	0.0574	-0.267596	0.366926	1.62665	1.64088	0.241374	-0.575232	3.43868	-1.61442
0.386	1.04717	-0.122836	0.718774	-0.444598	-0.078498	0.49427	0.196812	-0.269108	-0.531552	-0.681492	0.172004	-0.311738	1.09663	-0.889364	0.162666	-2.02098	2.59118			-0.188104	-0.16765	-1.07857	-0.067984	-0.112014	-0.5754	1.16956	-0.006062	0.061796	-0.2485	0.379176	1.62947	1.61519	0.246652	-0.602812	3.47403	-1.59296
0.388	1.0739	-0.138964	0.728924	-0.443198	-0.068684	0.468132	0.232582	-0.264852	-0.550424	-0.670502	0.17402	-0.319452	1.10709	-0.907494	0.13188	-2.0102	2.57789			-0.184142	-0.138698	-1.07778	-0.083972	-0.141526	-0.585732	1.14215	0.009646	0.057904	-0.25319	0.37562	1.61911	1.62512	0.256424	-0.602644	3.48312	-1.53348
0.39	1.07351	-0.144508	0.707756	-0.433048	-0.061306	0.492156	0.257698	-0.278838	-0.529788	-0.685496	0.17031	-0.336448	1.10617	-0.928144	0.135982	-2.07068	2.52689			-0.190568	-0.12621	-1.06483	-0.105602	-0.112994	-0.603708	1.134	0.019992	0.079688	-0.249144	0.367234	1.60513	1.61158	0.254772	-0.605654	3.49	-1.54619
0.392	1.0894	-0.122934	0.695478	-0.448658	-0.071442	0.539266	0.259798	-0.270998	-0.502432	-0.703122	0.167608	-0.291886	1.14695	-0.9289	0.145264	-2.14985	2.52371			-0.21728	-0.166376	-1.07972	-0.115822	-0.115248	-0.580552	1.15297	-0.002702	0.053998	-0.241906	0.350602	1.59494	1.63481	0.258454	-0.603498	3.50848	-1.60598
0.394	1.09126	-0.121982	0.677362	-0.45976	-0.061768	0.540092	0.276066	-0.291494	-0.49665	-0.716086	0.166502	-0.29057	1.16606	-0.927486	0.129906	-2.25581	2.52748			-0.243992	-0.186382	-1.0905	-0.112826	-0.074116	-0.536018	1.17946	-0.015554	0.087654	-0.27167	0.357042	1.61766	1.70199	0.269766	-0.583002	3.46665	-1.64338
0.396	1.10082	-0.104244	0.67165	-0.456596	-0.050764	0.549542	0.29974	-0.306194	-0.525602	-0.710668	0.17241	-0.293076	1.16393	-0.913276	0.12887	-2.2611	2.59329			-0.250194	-0.17612	-1.09448	-0.108234	-0.101962	-0.53305	1.1755	-0.015806	0.071246	-0.233604	0.351036	1.66977	1.73895	0.261884	-0.59255	3.43018	-1.62893
0.398	1.13572	-0.109424	0.692076	-0.456204	-0.051142	0.544544	0.294182	-0.288596	-0.523152	-0.741286	0.161938	-0.33215	1.16691	-0.893298	0.142086	-2.27234	2.70549			-0.247968	-0.172872	-1.11198	-0.109816	-0.128912	-0.54656	1.20105	0.00413	0.070084	-0.25123	0.366114	1.68764	1.71454	0.263396	-0.579964	3.39914	-1.58033
0.4	1.15199	-0.10129	0.709506	-0.467306	-0.047068	0.545986	0.232736	-0.280588	-0.538482	-0.70483	0.15848	-0.343098	1.11061	-0.897932	0.151718	-2.23577	2.74805			-0.251328	-0.165074	-1.10925	-0.115038	-0.150836	-0.583268	1.23406	0.020846	0.068096	-0.262542	0.357182	1.71377	1.70197	0.250796	-0.57309	3.41725	-1.60355
0.402	1.1653	-0.113288	0.72716	-0.45864	-0.051408	0.519512	0.211862	-0.29491	-0.560966	-0.744338	0.161308	-0.3409	1.08798	-0.902356	0.145306	-2.23555	2.75519			-0.243348	-0.150542	-1.16676	-0.119392	-0.123816	-0.592508	1.21246	0.010752	0.060396	-0.302596	0.358946	1.71055	1.7194	0.261156	-0.59108	3.41823	-1.58942
0.404	1.11615	-0.114408	0.73157	-0.457492	-0.055832	0.499128	0.219436	-0.308714	-0.54817	-0.698026	0.175014	-0.342594	1.11336	-0.925582	0.161084	-2.24092	2.72327			-0.183274	-0.132132	-1.14145	-0.11921	-0.120974	-0.572166	1.21209	-0.006664	0.055174	-0.272356	0.3703	1.70708	1.72753	0.260582	-0.611072	3.45285	-1.57093
0.406	1.11649	-0.113596	0.753634	-0.463064	-0.067508	0.510888	0.228872	-0.290864	-0.566832	-0.69734	0.188286	-0.342874	1.15445	-0.953722	0.157192	-2.2882	2.65948			-0.185416	-0.156492	-1.15319	-0.093744	-0.133434	-0.583674	1.22854	0.009058	0.070546	-0.263704	0.387492	1.67985	1.68813	0.266882	-0.612052	3.44848	-1.50527
0.408	1.10355	-0.12642	0.758856	-0.460222	-0.064666	0.504672	0.28826	-0.300664	-0.530628	-0.709604	0.186242	-0.327474	1.18625	-0.962234	0.156352	-2.38664	2.63743			-0.193102	-0.139692	-1.14092	-0.090062	-0.134498	-0.618646	1.21993	-0.00392	0.06475	-0.254296	0.386526	1.65652	1.68602	0.277942	-0.599886	3.46742	-1.55495
0.41	1.13144	-0.136094	0.741818	-0.470008	-0.05838	0.524048	0.290192	-0.29456	-0.545118	-0.725928	0.191842	-0.319914	1.21428	-0.960078	0.132314	-2.4283	2.6578			-0.223048	-0.16037	-1.1452	-0.102172	-0.1393	-0.599102	1.1964	-0.003416	0.071106	-0.2555	0.38486	1.6749	1.74485	0.2828	-0.625758	3.4574	-1.60772
0.412	1.12945	-0.118818	0.744464	-0.46893	-0.040922	0.503076	0.323876	-0.275212	-0.554666	-0.707504	0.191996	-0.347648	1.22679	-0.963256	0.10206	-2.49361	2.71254			-0.251454	-0.155162	-1.13918	-0.11431	-0.119392	-0.620396	1.20179	0.01239	0.05908	-0.264572	0.385868	1.74457	1.77988	0.274358	-0.60508	3.42581	-1.5933
0.414	1.13019	-0.10955	0.71071	-0.470134	-0.058016	0.521192	0.324156	-0.30625	-0.552552	-0.71813	0.191842	-0.346318	1.22325	-0.945924	0.139888	-2.48468	2.75681			-0.271684	-0.162386	-1.15752	-0.119224	-0.123466	-0.627074	1.21705	-0.024724	0.045682	-0.2688	0.382144	1.76709	1.77925	0.278558	-0.615748	3.42135	-1.6057
0.416	1.15018	-0.123186	0.720664	-0.473256	-0.059556	0.51177	0.328944	-0.325444	-0.574308	-0.745458	0.188748	-0.34923	1.18105	-0.939428	0.147238	-2.45643	2.85411			-0.28322	-0.12425	-1.13499	-0.124334	-0.136584	-0.644658	1.22865	-0.001246	0.040894	-0.263928	0.378882	1.7985	1.77241	0.272594	-0.625002	3.37291	-1.59816
0.418	1.17046	-0.093576	0.740404	-0.470148	-0.058702	0.51625	0.353262	-0.306628	-0.582582	-0.73584	0.189994	-0.351722	1.15478	-0.931504	0.14952	-2.42435	2.91319			-0.266014	-0.130564	-1.1506	-0.128618	-0.144088	-0.6524	1.22045	0.011914	0.073864	-0.274442	0.36953	1.79294	1.77799	0.265048	-0.629692	3.42537	-1.56457
0.42	1.18782	-0.110726	0.76468	-0.474516	-0.060634	0.494116	0.320362	-0.30506	-0.590422	-0.722512	0.172816	-0.362264	1.19882	-0.95207	0.148064	-2.4309	2.88287			-0.261772	-0.12404	-1.17249	-0.12138	-0.146748	-0.654472	1.27002	-0.000308	0.066234	-0.29099	0.36239	1.74285	1.7513	0.274918	-0.643552	3.44788	-1.60485
0.422	1.19006	-0.119532	0.774074	-0.48671	-0.0644	0.452242	0.277102	-0.30394	-0.604492	-0.737534	0.165732	-0.384832	1.2136	-0.98343	0.163968	-2.5037	2.818			-0.2394	-0.102662	-1.17041	-0.123424	-0.130956	-0.658952	1.28346	-0.008932	0.081214	-0.286552	0.362376	1.7334	1.75374	0.280014	-0.630994	3.43389	-1.57041
0.424	1.158	-0.121366	0.80913	-0.479472	-0.080122	0.480172	0.259854	-0.29414	-0.588672	-0.74067	0.172396	-0.3654	1.23836	-1.00409	0.16058	-2.59441	2.7971			-0.202818	-0.137788	-1.17993	-0.112966	-0.128128	-0.63952	1.30217	0.011914	0.092442	-0.296688	0.38276	1.72775	1.78826	0.281344	-0.645064	3.38682	-1.57168
0.426	1.17662	-0.1183	0.81438	-0.481754	-0.067242	0.490924	0.268058	-0.315308	-0.56679	-0.74781	0.181734	-0.343714	1.2641	-1.01322	0.153244	-2.65761	2.81526			-0.204176	-0.151396	-1.17719	-0.090524	-0.14056	-0.633612	1.28939	-0.000462	0.087598	-0.295932	0.39046	1.72782	1.81159	0.288932	-0.643958	3.38542	-1.62254
0.428	1.1865	-0.12796	0.848568	-0.476098	-0.068768	0.515382	0.271488	-0.309204	-0.579936	-0.74606	0.184576	-0.356916	1.29073	-1.00257	0.166012	-2.70732	2.84196			-0.181594	-0.155204	-1.15696	-0.104104	-0.144914	-0.608384	1.28716	0.008652	0.08498	-0.285418	0.39557	1.75388	1.82297	0.296786	-0.643286	3.33607	-1.61357
0.43	1.1905	-0.137018	0.829752	-0.47243	-0.062062	0.51219	0.31941	-0.307076	-0.54726	-0.75614	0.199864	-0.366492	1.24341	-0.987308	0.121198	-2.66018	2.88746			-0.232344	-0.14777	-1.157	-0.130536	-0.15365	-0.63434	1.26608	0.003276	0.065058	-0.273546	0.388584	1.80237	1.84115	0.300692	-0.645498	3.33249	-1.60629
0.432	1.19638	-0.132188	0.832776	-0.490798	-0.06888	0.525952	0.3626	-0.30555	-0.574084	-0.749504	0.202874	-0.410662	1.23732	-0.981372	0.146454	-2.6739	2.96824			-0.254702	-0.142842	-1.15671	-0.143584	-0.122038	-0.653548	1.26325	0.007042	0.07448	-0.254058	0.393078	1.83631	1.83924	0.285782	-0.65184	3.29472	-1.59678
0.434	1.21544	-0.138166	0.800156	-0.498442	-0.065786	0.531678	0.372176	-0.309176	-0.597436	-0.770868	0.204106	-0.415268	1.21895	-0.982898	0.156968	-2.637	3.02487			-0.23891	-0.160888	-1.18595	-0.146902	-0.131936	-0.694904	1.26813	-0.009324	0.057848	-0.299334	0.400316	1.84589	1.84405	0.281876	-0.630616	3.3244	-1.58281
0.436	1.23474	-0.136374	0.774172	-0.505456	-0.07301	0.556598	0.389732	-0.320124	-0.58499	-0.784644	0.206976	-0.424676	1.24594	-0.996604	0.173012	-2.63134	3.00756			-0.272594	-0.164724	-1.19486	-0.138054	-0.145586	-0.684376	1.29451	-0.01743	0.056378	-0.293202	0.402276	1.81509	1.85021	0.287966	-0.62398	3.37523	-1.57083
0.438	1.23823	-0.107156	0.799918	-0.500136	-0.075894	0.536914	0.391678	-0.324548	-0.605682	-0.789152	0.216846	-0.429982	1.26941	-1.01804	0.181258	-2.69206	3.01524			-0.269668	-0.13531	-1.19417	-0.122682	-0.147672	-0.689486	1.27848	0.018186	0.05159	-0.28847	0.399266	1.8131	1.8374	0.299922	-0.646114	3.35462	-1.56605
0.44	1.24585	-0.101724	0.839552	-0.506072	-0.078764	0.514472	0.370006	-0.323624	-0.63581	-0.786506	0.209174	-0.397446	1.27795	-1.032	0.184996	-2.77262	2.92977			-0.263858	-0.151032	-1.21052	-0.136178	-0.156534	-0.715974	1.30267	0.008736	0.078694	-0.29288	0.39284	1.80541	1.84397	0.301154	-0.677068	3.33418	-1.52489
0.442	1.23687	-0.120512	0.865102	-0.509936	-0.08218	0.518224	0.330652	-0.310618	-0.632114	-0.787024	0.19537	-0.395486	1.30761	-1.04451	0.1547	-2.82304	2.95149			-0.236824	-0.145824	-1.22377	-0.139118	-0.150598	-0.703542	1.31067	-0.01169	0.078862	-0.303618	0.373534	1.78581	1.87926	0.29736	-0.65723	3.30877	-1.53819
0.444	1.22674	-0.137704	0.848246	-0.510902	-0.084294	0.516922	0.317828	-0.305844	-0.584318	-0.789712	0.20447	-0.405748	1.30978	-1.04756	0.15792	-2.89598	2.97934			-0.205772	-0.148274	-1.21149	-0.1435	-0.159936	-0.694988	1.36223	0.014098	0.080878	-0.279734	0.375998	1.83081	1.92779	0.29785	-0.671132	3.27055	-1.58277
0.446	1.22191	-0.12691	0.8932	-0.498358	-0.076748	0.524944	0.31731	-0.329588	-0.586712	-0.781718	0.196112	-0.432222	1.28778	-1.03533	0.1309	-2.88508	2.99944			-0.20727	-0.161602	-1.20315	-0.128016	-0.15897	-0.668556	1.34221	-0.015568	0.086632	-0.301672	0.393148	1.85276	1.9105	0.299432	-0.666722	3.24492	-1.57126
0.448	1.22773	-0.135058	0.875434	-0.511224	-0.072212	0.541842	0.313362	-0.327012	-0.574826	-0.778806	0.189896	-0.43722	1.20453	-1.02194	0.149226	-2.85883	3.05369			-0.21707	-0.165004	-1.20022	-0.10815	-0.114604	-0.679252	1.32654	0.008498	0.086758	-0.28616	0.397376	1.89414	1.91993	0.310702	-0.685916	3.19879	-1.58497
0.45	1.21993	-0.140896	0.881888	-0.51016	-0.07938	0.532602	0.361914	-0.332374	-0.574938	-0.782992	0.198772	-0.450422	1.24123	-1.01266	0.160552	-2.84777	3.12789			-0.247338	-0.176386	-1.18608	-0.11942	-0.152544	-0.690844	1.32626	0.012194	0.084476	-0.27678	0.401492	1.92598	1.90575	0.301756	-0.68852	3.20064	-1.55554
0.452	1.25173	-0.14406	0.87276	-0.524832	-0.072534	0.545804	0.354102	-0.325486	-0.614432	-0.780836	0.202314	-0.494676	1.29268	-1.0263	0.155148	-2.86153	3.171			-0.236866	-0.159082	-1.20963	-0.138096	-0.162456	-0.689486	1.32618	0.019362	0.07819	-0.28133	0.395528	1.91701	1.87747	0.299922	-0.68005	3.22882	-1.55802
0.454	1.26746	-0.141148	0.835198	-0.540764	-0.070434	0.546238	0.355012	-0.329056	-0.624974	-0.80073	0.210182	-0.51065	1.29273	-1.04381	0.165774	-2.8863	3.14184			-0.218232	-0.201684	-1.21409	-0.149282	-0.166208	-0.74767	1.33811	-0.022134	0.06244	-0.283108	0.405412	1.88993	1.90599	0.301784	-0.657566	3.26659	-1.51943
0.456	1.26875	-0.13426	0.858074	-0.53599	-0.05936	0.53893	0.347018	-0.35588	-0.652778	-0.820848	0.221508	-0.513128	1.34376	-1.06691	0.159236	-2.91974	3.07917			-0.230524	-0.153188	-1.24615	-0.159894	-0.15351	-0.737324	1.37196	-0.009002	0.087598	-0.288666	0.416724	1.8544	1.9427	0.306614	-0.687274	3.23753	-1.49992
0.458	1.28719	-0.134456	0.88683	-0.524062	-0.062902	0.547554	0.351176	-0.350294	-0.635502	-0.793548	0.22659	-0.46319	1.3715	-1.0904	0.145712	-3.01368	3.04294			-0.238546	-0.136724	-1.24726	-0.152768	-0.174384	-0.731752	1.39994	-0.008932	0.091826	-0.30772	0.418376	1.8858	1.99156	0.308602	-0.696668	3.2093	-1.49514
0.46	1.27779	-0.130046	0.90573	-0.527184	-0.07224	0.524944	0.3626	-0.313026	-0.620564	-0.795046	0.232134	-0.450534	1.34215	-1.09043	0.1421	-3.04807	3.03506			-0.20062	-0.120008	-1.24032	-0.147238	-0.17227	-0.752458	1.40371	0.002632	0.10542	-0.29631	0.418012	1.86985	1.99931	0.314762	-0.690116	3.18186	-1.53926
0.462	1.2816	-0.12593	0.899374	-0.529424	-0.067508	0.558866	0.355768	-0.316568	-0.625072	-0.818902	0.219506	-0.449904	1.30889	-1.07526	0.152362	-3.07814	3.09021			-0.173922	-0.15218	-1.23064	-0.152782	-0.166012	-0.705138	1.39041	0.003766	0.069062	-0.32305	0.414008	1.89958	1.99556	0.31794	-0.704018	3.15238	-1.56983
0.464	1.28271	-0.132118	0.936068	-0.534338	-0.061068	0.553084	0.389662	-0.333088	-0.608426	-0.786814	0.211162	-0.501956	1.25859	-1.05728	0.127106	-3.06228	3.15085			-0.181888	-0.15771	-1.21832	-0.14847	-0.13083	-0.7231	1.38016	0.000308	0.107688	-0.321188	0.399504	1.93991	2.01474	0.308182	-0.692594	3.15094	-1.53637
0.466	1.28261	-0.125608	0.928578	-0.536984	-0.061782	0.593698	0.399294	-0.345086	-0.59451	-0.794892	0.214928	-0.539868	1.2903	-1.04621	0.123592	-3.03842	3.17841			-0.200942	-0.188846	-1.21155	-0.137536	-0.122934	-0.701848	1.39318	0.023842	0.097748	-0.31647	0.402304	1.98948	1.99382	0.307678	-0.729974	3.13774	-1.51894
0.468	1.28621	-0.134358	0.931826	-0.53816	-0.074214	0.589302	0.392294	-0.342356	-0.609812	-0.790552	0.202216	-0.554792	1.32044	-1.04887	0.146664	-3.02438	3.27779			-0.24297	-0.167846	-1.20534	-0.130004	-0.140686	-0.71085	1.41355	0.00385	0.0924	-0.292726	0.412062	1.97903	1.97484	0.308952	-0.700798	3.16435	-1.51238
0.47	1.2924	-0.154854	0.931602	-0.529872	-0.083636	0.567924	0.365666	-0.353752	-0.597072	-0.803992	0.2002	-0.520492	1.32826	-1.07324	0.156282	-3.085	3.2985			-0.251104	-0.159572	-1.21001	-0.119476	-0.157752	-0.72898	1.4223	-0.022064	0.07938	-0.297682	0.415856	1.95762	2.00371	0.318388	-0.698866	3.14331	-1.46434
0.472	1.31505	-0.158242	0.912282	-0.533764	-0.06335	0.58541	0.35693	-0.313516	-0.63553	-0.812854	0.203168	-0.535206	1.34394	-1.09789	0.152096	-3.06695	3.25427			-0.263984	-0.173082	-1.24583	-0.141778	-0.158578	-0.752346	1.43422	0.008904	0.109298	-0.31388	0.411516	1.94746	2.00635	0.320278	-0.707882	3.13825	-1.45372
0.474	1.35012	-0.145152	0.910784	-0.540722	-0.08288	0.586964	0.3136	-0.358708	-0.654766	-0.824124	0.203686	-0.514752	1.35632	-1.12728	0.15918	-3.15182	3.15822			-0.25459	-0.18844	-1.25866	-0.153818	-0.17486	-0.753186	1.4387	-0.037128	0.0889	-0.287798	0.420462	1.93977	2.06081	0.326032	-0.70854	3.10177	-1.43991
0.476	1.34427	-0.117264	0.937496	-0.550032	-0.064974	0.584724	0.300622	-0.37422	-0.669312	-0.825496	0.217714	-0.472556	1.38487	-1.13501	0.148204	-3.2275	3.16593			-0.270494	-0.17633	-1.25665	-0.158536	-0.163576	-0.77231	1.45594	-0.027972	0.068544	-0.32585	0.436828	1.94606	2.08694	0.322112	-0.709674	3.07059	-1.47015
0.478	1.32602	-0.116648	0.968422	-0.550256	-0.073654	0.60067	0.30247	-0.356454	-0.66171	-0.818398	0.223804	-0.498624	1.34603	-1.12312	0.154042	-3.26857	3.17667			-0.283346	-0.188594	-1.27609	-0.154784	-0.174202	-0.786982	1.46594	-0.013202	0.074172	-0.328202	0.444962	1.99672	2.06791	0.328622	-0.719334	3.04912	-1.51624
0.48	1.31988	-0.107338	0.93058	-0.554624	-0.091028	0.59269	0.309498	-0.365904	-0.669424	-0.831292	0.225484	-0.500808	1.29835	-1.11185	0.152306	-3.2412	3.21265			-0.23114	-0.200088	-1.29486	-0.153566	-0.161966	-0.780066	1.45821	-0.016758	0.104944	-0.346388	0.450366	2.01872	2.0539	0.328384	-0.723506	3.03346	-1.51134
0.482	1.33137	-0.135408	0.958706	-0.559804	-0.067844	0.59619	0.345478	-0.367136	-0.641578	-0.833392	0.23002	-0.521808	1.29878	-1.08179	0.164206	-3.24593	3.26617			-0.217756	-0.196882	-1.26182	-0.146314	-0.166838	-0.752066	1.45292	0.007868	0.11921	-0.330414	0.44359	2.03766	2.04116	0.33376	-0.738276	3.02117	-1.47021
0.484	1.31702	-0.159292	0.985894	-0.567602	-0.072324	0.61747	0.401646	-0.341782	-0.64932	-0.855862	0.227458	-0.529018	1.32885	-1.08517	0.163282	-3.22188	3.36475			-0.201418	-0.152054	-1.25117	-0.14525	-0.116844	-0.714266	1.46331	0.01624	0.122206	-0.324688	0.43421	2.05775	2.04718	0.3192	-0.732788	3.04601	-1.46157
0.486	1.33234	-0.143108	0.966364	-0.550704	-0.076174	0.630112	0.413714	-0.36876	-0.64057	-0.831474	0.215194	-0.542486	1.36707	-1.08849	0.16324	-3.20873	3.38341			-0.248276	-0.149688	-1.24712	-0.146034	-0.138166	-0.731458	1.437	0.000756	0.099036	-0.31094	0.437332	2.04828	2.05323	0.317506	-0.724136	3.05284	-1.44875
0.488	1.3407	-0.144326	0.98119	-0.544432	-0.071302	0.609966	0.400022	-0.376054	-0.653842	-0.857136	0.22141	-0.558684	1.37694	-1.1129	0.168476	-3.25039	3.38689			-0.283892	-0.180292	-1.23509	-0.145082	-0.147728	-0.747656	1.46863	-0.018578	0.100156	-0.306194	0.435274	2.03701	2.10724	0.324044	-0.746298	3.03302	-1.45492
0.49	1.34351	-0.152208	0.965398	-0.541506	-0.05747	0.58884	0.351666	-0.36358	-0.686798	-0.857444	0.220556	-0.556262	1.41508	-1.14342	0.177156	-3.31349	3.30943			-0.307986	-0.178192	-1.24271	-0.140868	-0.161952	-0.78197	1.49979	-0.025256	0.094038	-0.311766	0.435092	2.03582	2.11651	0.328594	-0.741804	2.99799	-1.40155
0.492	1.35521	-0.14763	0.957964	-0.552902	-0.068194	0.604856	0.29834	-0.34244	-0.674576	-0.845026	0.210392	-0.512176	1.39959	-1.15555	0.173698	-3.35525	3.29238			-0.282394	-0.193676	-1.29812	-0.131054	-0.161924	-0.793058	1.52239	-0.0091	0.085358	-0.323694	0.429268	2.02248	2.10508	0.334698	-0.750134	2.95903	-1.37722
0.494	1.38545	-0.142884	0.966196	-0.560364	-0.093184	0.609476	0.268996	-0.366394	-0.697102	-0.875714	0.20797	-0.528374	1.39411	-1.16238	0.155652	-3.43903	3.29344			-0.278978	-0.19341	-1.29307	-0.1449	-0.167062	-0.793198	1.51973	-0.026026	0.097216	-0.342076	0.432978	2.03298	2.12951	0.34223	-0.743974	2.90945	-1.44976
0.496	1.39944	-0.135478	0.992894	-0.560714	-0.061698	0.595364	0.280574	-0.387058	-0.682612	-0.884002	0.221886	-0.54516	1.3606	-1.15647	0.145432	-3.48061	3.28843			-0.282436	-0.19453	-1.31114	-0.158032	-0.163562	-0.817222	1.50499	-0.018424	0.133518	-0.340564	0.44002	2.06468	2.10921	0.3416	-0.756126	2.87428	-1.46101
0.498	1.3853	-0.124026	0.984214	-0.575288	-0.080178	0.595882	0.354662	-0.379288	-0.698922	-0.862666	0.233632	-0.548632	1.36198	-1.14827	0.159726	-3.46815	3.33148			-0.28644	-0.170842	-1.32873	-0.157262	-0.124194	-0.799694	1.49327	-0.01351	0.120708	-0.322658	0.448672	2.11834	2.12474	0.347942	-0.7679	2.87328	-1.44616
0.5	1.36591	-0.120778	0.99512	-0.563402	-0.08785	0.602028	0.409794	-0.36722	-0.690606	-0.892192	0.238462	-0.586012	1.39457	-1.12304	0.126938	-3.42248	3.38922			-0.2555	-0.168574	-1.31254	-0.160734	-0.144172	-0.791616	1.48315	-0.003178	0.140924	-0.328846	0.458822	2.14623	2.11418	0.340676	-0.739018	2.89566	-1.4474
0.502	1.37934	-0.157822	1.02332	-0.557914	-0.08407	0.634732	0.455154	-0.35427	-0.655144	-0.865872	0.235326	-0.587454	1.38428	-1.12295	0.142072	-3.40795	3.48618			-0.245812	-0.178262	-1.31319	-0.165284	-0.170548	-0.772856	1.46713	0.005138	0.146356	-0.34594	0.464758	2.12633	2.12506	0.331226	-0.757764	2.92306	-1.40748
0.504	1.3833	-0.16205	1.01821	-0.55909	-0.122444	0.663656	0.50211	-0.362264	-0.671874	-0.88557	0.2366	-0.60641	1.39887	-1.13103	0.166012	-3.46597	3.49783			-0.22589	-0.18872	-1.3109	-0.168112	-0.142506	-0.740236	1.45744	-0.010906	0.118412	-0.32389	0.457212	2.11764	2.14778	0.333102	-0.756952	2.82573	-1.34051
0.506	1.4124	-0.16198	1.02935	-0.570668	-0.092792	0.636958	0.46396	-0.370034	-0.680694	-0.887292	0.233926	-0.5971	1.42149	-1.1662	0.181916	-3.46991	3.46276			-0.26964	-0.203266	-1.32979	-0.169092	-0.13447	-0.778442	1.46726	-0.000182	0.109284	-0.31178	0.45283	2.09119	2.18739	0.34293	-0.755062	2.80573	-1.38984
0.508	1.37487	-0.145138	1.01289	-0.58492	-0.087374	0.615944	0.435484	-0.375284	-0.682808	-0.896098	0.238686	-0.575862	1.44749	-1.1936	0.177604	-3.48687	3.38381			-0.283976	-0.198912	-1.29856	-0.161756	-0.147224	-0.807422	1.51241	-0.008428	0.115388	-0.352688	0.450184	2.10932	2.23849	0.340522	-0.7756	2.76349	-1.32308
0.51	1.40314	-0.140252	0.986958	-0.57078	-0.07798	0.607894	0.391468	-0.382816	-0.664958	-0.909104	0.236796	-0.572852	1.42244	-1.19872	0.179018	-3.51086	3.36332			-0.29246	-0.172438	-1.32283	-0.140602	-0.167636	-0.833378	1.52814	-0.010234	0.131964	-0.336168	0.449568	2.13056	2.20255	0.345296	-0.77371	2.74347	-1.32924
0.512	1.41162	-0.139076	0.995652	-0.574812	-0.079716	0.651742	0.341712	-0.375942	-0.690592	-0.912786	0.234318	-0.587006	1.36804	-1.20424	0.149114	-3.62974	3.41391			-0.286384	-0.1708	-1.32135	-0.123494	-0.173306	-0.817754	1.57119	-0.003206	0.138152	-0.355026	0.446572	2.14763	2.19307	0.363454	-0.786352	2.68261	-1.368
0.514	1.42919	-0.14581	1.01191	-0.580174	-0.0749	0.65905	0.349202	-0.402122	-0.700658	-0.904372	0.227164	-0.610414	1.38831	-1.17982	0.162736	-3.64288	3.43006			-0.292978	-0.190512	-1.3494	-0.148134	-0.160328	-0.783342	1.55744	-0.032396	0.127974	-0.348726	0.447832	2.19316	2.19513	0.35343	-0.783566	2.69685	-1.39178
0.516	1.43695	-0.141316	1.02453	-0.582316	-0.083552	0.68033	0.355656	-0.39186	-0.759458	-0.904078	0.223594	-0.63756	1.41442	-1.16757	0.158998	-3.62951	3.48116			-0.305942	-0.184156	-1.36482	-0.162358	-0.142142	-0.801066	1.54398	-0.024514	0.152152	-0.355936	0.455546	2.20982	2.19776	0.347382	-0.811272	2.72733	-1.38851
0.518	1.43658	-0.161518	1.05626	-0.57302	-0.078638	0.66997	0.401352	-0.404376	-0.753536	-0.920346	0.240912	-0.656614	1.41758	-1.16697	0.17101	-3.60006	3.54392			-0.269024	-0.157822	-1.37295	-0.173432	-0.135968	-0.802634	1.49421	-0.0343	0.08344	-0.381444	0.456064	2.17953	2.21376	0.34335	-0.795088	2.77504	-1.34411
0.52	1.42006	-0.141694	1.04398	-0.585074	-0.09191	0.68159	0.434392	-0.404166	-0.729106	-0.887124	0.256956	-0.636538	1.44521	-1.17979	0.166026	-3.67574	3.61865			-0.258776	-0.123074	-1.37529	-0.163506	-0.161308	-0.802354	1.4929	-0.007966	0.08855	-0.384538	0.470414	2.18365	2.25512	0.345632	-0.770546	2.73812	-1.32135
0.522	1.43976	-0.16877	1.0549	-0.582582	-0.130004	0.668766	0.445578	-0.382984	-0.724514	-0.899878	0.25193	-0.63623	1.4401	-1.19724	0.174398	-3.56805	3.60872			-0.253358	-0.16212	-1.35122	-0.154546	-0.15302	-0.795942	1.51127	-0.003836	0.092792	-0.363636	0.472696	2.16398	2.29673	0.353052	-0.782376	2.72072	-1.28758
0.524	1.43713	-0.153454	1.05864	-0.588644	-0.118202	0.639492	0.431984	-0.371924	-0.747292	-0.898814	0.257558	-0.59346	1.45188	-1.22205	0.1589	-3.59358	3.57715			-0.248948	-0.157402	-1.34604	-0.16506	-0.163338	-0.8169	1.51992	-0.024388	0.117698	-0.353654	0.472752	2.17048	2.31525	0.365638	-0.824922	2.66514	-1.28381
0.526	1.44852	-0.161014	1.05617	-0.604562	-0.077728	0.670908	0.426972	-0.382746	-0.720776	-0.900704	0.2513	-0.607838	1.42626	-1.24452	0.16296	-3.61134	3.52164			-0.292558	-0.172452	-1.35703	-0.17038	-0.156282	-0.844494	1.53409	-0.019026	0.142324	-0.35679	0.472962	2.17207	2.28995	0.359324	-0.797986	2.62515	-1.26679
0.528	1.44785	-0.160244	1.06418	-0.590506	-0.077126	0.643356	0.43708	-0.395584	-0.736246	-0.910364	0.255864	-0.636734	1.39314	-1.24235	0.150906	-3.68178	3.49101			-0.28791	-0.189224	-1.35248	-0.165242	-0.166278	-0.842002	1.56269	-0.022148	0.141274	-0.37009	0.470358	2.20532	2.27555	0.35112	-0.791784	2.59136	-1.29164
0.53	1.45093	-0.149478	1.03216	-0.586166	-0.085064	0.663236	0.391048	-0.40355	-0.748146	-0.918708	0.265762	-0.642054	1.40854	-1.23609	0.128856	-3.75613	3.54393			-0.287588	-0.177394	-1.37535	-0.160426	-0.157528	-0.816718	1.61699	-0.016226	0.129976	-0.374052	0.475174	2.26212	2.27846	0.361354	-0.815976	2.60345	-1.30837
0.532	1.48418	-0.148246	1.02949	-0.58611	-0.088746	0.671874	0.410844	-0.370636	-0.766822	-0.907984	0.257516	-0.67032	1.42531	-1.21696	0.124544	-3.78573	3.56286			-0.264194	-0.19012	-1.38337	-0.148204	-0.155106	-0.812896	1.62607	-0.00091	0.161742	-0.385812	0.47103	2.29016	2.2694	0.362096	-0.804832	2.63571	-1.33465
0.534	1.48718	-0.159866	1.06217	-0.59031	-0.115934	0.677908	0.40075	-0.400638	-0.787108	-0.900536	0.249256	-0.665756	1.44763	-1.20452	0.146538	-3.7534	3.63209			-0.28623	-0.190064	-1.39125	-0.152936	-0.159698	-0.844942	1.61312	-0.030072	0.092414	-0.363622	0.453292	2.25935	2.27494	0.369278	-0.793772	2.68443	-1.31995
0.536	1.50765	-0.156212	1.10776	-0.605766	-0.132314	0.67417	0.41608	-0.434168	-0.75782	-0.918988	0.245182	-0.678888	1.46728	-1.2055	0.145698	-3.73435	3.70044			-0.287812	-0.194712	-1.40406	-0.157388	-0.163072	-0.877128	1.55952	-0.006398	0.051282	-0.377664	0.455672	2.22538	2.32967	0.350812	-0.812798	2.62791	-1.25454
0.538	1.47518	-0.166698	1.10474	-0.609056	-0.135562	0.67466	0.419048	-0.408828	-0.756476	-0.910938	0.239134	-0.67571	1.45582	-1.21198	0.166586	-3.7211	3.7109			-0.228172	-0.148358	-1.40841	-0.159824	-0.179956	-0.89516	1.54876	-0.02667	0.045234	-0.383222	0.464702	2.2139	2.35834	0.350294	-0.810348	2.51997	-1.24985
0.54	1.47874	-0.183106	1.10981	-0.609742	-0.134988	0.659946	0.44198	-0.39907	-0.76349	-0.92673	0.246806	-0.641186	1.48172	-1.23295	0.144452	-3.7276	3.70944			-0.23324	-0.153622	-1.40357	-0.165424	-0.15813	-0.907228	1.5548	-0.013776	0.051534	-0.387436	0.4753	2.2241	2.40734	0.360192	-0.818664	2.46	-1.27674
0.542	1.48457	-0.17577	1.13305	-0.60991	-0.141582	0.630882	0.422688	-0.404712	-0.764848	-0.920738	0.25431	-0.645484	1.47841	-1.26113	0.147224	-3.7536	3.70275			-0.223888	-0.170086	-1.39556	-0.15001	-0.158466	-0.89754	1.56944	-0.007616	0.100212	-0.379022	0.470512	2.22695	2.42249	0.370482	-0.813848	2.4876	-1.20705
0.544	1.51383	-0.18032	1.14577	-0.618996	-0.12369	0.649152	0.43967	-0.383222	-0.78575	-0.916384	0.265426	-0.654192	1.4321	-1.27578	0.149408	-3.78918	3.60175			-0.250544	-0.14665	-1.40123	-0.158746	-0.159558	-0.866866	1.59212	-0.00091	0.152824	-0.368018	0.477386	2.25194	2.37748	0.371392	-0.828408	2.56255	-1.20197
0.546	1.50343	-0.16016	1.13282	-0.610946	-0.07504	0.6531	0.433006	-0.408394	-0.779576	-0.94129	0.269584	-0.676984	1.4581	-1.28789	0.144858	-3.81469	3.63355			-0.271936	-0.199192	-1.38758	-0.173124	-0.16765	-0.861924	1.60203	-0.030506	0.140574	-0.37527	0.481418	2.28652	2.38353	0.369698	-0.813204	2.60943	-1.27029
0.548	1.52002	-0.162078	1.1368	-0.608538	-0.068964	0.658812	0.429016	-0.399532	-0.769034	-0.925162	0.277508	-0.691264	1.45991	-1.28275	0.163086	-3.85094	3.69678			-0.268576	-0.1715	-1.37743	-0.181034	-0.15323	-0.869232	1.62567	-0.021952	0.098938	-0.394072	0.482398	2.32434	2.3464	0.372442	-0.83748	2.55955	-1.32339
0.55	1.53544	-0.17073	1.11594	-0.611856	-0.08001	0.630994	0.390418	-0.414484	-0.776552	-0.936726	0.281232	-0.726502	1.4663	-1.26617	0.163926	-3.88006	3.70126			-0.281288	-0.18802	-1.39749	-0.16758	-0.162134	-0.88921	1.6472	-0.008652	0.081788	-0.393974	0.493206	2.31788	2.35997	0.37401	-0.841092	2.47117	-1.28904
0.552	1.5359	-0.151452	1.11426	-0.619234	-0.129262	0.628978	0.396102	-0.41195	-0.77672	-0.92302	0.280672	-0.730072	1.47304	-1.24205	0.148568	-3.87416	3.77768			-0.293636	-0.18795	-1.40073	-0.1589	-0.178276	-0.916496	1.67633	-0.00896	0.032382	-0.391608	0.49966	2.29272	2.39954	0.366996	-0.842016	2.41049	-1.26417
0.554	1.54949	-0.172508	1.16421	-0.612612	-0.13335	0.645106	0.3815	-0.408422	-0.769244	-0.927752	0.28245	-0.702254	1.48313	-1.25531	0.198338	-3.86236	3.83502			-0.279258	-0.200578	-1.41681	-0.14763	-0.186368	-0.917028	1.66685	-0.018438	0.03815	-0.41615	0.487494	2.25084	2.44691	0.374542	-0.870618	2.35465	-1.25583
0.556	1.55725	-0.174132	1.16711	-0.623742	-0.127624	0.66241	0.396956	-0.423318	-0.791	-0.919842	0.261184	-0.673652	1.51494	-1.27302	0.164388	-3.84607	3.79547			-0.267666	-0.18137	-1.4527	-0.142702	-0.176722	-0.926954	1.64522	-0.014266	0.0462	-0.422506	0.475076	2.26003	2.4834	0.385966	-0.859712	2.34795	-1.19178
0.558	1.54092	-0.176638	1.19204	-0.624232	-0.112014	0.631834	0.431662	-0.432908	-0.794766	-0.9338	0.26467	-0.674212	1.50578	-1.29391	0.18354	-3.8593	3.76887			-0.23625	-0.179144	-1.45107	-0.15274	-0.196098	-0.922264	1.61367	-0.026684	0.070196	-0.411516	0.475384	2.26558	2.50218	0.377734	-0.851718	2.42115	-1.19048
0.56	1.57045	-0.176204	1.19242	-0.609616	-0.085806	0.638372	0.445578	-0.423822	-0.775852	-0.945854	0.257278	-0.712082	1.48821	-1.31713	0.167076	-3.91329	3.68712			-0.218722	-0.188776	-1.42593	-0.16359	-0.156618	-0.93037	1.64227	-0.01764	0.110642	-0.403788	0.48139	2.3142	2.50022	0.382046	-0.85106	2.45816	-1.12395
0.562	1.54542	-0.169148	1.2111	-0.622496	-0.092218	0.672084	0.431186	-0.423584	-0.79527	-0.962388	0.256424	-0.716436	1.44186	-1.31663	0.150374	-3.92762	3.71186			-0.245868	-0.181006	-1.42457	-0.164514	-0.144606	-0.916188	1.68375	-0.013636	0.134862	-0.381668	0.48874	2.35109	2.4703	0.38437	-0.859166	2.40674	-1.16362
0.564	1.56458	-0.175056	1.19829	-0.631246	-0.089936	0.67641	0.434756	-0.408086	-0.79387	-0.963242	0.261534	-0.724052	1.41975	-1.31475	0.187208	-3.97261	3.7746			-0.25109	-0.200438	-1.43273	-0.161742	-0.161182	-0.892752	1.67503	-0.007224	0.12488	-0.387744	0.49077	2.37317	2.49207	0.39585	-0.909692	2.34821	-1.20175
0.566	1.56841	-0.165494	1.20695	-0.638848	-0.093002	0.67998	0.440636	-0.415142	-0.792232	-0.976738	0.265538	-0.75068	1.46679	-1.30803	0.155526	-3.99846	3.81004			-0.269416	-0.18956	-1.42388	-0.162512	-0.173138	-0.889336	1.70657	-0.00392	0.066822	-0.397894	0.49406	2.36058	2.48945	0.393946	-0.853104	2.24801	-1.26101
0.568	1.56696	-0.179564	1.16535	-0.642306	-0.127806	0.655116	0.405538	-0.41748	-0.794724	-0.992432	0.276626	-0.72625	1.50084	-1.29686	0.18998	-3.99342	3.8738			-0.246498	-0.195902	-1.425	-0.171332	-0.170156	-0.925582	1.7106	-0.003402	0.059276	-0.390754	0.492464	2.35833	2.47799	0.392266	-0.845194	2.19388	-1.20152
0.57	1.60474	-0.198898	1.17019	-0.643426	-0.113568	0.631904	0.386008	-0.42917	-0.801052	-0.988834	0.286818	-0.73339	1.54379	-1.28549	0.177002	-3.97634	3.91357			-0.251076	-0.183694	-1.43038	-0.159586	-0.17332	-0.947268	1.71744	-0.015764	0.054502	-0.412076	0.503944	2.32683	2.52193	0.3794	-0.860776	2.15536	-1.15598
0.572	1.60223	-0.173824	1.21104	-0.628936	-0.124768	0.631904	0.368732	-0.420154	-0.812056	-0.964446	0.290598	-0.718606	1.53895	-1.2955	0.215138	-3.96063	3.95737			-0.2604	-0.160062	-1.4527	-0.161742	-0.16758	-0.95676	1.71632	-0.01449	0.07056	-0.380562	0.513086	2.31266	2.54694	0.383572	-0.943656	2.18695	-1.09528
0.574	1.60112	-0.16037	1.21667	-0.62965	-0.117236	0.655942	0.367458	-0.41657	-0.823732	-0.981778	0.29862	-0.700924	1.53089	-1.3221	0.172606	-3.95905	3.93112			-0.286328	-0.154182	-1.46548	-0.163464	-0.18186	-0.919478	1.72992	-0.024738	0.064834	-0.395766	0.513142	2.32441	2.5716	0.3955	-0.849086	2.22253	-1.10687
0.576	1.63082	-0.212786	1.22704	-0.636174	-0.121954	0.70392	0.401492	-0.427168	-0.854056	-0.975618	0.291914	-0.73192	1.51123	-1.34725	0.188412	-3.99007	3.87152			-0.25263	-0.179046	-1.48375	-0.164724	-0.192668	-0.925428	1.71317	-0.023002	0.132678	-0.422044	0.503832	2.36362	2.55254	0.40152	-0.864808	2.25557	-1.07667
0.578	1.58837	-0.183302	1.24639	-0.63882	-0.093044	0.705992	0.397824	-0.461888	-0.822416	-0.99617	0.2828	-0.76279	1.46013	-1.35316	0.152376	-4.0094	3.80793			-0.23674	-0.193382	-1.4933	-0.160902	-0.182686	-0.924224	1.72602	-0.020104	0.086702	-0.403256	0.510216	2.40262	2.53235	0.399602	-0.859782	2.18775	-1.0978
0.58	1.61486	-0.190904	1.22916	-0.646226	-0.102242	0.70826	0.388444	-0.439404	-0.797314	-0.993104	0.280924	-0.767998	1.47979	-1.35353	0.185738	-4.04547	3.88606			-0.29407	-0.177772	-1.4944	-0.151298	-0.135688	-0.948808	1.73058	-0.01806	0.116536	-0.385742	0.50211	2.42841	2.51671	0.405902	-0.874622	2.07813	-1.15147
0.582	1.60938	-0.181636	1.26904	-0.654696	-0.137298	0.711802	0.389732	-0.425446	-0.80304	-1.0004	0.282898	-0.800086	1.52443	-1.33665	0.192542	-4.03493	3.90134			-0.259056	-0.203546	-1.43479	-0.155414	-0.165704	-0.91854	1.75594	-0.009674	0.080164	-0.399784	0.498932	2.43313	2.5312	0.404376	-0.890148	2.02241	-1.16274
0.584	1.62625	-0.175364	1.2747	-0.651266	-0.111188	0.71925	0.400316	-0.432292	-0.796446	-1.00762	0.265706	-0.80745	1.56029	-1.32758	0.166768	-3.99907	3.95632			-0.260988	-0.18585	-1.43277	-0.15533	-0.17542	-0.919478	1.76085	-0.02016	0.062622	-0.390796	0.499184	2.41087	2.53088	0.405944	-0.860454	1.96062	-1.1286
0.586	1.61182	-0.188622	1.2714	-0.65058	-0.12628	0.690368	0.400708	-0.41447	-0.824236	-1.01094	0.268492	-0.79681	1.57429	-1.31964	0.191632	-3.99419	3.99445			-0.254954	-0.204904	-1.4348	-0.180782	-0.20118	-0.942536	1.75935	-0.00245	0.070966	-0.416108	0.501704	2.40065	2.58637	0.401562	-0.88942	2.00152	-1.1185
0.588	1.62226	-0.217378	1.24935	-0.652456	-0.128282	0.67718	0.399294	-0.435218	-0.861	-1.00687	0.269962	-0.770672	1.57398	-1.34099	0.187712	-3.98861	4.07151			-0.249844	-0.206192	-1.44224	-0.197932	-0.184576	-0.950852	1.7642	-0.01855	0.078204	-0.404656	0.507626	2.37467	2.62557	0.407778	-0.888328	2.01321	-1.04978
0.59	1.63496	-0.193942	1.2293	-0.653842	-0.115626	0.660016	0.40096	-0.445256	-0.85848	-1.00773	0.285166	-0.751464	1.58281	-1.37446	0.179228	-4.03829	4.05143			-0.25186	-0.181342	-1.47763	-0.192612	-0.188468	-0.945588	1.75245	-0.025298	0.058086	-0.420798	0.514486	2.38071	2.60646	0.405692	-0.8834	2.0588	-1.04544
0.592	1.66134	-0.204792	1.24515	-0.66157	-0.135814	0.694106	0.415044	-0.43694	-0.835842	-1.00304	0.298018	-0.760648	1.49442	-1.38109	0.199864	-4.06308	4.04396			-0.25473	-0.162932	-1.49321	-0.172536	-0.178458	-0.923538	1.75966	-0.031052	0.089362	-0.422324	0.517762	2.39457	2.57547	0.404292	-0.917098	2.05493	-1.0351
0.594	1.65523	-0.210938	1.26987	-0.657636	-0.11088	0.70301	0.453012	-0.444094	-0.857066	-1.03762	0.297934	-0.784854	1.4951	-1.39623	0.18851	-4.063	3.96613			-0.282408	-0.177702	-1.48716	-0.16247	-0.210448	-0.938014	1.76399	-0.026488	0.114744	-0.42728	0.521528	2.42974	2.59308	0.418138	-0.889826	1.96339	-0.994308
0.596	1.67422	-0.218218	1.28419	-0.662438	-0.123592	0.712166	0.466536	-0.423696	-0.850528	-1.0586	0.298606	-0.8071	1.5233	-1.39338	0.189266	-4.06577	3.96497			-0.310338	-0.21224	-1.50364	-0.164304	-0.174314	-0.950922	1.77653	-0.015722	0.121184	-0.402094	0.529494	2.47309	2.58038	0.428134	-0.905128	1.85802	-1.04997
0.598	1.65495	-0.212016	1.27817	-0.675388	-0.11193	0.719558	0.460138	-0.450562	-0.865088	-1.05781	0.31325	-0.836416	1.55443	-1.37038	0.193158	-4.04138	4.00683			-0.292824	-0.203252	-1.50875	-0.170324	-0.163016	-0.973966	1.75315	-0.03087	0.091182	-0.421554	0.532672	2.50454	2.58728	0.42539	-0.886074	1.78819	-1.06772
0.6	1.68211	-0.190176	1.29387	-0.668906	-0.117418	0.719166	0.452564	-0.455434	-0.834078	-1.04475	0.311066	-0.860314	1.56498	-1.35979	0.196042	-4.02116	4.01951			-0.29932	-0.20538	-1.50457	-0.170814	-0.160356	-1.00695	1.75979	-0.034342	0.078092	-0.41769	0.53781	2.48199	2.63043	0.42364	-0.88291	1.75526	-1.08507
0.602	1.67044	-0.201082	1.3235	-0.663208	-0.123298	0.722176	0.421204	-0.462602	-0.860902	-1.03569	0.301952	-0.831306	1.60068	-1.35787	0.217518	-3.98271	4.05749			-0.289002	-0.187838	-1.48319	-0.184828	-0.1764	-1.00244	1.78499	-0.015358	0.070182	-0.436086	0.527996	2.48976	2.64656	0.409864	-0.906584	1.76021	-1.01669
0.604	1.67012	-0.20951	1.31188	-0.66675	-0.115248	0.69587	0.442036	-0.444206	-0.86331	-1.05391	0.294546	-0.850108	1.62516	-1.36286	0.211722	-3.97165	4.11025			-0.32011	-0.226366	-1.48372	-0.178444	-0.19369	-0.961674	1.77631	-0.01526	0.066164	-0.440636	0.513226	2.44824	2.66595	0.409808	-0.909314	1.77992	-0.979076
0.606	1.6855	-0.216972	1.32191	-0.674002	-0.132314	0.687106	0.455812	-0.435316	-0.881482	-1.05802	0.290626	-0.82971	1.59442	-1.38874	0.195734	-3.99727	4.12979			-0.289436	-0.217392	-1.48081	-0.174482	-0.19663	-0.954688	1.79306	-0.02625	0.080528	-0.433678	0.510874	2.44581	2.66732	0.419874	-0.933002	1.78269	-0.954576
0.608	1.66919	-0.238364	1.28971	-0.687106	-0.118426	0.708274	0.43344	-0.45563	-0.89663	-1.05834	0.280084	-0.82404	1.53566	-1.40491	0.202006	-4.03018	4.14704			-0.296898	-0.194908	-1.51698	-0.194376	-0.17577	-0.975044	1.79834	-0.02527	0.06895	-0.425894	0.515508	2.46058	2.67576	0.434308	-0.908726	1.81714	-0.913402
0.61	1.68885	-0.230902	1.26867	-0.696304	-0.119868	0.703262	0.448938	-0.451472	-0.903042	-1.04839	0.289422	-0.838572	1.54182	-1.42492	0.176484	-4.04824	4.12649			-0.281064	-0.183288	-1.51928	-0.186424	-0.169904	-0.978698	1.80004	-0.041342	0.093422	-0.428078	0.515242	2.48571	2.66766	0.437822	-0.927528	1.75482	-0.973392
0.612	1.6962	-0.235676	1.30521	-0.68285	-0.122262	0.687288	0.467362	-0.47124	-0.88004	-1.0465	0.294602	-0.853328	1.5797	-1.43311	0.199934	-4.0707	4.0711			-0.28987	-0.204736	-1.53716	-0.181118	-0.179018	-0.99652	1.78613	-0.018578	0.098266	-0.442974	0.525714	2.55066	2.64351	0.438942	-0.952952	1.66527	-0.954632
0.614	1.7075	-0.214214	1.34681	-0.68306	-0.12236	0.71134	0.525798	-0.455364	-0.873852	-1.07685	0.308126	-0.892178	1.59408	-1.41758	0.214606	-4.05996	4.05884			-0.289898	-0.198072	-1.54175	-0.168854	-0.140966	-1.00377	1.7981	-0.019278	0.097916	-0.43974	0.53634	2.585	2.65072	0.439754	-0.976262	1.58571	-0.951776
0.616	1.71448	-0.21938	1.32112	-0.679994	-0.11613	0.72079	0.523852	-0.454776	-0.852572	-1.09096	0.31717	-0.950908	1.61455	-1.40031	0.215978	-4.02228	4.07602			-0.300468	-0.198058	-1.55648	-0.177296	-0.16366	-1.01353	1.7932	-0.0112	0.082516	-0.446012	0.53767	2.56746	2.68016	0.438088	-0.930132	1.56493	-0.992894
0.618	1.70502	-0.208782	1.36466	-0.680414	-0.093758	0.72065	0.517286	-0.452788	-0.87507	-1.09241	0.317352	-0.893872	1.62553	-1.39104	0.213458	-4.02462	4.13119			-0.284634	-0.217574	-1.52891	-0.181328	-0.160664	-1.03583	1.80503	-0.01365	0.064064	-0.419762	0.54999	2.54957	2.71002	0.43596	-0.990402	1.57752	-0.980812
0.62	1.73013	-0.218904	1.38834	-0.679448	-0.100268	0.710724	0.51163	-0.492828	-0.870408	-1.09385	0.325808	-0.902706	1.6387	-1.38897	0.20328	-3.98653	4.16007			-0.276444	-0.21924	-1.49699	-0.184702	-0.17969	-1.05704	1.79551	-0.017402	0.048482	-0.42336	0.552776	2.5256	2.71603	0.43575	-0.941192	1.59067	-0.922096
0.622	1.72593	-0.212604	1.37757	-0.68747	-0.110768	0.686882	0.467544	-0.464506	-0.897498	-1.09424	0.328384	-0.85624	1.59608	-1.40732	0.194502	-4.01489	4.18859			-0.30961	-0.202146	-1.51462	-0.191002	-0.183988	-1.03788	1.831	-0.020916	0.065198	-0.429002	0.54208	2.52302	2.74257	0.43666	-0.945126	1.60594	-0.884576
0.624	1.72423	-0.22274	1.37246	-0.696836	-0.137592	0.694456	0.456008	-0.481964	-0.908208	-1.09805	0.327824	-0.840812	1.57107	-1.4405	0.207256	-4.0474	4.22355			-0.3227	-0.209524	-1.50647	-0.189826	-0.178318	-0.997752	1.82823	-0.003402	0.066094	-0.439152	0.53515	2.52564	2.7102	0.445424	-0.944636	1.58155	-0.831264
0.626	1.73674	-0.21742	1.35524	-0.699062	-0.125076	0.72142	0.454258	-0.464744	-0.922278	-1.08431	0.318892	-0.904652	1.5868	-1.45337	0.170898	-4.02704	4.22367			-0.311136	-0.192388	-1.51764	-0.190722	-0.196728	-0.980364	1.8625	-0.011802	0.067886	-0.451514	0.536116	2.57641	2.71849	0.444122	-0.965328	1.54484	-0.887754
0.628	1.73292	-0.214046	1.34368	-0.68866	-0.120302	0.735224	0.48503	-0.455294	-0.92022	-1.08973	0.313222	-0.909846	1.62306	-1.46735	0.161714	-4.0262	4.18027			-0.274092	-0.159796	-1.53994	-0.191408	-0.19432	-1.02196	1.86523	-0.013916	0.087528	-0.450226	0.521528	2.59204	2.72124	0.4564	-0.954352	1.44327	-0.903238
0.63	1.76415	-0.25193	1.3533	-0.69209	-0.11291	0.71036	0.545342	-0.474306	-0.9128	-1.09557	0.306488	-0.925582	1.62729	-1.45344	0.185346	-4.01211	4.1112			-0.261394	-0.22162	-1.55047	-0.2093	-0.175504	-1.03244	1.84922	-0.02387	0.091378	-0.479374	0.52164	2.63113	2.73227	0.452858	-0.972468	1.35878	-0.886032
0.632	1.78888	-0.22764	1.40451	-0.693602	-0.107716	0.72723	0.578312	-0.493556	-0.919842	-1.09285	0.2989	-0.953694	1.64858	-1.45092	0.21798	-3.98615	4.15505			-0.266924	-0.203028	-1.53964	-0.197022	-0.127764	-1.04343	1.82314	-0.024724	0.104034	-0.472108	0.52885	2.61883	2.76627	0.455364	-0.95459	1.2871	-0.888692
0.634	1.78175	-0.225162	1.4197	-0.708442	-0.110096	0.749042	0.595518	-0.4858	-0.88879	-1.08409	0.308028	-0.942522	1.66275	-1.43051	0.225526	-3.96626	4.1452			-0.269738	-0.217238	-1.5381	-0.191156	-0.148064	-1.04643	1.79663	-0.024136	0.11319	-0.469882	0.540568	2.62186	2.81747	0.449022	-0.997094	1.28061	-0.917308
0.636	1.7619	-0.214228	1.44061	-0.700098	-0.116158	0.73339	0.642152	-0.474278	-0.886606	-1.10677	0.318262	-0.942354	1.65924	-1.4322	0.186788	-3.95636	4.19381			-0.280742	-0.205688	-1.54713	-0.18284	-0.173502	-1.07754	1.8305	-0.013342	0.086884	-0.460628	0.54481	2.58209	2.83926	0.452354	-0.9499	1.3524	-0.861462
0.638	1.75763	-0.221004	1.46962	-0.704732	-0.111258	0.734174	0.5859	-0.454636	-0.901726	-1.1152	0.328482	-0.917238	1.59296	-1.44458	0.200732	-3.98059	4.24922			-0.24584	-0.21665	-1.51375	-0.176246	-0.16828	-1.04685	1.85542	-0.011256	0.092624	-0.443562	0.543718	2.57922	2.80708	0.448756	-0.992558	1.36342	-0.823396
0.64	1.81208	-0.214942	1.46639	-0.707126	-0.127568	0.740194	0.528654	-0.502698	-0.883736	-1.11782	0.33145	-0.920052	1.58052	-1.46863	0.200046	-3.98742	4.27998			-0.286104	-0.220444	-1.52162	-0.167944	-0.195202	-1.07043	1.90679	-0.022988	0.094038	-0.463232	0.546154	2.57408	2.80888	0.458864	-0.975674	1.38494	-0.777966
0.642	1.77733	-0.243768	1.43836	-0.704074	-0.106736	0.730814	0.475314	-0.492156	-0.924826	-1.13583	0.339388	-0.938658	1.60847	-1.49884	0.206332	-3.96941	4.31529			-0.31493	-0.210182	-1.52785	-0.176008	-0.193284	-1.06341	1.89445	-0.018928	0.086002	-0.48146	0.557844	2.59596	2.81098	0.459228	-0.982464	1.33529	-0.76426
0.644	1.77913	-0.190176	1.43251	-0.694778	-0.117698	0.795662	0.503118	-0.490574	-0.926758	-1.11371	0.348138	-0.983416	1.65147	-1.5057	0.207074	-3.94892	4.32257			-0.329238	-0.187124	-1.54899	-0.185542	-0.189266	-1.05637	1.90523	0.001736	0.090384	-0.477288	0.555128	2.65394	2.79654	0.45927	-0.982534	1.27995	-0.725648
0.646	1.80102	-0.223552	1.42176	-0.698586	-0.10962	0.793184	0.536116	-0.468706	-0.922516	-1.09266	0.34832	-1.01611	1.65686	-1.50339	0.181622	-3.94199	4.26178			-0.285712	-0.172004	-1.544	-0.193872	-0.205394	-1.00023	1.88112	0.001708	0.091	-0.499912	0.550732	2.66294	2.83115	0.470008	-1.00055	1.18544	-0.766766
0.648	1.81489	-0.248934	1.45155	-0.70791	-0.108948	0.78015	0.578718	-0.481726	-0.927514	-1.08895	0.347466	-1.04059	1.66398	-1.50167	0.17199	-3.92529	4.22531			-0.271712	-0.193144	-1.55424	-0.199626	-0.198142	-1.06614	1.86437	0.004312	0.091756	-0.514248	0.553518	2.61618	2.88672	0.472654	-0.996156	1.1103	-0.780542
0.65	1.82179	-0.253414	1.46621	-0.72744	-0.102802	0.723086	0.614236	-0.494144	-0.947324	-1.11595	0.328048	-1.02886	1.67213	-1.47979	0.167188	-3.88256	4.23507			-0.24675	-0.178024	-1.57494	-0.207998	-0.16604	-1.09151	1.84639	-0.01421	0.070518	-0.496748	0.542304	2.62196	2.88966	0.46564	-0.979552	1.00262	-0.79604
0.652	1.83256	-0.245672	1.46866	-0.729064	-0.094094	0.719712	0.608622	-0.496552	-0.93842	-1.09995	0.336014	-1.02917	1.66747	-1.47692	0.18466	-3.86478	4.27391			-0.260988	-0.190344	-1.56715	-0.202076	-0.169176	-1.085	1.82886	-0.02562	0.04522	-0.48419	0.54593	2.59573	2.88672	0.463596	-0.994056	1.06855	-0.775502
0.654	1.83883	-0.2289	1.48035	-0.725466	-0.119546	0.751562	0.636132	-0.49168	-0.912772	-1.1228	0.32851	-0.963914	1.61732	-1.46793	0.190498	-3.88851	4.31071			-0.274876	-0.21406	-1.56901	-0.188944	-0.185906	-1.08982	1.85417	-0.014028	0.066486	-0.47383	0.541408	2.61262	2.8938	0.457744	-0.993916	1.06277	-0.73136
0.656	1.85632	-0.212646	1.51067	-0.719026	-0.106708	0.783846	0.613074	-0.477232	-0.906626	-1.11213	0.326984	-0.99729	1.61283	-1.48154	0.177338	-3.89498	4.34981			-0.2968	-0.21238	-1.53992	-0.189392	-0.21427	-1.06386	1.89505	-0.006342	0.072212	-0.466886	0.547708	2.64263	2.86636	0.461636	-0.99414	1.06432	-0.694694
0.658	1.85639	-0.225246	1.51501	-0.720398	-0.111384	0.767494	0.576394	-0.492156	-0.914172	-1.15034	0.329112	-1.03912	1.65791	-1.49369	0.181818	-3.9065	4.40573			-0.328818	-0.2212	-1.54703	-0.196	-0.202972	-1.06588	1.94608	-0.008638	0.087248	-0.504098	0.550088	2.64928	2.87496	0.473928	-0.995988	1.13896	-0.645526
0.66	1.83487	-0.22134	1.4937	-0.715008	-0.102634	0.752542	0.541548	-0.476462	-0.908516	-1.13291	0.341348	-1.06186	1.69499	-1.52872	0.170114	-3.87716	4.38319			-0.32991	-0.227178	-1.54307	-0.193816	-0.191338	-1.10179	1.96281	-0.020244	0.096348	-0.500178	0.556192	2.66675	2.8863	0.470106	-0.99666	1.07894	-0.687764
0.662	1.85503	-0.228102	1.49523	-0.728	-0.122108	0.789516	0.550522	-0.525224	-0.917742	-1.12692	0.353766	-1.09654	1.71977	-1.54693	0.179914	-3.83747	4.37853			-0.33614	-0.216916	-1.54465	-0.187656	-0.16499	-1.11083	1.95833	-0.036638	0.083818	-0.501816	0.563724	2.68027	2.92414	0.47327	-1.01272	0.986818	-0.693784
0.664	1.85297	-0.210252	1.50291	-0.730198	-0.097958	0.79261	0.531384	-0.514906	-0.933842	-1.10844	0.357112	-1.115	1.70547	-1.5597	0.15932	-3.85057	4.29867			-0.31479	-0.187544	-1.55296	-0.18606	-0.196938	-1.12659	1.94165	-0.022666	0.085134	-0.4991	0.563374	2.70022	2.96519	0.475328	-0.997612	0.954842	-0.717808
0.666	1.86358	-0.23681	1.5197	-0.729428	-0.101192	0.770266	0.550634	-0.500724	-0.95109	-1.1433	0.360052	-1.08356	1.71206	-1.55481	0.164346	-3.80866	4.30563			-0.243628	-0.202258	-1.55198	-0.179424	-0.152558	-1.09931	1.9221	0.001372	0.066836	-0.512848	0.575778	2.68005	2.99638	0.483224	-1.0116	0.802886	-0.698908
0.668	1.85469	-0.251132	1.50461	-0.730926	-0.119266	0.739886	0.605388	-0.489496	-0.925316	-1.15401	0.364224	-1.09092	1.70593	-1.53569	0.182602	-3.77168	4.30984			-0.232148	-0.205842	-1.5617	-0.201236	-0.178878	-1.0836	1.90183	-0.016716	0.063742	-0.51212	0.577206	2.66577	2.99193	0.483476	-1.02341	0.792092	-0.70378
0.67	1.88203	-0.250082	1.54416	-0.74865	-0.118412	0.755972	0.618184	-0.488628	-0.95312	-1.12402	0.37163	-1.06306	1.65234	-1.51956	0.184576	-3.76561	4.3611			-0.23436	-0.234402	-1.59585	-0.21112	-0.177576	-1.09693	1.92326	-0.013734	0.049924	-0.51744	0.575092	2.65565	2.97198	0.482328	-1.01613	0.808528	-0.715498
0.672	1.91311	-0.241864	1.54546	-0.74312	-0.101472	0.76034	0.627046	-0.494046	-0.93905	-1.14589	0.361886	-1.05081	1.64984	-1.51983	0.210686	-3.78036	4.38575			-0.274302	-0.222824	-1.59695	-0.222208	-0.174538	-1.08685	1.9346	-0.015638	0.055342	-0.509068	0.563752	2.64173	2.97149	0.47222	-0.998634	0.834512	-0.663208
0.674	1.89451	-0.211372	1.54029	-0.737128	-0.117978	0.756714	0.628908	-0.514066	-0.915796	-1.14454	0.352814	-1.06544	1.67464	-1.51914	0.231182	-3.78384	4.44388			-0.31206	-0.216776	-1.59215	-0.220332	-0.188314	-1.10306	1.95233	-0.023982	0.04011	-0.51023	0.563108	2.69368	2.98504	0.462028	-1.00472	0.910518	-0.592592
0.676	1.8654	-0.223104	1.54812	-0.733544	-0.12537	0.747628	0.619724	-0.497042	-0.933366	-1.15784	0.356818	-1.11818	1.68886	-1.55105	0.214088	-3.80237	4.49421			-0.344582	-0.23016	-1.59064	-0.216958	-0.191912	-1.11124	1.96098	-0.011186	0.029554	-0.505806	0.556612	2.70122	3.00426	0.474894	-1.03972	0.890344	-0.540596
0.678	1.89692	-0.233114	1.57	-0.743092	-0.130144	0.760816	0.586474	-0.501438	-0.918848	-1.14076	0.344638	-1.16213	1.68315	-1.57854	0.168882	-3.78666	4.49182			-0.369124	-0.23002	-1.57084	-0.207004	-0.195384	-1.10956	1.9594	-0.007532	0.05215	-0.505442	0.553462	2.73179	3.02996	0.482202	-1.03473	0.837354	-0.599564
0.68	1.89288	-0.226982	1.56377	-0.753382	-0.10654	0.775334	0.557802	-0.49364	-0.924294	-1.15602	0.346164	-1.17492	1.70754	-1.58904	0.152348	-3.77115	4.41573			-0.336742	-0.229264	-1.5777	-0.209272	-0.206346	-1.15447	2.00803	-0.005656	0.053802	-0.514234	0.554344	2.75863	3.07226	0.488418	-1.02537	0.749854	-0.641144
0.682	1.90438	-0.215446	1.5562	-0.75292	-0.09723	0.752052	0.563934	-0.515816	-0.94668	-1.17949	0.349818	-1.18157	1.70797	-1.59958	0.184674	-3.76362	4.39263			-0.305466	-0.198772	-1.56961	-0.209748	-0.195818	-1.16899	2.01173	-0.045864	0.056126	-0.546728	0.564998	2.72049	3.07937	0.491386	-1.02145	0.664692	-0.650608
0.684	1.90564	-0.240324	1.56422	-0.75208	-0.101738	0.728812	0.5719	-0.537964	-0.949326	-1.18388	0.371112	-1.16151	1.68542	-1.585	0.202622	-3.72362	4.41637			-0.269962	-0.214284	-1.57112	-0.202202	-0.175154	-1.17534	1.98661	-0.022694	0.067074	-0.522928	0.573874	2.70459	3.06684	0.500332	-1.00094	0.588644	-0.631204
0.686	1.9277	-0.259924	1.5556	-0.740138	-0.112574	0.754544	0.61425	-0.523516	-0.973042	-1.18474	0.371224	-1.13032	1.65159	-1.56974	0.222236	-3.68154	4.43096			-0.22652	-0.219212	-1.59729	-0.187404	-0.191212	-1.14108	1.98664	-0.02212	0.058548	-0.51394	0.582372	2.71225	3.05872	0.492072	-0.999432	0.553658	-0.659232
0.688	1.94816	-0.2583	1.57539	-0.734734	-0.121674	0.750344	0.6237	-0.51324	-0.960008	-1.17379	0.375298	-1.11146	1.66131	-1.55495	0.20139	-3.6829	4.48472			-0.246386	-0.228746	-1.61024	-0.193928	-0.191268	-1.11524	1.97568	-0.01043	0.078624	-0.51527	0.586124	2.70414	3.05012	0.498204	-1.02729	0.60004	-0.570864
0.69	1.92178	-0.244594	1.59587	-0.740712	-0.134232	0.785358	0.614292	-0.502992	-0.962654	-1.16661	0.375774	-1.16252	1.69862	-1.55603	0.181384	-3.6871	4.51842			-0.267386	-0.239694	-1.61417	-0.206654	-0.193466	-1.11716	1.97926	-0.036358	0.061852	-0.508018	0.591598	2.72584	3.04794	0.486234	-1.01681	0.615594	-0.575428
0.692	1.90723	-0.247338	1.61059	-0.756952	-0.109158	0.785834	0.600208	-0.521556	-0.945406	-1.17138	0.386428	-1.1856	1.71779	-1.5766	0.183694	-3.71661	4.53165			-0.287462	-0.22512	-1.62037	-0.212352	-0.184772	-1.13471	1.98286	-0.019628	0.073486	-0.521878	0.590982	2.74634	3.09901	0.497994	-1.04476	0.625352	-0.490252
0.694	1.92605	-0.241612	1.61827	-0.771414	-0.10752	0.75558	0.618576	-0.524398	-0.934766	-1.1838	0.383796	-1.20949	1.69414	-1.60401	0.184618	-3.75694	4.58928			-0.321776	-0.208306	-1.64034	-0.220066	-0.1967	-1.16134	2.03073	-0.019768	0.07966	-0.52297	0.593236	2.79385	3.08699	0.491834	-1.04202	0.643202	-0.466032
0.696	1.90106	-0.248598	1.63596	-0.761222	-0.11564	0.744828	0.598122	-0.532826	-0.95074	-1.19153	0.379638	-1.2444	1.71476	-1.6157	0.191912	-3.73878	4.56658			-0.309302	-0.24997	-1.62516	-0.205114	-0.209622	-1.17986	2.03487	-0.02751	0.054614	-0.520212	0.588868	2.79811	3.16995	0.494298	-1.02204	0.61691	-0.474026
0.698	1.93004	-0.23513	1.65277	-0.75817	-0.130284	0.778988	0.584822	-0.540512	-0.953932	-1.18875	0.370552	-1.23162	1.69176	-1.62677	0.187852	-3.69302	4.52176			-0.300188	-0.221102	-1.58691	-0.203098	-0.184884	-1.15196	2.02398	-0.013678	0.06125	-0.533316	0.57904	2.75491	3.19934	0.508018	-1.02483	0.476182	-0.52332
0.7	1.94285	-0.235018	1.64266	-0.765856	-0.10234	0.822276	0.56231	-0.514696	-0.97587	-1.17701	0.363118	-1.22501	1.7113	-1.63324	0.222502	-3.67396	4.49079			-0.253694	-0.223748	-1.60006	-0.21224	-0.201264	-1.15524	2.01389	-0.031122	0.058226	-0.535108	0.570458	2.76972	3.18046	0.509474	-1.03088	0.450632	-0.56462
0.702	1.94491	-0.27111	1.6403	-0.757162	-0.111412	0.833266	0.58709	-0.540204	-0.991158	-1.18534	0.360808	-1.22356	1.68848	-1.61592	0.196644	-3.61771	4.47569			-0.19838	-0.210056	-1.60077	-0.218442	-0.203266	-1.1523	2.04966	-0.046382	0.062272	-0.5208	0.566216	2.7391	3.14195	0.510846	-1.02848	0.347578	-0.580916
0.704	1.97485	-0.266336	1.63376	-0.767452	-0.11067	0.803166	0.59038	-0.534478	-0.96355	-1.20085	0.366128	-1.21185	1.68091	-1.60754	0.194278	-3.60976	4.48833			-0.213626	-0.231798	-1.59328	-0.215894	-0.179074	-1.14716	2.05661	-0.029428	0.070882	-0.542136	0.58128	2.77808	3.14829	0.507346	-1.05468	0.38143	-0.556304
0.706	1.96998	-0.26796	1.61974	-0.773794	-0.121338	0.803418	0.59255	-0.521206	-0.968352	-1.18262	0.373856	-1.19903	1.70113	-1.5932	0.187824	-3.61467	4.54716			-0.214228	-0.204386	-1.61287	-0.204694	-0.195398	-1.19363	2.07864	-0.019376	0.1008	-0.55979	0.584262	2.78713	3.13452	0.503202	-1.03818	0.390586	-0.518896
0.708	1.95951	-0.251972	1.63687	-0.768586	-0.134862	0.789334	0.598892	-0.52941	-0.97454	-1.18524	0.381472	-1.23614	1.7136	-1.60293	0.163478	-3.61829	4.57012			-0.218624	-0.227934	-1.61001	-0.199024	-0.178052	-1.16844	2.07075	-0.00231	0.083538	-0.552398	0.585634	2.80468	3.12431	0.507164	-1.05083	0.467012	-0.493794
0.71	1.96706	-0.250306	1.64913	-0.78022	-0.11529	0.76188	0.615244	-0.519876	-0.960064	-1.21737	0.391902	-1.29359	1.72747	-1.61811	0.17801	-3.635	4.62099			-0.272804	-0.23317	-1.63689	-0.205338	-0.202706	-1.1839	2.05166	-0.039018	0.07973	-0.517888	0.594678	2.83779	3.18389	0.512456	-1.05948	0.388682	-0.438942
0.712	1.97193	-0.246484	1.68318	-0.777112	-0.117432	0.799834	0.61621	-0.537306	-0.950418	-1.23313	0.40054	-1.31418	1.74265	-1.64991	0.21217	-3.64882	4.65018			-0.248206	-0.237356	-1.66095	-0.215446	-0.184198	-1.18447	2.08197	-0.029428	0.051422	-0.521906	0.602714	2.8441	3.21888	0.517076	-1.038	0.463302	-0.401968
0.714	1.97833	-0.262794	1.68253	-0.782096	-0.108234	0.782068	0.611492	-0.52325	-0.956312	-1.23313	0.401338	-1.31991	1.74468	-1.67558	0.173908	-3.6038	4.62372			-0.25151	-0.248892	-1.66131	-0.230356	-0.177702	-1.19704	2.09049	-0.03787	0.0623	-0.518014	0.610288	2.82925	3.21909	0.523768	-1.05291	0.33334	-0.435386
0.716	2.00035	-0.247464	1.68039	-0.780346	-0.108556	0.802018	0.615384	-0.53214	-0.975086	-1.25049	0.403494	-1.31468	1.72059	-1.6725	0.184506	-3.56744	4.57796			-0.24388	-0.221984	-1.61979	-0.227976	-0.187894	-1.18139	2.11015	-0.034244	0.04914	-0.535584	0.605752	2.84129	3.21143	0.521136	-1.0649	0.248052	-0.50365
0.718	2.00249	-0.26264	1.6982	-0.786352	-0.126336	0.798308	0.625016	-0.52157	-0.9933	-1.25121	0.404026	-1.31802	1.68683	-1.66949	0.177352	-3.52478	4.52263			-0.234976	-0.2345	-1.60968	-0.22974	-0.165088	-1.19172	2.12349	-0.0231	0.06489	-0.536256	0.597996	2.80603	3.20452	0.534492	-1.06074	0.168	-0.463834
0.72	1.99837	-0.276668	1.70657	-0.784126	-0.116494	0.781564	0.5929	-0.526232	-0.98609	-1.22308	0.394534	-1.2843	1.70962	-1.65449	0.17682	-3.48264	4.53799			-0.197652	-0.203714	-1.61309	-0.223986	-0.217896	-1.20933	2.14145	-0.021378	0.072254	-0.553364	0.596708	2.81368	3.21896	0.526652	-1.06452	0.14938	-0.445928
0.722	2.00316	-0.274736	1.69092	-0.79198	-0.121632	0.788424	0.549136	-0.551222	-1.00401	-1.22846	0.390222	-1.2922	1.74796	-1.6472	0.16366	-3.49626	4.55661			-0.204246	-0.232694	-1.60899	-0.232134	-0.202636	-1.21916	2.15177	-0.05509	0.084546	-0.532364	0.59619	2.82225	3.21041	0.524048	-1.07194	0.224728	-0.47831
0.724	2.01422	-0.290178	1.6834	-0.796866	-0.138908	0.800632	0.584682	-0.556192	-1.01865	-1.23696	0.392854	-1.32518	1.73958	-1.63724	0.165774	-3.46087	4.58636			-0.216328	-0.21931	-1.61508	-0.228116	-0.188972	-1.23679	2.18602	-0.049112	0.089852	-0.575344	0.602294	2.83587	3.23179	0.516418	-1.08241	0.194026	-0.450772
0.726	2.01419	-0.270354	1.67874	-0.783986	-0.132664	0.777798	0.575946	-0.540008	-0.995232	-1.23333	0.391524	-1.34868	1.75525	-1.6361	0.175196	-3.5049	4.62769			-0.210364	-0.229726	-1.64791	-0.214564	-0.193942	-1.25567	2.16728	-0.060438	0.100338	-0.571984	0.602434	2.87013	3.26442	0.513632	-1.06449	0.221928	-0.384496
0.728	2.02357	-0.26194	1.70022	-0.786534	-0.110824	0.772044	0.6244	-0.534408	-0.988554	-1.24173	0.383586	-1.37367	1.75869	-1.66705	0.151942	-3.56567	4.67655			-0.241192	-0.21679	-1.63692	-0.210042	-0.200228	-1.23382	2.15037	-0.032452	0.076804	-0.546504	0.606424	2.89096	3.31031	0.529956	-1.07615	0.272342	-0.34895
0.73	2.00008	-0.280672	1.71298	-0.775194	-0.14728	0.726446	0.642908	-0.533344	-0.976934	-1.2531	0.387688	-1.3795	1.74544	-1.68692	0.171976	-3.50343	4.69409			-0.223958	-0.24101	-1.64825	-0.212954	-0.204834	-1.22839	2.13998	-0.012446	0.080318	-0.55349	0.609672	2.84456	3.3091	0.5383	-1.07365	0.159544	-0.290822
0.732	2.01757	-0.273966	1.7421	-0.7777	-0.128198	0.778078	0.656474	-0.53508	-0.986692	-1.26881	0.400428	-1.36947	1.70211	-1.70248	0.178682	-3.45066	4.65689			-0.196532	-0.236866	-1.68301	-0.225442	-0.200872	-1.22884	2.149	-0.027888	0.066122	-0.552734	0.61131	2.83857	3.29308	0.547806	-1.08389	0.160566	-0.360234
0.734	2.02464	-0.277816	1.73194	-0.786968	-0.107212	0.804846	0.672532	-0.55265	-1.00799	-1.2733	0.405244	-1.38083	1.68714	-1.71819	0.172928	-3.37835	4.60131			-0.179648	-0.218526	-1.67691	-0.23443	-0.19859	-1.21296	2.18502	-0.023394	0.07028	-0.552524	0.62265	2.81142	3.28782	0.543116	-1.09235	0.02758	-0.372218
0.736	2.04649	-0.288316	1.73627	-0.795172	-0.12236	0.773374	0.665532	-0.547106	-1.02334	-1.27141	0.41104	-1.33496	1.72764	-1.7103	0.181076	-3.35959	4.59934			-0.193802	-0.20034	-1.64959	-0.234822	-0.178724	-1.22497	2.1868	-0.022246	0.059038	-0.533638	0.623434	2.82957	3.29853	0.555926	-1.10984	0.003472	-0.34902
0.738	2.0634	-0.300818	1.74073	-0.80262	-0.121268	0.767648	0.670838	-0.554428	-1.03429	-1.26636	0.410928	-1.31993	1.76452	-1.69564	0.165494	-3.32577	4.58508			-0.191422	-0.192206	-1.63359	-0.233464	-0.216328	-1.22863	2.18019	-0.025928	0.059178	-0.537908	0.621992	2.84949	3.31492	0.544194	-1.10509	0.038878	-0.346388
0.74	2.06217	-0.290458	1.74615	-0.809046	-0.143976	0.776314	0.64218	-0.545636	-1.0424	-1.27161	0.415674	-1.35337	1.76798	-1.68787	0.16198	-3.36568	4.60074			-0.183414	-0.220458	-1.64714	-0.235998	-0.196602	-1.22602	2.21602	-0.017682	0.09086	-0.557816	0.61985	2.87486	3.34093	0.543186	-1.10853	0.08253	-0.36869
0.742	2.04196	-0.29197	1.73414	-0.803446	-0.147028	0.774564	0.611772	-0.566006	-1.04672	-1.29466	0.411754	-1.38362	1.7702	-1.6743	0.149884	-3.38379	4.64859			-0.21217	-0.247436	-1.6526	-0.24276	-0.203826	-1.25314	2.21841	-0.041944	0.09492	-0.582904	0.617428	2.87872	3.38295	0.539098	-1.11075	0.130438	-0.371182
0.744	2.06591	-0.278208	1.74915	-0.803978	-0.145152	0.785988	0.610736	-0.579026	-1.02129	-1.30753	0.40285	-1.43569	1.76316	-1.6973	0.171318	-3.39562	4.65954			-0.181132	-0.258454	-1.64982	-0.250082	-0.178248	-1.27023	2.2148	-0.050638	0.099414	-0.59269	0.616546	2.89428	3.39388	0.549528	-1.09274	0.088732	-0.316064
0.746	2.07424	-0.264782	1.73212	-0.804944	-0.119448	0.743316	0.588308	-0.571788	-1.01357	-1.28736	0.396522	-1.4406	1.75917	-1.72665	0.16394	-3.38468	4.70653			-0.235424	-0.23863	-1.67047	-0.24535	-0.176414	-1.27044	2.22657	-0.036512	0.0931	-0.585634	0.61257	2.89939	3.40385	0.554666	-1.09896	0.052164	-0.242928
0.748	2.08922	-0.274428	1.75526	-0.799442	-0.12005	0.763798	0.644588	-0.54138	-0.99771	-1.30116	0.397782	-1.44322	1.69302	-1.74464	0.168434	-3.32441	4.74996			-0.195496	-0.235732	-1.68041	-0.224602	-0.191436	-1.26868	2.21998	-0.034342	0.078134	-0.56525	0.612472	2.89507	3.37954	0.564998	-1.08843	0.00553	-0.19831
0.75	2.09125	-0.269346	1.77416	-0.808178	-0.124838	0.810656	0.67431	-0.550956	-1.02462	-1.29003	0.395388	-1.4372	1.73426	-1.74749	0.165746	-3.27548	4.80315			-0.151886	-0.246456	-1.70078	-0.232428	-0.209468	-1.23521	2.21234	-0.018606	0.04109	-0.540008	0.612444	2.89363	3.37572	0.563458	-1.11065	-0.065716	-0.15561
0.752	2.08718	-0.272846	1.77643	-0.81949	-0.115976	0.831698	0.685454	-0.557802	-1.05231	-1.30161	0.39858	-1.40844	1.77477	-1.74475	0.163772	-3.19656	4.76827			-0.128198	-0.25445	-1.70944	-0.21938	-0.20118	-1.23955	2.22571	-0.04515	0.056728	-0.566342	0.616658	2.87333	3.37642	0.55734	-1.11255	-0.126602	-0.200648
0.754	2.08221	-0.264208	1.76648	-0.81347	-0.144648	0.82733	0.706482	-0.576786	-1.04999	-1.30519	0.40593	-1.4014	1.76938	-1.72357	0.140028	-3.17477	4.73357			-0.146734	-0.23415	-1.7375	-0.220458	-0.175252	-1.26942	2.24524	-0.044786	0.066038	-0.575624	0.619024	2.88712	3.40761	0.55146	-1.13236	-0.134134	-0.214312
0.756	2.1015	-0.287812	1.76413	-0.817138	-0.144578	0.77854	0.716058	-0.569086	-1.05927	-1.30479	0.424746	-1.41919	1.77232	-1.715	0.152782	-3.15416	4.68192			-0.131516	-0.236964	-1.70302	-0.236194	-0.210112	-1.29009	2.2608	-0.044828	0.081844	-0.580342	0.62643	2.90091	3.44144	0.55965	-1.12189	-0.105826	-0.231882
0.758	2.09798	-0.288694	1.80268	-0.796516	-0.150934	0.756462	0.686728	-0.563542	-1.04451	-1.30185	0.424116	-1.4561	1.8044	-1.70954	0.162036	-3.16562	4.69164			-0.141386	-0.231392	-1.70208	-0.23548	-0.214634	-1.31405	2.28241	-0.028588	0.092484	-0.582414	0.631162	2.91988	3.46536	0.559566	-1.12178	-0.07945	-0.237426
0.76	2.12072	-0.291788	1.80089	-0.81165	-0.169008	0.812266	0.6699	-0.563766	-1.04024	-1.32948	0.42756	-1.49311	1.7969	-1.72522	0.176064	-3.18657	4.69935			-0.167944	-0.197316	-1.68636	-0.248486	-0.19215	-1.29948	2.28899	-0.046564	0.097412	-0.577024	0.638092	2.94633	3.50433	0.565138	-1.1052	-0.089978	-0.224462
0.762	2.12614	-0.286062	1.79761	-0.8253	-0.136528	0.818958	0.645918	-0.572642	-1.02431	-1.33519	0.439432	-1.49614	1.736	-1.74713	0.163226	-3.17832	4.73371			-0.214256	-0.245294	-1.67584	-0.261464	-0.189238	-1.29038	2.29298	-0.049714	0.094066	-0.63203	0.637196	2.91278	3.4774	0.56861	-1.12416	-0.105	-0.203294
0.764	2.11511	-0.269402	1.78891	-0.829934	-0.133462	0.84252	0.646492	-0.602882	-1.03954	-1.32213	0.435176	-1.52788	1.71755	-1.7688	0.17976	-3.167	4.77252			-0.23989	-0.251958	-1.70433	-0.259238	-0.225456	-1.25472	2.30933	-0.02954	0.06356	-0.631078	0.632828	2.90829	3.46478	0.580384	-1.13372	-0.113288	-0.138446
0.766	2.11165	-0.258902	1.78244	-0.838208	-0.097678	0.853902	0.649978	-0.581714	-1.03302	-1.32023	0.434266	-1.52198	1.7467	-1.78514	0.168014	-3.10206	4.84078			-0.217	-0.242494	-1.72393	-0.25228	-0.207298	-1.27205	2.28052	-0.049658	0.071148	-0.618198	0.633304	2.90797	3.44873	0.577528	-1.13007	-0.20244	-0.119826
0.768	2.11694	-0.287672	1.78002	-0.836486	-0.117992	0.847798	0.679518	-0.58485	-1.04698	-1.31718	0.429198	-1.49051	1.74117	-1.78794	0.171976	-3.05526	4.87201			-0.21196	-0.246162	-1.72556	-0.243544	-0.221214	-1.26591	2.29197	-0.027776	0.073472	-0.599704	0.62321	2.91081	3.4354	0.575092	-1.15121	-0.25403	-0.074648
0.77	2.13293	-0.271558	1.81769	-0.822514	-0.1309	0.83202	0.698712	-0.57498	-1.06191	-1.31582	0.414106	-1.44831	1.75854	-1.79236	0.160202	-2.99095	4.88349			-0.15211	-0.255836	-1.75939	-0.22813	-0.206136	-1.28565	2.2882	-0.041944	0.065688	-0.592102	0.616224	2.91094	3.4861	0.581994	-1.14416	-0.27748	-0.040908
0.772	2.11928	-0.290332	1.83529	-0.826686	-0.150584	0.813946	0.688184	-0.581042	-1.08128	-1.34015	0.410354	-1.49507	1.77766	-1.76243	0.169456	-2.96919	4.86419			-0.114016	-0.225554	-1.76933	-0.233044	-0.22701	-1.29728	2.2777	-0.023016	0.06062	-0.609672	0.626542	2.91393	3.5345	0.58429	-1.14236	-0.249088	-0.088396
0.774	2.13212	-0.30695	1.83877	-0.832202	-0.175112	0.833126	0.689808	-0.570514	-1.09292	-1.35489	0.413	-1.54542	1.78093	-1.75003	0.198772	-2.98767	4.75336			-0.097524	-0.233926	-1.79473	-0.241136	-0.21049	-1.29755	2.31414	-0.037898	0.057624	-0.609504	0.638176	2.92442	3.54056	0.578004	-1.11787	-0.21861	-0.123606
0.776	2.15041	-0.28504	1.8516	-0.836738	-0.146426	0.83461	0.666092	-0.587692	-1.09144	-1.34058	0.417242	-1.57692	1.77793	-1.75342	0.188314	-3.01745	4.78883			-0.164276	-0.250264	-1.77065	-0.25984	-0.212562	-1.31639	2.34654	-0.029078	0.091658	-0.615216	0.636146	2.95869	3.57217	0.57435	-1.15756	-0.224868	-0.148918
0.778	2.15247	-0.283234	1.83931	-0.842268	-0.148512	0.840602	0.672784	-0.588098	-1.06571	-1.33447	0.435274	-1.58712	1.73285	-1.76648	0.201502	-3.01809	4.79695			-0.204344	-0.254436	-1.75834	-0.255584	-0.220626	-1.29693	2.3787	-0.020398	0.100226	-0.59241	0.643832	3.00962	3.54404	0.583156	-1.14857	-0.238364	-0.127316
0.78	2.12818	-0.266672	1.86488	-0.846818	-0.152264	0.852782	0.64183	-0.56679	-1.05248	-1.34033	0.446026	-1.6052	1.69982	-1.7824	0.181286	-3.01284	4.84009			-0.22785	-0.263956	-1.74194	-0.247604	-0.229376	-1.30599	2.37845	-0.025382	0.081536	-0.645904	0.645456	2.94819	3.53377	0.593964	-1.1594	-0.253736	-0.103852
0.782	2.15226	-0.254254	1.85322	-0.850108	-0.119644	0.836136	0.655718	-0.579054	-1.0598	-1.36067	0.446502	-1.58225	1.74003	-1.81048	0.200704	-2.94409	4.88403			-0.250642	-0.252728	-1.7393	-0.241318	-0.19663	-1.29856	2.37686	-0.045892	0.046312	-0.647556	0.64813	2.95498	3.53466	0.6048	-1.16308	-0.319396	-0.072086
0.784	2.15358	-0.264922	1.84626	-0.85456	-0.10591	0.818244	0.630952	-0.584682	-1.05974	-1.34637	0.452522	-1.58368	1.75552	-1.82419	0.200732	-2.86989	4.91956			-0.268422	-0.25067	-1.75216	-0.247156	-0.225792	-1.3141	2.37954	-0.043834	0.048776	-0.644378	0.65471	2.96194	3.55663	0.608356	-1.15731	-0.361718	-0.015974
0.786	2.17687	-0.269402	1.82112	-0.86037	-0.119028	0.842912	0.620382	-0.60648	-1.07106	-1.33127	0.453964	-1.55056	1.77432	-1.82081	0.188986	-2.80122	4.95114			-0.20769	-0.26369	-1.74891	-0.247282	-0.20454	-1.32521	2.3815	-0.037506	0.04438	-0.63952	0.656278	2.95674	3.5719	0.612962	-1.15494	-0.383264	0.056854
0.788	2.17676	-0.268128	1.83252	-0.854658	-0.126238	0.821254	0.642278	-0.589274	-1.09319	-1.34215	0.456792	-1.56471	1.78752	-1.80261	0.20769	-2.78517	4.97126			-0.165676	-0.240128	-1.75497	-0.246834	-0.240758	-1.35171	2.3672	-0.02821	0.058632	-0.614754	0.651252	2.98301	3.61761	0.61075	-1.16726	-0.405692	0.069454
0.79	2.15947	-0.241094	1.8559	-0.84469	-0.166572	0.824516	0.691292	-0.572054	-1.10489	-1.36619	0.4438	-1.59473	1.79645	-1.78731	0.205996	-2.7854	4.92558			-0.13965	-0.2114	-1.78924	-0.253246	-0.251328	-1.3543	2.3606	-0.015554	0.061782	-0.633612	0.643314	3.00691	3.64847	0.606522	-1.16049	-0.411054	-0.020594
0.792	2.18961	-0.283444	1.8856	-0.852572	-0.16436	0.820498	0.694554	-0.575512	-1.10016	-1.37586	0.43925	-1.64046	1.77268	-1.7792	0.197008	-2.79384	4.90006			-0.127778	-0.230958	-1.80764	-0.241402	-0.243796	-1.31998	2.36971	-0.020748	0.07231	-0.643412	0.638134	2.99335	3.65775	0.603106	-1.1559	-0.371644	0.01841
0.794	2.19922	-0.281974	1.88829	-0.853216	-0.163226	0.807422	0.684376	-0.596582	-1.08297	-1.37635	0.434084	-1.66116	1.72959	-1.80249	0.21294	-2.80388	4.87456			-0.129206	-0.22078	-1.79861	-0.23506	-0.229642	-1.31366	2.35039	-0.023744	0.072842	-0.637588	0.639814	3.02807	3.63332	0.611464	-1.17723	-0.36533	0.013048
0.796	2.17193	-0.28294	1.89183	-0.860216	-0.153986	0.85176	0.698292	-0.600488	-1.09115	-1.35164	0.432012	-1.68185	1.7318	-1.84044	0.231308	-2.8089	4.87435			-0.165928	-0.241248	-1.82438	-0.229404	-0.214634	-1.32784	2.39716	-0.047012	0.07497	-0.626444	0.642866	2.99482	3.61399	0.622272	-1.16789	-0.385014	-0.015232
0.798	2.19671	-0.2751	1.88814	-0.859698	-0.141344	0.826532	0.680666	-0.601622	-1.08198	-1.35598	0.435652	-1.6619	1.76593	-1.85296	0.212296	-2.80918	4.93461			-0.221928	-0.243376	-1.8223	-0.237986	-0.178472	-1.34331	2.40694	-0.043218	0.068642	-0.663684	0.64645	2.99466	3.61969	0.626346	-1.1853	-0.396802	0.018886
0.8	2.19075	-0.261268	1.89206	-0.859208	-0.142786	0.808318	0.67585	-0.606326	-1.0844	-1.39178	0.448098	-1.6197	1.78529	-1.8649	0.184114	-2.7216	4.98645			-0.202538	-0.222208	-1.79442	-0.24514	-0.220458	-1.3594	2.39672	-0.019768	0.058212	-0.674324	0.646408	2.96814	3.6539	0.639268	-1.18754	-0.432726	0.09093
0.802	2.21731	-0.252336	1.92476	-0.85155	-0.123242	0.80864	0.626794	-0.578396	-1.08711	-1.38649	0.456078	-1.59561	1.80222	-1.86281	0.182406	-2.66413	4.97735			-0.186704	-0.22022	-1.78633	-0.250936	-0.24472	-1.36527	2.45014	-0.016898	0.066808	-0.683214	0.64757	2.98511	3.68861	0.645372	-1.17251	-0.471744	0.116172
0.804	2.21256	-0.265566	1.91605	-0.854938	-0.149394	0.799932	0.631232	-0.613942	-1.09252	-1.39034	0.464534	-1.62257	1.82263	-1.84864	0.198198	-2.56809	5.03563			-0.187698	-0.254814	-1.79008	-0.261674	-0.229278	-1.38484	2.48184	-0.026054	0.068656	-0.654766	0.662746	3.00516	3.70696	0.64057	-1.18138	-0.49882	0.178374
0.806	2.22279	-0.26523	1.89974	-0.86373	-0.19327	0.803894	0.617582	-0.617274	-1.10473	-1.39854	0.473368	-1.6507	1.82806	-1.83345	0.230412	-2.52314	5.03394			-0.146776	-0.239932	-1.80905	-0.265146	-0.229978	-1.38754	2.4669	-0.031332	0.082446	-0.649516	0.66948	3.02649	3.77433	0.634914	-1.18656	-0.501228	0.153804
0.808	2.24388	-0.285404	1.88474	-0.870044	-0.16779	0.829612	0.646268	-0.613746	-1.12167	-1.40049	0.47285	-1.68199	1.79292	-1.83165	0.225652	-2.54596	4.96073			-0.106694	-0.22575	-1.82567	-0.263802	-0.222628	-1.36552	2.42276	-0.045626	0.082138	-0.634214	0.668458	3.06341	3.7399	0.633206	-1.19566	-0.460922	0.097566
0.81	2.26075	-0.27811	1.89547	-0.875714	-0.185346	0.867426	0.671958	-0.598038	-1.11241	-1.40785	0.47607	-1.68984	1.74593	-1.83085	0.198114	-2.56829	4.92936			-0.117656	-0.257446	-1.8487	-0.249774	-0.248836	-1.37589	2.42442	-0.032158	0.101136	-0.645904	0.669774	3.0877	3.71195	0.621502	-1.19315	-0.431564	0.153132
0.812	2.22292	-0.276738	1.91457	-0.868854	-0.167482	0.902958	0.68327	-0.586922	-1.14009	-1.41742	0.473466	-1.7053	1.77178	-1.84887	0.198576	-2.56173	4.91667			-0.134624	-0.231798	-1.86759	-0.248388	-0.255402	-1.34443	2.43249	-0.041202	0.098182	-0.664426	0.669172	3.06149	3.70853	0.6356	-1.20315	-0.46977	0.117222
0.814	2.22398	-0.270634	1.94082	-0.863562	-0.160286	0.88277	0.701988	-0.595896	-1.12605	-1.41175	0.464562	-1.68872	1.80673	-1.87099	0.18788	-2.54619	4.94782			-0.138992	-0.246764	-1.85746	-0.236978	-0.214956	-1.32371	2.45193	-0.054866	0.099946	-0.661472	0.66122	3.02182	3.73561	0.646002	-1.21318	-0.494718	0.089782
0.816	2.24048	-0.272216	1.95412	-0.87227	-0.131278	0.83797	0.678986	-0.633304	-1.11098	-1.40287	0.455882	-1.69338	1.82959	-1.89591	0.203546	-2.52787	4.9868			-0.161294	-0.277634	-1.88024	-0.246162	-0.21336	-1.40069	2.47633	-0.05138	0.091826	-0.636524	0.655424	3.02116	3.75652	0.657916	-1.20116	-0.509138	0.138502
0.818	2.25432	-0.260694	1.9245	-0.871234	-0.143038	0.802522	0.664538	-0.622132	-1.11583	-1.43536	0.461552	-1.65773	1.81826	-1.90242	0.20587	-2.44441	5.04001			-0.1358	-0.26187	-1.86505	-0.246022	-0.213444	-1.40847	2.4829	-0.052514	0.07413	-0.666904	0.659274	3.0479	3.7968	0.654332	-1.20319	-0.54117	0.22582
0.82	2.28018	-0.261982	1.96952	-0.871374	-0.14994	0.835814	0.667744	-0.618072	-1.10697	-1.42997	0.449092	-1.66061	1.83295	-1.90365	0.20307	-2.39872	5.05211			-0.142758	-0.254156	-1.83592	-0.245	-0.222852	-1.39269	2.50788	-0.036218	0.079394	-0.687442	0.66178	3.07367	3.8066	0.663936	-1.19343	-0.577234	0.277802
0.822	2.28364	-0.27216	1.95866	-0.871976	-0.171486	0.842016	0.649194	-0.621152	-1.13053	-1.43252	0.452144	-1.7268	1.83254	-1.88311	0.187866	-2.33204	5.03395			-0.118062	-0.26698	-1.82987	-0.241486	-0.232036	-1.39514	2.51671	-0.034076	0.078722	-0.689248	0.659232	3.0795	3.81839	0.671062	-1.18962	-0.593852	0.220234
0.824	2.26926	-0.249634	1.98223	-0.8743	-0.1729	0.854644	0.598304	-0.617568	-1.14785	-1.48403	0.458864	-1.73236	1.80615	-1.87914	0.200788	-2.32648	4.95173			-0.112602	-0.239218	-1.80443	-0.243404	-0.241752	-1.37896	2.55179	-0.01071	0.071862	-0.662872	0.654332	3.10698	3.80213	0.659008	-1.21667	-0.565502	0.230734
0.826	2.25333	-0.273812	1.9349	-0.88249	-0.156576	0.871402	0.62076	-0.626374	-1.15623	-1.4699	0.48412	-1.78616	1.79175	-1.86585	0.214802	-2.31804	4.97935			-0.09912	-0.243306	-1.81579	-0.251384	-0.25522	-1.41225	2.53723	-0.035672	0.07448	-0.638568	0.668346	3.11819	3.75432	0.649278	-1.19925	-0.547316	0.221144
0.828	2.27051	-0.277144	1.92734	-0.886592	-0.155582	0.863016	0.611618	-0.630518	-1.13495	-1.47097	0.488544	-1.76599	1.81594	-1.86824	0.187516	-2.34744	4.98347			-0.061642	-0.250796	-1.86199	-0.262934	-0.234402	-1.41546	2.51737	-0.035658	0.099722	-0.640808	0.67347	3.10299	3.77269	0.646394	-1.23697	-0.551446	0.207102
0.83	2.24007	-0.295652	1.95168	-0.890666	-0.155204	0.843192	0.651406	-0.618338	-1.15468	-1.4726	0.489174	-1.76775	1.81268	-1.88409	0.173474	-2.37481	5.0478			-0.060928	-0.239218	-1.87972	-0.261548	-0.227374	-1.42295	2.54576	-0.031178	0.12243	-0.630812	0.681688	3.10458	3.78757	0.661136	-1.24634	-0.564956	0.185738
0.832	2.28421	-0.265482	1.95527	-0.887138	-0.13888	0.846426	0.672168	-0.615286	-1.13834	-1.47732	0.489804	-1.7184	1.81348	-1.9115	0.183708	-2.34207	5.06941			-0.098728	-0.247702	-1.86346	-0.252924	-0.20251	-1.43647	2.5164	-0.041468	0.105798	-0.642894	0.68565	3.06722	3.82011	0.681618	-1.22893	-0.562464	0.196434
0.834	2.28581	-0.275688	1.98565	-0.880572	-0.145348	0.835912	0.674296	-0.593698	-1.12977	-1.45044	0.48909	-1.72024	1.86299	-1.92543	0.199416	-2.2755	5.07809			-0.110838	-0.243614	-1.90851	-0.2548	-0.22456	-1.4055	2.51833	-0.063294	0.11501	-0.664902	0.677866	3.0926	3.87505	0.686714	-1.20662	-0.589652	0.28518
0.836	2.30451	-0.29022	1.98895	-0.872564	-0.159236	0.836556	0.656292	-0.641032	-1.14338	-1.45974	0.485912	-1.73722	1.84734	-1.93841	0.19355	-2.20241	5.11346			-0.103334	-0.283192	-1.91548	-0.26327	-0.235214	-1.42335	2.54568	-0.046074	0.074074	-0.6804	0.677768	3.10678	3.90443	0.67879	-1.23019	-0.615356	0.33852
0.838	2.29334	-0.298466	1.99129	-0.88312	-0.150892	0.832034	0.653268	-0.647458	-1.14412	-1.48355	0.479346	-1.75475	1.84776	-1.93326	0.200536	-2.11653	5.08935			-0.083902	-0.273784	-1.90085	-0.257054	-0.22498	-1.43965	2.58579	-0.04921	0.09296	-0.691908	0.675332	3.12701	3.93357	0.689388	-1.2439	-0.638932	0.365218
0.84	2.33167	-0.290836	2.00903	-0.886844	-0.148778	0.843458	0.658616	-0.624652	-1.16068	-1.46986	0.473704	-1.83067	1.82788	-1.90588	0.186284	-2.07467	5.04764			-0.072114	-0.23044	-1.85205	-0.252476	-0.257684	-1.4356	2.59448	-0.0658	0.089712	-0.675528	0.673036	3.13909	3.87969	0.679602	-1.23736	-0.64281	0.366632
0.842	2.34822	-0.301882	2.01585	-0.89733	-0.175728	0.847042	0.629958	-0.641312	-1.17666	-1.48201	0.470792	-1.8423	1.8002	-1.90343	0.163982	-2.12552	5.00352			-0.083328	-0.227402	-1.8823	-0.254142	-0.23793	-1.40484	2.59532	-0.031332	0.100828	-0.662942	0.66465	3.14528	3.86917	0.679322	-1.25819	-0.587328	0.363216
0.844	2.3281	-0.300916	1.98223	-0.891072	-0.15449	0.846552	0.629412	-0.629342	-1.17639	-1.49248	0.462952	-1.85042	1.83823	-1.91087	0.159586	-2.13569	5.02069			-0.061432	-0.249998	-1.85825	-0.255458	-0.277606	-1.43401	2.59833	-0.009324	0.100296	-0.649782	0.669634	3.13629	3.92913	0.670754	-1.25873	-0.579278	0.335398
0.846	2.33078	-0.308434	2.00428	-0.883638	-0.160034	0.8659	0.63602	-0.66094	-1.17942	-1.50405	0.479584	-1.84243	1.83345	-1.92513	0.179592	-2.1488	5.05254			-0.087276	-0.278922	-1.87726	-0.266924	-0.261646	-1.4663	2.62665	-0.02492	0.105588	-0.662214	0.666526	3.12056	3.88776	0.680708	-1.24039	-0.586698	0.31171
0.848	2.31137	-0.28497	1.99378	-0.890582	-0.17409	0.8498	0.628138	-0.647654	-1.17947	-1.50431	0.483028	-1.85623	1.85499	-1.94891	0.195062	-2.12454	5.08733			-0.102886	-0.257922	-1.89437	-0.283304	-0.206262	-1.4863	2.62863	-0.049364	0.118594	-0.645148	0.675164	3.12011	3.93764	0.69552	-1.23035	-0.602546	0.307034
0.85	2.32506	-0.298578	2.00459	-0.891954	-0.155078	0.868028	0.650636	-0.636286	-1.16389	-1.4972	0.500878	-1.79925	1.86158	-1.9738	0.194894	-2.09703	5.11361			-0.119252	-0.275478	-1.9319	-0.288008	-0.229236	-1.49359	2.6445	-0.022232	0.117488	-0.647598	0.687512	3.12432	3.94911	0.700406	-1.23988	-0.616644	0.381066
0.852	2.33939	-0.284522	2.04082	-0.900032	-0.16457	0.806554	0.636538	-0.623014	-1.17256	-1.48868	0.49931	-1.77958	1.83942	-1.97798	0.167412	-2.00148	5.13517			-0.155218	-0.238994	-1.91919	-0.276052	-0.222796	-1.44936	2.6362	-0.041664	0.122318	-0.661164	0.686294	3.14401	3.99591	0.714672	-1.25856	-0.648172	0.473144
0.854	2.34914	-0.30765	2.04466	-0.904792	-0.144676	0.841862	0.653072	-0.61873	-1.16155	-1.49421	0.499478	-1.82874	1.83585	-1.97562	0.183694	-1.90498	5.11735			-0.09744	-0.287546	-1.93222	-0.285894	-0.25039	-1.45131	2.64363	-0.045094	0.115192	-0.664454	0.688996	3.13781	3.98835	0.709674	-1.27445	-0.649866	0.527562
0.856	2.34496	-0.31052	2.06282	-0.894866	-0.1834	0.845782	0.655774	-0.637784	-1.17408	-1.49682	0.506254	-1.87984	1.78667	-1.9502	0.18249	-1.83996	5.11067			-0.060788	-0.254506	-1.94289	-0.27272	-0.257894	-1.46265	2.61475	-0.064442	0.085778	-0.685384	0.688086	3.15696	3.95457	0.701876	-1.26571	-0.668528	0.469728
0.858	2.35277	-0.30142	2.07178	-0.90804	-0.154252	0.880544	0.643538	-0.661206	-1.18019	-1.50037	0.504182	-1.90691	1.79659	-1.93943	0.16618	-1.83124	5.07062			-0.06433	-0.251034	-1.9152	-0.261128	-0.242046	-1.44446	2.64803	-0.054782	0.085722	-0.693168	0.692426	3.18961	3.95627	0.700728	-1.25839	-0.666974	0.485436
0.86	2.34499	-0.267302	2.08583	-0.911554	-0.152558	0.854	0.639156	-0.651476	-1.20767	-1.51367	0.503664	-1.93803	1.84292	-1.94494	0.179046	-1.88208	5.01609			-0.05572	-0.21385	-1.87377	-0.258874	-0.257264	-1.47203	2.69112	-0.060214	0.094682	-0.676396	0.683508	3.16726	3.94435	0.708078	-1.25325	-0.628278	0.486584
0.862	2.39938	-0.303058	2.08579	-0.90706	-0.166852	0.827022	0.648984	-0.65464	-1.20873	-1.51854	0.49525	-1.90029	1.84692	-1.95752	0.178234	-1.87753	5.0885			-0.085918	-0.241038	-1.87442	-0.260694	-0.250488	-1.47734	2.72156	-0.048972	0.094304	-0.681856	0.679714	3.1578	3.96229	0.712642	-1.26228	-0.634522	0.443394
0.864	2.40815	-0.297864	2.07385	-0.898688	-0.161224	0.813736	0.623112	-0.664832	-1.20459	-1.51908	0.489048	-1.92951	1.83107	-1.98932	0.19831	-1.88182	5.14361			-0.137858	-0.239148	-1.88062	-0.274358	-0.21966	-1.50151	2.69892	-0.032942	0.120722	-0.663768	0.670642	3.14191	4.00484	0.724136	-1.26347	-0.626038	0.471534
0.866	2.41209	-0.29638	2.07679	-0.907242	-0.167272	0.824362	0.60214	-0.654654	-1.20142	-1.52246	0.491302	-1.8997	1.82157	-2.0019	0.196014	-1.8592	5.16426			-0.181846	-0.264936	-1.90375	-0.280126	-0.211022	-1.53381	2.69671	-0.034146	0.129934	-0.672504	0.675374	3.13984	4.08017	0.73542	-1.26382	-0.642572	0.484316
0.868	2.39263	-0.299922	2.05241	-0.917602	-0.14987	0.808682	0.620998	-0.66745	-1.19228	-1.50984	0.485142	-1.88422	1.82217	-2.01041	0.179354	-1.81495	5.1728			-0.14763	-0.280434	-1.93236	-0.28427	-0.241808	-1.4988	2.73252	-0.02611	0.134218	-0.677684	0.684516	3.16464	4.08076	0.735826	-1.29	-0.634368	0.58485
0.87	2.38876	-0.304094	2.07082	-0.931658	-0.153076	0.824684	0.599844	-0.647794	-1.18005	-1.52223	0.491806	-1.90774	1.82069	-2.01246	0.192416	-1.74635	5.16897			-0.128856	-0.270676	-1.93085	-0.29169	-0.230734	-1.49272	2.72521	-0.02268	0.123676	-0.67858	0.694988	3.17768	4.08318	0.744072	-1.293	-0.67102	0.61523
0.872	2.37601	-0.30961	2.09651	-0.927024	-0.150654	0.84868	0.627172	-0.662298	-1.185	-1.53224	0.49273	-1.94197	1.7883	-1.99819	0.152642	-1.65878	5.15444			-0.10178	-0.269612	-1.94352	-0.291158	-0.25053	-1.51143	2.73091	-0.043246	0.102648	-0.699328	0.689934	3.19183	4.05304	0.733544	-1.29959	-0.701092	0.584598
0.874	2.39914	-0.309792	2.09927	-0.946596	-0.17304	0.915418	0.63763	-0.656502	-1.18888	-1.5423	0.50764	-1.98304	1.78219	-1.9819	0.171122	-1.62429	5.10234			-0.062832	-0.268058	-1.93551	-0.287	-0.255542	-1.4573	2.73358	-0.07091	0.1134	-0.733362	0.686392	3.20319	4.03567	0.726978	-1.30592	-0.699524	0.580734
0.876	2.38624	-0.29246	2.11154	-0.93751	-0.185486	0.897512	0.64841	-0.646884	-1.19582	-1.52841	0.51856	-2.00067	1.81663	-1.97236	0.179354	-1.63989	5.05369			-0.038402	-0.260092	-1.95406	-0.284606	-0.23541	-1.46551	2.7057	-0.05796	0.09933	-0.73241	0.68901	3.21233	4.03799	0.729484	-1.29777	-0.660898	0.579474
0.878	2.40957	-0.282856	2.13427	-0.929824	-0.160342	0.863408	0.65163	-0.662732	-1.21408	-1.55116	0.516446	-2.01426	1.81829	-1.97981	0.194418	-1.65827	5.11955			-0.047698	-0.261912	-1.92798	-0.2807	-0.244944	-1.50923	2.71804	-0.063742	0.107674	-0.711508	0.698152	3.17674	4.05521	0.741776	-1.27812	-0.64029	0.505526
0.88	2.43958	-0.295456	2.12694	-0.93072	-0.155722	0.834582	0.655186	-0.660828	-1.20751	-1.54377	0.522452	-1.97707	1.82672	-2.00621	0.18858	-1.66639	5.16676			-0.11277	-0.238658	-1.91426	-0.288624	-0.246918	-1.51668	2.73634	-0.074522	0.119532	-0.709394	0.704312	3.14835	4.08478	0.743512	-1.29795	-0.669648	0.55769
0.882	2.4275	-0.327068	2.13238	-0.930888	-0.146174	0.832706	0.648032	-0.67144	-1.22832	-1.54811	0.521808	-1.94634	1.82097	-2.02475	0.190498	-1.66582	5.19334			-0.154028	-0.254772	-1.90914	-0.288372	-0.21371	-1.53412	2.77183	-0.056868	0.105014	-0.70287	0.697368	3.12924	4.11505	0.750946	-1.29588	-0.668486	0.600068
0.884	2.42603	-0.294854	2.14771	-0.92722	-0.157528	0.849618	0.649894	-0.673764	-1.21155	-1.55085	0.514934	-1.93799	1.81264	-2.04056	0.196784	-1.61755	5.22134			-0.192822	-0.243992	-1.88175	-0.276444	-0.221144	-1.52172	2.77911	-0.015876	0.143108	-0.7035	0.69328	3.16414	4.15632	0.752864	-1.30896	-0.68068	0.653842
0.886	2.43583	-0.292012	2.13284	-0.941444	-0.156786	0.877422	0.632772	-0.675682	-1.21943	-1.55288	0.517384	-1.96223	1.80621	-2.05113	0.18354	-1.55765	5.22473			-0.163912	-0.28224	-1.93032	-0.283178	-0.239456	-1.49915	2.77773	-0.009828	0.126182	-0.714448	0.687078	3.14436	4.16755	0.756882	-1.30651	-0.682248	0.757932
0.888	2.42217	-0.308028	2.12467	-0.952756	-0.152054	0.885822	0.609196	-0.660828	-1.20597	-1.55162	0.509054	-2.02341	1.76012	-2.04483	0.169946	-1.46964	5.20164			-0.086562	-0.27916	-1.9656	-0.300524	-0.259126	-1.51126	2.80479	-0.002814	0.14763	-0.73346	0.686896	3.19703	4.14246	0.767466	-1.33581	-0.706734	0.750442
0.89	2.41634	-0.308434	2.12433	-0.955052	-0.155092	0.859796	0.606648	-0.688016	-1.20939	-1.54468	0.499198	-2.06017	1.78051	-2.02182	0.161742	-1.38974	5.19212			-0.036288	-0.259602	-1.94503	-0.302372	-0.238098	-1.52803	2.80333	-0.03276	0.12509	-0.685636	0.68845	3.22007	4.11841	0.755118	-1.31894	-0.723968	0.737044
0.892	2.42375	-0.293356	2.15419	-0.952868	-0.146314	0.867678	0.607082	-0.695268	-1.2119	-1.5419	0.49875	-2.06335	1.79453	-2.01856	0.175252	-1.3579	5.13596			-0.01883	-0.257278	-1.98877	-0.298732	-0.253106	-1.52894	2.79731	-0.040866	0.111692	-0.718494	0.690606	3.2087	4.13878	0.761068	-1.30446	-0.702632	0.711942
0.894	2.46165	-0.311024	2.19197	-0.952448	-0.164094	0.866656	0.630336	-0.664566	-1.24286	-1.55809	0.506338	-2.07344	1.80807	-2.0032	0.17311	-1.38223	5.15662			-0.033866	-0.283654	-1.97859	-0.29967	-0.259448	-1.52447	2.78676	-0.040964	0.085806	-0.749168	0.692636	3.19136	4.14256	0.749644	-1.31495	-0.675528	0.683844
0.896	2.46984	-0.31871	2.20277	-0.951454	-0.169722	0.8316	0.66983	-0.658714	-1.25818	-1.56758	0.520282	-2.05608	1.79879	-2.01263	0.210168	-1.41175	5.2045			-0.055776	-0.271222	-1.96624	-0.295652	-0.263718	-1.53303	2.78727	-0.082446	0.090678	-0.737492	0.700672	3.18109	4.19779	0.75852	-1.32723	-0.672042	0.679756
0.898	2.45596	-0.32648	2.2153	-0.952056	-0.171318	0.867986	0.709142	-0.677726	-1.26197	-1.57861	0.522746	-2.02062	1.78457	-2.04016	0.18599	-1.41946	5.20605			-0.113176	-0.274428	-1.96209	-0.305704	-0.242732	-1.54753	2.77906	-0.062188	0.09835	-0.719782	0.700672	3.19063	4.23294	0.766612	-1.32986	-0.695142	0.70735
0.9	2.45939	-0.31885	2.22568	-0.954114	-0.138446	0.854406	0.6916	-0.68551	-1.26078	-1.59012	0.538678	-1.99116	1.76924	-2.06527	0.191044	-1.42611	5.21926			-0.139258	-0.239862	-1.93347	-0.30436	-0.200704	-1.55746	2.76006	-0.059416	0.079184	-0.707336	0.712726	3.21945	4.22633	0.770182	-1.31838	-0.704298	0.751534
0.902	2.48349	-0.315224	2.21215	-0.952392	-0.147938	0.863198	0.70056	-0.697396	-1.27673	-1.58311	0.544404	-2.05215	1.74633	-2.0838	0.186046	-1.33508	5.24661			-0.161812	-0.25935	-1.93451	-0.29274	-0.239232	-1.53349	2.80164	-0.017514	0.088004	-0.69937	0.709142	3.24117	4.2005	0.77511	-1.33903	-0.713426	0.851858
0.904	2.46476	-0.298956	2.20756	-0.9632	-0.167398	0.858606	0.714028	-0.67389	-1.27683	-1.58628	0.544866	-2.08146	1.73341	-2.07063	0.167132	-1.25005	5.26403			-0.156786	-0.270914	-1.90963	-0.272972	-0.251818	-1.5272	2.81644	-0.000686	0.107408	-0.73255	0.710262	3.2681	4.18543	0.782796	-1.33839	-0.703136	0.87969
0.906	2.48006	-0.285992	2.20137	-0.958118	-0.158424	0.846286	0.677334	-0.684068	-1.25469	-1.57753	0.550046	-2.09854	1.76288	-2.05523	0.16121	-1.18177	5.22676			-0.101766	-0.298606	-1.95829	-0.263368	-0.2471	-1.56024	2.83198	0.004466	0.120904	-0.754544	0.711368	3.26829	4.20398	0.778652	-1.35869	-0.689696	0.86541
0.908	2.50366	-0.309974	2.18889	-0.958678	-0.173194	0.839034	0.63882	-0.675878	-1.25453	-1.58339	0.54012	-2.16223	1.7891	-2.04228	0.203994	-1.09833	5.19123			-0.015652	-0.294546	-1.99298	-0.287602	-0.258342	-1.59439	2.85662	-0.02632	0.118328	-0.744128	0.701302	3.24552	4.19482	0.77294	-1.33042	-0.679784	0.842366
0.91	2.51861	-0.305886	2.21697	-0.96026	-0.164948	0.855022	0.605108	-0.683928	-1.23617	-1.58358	0.536312	-2.14801	1.774	-2.0298	0.213542	-1.15671	5.18382			-0.037772	-0.272272	-1.98934	-0.312578	-0.240296	-1.59396	2.8777	-0.047306	0.104902	-0.758646	0.702128	3.23862	4.22625	0.771722	-1.33902	-0.649068	0.848316
0.912	2.50666	-0.29351	2.22566	-0.963158	-0.149506	0.823998	0.598542	-0.711522	-1.26335	-1.59173	0.523838	-2.10657	1.77353	-2.05096	0.214214	-1.16231	5.21871			-0.04564	-0.26075	-1.98136	-0.322294	-0.275534	-1.5857	2.86451	-0.053956	0.08876	-0.750484	0.69258	3.22333	4.27183	0.77287	-1.34203	-0.638358	0.809172
0.914	2.48384	-0.278208	2.23118	-0.971502	-0.163114	0.791462	0.626108	-0.685356	-1.26917	-1.59396	0.52185	-2.09289	1.76961	-2.06676	0.198646	-1.19379	5.24187			-0.055412	-0.234934	-2.01048	-0.320054	-0.253092	-1.57511	2.85261	-0.072814	0.076762	-0.766262	0.695576	3.23674	4.3051	0.781186	-1.38634	-0.652876	0.823914
0.916	2.52776	-0.305326	2.23471	-0.964572	-0.146104	0.821884	0.659204	-0.698558	-1.29592	-1.60336	0.516124	-2.09047	1.74	-2.09384	0.210014	-1.19259	5.24763			-0.091238	-0.239582	-2.00819	-0.3031	-0.248416	-1.56754	2.84416	-0.063168	0.08988	-0.75502	0.70728	3.25591	4.32625	0.79023	-1.36591	-0.67158	0.848918
0.918	2.50509	-0.321398	2.26054	-0.970382	-0.15946	0.860622	0.676942	-0.68572	-1.3029	-1.59709	0.51884	-2.11296	1.76299	-2.11593	0.176372	-1.11329	5.24559			-0.053774	-0.276122	-1.96307	-0.29827	-0.229936	-1.56709	2.85897	-0.041314	0.081914	-0.749406	0.706608	3.25585	4.30276	0.797286	-1.34845	-0.657776	0.929894
0.92	2.5464	-0.30786	2.26857	-0.978866	-0.159614	0.875588	0.679504	-0.696052	-1.31015	-1.59418	0.532994	-2.16023	1.71482	-2.11523	0.187992	-1.05223	5.26743			-0.041006	-0.275002	-1.96965	-0.299236	-0.246806	-1.57643	2.86677	-0.028448	0.111888	-0.7637	0.716492	3.26162	4.26884	0.791966	-1.36006	-0.666778	0.979258
0.922	2.55195	-0.29925	2.25756	-0.970312	-0.154238	0.846006	0.68173	-0.691012	-1.28401	-1.60755	0.54754	-2.19575	1.73191	-2.10526	0.184128	-0.9471	5.27033			-0.062048	-0.269668	-1.96384	-0.307748	-0.242494	-1.58915	2.90241	-0.022876	0.115626	-0.763672	0.708596	3.31587	4.27125	0.789446	-1.37778	-0.6573	0.974792
0.924	2.53974	-0.303702	2.26533	-0.98259	-0.175924	0.84469	0.694946	-0.679896	-1.30192	-1.63647	0.55909	-2.20479	1.75769	-2.0966	0.181888	-0.880026	5.21857			-0.083846	-0.264754	-1.97834	-0.305858	-0.250922	-1.60031	2.92061	-0.010654	0.107128	-0.758716	0.728924	3.27786	4.2694	0.794108	-1.36317	-0.644616	0.950656
0.926	2.51796	-0.303576	2.24798	-0.973084	-0.17129	0.838978	0.697354	-0.684642	-1.28401	-1.64251	0.561274	-2.20339	1.74474	-2.0739	0.218512	-0.87318	5.15434			-0.02898	-0.271796	-1.99608	-0.297822	-0.25949	-1.62008	2.94356	-0.007252	0.117628	-0.768432	0.72863	3.26445	4.29013	0.799106	-1.34613	-0.639002	0.895244
0.928	2.55129	-0.299152	2.23906	-0.974988	-0.165018	0.848904	0.648536	-0.690578	-1.28744	-1.62931	0.565292	-2.18896	1.74657	-2.08617	0.199878	-0.912772	5.21486			0.002086	-0.293356	-1.99619	-0.296212	-0.28245	-1.64087	2.9349	-0.046354	0.088704	-0.763672	0.722386	3.26347	4.35022	0.783888	-1.36779	-0.615664	0.9058
0.93	2.55084	-0.313208	2.27375	-0.978152	-0.156604	0.821296	0.618548	-0.710514	-1.29325	-1.62768	0.563416	-2.15589	1.74275	-2.10029	0.207732	-0.922362	5.24307			0.001666	-0.294462	-2.02205	-0.300398	-0.26817	-1.62921	2.92078	-0.072506	0.074732	-0.777266	0.719222	3.26078	4.3651	0.790734	-1.39278	-0.61936	0.897918
0.932	2.51735	-0.307972	2.29317	-0.9863	-0.148386	0.827624	0.580132	-0.682626	-1.3047	-1.61137	0.56175	-2.14213	1.71454	-2.11884	0.204316	-0.930202	5.24818			-0.00693	-0.26733	-2.02103	-0.312242	-0.271334	-1.65551	2.91054	-0.066864	0.088074	-0.788172	0.717094	3.28493	4.40159	0.798364	-1.37901	-0.640192	0.964726
0.934	2.52563	-0.292376	2.30126	-0.99351	-0.16758	0.795816	0.60088	-0.707	-1.30077	-1.61916	0.554764	-2.18847	1.7016	-2.1316	0.176708	-0.923902	5.27159			-0.052346	-0.250026	-2.02121	-0.318906	-0.253582	-1.62186	2.92998	-0.036162	0.089586	-0.761194	0.714616	3.30775	4.37749	0.814058	-1.38988	-0.672392	0.996954
0.936	2.53816	-0.320502	2.2933	-0.992894	-0.185472	0.830676	0.64575	-0.68453	-1.29381	-1.62781	0.559916	-2.2489	1.68855	-2.14694	0.185808	-0.86016	5.2717			-0.040432	-0.257796	-1.99534	-0.316974	-0.250068	-1.60719	2.937	-0.027678	0.123046	-0.77714	0.71491	3.31097	4.33182	0.824082	-1.40067	-0.645148	1.05024
0.938	2.5613	-0.315686	2.30992	-0.9891	-0.180166	0.875812	0.683788	-0.695226	-1.28577	-1.63787	0.543438	-2.28288	1.70034	-2.13584	0.175014	-0.758366	5.26179			-0.02373	-0.258846	-1.97323	-0.310842	-0.265608	-1.62436	2.92536	-0.037814	0.127666	-0.76986	0.718662	3.31318	4.34834	0.821268	-1.39156	-0.640528	1.15888
0.94	2.58881	-0.30429	2.32364	-0.98854	-0.161882	0.844382	0.680862	-0.705376	-1.28738	-1.65704	0.536256	-2.29282	1.70419	-2.11368	0.216972	-0.67487	5.28343			-0.013188	-0.293342	-1.97569	-0.323232	-0.258062	-1.6178	2.92982	-0.013748	0.129402	-0.742602	0.721812	3.28724	4.35156	0.806792	-1.36576	-0.636426	1.13807
0.942	2.60544	-0.31521	2.3239	-0.987406	-0.17535	0.837774	0.68712	-0.698474	-1.28842	-1.66753	0.54418	-2.27693	1.70009	-2.11086	0.208964	-0.603386	5.26091			-0.006566	-0.291886	-1.96717	-0.325276	-0.27461	-1.64577	2.96157	-0.036064	0.133966	-0.762272	0.715764	3.28524	4.36934	0.80416	-1.3721	-0.628012	1.0466
0.944	2.61481	-0.299852	2.32085	-0.99477	-0.143668	0.82838	0.69076	-0.71064	-1.27779	-1.66929	0.551586	-2.23503	1.7031	-2.11179	0.20545	-0.653044	5.19315			-0.007238	-0.275072	-1.97204	-0.313096	-0.256186	-1.65792	2.98502	-0.03486	0.11473	-0.744814	0.723436	3.28215	4.43846	0.806974	-1.40102	-0.600782	1.05959
0.946	2.58257	-0.290164	2.31762	-0.995554	-0.175924	0.848274	0.683144	-0.695674	-1.29077	-1.65106	0.567504	-2.20461	1.68731	-2.13326	0.20601	-0.658182	5.21213			-0.00259	-0.307944	-2.00796	-0.302232	-0.261352	-1.67278	3.00348	-0.03003	0.109368	-0.73395	0.72541	3.29473	4.46604	0.816214	-1.39537	-0.602476	1.04922
0.948	2.59588	-0.314972	2.32947	-1.00447	-0.183456	0.829052	0.667128	-0.712124	-1.30785	-1.66852	0.573314	-2.24921	1.69323	-2.15384	0.20874	-0.714994	5.24908			0.030912	-0.284774	-2.01977	-0.299698	-0.26229	-1.69522	3.00048	-0.04018	0.09744	-0.76223	0.74004	3.31349	4.49046	0.828716	-1.41376	-0.591234	1.05837
0.95	2.5976	-0.303002	2.34751	-1.0064	-0.151312	0.795802	0.625086	-0.715792	-1.32839	-1.67609	0.591808	-2.27185	1.68868	-2.17358	0.214592	-0.705124	5.24306			0.03703	-0.273546	-2.0432	-0.313516	-0.25228	-1.68836	3.01853	-0.06734	0.099344	-0.799428	0.742252	3.33299	4.47567	0.835142	-1.39541	-0.631722	1.0835
0.952	2.61083	-0.319242	2.35725	-1.00523	-0.164962	0.85554	0.61824	-0.724444	-1.33059	-1.67395	0.583856	-2.31893	1.67856	-2.17658	0.220164	-0.655816	5.25279			0.014252	-0.26593	-2.04348	-0.330428	-0.250782	-1.69557	3.01962	-0.03724	0.11403	-0.781242	0.742308	3.36357	4.44443	0.83573	-1.38911	-0.621936	1.12468
0.954	2.6054	-0.317226	2.34499	-1.01713	-0.171024	0.864206	0.603064	-0.727216	-1.32363	-1.6693	0.590548	-2.34046	1.67761	-2.16268	0.18543	-0.567742	5.26509			-0.00042	-0.287952	-2.03928	-0.341614	-0.248612	-1.65493	2.99386	-0.058506	0.138488	-0.796082	0.740026	3.35868	4.43149	0.838054	-1.3901	-0.600936	1.20901
0.956	2.61705	-0.316638	2.35568	-1.00283	-0.183652	0.872424	0.632744	-0.711662	-1.34191	-1.70016	0.581406	-2.33247	1.69044	-2.14603	0.18263	-0.483028	5.26985			0.013636	-0.267764	-2.02601	-0.342734	-0.260386	-1.64697	3.01497	-0.044394	0.11396	-0.772492	0.73899	3.3423	4.44562	0.838334	-1.40566	-0.583226	1.2622
0.958	2.59806	-0.3346	2.36601	-1.01188	-0.189518	0.861252	0.671972	-0.707238	-1.32783	-1.71196	0.573818	-2.31043	1.68234	-2.13576	0.211176	-0.400862	5.27339			0.043274	-0.282786	-2.0006	-0.344064	-0.274148	-1.66361	2.98925	-0.045682	0.117698	-0.763728	0.734412	3.3152	4.45112	0.818496	-1.41268	-0.582778	1.19903
0.96	2.62455	-0.323022	2.36741	-1.00789	-0.168812	0.812154	0.70049	-0.715582	-1.31596	-1.69779	0.564522	-2.29251	1.69631	-2.14879	0.222712	-0.40635	5.21798			0.041734	-0.277396	-2.0116	-0.337806	-0.288568	-1.7017	3.00203	-0.03311	0.112644	-0.744576	0.722638	3.27762	4.50626	0.821226	-1.4194	-0.589036	1.17475
0.962	2.65356	-0.325136	2.3731	-1.00701	-0.170856	0.797902	0.675192	-0.717248	-1.29417	-1.72437	0.56322	-2.26391	1.68643	-2.15989	0.222992	-0.445886	5.20993			0.03969	-0.260946	-2.02518	-0.341964	-0.268506	-1.72241	3.02037	-0.030016	0.099722	-0.761684	0.73556	3.32489	4.53233	0.825552	-1.43329	-0.552636	1.17946
0.964	2.6283	-0.343084	2.37098	-1.01692	-0.177492	0.84784	0.681072	-0.721028	-1.31972	-1.73687	0.555072	-2.28075	1.68776	-2.18749	0.23163	-0.452186	5.24262			0.036554	-0.273252	-1.99738	-0.329812	-0.259112	-1.71916	3.05388	-0.04886	0.102466	-0.762202	0.736764	3.33325	4.53632	0.835898	-1.44312	-0.531384	1.19255
0.966	2.64849	-0.339962	2.35983	-1.00474	-0.1729	0.900634	0.698236	-0.706538	-1.33476	-1.70463	0.559272	-2.32694	1.66226	-2.19086	0.192178	-0.456092	5.28195			0.01988	-0.268632	-2.03623	-0.326494	-0.29029	-1.68757	3.06039	-0.04011	0.119602	-0.778708	0.729554	3.33827	4.5351	0.85694	-1.43031	-0.560336	1.1789
0.968	2.61831	-0.346626	2.38132	-1.00383	-0.154896	0.905968	0.67431	-0.714602	-1.36286	-1.72396	0.576072	-2.36894	1.64032	-2.20405	0.200018	-0.417914	5.27234			0.029414	-0.287434	-2.03767	-0.31878	-0.28119	-1.69856	3.05441	-0.0406	0.07763	-0.804006	0.74046	3.35726	4.50016	0.858298	-1.43055	-0.585452	1.26266
0.97	2.64603	-0.332514	2.36375	-1.00215	-0.153594	0.896378	0.62223	-0.715806	-1.377	-1.69831	0.585802	-2.397	1.68134	-2.20024	0.217462	-0.378546	5.28763			0.00763	-0.239092	-2.03998	-0.3339	-0.231224	-1.69607	3.05907	-0.07357	0.089978	-0.806946	0.74424	3.35472	4.46902	0.866446	-1.43447	-0.590464	1.27957
0.972	2.67463	-0.37114	2.39023	-1.02088	-0.167118	0.891534	0.618716	-0.74655	-1.35264	-1.70022	0.595098	-2.41101	1.66818	-2.19288	0.224098	-0.299376	5.29344			0.016856	-0.26502	-2.05318	-0.355306	-0.259616	-1.72175	3.07966	-0.078484	0.116788	-0.79856	0.75208	3.34726	4.51591	0.854938	-1.43048	-0.580832	1.39961
0.974	2.64561	-0.365498	2.41296	-1.03505	-0.148428	0.88179	0.594146	-0.735714	-1.34172	-1.72073	0.60557	-2.38493	1.6814	-2.1834	0.21385	-0.206612	5.29136			0.007882	-0.249816	-2.05615	-0.357406	-0.255948	-1.71584	3.06839	-0.051016	0.140504	-0.795214	0.75775	3.3375	4.50463	0.863128	-1.43881	-0.543284	1.40224
0.976	2.64814	-0.346752	2.42731	-1.03012	-0.189406	0.868826	0.639758	-0.711354	-1.33988	-1.72648	0.608356	-2.36825	1.67003	-2.1754	0.21924	-0.136696	5.32092			0.001834	-0.276514	-2.04761	-0.351778	-0.282268	-1.71034	3.07615	-0.041944	0.126378	-0.780444	0.754278	3.3146	4.57135	0.853888	-1.45148	-0.530936	1.33179
0.978	2.6494	-0.343028	2.41105	-1.03102	-0.176246	0.897092	0.669172	-0.723898	-1.33035	-1.73673	0.60809	-2.36555	1.65784	-2.17035	0.223888	-0.19236	5.2928			0.038654	-0.292684	-2.02913	-0.343252	-0.284984	-1.73354	3.07684	-0.035798	0.11711	-0.791224	0.74193	3.32598	4.61755	0.846034	-1.45064	-0.486122	1.32034
0.98	2.66157	-0.35714	2.43293	-1.0331	-0.169946	0.882098	0.680162	-0.731822	-1.33962	-1.75479	0.60795	-2.39984	1.66165	-2.20447	0.220318	-0.20482	5.2509			0.050834	-0.295204	-2.03497	-0.340354	-0.301	-1.71647	3.05715	-0.04501	0.099974	-0.782964	0.739186	3.34704	4.62636	0.863072	-1.44249	-0.470568	1.30224
0.982	2.68922	-0.347774	2.41871	-1.03961	-0.18312	0.874426	0.696164	-0.736652	-1.32754	-1.76372	0.597506	-2.40433	1.6547	-2.23317	0.213892	-0.237902	5.29935			0.080234	-0.298172	-2.04225	-0.35042	-0.278446	-1.7204	3.10267	-0.052864	0.114086	-0.784322	0.73542	3.36428	4.59235	0.872466	-1.46105	-0.483014	1.29805
0.984	2.69286	-0.354676	2.41368	-1.03524	-0.152936	0.862078	0.691026	-0.741818	-1.39462	-1.75195	0.59346	-2.43641	1.6261	-2.2398	0.195174	-0.248976	5.26163			0.079282	-0.286692	-2.02971	-0.350196	-0.271278	-1.72351	3.13356	-0.04403	0.087808	-0.793338	0.737968	3.39192	4.57694	0.886872	-1.45673	-0.518294	1.33749
0.986	2.6915	-0.341208	2.41052	-1.04047	-0.168882	0.875154	0.70574	-0.738304	-1.36468	-1.74857	0.585998	-2.46553	1.64151	-2.23159	0.199626	-0.18676	5.28542			0.080556	-0.28364	-2.06986	-0.340256	-0.272972	-1.73176	3.13379	-0.05145	0.101962	-0.834554	0.748076	3.37193	4.59808	0.89544	-1.47988	-0.532098	1.38797
0.988	2.71099	-0.354662	2.42234	-1.03631	-0.182854	0.869918	0.690242	-0.72681	-1.39472	-1.74615	0.58233	-2.46364	1.66029	-2.21509	0.219394	-0.109438	5.30089			0.003444	-0.298522	-2.05488	-0.325626	-0.25977	-1.75986	3.16023	-0.055482	0.099288	-0.838166	0.755874	3.3437	4.57997	0.881006	-1.47211	-0.490644	1.43583
0.99	2.69585	-0.365232	2.44537	-1.03761	-0.17563	0.85358	0.643902	-0.749672	-1.39429	-1.7407	0.589974	-2.46093	1.67119	-2.20777	0.222376	-0.040544	5.29067			-0.019516	-0.306026	-2.05776	-0.328888	-0.27069	-1.76609	3.16914	-0.099428	0.116242	-0.82096	0.757428	3.3545	4.62207	0.870618	-1.45824	-0.471072	1.56682
0.992	2.71078	-0.384342	2.47346	-1.05227	-0.173544	0.837858	0.620774	-0.76223	-1.38258	-1.75977	0.598738	-2.45724	1.65409	-2.20805	0.242788	0.033264	5.30015			-0.014364	-0.3087	-2.05208	-0.343966	-0.279006	-1.78413	3.16166	-0.074424	0.110768	-0.787948	0.756756	3.32289	4.65276	0.858116	-1.46728	-0.42154	1.52039
0.994	2.71482	-0.359142	2.45906	-1.05693	-0.15904	0.832076	0.614068	-0.755902	-1.3916	-1.75279	0.615398	-2.42474	1.6578	-2.22484	0.23989	0.082908	5.28531			0.00042	-0.288666	-2.05435	-0.365526	-0.287868	-1.76483	3.15879	-0.069538	0.116326	-0.770994	0.765814	3.35163	4.67239	0.878626	-1.47398	-0.418348	1.47064
0.996	2.69658	-0.345296	2.49467	-1.04999	-0.1561	0.856716	0.650062	-0.73472	-1.35869	-1.76912	0.62132	-2.44476	1.63045	-2.2399	0.214102	2.8e-05	5.25536			0.011088	-0.26047	-2.05281	-0.365274	-0.277774	-1.76651	3.17253	-0.062832	0.106204	-0.805434	0.762272	3.37646	4.71649	0.885192	-1.47851	-0.384818	1.47175
0.998	2.71253	-0.35287	2.49722	-1.04308	-0.177744	0.868378	0.67872	-0.718774	-1.36385	-1.79378	0.620942	-2.48139	1.63502	-2.26542	0.198324	0.00504	5.27246			0.083118	-0.304486	-2.03269	-0.366506	-0.286678	-1.76064	3.14934	-0.03493	0.10997	-0.810768	0.76482	3.37239	4.70284	0.893354	-1.48795	-0.400932	1.47102
1	2.71502	-0.343238	2.52868	-1.0439	-0.186508	0.854742	0.71484	-0.743176	-1.37073	-1.79861	0.627508	-2.49551	1.6207	-2.27492	0.212408	-0.012236	5.29767			0.139524	-0.308406	-2.01069	-0.357462	-0.28217	-1.75721	3.1633	-0.053872	0.102956	-0.788144	0.760396	3.40071	4.70394	0.898842	-1.48099	-0.422814	1.46952
1.002	2.73161	-0.345702	2.48853	-1.04518	-0.16912	0.84833	0.691376	-0.763504	-1.40001	-1.81588	0.626136	-2.54173	1.61001	-2.26891	0.215488	0.007938	5.29098			0.141428	-0.327586	-2.00542	-0.363076	-0.26831	-1.79025	3.16162	-0.070028	0.109018	-0.795088	0.75551	3.42423	4.69706	0.886984	-1.49409	-0.429408	1.49908
1.004	2.73706	-0.359996	2.5027	-1.0724	-0.147434	0.826112	0.695758	-0.753046	-1.41691	-1.78374	0.615468	-2.5166	1.59762	-2.25427	0.225596	0.063392	5.30729			0.108472	-0.31458	-2.04327	-0.36743	-0.27244	-1.80922	3.18136	-0.072422	0.110026	-0.844186	0.752808	3.39436	4.65944	0.894992	-1.46573	-0.39711	1.60261
1.006	2.74939	-0.362474	2.48433	-1.07283	-0.159516	0.847714	0.689836	-0.746914	-1.42199	-1.78578	0.6125	-2.51747	1.62849	-2.23118	0.22141	0.117488	5.32645			0.064876	-0.273	-2.05236	-0.351218	-0.262122	-1.81691	3.2447	-0.05334	0.108304	-0.814604	0.749994	3.36692	4.66963	0.893928	-1.49464	-0.34783	1.65571
1.008	2.74434	-0.351442	2.49732	-1.06483	-0.167342	0.834806	0.711564	-0.747502	-1.40708	-1.78984	0.60872	-2.50541	1.65365	-2.24456	0.23807	0.215516	5.35678			0.026782	-0.294	-2.08599	-0.337988	-0.286454	-1.82001	3.25893	-0.071484	0.139832	-0.817978	0.759808	3.34687	4.69829	0.894502	-1.47316	-0.324408	1.69114
1.01	2.75442	-0.349636	2.51646	-1.06145	-0.176386	0.817712	0.679406	-0.765296	-1.40385	-1.79658	0.608496	-2.49551	1.64147	-2.26663	0.244244	0.280784	5.33292			-0.003178	-0.304108	-2.07973	-0.340032	-0.29841	-1.82021	3.25707	-0.083076	0.136612	-0.82152	0.759976	3.37049	4.75581	0.897008	-1.48242	-0.298536	1.73271
1.012	2.74505	-0.360528	2.4954	-1.06224	-0.154644	0.822248	0.635292	-0.774354	-1.39871	-1.82168	0.604394	-2.5041	1.6255	-2.28543	0.242942	0.31206	5.34765			0.015232	-0.3066	-2.08698	-0.358638	-0.307412	-1.80216	3.26399	-0.094808	0.123508	-0.794836	0.758156	3.42556	4.78254	0.897554	-1.49786	-0.237566	1.64352
1.014	2.75023	-0.333088	2.52038	-1.06533	-0.168476	0.844522	0.579642	-0.76083	-1.37837	-1.82196	0.619682	-2.52539	1.61074	-2.29888	0.22414	0.298144	5.31093			0.060606	-0.309442	-2.09643	-0.36862	-0.284074	-1.79876	3.24576	-0.06265	0.12859	-0.8106	0.75684	3.43539	4.75383	0.902566	-1.50352	-0.230454	1.61188
1.016	2.76814	-0.33418	2.55794	-1.07873	-0.16611	0.889686	0.597436	-0.753214	-1.39055	-1.82753	0.631484	-2.5642	1.58731	-2.31372	0.208908	0.25144	5.30404			0.115696	-0.30681	-2.06315	-0.374598	-0.307972	-1.78688	3.24691	-0.076804	0.10395	-0.805196	0.769482	3.45447	4.75887	0.908782	-1.50688	-0.240632	1.6136
1.018	2.74166	-0.322126	2.5305	-1.08539	-0.158494	0.87626	0.640766	-0.726012	-1.41051	-1.86701	0.645176	-2.58478	1.56636	-2.30149	0.217098	0.250306	5.3339			0.140322	-0.31388	-2.0382	-0.372092	-0.30996	-1.80461	3.27391	-0.068096	0.096068	-0.809522	0.76839	3.46555	4.73213	0.91189	-1.52488	-0.238028	1.6165
1.02	2.74432	-0.3325	2.56404	-1.08402	-0.165886	0.858998	0.694736	-0.764106	-1.42776	-1.83617	0.653366	-2.61412	1.59957	-2.28119	0.231812	0.25263	5.34248			0.1715	-0.301686	-2.03463	-0.371952	-0.288932	-1.8209	3.25921	-0.070098	0.12313	-0.787402	0.770728	3.42131	4.74324	0.913402	-1.50501	-0.30121	1.64471
1.022	2.75556	-0.338884	2.56299	-1.08206	-0.187096	0.828604	0.713748	-0.756714	-1.4538	-1.82158	0.653492	-2.61901	1.62932	-2.27886	0.2373	0.245252	5.34353			0.155274	-0.315742	-2.06975	-0.369418	-0.280868	-1.86017	3.25514	-0.079646	0.11438	-0.77819	0.774802	3.42035	4.75024	0.907298	-1.50742	-0.3115	1.66274
1.024	2.75976	-0.339836	2.54386	-1.08175	-0.176232	0.840448	0.701806	-0.752346	-1.44764	-1.83469	0.658574	-2.57193	1.64178	-2.27997	0.236376	0.296016	5.3397			0.130732	-0.299012	-2.03864	-0.379876	-0.291522	-1.84705	3.26291	-0.080948	0.097748	-0.836976	0.767368	3.39136	4.78167	0.911484	-1.51224	-0.252462	1.75802
1.026	2.77561	-0.338072	2.5618	-1.07726	-0.177436	0.871444	0.685692	-0.759738	-1.43713	-1.80522	0.642208	-2.54743	1.60516	-2.29726	0.227654	0.425894	5.35564			0.075194	-0.286818	-2.07159	-0.371308	-0.31626	-1.85723	3.28591	-0.052822	0.148876	-0.82957	0.752108	3.41925	4.82205	0.913808	-1.53244	-0.193606	1.82655
1.028	2.77276	-0.351624	2.56844	-1.08966	-0.1603	0.903882	0.699594	-0.755188	-1.42856	-1.84066	0.644896	-2.55567	1.58677	-2.32817	0.207564	0.489062	5.35046			0.053214	-0.300412	-2.08648	-0.354074	-0.305676	-1.8362	3.3266	-0.051534	0.151172	-0.841946	0.758422	3.42055	4.86517	0.918876	-1.52991	-0.123158	1.83627
1.03	2.79763	-0.349104	2.59049	-1.08077	-0.161518	0.93093	0.689458	-0.755076	-1.4208	-1.84778	0.643258	-2.56441	1.58493	-2.34371	0.237216	0.498442	5.36288			0.050904	-0.305676	-2.08337	-0.354662	-0.311766	-1.81744	3.34754	-0.085848	0.115052	-0.825958	0.753382	3.42	4.86809	0.928214	-1.52004	-0.135324	1.72129
1.032	2.79304	-0.324296	2.59056	-1.08847	-0.146286	0.90622	0.64498	-0.793926	-1.41742	-1.85679	0.632114	-2.64198	1.56731	-2.34472	0.205254	0.412804	5.30778			0.077154	-0.32004	-2.08524	-0.385126	-0.306152	-1.84005	3.35927	-0.083202	0.12418	-0.821982	0.763826	3.43461	4.83234	0.923748	-1.51985	-0.094962	1.72138
1.034	2.81098	-0.354886	2.61407	-1.08357	-0.168658	0.8645	0.618478	-0.774228	-1.4281	-1.86127	0.62265	-2.64908	1.53189	-2.33176	0.223342	0.424298	5.32966			0.130802	-0.31689	-2.09671	-0.387828	-0.284312	-1.86124	3.35346	-0.064498	0.103082	-0.835632	0.769468	3.44624	4.8028	0.924868	-1.53689	-0.094052	1.70807
1.036	2.79882	-0.345702	2.62023	-1.09801	-0.139958	0.834106	0.61082	-0.773332	-1.43997	-1.87246	0.632044	-2.67655	1.55607	-2.31161	0.204414	0.432208	5.32069			0.144424	-0.315098	-2.09882	-0.399448	-0.277606	-1.85907	3.34158	-0.047166	0.120288	-0.82089	0.77126	3.45248	4.81335	0.914984	-1.55371	-0.135716	1.73769
1.038	2.80084	-0.347662	2.6251	-1.09033	-0.153398	0.860832	0.599564	-0.771484	-1.45169	-1.88423	0.64309	-2.68545	1.58556	-2.31291	0.23604	0.44282	5.33413			0.139454	-0.287742	-2.06053	-0.397642	-0.296814	-1.87558	3.34491	-0.0763	0.11165	-0.80941	0.763014	3.44056	4.83174	0.92015	-1.54826	-0.13769	1.78203
1.04	2.77257	-0.368102	2.62671	-1.08804	-0.171332	0.884912	0.653142	-0.760438	-1.4628	-1.88938	0.65317	-2.64971	1.5699	-2.31654	0.25172	0.464016	5.32937			0.122528	-0.290094	-2.02926	-0.399112	-0.288736	-1.85471	3.33983	-0.066248	0.136318	-0.822808	0.771008	3.41995	4.84571	0.947884	-1.52008	-0.11788	1.81622
1.042	2.77431	-0.364392	2.62773	-1.08499	-0.18361	0.902384	0.675388	-0.77161	-1.46975	-1.87538	0.662564	-2.62532	1.5849	-2.32974	0.229362	0.56161	5.32363			0.11515	-0.331968	-2.03094	-0.39732	-0.292824	-1.84894	3.34478	-0.07819	0.11914	-0.842268	0.77042	3.41657	4.89143	0.949242	-1.55133	-0.061278	1.89855
1.044	2.7966	-0.367388	2.63262	-1.10355	-0.17059	0.919128	0.693154	-0.788102	-1.46052	-1.89032	0.6727	-2.62028	1.57868	-2.36023	0.223734	0.599536	5.32616			0.064008	-0.323274	-2.03374	-0.388458	-0.28511	-1.86998	3.3383	-0.07609	0.144634	-0.860594	0.770994	3.42902	4.90797	0.947044	-1.54456	0.017402	1.95958
1.046	2.81152	-0.359898	2.61747	-1.10904	-0.15834	0.911876	0.67585	-0.796642	-1.44945	-1.89315	0.66941	-2.63642	1.551	-2.36897	0.208208	0.656446	5.33998			0.093898	-0.290206	-2.09201	-0.386722	-0.28371	-1.86385	3.379	-0.062678	0.13013	-0.871136	0.777154	3.44841	4.93039	0.93723	-1.54727	0.08113	2.02462
1.048	2.82166	-0.355488	2.63235	-1.10296	-0.136682	0.938966	0.695282	-0.781676	-1.42652	-1.89113	0.669928	-2.67912	1.52561	-2.36737	0.195776	0.659582	5.34423			0.094836	-0.312368	-2.09983	-0.381318	-0.311052	-1.89067	3.39583	-0.060704	0.1386	-0.856296	0.769902	3.46312	4.8847	0.933184	-1.5702	0.106386	1.91642
1.05	2.83234	-0.36071	2.64845	-1.09841	-0.131264	0.89299	0.678328	-0.776384	-1.44543	-1.91986	0.66983	-2.72906	1.51409	-2.35267	0.215656	0.610848	5.31584			0.127722	-0.315672	-2.08215	-0.385518	-0.302246	-1.86836	3.41414	-0.042574	0.098028	-0.845432	0.766234	3.47474	4.86651	0.93492	-1.57304	0.10766	1.88656
1.052	2.83536	-0.383698	2.6817	-1.10198	-0.145684	0.879536	0.680946	-0.807198	-1.46773	-1.91002	0.669662	-2.75241	1.55611	-2.34634	0.220696	0.59514	5.31528			0.126378	-0.326662	-2.10456	-0.391244	-0.318402	-1.89756	3.38076	-0.082642	0.100884	-0.833098	0.769874	3.45897	4.88064	0.95095	-1.54741	0.0819	1.85378
1.054	2.83559	-0.373352	2.67319	-1.09911	-0.144004	0.881706	0.624498	-0.798238	-1.48644	-1.92928	0.663208	-2.74821	1.5919	-2.33345	0.218106	0.602868	5.31154			0.160916	-0.321034	-2.12541	-0.420952	-0.285768	-1.90219	3.41985	-0.079702	0.106988	-0.840994	0.756714	3.42979	4.87683	0.954268	-1.54385	0.04326	1.88626
1.056	2.85197	-0.352576	2.67918	-1.10718	-0.16842	0.879578	0.623784	-0.784728	-1.49205	-1.94799	0.658546	-2.72738	1.59373	-2.34101	0.207816	0.612388	5.33002			0.158172	-0.273672	-2.0939	-0.423024	-0.289996	-1.90065	3.39661	-0.067284	0.094388	-0.829122	0.7553	3.42649	4.9187	0.964894	-1.55788	0.032326	1.92598
1.058	2.81401	-0.381836	2.67631	-1.11933	-0.195622	0.901712	0.62601	-0.773276	-1.49843	-1.92349	0.649208	-2.69664	1.55981	-2.36414	0.214886	0.678986	5.32853			0.161448	-0.298088	-2.07035	-0.42336	-0.325542	-1.87827	3.40987	-0.058674	0.10906	-0.829682	0.763714	3.42455	4.96444	0.963718	-1.56835	0.085358	1.91955
1.06	2.81651	-0.382718	2.72581	-1.11765	-0.173992	0.90643	0.653716	-0.781256	-1.46849	-1.90593	0.650594	-2.69405	1.54937	-2.36228	0.215082	0.718466	5.33476			0.12201	-0.31507	-2.05674	-0.407316	-0.32858	-1.90631	3.42033	-0.077812	0.152306	-0.854952	0.778232	3.44606	4.97057	0.94472	-1.55228	0.164276	2.025
1.062	2.82169	-0.371798	2.699	-1.11622	-0.196252	0.899948	0.687106	-0.781172	-1.47216	-1.9111	0.665266	-2.73848	1.53818	-2.35767	0.192472	0.780878	5.33877			0.11347	-0.297934	-2.05936	-0.39865	-0.299124	-1.90907	3.41635	-0.076832	0.134708	-0.866264	0.771022	3.46776	5.01952	0.944412	-1.57462	0.233604	2.07245
1.064	2.83731	-0.356972	2.7194	-1.11056	-0.15148	0.884716	0.693784	-0.793884	-1.49852	-1.92419	0.672098	-2.76535	1.54566	-2.37157	0.203896	0.813652	5.31066			0.109284	-0.33047	-2.04537	-0.404684	-0.303212	-1.93714	3.41183	-0.071988	0.110194	-0.871416	0.772506	3.44624	4.97764	0.951188	-1.56793	0.2814	2.11646
1.066	2.84106	-0.350182	2.70012	-1.12099	-0.143654	0.881622	0.697466	-0.785554	-1.49547	-1.93505	0.681464	-2.80056	1.53597	-2.38211	0.202006	0.78225	5.32675			0.127176	-0.29316	-2.10119	-0.399546	-0.27188	-1.94179	3.43109	-0.085498	0.116368	-0.86499	0.772548	3.47715	4.9772	0.968352	-1.58584	0.310282	2.01776
1.068	2.8512	-0.366618	2.70235	-1.1123	-0.134036	0.851662	0.693266	-0.77294	-1.48578	-1.95684	0.693364	-2.81915	1.54599	-2.38773	0.22225	0.730632	5.29516			0.128086	-0.291214	-2.10851	-0.415954	-0.295568	-1.93662	3.47903	-0.054096	0.115528	-0.855568	0.78008	3.47939	4.94458	0.973826	-1.57009	0.280952	2.00054
1.07	2.86293	-0.377272	2.74033	-1.11231	-0.14336	0.848092	0.68992	-0.788256	-1.49338	-1.95999	0.695058	-2.82519	1.53409	-2.38087	0.219072	0.74732	5.28322			0.168644	-0.310254	-2.11128	-0.417354	-0.31976	-1.9252	3.50615	-0.0735	0.107492	-0.849926	0.783146	3.43599	4.99708	0.980462	-1.5717	0.284746	1.99172
1.072	2.87007	-0.379064	2.7463	-1.11651	-0.14602	0.85785	0.648396	-0.821576	-1.50496	-1.96735	0.696556	-2.78603	1.5408	-2.36901	0.22505	0.754208	5.30859			0.186494	-0.307146	-2.11847	-0.42532	-0.324142	-1.9182	3.51082	-0.100464	0.10626	-0.843472	0.78435	3.42124	5.03042	0.970312	-1.57917	0.243474	1.96463
1.074	2.8593	-0.379736	2.75524	-1.12984	-0.17864	0.88046	0.595084	-0.822458	-1.50968	-1.96458	0.699174	-2.781	1.52681	-2.36649	0.226548	0.757778	5.31958			0.186746	-0.287028	-2.12237	-0.429254	-0.304346	-1.92507	3.50818	-0.085498	0.08281	-0.82866	0.773388	3.4179	5.03387	0.953134	-1.59026	0.246036	2.02469
1.076	2.8499	-0.372582	2.75412	-1.13217	-0.200634	0.886564	0.577164	-0.814156	-1.52797	-1.99245	0.675458	-2.77571	1.52117	-2.37672	0.223496	0.800618	5.31566			0.204022	-0.31346	-2.12299	-0.43057	-0.295764	-1.91299	3.48737	-0.074102	0.101808	-0.825188	0.763868	3.46769	5.05574	0.955528	-1.60299	0.323428	2.09768
1.078	2.85114	-0.388122	2.75925	-1.1269	-0.20097	0.870492	0.587272	-0.787794	-1.508	-1.96636	0.678202	-2.8064	1.51266	-2.39302	0.220598	0.838768	5.31404			0.194432	-0.283878	-2.07568	-0.435414	-0.314356	-1.93904	3.48807	-0.0588	0.10675	-0.850192	0.756406	3.47126	5.05386	0.968478	-1.60913	0.41083	2.17069
1.08	2.84964	-0.379036	2.76753	-1.12878	-0.212674	0.90097	0.632982	-0.78043	-1.52489	-1.96461	0.66514	-2.81998	1.47559	-2.40856	0.22631	0.882798	5.2963			0.167804	-0.309064	-2.07726	-0.428722	-0.310702	-1.9448	3.48229	-0.082628	0.160664	-0.89257	0.769314	3.4813	5.03541	0.981876	-1.59593	0.480018	2.25532
1.082	2.89433	-0.366604	2.76206	-1.12146	-0.19355	0.88942	0.649754	-0.806442	-1.52363	-1.97294	0.667114	-2.87903	1.48427	-2.41968	0.2338	0.902454	5.32025			0.175336	-0.3234	-2.08664	-0.415324	-0.299642	-1.97992	3.48082	-0.081382	0.154784	-0.88144	0.78218	3.48508	5.02641	0.996002	-1.60646	0.53438	2.24608
1.084	2.91292	-0.364574	2.74813	-1.11969	-0.178738	0.897554	0.653044	-0.812728	-1.52071	-1.98178	0.673078	-2.88929	1.50566	-2.42046	0.229684	0.893956	5.29386			0.19796	-0.333648	-2.09538	-0.409934	-0.293328	-1.98761	3.50535	-0.084868	0.15645	-0.893508	0.777714	3.4686	5.04629	1.00061	-1.59457	0.51856	2.16429
1.086	2.88753	-0.371014	2.75569	-1.14302	-0.145992	0.849338	0.632002	-0.80143	-1.52177	-1.98951	0.687344	-2.89166	1.52698	-2.40982	0.221326	0.850976	5.28528			0.19201	-0.341824	-2.1218	-0.416402	-0.291088	-1.99742	3.52516	-0.09604	0.120372	-0.866698	0.773094	3.42944	5.04129	0.982786	-1.59974	0.517454	2.17508
1.088	2.89019	-0.375452	2.77581	-1.14387	-0.17717	0.84063	0.639352	-0.811986	-1.5153	-1.98899	0.694064	-2.86234	1.52236	-2.40033	0.221452	0.866922	5.32638			0.203574	-0.311234	-2.12316	-0.41839	-0.301378	-1.97851	3.54047	-0.083762	0.095368	-0.861434	0.77987	3.44744	5.09842	0.978558	-1.6141	0.502656	2.1833
1.09	2.92795	-0.362978	2.78755	-1.13968	-0.208866	0.85918	0.641186	-0.77574	-1.54697	-2.0221	0.70952	-2.85572	1.52225	-2.3843	0.221816	0.863394	5.33009			0.210798	-0.30653	-2.12723	-0.426286	-0.318066	-1.96734	3.57512	-0.075096	0.101136	-0.866698	0.790426	3.43612	5.15112	0.978446	-1.64051	0.473732	2.13851
1.092	2.92139	-0.378924	2.82901	-1.13371	-0.218554	0.876554	0.612556	-0.82264	-1.57605	-2.00892	0.713622	-2.82762	1.48532	-2.40526	0.208726	0.88585	5.32736			0.221074	-0.28462	-2.11702	-0.426706	-0.309568	-1.96206	3.60016	-0.083286	0.108976	-0.888384	0.793604	3.48443	5.12887	0.99582	-1.63821	0.473102	2.16005
1.094	2.91837	-0.391692	2.83373	-1.13382	-0.209132	0.910308	0.571396	-0.839622	-1.54183	-2.02454	0.72338	-2.86094	1.50293	-2.42234	0.217266	0.916412	5.32815			0.208894	-0.309092	-2.12405	-0.43736	-0.30401	-1.99143	3.55818	-0.084602	0.09926	-0.850486	0.793548	3.47302	5.12148	1.00544	-1.64014	0.537642	2.2314
1.096	2.88147	-0.40404	2.82325	-1.13789	-0.196994	0.867286	0.541618	-0.843024	-1.55816	-2.01337	0.718718	-2.90123	1.46049	-2.45335	0.217014	0.983276	5.30545			0.243474	-0.339654	-2.12359	-0.44002	-0.31675	-1.98824	3.55464	-0.088746	0.142338	-0.871654	0.78358	3.50617	5.11482	1.0101	-1.63555	0.627214	2.29411
1.098	2.92526	-0.377972	2.83951	-1.13684	-0.18375	0.84133	0.519162	-0.816564	-1.54616	-2.0272	0.715134	-2.91323	1.47722	-2.46176	0.212562	1.01086	5.30641			0.23128	-0.302876	-2.09777	-0.440342	-0.312536	-2.01552	3.5523	-0.074536	0.144494	-0.90993	0.776902	3.50601	5.10492	1.01864	-1.63002	0.694344	2.37306
1.1	2.93495	-0.372148	2.85466	-1.1545	-0.203	0.83531	0.559482	-0.788494	-1.56008	-2.04638	0.711452	-2.95033	1.47617	-2.45764	0.235088	1.03566	5.31864			0.207228	-0.30555	-2.07955	-0.42875	-0.281022	-2.01543	3.56321	-0.080206	0.130032	-0.91084	0.772856	3.4879	5.10091	1.02262	-1.62968	0.70147	2.41706
1.102	2.9422	-0.381136	2.83882	-1.15461	-0.190932	0.873292	0.59871	-0.800324	-1.55065	-2.02539	0.708092	-2.97402	1.48077	-2.43166	0.241458	0.998396	5.31598			0.223846	-0.30877	-2.0888	-0.421778	-0.28427	-2.03578	3.58026	-0.095536	0.145768	-0.891968	0.777098	3.46931	5.12231	1.01889	-1.63778	0.683452	2.29792
1.104	2.93986	-0.384048	2.849	-1.1552	-0.206024	0.897904	0.62363	-0.809914	-1.55183	-2.02196	0.699216	-2.95949	1.47175	-2.41805	0.232036	0.973588	5.28195			0.22918	-0.289464	-2.07192	-0.42371	-0.298802	-2.035	3.58086	-0.101346	0.12537	-0.854854	0.777126	3.47103	5.18673	1.00414	-1.65193	0.683032	2.30611
1.106	2.93532	-0.375704	2.83857	-1.14876	-0.185836	0.922488	0.619206	-0.825902	-1.56717	-2.04051	0.690634	-2.91396	1.44736	-2.42253	0.225218	0.971026	5.28767			0.228914	-0.313712	-2.12008	-0.43043	-0.307692	-2.02383	3.58127	-0.085736	0.129332	-0.877548	0.790622	3.43316	5.23485	1.00859	-1.64583	0.639492	2.25428
1.108	2.96125	-0.360878	2.8295	-1.15501	-0.209468	0.92022	0.598038	-0.831894	-1.55921	-2.04658	0.701218	-2.9078	1.47374	-2.43089	0.227024	0.997738	5.32435			0.220388	-0.297626	-2.13823	-0.444514	-0.302904	-2.00498	3.61696	-0.062538	0.138502	-0.89705	0.796628	3.489	5.21641	1.01389	-1.66335	0.646632	2.29449
1.11	2.98418	-0.371728	2.84432	-1.14505	-0.196392	0.89558	0.592872	-0.822864	-1.56923	-2.09366	0.703822	-2.92841	1.4344	-2.46033	0.204582	1.01303	5.32671			0.229922	-0.261884	-2.10801	-0.4613	-0.32368	-1.99359	3.62162	-0.070322	0.136556	-0.884058	0.796586	3.49271	5.20481	1.01983	-1.71944	0.687358	2.33247
1.112	2.98561	-0.377594	2.91403	-1.15856	-0.21175	0.8743	0.59122	-0.818034	-1.60726	-2.09077	0.720272	-2.98264	1.43448	-2.47792	0.219926	1.04618	5.31341			0.243978	-0.307636	-2.12538	-0.464156	-0.33271	-2.02745	3.63437	-0.08799	0.136766	-0.877898	0.79548	3.4761	5.18258	1.0386	-1.65924	0.758548	2.37458
1.114	2.99033	-0.355432	2.90851	-1.15564	-0.193942	0.845264	0.577332	-0.831362	-1.61477	-2.07136	0.728112	-3.02466	1.45488	-2.48794	0.217392	1.09998	5.30013			0.254408	-0.30429	-2.125	-0.450604	-0.34391	-2.05891	3.62666	-0.064078	0.158396	-0.88984	0.79695	3.48691	5.23837	1.04373	-1.65054	0.807646	2.45568
1.116	2.94631	-0.375564	2.86791	-1.17195	-0.164346	0.854602	0.589246	-0.847126	-1.58017	-2.05538	0.7399	-3.02397	1.48536	-2.49424	0.221942	1.14054	5.28735			0.253246	-0.308266	-2.12891	-0.449848	-0.304052	-2.0722	3.63804	-0.083048	0.13713	-0.921844	0.797342	3.49698	5.17402	1.04489	-1.64559	0.909258	2.52265
1.118	2.96656	-0.356818	2.90235	-1.1765	-0.166544	0.879242	0.649614	-0.85253	-1.58848	-2.06027	0.736876	-3.02453	1.4891	-2.48823	0.213542	1.16136	5.30481			0.240394	-0.318626	-2.09982	-0.44443	-0.281792	-2.06482	3.66171	-0.069818	0.134974	-0.902454	0.80409	3.46202	5.18162	1.0375	-1.67394	0.906486	2.4955
1.12	2.97436	-0.3738	2.92432	-1.17457	-0.185724	0.889882	0.642362	-0.832328	-1.57654	-2.07421	0.737002	-2.98409	1.47721	-2.46483	0.226632	1.10335	5.30629			0.240506	-0.308504	-2.06727	-0.435232	-0.31234	-2.02826	3.64095	-0.070714	0.157178	-0.896476	0.791182	3.46584	5.25279	1.03321	-1.67959	0.884394	2.39652
1.122	2.98362	-0.375004	2.92181	-1.16911	-0.191702	0.900172	0.645694	-0.825202	-1.57654	-2.0957	0.728868	-2.97695	1.47017	-2.45743	0.221438	1.11716	5.31744			0.22792	-0.308686	-2.06097	-0.440972	-0.309526	-2.04207	3.63283	-0.102564	0.117852	-0.889182	0.779184	3.44485	5.28875	1.03946	-1.68629	0.89383	2.40289
1.124	2.9918	-0.369096	2.91466	-1.15294	-0.202594	0.888216	0.630756	-0.810026	-1.58752	-2.0833	0.723058	-2.98264	1.43515	-2.46434	0.214424	1.11861	5.34257			0.244328	-0.320418	-2.0594	-0.450702	-0.345408	-2.06094	3.64431	-0.12383	0.123382	-0.890106	0.785134	3.45649	5.30089	1.04147	-1.6889	0.855554	2.37994
1.126	2.9813	-0.347844	2.9071	-1.17166	-0.192122	0.898226	0.582288	-0.839818	-1.57868	-2.10087	0.715862	-2.99688	1.40979	-2.47744	0.212072	1.12141	5.2997			0.223594	-0.299306	-2.08473	-0.46368	-0.316498	-2.08564	3.63796	-0.113596	0.108318	-0.901166	0.780598	3.4672	5.23869	1.05826	-1.67118	0.853818	2.43372
1.128	3.00411	-0.381234	2.91221	-1.18296	-0.18298	0.852348	0.57561	-0.829052	-1.60985	-2.10652	0.708134	-3.05199	1.39079	-2.50506	0.214774	1.1353	5.30849			0.223748	-0.318136	-2.13312	-0.476868	-0.332766	-2.07612	3.63846	-0.103292	0.131446	-0.88095	0.79317	3.47526	5.24759	1.05972	-1.69273	0.903308	2.47439
1.13	3.00555	-0.386274	2.90928	-1.19381	-0.197596	0.851228	0.58275	-0.828128	-1.61944	-2.09703	0.70805	-3.07724	1.43118	-2.51742	0.227416	1.16003	5.31005			0.241948	-0.330246	-2.12765	-0.471506	-0.323414	-2.07474	3.65128	-0.100366	0.132202	-0.921592	0.803936	3.5114	5.25535	1.06495	-1.68938	0.979748	2.54596
1.132	3.03995	-0.360934	2.93489	-1.19561	-0.179746	0.857486	0.611772	-0.84938	-1.61421	-2.08506	0.707126	-3.10019	1.44589	-2.52689	0.223622	1.18777	5.29273			0.270298	-0.31206	-2.11492	-0.473494	-0.330442	-2.07799	3.68071	-0.08057	0.157318	-0.914802	0.80045	3.50412	5.29166	1.06919	-1.68475	1.07436	2.59722
1.134	3.02166	-0.370496	2.99242	-1.19371	-0.186858	0.853314	0.620774	-0.858144	-1.61601	-2.1174	0.72821	-3.09207	1.44031	-2.51598	0.225568	1.20872	5.28144			0.254954	-0.308868	-2.12198	-0.46865	-0.309302	-2.06277	3.69874	-0.072002	0.147924	-0.931602	0.804664	3.47742	5.31651	1.05843	-1.73076	1.12259	2.64785
1.136	2.99617	-0.378252	2.96776	-1.17726	-0.181916	0.8512	0.653324	-0.852796	-1.58871	-2.09835	0.748888	-3.05864	1.43909	-2.50062	0.2667	1.18255	5.30613			0.30079	-0.33376	-2.12177	-0.463736	-0.282884	-2.07263	3.68588	-0.064512	0.133462	-0.926352	0.805	3.46118	5.31509	1.05396	-1.7606	1.13749	2.54563
1.138	3.00705	-0.38346	2.97308	-1.17365	-0.180936	0.841848	0.630588	-0.869736	-1.58334	-2.12307	0.758128	-3.04119	1.44147	-2.49337	0.235214	1.1349	5.29711			0.299866	-0.317408	-2.09929	-0.467586	-0.295344	-2.08956	3.68561	-0.065632	0.141806	-0.932022	0.807604	3.45509	5.36885	1.06358	-1.70542	1.11469	2.52825
1.14	2.98736	-0.362068	2.99837	-1.18497	-0.180544	0.838068	0.650804	-0.842982	-1.58435	-2.11744	0.751828	-3.05466	1.4167	-2.48802	0.2149	1.16928	5.24367			0.308742	-0.33698	-2.06066	-0.4627	-0.311864	-2.10888	3.70957	-0.071638	0.118468	-0.910238	0.794052	3.50122	5.32335	1.07349	-1.7208	1.10431	2.54233
1.142	3.00961	-0.357238	2.98554	-1.19332	-0.18095	0.864024	0.664706	-0.837424	-1.59817	-2.13583	0.757582	-3.06083	1.40517	-2.51272	0.217196	1.16609	5.26166			0.29582	-0.340508	-2.07332	-0.46921	-0.332108	-2.1121	3.71749	-0.108696	0.119966	-0.925316	0.802424	3.48348	5.30694	1.08207	-1.71234	1.09602	2.53889
1.144	3.02558	-0.356748	2.98379	-1.18559	-0.185486	0.845516	0.67648	-0.830984	-1.61673	-2.11588	0.765982	-3.11466	1.41488	-2.53329	0.224266	1.18635	5.25249			0.304864	-0.337974	-2.0886	-0.477148	-0.34188	-2.12778	3.69421	-0.115472	0.125818	-0.910686	0.792428	3.48923	5.3117	1.07843	-1.75774	1.12235	2.55671
1.146	3.01162	-0.372848	2.99291	-1.19489	-0.18319	0.815514	0.695464	-0.854042	-1.64398	-2.12766	0.750218	-3.15396	1.44676	-2.53579	0.228634	1.20162	5.24642			0.308938	-0.349384	-2.13111	-0.477596	-0.327838	-2.11536	3.6839	-0.129136	0.13748	-0.909342	0.793408	3.50706	5.31255	1.06877	-1.71343	1.19759	2.54215
1.148	3.02312	-0.364896	2.97784	-1.20141	-0.171388	0.830858	0.643118	-0.846818	-1.64158	-2.11424	0.74774	-3.16217	1.41882	-2.53016	0.231168	1.22881	5.24243			0.325864	-0.302932	-2.16734	-0.497728	-0.3094	-2.11876	3.67879	-0.112868	0.152348	-0.929432	0.787164	3.51772	5.36332	1.06238	-1.72602	1.2818	2.54873
1.15	3.05497	-0.382578	2.97394	-1.20506	-0.171122	0.841694	0.631162	-0.852124	-1.64788	-2.11942	0.735224	-3.14356	1.40804	-2.52574	0.220262	1.27431	5.24278			0.34419	-0.301504	-2.12248	-0.496258	-0.295344	-2.13273	3.68959	-0.071918	0.135002	-0.94451	0.778372	3.47427	5.41254	1.06355	-1.72703	1.3585	2.74411
1.152	3.04772	-0.380884	3.01381	-1.20191	-0.175462	0.852642	0.64589	-0.854392	-1.61666	-2.14446	0.723856	-3.14325	1.39769	-2.52561	0.238784	1.27268	5.2492			0.313278	-0.317562	-2.1287	-0.49399	-0.32851	-2.1163	3.71309	-0.04592	0.14609	-0.941878	0.7791	3.48181	5.43525	1.07985	-1.74985	1.38838	2.80332
1.154	3.05172	-0.39298	3.03577	-1.19778	-0.182392	0.865508	0.650678	-0.86338	-1.60685	-2.12023	0.732648	-3.14265	1.3916	-2.51511	0.229978	1.27585	5.2299			0.340662	-0.310324	-2.11543	-0.487004	-0.29176	-2.12129	3.74735	-0.041244	0.132622	-0.934696	0.80906	3.46207	5.41827	1.09427	-1.74819	1.36175	2.73988
1.156	3.04814	-0.395444	3.05753	-1.21527	-0.214816	0.825006	0.658686	-0.870954	-1.61168	-2.16983	0.742448	-3.11664	1.35086	-2.52374	0.212786	1.25712	5.2337			0.331212	-0.350658	-2.1152	-0.483742	-0.310254	-2.1489	3.75176	-0.057358	0.139622	-0.944748	0.805588	3.48593	5.36607	1.09754	-1.76077	1.35803	2.74057
1.158	3.10048	-0.383908	3.06401	-1.21015	-0.202314	0.810796	0.666834	-0.88333	-1.59291	-2.14847	0.752542	-3.12693	1.37238	-2.53273	0.19502	1.24495	5.20852			0.288722	-0.329392	-2.07817	-0.474474	-0.300636	-2.17641	3.77268	-0.090972	0.116074	-0.912856	0.804314	3.50342	5.39034	1.07985	-1.7152	1.31034	2.69877
1.16	3.0738	-0.394576	3.08154	-1.21832	-0.193116	0.80934	0.638316	-0.84854	-1.63089	-2.16934	0.75817	-3.15284	1.39553	-2.53774	0.216944	1.2432	5.22763			0.261408	-0.344764	-2.08757	-0.473578	-0.313684	-2.17241	3.76947	-0.0966	0.099708	-0.935172	0.801206	3.50262	5.38338	1.0702	-1.77251	1.35465	2.6984
1.162	3.09873	-0.39207	3.05955	-1.20693	-0.179872	0.814618	0.618128	-0.853076	-1.6248	-2.15706	0.76307	-3.2089	1.4012	-2.53897	0.213906	1.24638	5.24068			0.272636	-0.344372	-2.07154	-0.479248	-0.33376	-2.17456	3.80569	-0.109942	0.123774	-0.90454	0.797384	3.5047	5.42041	1.06862	-1.71378	1.37675	2.68941
1.164	3.09649	-0.382256	3.05449	-1.20777	-0.191338	0.868798	0.606788	-0.870394	-1.65215	-2.15156	0.77273	-3.21082	1.39283	-2.54646	0.237734	1.2755	5.20904			0.24745	-0.358414	-2.08529	-0.496034	-0.33509	-2.18081	3.79925	-0.10402	0.125566	-0.914718	0.807534	3.50041	5.46245	1.08647	-1.74734	1.43718	2.73127
1.166	3.10866	-0.368004	3.07096	-1.20266	-0.175756	0.871248	0.566468	-0.86394	-1.6521	-2.13773	0.78162	-3.23058	1.39482	-2.55702	0.249284	1.31809	5.22616			0.271866	-0.359142	-2.11407	-0.500276	-0.32235	-2.14841	3.76783	-0.10913	0.117432	-0.92785	0.805756	3.49731	5.49945	1.09631	-1.75091	1.50892	2.82825
1.168	3.09474	-0.381444	3.05449	-1.20495	-0.197834	0.8596	0.590968	-0.857556	-1.63402	-2.13699	0.783748	-3.24552	1.38163	-2.56	0.229376	1.35499	5.20282			0.300482	-0.329532	-2.14326	-0.504392	-0.306488	-2.16996	3.75743	-0.082516	0.135156	-0.950978	0.796474	3.47904	5.53781	1.1149	-1.79873	1.56388	2.86763
1.17	3.07902	-0.393302	3.0815	-1.21754	-0.176764	0.82194	0.654458	-0.86072	-1.64241	-2.14117	0.7735	-3.20272	1.38057	-2.55996	0.238252	1.37483	5.2039			0.343112	-0.347396	-2.13758	-0.502516	-0.322616	-2.1681	3.76194	-0.048692	0.136794	-0.962388	0.7945	3.47627	5.53749	1.1045	-1.81527	1.62151	2.94615
1.172	3.11483	-0.362054	3.10594	-1.2249	-0.188412	0.79688	0.695128	-0.869316	-1.63995	-2.1516	0.773262	-3.17269	1.33686	-2.54393	0.21196	1.38762	5.22637			0.359576	-0.33152	-2.14493	-0.495418	-0.320698	-2.18583	3.76663	-0.034384	0.149646	-0.9394	0.791378	3.49943	5.4978	1.10111	-1.7716	1.59543	2.87937
1.174	3.11118	-0.384552	3.11821	-1.22191	-0.227458	0.77714	0.713034	-0.869568	-1.64308	-2.16553	0.757148	-3.20008	1.35211	-2.54995	0.201712	1.35779	5.19383			0.332598	-0.360738	-2.12905	-0.486682	-0.325122	-2.202	3.79387	-0.06489	0.130956	-0.91959	0.783902	3.51151	5.46949	1.09021	-1.76208	1.58533	2.86016
1.176	3.15283	-0.381752	3.12536	-1.21976	-0.219044	0.79359	0.725396	-0.868448	-1.6268	-2.19204	0.763686	-3.24148	1.39377	-2.55258	0.212562	1.32056	5.18522			0.322952	-0.359226	-2.10578	-0.482622	-0.323596	-2.2122	3.81605	-0.083888	0.102116	-0.918792	0.796992	3.49548	5.50397	1.09267	-1.75605	1.54402	2.81924
1.178	3.17687	-0.387156	3.12267	-1.22493	-0.179788	0.809032	0.71561	-0.871164	-1.64741	-2.17332	0.751114	-3.26939	1.42817	-2.57537	0.224728	1.36786	5.18743			0.287154	-0.363426	-2.0662	-0.48888	-0.333886	-2.2092	3.8319	-0.101584	0.106652	-0.907536	0.816592	3.4946	5.50084	1.11758	-1.74833	1.53045	2.81273
1.18	3.17708	-0.386372	3.10778	-1.23487	-0.16933	0.830662	0.653282	-0.873124	-1.66481	-2.21179	0.75873	-3.29619	1.39957	-2.59869	0.222278	1.38023	5.22633			0.23555	-0.374024	-2.07064	-0.505666	-0.322826	-2.17111	3.85613	-0.10724	0.11578	-0.921452	0.815766	3.50092	5.52731	1.12038	-1.76553	1.55401	2.84403
1.182	3.1572	-0.386386	3.11283	-1.21636	-0.166334	0.838502	0.615174	-0.873138	-1.64335	-2.16994	0.77273	-3.31003	1.37889	-2.60662	0.200606	1.40063	5.24388			0.224042	-0.372092	-2.05246	-0.507556	-0.340942	-2.1924	3.84786	-0.09625	0.099778	-0.912268	0.811272	3.4887	5.58615	1.12573	-1.76837	1.63633	2.90669
1.184	3.14731	-0.363356	3.12047	-1.22279	-0.173754	0.825496	0.61607	-0.869988	-1.65567	-2.16219	0.783188	-3.29196	1.35745	-2.61404	0.205898	1.42918	5.22784			0.278054	-0.350014	-2.08565	-0.505904	-0.339724	-2.20678	3.86294	-0.110292	0.108234	-0.951118	0.804958	3.48705	5.57942	1.13617	-1.77873	1.71308	2.9233
1.186	3.12785	-0.383376	3.13466	-1.2299	-0.193886	0.816186	0.62062	-0.873992	-1.65222	-2.18999	0.791098	-3.28384	1.36111	-2.5881	0.225624	1.45398	5.20157			0.345646	-0.314776	-2.13324	-0.501438	-0.31542	-2.21992	3.87675	-0.116186	0.14294	-0.966224	0.809256	3.45635	5.54569	1.1292	-1.78707	1.80009	3.00244
1.188	3.12186	-0.394422	3.13911	-1.23687	-0.183722	0.791672	0.623042	-0.876036	-1.64744	-2.19094	0.799666	-3.26052	1.33238	-2.57558	0.21798	1.46077	5.1927			0.388948	-0.335076	-2.15544	-0.502656	-0.349552	-2.23229	3.84885	-0.102466	0.118384	-0.943852	0.807394	3.4777	5.53309	1.125	-1.78772	1.83599	3.07107
1.19	3.15014	-0.398986	3.16714	-1.24187	-0.187334	0.79821	0.679294	-0.869582	-1.64948	-2.2006	0.797132	-3.2776	1.33888	-2.57996	0.219044	1.42425	5.21564			0.39599	-0.3486	-2.137	-0.514192	-0.329756	-2.19335	3.83725	-0.065492	0.128408	-0.924266	0.797888	3.50907	5.53728	1.12339	-1.79767	1.79875	3.0617
1.192	3.17313	-0.387254	3.19207	-1.24909	-0.212646	0.782796	0.709758	-0.878556	-1.63143	-2.19509	0.805294	-3.2957	1.36898	-2.59584	0.197288	1.43392	5.21304			0.323736	-0.36519	-2.13616	-0.519022	-0.318024	-2.19429	3.86054	-0.082096	0.11879	-0.925358	0.800786	3.49189	5.57411	1.12552	-1.79754	1.79959	2.99799
1.194	3.1914	-0.395948	3.19544	-1.23141	-0.205338	0.81144	0.696276	-0.87759	-1.64654	-2.20762	0.795228	-3.33176	1.35646	-2.61023	0.192528	1.42668	5.21807			0.295246	-0.348418	-2.12747	-0.513464	-0.330554	-2.19005	3.88858	-0.07007	0.097244	-0.93079	0.797678	3.49707	5.6103	1.13186	-1.77187	1.75727	2.96202
1.196	3.20596	-0.388808	3.18877	-1.23325	-0.161308	0.80934	0.717164	-0.896868	-1.67339	-2.22338	0.796754	-3.38605	1.35513	-2.6312	0.207256	1.43347	5.21759			0.278096	-0.377944	-2.08772	-0.501116	-0.334824	-2.22041	3.9192	-0.092162	0.067662	-0.924602	0.807912	3.51072	5.6344	1.14666	-1.80114	1.78457	2.97046
1.198	3.2209	-0.403998	3.20373	-1.22717	-0.161014	0.783818	0.707434	-0.856254	-1.69722	-2.21284	0.77854	-3.38209	1.33903	-2.63355	0.219072	1.42104	5.21244			0.276178	-0.381752	-2.10963	-0.49399	-0.308742	-2.23761	3.93715	-0.101836	0.07273	-0.94479	0.809326	3.49696	5.63479	1.14587	-1.79113	1.84481	2.98434
1.2	3.19556	-0.393988	3.17538	-1.24345	-0.165242	0.751142	0.651504	-0.86324	-1.70027	-2.23306	0.777728	-3.35173	1.3284	-2.63544	0.224182	1.44981	5.21969			0.298004	-0.371588	-2.08954	-0.502782	-0.315462	-2.23587	3.92654	-0.061152	0.090916	-0.93898	0.817558	3.48645	5.63157	1.15905	-1.80218	1.9196	3.024
1.202	3.18885	-0.386456	3.15995	-1.24835	-0.160608	0.737226	0.648858	-0.89649	-1.69392	-2.2062	0.782096	-3.34811	1.27933	-2.61839	0.21378	1.49773	5.21143			0.308616	-0.366184	-2.09847	-0.507864	-0.317492	-2.23496	3.92139	-0.101892	0.093352	-0.951174	0.817544	3.49982	5.59525	1.14752	-1.81523	2.01701	3.12011
1.204	3.17205	-0.368298	3.21308	-1.2494	-0.1981	0.786604	0.643244	-0.900956	-1.67272	-2.21829	0.79772	-3.3126	1.26477	-2.60714	0.209202	1.50612	5.21611			0.346822	-0.330148	-2.13696	-0.50953	-0.323344	-2.25134	3.91832	-0.102788	0.115542	-0.957306	0.814856	3.50953	5.58019	1.13627	-1.80293	2.06462	3.15389
1.206	3.19355	-0.386386	3.20207	-1.24173	-0.191842	0.804524	0.633808	-0.879998	-1.69366	-2.21613	0.812602	-3.34634	1.29517	-2.60352	0.207214	1.5098	5.18386			0.397558	-0.315658	-2.1245	-0.505274	-0.343	-2.23325	3.91551	-0.09296	0.119504	-0.975898	0.814842	3.50984	5.63552	1.13877	-1.79318	2.07808	3.20426
1.208	3.20092	-0.422352	3.20891	-1.23358	-0.1981	0.792498	0.681674	-0.88438	-1.67773	-2.21621	0.814716	-3.36687	1.30054	-2.61386	0.220906	1.49048	5.18097			0.387492	-0.334096	-2.12327	-0.507388	-0.319676	-2.23626	3.92245	-0.132118	0.092274	-0.956382	0.814772	3.47437	5.63949	1.15653	-1.79521	2.03442	3.19252
1.21	3.19633	-0.416346	3.21345	-1.24214	-0.196854	0.761544	0.69097	-0.869204	-1.67117	-2.21729	0.815878	-3.43319	1.29753	-2.64383	0.214018	1.4882	5.12309			0.362124	-0.35182	-2.12131	-0.523404	-0.319802	-2.26253	3.91475	-0.08694	0.113484	-0.954548	0.803656	3.51893	5.68791	1.17043	-1.82283	2.01205	3.14612
1.212	3.20102	-0.39732	3.23603	-1.25472	-0.188202	0.76034	0.697228	-0.888356	-1.68899	-2.23713	0.817782	-3.44571	1.26801	-2.66342	0.215082	1.47017	5.14191			0.310758	-0.387184	-2.11448	-0.535024	-0.314356	-2.26783	3.95455	-0.08435	0.087948	-0.941556	0.801066	3.52549	5.72174	1.16803	-1.80634	1.99436	3.13163
1.214	3.2236	-0.406924	3.25045	-1.25756	-0.175784	0.730058	0.719124	-0.878584	-1.69107	-2.23538	0.818902	-3.45834	1.25234	-2.6726	0.225288	1.49639	5.15698			0.283682	-0.355656	-2.10116	-0.52388	-0.347158	-2.2577	3.97254	-0.082278	0.097188	-0.9429	0.796222	3.52337	5.76052	1.17652	-1.80449	2.03812	3.13873
1.216	3.24264	-0.4011	3.26596	-1.25322	-0.145628	0.746578	0.69993	-0.885206	-1.72306	-2.24647	0.807688	-3.45142	1.26046	-2.66773	0.232778	1.48824	5.17209			0.307748	-0.363314	-2.07928	-0.511616	-0.326032	-2.28166	3.98922	-0.114184	0.09254	-0.955444	0.802676	3.53459	5.72362	1.17529	-1.87139	2.05201	3.12624
1.218	3.24694	-0.392434	3.24467	-1.25587	-0.16737	0.75817	0.676466	-0.890848	-1.73177	-2.25044	0.800072	-3.42135	1.2382	-2.65867	0.212758	1.52377	5.1647			0.323246	-0.35427	-2.06342	-0.496706	-0.330526	-2.27392	3.99864	-0.114184	0.101668	-0.94542	0.803656	3.48866	5.67629	1.17496	-1.81348	2.13017	3.13445
1.22	3.2556	-0.397852	3.25336	-1.25089	-0.182448	0.75271	0.622216	-0.882364	-1.73502	-2.25289	0.791126	-3.39692	1.25973	-2.64088	0.201824	1.53985	5.15472			0.342426	-0.350154	-2.06849	-0.514528	-0.347508	-2.25499	4.0091	-0.106162	0.087374	-0.974274	0.81277	3.5142	5.66331	1.17047	-1.84898	2.21847	3.2121
1.222	3.24878	-0.38668	3.24009	-1.2419	-0.21126	0.764344	0.610372	-0.892808	-1.72248	-2.21976	0.795746	-3.39609	1.28768	-2.64396	0.186256	1.52922	5.13163			0.36645	-0.370692	-2.09023	-0.529368	-0.305074	-2.23766	4.01495	-0.094892	0.105126	-0.983164	0.822724	3.54095	5.69943	1.16059	-1.83761	2.27283	3.27908
1.224	3.19344	-0.385798	3.27998	-1.25378	-0.228466	0.783874	0.605374	-0.917056	-1.72848	-2.24836	0.799148	-3.42859	1.27907	-2.63759	0.179676	1.51939	5.10717			0.39487	-0.328622	-2.1446	-0.524426	-0.345296	-2.26418	4.01171	-0.097678	0.11935	-0.99498	0.82075	3.50963	5.7051	1.1513	-1.827	2.28393	3.33837
1.226	3.24797	-0.361424	3.26243	-1.25546	-0.22484	0.7518	0.63091	-0.904904	-1.70439	-2.25302	0.813694	-3.49091	1.28961	-2.66346	0.185976	1.49934	5.11413			0.398314	-0.323554	-2.12293	-0.517188	-0.352534	-2.28715	4.00719	-0.117726	0.116704	-0.993118	0.814814	3.52076	5.7624	1.17288	-1.83819	2.26869	3.36253
1.228	3.23414	-0.428274	3.28563	-1.2608	-0.207802	0.72996	0.674772	-0.90608	-1.69814	-2.26898	0.81102	-3.52576	1.27427	-2.68261	0.232414	1.48446	5.10859			0.426076	-0.325948	-2.14509	-0.525504	-0.349118	-2.31797	4.00506	-0.124712	0.120666	-1.00194	0.810768	3.50777	5.80635	1.19375	-1.86654	2.22932	3.32683
1.23	3.25536	-0.390614	3.32171	-1.27044	-0.187656	0.721448	0.693056	-0.908194	-1.69247	-2.26708	0.828968	-3.52541	1.26311	-2.70297	0.192612	1.53296	5.10762			0.388724	-0.35343	-2.12626	-0.541912	-0.324254	-2.32632	4.00068	-0.106666	0.100128	-0.980336	0.81025	3.49818	5.80859	1.18888	-1.84461	2.21067	3.27492
1.232	3.23564	-0.392588	3.33802	-1.27957	-0.173208	0.720174	0.677558	-0.905646	-1.70717	-2.2745	0.832776	-3.51124	1.24022	-2.71568	0.215978	1.57055	5.11617			0.353976	-0.373884	-2.15225	-0.540148	-0.307314	-2.31277	4.03393	-0.100954	0.094528	-0.964054	0.81515	3.49279	5.79744	1.19225	-1.8411	2.2287	3.26728
1.234	3.25455	-0.397782	3.30484	-1.27688	-0.179186	0.74781	0.696206	-0.887838	-1.73699	-2.27235	0.833882	-3.49523	1.22391	-2.70551	0.187292	1.57804	5.12056			0.345436	-0.378364	-2.10889	-0.534842	-0.32354	-2.28151	4.05825	-0.10402	0.096362	-0.984242	0.812252	3.46216	5.73489	1.19718	-1.89322	2.29762	3.38206
1.236	3.27481	-0.396228	3.32933	-1.26501	-0.203364	0.745304	0.68488	-0.8981	-1.73695	-2.28515	0.836906	-3.47203	1.24102	-2.69252	0.203336	1.57685	5.12973			0.388318	-0.375648	-2.06368	-0.524384	-0.337162	-2.28256	4.08922	-0.091868	0.095228	-0.985194	0.80787	3.50514	5.74448	1.19801	-1.8864	2.37835	3.28126
1.238	3.30889	-0.40355	3.32301	-1.25647	-0.223384	0.743666	0.667226	-0.920934	-1.74541	-2.28598	0.823494	-3.48012	1.2517	-2.67023	0.180376	1.5792	5.09305			0.393106	-0.390908	-2.0739	-0.523712	-0.335216	-2.29561	4.08642	-0.100604	0.09891	-0.979286	0.80332	3.52176	5.77237	1.18961	-1.86992	2.46637	3.37282
1.24	3.27844	-0.420644	3.3301	-1.26869	-0.240562	0.728812	0.61488	-0.903644	-1.7478	-2.28561	0.825846	-3.532	1.28346	-2.679	0.198548	1.53289	5.06549			0.40747	-0.366982	-2.06521	-0.526148	-0.328426	-2.32012	4.09538	-0.115514	0.082474	-0.989506	0.806638	3.51414	5.77347	1.18264	-1.90627	2.49285	3.44023
1.242	3.25972	-0.385112	3.33626	-1.27408	-0.229628	0.685846	0.600572	-0.891982	-1.75273	-2.29359	0.821632	-3.54227	1.25129	-2.68947	0.196616	1.49857	5.02674			0.42448	-0.361844	-2.09397	-0.530278	-0.327614	-2.34773	4.07415	-0.104846	0.136388	-1.05416	0.81074	3.50482	5.84807	1.19203	-1.88685	2.46694	3.51845
1.244	3.24408	-0.39571	3.34387	-1.28533	-0.207228	0.70091	0.602028	-0.926394	-1.72652	-2.29846	0.80948	-3.60129	1.24743	-2.71079	0.211568	1.49176	5.02865			0.452158	-0.32081	-2.14224	-0.536872	-0.313642	-2.34283	4.05976	-0.127218	0.10955	-1.03645	0.812518	3.51092	5.84123	1.20411	-1.87001	2.43387	3.52124
1.246	3.25746	-0.41979	3.32997	-1.28043	-0.196784	0.718326	0.64939	-0.915768	-1.72428	-2.29209	0.81347	-3.5898	1.22966	-2.73319	0.202776	1.54771	5.01955			0.457786	-0.345254	-2.12349	-0.531202	-0.321832	-2.32711	4.08565	-0.111062	0.106554	-1.01605	0.8211	3.49476	5.88846	1.21709	-1.84281	2.42876	3.43203
1.248	3.26012	-0.429548	3.36651	-1.2826	-0.181258	0.701022	0.678706	-0.917672	-1.71928	-2.29664	0.827834	-3.58996	1.21257	-2.74408	0.19817	1.55921	5.0114			0.457716	-0.38115	-2.13044	-0.541072	-0.326942	-2.31554	4.06869	-0.126476	0.092484	-1.00218	0.810698	3.48349	5.82732	1.22609	-1.87566	2.46191	3.4151
1.25	3.29405	-0.411152	3.39921	-1.27974	-0.179424	0.734398	0.674772	-0.904596	-1.74625	-2.3004	0.83874	-3.57749	1.18908	-2.74455	0.206612	1.56787	5.05809			0.444724	-0.389158	-2.12391	-0.555422	-0.332458	-2.31907	4.08218	-0.116564	0.092134	-0.988876	0.806428	3.47388	5.81416	1.23273	-1.88553	2.51132	3.44728
1.252	3.30207	-0.416486	3.40108	-1.27809	-0.199164	0.71078	0.662704	-0.889518	-1.75122	-2.30128	0.845838	-3.54697	1.21425	-2.72027	0.212898	1.54819	5.07675			0.419902	-0.346962	-2.10295	-0.574252	-0.344974	-2.31769	4.09594	-0.11228	0.082096	-0.990388	0.812056	3.48687	5.8207	1.22989	-1.92196	2.60488	3.43984
1.254	3.30631	-0.390418	3.39388	-1.28835	-0.21469	0.722764	0.669578	-0.91749	-1.78402	-2.30801	0.85183	-3.56496	1.24152	-2.71295	0.171822	1.55904	5.05366			0.425796	-0.367094	-2.08397	-0.575162	-0.333102	-2.33384	4.14793	-0.102998	0.080024	-1.01479	0.81578	3.49331	5.84658	1.21638	-1.89753	2.67491	3.43736
1.256	3.32074	-0.395654	3.39906	-1.28388	-0.231588	0.710234	0.652484	-0.902706	-1.78473	-2.30559	0.849744	-3.55719	1.21125	-2.71072	0.202594	1.51047	5.05298			0.4263	-0.356272	-2.04952	-0.545202	-0.33894	-2.34388	4.14777	-0.108668	0.099456	-1.02959	0.822528	3.49594	5.87969	1.21125	-1.93637	2.6767	3.50703
1.258	3.31908	-0.398272	3.40309	-1.28366	-0.213332	0.702198	0.600292	-0.907718	-1.77766	-2.30129	0.851018	-3.61882	1.2245	-2.73189	0.175658	1.50905	4.97991			0.441224	-0.348474	-2.05073	-0.5348	-0.34846	-2.36013	4.16451	-0.119882	0.09884	-1.05134	0.81543	3.48642	5.89551	1.22562	-1.87879	2.64789	3.6101
1.26	3.32837	-0.424172	3.39006	-1.28988	-0.21308	0.679392	0.59409	-0.920752	-1.78819	-2.3059	0.845642	-3.66517	1.20644	-2.75821	0.20314	1.523	4.95989			0.449722	-0.3647	-2.04576	-0.535374	-0.34622	-2.33519	4.15895	-0.105434	0.10906	-1.04929	0.813946	3.47619	5.93125	1.23259	-1.9173	2.60392	3.65131
1.262	3.31519	-0.37289	3.3871	-1.29864	-0.19579	0.71568	0.58121	-0.919184	-1.80194	-2.31385	0.848204	-3.66822	1.20985	-2.77773	0.202048	1.54507	4.9553			0.449862	-0.318472	-2.08036	-0.54236	-0.316442	-2.35204	4.15327	-0.104664	0.10108	-1.04847	0.817208	3.47969	5.95708	1.24837	-1.89938	2.63369	3.64172
1.264	3.2888	-0.401324	3.3794	-1.29521	-0.186928	0.718396	0.598234	-0.916174	-1.76098	-2.33535	0.833812	-3.68061	1.19161	-2.79356	0.197848	1.54938	4.96779			0.440608	-0.306264	-2.10783	-0.55678	-0.30604	-2.33104	4.15465	-0.122332	0.11613	-1.04835	0.817712	3.47543	5.88634	1.25283	-1.91068	2.66864	3.60445
1.266	3.29246	-0.420616	3.39338	-1.28279	-0.198702	0.749994	0.648942	-0.933996	-1.76821	-2.32324	0.832622	-3.66239	1.19914	-2.7832	0.17983	1.53455	4.95348			0.478338	-0.335468	-2.10477	-0.550704	-0.329672	-2.32007	4.146	-0.132748	0.087178	-1.0403	0.820386	3.46679	5.87202	1.25811	-1.94113	2.74604	3.54042
1.268	3.32007	-0.405776	3.42892	-1.28337	-0.199724	0.72114	0.670768	-0.913962	-1.78199	-2.34578	0.827554	-3.6338	1.21058	-2.76636	0.188244	1.51425	4.98877			0.4564	-0.380814	-2.08228	-0.55573	-0.343518	-2.33765	4.16914	-0.128506	0.05383	-1.03501	0.825916	3.46954	5.87961	1.24775	-1.93294	2.81807	3.57022
1.27	3.34733	-0.421106	3.45519	-1.28341	-0.218946	0.673246	0.68012	-0.924042	-1.75675	-2.34968	0.838404	-3.64717	1.21132	-2.75899	0.182574	1.49695	4.99398			0.425558	-0.401996	-2.07882	-0.563108	-0.32732	-2.38064	4.18482	-0.129738	0.098	-1.0326	0.825146	3.48739	5.8974	1.24886	-1.93409	2.88673	3.56678
1.272	3.3494	-0.399938	3.43294	-1.30197	-0.21868	0.675136	0.669494	-0.920962	-1.77549	-2.34343	0.849534	-3.67293	1.19703	-2.75573	0.145138	1.48803	4.98781			0.44478	-0.403396	-2.09427	-0.566356	-0.353738	-2.38416	4.20647	-0.115934	0.096502	-1.01664	0.82369	3.48289	5.92977	1.23402	-1.92164	2.89156	3.6148
1.274	3.3515	-0.404222	3.44448	-1.31176	-0.226226	0.679308	0.66983	-0.910644	-1.81241	-2.3595	0.861966	-3.72016	1.17603	-2.76578	0.16604	1.45523	4.90272			0.438214	-0.395318	-2.04954	-0.577262	-0.347382	-2.37513	4.21408	-0.093478	0.085498	-1.05557	0.820442	3.50011	5.9747	1.23829	-1.92627	2.87385	3.75311
1.276	3.36213	-0.387632	3.4704	-1.30189	-0.221998	0.727972	0.63259	-0.921928	-1.80576	-2.34566	0.871094	-3.76165	1.1545	-2.78603	0.184576	1.47886	4.93044			0.45017	-0.358848	-2.02486	-0.561274	-0.34811	-2.40318	4.2401	-0.114646	0.101136	-1.05155	0.821352	3.48722	5.99021	1.2501	-1.92426	2.83885	3.74153
1.278	3.36396	-0.407582	3.47606	-1.2983	-0.231868	0.747026	0.60004	-0.939414	-1.79647	-2.34188	0.877492	-3.75404	1.12605	-2.80574	0.180082	1.51934	4.87201			0.448826	-0.377734	-2.01543	-0.548702	-0.320978	-2.38218	4.22297	-0.12698	0.094346	-1.05893	0.826112	3.48352	6.00036	1.26571	-1.91932	2.85331	3.79478
1.28	3.36412	-0.400022	3.47729	-1.29345	-0.19831	0.75747	0.584304	-0.940996	-1.79715	-2.36338	0.875392	-3.76523	1.14163	-2.82015	0.191254	1.50706	4.79098			0.46011	-0.347648	-2.02628	-0.5551	-0.326522	-2.38375	4.23368	-0.132412	0.089768	-1.06285	0.82215	3.47936	5.95624	1.2797	-1.95737	2.87661	3.89497
1.282	3.34638	-0.44002	3.47378	-1.29613	-0.200088	0.726642	0.582876	-0.924728	-1.78938	-2.3683	0.88088	-3.72399	1.15611	-2.82146	0.19894	1.46868	4.86412			0.50659	-0.345828	-2.07326	-0.563668	-0.32046	-2.38862	4.19875	-0.115542	0.11473	-1.06645	0.819686	3.48137	5.93456	1.28351	-1.9628	2.95729	3.72289
1.284	3.32601	-0.43127	3.45236	-1.29956	-0.203378	0.705852	0.621068	-0.934122	-1.7751	-2.38074	0.872984	-3.70404	1.1702	-2.8189	0.157094	1.46117	4.84964			0.51793	-0.361732	-2.1054	-0.563892	-0.32823	-2.38388	4.19387	-0.115122	0.10612	-1.05564	0.81382	3.47031	5.94096	1.28988	-1.96911	3.03916	3.6779
1.286	3.3215	-0.427154	3.48459	-1.30452	-0.212828	0.694316	0.681842	-0.94703	-1.79544	-2.35687	0.867202	-3.68606	1.16885	-2.79713	0.184142	1.45036	4.85976			0.505442	-0.382382	-2.07578	-0.575792	-0.341544	-2.39732	4.2105	-0.121198	0.077042	-1.04958	0.814856	3.50609	5.97114	1.28542	-1.96258	3.09312	3.8549
1.288	3.35084	-0.398608	3.52881	-1.31265	-0.237426	0.711242	0.69566	-0.939526	-1.7831	-2.3774	0.85484	-3.73348	1.1451	-2.78961	0.18375	1.41399	4.92064			0.497742	-0.399798	-2.07819	-0.573832	-0.356636	-2.41121	4.22057	-0.12187	0.081004	-1.03933	0.807492	3.48709	5.98742	1.27266	-1.99021	3.14009	3.71976
1.29	3.38006	-0.40061	3.56112	-1.31187	-0.23576	0.696724	0.690312	-0.936376	-1.80932	-2.33807	0.8519	-3.80598	1.1066	-2.79111	0.169806	1.41571	4.92759			0.449134	-0.396004	-2.06087	-0.567714	-0.327684	-2.39385	4.24346	-0.135156	0.063252	-1.04185	0.817754	3.49087	6.03733	1.25622	-1.99965	3.09666	3.78325
1.292	3.39613	-0.400484	3.52652	-1.31347	-0.2324	0.712138	0.672812	-0.928648	-1.84183	-2.37856	0.85918	-3.82626	1.07632	-2.80441	0.17304	1.42474	4.86626			0.459396	-0.390166	-2.04956	-0.58226	-0.340312	-2.38357	4.25877	-0.120372	0.085624	-1.06609	0.82264	3.47333	6.05926	1.27914	-1.95773	3.06125	3.81539
1.294	3.40578	-0.410228	3.53129	-1.31032	-0.231574	0.720986	0.620578	-0.928788	-1.83603	-2.37045	0.861434	-3.82393	1.07404	-2.82394	0.160608	1.44564	4.86188			0.473522	-0.39326	-2.01013	-0.591234	-0.339066	-2.39124	4.30275	-0.116774	0.083748	-1.05252	0.823214	3.48009	6.05213	1.29504	-1.99448	3.06687	3.90358
1.296	3.41351	-0.393596	3.53605	-1.30731	-0.220052	0.703892	0.570906	-0.938098	-1.84094	-2.38832	0.8708	-3.84058	1.10298	-2.8453	0.176106	1.44322	4.79837			0.486234	-0.385868	-2.02962	-0.578466	-0.334782	-2.40383	4.30588	-0.116494	0.081004	-1.07873	0.819084	3.45029	6.02241	1.3147	-1.99119	3.083	3.95114
1.298	3.42467	-0.409668	3.53006	-1.30991	-0.220864	0.713328	0.58975	-0.951524	-1.82974	-2.40927	0.893928	-3.80719	1.13095	-2.85859	0.160818	1.41901	4.82752			0.488152	-0.364252	-2.01522	-0.571578	-0.315714	-2.40881	4.32743	-0.13258	0.100856	-1.09705	0.821324	3.43426	6.02486	1.32758	-1.97694	3.12785	3.91028
1.3	3.41541	-0.44338	3.51089	-1.31314	-0.21987	0.699356	0.563556	-0.94654	-1.83317	-2.38171	0.897834	-3.79071	1.12514	-2.85495	0.15855	1.37796	4.78351			0.494298	-0.4046	-2.02518	-0.554526	-0.336294	-2.41706	4.29934	-0.124166	0.103516	-1.0843	0.82572	3.46018	6.01136	1.32695	-1.97973	3.20551	3.80542
1.302	3.41271	-0.439278	3.53174	-1.33153	-0.211806	0.707658	0.605836	-0.939092	-1.85038	-2.41083	0.902328	-3.77485	1.11345	-2.83433	0.169792	1.3648	4.84432			0.518826	-0.380422	-2.05982	-0.554582	-0.342118	-2.42809	4.28558	-0.140882	0.067956	-1.08723	0.830046	3.47523	6.01397	1.3153	-2.01447	3.29358	3.81073
1.304	3.39011	-0.429478	3.52874	-1.3274	-0.229502	0.678552	0.655284	-0.948556	-1.80342	-2.42353	0.902034	-3.80114	1.07594	-2.82212	0.124936	1.33029	4.8536			0.526708	-0.37772	-2.06524	-0.564508	-0.364896	-2.40961	4.27696	-0.100786	0.094542	-1.10975	0.82383	3.47362	6.04187	1.30346	-2.00075	3.34631	3.82864
1.306	3.3921	-0.426202	3.54792	-1.32817	-0.236376	0.658252	0.677418	-0.939036	-1.8167	-2.40537	0.910826	-3.8537	1.05466	-2.83112	0.132902	1.30855	4.86917			0.516992	-0.396816	-2.04961	-0.574952	-0.348992	-2.3948	4.30987	-0.07385	0.053396	-1.06485	0.814842	3.45174	6.05724	1.29825	-1.98278	3.32737	3.84042
1.308	3.37028	-0.414708	3.58179	-1.31859	-0.242886	0.690592	0.684502	-0.9485	-1.84258	-2.40377	0.894306	-3.87653	1.0466	-2.83669	0.154742	1.33172	4.8452			0.555198	-0.402752	-2.02633	-0.57484	-0.352744	-2.43277	4.32713	-0.108682	0.053438	-1.05634	0.811874	3.47269	6.1097	1.30995	-1.99143	3.31055	3.88065
1.31	3.38477	-0.428148	3.60654	-1.30915	-0.232078	0.69664	0.698404	-0.959532	-1.85734	-2.40498	0.893046	-3.9284	1.05059	-2.85844	0.178178	1.36123	4.80682			0.540792	-0.397194	-2.00222	-0.585886	-0.347816	-2.42087	4.33895	-0.119602	0.059136	-1.06596	0.81039	3.44947	6.09882	1.33018	-1.99689	3.29018	3.98209
1.312	3.40799	-0.430024	3.58233	-1.31338	-0.214438	0.700672	0.68222	-0.947058	-1.89154	-2.40481	0.88949	-3.91454	1.06078	-2.87881	0.167328	1.33951	4.74319			0.529214	-0.394212	-1.97544	-0.596764	-0.345562	-2.42946	4.33454	-0.1456	0.0315	-1.09736	0.818622	3.45017	6.05612	1.33182	-1.9973	3.28208	3.99395
1.314	3.44322	-0.393596	3.61735	-1.32937	-0.223482	0.672308	0.644112	-0.940058	-1.84877	-2.40094	0.883232	-3.88391	1.08328	-2.8868	0.14952	1.3145	4.76757			0.510384	-0.381346	-1.94158	-0.604492	-0.325052	-2.43534	4.35361	-0.127232	0.066598	-1.10883	0.823116	3.44063	6.08608	1.34523	-2.03312	3.3131	3.99265
1.316	3.44462	-0.38675	3.62671	-1.34056	-0.2247	0.671286	0.629412	-0.936866	-1.85707	-2.41548	0.884716	-3.85822	1.0733	-2.88098	0.16464	1.29623	4.79681			0.528472	-0.348418	-1.95416	-0.590954	-0.334068	-2.44245	4.36089	-0.139118	0.08967	-1.13169	0.824334	3.44092	6.10149	1.35253	-2.02649	3.36374	3.96221
1.318	3.43234	-0.444682	3.59576	-1.33206	-0.218442	0.66983	0.611338	-0.948962	-1.87384	-2.42232	0.89068	-3.85172	1.01444	-2.87214	0.162232	1.2656	4.74684			0.547064	-0.353052	-1.96153	-0.578998	-0.341726	-2.4558	4.35341	-0.115248	0.097328	-1.13418	0.825916	3.46312	6.06063	1.34119	-2.04165	3.45537	3.90447
1.32	3.43671	-0.436688	3.60221	-1.32629	-0.213402	0.660688	0.62321	-0.960106	-1.86028	-2.43218	0.902412	-3.89747	1.00087	-2.85741	0.15302	1.25352	4.69818			0.564032	-0.371686	-1.98191	-0.577318	-0.353514	-2.45178	4.36944	-0.15589	0.081172	-1.12708	0.820946	3.45747	6.08867	1.3347	-2.0406	3.53366	4.14485
1.322	3.43473	-0.427336	3.60562	-1.32713	-0.203182	0.660758	0.644644	-0.956032	-1.84829	-2.4366	0.918092	-3.92914	0.99743	-2.85628	0.165788	1.22549	4.80106			0.582148	-0.409276	-2.02558	-0.580342	-0.359478	-2.44927	4.34777	-0.141792	0.080962	-1.11076	0.819406	3.4509	6.11321	1.32479	-2.0449	3.5559	3.96941
1.324	3.41431	-0.43337	3.59183	-1.33398	-0.214284	0.638918	0.664034	-0.963046	-1.85105	-2.43695	0.92309	-3.93924	1.02939	-2.8625	0.16534	1.21302	4.78477			0.58051	-0.405818	-2.0265	-0.591304	-0.337554	-2.45164	4.34321	-0.13314	0.081522	-1.11829	0.823774	3.46892	6.14165	1.32413	-2.03491	3.52934	3.96522
1.326	3.41705	-0.430556	3.609	-1.33153	-0.208194	0.684446	0.659624	-0.96355	-1.87211	-2.44572	0.917406	-3.99755	1.06637	-2.88095	0.148988	1.20144	4.74842			0.600614	-0.398174	-1.99797	-0.584192	-0.34811	-2.47198	4.36801	-0.094206	0.068446	-1.10383	0.816438	3.43073	6.17918	1.34774	-2.04365	3.5335	4.05255
1.328	3.42719	-0.417326	3.64235	-1.33727	-0.224434	0.707196	0.668038	-0.96446	-1.86871	-2.4325	0.926744	-4.01384	1.06859	-2.89807	0.1358	1.2192	4.65426			0.589862	-0.39802	-1.993	-0.580776	-0.358274	-2.44881	4.4182	-0.075978	0.065982	-1.10475	0.820568	3.40841	6.17743	1.36067	-2.02632	3.51572	4.28509
1.33	3.39872	-0.452298	3.63493	-1.33524	-0.232736	0.674828	0.690774	-0.978194	-1.89631	-2.42815	0.918778	-3.97768	1.03982	-2.91558	0.160496	1.24359	4.64964			0.604492	-0.395388	-1.9713	-0.57582	-0.356384	-2.46681	4.44007	-0.117306	0.084798	-1.10706	0.810712	3.40785	6.16176	1.38278	-2.04803	3.50462	4.15468
1.332	3.43487	-0.42763	3.64349	-1.34175	-0.202552	0.647626	0.645876	-0.952378	-1.9013	-2.42598	0.920962	-3.95311	0.998312	-2.92278	0.174314	1.24512	4.73005			0.584094	-0.38773	-1.92699	-0.598976	-0.348124	-2.48734	4.43722	-0.135506	0.066136	-1.13413	0.815318	3.39658	6.1311	1.38704	-2.07567	3.51121	4.1076
1.334	3.4342	-0.403494	3.66324	-1.35211	-0.203952	0.617442	0.637112	-0.945	-1.88726	-2.43781	0.906822	-3.94611	0.962206	-2.90815	0.187964	1.19606	4.69473			0.5908	-0.367332	-1.91374	-0.599858	-0.337484	-2.49605	4.44153	-0.160986	0.102494	-1.1681	0.813232	3.43718	6.12605	1.37469	-2.06244	3.56005	4.01771
1.336	3.43557	-0.44149	3.66212	-1.35296	-0.223048	0.643426	0.609658	-0.951272	-1.89843	-2.44098	0.896882	-3.92785	1.00439	-2.88819	0.180152	1.1676	4.70544			0.563822	-0.356608	-1.92378	-0.61565	-0.325612	-2.48447	4.43363	-0.168644	0.093128	-1.14325	0.819826	3.43854	6.14967	1.36507	-2.05041	3.64645	4.04151
1.338	3.47218	-0.442148	3.67109	-1.34441	-0.211456	0.677166	0.606354	-0.944958	-1.87659	-2.45603	0.90377	-4.0087	1.03516	-2.88558	0.14588	1.10435	4.7607			0.572278	-0.380212	-1.9363	-0.610834	-0.34251	-2.50404	4.42537	-0.14959	0.101836	-1.14769	0.816928	3.43195	6.18853	1.35972	-2.06571	3.7255	4.05896
1.34	3.5119	-0.456064	3.64762	-1.34413	-0.215362	0.703668	0.62356	-0.961408	-1.85739	-2.4563	0.910294	-4.05531	1.0446	-2.89212	0.142338	1.07758	4.71947			0.578298	-0.390936	-1.9718	-0.606074	-0.36218	-2.50351	4.41822	-0.136052	0.083524	-1.12519	0.822976	3.41981	6.20217	1.3561	-2.08121	3.75536	4.14357
1.342	3.47789	-0.44275	3.65929	-1.34845	-0.233716	0.711676	0.618506	-0.978796	-1.88737	-2.44607	0.920304	-4.08446	1.00801	-2.90118	0.120316	1.06494	4.70604			0.56602	-0.40299	-2.00033	-0.600922	-0.342566	-2.51185	4.44269	-0.1512	0.064834	-1.14569	0.819392	3.40663	6.25066	1.37344	-2.0551	3.73097	4.10029
1.344	3.47031	-0.42826	3.67655	-1.34905	-0.23086	0.693644	0.63357	-0.98875	-1.88129	-2.44614	0.935872	-4.00662	0.996856	-2.93128	0.157598	1.05514	4.68271			0.556864	-0.382438	-1.98915	-0.586236	-0.354844	-2.53569	4.42149	-0.10157	0.069412	-1.13481	0.816046	3.41764	6.22994	1.40818	-2.05023	3.70366	4.1785
1.346	3.45171	-0.45171	3.69702	-1.36559	-0.225246	0.6727	0.638512	-0.96341	-1.91108	-2.46743	0.933996	-4.02199	0.958566	-2.95046	0.173824	1.09131	4.63709			0.593488	-0.409794	-1.96391	-0.597758	-0.351694	-2.51544	4.42998	-0.087934	0.039018	-1.14174	0.8197	3.40515	6.2182	1.41121	-2.08132	3.71356	4.24743
1.348	3.48816	-0.436058	3.66877	-1.35751	-0.252406	0.651448	0.684376	-0.960778	-1.8997	-2.4753	0.951538	-4.01041	0.946596	-2.9416	0.18431	1.0988	4.6503			0.593586	-0.392518	-1.95552	-0.59934	-0.34741	-2.50086	4.45406	-0.091098	0.07259	-1.15907	0.817096	3.38596	6.17224	1.42076	-2.07126	3.71802	4.24234
1.35	3.49847	-0.447608	3.68318	-1.35856	-0.244272	0.667058	0.699286	-0.980112	-1.92835	-2.47251	0.956116	-3.9989	0.96152	-2.92503	0.163254	1.05189	4.4749			0.567378	-0.39298	-1.91044	-0.603078	-0.364616	-2.53575	4.48248	-0.11879	0.073668	-1.15844	0.824852	3.42805	6.15334	1.41448	-2.048	3.8354	4.3983
1.352	3.5167	-0.433356	3.68298	-1.35073	-0.22687	0.667968	0.709604	-0.974218	-1.92398	-2.47248	0.96628	-4.02189	1.00759	-2.92536	0.17416	1.0248	4.58843			0.581014	-0.385854	-1.8968	-0.611646	-0.325024	-2.5465	4.48234	-0.163786	0.083622	-1.16311	0.819392	3.41649	6.21575	1.40743	-2.08824	3.79858	4.21715
1.354	3.50605	-0.43211	3.70513	-1.34918	-0.221648	0.667478	0.675458	-0.97545	-1.92765	-2.49392	0.952126	-4.06742	1.024	-2.92932	0.143724	0.979146	4.62328			0.569842	-0.381612	-1.90334	-0.62391	-0.32564	-2.53618	4.513	-0.167706	0.085652	-1.14866	0.81158	3.40257	6.25132	1.39457	-2.05618	3.87699	4.31255
1.356	3.52096	-0.429016	3.69027	-1.36686	-0.210042	0.66283	0.637994	-0.977802	-1.92165	-2.48888	0.942242	-4.10098	0.981512	-2.92774	0.143962	0.921312	4.6839			0.57974	-0.375298	-1.88145	-0.625436	-0.328356	-2.54425	4.4987	-0.15162	0.07119	-1.16824	0.810236	3.40908	6.28071	1.39622	-2.07582	3.93065	4.22365
1.358	3.5195	-0.438046	3.6909	-1.36913	-0.204708	0.6552	0.6153	-0.973112	-1.90299	-2.49315	0.929922	-4.14744	0.968912	-2.93439	0.139566	0.919478	4.65914			0.585508	-0.391776	-1.90553	-0.6265	-0.361256	-2.55333	4.51259	-0.145866	0.076342	-1.15048	0.8092	3.38449	6.31375	1.41235	-2.04218	3.89546	4.17962
1.36	3.55173	-0.43981	3.71783	-1.36455	-0.225162	0.654906	0.623504	-0.98616	-1.93214	-2.49642	0.921844	-4.13865	0.928788	-2.94864	0.174426	0.925428	4.60835			0.583954	-0.428218	-1.94151	-0.60963	-0.367346	-2.54891	4.51007	-0.126994	0.04634	-1.15167	0.822304	3.39879	6.32982	1.42089	-2.0799	3.89389	4.25883
1.362	3.54845	-0.461972	3.71784	-1.36275	-0.238686	0.652568	0.639296	-0.9891	-1.92531	-2.50456	0.915488	-4.1278	0.947814	-2.96789	0.174608	0.941066	4.57496			0.599942	-0.406238	-1.93781	-0.607936	-0.351806	-2.58224	4.49688	-0.114548	0.053102	-1.14349	0.81557	3.3994	6.29426	1.44228	-2.08463	3.87254	4.32443
1.364	3.53325	-0.436828	3.71203	-1.37381	-0.256004	0.628712	0.702394	-0.99302	-1.96591	-2.51885	0.928984	-4.10973	0.908978	-2.97188	0.153538	0.959042	4.55417			0.614586	-0.420406	-1.9166	-0.604072	-0.345408	-2.55147	4.48452	-0.091798	0.075166	-1.15529	0.823466	3.3881	6.27795	1.44879	-2.08522	3.87696	4.33833
1.366	3.52789	-0.436562	3.76803	-1.36515	-0.241934	0.587762	0.728896	-0.977522	-1.94967	-2.50604	0.946526	-4.05094	0.927346	-2.96166	0.149338	0.911862	4.56173			0.633962	-0.402738	-1.90476	-0.60606	-0.33418	-2.5599	4.48879	-0.12103	0.048454	-1.16074	0.816368	3.42248	6.26256	1.43993	-2.09637	3.88202	4.3126
1.368	3.50526	-0.454594	3.75481	-1.35828	-0.239428	0.60487	0.735504	-0.98301	-1.93028	-2.50452	0.957824	-4.0836	0.956354	-2.94636	0.158704	0.89369	4.548			0.640038	-0.431116	-1.91468	-0.617876	-0.365344	-2.55622	4.51125	-0.1316	0.10171	-1.16516	0.816704	3.40687	6.26506	1.4363	-2.10497	3.9507	4.19318
1.37	3.51075	-0.416822	3.74325	-1.35706	-0.23968	0.620676	0.735112	-0.998242	-1.95023	-2.50379	0.97482	-4.1383	0.953148	-2.94801	0.157794	0.836528	4.43177			0.64295	-0.408492	-1.88783	-0.624358	-0.385588	-2.54185	4.5304	-0.151326	0.07973	-1.18023	0.818874	3.39268	6.26861	1.43619	-2.12153	4.0147	4.48932
1.372	3.54126	-0.425474	3.72879	-1.37074	-0.229348	0.66192	0.691684	-0.988218	-1.93057	-2.51059	0.979846	-4.19094	0.919492	-2.94874	0.157178	0.815444	4.61572			0.635278	-0.351078	-1.85276	-0.635236	-0.33362	-2.57174	4.57691	-0.167692	0.107814	-1.19115	0.819448	3.39774	6.37323	1.43611	-2.07455	4.07289	4.26833
1.374	3.54962	-0.451472	3.73852	-1.37673	-0.225876	0.625996	0.660422	-0.982814	-1.93939	-2.5047	0.9828	-4.22992	0.876638	-2.97128	0.16744	0.792904	4.59141			0.603946	-0.397754	-1.84593	-0.633066	-0.348278	-2.57727	4.5708	-0.159698	0.078344	-1.1908	0.819	3.39322	6.39323	1.45496	-2.12079	4.06848	4.30105
1.376	3.56572	-0.458976	3.73611	-1.38544	-0.212828	0.621488	0.64288	-0.973952	-1.95401	-2.5368	0.984228	-4.22083	0.854224	-2.98761	0.150906	0.807632	4.55361			0.608174	-0.410074	-1.87155	-0.638022	-0.345954	-2.59346	4.55686	-0.141442	0.064316	-1.17572	0.809564	3.38733	6.40109	1.46409	-2.11084	4.06987	4.33353
1.378	3.57214	-0.441518	3.73906	-1.38383	-0.225498	0.597912	0.61439	-0.986566	-1.94309	-2.56428	0.98679	-4.21779	0.872382	-3.00362	0.146118	0.78736	4.52633			0.607628	-0.4361	-1.85938	-0.637042	-0.350868	-2.59825	4.56592	-0.123326	0.075964	-1.18488	0.816438	3.37551	6.30959	1.48155	-2.08442	4.0679	4.40206
1.38	3.59474	-0.452984	3.74291	-1.38249	-0.233198	0.569772	0.641914	-0.98175	-1.94459	-2.55382	0.980868	-4.18691	0.875448	-2.99631	0.16933	0.820344	4.46502			0.60025	-0.411446	-1.88618	-0.62216	-0.360458	-2.60611	4.57507	-0.126728	0.082754	-1.16578	0.81921	3.37238	6.311	1.48238	-2.12519	4.0378	4.47903
1.382	3.5751	-0.452284	3.79624	-1.37761	-0.243642	0.6013	0.669872	-0.98252	-1.97316	-2.55003	0.972006	-4.19341	0.879214	-2.98631	0.16478	0.83559	4.45894			0.621572	-0.423752	-1.90039	-0.61201	-0.36428	-2.60392	4.56592	-0.129556	0.075152	-1.16017	0.808122	3.39237	6.30099	1.48114	-2.10711	4.05446	4.45361
1.384	3.58151	-0.44989	3.78664	-1.38576	-0.214382	0.600292	0.713314	-1.00415	-1.98594	-2.56712	0.954688	-4.18282	0.897834	-2.96435	0.150878	0.818776	4.47847			0.649544	-0.411194	-1.90781	-0.628068	-0.35784	-2.62619	4.54559	-0.137998	0.099988	-1.16592	0.819322	3.40502	6.32778	1.45846	-2.097	4.05574	4.3968
1.386	3.6129	-0.469742	3.79176	-1.3963	-0.229292	0.60256	0.739312	-0.994518	-1.97873	-2.55496	0.95403	-4.2477	0.876246	-2.96818	0.16401	0.751352	4.48909			0.676438	-0.42574	-1.88544	-0.63868	-0.356958	-2.6171	4.57135	-0.135394	0.10206	-1.1681	0.820624	3.38496	6.34991	1.45293	-2.15004	4.09658	4.35109
1.388	3.56791	-0.455098	3.81235	-1.39531	-0.230846	0.651644	0.724962	-1.0053	-1.95392	-2.54911	0.968422	-4.26899	0.853132	-2.97086	0.137326	0.690732	4.52673			0.695506	-0.399322	-1.88339	-0.63644	-0.334824	-2.59399	4.6045	-0.107506	0.108416	-1.22254	0.817712	3.37739	6.40142	1.46307	-2.10729	4.14464	4.37073
1.39	3.57169	-0.431942	3.7982	-1.39982	-0.233716	0.639814	0.690088	-0.980784	-1.95299	-2.58159	0.965482	-4.31596	0.84392	-2.98883	0.137564	0.648088	4.52203			0.673134	-0.414218	-1.87179	-0.631904	-0.331898	-2.6082	4.66011	-0.122332	0.096292	-1.20469	0.812728	3.3819	6.40528	1.49323	-2.12026	4.23256	4.38833
1.392	3.5614	-0.447468	3.79845	-1.3963	-0.248864	0.593404	0.64225	-0.998508	-1.96795	-2.55256	1.0004	-4.32531	0.83118	-3.00262	0.15267	0.5768	4.51612			0.656558	-0.390642	-1.86073	-0.632534	-0.344624	-2.6178	4.64643	-0.170296	0.056322	-1.20771	0.82068	3.3672	6.42929	1.52319	-2.12864	4.24774	4.4266
1.394	3.59839	-0.468958	3.79578	-1.38936	-0.239848	0.536816	0.615552	-1.01318	-1.9896	-2.58447	0.999222	-4.31087	0.81319	-3.01588	0.162484	0.572362	4.46149			0.624834	-0.418334	-1.84962	-0.641116	-0.35728	-2.63752	4.63611	-0.157514	0.056476	-1.19329	0.823494	3.34768	6.42389	1.53073	-2.12167	4.2313	4.46982
1.396	3.62418	-0.470414	3.79855	-1.39873	-0.225974	0.56091	0.569534	-1.01472	-1.97558	-2.59052	1.00206	-4.28491	0.806638	-3.03086	0.148064	0.549528	4.42817			0.623756	-0.397138	-1.84898	-0.666526	-0.370804	-2.63071	4.63774	-0.140014	0.056448	-1.19644	0.824838	3.35784	6.39031	1.52719	-2.15033	4.2083	4.54252
1.398	3.62144	-0.479612	3.79375	-1.39054	-0.227654	0.589078	0.589106	-1.0016	-2.01368	-2.60222	1.01445	-4.2618	0.814674	-3.02861	0.152768	0.569492	4.37636			0.610918	-0.423038	-1.8577	-0.657272	-0.355628	-2.62815	4.62399	-0.139272	0.056392	-1.18908	0.818258	3.3626	6.36293	1.52404	-2.12845	4.17141	4.56977
1.4	3.65747	-0.477582	3.81163	-1.39867	-0.246358	0.633416	0.646324	-0.99666	-1.99133	-2.60588	1.00646	-4.26653	0.828366	-3.00909	0.157094	0.632506	4.39383			0.624512	-0.420252	-1.86204	-0.641606	-0.375396	-2.63277	4.60972	-0.142408	0.074368	-1.19622	0.813526	3.37659	6.36415	1.51732	-2.14519	4.17784	4.54537
1.402	3.67199	-0.468314	3.82133	-1.40739	-0.260778	0.614362	0.692818	-0.998592	-2.01508	-2.61251	0.99176	-4.29036	0.851452	-2.99478	0.16576	0.625366	4.4045			0.629524	-0.424788	-1.87726	-0.621278	-0.359212	-2.6483	4.61772	-0.148904	0.097622	-1.20638	0.815234	3.35541	6.38481	1.51773	-2.12989	4.23184	4.47475
1.404	3.67604	-0.456638	3.8283	-1.41786	-0.265202	0.623504	0.714056	-1.00363	-2.01342	-2.60103	0.995372	-4.322	0.830522	-3.00241	0.158088	0.564368	4.40441			0.650272	-0.438424	-1.87291	-0.629132	-0.35504	-2.64785	4.62463	-0.135618	0.106148	-1.19346	0.813484	3.36375	6.42085	1.51347	-2.13044	4.26202	4.44962
1.406	3.66626	-0.45206	3.82423	-1.41329	-0.224476	0.611338	0.700546	-1.00461	-1.99508	-2.60774	0.982842	-4.34715	0.82292	-3.00062	0.146426	0.486444	4.45417			0.64428	-0.416276	-1.86229	-0.64582	-0.3598	-2.65586	4.66281	-0.148652	0.079366	-1.23889	0.810082	3.34447	6.4602	1.51518	-2.17533	4.31885	4.5058
1.408	3.68659	-0.456974	3.87502	-1.41303	-0.241962	0.594356	0.694092	-0.999544	-1.97667	-2.62774	0.973322	-4.37678	0.811202	-3.02459	0.144718	0.386232	4.39814			0.686672	-0.395948	-1.85774	-0.659064	-0.341712	-2.6787	4.6906	-0.139286	0.072324	-1.23242	0.824628	3.32513	6.46071	1.54455	-2.17519	4.36362	4.57934
1.41	3.62293	-0.441546	3.88615	-1.40241	-0.242018	0.587076	0.665014	-1.00279	-1.98344	-2.5937	0.981358	-4.33503	0.787612	-3.03796	0.160692	0.364826	4.45418			0.683578	-0.334264	-1.84467	-0.672084	-0.34587	-2.64008	4.70194	-0.149534	0.073346	-1.24806	0.828618	3.32357	6.50325	1.57129	-2.16611	4.31466	4.56226
1.412	3.62464	-0.485058	3.8883	-1.40608	-0.246834	0.593894	0.643944	-0.993552	-1.97172	-2.62112	0.98777	-4.33397	0.82663	-3.0513	0.193928	0.384258	4.37128			0.684656	-0.38304	-1.84236	-0.659022	-0.35798	-2.6364	4.7089	-0.162036	0.059402	-1.21444	0.820456	3.30488	6.47514	1.57681	-2.17202	4.34972	4.59546
1.414	3.66359	-0.487508	3.87181	-1.41571	-0.248556	0.59381	0.636384	-1.02124	-2.02195	-2.628	1.00353	-4.33061	0.822136	-3.0499	0.164122	0.39781	4.33658			0.640472	-0.394156	-1.85647	-0.655816	-0.363048	-2.65212	4.70513	-0.191646	0.07693	-1.19965	0.828016	3.34499	6.46412	1.5829	-2.19682	4.3042	4.66012
1.416	3.68787	-0.483	3.85584	-1.4244	-0.245336	0.583982	0.58646	-1.02921	-2.03162	-2.63469	1.02368	-4.35316	0.8211	-3.05019	0.156982	0.435176	4.32488			0.654668	-0.437038	-1.84603	-0.657244	-0.358386	-2.67271	4.67736	-0.14672	0.067718	-1.2108	0.826042	3.36963	6.47686	1.57466	-2.12813	4.32452	4.6599
1.418	3.6757	-0.460586	3.85526	-1.42262	-0.250166	0.58996	0.572796	-1.01263	-2.04189	-2.65314	1.02479	-4.36432	0.824628	-3.03428	0.147756	0.404418	4.31315			0.65898	-0.429408	-1.83823	-0.6587	-0.368312	-2.64949	4.69004	-0.137438	0.066962	-1.22636	0.828842	3.36136	6.42901	1.56789	-2.14411	4.35814	4.5745
1.42	3.69673	-0.45409	3.85133	-1.43742	-0.27622	0.588518	0.633038	-1.02176	-2.03398	-2.63417	1.04531	-4.42348	0.78463	-3.02751	0.143192	0.351806	4.30674			0.668304	-0.41139	-1.81951	-0.655536	-0.358862	-2.66854	4.694	-0.151998	0.070686	-1.22028	0.835002	3.31159	6.46691	1.56316	-2.16783	4.3685	4.51598
1.422	3.69946	-0.454734	3.87807	-1.42115	-0.260862	0.560658	0.65394	-1.02855	-2.03252	-2.60875	1.03477	-4.43472	0.78764	-3.02918	0.130648	0.29512	4.34806			0.669928	-0.401226	-1.85219	-0.642054	-0.365848	-2.66697	4.70938	-0.16128	0.084658	-1.25469	0.827806	3.31783	6.51374	1.56176	-2.16833	4.41063	4.57295
1.424	3.71703	-0.463092	3.89283	-1.42006	-0.224826	0.575162	0.686238	-1.03142	-2.03196	-2.61835	1.02974	-4.44928	0.765128	-3.03989	0.124152	0.240674	4.36177			0.686644	-0.42665	-1.87155	-0.655858	-0.376614	-2.70092	4.71183	-0.166782	0.084392	-1.24935	0.826476	3.28273	6.56753	1.57762	-2.16308	4.43633	4.61037
1.426	3.69305	-0.44681	3.90753	-1.41672	-0.22638	0.553238	0.687148	-1.02049	-2.02476	-2.63511	1.02782	-4.43103	0.759906	-3.06349	0.134652	0.19551	4.33231			0.697242	-0.396046	-1.86561	-0.655634	-0.341768	-2.69447	4.74292	-0.151144	0.105574	-1.26573	0.819686	3.27356	6.57572	1.59081	-2.19236	4.45435	4.64355
1.428	3.69428	-0.431676	3.91419	-1.42118	-0.233296	0.54908	0.697634	-1.01984	-2.02264	-2.62618	1.01777	-4.39894	0.763504	-3.06642	0.148974	0.215642	4.26419			0.699748	-0.4039	-1.85388	-0.66766	-0.353864	-2.68649	4.7626	-0.147042	0.07014	-1.25927	0.822626	3.29346	6.55474	1.60906	-2.19404	4.39876	4.71264
1.43	3.69772	-0.454202	3.94594	-1.4386	-0.25627	0.546714	0.68446	-1.03519	-2.03347	-2.64471	1.01193	-4.38333	0.757638	-3.07615	0.155624	0.233828	4.22307			0.712418	-0.410228	-1.84239	-0.677012	-0.356706	-2.66266	4.78257	-0.152124	0.069916	-1.24743	0.816494	3.32248	6.54878	1.62655	-2.16105	4.37025	4.75472
1.432	3.69622	-0.479808	3.92623	-1.43851	-0.25732	0.566888	0.63469	-1.03058	-2.02415	-2.64684	1.01279	-4.41001	0.761698	-3.06796	0.161126	0.25382	4.16984			0.729722	-0.405748	-1.81212	-0.671986	-0.369656	-2.6706	4.80347	-0.159068	0.101766	-1.23845	0.823158	3.31712	6.50751	1.63027	-2.16196	4.4011	4.73749
1.434	3.72354	-0.482888	3.90237	-1.43751	-0.265272	0.598486	0.62482	-1.0096	-2.03532	-2.64573	1.0067	-4.42303	0.78722	-3.0625	0.153188	0.234262	4.18246			0.712082	-0.399994	-1.78907	-0.665252	-0.385448	-2.71762	4.78884	-0.153048	0.08386	-1.23879	0.825552	3.29938	6.52782	1.6092	-2.2058	4.43178	4.75973
1.436	3.71455	-0.484022	3.90926	-1.43672	-0.269654	0.62692	0.631386	-1.04168	-2.06161	-2.64723	1.01472	-4.49166	0.79807	-3.04758	0.15183	0.175364	4.17591			0.69104	-0.401086	-1.79326	-0.66388	-0.396578	-2.71263	4.75136	-0.16408	0.070952	-1.25755	0.830536	3.27135	6.56016	1.60971	-2.18506	4.4429	4.69654
1.438	3.73764	-0.485198	3.87948	-1.43364	-0.261604	0.562982	0.599438	-1.05643	-2.04442	-2.64611	1.02519	-4.52158	0.77378	-3.05178	0.137746	0.103642	4.21197			0.671006	-0.409206	-1.79416	-0.661276	-0.380044	-2.71232	4.74897	-0.15288	0.081536	-1.257	0.822094	3.25395	6.58923	1.59251	-2.18939	4.47933	4.6648
1.44	3.72765	-0.485618	3.91651	-1.44206	-0.258832	0.545496	0.651798	-1.05055	-2.07791	-2.64278	1.03842	-4.51686	0.746662	-3.05778	0.132664	0.052864	4.28838			0.685328	-0.407036	-1.82543	-0.672882	-0.38227	-2.71988	4.77663	-0.132034	0.120736	-1.25839	0.83013	3.24118	6.65945	1.60282	-2.20793	4.48774	4.71239
1.442	3.74221	-0.496888	3.91632	-1.43343	-0.243964	0.5362	0.685258	-1.03074	-2.06711	-2.64286	1.0477	-4.50863	0.72555	-3.07223	0.116788	0.000126	4.17528			0.703766	-0.391846	-1.81497	-0.669592	-0.402808	-2.70687	4.78527	-0.179074	0.107632	-1.27886	0.830074	3.25599	6.65757	1.62674	-2.17161	4.5282	4.72552
1.444	3.74331	-0.505834	3.96424	-1.43856	-0.264292	0.541758	0.680204	-1.04486	-2.05082	-2.63274	1.05073	-4.47857	0.716772	-3.08545	0.145208	-0.015792	4.22397			0.746018	-0.407484	-1.83971	-0.673456	-0.364686	-2.72035	4.80791	-0.168308	0.101276	-1.27704	0.830676	3.23924	6.59533	1.63916	-2.19016	4.49681	4.78724
1.446	3.74536	-0.485926	3.97463	-1.45033	-0.241402	0.548982	0.689682	-1.03534	-2.05288	-2.63588	1.04714	-4.46271	0.707462	-3.10108	0.14175	0.016352	4.16947			0.76083	-0.385756	-1.82475	-0.685356	-0.344526	-2.75331	4.81737	-0.17444	0.078344	-1.30074	0.83384	3.27674	6.57839	1.64563	-2.18162	4.48238	4.82476
1.448	3.7184	-0.491456	3.97576	-1.46006	-0.243684	0.599634	0.690998	-1.04413	-2.04481	-2.64201	1.05127	-4.48704	0.714196	-3.10905	0.131684	0.05943	4.10134			0.737016	-0.34818	-1.81231	-0.686798	-0.351722	-2.75666	4.82292	-0.165438	0.086758	-1.29851	0.823634	3.30091	6.57243	1.65572	-2.19579	4.47415	4.88369
1.45	3.74053	-0.51163	3.98175	-1.45506	-0.262948	0.621656	0.68418	-1.04861	-2.06461	-2.66739	1.05508	-4.51844	0.717024	-3.08966	0.13055	0.052374	4.05062			0.742994	-0.38262	-1.81461	-0.686014	-0.3633	-2.72845	4.82895	-0.160286	0.075992	-1.29832	0.818734	3.25494	6.56485	1.64238	-2.18922	4.48981	4.88701
1.452	3.75199	-0.49728	3.96789	-1.44584	-0.2506	0.600026	0.639492	-1.05276	-2.07778	-2.65378	1.03467	-4.57729	0.71526	-3.07905	0.151732	0.024178	4.08737			0.761446	-0.390012	-1.79969	-0.679826	-0.399644	-2.74604	4.82601	-0.174132	0.087976	-1.29794	0.826224	3.26087	6.63026	1.64028	-2.25338	4.50797	4.87389
1.454	3.7555	-0.520338	3.98754	-1.44378	-0.277802	0.581546	0.656642	-1.0339	-2.09961	-2.68778	1.03582	-4.58774	0.699538	-3.07927	0.14056	-0.056672	4.13647			0.770336	-0.41678	-1.79123	-0.675528	-0.399028	-2.72139	4.8404	-0.173642	0.091378	-1.27306	0.820372	3.25025	6.68119	1.63351	-2.25961	4.51352	4.82009
1.456	3.76925	-0.499758	3.95441	-1.4509	-0.264474	0.538552	0.634816	-1.02995	-2.08839	-2.67009	1.03249	-4.58898	0.703472	-3.08589	0.121632	-0.107716	4.12831			0.721112	-0.392518	-1.77257	-0.68502	-0.374962	-2.74565	4.82656	-0.178374	0.103418	-1.28426	0.822976	3.21859	6.69045	1.63981	-2.25404	4.56166	4.781
1.458	3.76894	-0.495124	3.94993	-1.44561	-0.26607	0.522704	0.602476	-1.06536	-2.11476	-2.66876	1.01644	-4.58784	0.682136	-3.0998	0.111818	-0.177198	4.16177			0.74809	-0.399588	-1.77636	-0.684432	-0.359828	-2.76975	4.82413	-0.181398	0.130032	-1.2907	0.82985	3.23561	6.71279	1.65542	-2.20893	4.5821	4.83823
1.46	3.77832	-0.484428	4.00662	-1.46717	-0.24906	0.546868	0.671832	-1.06474	-2.10386	-2.68988	1.02724	-4.55025	0.69083	-3.11735	0.127666	-0.198534	4.11629			0.763924	-0.39949	-1.81684	-0.69895	-0.385546	-2.76815	4.81327	-0.164318	0.091336	-1.28444	0.829206	3.20988	6.68752	1.66704	-2.19533	4.57785	4.84002
1.462	3.77248	-0.49924	3.99053	-1.47461	-0.254212	0.56364	0.691292	-1.03345	-2.0844	-2.6683	1.06039	-4.5366	0.669634	-3.12719	0.123102	-0.200284	4.07365			0.75572	-0.401702	-1.81089	-0.690242	-0.384944	-2.74235	4.83116	-0.172088	0.099106	-1.3084	0.83118	3.23576	6.65875	1.67703	-2.20956	4.56779	4.87435
1.464	3.77684	-0.489986	4.02156	-1.47206	-0.24969	0.587594	0.712194	-1.05798	-2.08302	-2.70241	1.06677	-4.54012	0.682864	-3.13678	0.125874	-0.175896	3.86557			0.746872	-0.408464	-1.8244	-0.701148	-0.384902	-2.73014	4.87158	-0.161476	0.09919	-1.31883	0.82943	3.24619	6.659	1.68767	-2.20426	4.56123	5.0035
1.466	3.80537	-0.44646	4.03808	-1.47517	-0.254632	0.561988	0.72856	-1.05363	-2.07579	-2.69361	1.06764	-4.58689	0.692272	-3.11893	0.133518	-0.171192	3.96158			0.785288	-0.388262	-1.81047	-0.706776	-0.368956	-2.7385	4.88706	-0.16072	0.090272	-1.30675	0.839678	3.24019	6.65924	1.684	-2.25904	4.55588	4.97385
1.468	3.81529	-0.49035	4.04583	-1.47349	-0.24227	0.567742	0.721924	-1.04346	-2.07169	-2.71289	1.0774	-4.63222	0.694918	-3.1053	0.128772	-0.145838	3.89528			0.777938	-0.412818	-1.77656	-0.715204	-0.37023	-2.77445	4.89558	-0.155526	0.057764	-1.30297	0.836976	3.22274	6.68535	1.67658	-2.22768	4.56434	4.97442
1.47	3.7925	-0.485926	4.06076	-1.4686	-0.240884	0.536256	0.70245	-1.04248	-2.10328	-2.7203	1.07618	-4.65613	0.694554	-3.10796	0.125412	-0.20272	3.93634			0.73598	-0.42	-1.76757	-0.712908	-0.36414	-2.78554	4.9166	-0.164416	0.090776	-1.32035	0.828394	3.20905	6.71948	1.66761	-2.23552	4.55637	4.97645
1.472	3.80141	-0.478156	4.0376	-1.48079	-0.244594	0.530726	0.67319	-1.04311	-2.10025	-2.70462	1.08539	-4.66697	0.67585	-3.11056	0.108094	-0.252826	3.95896			0.74375	-0.407722	-1.7523	-0.702884	-0.388178	-2.76336	4.91915	-0.166026	0.086702	-1.30553	0.81823	3.19528	6.78899	1.66803	-2.23796	4.5855	4.8853
1.474	3.81052	-0.496552	4.01818	-1.47959	-0.26866	0.502936	0.636748	-1.07297	-2.12128	-2.71187	1.07629	-4.63691	0.676102	-3.1212	0.124334	-0.352786	3.97846			0.789656	-0.445172	-1.73456	-0.680862	-0.39165	-2.74841	4.9152	-0.197092	0.103936	-1.30935	0.827246	3.182	6.77501	1.68365	-2.21294	4.61924	4.87388
1.476	3.81774	-0.48804	4.00903	-1.48236	-0.266602	0.530166	0.62783	-1.04777	-2.11151	-2.71576	1.08158	-4.63513	0.649488	-3.14059	0.13083	-0.416556	3.96473			0.767788	-0.42952	-1.72477	-0.677516	-0.400148	-2.77276	4.91301	-0.182462	0.098588	-1.32583	0.826742	3.22413	6.73659	1.70246	-2.24795	4.63193	4.88986
1.478	3.83832	-0.493318	4.01993	-1.47725	-0.25417	0.528374	0.59675	-1.03411	-2.11389	-2.69758	1.06362	-4.60183	0.648592	-3.15364	0.132636	-0.452844	3.98229			0.72548	-0.443898	-1.73953	-0.682388	-0.400862	-2.76331	4.91471	-0.182728	0.11536	-1.34932	0.820372	3.20432	6.69194	1.7092	-2.21592	4.64663	4.90074
1.48	3.80919	-0.485674	4.02907	-1.48029	-0.24892	0.540344	0.616182	-1.08455	-2.12071	-2.70385	1.05973	-4.61629	0.65765	-3.16358	0.115094	-0.404726	3.95283			0.747404	-0.41993	-1.7757	-0.689178	-0.388514	-2.76342	4.90784	-0.184282	0.128926	-1.33361	0.825916	3.21908	6.69983	1.71583	-2.23017	4.60919	4.95484
1.482	3.81289	-0.505974	4.04839	-1.48317	-0.217616	0.522158	0.683774	-1.06455	-2.08421	-2.72265	1.03904	-4.66393	0.679098	-3.15858	0.118454	-0.369082	3.883			0.789894	-0.433776	-1.78693	-0.718256	-0.397068	-2.78977	4.93242	-0.195748	0.102928	-1.34977	0.831544	3.21444	6.74443	1.71765	-2.25816	4.58434	4.99556
1.484	3.82683	-0.501704	4.05023	-1.47365	-0.245882	0.50505	0.702478	-1.05519	-2.0774	-2.71506	1.05638	-4.69126	0.664188	-3.13495	0.123074	-0.33271	3.79571			0.78302	-0.418348	-1.77755	-0.72429	-0.375046	-2.78018	4.95235	-0.17563	0.101976	-1.32	0.82488	3.20321	6.76953	1.71317	-2.24659	4.59424	5.03184
1.486	3.83758	-0.490812	4.07656	-1.47951	-0.251328	0.493892	0.712642	-1.07541	-2.10076	-2.74016	1.06616	-4.74065	0.67039	-3.12585	0.104062	-0.383138	3.75302			0.80136	-0.421764	-1.77808	-0.721798	-0.381024	-2.7946	4.96121	-0.185038	0.071372	-1.33809	0.82208	3.18058	6.81353	1.71451	-2.27091	4.58636	5.05557
1.488	3.84019	-0.494732	4.10519	-1.48462	-0.24934	0.486724	0.72968	-1.0522	-2.09805	-2.7314	1.08723	-4.72958	0.642838	-3.13208	0.12026	-0.429856	3.80821			0.82551	-0.455616	-1.76578	-0.723394	-0.36386	-2.8141	4.98933	-0.173922	0.075684	-1.34408	0.821352	3.17145	6.83242	1.69574	-2.28143	4.60302	5.0276
1.49	3.79655	-0.502964	4.10248	-1.49009	-0.228676	0.47691	0.710346	-1.04381	-2.11296	-2.73876	1.08499	-4.73305	0.643916	-3.14072	0.129794	-0.49413	3.83643			0.830508	-0.44555	-1.75508	-0.730982	-0.390866	-2.80839	4.99306	-0.17696	0.100226	-1.33039	0.827708	3.17309	6.87469	1.69322	-2.28875	4.60967	4.95978
1.492	3.81814	-0.509264	4.11097	-1.49933	-0.26775	0.479598	0.702856	-1.06588	-2.14483	-2.72728	1.10062	-4.68681	0.631876	-3.1486	0.127876	-0.542808	3.85862			0.819644	-0.444486	-1.7254	-0.719768	-0.39515	-2.77803	4.99766	-0.176232	0.1302	-1.34441	0.832314	3.1943	6.80912	1.72374	-2.25308	4.64302	4.94845
1.494	3.85326	-0.509558	4.09819	-1.49339	-0.282366	0.505904	0.665854	-1.06596	-2.13961	-2.74933	1.11177	-4.68223	0.613704	-3.16704	0.146832	-0.640416	3.80296			0.779842	-0.416052	-1.72739	-0.705628	-0.39641	-2.76886	5.00385	-0.196168	0.106078	-1.33822	0.832762	3.20687	6.80651	1.74546	-2.28708	4.66854	5.03521
1.496	3.86919	-0.490392	4.09298	-1.49493	-0.291774	0.521598	0.642236	-1.08394	-2.12029	-2.71879	1.09304	-4.67939	0.608468	-3.17216	0.14287	-0.66213	3.87338			0.758912	-0.422982	-1.70166	-0.706888	-0.392714	-2.81019	4.98635	-0.197904	0.11214	-1.35432	0.820386	3.2219	6.78161	1.75344	-2.29827	4.67718	4.9764
1.498	3.88587	-0.506968	4.08128	-1.48599	-0.268856	0.5397	0.631386	-1.0723	-2.16327	-2.71389	1.09529	-4.73663	0.62853	-3.17597	0.15057	-0.62944	3.83933			0.75894	-0.4494	-1.70762	-0.723968	-0.398384	-2.81329	4.98085	-0.15834	0.119294	-1.35367	0.82096	3.19035	6.79864	1.75157	-2.32711	4.64331	5.00616
1.5	3.8565	-0.491862	4.10236	-1.48816	-0.233912	0.463918	0.640906	-1.07552	-2.13478	-2.73743	1.07726	-4.76808	0.62055	-3.17128	0.134582	-0.632786	3.80005			0.798126	-0.41132	-1.71364	-0.726824	-0.381906	-2.83087	4.97738	-0.153482	0.150332	-1.36045	0.817292	3.189	6.83661	1.74815	-2.29772	4.63582	5.05169
1.502	3.82823	-0.47691	4.10043	-1.5038	-0.261632	0.441784	0.67571	-1.09305	-2.11515	-2.74599	1.08331	-4.81153	0.624582	-3.15944	0.145992	-0.571942	3.74387			0.838404	-0.408772	-1.73883	-0.736092	-0.399658	-2.83184	4.99337	-0.1624	0.134134	-1.3669	0.81214	3.16908	6.86361	1.74041	-2.27973	4.64292	5.08868
1.504	3.82098	-0.479486	4.11355	-1.50727	-0.266392	0.452494	0.708218	-1.09876	-2.13154	-2.77546	1.09085	-4.7838	0.593796	-3.15693	0.118748	-0.575512	3.66397			0.889042	-0.408506	-1.75001	-0.736302	-0.38213	-2.81368	5.01178	-0.201096	0.112728	-1.35754	0.822906	3.17418	6.89896	1.73299	-2.33209	4.64894	5.13507
1.506	3.81499	-0.522172	4.11428	-1.51588	-0.250866	0.489762	0.71974	-1.07773	-2.13363	-2.76049	1.0792	-4.77175	0.58079	-3.16162	0.135954	-0.636146	3.69137			0.8841	-0.428162	-1.73778	-0.734552	-0.399756	-2.81163	5.0469	-0.182336	0.100758	-1.35094	0.827134	3.16443	6.93311	1.73862	-2.32786	4.66823	5.14791
1.508	3.86715	-0.508508	4.16585	-1.50475	-0.27783	0.495628	0.709184	-1.07129	-2.14949	-2.76273	1.07415	-4.76127	0.573944	-3.17527	0.139594	-0.7126	3.75936			0.853062	-0.447272	-1.72728	-0.729862	-0.38472	-2.85832	5.06338	-0.189602	0.09331	-1.3546	0.826602	3.17384	6.89835	1.74769	-2.3036	4.66178	5.05756
1.51	3.88984	-0.522326	4.20528	-1.50998	-0.272608	0.511924	0.712628	-1.06516	-2.15827	-2.7578	1.09764	-4.73949	0.561358	-3.19732	0.1568	-0.796418	3.75053			0.77378	-0.438186	-1.72197	-0.722946	-0.380464	-2.84178	5.063	-0.177758	0.098826	-1.37305	0.826938	3.15825	6.85425	1.76502	-2.32439	4.6765	5.02571
1.512	3.89445	-0.501648	4.17904	-1.51022	-0.249508	0.512904	0.7035	-1.06215	-2.14255	-2.77782	1.0939	-4.73224	0.59164	-3.2093	0.141176	-0.8778	3.74702			0.752528	-0.42511	-1.70668	-0.721028	-0.40453	-2.86105	5.09274	-0.184646	0.11179	-1.35072	0.81865	3.20639	6.83931	1.7674	-2.33211	4.65891	5.0673
1.514	3.9341	-0.510902	4.19038	-1.50007	-0.275016	0.499044	0.662214	-1.08419	-2.16609	-2.73536	1.10485	-4.76967	0.579796	-3.19978	0.147616	-0.881622	3.73688			0.717374	-0.424298	-1.69191	-0.726026	-0.406546	-2.84253	5.10509	-0.213556	0.127792	-1.37341	0.827764	3.19214	6.8595	1.78753	-2.32259	4.66557	5.08858
1.516	3.94426	-0.499702	4.17113	-1.51022	-0.281652	0.477386	0.656824	-1.10186	-2.16346	-2.77465	1.12209	-4.79602	0.568624	-3.19038	0.139608	-0.831166	3.71729			0.731556	-0.42112	-1.68577	-0.72555	-0.37569	-2.85404	5.07919	-0.221634	0.13006	-1.38565	0.825006	3.1674	6.87201	1.78524	-2.35061	4.64807	5.08087
1.518	3.95203	-0.525644	4.17868	-1.51189	-0.2681	0.443296	0.629566	-1.09502	-2.14158	-2.77091	1.12405	-4.8516	0.558656	-3.17418	0.127302	-0.835212	3.68714			0.762062	-0.445144	-1.67098	-0.728616	-0.385994	-2.83472	5.06667	-0.199444	0.138264	-1.36321	0.830312	3.12026	6.91117	1.7814	-2.32719	4.65231	5.16025
1.52	3.93812	-0.527968	4.15085	-1.51633	-0.268254	0.42056	0.642544	-1.07471	-2.1394	-2.77994	1.11306	-4.84641	0.533512	-3.17797	0.11046	-0.814156	3.63896			0.75222	-0.45206	-1.68652	-0.7434	-0.386736	-2.83819	5.05343	-0.175084	0.104538	-1.381	0.816312	3.13481	6.94357	1.76905	-2.31736	4.66067	5.20597
1.522	3.92304	-0.488124	4.17332	-1.51714	-0.274568	0.422632	0.693826	-1.10307	-2.13745	-2.80025	1.10898	-4.84765	0.509558	-3.18352	0.113106	-0.884016	3.58078			0.796138	-0.42966	-1.6925	-0.743848	-0.392042	-2.84676	5.09015	-0.141932	0.109466	-1.36952	0.818622	3.13736	6.9802	1.7667	-2.35162	4.66763	5.2388
1.524	3.89325	-0.520968	4.17712	-1.5247	-0.289604	0.431452	0.705054	-1.10837	-2.15387	-2.79892	1.09785	-4.82852	0.497336	-3.19767	0.130326	-0.935844	3.54283			0.821198	-0.40656	-1.7023	-0.7371	-0.37268	-2.81588	5.11911	-0.195636	0.110544	-1.35843	0.813918	3.13839	6.99304	1.78536	-2.34751	4.6478	5.24951
1.526	3.88234	-0.53067	4.18597	-1.51493	-0.272132	0.450562	0.708862	-1.11054	-2.16576	-2.77941	1.09337	-4.80497	0.5215	-3.21451	0.127708	-1.00079	3.63525			0.832426	-0.450492	-1.69963	-0.733628	-0.38304	-2.84063	5.13446	-0.207074	0.100226	-1.38923	0.824572	3.16539	6.94259	1.80744	-2.35609	4.6496	5.16579
1.528	3.87748	-0.53361	4.2019	-1.51152	-0.270032	0.44443	0.715036	-1.09509	-2.19537	-2.78389	1.09799	-4.78745	0.520506	-3.22699	0.113036	-1.07255	3.61397			0.849142	-0.42609	-1.70009	-0.738696	-0.373184	-2.84948	5.15306	-0.203798	0.10045	-1.38495	0.835842	3.16849	6.92444	1.80943	-2.32533	4.63805	5.11988
1.53	3.88389	-0.524342	4.23192	-1.52573	-0.254506	0.42504	0.71526	-1.09063	-2.16811	-2.78482	1.09381	-4.82049	0.517664	-3.23702	0.121254	-1.09332	3.66292			0.841722	-0.45353	-1.67255	-0.7343	-0.38234	-2.86289	5.13804	-0.196308	0.106008	-1.39262	0.83048	3.15084	6.93812	1.81727	-2.37766	4.66133	5.13222
1.532	3.9202	-0.51366	4.25548	-1.52831	-0.250656	0.424914	0.716268	-1.10071	-2.18886	-2.79997	1.09829	-4.85701	0.541828	-3.22301	0.114282	-1.08609	3.65425			0.780836	-0.445928	-1.67016	-0.730604	-0.400876	-2.87942	5.13227	-0.183582	0.151354	-1.41113	0.822626	3.13219	6.93328	1.8178	-2.35469	4.62167	5.16649
1.534	3.93701	-0.505778	4.22926	-1.53208	-0.285712	0.436744	0.638302	-1.09795	-2.17519	-2.81788	1.10904	-4.90669	0.54747	-3.20649	0.09632	-1.03505	3.63118			0.78218	-0.452172	-1.67783	-0.741258	-0.398972	-2.90787	5.16974	-0.208754	0.151984	-1.39811	0.821786	3.11492	6.93627	1.81468	-2.38043	4.62647	5.18728
1.536	3.96284	-0.509922	4.21144	-1.52918	-0.293118	0.442554	0.650622	-1.11751	-2.16979	-2.80196	1.11693	-4.91191	0.496062	-3.20027	0.07728	-1.01989	3.56482			0.802564	-0.446712	-1.64707	-0.742448	-0.414246	-2.84654	5.17056	-0.231462	0.12068	-1.39786	0.829066	3.10038	6.96472	1.80383	-2.3469	4.63418	5.20754
1.538	3.97179	-0.502824	4.19908	-1.53887	-0.309778	0.402234	0.645428	-1.12566	-2.14911	-2.81096	1.14023	-4.90703	0.475594	-3.21315	0.082796	-1.0289	3.50172			0.806498	-0.452942	-1.62894	-0.742546	-0.398244	-2.84935	5.17023	-0.217854	0.111048	-1.40843	0.82089	3.09096	7.03755	1.80163	-2.35876	4.6508	5.25556
1.54	3.97659	-0.499856	4.21697	-1.53772	-0.289058	0.378406	0.6587	-1.11227	-2.17329	-2.81352	1.13736	-4.90769	0.461062	-3.23278	0.098154	-1.06252	3.44553			0.790482	-0.427056	-1.62602	-0.758016	-0.414512	-2.85792	5.16536	-0.2233	0.092904	-1.39233	0.827428	3.08799	7.02152	1.81863	-2.36517	4.63145	5.29539
1.542	3.98959	-0.482776	4.22159	-1.53278	-0.257292	0.44107	0.680092	-1.10208	-2.18578	-2.82533	1.13	-4.87913	0.44646	-3.24339	0.09492	-1.16498	3.48753			0.793506	-0.403564	-1.62491	-0.771876	-0.415982	-2.90427	5.16649	-0.19019	0.118104	-1.39336	0.83027	3.06737	6.98169	1.82337	-2.33437	4.62966	5.28632
1.544	3.96434	-0.53312	4.21652	-1.52736	-0.258314	0.426188	0.715666	-1.10492	-2.20837	-2.84138	1.13945	-4.87487	0.449414	-3.26066	0.072716	-1.23498	3.49086			0.82019	-0.434882	-1.63778	-0.765842	-0.37842	-2.90632	5.16071	-0.171724	0.110684	-1.40694	0.822948	3.07856	6.97817	1.85513	-2.33811	4.62063	5.18735
1.546	3.95921	-0.531468	4.21835	-1.53646	-0.252574	0.416514	0.692986	-1.13886	-2.21761	-2.82748	1.14094	-4.9	0.459032	-3.25487	0.081046	-1.28983	3.51519			0.828898	-0.446796	-1.65494	-0.75236	-0.393624	-2.912	5.19848	-0.212128	0.120624	-1.40827	0.820498	3.09344	6.97799	1.86327	-2.34287	4.63581	5.16907
1.548	3.95647	-0.52773	4.26185	-1.5364	-0.262514	0.385126	0.69937	-1.13165	-2.21617	-2.82912	1.12424	-4.91641	0.472318	-3.241	0.083454	-1.35114	3.53361			0.844886	-0.4459	-1.65775	-0.736736	-0.381318	-2.90604	5.23767	-0.217252	0.119658	-1.42576	0.823144	3.08538	7.00657	1.8527	-2.38274	4.6465	5.23306
1.55	3.96787	-0.546882	4.26597	-1.55627	-0.244202	0.352954	0.695884	-1.13141	-2.22211	-2.8121	1.1143	-4.95326	0.46088	-3.23394	0.068628	-1.32027	3.53562			0.837662	-0.458738	-1.65201	-0.742658	-0.383516	-2.89708	5.24714	-0.193046	0.138012	-1.41462	0.821002	3.07436	7.01492	1.83952	-2.40138	4.63519	5.27072
1.552	3.97814	-0.547134	4.29936	-1.53923	-0.253736	0.383446	0.699832	-1.11023	-2.2192	-2.84928	1.12008	-4.9992	0.446474	-3.23194	0.06902	-1.30306	3.50722			0.81711	-0.451724	-1.63913	-0.764148	-0.408086	-2.92505	5.2291	-0.224042	0.124586	-1.42898	0.826994	3.04769	7.03688	1.82819	-2.39173	4.62073	5.303
1.554	3.98086	-0.50988	4.30983	-1.54343	-0.278922	0.412902	0.621628	-1.10575	-2.19514	-2.82787	1.12057	-5.00181	0.420854	-3.23987	0.065898	-1.26287	3.42664			0.81284	-0.436926	-1.63404	-0.775474	-0.406574	-2.94241	5.24595	-0.235886	0.119056	-1.414	0.834316	3.05259	7.05032	1.83765	-2.39469	4.62477	5.2898
1.556	3.99172	-0.526456	4.30791	-1.5387	-0.29029	0.4606	0.60305	-1.09015	-2.17745	-2.86392	1.12147	-4.97693	0.393638	-3.24797	0.060144	-1.21923	3.34411			0.837396	-0.448224	-1.6344	-0.77245	-0.41671	-2.94139	5.23911	-0.230314	0.12712	-1.40715	0.826084	3.05439	7.05741	1.86229	-2.34266	4.61836	5.35907
1.558	3.99773	-0.520604	4.2708	-1.53471	-0.283794	0.451836	0.612248	-1.12482	-2.18999	-2.86849	1.12595	-4.96286	0.40054	-3.26259	0.080248	-1.27183	3.35271			0.861924	-0.448784	-1.60903	-0.771008	-0.417662	-2.93987	5.23757	-0.251286	0.108962	-1.40879	0.82712	3.03827	7.05397	1.87694	-2.37357	4.606	5.34941
1.56	4.00177	-0.51478	4.26511	-1.54483	-0.280126	0.447132	0.621866	-1.15538	-2.20731	-2.88078	1.14806	-4.93952	0.40593	-3.28537	0.077938	-1.34082	3.35653			0.856254	-0.438508	-1.61024	-0.777182	-0.404292	-2.93525	5.227	-0.20972	0.122234	-1.43192	0.819742	3.04102	7.03833	1.87986	-2.34739	4.58038	5.30503
1.562	3.98688	-0.51569	4.25508	-1.55555	-0.261828	0.422002	0.668962	-1.13516	-2.21704	-2.87624	1.1509	-4.95705	0.400022	-3.28674	0.076034	-1.44262	3.4075			0.844662	-0.417298	-1.60012	-0.789474	-0.400918	-2.94573	5.2201	-0.185948	0.12145	-1.47146	0.813624	3.05411	7.02808	1.87894	-2.37346	4.60631	5.25482
1.564	4.0033	-0.546168	4.27141	-1.55578	-0.26362	0.378784	0.699692	-1.13991	-2.2135	-2.87935	1.15142	-4.9558	0.41174	-3.27818	0.086016	-1.49999	3.42378			0.860832	-0.449414	-1.60299	-0.78176	-0.379974	-2.95753	5.23426	-0.180152	0.123802	-1.4323	0.818818	3.02795	7.04089	1.88252	-2.4176	4.5877	5.31696
1.566	3.97816	-0.542094	4.30108	-1.55474	-0.268884	0.374808	0.697214	-1.13767	-2.22828	-2.85733	1.1678	-5.00347	0.406924	-3.25928	0.08743	-1.55565	3.43622			0.87227	-0.432992	-1.62599	-0.776496	-0.397152	-2.95358	5.25827	-0.176162	0.136626	-1.45275	0.826812	3.01795	7.06366	1.86998	-2.39345	4.58402	5.34687
1.568	3.99742	-0.530712	4.3034	-1.55774	-0.264376	0.356664	0.691894	-1.13179	-2.21189	-2.85557	1.15804	-5.05338	0.419104	-3.25574	0.06223	-1.52029	3.40263			0.858578	-0.477288	-1.64664	-0.765436	-0.404446	-2.93665	5.28812	-0.179676	0.134946	-1.44602	0.822486	2.98336	7.08667	1.86207	-2.37779	4.56599	5.36731
1.57	3.97802	-0.521962	4.34518	-1.552	-0.289002	0.366786	0.705838	-1.14131	-2.22733	-2.87501	1.16012	-5.05022	0.37695	-3.25955	0.055258	-1.51613	3.31751			0.88375	-0.460166	-1.62338	-0.765534	-0.405328	-2.931	5.3219	-0.199556	0.121156	-1.45915	0.818132	3.01039	7.09531	1.85809	-2.42064	4.5844	5.41085
1.572	4.00554	-0.507962	4.37121	-1.54879	-0.283332	0.386848	0.636986	-1.11376	-2.20765	-2.87962	1.15206	-5.04008	0.351078	-3.27223	0.05964	-1.51172	3.25963			0.848316	-0.442386	-1.62275	-0.790902	-0.395108	-2.96016	5.31044	-0.217728	0.151732	-1.45183	0.818524	2.99484	7.11154	1.87394	-2.36215	4.56802	5.45068
1.574	3.99673	-0.502404	4.36198	-1.55282	-0.289198	0.38311	0.626248	-1.12804	-2.2107	-2.91136	1.12995	-5.03604	0.352478	-3.2914	0.107646	-1.49687	3.25522			0.864752	-0.486052	-1.60166	-0.79842	-0.412286	-2.96332	5.32378	-0.229782	0.119532	-1.4517	0.815808	2.99085	7.12037	1.88881	-2.3912	4.58954	5.42021
1.576	4.00127	-0.504826	4.37443	-1.56677	-0.299222	0.37975	0.627032	-1.14439	-2.22631	-2.90765	1.14206	-5.0048	0.34804	-3.3104	0.112728	-1.52011	3.28369			0.867202	-0.466564	-1.59673	-0.803082	-0.396004	-2.96701	5.30631	-0.252056	0.121128	-1.46009	0.82159	2.97704	7.06548	1.91369	-2.41881	4.60835	5.3586
1.578	4.01169	-0.51023	4.35044	-1.56925	-0.296086	0.357546	0.582302	-1.13904	-2.24724	-2.91962	1.12991	-4.98284	0.333662	-3.30714	0.096782	-1.60836	3.30589			0.889084	-0.445774	-1.56356	-0.79744	-0.425124	-2.99095	5.29346	-0.23387	0.12523	-1.45225	0.813358	3.02998	7.05265	1.92262	-2.38498	4.58128	5.30656
1.58	4.02707	-0.541506	4.35	-1.57863	-0.28812	0.350994	0.631764	-1.14864	-2.25952	-2.91598	1.1422	-5.01439	0.340816	-3.30331	0.120806	-1.68073	3.31449			0.906304	-0.451052	-1.57021	-0.802354	-0.41034	-2.96968	5.29908	-0.218848	0.140308	-1.43591	0.820218	3.01517	7.07232	1.91355	-2.42077	4.56869	5.38653
1.582	4.05128	-0.53494	4.33579	-1.5814	-0.321734	0.324044	0.673064	-1.14384	-2.26489	-2.93369	1.15919	-5.04197	0.344498	-3.285	0.11032	-1.74751	3.20362			0.90727	-0.468636	-1.58203	-0.804314	-0.384104	-2.96562	5.29854	-0.174482	0.13671	-1.46128	0.817628	2.98274	7.10786	1.89728	-2.45269	4.55081	5.49462
1.584	4.03637	-0.509362	4.33626	-1.58046	-0.2933	0.324114	0.672896	-1.12403	-2.26236	-2.91255	1.16164	-5.07977	0.315084	-3.28416	0.099064	-1.7424	3.1886			0.874328	-0.454832	-1.57144	-0.799568	-0.383222	-2.97562	5.31089	-0.166306	0.132664	-1.45963	0.814884	2.9615	7.13542	1.88881	-2.4369	4.51324	5.51296
1.586	4.07441	-0.53305	4.37175	-1.57157	-0.273014	0.338212	0.679224	-1.13012	-2.26433	-2.9287	1.1795	-5.10096	0.31325	-3.28789	0.072296	-1.70401	3.23656			0.859796	-0.464646	-1.60147	-0.792442	-0.402878	-2.96405	5.34979	-0.194628	0.147896	-1.46804	0.81592	2.95326	7.1332	1.89337	-2.40262	4.50743	5.49595
1.588	4.02969	-0.52234	4.35715	-1.56775	-0.26152	0.36932	0.670376	-1.13728	-2.2401	-2.9268	1.19489	-5.09544	0.28007	-3.29141	0.06111	-1.6855	3.16887			0.897652	-0.469966	-1.6036	-0.791504	-0.398272	-2.95469	5.38763	-0.218316	0.132468	-1.50349	0.822332	2.9647	7.16334	1.91288	-2.43869	4.51541	5.49592
1.59	4.03591	-0.518	4.3898	-1.57144	-0.30737	0.365386	0.658378	-1.14111	-2.22127	-2.92047	1.18184	-5.09849	0.246862	-3.31724	0.077042	-1.69308	3.09359			0.950054	-0.460334	-1.5848	-0.78603	-0.40334	-2.98253	5.404	-0.238798	0.153986	-1.49187	0.829248	2.96997	7.17636	1.93351	-2.40072	4.52697	5.52089
1.592	4.04292	-0.515718	4.42379	-1.5759	-0.281232	0.31948	0.608902	-1.14646	-2.22918	-2.94456	1.19575	-5.06993	0.244608	-3.33194	0.080668	-1.73561	3.11074			0.933086	-0.449568	-1.57032	-0.804062	-0.412734	-2.9888	5.38215	-0.240604	0.124922	-1.4572	0.82509	2.99758	7.14399	1.94214	-2.38581	4.51889	5.52838
1.594	4.06209	-0.504378	4.42893	-1.58641	-0.3094	0.31241	0.572628	-1.14316	-2.21689	-2.92785	1.18329	-5.03643	0.252126	-3.33763	0.115528	-1.77327	3.13785			0.886732	-0.46914	-1.55147	-0.81221	-0.396494	-2.98714	5.41218	-0.239862	0.127876	-1.47001	0.816914	2.99902	7.09097	1.94534	-2.41914	4.51422	5.43103
1.596	4.05751	-0.503048	4.4246	-1.58474	-0.330008	0.306166	0.57253	-1.14415	-2.24427	-2.9589	1.18954	-5.05599	0.258692	-3.33228	0.146104	-1.85599	3.17542			0.883862	-0.442596	-1.5555	-0.817628	-0.417452	-2.97539	5.38671	-0.218344	0.127316	-1.47669	0.822486	2.97165	7.11178	1.94795	-2.4743	4.49841	5.43525
1.598	4.06531	-0.528752	4.37912	-1.58712	-0.318178	0.296618	0.574448	-1.1409	-2.26309	-2.9556	1.1774	-5.0689	0.26684	-3.31261	0.126098	-1.91967	3.06867			0.87661	-0.42231	-1.55072	-0.829514	-0.44107	-2.98893	5.36459	-0.228606	0.134554	-1.4519	0.827148	2.95217	7.11985	1.94372	-2.45623	4.48609	5.55685
1.6	4.08146	-0.545818	4.38887	-1.57433	-0.316652	0.283906	0.614306	-1.1528	-2.25666	-2.95457	1.15998	-5.11225	0.284284	-3.31281	0.118832	-1.92293	3.20692			0.89922	-0.468202	-1.53306	-0.819966	-0.415226	-2.9652	5.36508	-0.212394	0.144802	-1.45384	0.827414	2.94823	7.1427	1.92914	-2.44451	4.4674	5.47253
1.602	4.1273	-0.549934	4.40845	-1.58332	-0.314314	0.265356	0.644714	-1.15065	-2.28332	-2.92492	1.16946	-5.1479	0.246372	-3.31737	0.069748	-1.93472	3.1402			0.916342	-0.476112	-1.531	-0.825384	-0.37499	-2.9737	5.37947	-0.185962	0.134736	-1.50536	0.8176	2.91488	7.17938	1.92867	-2.42368	4.42687	5.48541
1.604	4.11426	-0.555282	4.4007	-1.5877	-0.317226	0.281946	0.66262	-1.14702	-2.273	-2.94455	1.1599	-5.15624	0.245462	-3.32458	0.082236	-1.93862	2.9812			0.90146	-0.464926	-1.52043	-0.819854	-0.38927	-3.0162	5.38191	-0.205982	0.162876	-1.50395	0.820512	2.92907	7.21671	1.94303	-2.44329	4.45481	5.61308
1.606	4.10357	-0.55384	4.40255	-1.6084	-0.318864	0.318822	0.681324	-1.14852	-2.27812	-2.94003	1.16808	-5.14927	0.23261	-3.3376	0.084588	-1.91369	3.00089			0.913234	-0.46403	-1.55777	-0.799806	-0.390614	-3.00525	5.42011	-0.193438	0.181524	-1.49026	0.81333	2.93896	7.19538	1.95878	-2.44999	4.47296	5.54635
1.608	4.06774	-0.539644	4.434	-1.60364	-0.297262	0.321776	0.708736	-1.16732	-2.24652	-2.94867	1.18174	-5.15697	0.219366	-3.35091	0.106428	-1.89175	3.00255			0.917056	-0.454622	-1.56285	-0.793702	-0.416514	-2.99498	5.46006	-0.217672	0.152264	-1.49883	0.817544	2.93647	7.19446	1.97319	-2.4829	4.45278	5.53874
1.61	4.08801	-0.563738	4.42435	-1.60002	-0.324086	0.291676	0.702576	-1.15429	-2.25667	-2.97424	1.19778	-5.12043	0.240604	-3.35927	0.105686	-1.93358	3.01941			0.920766	-0.471688	-1.56701	-0.80689	-0.419076	-3.00101	5.46396	-0.256004	0.1274	-1.47055	0.812322	2.95054	7.16344	1.98548	-2.45022	4.41913	5.50221
1.612	4.09016	-0.566272	4.42092	-1.59597	-0.32557	0.259196	0.671132	-1.17257	-2.27254	-2.96586	1.19794	-5.1087	0.23884	-3.36066	0.108066	-1.98211	3.00656			0.914914	-0.457254	-1.56146	-0.828814	-0.408646	-2.985	5.45775	-0.239414	0.134148	-1.49096	0.81711	2.89827	7.19685	1.99147	-2.45746	4.41076	5.47618
1.614	4.12854	-0.548422	4.46852	-1.5927	-0.329952	0.257404	0.618478	-1.16025	-2.2898	-2.98589	1.20837	-5.12603	0.253666	-3.35254	0.130382	-2.06984	3.04867			0.86835	-0.447174	-1.54493	-0.849716	-0.394632	-3.00657	5.44515	-0.238266	0.15729	-1.50363	0.81585	2.89096	7.17493	1.98367	-2.50288	4.3827	5.44947
1.616	4.13309	-0.522368	4.47586	-1.59702	-0.33796	0.274302	0.604534	-1.1514	-2.2787	-2.98999	1.21444	-5.15501	0.222264	-3.33725	0.123074	-2.11415	3.04807			0.861826	-0.4214	-1.50164	-0.843444	-0.401394	-3.04401	5.46622	-0.233254	0.14364	-1.50161	0.817348	2.89306	7.19905	1.97648	-2.50103	4.36339	5.50483
1.618	4.11228	-0.557284	4.46247	-1.60552	-0.325458	0.323358	0.58065	-1.15713	-2.28437	-2.98105	1.20931	-5.19733	0.206948	-3.33256	0.111006	-2.15911	3.01958			0.885248	-0.410368	-1.53168	-0.831852	-0.436296	-3.04686	5.46064	-0.214564	0.137816	-1.48819	0.823536	2.88448	7.23919	1.95945	-2.52468	4.337	5.50738
1.62	4.11918	-0.588826	4.43899	-1.59664	-0.303688	0.330834	0.609854	-1.17886	-2.29439	-2.96202	1.21842	-5.20829	0.178164	-3.34589	0.082698	-2.16787	2.96941			0.912506	-0.439698	-1.50674	-0.822696	-0.414078	-3.03838	5.47436	-0.190078	0.158284	-1.50629	0.828226	2.8832	7.27689	1.96984	-2.45528	4.32876	5.51044
1.622	4.1431	-0.573664	4.44345	-1.61332	-0.31122	0.319886	0.616952	-1.17047	-2.29949	-2.98271	1.20704	-5.23132	0.159124	-3.35478	0.066332	-2.14147	2.84712			0.949214	-0.451962	-1.46843	-0.824194	-0.379162	-3.04401	5.46902	-0.197106	0.182798	-1.4959	0.82131	2.88541	7.29061	1.9865	-2.46023	4.33335	5.67337
1.624	4.15012	-0.576268	4.47205	-1.61521	-0.304262	0.317142	0.626556	-1.14779	-2.31575	-2.98584	1.19567	-5.21415	0.201432	-3.38307	0.059654	-2.12405	2.8337			0.952728	-0.481796	-1.4896	-0.821744	-0.391342	-3.03989	5.47579	-0.20363	0.173488	-1.51193	0.820106	2.9212	7.24737	2.01398	-2.46225	4.34609	5.61299
1.626	4.16087	-0.572894	4.43514	-1.60772	-0.312046	0.260512	0.65317	-1.15878	-2.27601	-2.99615	1.18955	-5.19463	0.179858	-3.39095	0.123368	-2.15205	2.80815			0.950516	-0.471688	-1.4743	-0.825398	-0.410242	-3.05945	5.4985	-0.23093	0.17423	-1.51035	0.820106	2.95019	7.24884	2.02678	-2.47575	4.37034	5.59653
1.628	4.14334	-0.560546	4.44433	-1.60174	-0.299558	0.25984	0.65779	-1.13758	-2.27535	-3.01442	1.18731	-5.16478	0.183078	-3.38397	0.124012	-2.13349	2.84458			0.951104	-0.469672	-1.49895	-0.82971	-0.420714	-3.02844	5.53237	-0.246498	0.144746	-1.50658	0.820078	2.90135	7.2445	2.03014	-2.50684	4.3765	5.55964
1.63	4.13435	-0.581042	4.48739	-1.59687	-0.317044	0.273196	0.67837	-1.18314	-2.28778	-3.02687	1.18759	-5.18015	0.190106	-3.36767	0.10157	-2.20198	2.87802			0.934654	-0.463134	-1.54634	-0.830214	-0.432236	-3.03099	5.54782	-0.270256	0.137368	-1.51417	0.827904	2.85002	7.23772	2.02359	-2.48794	4.32289	5.49486
1.632	4.17578	-0.557956	4.48809	-1.60237	-0.315056	0.283094	0.65268	-1.19134	-2.30506	-3.01258	1.19861	-5.20143	0.194684	-3.36452	0.122374	-2.27639	2.91837			0.896728	-0.453474	-1.533	-0.83734	-0.434616	-3.05346	5.54418	-0.265188	0.137382	-1.52298	0.827484	2.84703	7.27814	2.01407	-2.5139	4.28756	5.53773
1.634	4.17865	-0.543214	4.50626	-1.60702	-0.316484	0.290122	0.614474	-1.18931	-2.30591	-3.03495	1.19783	-5.21882	0.173614	-3.36428	0.106946	-2.32813	2.89026			0.90146	-0.449162	-1.52629	-0.849576	-0.419706	-3.04385	5.549	-0.22379	0.14609	-1.51483	0.817894	2.85179	7.29257	1.99902	-2.47044	4.263	5.56182
1.636	4.17157	-0.5348	4.54574	-1.61382	-0.314482	0.27825	0.610988	-1.16824	-2.31762	-3.01781	1.20992	-5.25972	0.16541	-3.37316	0.098168	-2.36211	2.898			0.901628	-0.426804	-1.5136	-0.849002	-0.41454	-3.03629	5.5587	-0.256102	0.15029	-1.51091	0.80738	2.84112	7.31097	2.00348	-2.48417	4.22934	5.56343
1.638	4.16524	-0.539252	4.55398	-1.61729	-0.30618	0.280658	0.617666	-1.16896	-2.29685	-2.99739	1.21902	-5.28448	0.1127	-3.38174	0.071148	-2.36853	2.82489			0.894124	-0.477484	-1.50074	-0.847042	-0.419692	-3.05896	5.56368	-0.235942	0.161686	-1.53856	0.817684	2.90307	7.35585	2.02847	-2.45666	4.20302	5.58207
1.64	4.1452	-0.549444	4.53215	-1.60054	-0.32284	0.270326	0.588924	-1.16981	-2.31462	-3.00346	1.22076	-5.26847	0.10346	-3.39697	0.100786	-2.31475	2.74231			0.934864	-0.471898	-1.48708	-0.841624	-0.421162	-3.06844	5.53521	-0.232106	0.181664	-1.54676	0.807296	2.95984	7.34033	2.05306	-2.49726	4.21168	5.6119
1.642	4.14455	-0.589092	4.52336	-1.60594	-0.334992	0.263648	0.61432	-1.18216	-2.32511	-3.02364	1.21678	-5.27913	0.117068	-3.41552	0.098532	-2.31687	2.69329			0.972524	-0.487452	-1.4512	-0.839468	-0.405342	-3.08519	5.55682	-0.222558	0.160608	-1.53993	0.807478	2.9252	7.31282	2.05852	-2.51615	4.20592	5.64495
1.644	4.17445	-0.572208	4.50142	-1.61312	-0.317338	0.248374	0.621446	-1.19232	-2.28672	-3.01896	1.21667	-5.24749	0.123732	-3.42122	0.082264	-2.33708	2.70239			0.981484	-0.463946	-1.4496	-0.825748	-0.40138	-3.03344	5.56238	-0.236544	0.17416	-1.53017	0.79884	2.88005	7.30233	2.06342	-2.49766	4.25691	5.64561
1.646	4.19167	-0.560224	4.52346	-1.62588	-0.310632	0.230118	0.62265	-1.18343	-2.29188	-3.04361	1.21493	-5.25329	0.137018	-3.41685	0.110894	-2.3452	2.72257			0.99897	-0.462084	-1.42772	-0.839706	-0.407932	-3.02711	5.58149	-0.207144	0.143066	-1.55343	0.789306	2.8223	7.29306	2.05638	-2.54722	4.2616	5.58411
1.648	4.19633	-0.57337	4.52018	-1.62448	-0.310884	0.230762	0.656236	-1.19116	-2.30045	-3.05271	1.21493	-5.24626	0.15834	-3.40435	0.112658	-2.39499	2.74344			0.981918	-0.46501	-1.44543	-0.843934	-0.430976	-3.0394	5.59754	-0.243684	0.113204	-1.55527	0.797538	2.83508	7.30702	2.05573	-2.49705	4.2099	5.55061
1.65	4.18631	-0.570248	4.54929	-1.62196	-0.305158	0.251748	0.659568	-1.18668	-2.3193	-3.03792	1.2252	-5.26327	0.153132	-3.38478	0.07434	-2.47433	2.76597			1.0011	-0.453572	-1.49219	-0.863366	-0.427714	-3.06029	5.61985	-0.24794	0.148694	-1.54088	0.794038	2.88651	7.31298	2.06954	-2.47741	4.1886	5.58912
1.652	4.18548	-0.55706	4.56751	-1.61245	-0.309316	0.23044	0.648116	-1.19165	-2.34318	-3.05631	1.21477	-5.29593	0.11116	-3.3901	0.084812	-2.54454	2.75751			1.00573	-0.454314	-1.49134	-0.866516	-0.42469	-3.06089	5.64053	-0.232442	0.158242	-1.56212	0.792106	2.91299	7.37143	2.05603	-2.48457	4.13375	5.6194
1.654	4.21478	-0.561232	4.5803	-1.61332	-0.307314	0.25235	0.634872	-1.2007	-2.34023	-3.06985	1.20816	-5.3185	0.085764	-3.40564	0.085666	-2.52241	2.72996			0.990892	-0.447538	-1.4889	-0.876722	-0.42042	-3.07469	5.61603	-0.245266	0.127484	-1.55498	0.803152	2.89296	7.40328	2.06046	-2.47775	4.11554	5.65907
1.656	4.23472	-0.571326	4.60419	-1.61249	-0.308056	0.22484	0.634284	-1.1927	-2.32442	-3.03521	1.2048	-5.32354	0.082908	-3.42145	0.060676	-2.5219	2.65835			0.992292	-0.49091	-1.47626	-0.881454	-0.395724	-3.07119	5.63753	-0.236418	0.202398	-1.56689	0.816228	2.8821	7.38906	2.07757	-2.4712	4.10152	5.68267
1.658	4.21782	-0.576114	4.60292	-1.61963	-0.314342	0.222012	0.649908	-1.17999	-2.32166	-3.04486	1.21744	-5.32319	0.065072	-3.43682	0.060998	-2.46562	2.61344			1.00302	-0.481502	-1.46388	-0.876288	-0.41783	-3.07836	5.62362	-0.233338	0.195244	-1.56733	0.811202	2.84323	7.37551	2.09737	-2.49367	4.09094	5.70714
1.66	4.21887	-0.575876	4.59354	-1.62267	-0.317534	0.210364	0.626976	-1.17047	-2.33036	-3.06963	1.22314	-5.28767	0.07476	-3.43991	0.055552	-2.48871	2.55989			0.979118	-0.480816	-1.43233	-0.855008	-0.456624	-3.08049	5.65414	-0.236712	0.182588	-1.56643	0.808108	2.81949	7.36019	2.11445	-2.49494	4.14399	5.72377
1.662	4.23286	-0.567252	4.58332	-1.62718	-0.353682	0.204386	0.641802	-1.17692	-2.33468	-3.04368	1.22732	-5.29441	0.088452	-3.43678	0.086646	-2.49831	2.60557			0.972566	-0.474586	-1.42258	-0.8526	-0.408828	-3.09473	5.63342	-0.231	0.157332	-1.57153	0.799358	2.83581	7.35141	2.12096	-2.52025	4.13757	5.71617
1.664	4.24018	-0.566818	4.57612	-1.62995	-0.324898	0.183988	0.631596	-1.19977	-2.33575	-3.05964	1.24016	-5.29204	0.083958	-3.43456	0.101276	-2.57293	2.60434			0.991228	-0.46872	-1.3992	-0.849842	-0.410116	-3.05392	5.63849	-0.244188	0.142184	-1.55884	0.793716	2.87251	7.34881	2.11788	-2.49619	4.07613	5.66223
1.666	4.23891	-0.582988	4.56372	-1.62393	-0.318108	0.193018	0.631512	-1.1942	-2.319	-3.07377	1.24083	-5.33442	0.082376	-3.42301	0.092358	-2.62819	2.64536			0.981834	-0.467684	-1.391	-0.864248	-0.41629	-3.06932	5.64834	-0.225106	0.14378	-1.56856	0.793282	2.86083	7.37195	2.09966	-2.50243	4.0507	5.62719
1.668	4.25804	-0.57183	4.58534	-1.62021	-0.301532	0.207438	0.640304	-1.19577	-2.34475	-3.08822	1.25068	-5.36407	0.056882	-3.42663	0.080668	-2.68604	2.55534			0.98847	-0.465738	-1.42402	-0.87822	-0.415156	-3.09702	5.67816	-0.220472	0.14322	-1.55462	0.797174	2.83412	7.39316	2.08785	-2.52419	4.01344	5.74203
1.67	4.27042	-0.556514	4.6193	-1.62277	-0.302918	0.244398	0.637196	-1.18453	-2.34532	-3.08599	1.2552	-5.3989	0.014756	-3.43046	0.11641	-2.73168	2.64356			0.988456	-0.484358	-1.45418	-0.88067	-0.432628	-3.10918	5.7223	-0.261562	0.148988	-1.58511	0.792386	2.83576	7.43088	2.08657	-2.51937	3.9691	5.71963
1.672	4.24161	-0.569548	4.62689	-1.63031	-0.31073	0.237398	0.629272	-1.1888	-2.36065	-3.07741	1.25633	-5.40421	0.00126	-3.4391	0.0938	-2.68923	2.62185			0.996002	-0.460152	-1.47748	-0.886606	-0.402136	-3.10135	5.716	-0.244524	0.167986	-1.56614	0.788774	2.8051	7.43624	2.1146	-2.5233	3.9606	5.70388
1.674	4.22955	-0.587132	4.65457	-1.63691	-0.306964	0.213276	0.653926	-1.20313	-2.34357	-3.07469	1.23983	-5.42518	0.00714	-3.45337	0.069566	-2.66403	2.53253			1.00171	-0.463652	-1.46929	-0.894306	-0.397432	-3.10901	5.69897	-0.277116	0.17003	-1.58712	0.793296	2.79339	7.42629	2.12363	-2.53693	3.91621	5.72201
1.676	4.24929	-0.572082	4.68782	-1.64774	-0.31927	0.167986	0.692748	-1.20931	-2.34853	-3.07955	1.22416	-5.39539	0.028434	-3.4699	0.063672	-2.65542	2.4718			0.997962	-0.499282	-1.45278	-0.894628	-0.422618	-3.10132	5.70913	-0.267484	0.18928	-1.59821	0.792792	2.81677	7.39389	2.14893	-2.55952	3.93502	5.74746
1.678	4.26429	-0.575386	4.66854	-1.63957	-0.335034	0.171486	0.67781	-1.21958	-2.33558	-3.08844	1.22081	-5.35916	0.009492	-3.45955	0.089936	-2.66732	2.42806			1.00836	-0.475902	-1.44859	-0.88256	-0.44317	-3.10288	5.68337	-0.269444	0.17465	-1.60341	0.804818	2.82149	7.40312	2.15303	-2.55844	3.97953	5.80356
1.68	4.25319	-0.568022	4.68024	-1.64277	-0.337442	0.187656	0.672294	-1.19546	-2.32074	-3.0896	1.2227	-5.35945	0.008442	-3.45377	0.0931	-2.69795	2.45685			1.00803	-0.484792	-1.42128	-0.874216	-0.452648	-3.11949	5.71123	-0.259588	0.166992	-1.59681	0.803292	2.85025	7.40382	2.15092	-2.52638	3.97226	5.77566
1.682	4.275	-0.585606	4.65941	-1.63047	-0.357308	0.19453	0.66234	-1.19949	-2.33818	-3.0952	1.23592	-5.37795	-0.009226	-3.44774	0.079562	-2.76352	2.51642			0.980574	-0.50204	-1.37456	-0.870324	-0.418922	-3.14125	5.69201	-0.239638	0.130158	-1.56489	0.802228	2.82009	7.39858	2.13746	-2.52367	3.92469	5.69544
1.684	4.27384	-0.584752	4.6552	-1.62849	-0.318094	0.243096	0.624358	-1.2035	-2.35018	-3.10722	1.24769	-5.42429	-0.016198	-3.44369	0.075586	-2.80358	2.54708			0.959728	-0.50442	-1.37759	-0.886648	-0.413742	-3.12416	5.7021	-0.236208	0.135646	-1.54883	0.794458	2.7945	7.4534	2.11807	-2.54402	3.87638	5.63993
1.686	4.30164	-0.602126	4.65583	-1.63759	-0.304094	0.231826	0.596078	-1.21393	-2.33836	-3.13394	1.25272	-5.45847	-0.048874	-3.46717	0.0917	-2.89614	2.54715			0.994196	-0.496902	-1.38846	-0.897694	-0.429758	-3.13709	5.73737	-0.246554	0.168392	-1.57363	0.786786	2.7798	7.46362	2.13529	-2.58433	3.80519	5.71035
1.688	4.31507	-0.555688	4.65905	-1.65238	-0.287616	0.202272	0.587188	-1.2021	-2.36943	-3.14623	1.26687	-5.47414	-0.059374	-3.48228	0.084504	-2.93285	2.54422			1.00512	-0.487704	-1.4076	-0.918582	-0.430906	-3.13999	5.73472	-0.262584	0.166446	-1.60339	0.793296	2.76521	7.4838	2.16552	-2.54863	3.76344	5.76426
1.69	4.31844	-0.571144	4.67202	-1.6472	-0.30429	0.194096	0.62006	-1.22002	-2.34899	-3.13942	1.26896	-5.47459	-0.03465	-3.49527	0.11557	-2.8768	2.46677			1.00591	-0.470946	-1.44925	-0.904302	-0.433706	-3.1225	5.76604	-0.273966	0.177184	-1.60122	0.794934	2.74604	7.49216	2.1812	-2.57991	3.78386	5.75827
1.692	4.30406	-0.590856	4.68556	-1.65033	-0.312662	0.182154	0.624316	-1.20144	-2.3627	-3.12294	1.26995	-5.457	-0.037338	-3.48352	0.080234	-2.85811	2.39625			1.01521	-0.485198	-1.44908	-0.911876	-0.448406	-3.12274	5.79286	-0.25648	0.17325	-1.61581	0.789194	2.76962	7.50309	2.20186	-2.54971	3.7661	5.77738
1.694	4.29142	-0.56854	4.70319	-1.64933	-0.347942	0.175462	0.632996	-1.21884	-2.35102	-3.13967	1.27042	-5.44034	-0.020958	-3.48452	0.067018	-2.83312	2.35232			1.03844	-0.499814	-1.42213	-0.917714	-0.40852	-3.15521	5.78973	-0.276192	0.1834	-1.63321	0.78575	2.76356	7.50309	2.18529	-2.55818	3.78907	5.79754
1.696	4.26198	-0.586138	4.73654	-1.64501	-0.336406	0.18648	0.673652	-1.22734	-2.36968	-3.13405	1.25546	-5.43949	-0.02772	-3.47123	0.067844	-2.86059	2.29909			1.07855	-0.484498	-1.4167	-0.91091	-0.428036	-3.15186	5.7884	-0.281218	0.186914	-1.62918	0.790706	2.76618	7.48492	2.17231	-2.55613	3.79999	5.80054
1.698	4.26927	-0.571942	4.74069	-1.64478	-0.339346	0.193578	0.689276	-1.21877	-2.38522	-3.13572	1.25894	-5.45724	-0.047054	-3.47588	0.086856	-2.87612	2.35747			1.0827	-0.472794	-1.39131	-0.916132	-0.45024	-3.14915	5.7839	-0.271544	0.192598	-1.59611	0.78603	2.77038	7.48187	2.15753	-2.55394	3.79603	5.79893
1.7	4.25193	-0.578942	4.74201	-1.65591	-0.353836	0.178164	0.68208	-1.21407	-2.36823	-3.1507	1.24032	-5.485	-0.05831	-3.48118	0.076636	-2.9645	2.37468			1.06911	-0.490546	-1.37791	-0.909608	-0.42049	-3.11528	5.79625	-0.283346	0.166586	-1.59881	0.79079	2.75177	7.49123	2.17654	-2.58748	3.74055	5.73224
1.702	4.26097	-0.591206	4.73165	-1.66204	-0.315448	0.167272	0.66633	-1.22263	-2.39253	-3.1579	1.24988	-5.5138	-0.080136	-3.48988	0.09646	-3.02397	2.41639			1.03037	-0.470568	-1.35148	-0.902846	-0.43008	-3.11599	5.79456	-0.275114	0.17612	-1.59517	0.80003	2.72616	7.51958	2.1943	-2.5781	3.70227	5.75586
1.704	4.31292	-0.58905	4.70603	-1.65347	-0.311668	0.161364	0.641984	-1.21716	-2.3898	-3.16677	1.25583	-5.53655	-0.113666	-3.51121	0.069874	-3.06419	2.43669			1.02768	-0.465472	-1.32868	-0.893718	-0.424242	-3.12823	5.79114	-0.23863	0.175504	-1.60138	0.792918	2.70999	7.54446	2.21466	-2.58854	3.64346	5.76066
1.706	4.32904	-0.580608	4.7017	-1.65221	-0.299446	0.144368	0.627018	-1.21622	-2.38878	-3.19511	1.24963	-5.53741	-0.099176	-3.51719	0.078806	-3.06883	2.39051			1.03986	-0.48881	-1.33645	-0.90734	-0.432964	-3.14212	5.78578	-0.256228	0.171752	-1.61025	0.791126	2.69756	7.52538	2.22902	-2.62566	3.6381	5.80378
1.708	4.3407	-0.610134	4.67725	-1.66016	-0.298886	0.123074	0.645428	-1.20949	-2.40258	-3.15787	1.26896	-5.51856	-0.072786	-3.52379	0.04095	-3.02939	2.32872			1.05956	-0.46466	-1.33918	-0.930832	-0.419048	-3.11842	5.8185	-0.267568	0.185122	-1.63248	0.786198	2.68398	7.56918	2.23744	-2.59137	3.6283	5.77844
1.71	4.3456	-0.606578	4.72508	-1.65122	-0.341936	0.12649	0.64232	-1.22639	-2.39477	-3.14761	1.28615	-5.50053	-0.0371	-3.50242	0.062188	-3.03643	2.27959			1.04819	-0.502124	-1.36865	-0.93331	-0.45178	-3.10379	5.83899	-0.262444	0.212828	-1.6155	0.784882	2.68471	7.58274	2.23153	-2.62882	3.58806	5.83184
1.712	4.3625	-0.606382	4.76315	-1.64851	-0.350462	0.13195	0.664804	-1.24772	-2.39159	-3.16063	1.29154	-5.49268	-0.070924	-3.49098	0.074732	-3.02611	2.21833			1.05399	-0.501494	-1.38972	-0.93947	-0.457212	-3.10702	5.82351	-0.27664	0.177884	-1.64689	0.789558	2.71018	7.53077	2.21766	-2.61904	3.64578	5.86289
1.714	4.35246	-0.593572	4.76172	-1.65962	-0.354802	0.142422	0.670068	-1.22503	-2.40068	-3.16334	1.28764	-5.50809	-0.102956	-3.49073	0.07609	-3.04172	2.17448			1.05535	-0.494718	-1.369	-0.934458	-0.428008	-3.11521	5.84678	-0.29239	0.220332	-1.64744	0.786478	2.72665	7.49876	2.20802	-2.58695	3.64314	5.88596
1.716	4.30675	-0.60228	4.79052	-1.67324	-0.350672	0.1645	0.701568	-1.24715	-2.37556	-3.18629	1.28834	-5.51649	-0.101066	-3.49744	0.097468	-3.05658	2.22999			1.11891	-0.46648	-1.37511	-0.926534	-0.465892	-3.13769	5.86008	-0.289478	0.193186	-1.63897	0.777588	2.70336	7.5151	2.21151	-2.6258	3.60319	5.85334
1.718	4.28799	-0.612164	4.79721	-1.67601	-0.34195	0.16436	0.712054	-1.24278	-2.37878	-3.18364	1.28863	-5.55657	-0.106064	-3.50567	0.071414	-3.1135	2.28787			1.09984	-0.483056	-1.37774	-0.91518	-0.41727	-3.15293	5.82364	-0.28609	0.166964	-1.61955	0.77973	2.67932	7.5244	2.23677	-2.60421	3.55757	5.78355
1.72	4.29065	-0.596008	4.82822	-1.67574	-0.338352	0.129346	0.710626	-1.23271	-2.40946	-3.19005	1.29185	-5.60214	-0.098448	-3.53014	0.092778	-3.16585	2.26313			1.08598	-0.482706	-1.34498	-0.9177	-0.410396	-3.14342	5.81769	-0.281106	0.174146	-1.63087	0.783006	2.66223	7.60337	2.25779	-2.66552	3.50984	5.78823
1.722	4.35894	-0.61019	4.79051	-1.67922	-0.32053	0.100814	0.745612	-1.22849	-2.42015	-3.19476	1.2871	-5.59521	-0.061096	-3.53374	0.093366	-3.22748	2.24041			1.07087	-0.487578	-1.33525	-0.930594	-0.434322	-3.13387	5.84024	-0.281554	0.17479	-1.61421	0.78463	2.6446	7.60403	2.27326	-2.65794	3.46822	5.82996
1.724	4.37885	-0.611212	4.75569	-1.66732	-0.31899	0.069538	0.695086	-1.23329	-2.43802	-3.22973	1.26482	-5.57124	-0.069594	-3.54283	0.083678	-3.20438	2.24686			1.05449	-0.462644	-1.30166	-0.941878	-0.4508	-3.14331	5.83692	-0.27006	0.195832	-1.64073	0.788676	2.67757	7.66546	2.28071	-2.61454	3.46476	5.83339
1.726	4.35695	-0.579866	4.75359	-1.66166	-0.335118	0.09359	0.65758	-1.23946	-2.42025	-3.21229	1.26153	-5.56732	-0.096922	-3.53231	0.036386	-3.16589	2.19857			1.08079	-0.486808	-1.29907	-0.944888	-0.440188	-3.17852	5.88031	-0.259112	0.218988	-1.63248	0.791812	2.67702	7.62961	2.27345	-2.63834	3.47035	5.86685
1.728	4.38256	-0.611212	4.75014	-1.67034	-0.343574	0.129444	0.679462	-1.23221	-2.43638	-3.19837	1.26416	-5.54915	-0.146972	-3.52356	0.046928	-3.16201	2.13374			1.09473	-0.471576	-1.29135	-0.952714	-0.42651	-3.18816	5.85402	-0.265524	0.227206	-1.66614	0.781592	2.69627	7.59256	2.26465	-2.65156	3.47803	5.892
1.73	4.41158	-0.61082	4.76769	-1.67345	-0.354494	0.150094	0.69363	-1.23995	-2.40933	-3.21763	1.28891	-5.56084	-0.149744	-3.50561	0.09527	-3.17538	2.07516			1.06744	-0.452872	-1.32377	-0.948458	-0.451738	-3.19245	5.88321	-0.304738	0.218638	-1.65781	0.779688	2.6941	7.54442	2.24895	-2.66777	3.50132	5.8822
1.732	4.40726	-0.60781	4.79665	-1.69316	-0.355516	0.163618	0.70371	-1.24643	-2.39617	-3.20005	1.30005	-5.57945	-0.125636	-3.50767	0.088102	-3.19326	2.02513			1.05573	-0.462826	-1.35442	-0.947114	-0.451486	-3.16211	5.90243	-0.285684	0.190652	-1.66925	0.776552	2.67758	7.59384	2.27307	-2.61545	3.50248	5.93775
1.734	4.37147	-0.626598	4.81309	-1.69121	-0.340004	0.119042	0.70266	-1.24113	-2.41973	-3.21161	1.30647	-5.63021	-0.094584	-3.52664	0.102172	-3.22909	2.06898			1.0876	-0.476448	-1.35054	-0.936236	-0.449638	-3.19182	5.90927	-0.269234	0.19516	-1.6603	0.778904	2.658	7.6484	2.29421	-2.67345	3.4434	5.89077
1.736	4.33161	-0.619108	4.81873	-1.69473	-0.34615	0.099666	0.686854	-1.24568	-2.43225	-3.21986	1.30819	-5.65403	-0.105392	-3.53847	0.091084	-3.2773	2.11021			1.14808	-0.47467	-1.326	-0.937034	-0.437318	-3.19021	5.89341	-0.297052	0.207256	-1.64389	0.772716	2.62359	7.6987	2.30958	-2.67774	3.38839	5.81741
1.738	4.35802	-0.616588	4.85961	-1.68672	-0.33579	0.063322	0.723324	-1.24128	-2.41639	-3.23571	1.30392	-5.66301	-0.124418	-3.56381	0.089754	-3.32794	2.13112			1.14136	-0.464324	-1.30816	-0.927472	-0.421176	-3.18576	5.89932	-0.291704	0.192766	-1.62782	0.76622	2.62004	7.68956	2.31664	-2.68936	3.30089	5.83269
1.74	4.35229	-0.618044	4.85265	-1.68811	-0.33579	0.07266	0.727496	-1.24166	-2.45386	-3.24719	1.31296	-5.63374	-0.159572	-3.56901	0.07385	-3.36326	2.11779			1.12377	-0.460488	-1.31257	-0.935816	-0.430892	-3.20134	5.89427	-0.296226	0.19607	-1.64921	0.775306	2.63465	7.71217	2.31995	-2.71515	3.23064	5.88823
1.742	4.36198	-0.622594	4.82867	-1.69133	-0.331212	0.083888	0.73654	-1.24463	-2.4284	-3.24409	1.31177	-5.62811	-0.1575	-3.56279	0.062804	-3.33155	2.10076			1.0843	-0.457002	-1.27999	-0.950796	-0.454874	-3.17633	5.93004	-0.297122	0.1631	-1.64709	0.764036	2.65299	7.67073	2.30919	-2.68988	3.23448	5.92134
1.744	4.40518	-0.60557	4.8259	-1.68297	-0.316428	0.08533	0.716898	-1.23459	-2.42936	-3.23753	1.30357	-5.6063	-0.172074	-3.54725	0.050652	-3.33687	2.04268			1.07689	-0.472332	-1.28192	-0.952952	-0.460446	-3.17939	5.93295	-0.290248	0.189756	-1.67889	0.769258	2.65422	7.64903	2.29761	-2.67728	3.23287	5.9117
1.746	4.41813	-0.626906	4.81484	-1.70877	-0.343616	0.081382	0.70203	-1.25002	-2.42634	-3.22391	1.30185	-5.60445	-0.174706	-3.53417	0.067648	-3.30212	1.97002			1.09493	-0.460278	-1.2887	-0.963004	-0.449862	-3.17629	5.8987	-0.297528	0.205688	-1.71034	0.77819	2.65943	7.63308	2.28507	-2.68668	3.28562	5.93838
1.748	4.43048	-0.653534	4.79809	-1.69854	-0.34293	0.06587	0.69167	-1.25853	-2.40638	-3.22872	1.29185	-5.64325	-0.148204	-3.52653	0.073332	-3.28908	1.90086			1.13669	-0.473326	-1.2825	-0.956648	-0.443422	-3.18111	5.92712	-0.300412	0.210196	-1.69659	0.771148	2.64124	7.66445	2.3113	-2.67098	3.27421	5.94222
1.75	4.43915	-0.622468	4.83022	-1.70355	-0.326844	0.046256	0.71463	-1.26851	-2.42278	-3.21681	1.29622	-5.66635	-0.143164	-3.52864	0.061334	-3.29805	1.83697			1.11167	-0.499674	-1.30344	-0.96145	-0.444682	-3.20666	5.95337	-0.301588	0.171528	-1.70414	0.770546	2.60757	7.67152	2.32975	-2.72315	3.26589	5.96161
1.752	4.41823	-0.619248	4.84056	-1.70929	-0.343784	0.052836	0.714756	-1.26113	-2.42371	-3.24849	1.29562	-5.70034	-0.152292	-3.54353	0.071428	-3.33767	1.94869			1.09894	-0.488516	-1.31733	-0.95627	-0.45591	-3.1711	5.97666	-0.305284	0.18116	-1.67131	0.781592	2.61024	7.71574	2.3365	-2.73115	3.22588	5.91594
1.754	4.38756	-0.616448	4.85678	-1.69868	-0.329672	0.054698	0.722974	-1.26762	-2.44185	-3.25112	1.30003	-5.72671	-0.202076	-3.55303	0.083356	-3.40026	1.95943			1.13508	-0.482006	-1.29763	-0.95214	-0.47026	-3.17008	6.00152	-0.30443	0.175364	-1.67573	0.777294	2.58287	7.75783	2.33842	-2.75941	3.1402	5.88839
1.756	4.38451	-0.609154	4.86408	-1.69848	-0.335314	0.06412	0.776174	-1.23549	-2.44782	-3.26774	1.31009	-5.70305	-0.19691	-3.57559	0.060816	-3.47084	1.98775			1.16738	-0.5096	-1.27795	-0.957726	-0.438144	-3.1682	5.9809	-0.284578	0.179732	-1.66421	0.772492	2.57629	7.75599	2.32558	-2.71565	3.08629	5.9025
1.758	4.40831	-0.617484	4.8875	-1.70366	-0.323204	0.044422	0.785918	-1.27273	-2.44433	-3.26798	1.31914	-5.70402	-0.215236	-3.57003	0.029638	-3.44362	1.99716			1.15525	-0.499912	-1.27071	-0.959644	-0.430542	-3.21049	5.95816	-0.296464	0.164304	-1.68235	0.762916	2.5947	7.72871	2.32604	-2.77439	3.03986	5.93603
1.76	4.39291	-0.599536	4.9	-1.70617	-0.318038	0.062006	0.799582	-1.28072	-2.44187	-3.27204	1.32492	-5.67476	-0.226674	-3.57245	0.044282	-3.43218	1.96811			1.1346	-0.47635	-1.26657	-0.98497	-0.436884	-3.199	5.93859	-0.304262	0.192318	-1.70477	0.766304	2.62037	7.68412	2.35095	-2.7383	3.05889	5.96863
1.762	4.41903	-0.59402	4.88572	-1.70635	-0.309988	0.050806	0.79534	-1.27067	-2.44334	-3.26043	1.33427	-5.66236	-0.198086	-3.55398	0.055538	-3.41397	1.90698			1.10643	-0.457002	-1.26095	-0.990052	-0.448056	-3.20806	5.94065	-0.322238	0.185794	-1.6812	0.771344	2.60928	7.69129	2.36608	-2.72367	3.06487	5.9548
1.764	4.41668	-0.595686	4.84746	-1.69868	-0.328132	0.027146	0.750204	-1.25658	-2.47927	-3.25518	1.33241	-5.65928	-0.200536	-3.54892	0.070868	-3.40385	1.82956			1.12466	-0.439264	-1.19832	-0.978068	-0.465864	-3.19633	5.97661	-0.311668	0.227668	-1.71462	0.768768	2.6028	7.69343	2.3732	-2.72602	3.10537	5.96929
1.766	4.43943	-0.628992	4.83613	-1.70397	-0.342174	0.005138	0.72464	-1.25843	-2.46875	-3.26922	1.33549	-5.71833	-0.18914	-3.55496	0.0735	-3.42628	1.74763			1.15891	-0.471548	-1.2112	-0.973812	-0.463316	-3.20501	6.00044	-0.293734	0.217196	-1.74297	0.764386	2.55632	7.71495	2.36111	-2.77467	3.08367	5.96935
1.768	4.4431	-0.614978	4.83122	-1.69891	-0.332108	-0.003556	0.708176	-1.24186	-2.4521	-3.26477	1.32125	-5.73724	-0.232414	-3.56573	0.083328	-3.44037	1.73149			1.15623	-0.486234	-1.18931	-0.970788	-0.462028	-3.20935	6.0046	-0.303758	0.220696	-1.72631	0.756602	2.52531	7.75564	2.34786	-2.75439	3.06795	5.95343
1.77	4.45717	-0.613886	4.84905	-1.70831	-0.325934	0.023338	0.720006	-1.25574	-2.4575	-3.28838	1.32506	-5.75558	-0.235354	-3.58921	0.073122	-3.49636	1.80377			1.15237	-0.507724	-1.23028	-0.967736	-0.46025	-3.20694	6.04555	-0.31094	0.19068	-1.71403	0.761264	2.51345	7.79393	2.35448	-2.76174	2.97842	5.94124
1.772	4.42772	-0.615776	4.89919	-1.72052	-0.322518	0.042742	0.74249	-1.27249	-2.48878	-3.29566	1.31715	-5.7379	-0.246862	-3.582	0.076496	-3.52106	1.80277			1.1676	-0.48363	-1.27889	-0.985124	-0.462868	-3.21518	6.04365	-0.321258	0.20454	-1.70534	0.76972	2.52542	7.7839	2.37301	-2.7571	2.9293	5.91987
1.774	4.40108	-0.615608	4.89237	-1.71431	-0.316428	0.0616	0.80689	-1.3034	-2.48795	-3.30477	1.31708	-5.73635	-0.276402	-3.58483	0.048076	-3.54745	1.645			1.20383	-0.484666	-1.28062	-0.979832	-0.455686	-3.2114	6.03362	-0.328888	0.232204	-1.69749	0.770406	2.54206	7.80725	2.39639	-2.75849	2.87197	5.98216
1.776	4.38302	-0.641732	4.90165	-1.72476	-0.320082	0.029526	0.835016	-1.27064	-2.50596	-3.30079	1.30724	-5.72519	-0.251706	-3.58908	0.033838	-3.54897	1.84534			1.20901	-0.480452	-1.25579	-0.984774	-0.441882	-3.22816	6.03785	-0.320796	0.216734	-1.72642	0.77483	2.54818	7.78351	2.40373	-2.76161	2.84199	5.98492
1.778	4.36883	-0.616084	4.93203	-1.72329	-0.307874	7e-05	0.8715	-1.26266	-2.4864	-3.30245	1.32152	-5.74965	-0.25214	-3.59783	0.06132	-3.50602	1.65054			1.2157	-0.49189	-1.251	-0.996366	-0.434742	-3.22116	6.0261	-0.300594	0.216146	-1.7008	0.763644	2.53602	7.75201	2.40268	-2.74667	2.85249	5.98014
1.78	4.42508	-0.61327	4.94532	-1.71832	-0.33544	-0.008624	0.819224	-1.28948	-2.49969	-3.287	1.33892	-5.74242	-0.256438	-3.58127	0.072856	-3.49145	1.74093			1.18124	-0.485646	-1.22389	-0.99883	-0.42854	-3.2018	6.03719	-0.296366	0.250082	-1.70926	0.76601	2.52928	7.74684	2.39037	-2.74228	2.86152	5.94528
1.782	4.44368	-0.597044	4.93539	-1.71634	-0.309582	-0.025494	0.75285	-1.27793	-2.48301	-3.28212	1.34497	-5.75581	-0.23464	-3.56688	0.081718	-3.52708	1.5338			1.16028	-0.472402	-1.1982	-1.01842	-0.46445	-3.20744	6.0656	-0.32886	0.228634	-1.74941	0.760886	2.51525	7.76343	2.39369	-2.72138	2.86377	6.02427
1.784	4.44436	-0.63294	4.94374	-1.7241	-0.33327	-0.013804	0.704466	-1.27672	-2.47661	-3.30394	1.35568	-5.78796	-0.259014	-3.56469	0.09485	-3.53851	1.60724			1.17473	-0.504504	-1.17085	-1.01543	-0.475902	-3.21021	6.0955	-0.30702	0.228214	-1.73811	0.763756	2.49708	7.82902	2.3959	-2.78706	2.85103	5.98968
1.786	4.44976	-0.619052	4.92285	-1.72288	-0.337848	-0.008848	0.689346	-1.26676	-2.47779	-3.28252	1.36174	-5.81262	-0.26614	-3.57749	0.093646	-3.55788	1.54147			1.21262	-0.512484	-1.16227	-0.973238	-0.458556	-3.21005	6.09752	-0.314076	0.20356	-1.74196	0.75852	2.48261	7.83499	2.39841	-2.78635	2.78754	5.98244
1.788	4.45781	-0.647864	4.90524	-1.7284	-0.326298	-0.008918	0.72366	-1.27548	-2.46882	-3.30585	1.36458	-5.82974	-0.297192	-3.59894	0.089838	-3.58074	1.63465			1.22307	-0.505484	-1.17704	-0.96355	-0.460558	-3.22778	6.09725	-0.313796	0.16912	-1.73916	0.75187	2.45834	7.86549	2.42462	-2.82481	2.72406	5.9857
1.79	4.46055	-0.638176	4.91053	-1.7214	-0.322574	-0.015372	0.775236	-1.27702	-2.48825	-3.30477	1.3491	-5.8093	-0.323484	-3.61675	0.081116	-3.61778	1.6599			1.23269	-0.480214	-1.1902	-0.958832	-0.45647	-3.20674	6.10089	-0.314104	0.190204	-1.74833	0.757302	2.48783	7.84431	2.43974	-2.791	2.66335	5.93604
1.792	4.42268	-0.629692	4.93895	-1.73299	-0.341334	-0.009114	0.813106	-1.29065	-2.49928	-3.31267	1.35576	-5.79928	-0.288274	-3.62649	0.064946	-3.65553	1.67553			1.22898	-0.483616	-1.20491	-0.975604	-0.46634	-3.22144	6.07662	-0.332682	0.191086	-1.73186	0.756056	2.48919	7.82071	2.45346	-2.8061	2.61435	5.94691
1.794	4.4116	-0.619416	4.96378	-1.72095	-0.324842	-0.015918	0.842128	-1.28442	-2.5061	-3.30175	1.3463	-5.78217	-0.305914	-3.61362	0.065674	-3.64946	1.68111			1.25677	-0.486038	-1.19262	-0.989044	-0.440426	-3.20043	6.0782	-0.332836	0.204848	-1.76635	0.758268	2.5055	7.80478	2.45148	-2.79371	2.62143	5.9796
1.796	4.4253	-0.640584	4.96604	-1.71808	-0.329504	-0.018172	0.826868	-1.29062	-2.50167	-3.32774	1.33594	-5.78141	-0.28854	-3.60284	0.081242	-3.62169	1.45383			1.26454	-0.516516	-1.19406	-0.991536	-0.433874	-3.21289	6.09249	-0.314146	0.225568	-1.75511	0.75831	2.51919	7.8083	2.4437	-2.83224	2.62951	6.00537
1.798	4.40635	-0.624596	4.99113	-1.72725	-0.330274	-0.026222	0.813568	-1.29934	-2.5102	-3.30637	1.3313	-5.80364	-0.296044	-3.58705	0.08463	-3.60209	1.6387			1.27088	-0.48006	-1.16214	-0.990178	-0.433398	-3.21643	6.11208	-0.304906	0.241794	-1.76159	0.755398	2.49354	7.80863	2.43755	-2.80172	2.65117	5.96357
1.8	4.44021	-0.61348	4.9951	-1.73767	-0.325612	-0.055874	0.758198	-1.30318	-2.48371	-3.30607	1.32887	-5.81706	-0.31801	-3.596	0.078456	-3.59617	1.37731			1.26631	-0.481222	-1.16521	-0.993468	-0.451192	-3.1927	6.15765	-0.294378	0.248304	-1.78678	0.759682	2.45228	7.81836	2.42766	-2.77596	2.66655	6.00741
1.802	4.44282	-0.644518	4.98575	-1.74315	-0.322336	-0.049364	0.721056	-1.29394	-2.49333	-3.32744	1.32542	-5.85596	-0.362404	-3.59995	0.0875	-3.60151	1.3257			1.23376	-0.477456	-1.14153	-1.00206	-0.471282	-3.19028	6.15997	-0.306992	0.206864	-1.80013	0.758618	2.44657	7.8455	2.44174	-2.82828	2.67751	6.01173
1.804	4.44989	-0.660674	4.98004	-1.74968	-0.313712	-0.031654	0.710416	-1.29104	-2.49833	-3.31526	1.34294	-5.88755	-0.37443	-3.61572	0.08862	-3.61267	1.40498			1.23579	-0.496538	-1.12946	-0.983206	-0.451864	-3.21765	6.1634	-0.31682	0.200242	-1.78465	0.75516	2.42976	7.88859	2.45974	-2.83249	2.62478	5.96431
1.806	4.43667	-0.63945	4.95331	-1.7417	-0.329308	-0.02177	0.719894	-1.28537	-2.51607	-3.32543	1.35495	-5.88494	-0.369726	-3.62466	0.079072	-3.65126	1.49071			1.27063	-0.506324	-1.12395	-0.974974	-0.477428	-3.22469	6.16762	-0.318346	0.20062	-1.78759	0.750652	2.45048	7.89009	2.48052	-2.81978	2.52692	5.93897
1.808	4.43183	-0.634662	4.9307	-1.74286	-0.334698	-0.069286	0.751632	-1.2644	-2.53474	-3.34373	1.36017	-5.89995	-0.383936	-3.63759	0.075446	-3.64879	1.50086			1.30606	-0.522704	-1.13141	-0.926338	-0.457338	-3.23534	6.14431	-0.346024	0.219968	-1.77667	0.744632	2.46443	7.90292	2.49924	-2.8331	2.46103	5.8991
1.81	4.47489	-0.60767	4.92773	-1.72999	-0.325276	-0.097244	0.817166	-1.28251	-2.5258	-3.35098	1.37038	-5.87318	-0.375172	-3.63331	0.068068	-3.65917	1.5055			1.3369	-0.522116	-1.11955	-0.952182	-0.462532	-3.21957	6.13745	-0.345254	0.232484	-1.80646	0.746396	2.48723	7.88515	2.4827	-2.80165	2.4113	5.92486
1.812	4.46257	-0.602266	4.97451	-1.7439	-0.31325	-0.071526	0.830116	-1.28433	-2.54605	-3.35517	1.37336	-5.8738	-0.373128	-3.62286	0.083678	-3.59079	1.5093			1.32198	-0.479598	-1.14908	-0.963956	-0.476896	-3.23616	6.12235	-0.330246	0.245322	-1.78924	0.742756	2.49428	7.83912	2.46992	-2.8371	2.43886	5.96989
1.814	4.43909	-0.624078	4.99272	-1.75463	-0.332668	-0.059248	0.836248	-1.29489	-2.52437	-3.34067	1.37123	-5.8345	-0.364336	-3.61442	0.079884	-3.61437	1.28631			1.31603	-0.492016	-1.16969	-0.977046	-0.438606	-3.23018	6.16162	-0.350196	0.24668	-1.78871	0.734048	2.45851	7.84997	2.4753	-2.79551	2.41242	5.96252
1.816	4.43115	-0.628362	5.01161	-1.74733	-0.329518	-0.027062	0.806288	-1.33473	-2.51777	-3.31793	1.36412	-5.8665	-0.362838	-3.59713	0.086828	-3.62018	1.45102			1.37298	-0.488488	-1.14197	-0.974386	-0.446362	-3.26985	6.19507	-0.327656	0.261114	-1.78557	0.730772	2.43412	7.866	2.48658	-2.84256	2.42943	5.96289
1.818	4.41342	-0.63735	5.02426	-1.75783	-0.311346	-0.01638	0.753872	-1.31538	-2.50583	-3.3552	1.3589	-5.8882	-0.372806	-3.60338	0.069888	-3.65025	1.34749			1.36325	-0.520842	-1.13099	-0.982632	-0.444276	-3.29195	6.24462	-0.30422	0.21889	-1.8361	0.735266	2.40554	7.88565	2.50079	-2.84012	2.46023	5.94325
1.82	4.45535	-0.627718	5.05142	-1.74723	-0.323624	-0.024682	0.705194	-1.31683	-2.52039	-3.35527	1.35195	-5.92518	-0.414078	-3.63047	0.07504	-3.67745	1.29438			1.31167	-0.498372	-1.12925	-0.976304	-0.445396	-3.30226	6.22035	-0.29029	0.251804	-1.82882	0.73493	2.39095	7.92887	2.51653	-2.8041	2.41443	5.93212
1.822	4.46657	-0.651196	5.04309	-1.73555	-0.329728	-0.048286	0.683466	-1.29606	-2.53652	-3.35709	1.3466	-5.9536	-0.438746	-3.64209	0.052052	-3.66548	1.30911			1.32353	-0.476238	-1.10333	-0.994	-0.455588	-3.29423	6.21453	-0.31318	0.225946	-1.80519	0.743162	2.39063	7.93142	2.52787	-2.81156	2.35032	5.93075
1.824	4.43446	-0.629188	5.03373	-1.73936	-0.34118	-0.060298	0.717878	-1.29812	-2.53817	-3.33278	1.35776	-5.96392	-0.4571	-3.64643	0.032242	-3.69331	1.04436			1.31891	-0.501438	-1.10319	-0.991802	-0.471324	-3.25483	6.2187	-0.3423	0.211344	-1.81383	0.754418	2.43877	7.9429	2.51614	-2.83921	2.3057	5.86103
1.826	4.43737	-0.655088	5.01152	-1.76527	-0.35238	-0.080066	0.740824	-1.29809	-2.5487	-3.35304	1.36133	-5.92869	-0.431606	-3.64277	0.042896	-3.71346	1.36632			1.36639	-0.512666	-1.08854	-0.971712	-0.468104	-3.25542	6.20999	-0.34398	0.222418	-1.81343	0.746158	2.46348	7.96145	2.51073	-2.84599	2.20279	5.85855
1.828	4.44917	-0.632562	4.99152	-1.7576	-0.336364	-0.073976	0.780794	-1.29205	-2.56396	-3.35804	1.38088	-5.91611	-0.447076	-3.64743	0.059024	-3.68725	1.39839			1.38194	-0.511742	-1.07843	-0.973266	-0.46508	-3.29645	6.20171	-0.358232	0.202006	-1.84142	0.740348	2.45785	7.93057	2.51618	-2.85047	2.16733	5.91822
1.83	4.46939	-0.648368	5.00259	-1.76786	-0.351162	-0.081298	0.792246	-1.30134	-2.5674	-3.34702	1.38972	-5.8732	-0.448406	-3.63453	0.085022	-3.66906	1.38816			1.41345	-0.510566	-1.08339	-0.963228	-0.458626	-3.28153	6.19921	-0.323316	0.23919	-1.83068	0.731822	2.40668	7.88673	2.5307	-2.8461	2.19332	5.96595
1.832	4.40791	-0.633066	5.01589	-1.76718	-0.35224	-0.071302	0.77917	-1.31788	-2.55004	-3.35458	1.38172	-5.8819	-0.432824	-3.62783	0.080584	-3.65429	1.35092			1.39	-0.487452	-1.10387	-0.980182	-0.453264	-3.27813	6.23879	-0.335076	0.251426	-1.85529	0.734594	2.36029	7.89295	2.54306	-2.85876	2.2402	5.95501
1.834	4.42026	-0.64211	5.04011	-1.75524	-0.334908	-0.083678	0.774998	-1.31727	-2.57428	-3.34774	1.39355	-5.92516	-0.420798	-3.63143	0.083398	-3.67396	1.11299			1.37995	-0.513156	-1.10736	-0.986566	-0.432348	-3.27391	6.25799	-0.316414	0.249298	-1.84964	0.746494	2.33678	7.91186	2.5607	-2.82925	2.2415	5.94289
1.836	4.45921	-0.625534	5.05799	-1.75374	-0.332178	-0.096096	0.7959	-1.30834	-2.55549	-3.34737	1.39905	-5.95976	-0.458864	-3.63782	0.070686	-3.70065	1.17477			1.39454	-0.508368	-1.09817	-0.998956	-0.459088	-3.28817	6.26725	-0.339276	0.241374	-1.84874	0.733614	2.35242	7.98497	2.5412	-2.85453	2.22331	5.90684
1.838	4.46006	-0.614166	5.08656	-1.75176	-0.314608	-0.101752	0.744142	-1.31865	-2.55556	-3.36795	1.38489	-5.97597	-0.46858	-3.6475	0.080668	-3.70163	1.1632			1.39616	-0.50085	-1.09861	-0.99393	-0.467866	-3.31965	6.31397	-0.292124	0.239512	-1.87303	0.72562	2.41102	7.98335	2.52491	-2.86107	2.14005	5.95458
1.84	4.47055	-0.641648	5.09629	-1.75304	-0.323918	-0.11823	0.724164	-1.31293	-2.54909	-3.35538	1.36949	-5.99003	-0.507934	-3.65421	0.053606	-3.70546	1.19172			1.42926	-0.503594	-1.07219	-0.997164	-0.460992	-3.31274	6.29363	-0.311598	0.222642	-1.87258	0.73255	2.43054	8.01616	2.53589	-2.835	2.0803	5.91836
1.842	4.49203	-0.6566	5.08208	-1.76683	-0.338338	-0.139048	0.730184	-1.29927	-2.56004	-3.36371	1.37298	-5.96739	-0.525644	-3.66661	0.024682	-3.73192	1.26396			1.3859	-0.524608	-1.07468	-1.00453	-0.440748	-3.29372	6.28849	-0.328776	0.228102	-1.84904	0.735168	2.40815	8.01707	2.55874	-2.81793	2.01968	5.89333
1.844	4.48168	-0.640276	5.08554	-1.78444	-0.362852	-0.152348	0.702576	-1.30824	-2.57957	-3.38099	1.36361	-5.96519	-0.477218	-3.66072	0.037632	-3.75168	1.28867			1.39359	-0.521948	-1.0604	-1.00664	-0.460796	-3.25902	6.28176	-0.348572	0.23492	-1.84061	0.733124	2.33765	7.96076	2.56805	-2.8383	1.92286	5.93138
1.846	4.49273	-0.633192	5.05281	-1.77594	-0.37009	-0.136164	0.766276	-1.3158	-2.57576	-3.37435	1.36717	-5.93046	-0.49518	-3.66909	0.070378	-3.73069	1.05683			1.39985	-0.532588	-1.02722	-0.999012	-0.459452	-3.26595	6.29244	-0.364028	0.230328	-1.8222	0.74284	2.29834	7.94969	2.59237	-2.86227	1.96281	5.87579
1.848	4.49473	-0.637868	5.05516	-1.77297	-0.352548	-0.114296	0.775026	-1.32348	-2.5957	-3.37775	1.37631	-5.95322	-0.483616	-3.65271	0.060172	-3.68378	1.06583			1.41294	-0.514948	-1.00961	-0.988554	-0.49182	-3.28	6.28828	-0.337176	0.235536	-1.86613	0.741916	2.32581	7.96172	2.57551	-2.85648	1.9992	5.91772
1.85	4.50685	-0.632604	5.02611	-1.7724	-0.3395	-0.113512	0.798014	-1.31102	-2.58588	-3.3797	1.37745	-5.99304	-0.47467	-3.65287	0.063462	-3.6862	1.2265			1.44551	-0.516782	-1.01583	-0.996688	-0.453894	-3.30499	6.27938	-0.326774	0.256564	-1.87104	0.735504	2.36316	7.98339	2.56196	-2.83074	2.011	5.93419
1.852	4.50268	-0.634998	5.04361	-1.75256	-0.348558	-0.12712	0.777616	-1.31481	-2.57439	-3.36934	1.38978	-5.99673	-0.492492	-3.65683	0.057708	-3.70261	1.17131			1.41698	-0.518448	-1.04875	-0.995736	-0.41986	-3.29969	6.29989	-0.32452	0.270648	-1.9328	0.737786	2.40386	7.99903	2.54502	-2.85573	2.01656	5.91577
1.854	4.49686	-0.635782	5.068	-1.76579	-0.346206	-0.15029	0.76825	-1.3148	-2.57901	-3.37007	1.39853	-6.0017	-0.522088	-3.65816	0.044912	-3.70541	0.88221			1.43762	-0.522088	-1.06424	-1.00862	-0.455126	-3.27179	6.33987	-0.324324	0.264586	-1.88285	0.7315	2.38554	8.01062	2.57015	-2.86835	1.96749	5.86417
1.856	4.4884	-0.62202	5.09316	-1.77604	-0.346486	-0.187236	0.782922	-1.33378	-2.56308	-3.37204	1.41534	-6.01859	-0.550648	-3.67002	0.041986	-3.73216	1.01928			1.43087	-0.498498	-1.06471	-1.03081	-0.467656	-3.26808	6.33933	-0.337778	0.237496	-1.89305	0.733502	2.35724	8.08209	2.59335	-2.85615	1.92119	5.9648
1.858	4.50549	-0.626906	5.10908	-1.78303	-0.381836	-0.19901	0.726446	-1.32835	-2.55069	-3.36792	1.41582	-6.01944	-0.57645	-3.69072	0.033796	-3.76305	1.04595			1.42923	-0.490728	-1.06299	-1.02217	-0.445872	-3.27093	6.38638	-0.32354	0.239288	-1.90238	0.73143	2.3277	8.06522	2.61185	-2.84911	1.8471	5.94457
1.86	4.51272	-0.632618	5.12086	-1.7772	-0.364644	-0.175896	0.712096	-1.32447	-2.5787	-3.40959	1.42325	-5.99274	-0.559202	-3.7038	0.031682	-3.76844	1.11013			1.45737	-0.516838	-1.05291	-1.02292	-0.471268	-3.30064	6.3945	-0.34349	0.24703	-1.88028	0.728168	2.30933	8.07222	2.61701	-2.89477	1.7759	5.88563
1.862	4.53321	-0.617204	5.13405	-1.783	-0.360654	-0.151662	0.71449	-1.29541	-2.58545	-3.40239	1.41095	-5.98494	-0.55027	-3.68927	0.039592	-3.78143	1.14474			1.44529	-0.52423	-1.03722	-1.02106	-0.452396	-3.3433	6.36499	-0.349594	0.245686	-1.88965	0.717472	2.31272	8.01329	2.62388	-2.84656	1.75871	5.94576
1.864	4.50054	-0.639884	5.13248	-1.77552	-0.367094	-0.12894	0.696738	-1.31909	-2.5915	-3.41004	1.40316	-5.9915	-0.556206	-3.67034	0.046606	-3.71626	1.11516			1.41274	-0.51996	-1.02914	-1.01199	-0.46025	-3.32759	6.36048	-0.364406	0.243418	-1.8929	0.720874	2.37188	8.02991	2.62268	-2.89216	1.773	5.92882
1.866	4.52525	-0.61453	5.1205	-1.77983	-0.39116	-0.13055	0.740558	-1.34043	-2.5954	-3.39858	1.38872	-6.01703	-0.559286	-3.67118	0.053844	-3.70458	1.11783			1.41102	-0.528528	-0.992698	-1.00813	-0.460852	-3.31591	6.34294	-0.359268	0.247352	-1.90901	0.722708	2.36943	8.03165	2.61495	-2.8434	1.8054	5.94327
1.868	4.51371	-0.616	5.09753	-1.77947	-0.366506	-0.143696	0.76573	-1.33336	-2.59787	-3.39924	1.38289	-6.0277	-0.526372	-3.67003	0.05705	-3.72833	1.07094			1.42031	-0.535192	-0.957166	-1.00674	-0.453964	-3.29918	6.35582	-0.366198	0.274596	-1.92121	0.722372	2.33397	8.06036	2.60613	-2.89059	1.82078	5.93747
1.87	4.53587	-0.618646	5.07749	-1.7843	-0.370524	-0.183442	0.759556	-1.31744	-2.59643	-3.39622	1.38643	-6.0626	-0.565992	-3.68288	0.027426	-3.76586	0.987308			1.45026	-0.525826	-1.00121	-1.0059	-0.418124	-3.30292	6.37794	-0.339612	0.284928	-1.95413	0.734846	2.29646	8.06712	2.61698	-2.85083	1.77255	5.93359
1.872	4.54966	-0.606592	5.06516	-1.7814	-0.357224	-0.217336	0.769132	-1.32747	-2.57005	-3.37872	1.40168	-6.09123	-0.611674	-3.70024	0.019208	-3.79014	0.92925			1.46513	-0.525574	-0.975044	-1.01549	-0.448672	-3.294	6.3847	-0.328188	0.262696	-1.9476	0.729988	2.27188	8.09904	2.63826	-2.88914	1.72907	5.94471
1.874	4.54996	-0.603036	5.11892	-1.79061	-0.363496	-0.226366	0.783328	-1.33106	-2.57691	-3.41125	1.4021	-6.06102	-0.625968	-3.71295	0.022876	-3.7889	0.912996			1.46969	-0.51744	-1.01135	-1.02711	-0.448112	-3.27578	6.42778	-0.342202	0.268884	-1.94051	0.72422	2.2647	8.10642	2.66144	-2.89481	1.65701	5.91048
1.876	4.57288	-0.633318	5.15565	-1.78797	-0.356426	-0.18858	0.776972	-1.32686	-2.58371	-3.39857	1.41428	-6.04132	-0.644868	-3.71953	0.04123	-3.81332	0.95718			1.45883	-0.487942	-1.03501	-1.04342	-0.44268	-3.28644	6.44078	-0.360234	0.24479	-1.93112	0.726936	2.2517	8.09453	2.66846	-2.86574	1.58738	5.89319
1.878	4.55503	-0.64491	5.16403	-1.77339	-0.354368	-0.189966	0.734818	-1.34042	-2.60189	-3.42191	1.42758	-6.01962	-0.623924	-3.70609	0.02926	-3.81563	0.98497			1.4765	-0.526834	-1.02124	-1.04759	-0.446712	-3.29123	6.44703	-0.363272	0.24766	-1.93123	0.718886	2.28	8.07685	2.681	-2.86807	1.54727	5.87629
1.88	4.5393	-0.635138	5.175	-1.76711	-0.38283	-0.193116	0.71498	-1.35038	-2.59764	-3.42878	1.43216	-6.04972	-0.634942	-3.69445	0.044758	-3.77058	1.02778			1.4887	-0.52801	-1.01336	-1.04966	-0.454804	-3.29577	6.44031	-0.34699	0.246134	-1.91579	0.723548	2.30367	8.06383	2.66556	-2.89757	1.56916	5.88237
1.882	4.5534	-0.654374	5.19702	-1.77783	-0.375312	-0.216538	0.724458	-1.31746	-2.59865	-3.43703	1.43557	-6.0566	-0.625688	-3.68964	0.046844	-3.77453	1.00457			1.48166	-0.532644	-1.00044	-1.04668	-0.447328	-3.3322	6.44192	-0.330596	0.264292	-1.90747	0.717864	2.30224	8.05718	2.65868	-2.89698	1.59372	5.93074
1.884	4.54882	-0.652918	5.19718	-1.78723	-0.377118	-0.215516	0.696388	-1.34163	-2.61726	-3.43416	1.42867	-6.07607	-0.606452	-3.69694	0.031906	-3.78336	0.9583			1.47346	-0.525518	-0.994238	-1.0382	-0.46186	-3.33696	6.44007	-0.353906	0.263214	-1.91827	0.716044	2.26493	8.08882	2.64118	-2.90734	1.55995	5.94433
1.886	4.54486	-0.646198	5.17555	-1.78275	-0.360626	-0.228382	0.731766	-1.35463	-2.62017	-3.43346	1.42982	-6.10694	-0.614488	-3.70574	0.004704	-3.81651	0.886494			1.46377	-0.518644	-0.94899	-1.02483	-0.456316	-3.33278	6.43679	-0.352758	0.306012	-1.95579	0.714924	2.23052	8.11506	2.65927	-2.90262	1.61547	5.91697
1.888	4.53779	-0.639744	5.17525	-1.78626	-0.362306	-0.235634	0.755244	-1.32488	-2.61352	-3.4181	1.42418	-6.12737	-0.668164	-3.72772	0.03339	-3.81543	0.735546			1.48263	-0.508186	-0.937314	-1.02117	-0.477092	-3.32619	6.43142	-0.3619	0.26208	-1.96066	0.71932	2.22008	8.14692	2.68293	-2.91333	1.56484	5.86418
1.89	4.52775	-0.645876	5.13664	-1.79196	-0.367808	-0.232386	0.766206	-1.33581	-2.61076	-3.41571	1.41054	-6.10926	-0.703514	-3.73701	0.048846	-3.82311	0.792652			1.47255	-0.52661	-0.936068	-1.02976	-0.455462	-3.304	6.44823	-0.357336	0.27811	-1.94537	0.716954	2.18672	8.17803	2.70808	-2.93724	1.49244	5.88274
1.892	4.53538	-0.657286	5.13626	-1.78367	-0.378112	-0.227304	0.770238	-1.31433	-2.61337	-3.43311	1.40182	-6.11002	-0.746186	-3.74364	0.045822	-3.84931	0.765926			1.48732	-0.51737	-0.92477	-1.05834	-0.464688	-3.33273	6.46255	-0.32655	0.268338	-1.97457	0.715806	2.20522	8.18266	2.72149	-2.92655	1.39528	5.90369
1.894	4.54537	-0.62923	5.15719	-1.77164	-0.377608	-0.19985	0.790272	-1.33673	-2.59627	-3.44109	1.41092	-6.0874	-0.720426	-3.72778	0.06251	-3.8438	0.832902			1.50361	-0.490196	-0.961912	-1.06302	-0.45192	-3.34194	6.47592	-0.355684	0.256998	-1.9691	0.726446	2.21239	8.14762	2.72898	-2.93747	1.3249	5.85952
1.896	4.57748	-0.676914	5.18644	-1.78626	-0.367598	-0.196966	0.78204	-1.33659	-2.60582	-3.44366	1.41439	-6.08507	-0.735056	-3.71686	0.043512	-3.84426	0.873712			1.50562	-0.525854	-0.996212	-1.06555	-0.48881	-3.33976	6.49106	-0.346864	0.246526	-1.94718	0.7336	2.24225	8.12756	2.71379	-2.92956	1.32425	5.83005
1.898	4.58308	-0.643678	5.20946	-1.79568	-0.363902	-0.222824	0.774312	-1.35887	-2.64746	-3.4579	1.41597	-6.09154	-0.707672	-3.71805	0.055846	-3.80874	0.888384			1.49374	-0.518756	-0.982982	-1.06026	-0.477148	-3.31435	6.50532	-0.37485	0.259686	-1.93624	0.726782	2.23364	8.12808	2.70427	-2.89323	1.35985	5.86495
1.9	4.55508	-0.668836	5.24283	-1.80156	-0.377622	-0.268506	0.72877	-1.35113	-2.643	-3.46228	1.433	-6.13239	-0.701764	-3.71533	0.03857	-3.78727	0.579348			1.52972	-0.513856	-0.968184	-1.04978	-0.486192	-3.29363	6.50784	-0.360766	0.250278	-1.94408	0.723926	2.18845	8.13805	2.69307	-2.90993	1.35633	5.85987
1.902	4.56366	-0.664888	5.27376	-1.79763	-0.360682	-0.297738	0.693448	-1.37234	-2.64072	-3.43466	1.44053	-6.149	-0.725732	-3.7193	0.022288	-3.81021	0.810376			1.50494	-0.498218	-0.952658	-1.04251	-0.479192	-3.28496	6.51444	-0.36302	0.262738	-1.96591	0.709576	2.16524	8.15265	2.71037	-2.9482	1.40694	5.93877
1.904	4.59358	-0.657538	5.25783	-1.813	-0.369614	-0.277074	0.700196	-1.34754	-2.61751	-3.45318	1.44409	-6.1902	-0.767732	-3.73181	0.029176	-3.84282	0.749966			1.49467	-0.499352	-0.95025	-1.05353	-0.483224	-3.32098	6.49855	-0.361284	0.288218	-1.9769	0.712348	2.13973	8.19095	2.72678	-2.94825	1.35888	5.92871
1.906	4.55497	-0.647094	5.24107	-1.79873	-0.367332	-0.2583	0.738374	-1.37084	-2.64888	-3.44929	1.4504	-6.17607	-0.776076	-3.74875	0.032452	-3.84587	0.719194			1.51241	-0.509628	-0.944412	-1.05003	-0.487704	-3.31983	6.50713	-0.356776	0.271656	-1.99389	0.714546	2.13034	8.18944	2.75863	-2.96156	1.28835	5.91696
1.908	4.58703	-0.66878	5.22432	-1.79113	-0.38472	-0.236642	0.776594	-1.3608	-2.6265	-3.42664	1.44866	-6.15026	-0.814828	-3.7546	0.061978	-3.84716	0.622314			1.47035	-0.503104	-0.908152	-1.06194	-0.491106	-3.34383	6.508	-0.387996	0.277158	-1.97457	0.707294	2.14241	8.23544	2.76717	-2.96465	1.23187	5.90682
1.91	4.575	-0.662494	5.2135	-1.79985	-0.404628	-0.248052	0.760802	-1.34938	-2.61782	-3.45465	1.44624	-6.15765	-0.79632	-3.75995	0.030492	-3.86544	0.64764			1.49492	-0.4991	-0.894768	-1.0689	-0.447972	-3.35297	6.51344	-0.365078	0.269822	-1.98113	0.704466	2.14227	8.21866	2.76662	-2.92839	1.12451	5.88596
1.912	4.55409	-0.653912	5.21154	-1.80676	-0.385658	-0.254226	0.753452	-1.34737	-2.627	-3.46088	1.43668	-6.14093	-0.806148	-3.7483	0.039326	-3.87181	0.715764			1.50277	-0.483322	-0.89488	-1.07239	-0.478324	-3.3623	6.54219	-0.357238	0.272076	-1.98915	0.709072	2.14523	8.19085	2.76581	-2.95921	1.07897	5.84396
1.914	4.56571	-0.65975	5.20482	-1.8151	-0.381248	-0.280518	0.747222	-1.34341	-2.63402	-3.45394	1.42223	-6.14646	-0.799302	-3.74102	0.056294	-3.84576	0.731906			1.51126	-0.451612	-0.902062	-1.08941	-0.480452	-3.35118	6.55369	-0.350392	0.256508	-1.9783	0.708862	2.163	8.16535	2.75817	-2.96388	1.05767	5.83649
1.916	4.59561	-0.674394	5.2387	-1.82367	-0.377482	-0.276458	0.773164	-1.3477	-2.64629	-3.46979	1.42839	-6.15275	-0.792274	-3.73689	0.02779	-3.80566	0.729358			1.52877	-0.499842	-0.955612	-1.08844	-0.48202	-3.33819	6.58356	-0.367402	0.25795	-1.97611	0.717262	2.15188	8.18605	2.74673	-2.97766	1.09607	5.85585
1.918	4.61863	-0.652792	5.25662	-1.82718	-0.357924	-0.283808	0.72303	-1.35799	-2.6654	-3.45402	1.42516	-6.179	-0.787598	-3.72254	0.015288	-3.81727	0.709324			1.51669	-0.492324	-0.949242	-1.08245	-0.495782	-3.34572	6.59274	-0.367304	0.263466	-1.98461	0.724304	2.11187	8.20439	2.75202	-2.94515	1.15066	5.92579
1.92	4.60565	-0.673134	5.2737	-1.82448	-0.370244	-0.261226	0.66269	-1.35772	-2.67826	-3.47885	1.42932	-6.20523	-0.813652	-3.74087	0.032998	-3.83424	0.680414			1.54458	-0.50792	-0.952602	-1.07941	-0.481712	-3.3291	6.62564	-0.381948	0.245854	-2.00364	0.721812	2.09226	8.23364	2.76798	-2.94938	1.17522	5.90244
1.922	4.58717	-0.660422	5.28753	-1.81355	-0.375298	-0.261268	0.68103	-1.35696	-2.6591	-3.46402	1.43546	-6.23662	-0.864528	-3.7623	0.02142	-3.86613	0.611632			1.54276	-0.522606	-0.931546	-1.05893	-0.478142	-3.34125	6.64413	-0.369614	0.278642	-2.00529	0.713384	2.07049	8.26189	2.79364	-2.97207	1.1376	5.88259
1.924	4.62293	-0.639548	5.30337	-1.81826	-0.37898	-0.28336	0.696164	-1.37021	-2.67182	-3.46248	1.44833	-6.21174	-0.888832	-3.77311	0.045402	-3.85146	0.320866			1.51091	-0.5068	-0.922698	-1.07468	-0.482664	-3.32242	6.60468	-0.372218	0.28168	-2.01082	0.706846	2.0655	8.26662	2.80941	-2.98458	1.0464	5.79221
1.926	4.61121	-0.66381	5.31444	-1.82364	-0.399154	-0.278754	0.702814	-1.36163	-2.67058	-3.46426	1.46765	-6.19133	-0.881692	-3.78657	0.054292	-3.85689	0.520884			1.51668	-0.499884	-0.917994	-1.09393	-0.467026	-3.30768	6.62353	-0.372512	0.292656	-2.02546	0.704578	2.11175	8.27029	2.81715	-2.9301	0.970984	5.84909
1.928	4.64584	-0.642292	5.27358	-1.81705	-0.407708	-0.303464	0.727412	-1.37988	-2.66967	-3.47561	1.47097	-6.18681	-0.863366	-3.77125	0.064064	-3.83999	0.45885			1.53537	-0.498708	-0.86324	-1.09497	-0.486122	-3.30553	6.59831	-0.396088	0.267512	-2.02409	0.703304	2.09957	8.26241	2.81847	-2.98894	0.90727	5.86858
1.93	4.63861	-0.637238	5.26198	-1.82444	-0.414652	-0.31178	0.720902	-1.3628	-2.66146	-3.46788	1.47409	-6.19178	-0.850192	-3.76729	0.08239	-3.8438	0.506212			1.50766	-0.50176	-0.858004	-1.11198	-0.48769	-3.34837	6.59974	-0.375802	0.271306	-1.99809	0.699132	2.13227	8.23292	2.80363	-2.99446	0.843332	5.85182
1.932	4.6236	-0.63714	5.25696	-1.83344	-0.387856	-0.309722	0.707938	-1.36926	-2.67877	-3.47283	1.47882	-6.19501	-0.865956	-3.7619	0.062482	-3.80708	0.552104			1.55403	-0.496188	-0.848974	-1.1076	-0.475076	-3.35972	6.62032	-0.357014	0.26082	-2.03181	0.686504	2.10053	8.244	2.78881	-2.97027	0.859852	5.81476
1.934	4.62776	-0.679042	5.23992	-1.8226	-0.372204	-0.322518	0.70119	-1.36459	-2.68736	-3.48676	1.46657	-6.22444	-0.840448	-3.75304	0.027524	-3.79924	0.581182			1.57227	-0.476924	-0.852026	-1.10145	-0.478156	-3.3476	6.6374	-0.356706	0.270886	-2.00759	0.690858	2.04785	8.283	2.79504	-2.96002	0.902622	5.79506
1.936	4.62574	-0.669214	5.27964	-1.82948	-0.364994	-0.325192	0.719712	-1.36311	-2.6976	-3.4824	1.45538	-6.24954	-0.871248	-3.76001	0.011382	-3.84908	0.450926			1.57797	-0.506352	-0.895314	-1.11065	-0.499926	-3.33397	6.67737	-0.341376	0.255892	-1.99931	0.69818	2.03291	8.30242	2.80938	-2.97437	0.928354	5.78871
1.938	4.62846	-0.666568	5.29616	-1.83547	-0.364042	-0.322882	0.689304	-1.37887	-2.69938	-3.48569	1.45488	-6.26142	-0.912002	-3.76704	0.010332	-3.833	0.52017			1.56793	-0.523054	-0.897554	-1.10886	-0.504966	-3.34279	6.68178	-0.374346	0.256088	-1.99934	0.692566	2.01883	8.32096	2.83025	-2.95771	0.934598	5.85633
1.94	4.61768	-0.661332	5.32963	-1.84213	-0.393666	-0.266812	0.669718	-1.39824	-2.70112	-3.48673	1.44767	-6.24562	-0.930356	-3.78998	0.043372	-3.85399	0.459312			1.59078	-0.524272	-0.887152	-1.10361	-0.510244	-3.37154	6.66565	-0.377398	0.253568	-2.0397	0.697256	2.01271	8.36578	2.85071	-2.95228	0.870842	5.81963
1.942	4.62252	-0.658728	5.33721	-1.84545	-0.399294	-0.276542	0.647318	-1.38648	-2.69433	-3.48264	1.4525	-6.22369	-0.940576	-3.80279	0.073374	-3.82361	0.385406			1.57476	-0.52731	-0.871486	-1.10858	-0.500626	-3.3958	6.67992	-0.390096	0.28462	-2.06878	0.71344	2.01816	8.35254	2.85691	-2.94902	0.778932	5.84856
1.944	4.65212	-0.658224	5.34878	-1.82935	-0.405468	-0.293902	0.642348	-1.37222	-2.70724	-3.48425	1.45663	-6.19797	-0.925848	-3.80065	0.062342	-3.83904	0.350896			1.54118	-0.549668	-0.862442	-1.09977	-0.491344	-3.35503	6.6695	-0.382494	0.285138	-2.0694	0.712362	2.03133	8.3064	2.83759	-2.98841	0.668668	5.8252
1.946	4.65997	-0.652344	5.33301	-1.8453	-0.419468	-0.350756	0.688072	-1.3953	-2.67436	-3.45696	1.47463	-6.21414	-0.957222	-3.78501	0.03535	-3.7938	0.32284			1.51388	-0.5264	-0.827834	-1.11226	-0.489202	-3.35006	6.65225	-0.391482	0.289856	-2.0483	0.705712	2.06144	8.29529	2.82768	-2.9924	0.617386	5.8213
1.948	4.68286	-0.651462	5.30988	-1.82941	-0.415632	-0.361844	0.695618	-1.37483	-2.67868	-3.45061	1.47323	-6.22383	-0.937846	-3.77846	0.02828	-3.76741	0.350742			1.53259	-0.51975	-0.83279	-1.11352	-0.507318	-3.32802	6.66471	-0.407666	0.25956	-2.04393	0.695254	2.05804	8.28443	2.84693	-3.00817	0.64792	5.81994
1.95	4.65874	-0.649376	5.30345	-1.81609	-0.4137	-0.332514	0.671202	-1.39832	-2.69618	-3.49126	1.47528	-6.2586	-0.924364	-3.76005	0.0077	-3.76194	0.469308			1.53719	-0.513212	-0.786548	-1.13305	-0.478506	-3.3563	6.68472	-0.396438	0.242382	-2.05542	0.693728	1.99216	8.33764	2.86014	-2.9948	0.659946	5.68859
1.952	4.63399	-0.626724	5.29005	-1.82861	-0.395948	-0.338408	0.677208	-1.38328	-2.70908	-3.48614	1.48434	-6.2799	-0.916818	-3.76937	0.017444	-3.77653	0.451542			1.60562	-0.49756	-0.807142	-1.12837	-0.494088	-3.38681	6.70652	-0.386652	0.26005	-2.03427	0.687386	1.9588	8.34963	2.85205	-3.02368	0.709982	5.76097
1.954	4.62547	-0.666442	5.30537	-1.83439	-0.38927	-0.308434	0.649656	-1.38113	-2.73577	-3.49814	1.48348	-6.28508	-0.9548	-3.79922	-0.004634	-3.79621	0.408338			1.60224	-0.52423	-0.834904	-1.12752	-0.465668	-3.41488	6.69757	-0.37492	0.263326	-2.03224	0.683396	1.96123	8.38426	2.85326	-3.01928	0.696794	5.85056
1.956	4.65994	-0.665238	5.35004	-1.83364	-0.365596	-0.314398	0.661038	-1.36816	-2.71517	-3.50843	1.48261	-6.27385	-0.986818	-3.79956	0.026516	-3.81336	0.389032			1.61141	-0.5334	-0.880292	-1.12309	-0.4767	-3.40876	6.74041	-0.38605	0.278222	-2.02341	0.67886	1.96239	8.40602	2.84733	-2.99618	0.650118	5.87703
1.958	4.64544	-0.678888	5.35601	-1.85878	-0.403116	-0.326186	0.655942	-1.37182	-2.71359	-3.516	1.4772	-6.28138	-1.01836	-3.79716	0.038836	-3.79303	0.3542			1.60717	-0.53452	-0.876554	-1.11707	-0.486892	-3.40199	6.74652	-0.39473	0.261856	-2.03036	0.677026	1.96102	8.39744	2.8518	-3.00889	0.531244	5.81224
1.96	4.63758	-0.658714	5.40828	-1.8438	-0.406826	-0.34209	0.641172	-1.38688	-2.73269	-3.51817	1.47071	-6.23645	-1.02852	-3.80358	0.05586	-3.77909	0.27335			1.62144	-0.563612	-0.84882	-1.11292	-0.490714	-3.40361	6.75248	-0.389452	0.280952	-2.07638	0.690466	1.96123	8.41343	2.86579	-3.00167	0.473438	5.794
1.962	4.68062	-0.65149	5.39823	-1.84698	-0.422268	-0.359408	0.679434	-1.40186	-2.7343	-3.51051	1.46083	-6.26527	-1.03109	-3.80019	0.055636	-3.7527	0.223664			1.61858	-0.559748	-0.836388	-1.11728	-0.489006	-3.36284	6.7304	-0.388346	0.28826	-2.08503	0.679742	1.99769	8.35597	2.88401	-2.98483	0.502908	5.76771
1.964	4.70532	-0.653086	5.39385	-1.82399	-0.410732	-0.359828	0.65366	-1.39787	-2.72987	-3.50091	1.45606	-6.28383	-1.01627	-3.80891	0.054474	-3.74002	0.240464			1.612	-0.537152	-0.828422	-1.14274	-0.488922	-3.39961	6.76493	-0.383432	0.290962	-2.07913	0.681562	1.9906	8.34196	2.89499	-2.9968	0.44156	5.77265
1.966	4.71895	-0.644252	5.3797	-1.83485	-0.398468	-0.350336	0.68649	-1.39944	-2.71621	-3.49821	1.45681	-6.28737	-0.991508	-3.7912	0.023758	-3.71867	0.328454			1.54372	-0.540932	-0.799834	-1.14701	-0.484302	-3.4014	6.7487	-0.381794	0.286874	-2.08718	0.685118	1.98141	8.36053	2.88795	-3.00804	0.455532	5.76281
1.968	4.72767	-0.642488	5.37305	-1.83529	-0.4032	-0.329266	0.69426	-1.37844	-2.73008	-3.49749	1.46758	-6.30435	-1.00405	-3.78722	0.009702	-3.70353	0.32221			1.54175	-0.524188	-0.78897	-1.14909	-0.468146	-3.37362	6.73898	-0.412986	0.280182	-2.10105	0.688506	1.92763	8.39472	2.87988	-3.02051	0.476252	5.75848
1.97	4.71212	-0.636762	5.36179	-1.83946	-0.3899	-0.340396	0.686056	-1.39427	-2.73729	-3.4867	1.47382	-6.32797	-1.03638	-3.78531	-0.001274	-3.76281	0.312382			1.57983	-0.528262	-0.802704	-1.14254	-0.479598	-3.39808	6.76234	-0.415688	0.271096	-2.07669	0.68642	1.89426	8.44858	2.87431	-3.00451	0.536326	5.79656
1.972	4.67547	-0.6727	5.35653	-1.84888	-0.392854	-0.358694	0.658602	-1.41884	-2.74693	-3.49954	1.4873	-6.34931	-1.06553	-3.79767	0.029624	-3.7589	0.005236			1.60416	-0.494522	-0.80409	-1.14946	-0.49091	-3.39902	6.76903	-0.382634	0.286594	-2.07035	0.67571	1.89091	8.45809	2.88273	-3.045	0.455756	5.67185
1.974	4.67085	-0.690648	5.37887	-1.85868	-0.403774	-0.355348	0.632562	-1.37574	-2.78289	-3.51616	1.4989	-6.32461	-1.08566	-3.81805	0.04487	-3.74924	0.252462			1.63115	-0.533736	-0.82775	-1.14097	-0.478436	-3.40687	6.78796	-0.397376	0.2898	-2.07575	0.673344	1.87442	8.46419	2.90018	-3.03282	0.380408	5.80366
1.976	4.67253	-0.703066	5.38345	-1.85513	-0.395822	-0.377972	0.655564	-1.38152	-2.75691	-3.53277	1.48659	-6.29082	-1.10538	-3.83369	0.01981	-3.73568	-0.10591			1.62707	-0.523236	-0.839244	-1.14849	-0.496944	-3.41265	6.79791	-0.387506	0.28217	-2.07719	0.667478	1.90368	8.46863	2.92071	-3.03108	0.322168	5.6971
1.978	4.69931	-0.682458	5.39238	-1.85394	-0.404838	-0.360206	0.644504	-1.39489	-2.73409	-3.53336	1.50196	-6.2949	-1.12218	-3.82126	0.045136	-3.73054	0.117054			1.60793	-0.54453	-0.79968	-1.1485	-0.486808	-3.36253	6.81918	-0.39025	0.291648	-2.10657	0.6699	1.9187	8.44182	2.92958	-3.11	0.235424	5.74225
1.98	4.76462	-0.6846	5.41698	-1.84643	-0.412454	-0.369684	0.656572	-1.39811	-2.76427	-3.52905	1.49936	-6.31414	-1.07222	-3.80953	0.030926	-3.70293	0.065212			1.59814	-0.537222	-0.797034	-1.14881	-0.505246	-3.34554	6.82555	-0.412384	0.294182	-2.11471	0.66451	1.93717	8.41352	2.92138	-3.06834	0.279118	5.70987
1.982	4.76232	-0.66892	5.42283	-1.85245	-0.40943	-0.398804	0.678482	-1.4212	-2.75297	-3.51737	1.49155	-6.33364	-1.06831	-3.80806	0.024486	-3.66009	0.120722			1.55546	-0.560294	-0.789502	-1.16274	-0.501368	-3.35171	6.83108	-0.4088	0.282184	-2.08683	0.665532	1.91386	8.43146	2.91596	-3.05451	0.280434	5.74444
1.984	4.77697	-0.672742	5.42678	-1.84829	-0.419104	-0.363034	0.698096	-1.3949	-2.74329	-3.51737	1.48505	-6.35863	-1.07324	-3.80892	0.035742	-3.69106	0.14546			1.50906	-0.52948	-0.771288	-1.16082	-0.497518	-3.39273	6.82696	-0.397642	0.29358	-2.09086	0.667702	1.87179	8.46859	2.90613	-3.08329	0.29071	5.68064
1.986	4.80936	-0.674982	5.38427	-1.8583	-0.391552	-0.369474	0.726306	-1.41625	-2.75835	-3.53125	1.47098	-6.36387	-1.09451	-3.81458	0.01554	-3.71318	0.151508			1.49932	-0.527366	-0.739074	-1.17562	-0.479696	-3.41666	6.82857	-0.408632	0.280406	-2.11009	0.675346	1.85249	8.47011	2.90732	-3.04699	0.273014	5.70692
1.988	4.77851	-0.65639	5.36883	-1.86091	-0.397026	-0.388458	0.7077	-1.41992	-2.75394	-3.52727	1.47162	-6.37664	-1.12811	-3.82911	0.019558	-3.71956	-0.165116			1.56055	-0.509488	-0.719992	-1.17881	-0.475454	-3.39086	6.8441	-0.391216	0.274932	-2.10641	0.67193	1.83322	8.5064	2.9281	-3.041	0.258692	5.65517
1.99	4.76357	-0.648242	5.36277	-1.86255	-0.397908	-0.394772	0.66682	-1.41044	-2.77266	-3.54239	1.4757	-6.3398	-1.15713	-3.83631	0.016506	-3.71486	-0.190736			1.58208	-0.508816	-0.717976	-1.16745	-0.4802	-3.40269	6.84502	-0.388164	0.291466	-2.10046	0.68362	1.86715	8.52232	2.95264	-3.07859	0.218036	5.68371
1.992	4.74424	-0.685888	5.37123	-1.86987	-0.40831	-0.41867	0.621306	-1.43956	-2.78974	-3.52461	1.49085	-6.31681	-1.15366	-3.84049	0.025032	-3.69697	-0.223286			1.63736	-0.500794	-0.734314	-1.17169	-0.497098	-3.39731	6.85136	-0.402234	0.279258	-2.08407	0.68397	1.8564	8.50347	2.97259	-3.07989	0.166978	5.63343
1.994	4.72116	-0.68922	5.44789	-1.85597	-0.411026	-0.441406	0.592158	-1.41315	-2.79245	-3.56717	1.48288	-6.32047	-1.15174	-3.85302	0.028462	-3.66272	0.0063			1.67089	-0.511266	-0.770672	-1.15857	-0.493584	-3.42013	6.84543	-0.399742	0.275996	-2.12111	0.673932	1.85216	8.46028	2.98589	-3.07891	0.052752	5.71355
1.996	4.74804	-0.670978	5.44111	-1.85305	-0.42315	-0.444318	0.62062	-1.40251	-2.78978	-3.55051	1.49463	-6.338	-1.15672	-3.84691	0.019992	-3.63359	-0.289114			1.65402	-0.536298	-0.78505	-1.16425	-0.48426	-3.42051	6.87477	-0.410144	0.295596	-2.13422	0.662186	1.8831	8.44112	2.98901	-3.07566	-0.022176	5.62948
1.998	4.75184	-0.66619	5.44452	-1.86501	-0.41328	-0.432278	0.660338	-1.41022	-2.79443	-3.56292	1.50605	-6.3301	-1.13613	-3.83723	0.01967	-3.60301	-0.103194			1.62435	-0.545594	-0.751282	-1.17831	-0.490854	-3.40844	6.87655	-0.404418	0.30198	-2.14161	0.655606	1.84961	8.47129	2.96604	-3.09954	0.040992	5.65041
2	4.78619	-0.6643	5.46679	-1.85672	-0.408506	-0.399504	0.69944	-1.40777	-2.80265	-3.55145	1.51654	-6.37342	-1.1109	-3.82815	-0.01589	-3.57904	-0.077728			1.55483	-0.564662	-0.743708	-1.18275	-0.51457	-3.39842	6.88068	-0.400526	0.290794	-2.16607	0.656544	1.80865	8.51141	2.9604	-3.08242	0.043806	5.70116
2.002	4.78633	-0.667072	5.47826	-1.8765	-0.415492	-0.403368	0.734804	-1.41541	-2.7901	-3.57119	1.52531	-6.39345	-1.13011	-3.83075	-0.006762	-3.60024	0.021014			1.57846	-0.55048	-0.75502	-1.19462	-0.505414	-3.41883	6.88023	-0.424788	0.280882	-2.12328	0.651938	1.76729	8.53678	2.94596	-3.09775	0.077602	5.66331
2.004	4.81561	-0.69223	5.44729	-1.86929	-0.38402	-0.427504	0.776356	-1.41778	-2.78533	-3.5566	1.52212	-6.39925	-1.16236	-3.83132	0.005138	-3.6386	0.011088			1.61309	-0.560518	-0.728112	-1.19343	-0.517412	-3.44743	6.86315	-0.400624	0.295428	-2.13494	0.646996	1.76296	8.54997	2.96472	-3.07072	0.040026	5.68135
2.006	4.7992	-0.69398	5.4304	-1.87659	-0.403074	-0.459298	0.731416	-1.41575	-2.78355	-3.57832	1.50447	-6.3821	-1.22648	-3.85554	0.042	-3.6233	0.010752			1.60006	-0.5425	-0.704018	-1.18961	-0.475174	-3.38139	6.89653	-0.411866	0.278936	-2.1285	0.648872	1.79235	8.54566	2.99117	-3.09422	0.020216	5.70643
2.008	4.79731	-0.652722	5.42784	-1.87242	-0.427098	-0.478296	0.66416	-1.40657	-2.80237	-3.54168	1.49783	-6.37482	-1.2087	-3.86298	0.02093	-3.6189	-0.380632			1.63548	-0.537586	-0.693084	-1.18644	-0.48181	-3.38418	6.92185	-0.40971	0.29183	-2.14336	0.647248	1.79969	8.5371	3.01246	-3.04431	-0.038234	5.66555
2.01	4.77245	-0.685342	5.43962	-1.8803	-0.430374	-0.460782	0.604926	-1.39166	-2.81406	-3.56282	1.49069	-6.3546	-1.21751	-3.86714	0.027398	-3.60101	-0.36393			1.67135	-0.479444	-0.689486	-1.19357	-0.493206	-3.3886	6.91172	-0.412986	0.299082	-2.1126	0.66038	1.80216	8.49052	3.02785	-3.08301	-0.153538	5.59941
2.012	4.78748	-0.67207	5.44761	-1.87533	-0.418824	-0.460782	0.586236	-1.42888	-2.82006	-3.58705	1.49918	-6.35649	-1.20532	-3.86569	0.043596	-3.56437	-0.146006			1.66844	-0.544782	-0.701386	-1.18229	-0.5278	-3.42573	6.934	-0.419132	0.279062	-2.13896	0.663362	1.79893	8.4756	3.02995	-3.14825	-0.234906	5.67428
2.014	4.75098	-0.701568	5.47294	-1.88427	-0.402052	-0.43134	0.59367	-1.43051	-2.81096	-3.58788	1.49957	-6.38173	-1.20665	-3.85965	-0.00189	-3.54297	-0.20062			1.67516	-0.55951	-0.75425	-1.18178	-0.514486	-3.45384	6.9649	-0.409066	0.310772	-2.14169	0.67326	1.80008	8.52914	3.0128	-3.12158	-0.176904	5.63394
2.016	4.77126	-0.683564	5.45348	-1.87452	-0.397558	-0.424466	0.65352	-1.42129	-2.80412	-3.59677	1.49618	-6.38401	-1.25037	-3.84294	-0.004382	-3.52729	-0.23814			1.65123	-0.56504	-0.755468	-1.18034	-0.513996	-3.48169	6.94673	-0.421428	0.338282	-2.14234	0.662662	1.76421	8.56103	3.00076	-3.1136	-0.170982	5.61673
2.018	4.78792	-0.666736	5.46804	-1.8719	-0.386694	-0.449358	0.696514	-1.41544	-2.81495	-3.58896	1.51152	-6.41917	-1.24307	-3.85678	0.009506	-3.53207	-0.182154			1.66327	-0.559426	-0.723646	-1.18168	-0.502936	-3.44726	6.94459	-0.39123	0.323554	-2.15992	0.660898	1.72724	8.56898	3.00163	-3.10381	-0.141442	5.62639
2.02	4.77145	-0.665308	5.48456	-1.88226	-0.377216	-0.493472	0.725284	-1.41715	-2.79601	-3.57498	1.52837	-6.41467	-1.26801	-3.85539	0.017836	-3.54392	-0.122402			1.65864	-0.552776	-0.687526	-1.20331	-0.511112	-3.40507	6.94049	-0.406112	0.302456	-2.17794	0.647654	1.71713	8.60342	3.02632	-3.1121	-0.122234	5.61579
2.022	4.76888	-0.68936	5.49504	-1.87128	-0.40978	-0.476	0.73493	-1.41092	-2.7937	-3.56864	1.54027	-6.41796	-1.30463	-3.87111	0.041412	-3.56401	-0.41342			1.68217	-0.568638	-0.686616	-1.20529	-0.48804	-3.40057	6.9508	-0.411964	0.291536	-2.17106	0.646142	1.71879	8.61057	3.04116	-3.12869	-0.159628	5.52245
2.024	4.79193	-0.693784	5.49591	-1.85702	-0.410242	-0.501788	0.712194	-1.43258	-2.80381	-3.59878	1.54536	-6.40366	-1.34264	-3.88963	0.049476	-3.52762	-0.102914			1.70044	-0.575652	-0.659246	-1.20569	-0.51786	-3.41155	6.96595	-0.41776	0.293006	-2.18007	0.643356	1.71325	8.6106	3.05823	-3.17878	-0.223146	5.66644
2.026	4.79535	-0.674478	5.46846	-1.8741	-0.425334	-0.478464	0.675668	-1.42295	-2.82762	-3.58624	1.54025	-6.40027	-1.29945	-3.89456	0.03682	-3.4946	-0.152278			1.67689	-0.517566	-0.62986	-1.20924	-0.497714	-3.43987	6.98981	-0.411712	0.27818	-2.18977	0.640234	1.70887	8.54424	3.07352	-3.14551	-0.316526	5.69253
2.028	4.78155	-0.683662	5.47182	-1.87715	-0.440454	-0.45213	0.609126	-1.41995	-2.82933	-3.59541	1.53363	-6.40464	-1.30438	-3.88221	0.016506	-3.44611	-0.503202			1.66935	-0.509754	-0.640094	-1.19602	-0.489412	-3.45019	7.0126	-0.412678	0.28217	-2.1901	0.633192	1.73965	8.56271	3.06464	-3.1549	-0.40614	5.51142
2.03	4.80348	-0.680932	5.45958	-1.88341	-0.436744	-0.462546	0.570136	-1.41947	-2.84005	-3.59232	1.5317	-6.39689	-1.31177	-3.86448	0.004998	-3.42255	-0.556304			1.67643	-0.536788	-0.663292	-1.19284	-0.491974	-3.46269	7.02512	-0.408534	0.302764	-2.15053	0.639604	1.74493	8.60625	3.05383	-3.16435	-0.464534	5.50781
2.032	4.76669	-0.688548	5.49324	-1.88622	-0.42182	-0.476742	0.578186	-1.41943	-2.81327	-3.60829	1.52754	-6.43818	-1.31079	-3.87153	0.022456	-3.38505	-0.295246			1.69833	-0.565362	-0.677264	-1.18782	-0.514444	-3.45222	7.01586	-0.425264	0.325304	-2.17468	0.65072	1.72754	8.62625	3.04268	-3.16926	-0.397292	5.60531
2.034	4.7901	-0.707574	5.48587	-1.89329	-0.408968	-0.470918	0.603764	-1.43675	-2.83686	-3.61301	1.5135	-6.45102	-1.30848	-3.87052	0.029498	-3.39002	-0.368578			1.69806	-0.567336	-0.698992	-1.19053	-0.521808	-3.46198	7.00591	-0.43176	0.333466	-2.19355	0.64862	1.68391	8.60782	3.03069	-3.1656	-0.411866	5.57784
2.036	4.80304	-0.696024	5.49419	-1.8796	-0.385294	-0.517076	0.667128	-1.43137	-2.8323	-3.61736	1.52044	-6.46218	-1.34802	-3.8786	0.033264	-3.40635	-0.320096			1.68815	-0.553546	-0.677838	-1.19813	-0.53116	-3.43342	6.99588	-0.402206	0.33082	-2.21193	0.644896	1.65628	8.60637	3.04818	-3.15042	-0.371714	5.61284
2.038	4.80077	-0.690382	5.50437	-1.87473	-0.377916	-0.523894	0.688772	-1.41968	-2.82156	-3.62408	1.51581	-6.45539	-1.37551	-3.89403	0.023212	-3.42847	-0.258244			1.68321	-0.520506	-0.677082	-1.20268	-0.494648	-3.42856	7.00144	-0.427462	0.309512	-2.22865	0.647514	1.64919	8.64541	3.08392	-3.16271	-0.403018	5.54568
2.04	4.7732	-0.670278	5.50749	-1.87202	-0.39984	-0.496314	0.674506	-1.41427	-2.81625	-3.60685	1.52473	-6.45166	-1.39227	-3.90533	-0.002688	-3.44242	-0.252014			1.71717	-0.549612	-0.621684	-1.20995	-0.506926	-3.44144	7.01985	-0.426566	0.300468	-2.21308	0.649236	1.68259	8.664	3.10971	-3.1474	-0.350056	5.55122
2.042	4.77651	-0.661178	5.52006	-1.88777	-0.441042	-0.477316	0.646982	-1.42331	-2.83759	-3.62048	1.53374	-6.44175	-1.37626	-3.90821	0.006944	-3.41221	-0.270508			1.72131	-0.533092	-0.616616	-1.22766	-0.504896	-3.43434	7.04248	-0.433356	0.294252	-2.2386	0.643762	1.699	8.60381	3.12474	-3.15848	-0.432544	5.56989
2.044	4.78663	-0.667464	5.4917	-1.8948	-0.453642	-0.461566	0.641942	-1.42645	-2.83235	-3.6071	1.54238	-6.43215	-1.37431	-3.89719	0.007728	-3.33571	-0.583856			1.74499	-0.530558	-0.586992	-1.22434	-0.534436	-3.44852	7.0601	-0.430766	0.31017	-2.23121	0.635852	1.69614	8.6021	3.11977	-3.15757	-0.579488	5.48811
2.046	4.79671	-0.690312	5.45976	-1.89391	-0.432628	-0.483812	0.628096	-1.43227	-2.84598	-3.60797	1.5469	-6.44844	-1.37829	-3.8883	0.022092	-3.27958	-0.321062			1.75272	-0.505232	-0.571564	-1.21764	-0.532434	-3.46595	7.07038	-0.432082	0.316694	-2.22291	0.628628	1.68949	8.62705	3.09821	-3.19453	-0.633178	5.59062
2.048	4.81368	-0.718312	5.46652	-1.89668	-0.436464	-0.5257	0.597786	-1.42377	-2.85866	-3.62964	1.55494	-6.45498	-1.34956	-3.89186	-0.000882	-3.25121	-0.697102			1.74657	-0.526722	-0.573874	-1.20525	-0.498148	-3.49516	7.07381	-0.43638	0.313586	-2.21098	0.633724	1.65358	8.63765	3.08862	-3.14852	-0.62461	5.44907
2.05	4.80459	-0.713916	5.48353	-1.89308	-0.412552	-0.524286	0.58268	-1.42866	-2.8386	-3.63038	1.55228	-6.46716	-1.3893	-3.89495	0.00581	-3.24685	-0.453054			1.69645	-0.553084	-0.576856	-1.20141	-0.508186	-3.47778	7.08299	-0.424396	0.347578	-2.21326	0.62545	1.63904	8.66992	3.08706	-3.14199	-0.577976	5.56108
2.052	4.80609	-0.72037	5.50271	-1.88846	-0.404558	-0.515438	0.59024	-1.43599	-2.84536	-3.62712	1.55932	-6.48557	-1.43454	-3.90412	-0.001078	-3.25336	-0.511798			1.73662	-0.54348	-0.612262	-1.21164	-0.506534	-3.43364	7.09437	-0.426356	0.353654	-2.2266	0.625464	1.60355	8.70541	3.11426	-3.17524	-0.583282	5.52968
2.054	4.81354	-0.69734	5.53414	-1.87683	-0.407148	-0.506632	0.615342	-1.44376	-2.83297	-3.64312	1.55638	-6.49071	-1.45796	-3.90897	0.016688	-3.32802	-0.459466			1.74112	-0.561022	-0.629524	-1.21923	-0.509208	-3.43993	7.07127	-0.448308	0.345898	-2.25092	0.623602	1.59316	8.7019	3.12648	-3.14551	-0.54054	5.51831
2.056	4.8301	-0.694512	5.53286	-1.88546	-0.391734	-0.51912	0.571914	-1.44819	-2.85016	-3.62041	1.54871	-6.46846	-1.46985	-3.92078	0.03108	-3.29976	-0.3724			1.73652	-0.551054	-0.614208	-1.22266	-0.522648	-3.44457	7.04479	-0.421708	0.335664	-2.24246	0.622146	1.60154	8.70897	3.13678	-3.19028	-0.595308	5.51046
2.058	4.83687	-0.674156	5.53052	-1.89314	-0.433972	-0.534016	0.578858	-1.43058	-2.84449	-3.61651	1.54105	-6.4356	-1.46726	-3.92829	0.027482	-3.27887	-0.391328			1.7656	-0.55055	-0.598024	-1.24097	-0.506338	-3.46996	7.05911	-0.417634	0.324674	-2.25086	0.633234	1.59905	8.66785	3.16187	-3.21021	-0.62678	5.55691
2.06	4.80221	-0.673302	5.55562	-1.88705	-0.417186	-0.51275	0.555856	-1.43329	-2.84717	-3.63986	1.53117	-6.43961	-1.46138	-3.92505	0.000196	-3.19894	-0.69377			1.7997	-0.542976	-0.57799	-1.23957	-0.513422	-3.48902	7.08047	-0.430864	0.322546	-2.24438	0.635194	1.62289	8.66796	3.15769	-3.22368	-0.7392	5.44837
2.062	4.81309	-0.66801	5.54179	-1.90264	-0.439544	-0.512358	0.546014	-1.43485	-2.87841	-3.61466	1.53542	-6.43402	-1.45772	-3.90646	0.001764	-3.18835	-0.707812			1.78707	-0.549318	-0.551726	-1.24083	-0.504266	-3.4837	7.10571	-0.452298	0.31969	-2.24582	0.637476	1.64048	8.66606	3.14602	-3.19276	-0.736134	5.42175
2.064	4.84569	-0.685832	5.52184	-1.90172	-0.44541	-0.547358	0.538062	-1.43213	-2.88305	-3.6238	1.5358	-6.4631	-1.41761	-3.89886	-0.003262	-3.12777	-0.491442			1.81679	-0.525826	-0.533218	-1.23557	-0.51968	-3.45835	7.14022	-0.458234	0.34475	-2.24175	0.634774	1.58389	8.67958	3.13162	-3.18238	-0.816956	5.54233
2.066	4.85437	-0.712236	5.50621	-1.90009	-0.440314	-0.53774	0.53879	-1.46138	-2.87438	-3.65817	1.55266	-6.49081	-1.46398	-3.90898	-0.001876	-3.17272	-0.555576			1.78756	-0.553952	-0.52724	-1.22279	-0.502824	-3.45145	7.16142	-0.44205	0.325458	-2.23584	0.62412	1.5489	8.71438	3.1297	-3.14738	-0.741706	5.51529
2.068	4.87946	-0.727258	5.49879	-1.90253	-0.387842	-0.594748	0.566314	-1.44621	-2.87137	-3.6451	1.55949	-6.49078	-1.48306	-3.91779	0.01568	-3.14072	-0.589148			1.76821	-0.558488	-0.529382	-1.22538	-0.48692	-3.47073	7.16755	-0.429576	0.361718	-2.24729	0.619542	1.52865	8.72712	3.14975	-3.19227	-0.753592	5.52226
2.07	4.87507	-0.710388	5.48471	-1.88989	-0.401198	-0.596358	0.627662	-1.45141	-2.87259	-3.67905	1.56673	-6.50905	-1.55819	-3.92781	0.010402	-3.18032	-0.61887			1.72291	-0.53802	-0.51856	-1.22781	-0.491638	-3.47199	7.1419	-0.45031	0.353934	-2.25611	0.613956	1.54525	8.77142	3.17051	-3.1718	-0.703136	5.49401
2.072	4.90375	-0.71225	5.54169	-1.89791	-0.421834	-0.601706	0.651532	-1.45358	-2.86255	-3.66898	1.56765	-6.48656	-1.57217	-3.94243	0.016282	-3.17005	-0.566594			1.68694	-0.55783	-0.555058	-1.25068	-0.504686	-3.43489	7.12991	-0.430976	0.348502	-2.26699	0.610372	1.54601	8.76597	3.19299	-3.20442	-0.706314	5.46594
2.074	4.87407	-0.70812	5.57942	-1.89447	-0.41818	-0.597786	0.619822	-1.4485	-2.86264	-3.65072	1.57462	-6.4743	-1.52835	-3.93991	0.013132	-3.15556	-0.52619			1.74002	-0.572362	-0.581938	-1.25278	-0.521948	-3.43956	7.16015	-0.449176	0.33565	-2.30129	0.615706	1.57121	8.73321	3.2072	-3.18143	-0.74522	5.45229
2.076	4.87376	-0.698362	5.55383	-1.90603	-0.448756	-0.577304	0.568974	-1.46433	-2.8553	-3.63884	1.57567	-6.49414	-1.55849	-3.93943	0.017514	-3.05966	-0.50113			1.77743	-0.557102	-0.54593	-1.25632	-0.511406	-3.45775	7.15876	-0.450814	0.308812	-2.28917	0.61257	1.56624	8.70695	3.20354	-3.23365	-0.839706	5.47036
2.078	4.85211	-0.691446	5.56485	-1.91272	-0.449106	-0.56056	0.511546	-1.44838	-2.86447	-3.67898	1.5755	-6.48551	-1.55168	-3.92745	0.027818	-3.04154	-0.505736			1.8338	-0.567812	-0.53739	-1.25434	-0.493332	-3.50522	7.16499	-0.434714	0.306222	-2.28798	0.5978	1.58355	8.70111	3.19788	-3.2265	-0.841554	5.51814
2.08	4.8046	-0.66843	5.56315	-1.91206	-0.441112	-0.573216	0.47873	-1.44571	-2.8874	-3.66547	1.56808	-6.48186	-1.51949	-3.92335	0.003878	-2.99285	-0.839258			1.85753	-0.547302	-0.513646	-1.25343	-0.513086	-3.50042	7.15957	-0.448322	0.315028	-2.28154	0.616308	1.54309	8.71149	3.18944	-3.23478	-0.887012	5.37547
2.082	4.84653	-0.661892	5.57532	-1.90645	-0.43603	-0.593712	0.514892	-1.44882	-2.89572	-3.66464	1.5556	-6.51626	-1.52852	-3.93047	-0.0049	-2.96065	-0.589414			1.85478	-0.56252	-0.487214	-1.24366	-0.531846	-3.45743	7.16528	-0.456344	0.319872	-2.26684	0.621026	1.51452	8.74639	3.18122	-3.22391	-0.903252	5.48831
2.084	4.85773	-0.675668	5.53302	-1.90782	-0.405678	-0.62069	0.552524	-1.44159	-2.89554	-3.67651	1.55392	-6.5164	-1.58792	-3.9324	0.010976	-2.98736	-0.94276			1.80516	-0.52969	-0.457436	-1.25264	-0.525476	-3.42052	7.17135	-0.449666	0.348404	-2.26731	0.616476	1.47	8.76134	3.18352	-3.22123	-0.869932	5.32902
2.086	4.88006	-0.712124	5.52387	-1.90201	-0.412482	-0.635586	0.603554	-1.46037	-2.89015	-3.70076	1.55331	-6.50923	-1.61496	-3.94064	0.050512	-2.99939	-0.718438			1.78415	-0.582484	-0.482482	-1.25714	-0.516334	-3.45696	7.18676	-0.456176	0.368242	-2.28829	0.627592	1.44721	8.78625	3.20802	-3.23555	-0.849044	5.44394
2.088	4.92632	-0.697942	5.51219	-1.89972	-0.439544	-0.633528	0.677572	-1.45292	-2.88585	-3.67879	1.55474	-6.47856	-1.64741	-3.95287	0.025984	-2.99495	-0.79275			1.76718	-0.58212	-0.465682	-1.26564	-0.480732	-3.47173	7.182	-0.45528	0.350238	-2.29286	0.620872	1.46832	8.78591	3.23012	-3.19578	-0.848722	5.42836
2.09	4.93549	-0.718956	5.53911	-1.90417	-0.421834	-0.612724	0.650846	-1.46776	-2.87059	-3.69117	1.5624	-6.4765	-1.67079	-3.95812	0.012684	-3.01146	-0.806176			1.76238	-0.567448	-0.50855	-1.27228	-0.489692	-3.51464	7.18469	-0.460082	0.335328	-2.29897	0.61544	1.48182	8.77722	3.24797	-3.23075	-0.874552	5.43255
2.092	4.8797	-0.693532	5.57313	-1.90897	-0.430038	-0.603428	0.597436	-1.45978	-2.87414	-3.6786	1.57303	-6.47606	-1.62673	-3.95517	0.01743	-2.95179	-0.723408			1.81041	-0.55363	-0.521024	-1.27968	-0.517552	-3.52482	7.20444	-0.462308	0.33173	-2.29383	0.60403	1.49409	8.76415	3.25248	-3.23618	-0.893648	5.46874
2.094	4.87309	-0.695968	5.58176	-1.92213	-0.432376	-0.600208	0.53214	-1.45099	-2.88053	-3.67171	1.57462	-6.49858	-1.63248	-3.95098	0.015372	-2.88802	-0.725396			1.85879	-0.57526	-0.508424	-1.28607	-0.529228	-3.5211	7.20448	-0.473984	0.330946	-2.29183	0.60032	1.50854	8.7732	3.24954	-3.21992	-0.963116	5.43136
2.096	4.81775	-0.689878	5.57463	-1.9108	-0.441224	-0.621586	0.499058	-1.47109	-2.91099	-3.68159	1.59138	-6.49596	-1.62737	-3.94344	-0.02282	-2.82544	-0.937314			1.9012	-0.580048	-0.47166	-1.28773	-0.544404	-3.4987	7.21001	-0.473088	0.341978	-2.3297	0.598108	1.47743	8.7387	3.2306	-3.22679	-0.991354	5.29003
2.098	4.81327	-0.712572	5.56527	-1.90495	-0.431074	-0.649712	0.46837	-1.45859	-2.91346	-3.69349	1.59166	-6.51785	-1.63692	-3.94003	-0.021686	-2.74302	-0.70882			1.92776	-0.581322	-0.460124	-1.27372	-0.506492	-3.49366	7.20213	-0.462924	0.32655	-2.31843	0.594202	1.44374	8.72416	3.2264	-3.2311	-1.03151	5.50516
2.1	4.86385	-0.679238	5.56802	-1.90723	-0.43099	-0.638274	0.516964	-1.4673	-2.9112	-3.69716	1.58964	-6.50126	-1.66373	-3.93767	-0.017472	-2.74572	-1.01746			1.88497	-0.558362	-0.432866	-1.267	-0.514934	-3.4747	7.19576	-0.445438	0.332724	-2.29978	0.590996	1.41575	8.74839	3.22809	-3.22377	-1.0432	5.3065
2.102	4.87729	-0.679896	5.56755	-1.9088	-0.419916	-0.643916	0.574322	-1.47524	-2.90921	-3.69534	1.59116	-6.52967	-1.71536	-3.94888	0.022386	-2.80056	-0.781242			1.85643	-0.515242	-0.415772	-1.28374	-0.501942	-3.47081	7.20777	-0.43708	0.3297	-2.3172	0.583884	1.39504	8.76648	3.24765	-3.24771	-0.976612	5.47446
2.104	4.88659	-0.704522	5.54029	-1.91023	-0.426188	-0.625072	0.628768	-1.45356	-2.93241	-3.69746	1.58927	-6.51104	-1.74266	-3.96403	0.012404	-2.82803	-0.87955			1.79263	-0.54698	-0.398258	-1.29305	-0.544712	-3.4817	7.20838	-0.461496	0.391454	-2.30273	0.585942	1.41588	8.81458	3.28292	-3.21954	-0.991928	5.43704
2.106	4.91394	-0.719222	5.50836	-1.91782	-0.441854	-0.601426	0.66969	-1.46598	-2.91603	-3.689	1.57528	-6.50566	-1.76086	-3.96847	0.010696	-2.82575	-0.949186			1.78332	-0.572376	-0.395234	-1.29493	-0.538132	-3.51401	7.23026	-0.457086	0.366982	-2.31813	0.58989	1.4064	8.83561	3.28675	-3.22939	-0.9996	5.41611
2.108	4.9363	-0.715932	5.5174	-1.91717	-0.472486	-0.630728	0.639534	-1.47431	-2.90688	-3.69067	1.57364	-6.50546	-1.72938	-3.97708	0.038934	-2.80277	-0.918652			1.81506	-0.589484	-0.39935	-1.29891	-0.49672	-3.51782	7.24179	-0.45983	0.3437	-2.31028	0.590814	1.42281	8.81436	3.29217	-3.29122	-0.995918	5.39573
2.11	4.94633	-0.715372	5.54287	-1.91215	-0.458136	-0.641368	0.626052	-1.46679	-2.90182	-3.70034	1.56918	-6.50814	-1.71417	-3.97615	0.021882	-2.75687	-0.86009			1.84191	-0.581532	-0.38934	-1.30616	-0.499352	-3.54339	7.27292	-0.46746	0.329644	-2.3435	0.593642	1.44767	8.79997	3.28881	-3.25913	-1.00696	5.38286
2.112	4.93272	-0.72016	5.57057	-1.90438	-0.435792	-0.648116	0.56882	-1.46762	-2.90511	-3.68652	1.56267	-6.51886	-1.7057	-3.96596	-0.007434	-2.67205	-0.782474			1.82851	-0.579138	-0.426916	-1.29699	-0.516726	-3.5195	7.27209	-0.476826	0.32039	-2.33359	0.59997	1.41484	8.78329	3.29538	-3.2921	-1.06128	5.31864
2.114	4.92982	-0.702926	5.58664	-1.90956	-0.437136	-0.650776	0.545482	-1.47106	-2.92964	-3.69114	1.56584	-6.53451	-1.70359	-3.96026	-0.013006	-2.62025	-0.837662			1.88461	-0.581252	-0.423584	-1.29412	-0.540708	-3.50766	7.26603	-0.458094	0.328104	-2.34829	0.604912	1.36847	8.79914	3.28031	-3.25132	-1.13477	5.365
2.116	4.91166	-0.733838	5.59597	-1.91421	-0.447076	-0.664622	0.535164	-1.4589	-2.9518	-3.69166	1.57136	-6.56554	-1.69674	-3.9593	-0.001358	-2.57928	-0.867776			1.90714	-0.603022	-0.405132	-1.29567	-0.518812	-3.48214	7.28001	-0.48013	0.349874	-2.36104	0.595056	1.34806	8.82812	3.2732	-3.25805	-1.12777	5.43218
2.118	4.90739	-0.704844	5.59171	-1.92879	-0.430528	-0.656992	0.54418	-1.47522	-2.92809	-3.68963	1.58502	-6.55103	-1.7145	-3.97159	-0.005614	-2.57802	-0.875504			1.90079	-0.582246	-0.392938	-1.29518	-0.5201	-3.46494	7.24725	-0.465948	0.345982	-2.34833	0.592172	1.32227	8.84262	3.28649	-3.24965	-1.13025	5.40078
2.12	4.90104	-0.713818	5.60479	-1.92511	-0.425152	-0.662816	0.584528	-1.46836	-2.93889	-3.71315	1.59338	-6.543	-1.75665	-3.97477	-0.003738	-2.61828	-0.945336			1.88777	-0.565936	-0.365036	-1.29655	-0.508298	-3.47425	7.23708	-0.466186	0.327194	-2.34542	0.582806	1.3439	8.87081	3.30445	-3.27151	-1.08913	5.39879
2.122	4.91642	-0.692566	5.59306	-1.92009	-0.444486	-0.662018	0.603708	-1.4714	-2.92554	-3.72247	1.60111	-6.57091	-1.79579	-3.97944	0.015946	-2.64635	-0.99946			1.85044	-0.535864	-0.347438	-1.30404	-0.52486	-3.50848	7.25302	-0.457268	0.351736	-2.35507	0.573062	1.35936	8.92053	3.32668	-3.25235	-1.08784	5.36424
2.124	4.9177	-0.712936	5.59216	-1.9076	-0.472122	-0.643944	0.611716	-1.46362	-2.94167	-3.71736	1.59929	-6.52488	-1.7976	-3.98679	0.015372	-2.64204	-1.04294			1.84387	-0.569128	-0.34559	-1.30827	-0.533162	-3.51949	7.28158	-0.462756	0.343126	-2.33733	0.573888	1.38153	8.90362	3.34324	-3.27369	-1.09367	5.33547
2.126	4.90557	-0.715848	5.53315	-1.90618	-0.482888	-0.653562	0.59332	-1.47204	-2.92597	-3.71594	1.60299	-6.53521	-1.78755	-3.98502	0.03563	-2.63273	-1.06926			1.89064	-0.575876	-0.33495	-1.31537	-0.533666	-3.5076	7.30087	-0.48125	0.356174	-2.36411	0.570654	1.38214	8.87688	3.34067	-3.28863	-1.11122	5.33597
2.128	4.92803	-0.729694	5.53669	-1.90852	-0.472766	-0.676452	0.58919	-1.45736	-2.92201	-3.7343	1.59919	-6.55985	-1.78168	-3.98241	-0.009758	-2.56857	-0.999782			1.92763	-0.583254	-0.314496	-1.31964	-0.527478	-3.49832	7.318	-0.46998	0.372428	-2.36131	0.563192	1.35762	8.83154	3.32854	-3.30089	-1.12529	5.34955
2.13	4.93906	-0.73423	5.53848	-1.91601	-0.44303	-0.717458	0.588028	-1.49741	-2.9399	-3.71449	1.58054	-6.57901	-1.78882	-3.97359	0.00217	-2.48277	-0.954898			1.93084	-0.578424	-0.320712	-1.32923	-0.50309	-3.53832	7.32417	-0.46242	0.351218	-2.35585	0.564858	1.31358	8.83247	3.31894	-3.26619	-1.18447	5.32812
2.132	4.91907	-0.749378	5.57677	-1.92087	-0.42658	-0.73339	0.561022	-1.49561	-2.93982	-3.70867	1.59344	-6.56657	-1.76873	-3.96771	-0.027552	-2.4149	-0.955542			1.92476	-0.56973	-0.319564	-1.33041	-0.492646	-3.5098	7.3268	-0.458038	0.322826	-2.36954	0.564466	1.27894	8.85063	3.31367	-3.2689	-1.20455	5.36766
2.134	4.87637	-0.741594	5.61469	-1.9227	-0.434854	-0.726712	0.521038	-1.488	-2.95305	-3.70511	1.57284	-6.59838	-1.79294	-3.96764	-0.002072	-2.38601	-0.955724			1.93488	-0.56476	-0.35308	-1.32437	-0.516474	-3.5051	7.32413	-0.477792	0.337498	-2.37796	0.569366	1.25238	8.88761	3.31972	-3.31254	-1.2243	5.39672
2.136	4.89734	-0.758044	5.62299	-1.9335	-0.424956	-0.732942	0.506254	-1.49033	-2.96643	-3.72257	1.587	-6.53204	-1.81691	-3.98143	0.031458	-2.37247	-0.994938			1.97922	-0.556654	-0.367038	-1.32199	-0.50904	-3.4918	7.32596	-0.479542	0.333984	-2.38734	0.58779	1.2525	8.90476	3.33269	-3.28133	-1.21285	5.35734
2.138	4.88355	-0.725984	5.64061	-1.93073	-0.46123	-0.73143	0.529858	-1.50261	-2.95821	-3.72753	1.58875	-6.54483	-1.85598	-3.99601	0.05173	-2.37654	-1.02757			2.0036	-0.57421	-0.32865	-1.31467	-0.517944	-3.51042	7.30003	-0.486766	0.348194	-2.38259	0.59563	1.281	8.91603	3.35941	-3.29046	-1.17904	5.36516
2.14	4.89616	-0.74298	5.64515	-1.92654	-0.470162	-0.725648	0.585312	-1.47473	-2.97892	-3.75806	1.59208	-6.53374	-1.89622	-4.00779	-0.00224	-2.38242	-1.09759			1.97781	-0.534786	-0.304444	-1.31786	-0.499604	-3.51879	7.32879	-0.475398	0.361886	-2.37555	0.584052	1.28285	8.91995	3.38555	-3.29136	-1.16427	5.34152
2.142	4.9289	-0.758086	5.65204	-1.91885	-0.464828	-0.706524	0.610442	-1.48457	-2.96267	-3.74499	1.59299	-6.55834	-1.90905	-4.00644	0.024948	-2.4065	-1.15203			1.95114	-0.568274	-0.304304	-1.3298	-0.515816	-3.53842	7.30097	-0.475188	0.351036	-2.35703	0.561568	1.31394	8.91423	3.39562	-3.29354	-1.20915	5.30642
2.144	4.92108	-0.763686	5.61425	-1.93462	-0.470554	-0.719922	0.587692	-1.48613	-2.95011	-3.74836	1.60105	-6.55889	-1.86154	-3.99659	0.026418	-2.39924	-1.16707			1.93815	-0.574042	-0.2877	-1.33602	-0.489006	-3.52603	7.34206	-0.47236	0.345534	-2.40255	0.563486	1.28822	8.88451	3.40218	-3.32335	-1.22123	5.28574
2.146	4.91228	-0.783776	5.58993	-1.93332	-0.465822	-0.733362	0.577808	-1.48169	-2.94881	-3.74486	1.61066	-6.56422	-1.89041	-3.99242	0.006314	-2.31307	-1.08871			1.95923	-0.57043	-0.278992	-1.34672	-0.527464	-3.49059	7.35472	-0.47992	0.338324	-2.41076	0.554442	1.24307	8.85696	3.38846	-3.31776	-1.23626	5.3061
2.148	4.93541	-0.745794	5.58904	-1.93686	-0.44191	-0.756	0.589834	-1.48403	-2.96624	-3.74874	1.61724	-6.58456	-1.89378	-3.98111	-0.026656	-2.23877	-1.07762			1.99798	-0.601874	-0.254464	-1.34877	-0.476224	-3.48846	7.38321	-0.489328	0.322434	-2.41395	0.558754	1.19441	8.87683	3.37175	-3.31223	-1.28554	5.32357
2.15	4.95792	-0.7532	5.5775	-1.93584	-0.437598	-0.765492	0.56931	-1.47169	-2.96743	-3.74497	1.62263	-6.60454	-1.86896	-3.99101	-0.029582	-2.16803	-1.07307			1.99895	-0.591738	-0.283878	-1.34476	-0.49112	-3.50959	7.39183	-0.479318	0.331422	-2.41639	0.555394	1.17527	8.89505	3.36064	-3.31135	-1.29069	5.31791
2.152	4.95652	-0.743274	5.59581	-1.93432	-0.430234	-0.779422	0.522032	-1.49524	-2.98117	-3.73363	1.61543	-6.55977	-1.92125	-3.98902	-0.000588	-2.10773	-1.0849			1.9809	-0.586544	-0.287294	-1.36058	-0.524188	-3.49972	7.38896	-0.485156	0.344344	-2.40996	0.552902	1.20918	8.92473	3.36839	-3.28608	-1.272	5.34202
2.154	4.91331	-0.722568	5.6274	-1.93739	-0.433608	-0.775208	0.498204	-1.49299	-2.97009	-3.74147	1.61112	-6.56096	-1.95094	-3.9983	0.018298	-2.15162	-1.08419			2.00553	-0.556752	-0.30751	-1.33792	-0.513744	-3.48928	7.39337	-0.494634	0.331282	-2.42312	0.553854	1.21222	8.94992	3.41246	-3.3048	-1.21792	5.30386
2.156	4.88158	-0.753998	5.63205	-1.94554	-0.438564	-0.770322	0.48076	-1.49262	-2.96468	-3.73443	1.60483	-6.54471	-1.98612	-4.01423	0.012572	-2.15666	-1.12958			2.02339	-0.565292	-0.290416	-1.34288	-0.548758	-3.51345	7.39389	-0.482146	0.360094	-2.40456	0.563402	1.22427	8.95758	3.42322	-3.29336	-1.22639	5.30544
2.158	4.87967	-0.739144	5.64837	-1.93418	-0.422212	-0.725466	0.523194	-1.50573	-2.98228	-3.75927	1.60287	-6.57021	-2.00816	-4.02479	-0.000924	-2.18511	-1.19668			2.03542	-0.565082	-0.262612	-1.3463	-0.532672	-3.53142	7.39441	-0.49511	0.378182	-2.40647	0.564088	1.22639	8.9574	3.43904	-3.32226	-1.26161	5.26558
2.16	4.90042	-0.758758	5.65986	-1.93668	-0.44716	-0.707546	0.532882	-1.51515	-2.9612	-3.7745	1.59739	-6.57237	-2.01174	-4.01901	0.011998	-2.17206	-1.27037			2.0573	-0.580678	-0.262724	-1.34977	-0.525112	-3.59071	7.38795	-0.488502	0.3598	-2.40094	0.57316	1.22696	8.93066	3.44175	-3.32228	-1.25264	5.21902
2.162	4.92731	-0.768516	5.66219	-1.9453	-0.443744	-0.754194	0.582974	-1.49768	-2.96524	-3.75056	1.59978	-6.58655	-1.98215	-4.01271	-0.00154	-2.11316	-1.29541			2.01804	-0.593684	-0.264278	-1.35408	-0.530726	-3.57745	7.38035	-0.483042	0.353514	-2.40327	0.57008	1.18621	8.88782	3.44175	-3.35962	-1.26466	5.19005
2.164	4.91645	-0.756854	5.67069	-1.95357	-0.448532	-0.785302	0.56483	-1.49461	-2.96468	-3.76982	1.60139	-6.59067	-1.97225	-4.00337	-0.037156	-2.04022	-1.32371			2.002	-0.560266	-0.236628	-1.3643	-0.526302	-3.55179	7.39995	-0.488376	0.34566	-2.43314	0.555744	1.15185	8.90043	3.43064	-3.32611	-1.28135	5.19483
2.166	4.92072	-0.751982	5.62444	-1.95481	-0.442554	-0.808514	0.531482	-1.49309	-2.96507	-3.76394	1.60833	-6.60591	-1.9563	-3.99942	-0.030086	-1.95651	-1.22451			2.0246	-0.592102	-0.198198	-1.37266	-0.54691	-3.50342	7.42207	-0.485002	0.333606	-2.42915	0.553644	1.15181	8.9256	3.42756	-3.3137	-1.28506	5.24972
2.168	4.94644	-0.758604	5.6308	-1.95126	-0.440062	-0.792582	0.551446	-1.49647	-2.9706	-3.74013	1.61125	-6.6081	-1.98157	-4.00534	0.01414	-1.89616	-1.21204			2.03518	-0.588686	-0.198562	-1.36793	-0.541548	-3.53044	7.4391	-0.465892	0.337498	-2.42294	0.549192	1.16893	8.96337	3.40977	-3.32506	-1.30029	5.27145
2.17	4.94043	-0.760172	5.61551	-1.93466	-0.445186	-0.799316	0.550718	-1.49915	-2.99132	-3.74405	1.62246	-6.60919	-2.03617	-4.00103	-0.016926	-1.86945	-1.21741			2.03132	-0.589848	-0.209706	-1.37127	-0.513548	-3.55405	7.47505	-0.493052	0.357042	-2.43002	0.54439	1.16617	8.96405	3.4168	-3.37746	-1.29549	5.23162
2.172	4.94486	-0.758646	5.63609	-1.9424	-0.451164	-0.789474	0.536032	-1.48756	-3.00842	-3.75659	1.62617	-6.57236	-2.08405	-4.01339	0.000602	-1.89556	-1.20488			2.04376	-0.580132	-0.231364	-1.36773	-0.51156	-3.61509	7.49158	-0.498372	0.34384	-2.45713	0.542122	1.17485	8.97554	3.44837	-3.35962	-1.2686	5.20967
2.174	4.93003	-0.743456	5.67965	-1.94905	-0.451668	-0.769202	0.4949	-1.51	-2.98892	-3.74923	1.62798	-6.57458	-2.09367	-4.0201	0.00392	-1.90063	-1.24838			2.06647	-0.581784	-0.2604	-1.3572	-0.544558	-3.58464	7.46256	-0.49497	0.36323	-2.45057	0.53886	1.18528	8.96774	3.47467	-3.35069	-1.28397	5.21139
2.176	4.89096	-0.749084	5.70192	-1.96882	-0.448756	-0.782068	0.472738	-1.50289	-2.99582	-3.74774	1.62504	-6.6058	-2.14054	-4.03081	-0.008708	-1.92982	-1.29048			2.08053	-0.55825	-0.22582	-1.36234	-0.526204	-3.58354	7.48047	-0.507108	0.374052	-2.43641	0.54432	1.18182	8.95019	3.49005	-3.38689	-1.29045	5.19085
2.178	4.91029	-0.769048	5.69804	-1.95637	-0.434238	-0.784812	0.473676	-1.52291	-2.99534	-3.78524	1.62487	-6.60603	-2.13473	-4.02205	-0.016632	-1.91293	-1.37197			2.09969	-0.56658	-0.204092	-1.35701	-0.551894	-3.57444	7.44145	-0.518882	0.36925	-2.43708	0.544712	1.14885	8.94324	3.47967	-3.36913	-1.31156	5.15564
2.18	4.92488	-0.790888	5.70874	-1.95924	-0.438704	-0.814576	0.510986	-1.51614	-2.97571	-3.77628	1.61629	-6.61198	-2.12472	-4.01247	-0.034496	-1.86911	-1.41337			2.06835	-0.593656	-0.195552	-1.37066	-0.514374	-3.58169	7.46745	-0.499688	0.349916	-2.44238	0.54138	1.1058	8.98279	3.46651	-3.34309	-1.2993	5.13029
2.182	4.95005	-0.75698	5.71252	-1.95082	-0.435106	-0.818496	0.55202	-1.49492	-2.98626	-3.79849	1.61029	-6.6116	-2.0855	-4.01439	-0.012586	-1.77271	-1.4546			2.04778	-0.59864	-0.203	-1.37483	-0.51436	-3.54719	7.4846	-0.500066	0.345352	-2.46413	0.54761	1.0771	8.95486	3.4578	-3.34351	-1.31356	5.13638
2.184	4.94563	-0.764274	5.70086	-1.94495	-0.453838	-0.80297	0.551726	-1.51171	-2.98033	-3.79883	1.60691	-6.61826	-2.14934	-4.01008	-0.014	-1.68507	-1.40921			2.04725	-0.585872	-0.164654	-1.38828	-0.519946	-3.53539	7.47624	-0.503328	0.331828	-2.47184	0.559692	1.05581	8.94881	3.45418	-3.34428	-1.34025	5.14144
2.186	4.93581	-0.754068	5.66412	-1.94048	-0.480018	-0.824978	0.548184	-1.50242	-3.00061	-3.77916	1.60262	-6.59946	-2.17958	-4.01853	-0.001526	-1.60815	-1.37924			2.06513	-0.598234	-0.137578	-1.38278	-0.54173	-3.54434	7.50404	-0.492716	0.349006	-2.47164	0.55818	1.07701	8.91388	3.47263	-3.39023	-1.30707	5.1941
2.188	4.94302	-0.756266	5.69729	-1.93754	-0.4802	-0.796502	0.53081	-1.49715	-3.00986	-3.77807	1.61477	-6.6192	-2.24305	-4.02521	-0.002562	-1.61342	-1.36076			2.0651	-0.600432	-0.148596	-1.38666	-0.557634	-3.53968	7.52882	-0.51324	0.354816	-2.47278	0.56301	1.09582	8.90144	3.49279	-3.39436	-1.30183	5.18988
2.19	4.9517	-0.777308	5.66908	-1.95076	-0.492814	-0.809844	0.55027	-1.50182	-3.00068	-3.77366	1.60943	-6.58515	-2.2085	-4.04237	-0.001652	-1.67156	-1.38144			2.08625	-0.61222	-0.16233	-1.39097	-0.53991	-3.57202	7.54776	-0.523166	0.352982	-2.47537	0.548086	1.07558	8.89329	3.51225	-3.40623	-1.27631	5.16828
2.192	4.95904	-0.769412	5.71487	-1.9586	-0.475972	-0.831698	0.532056	-1.52617	-3.00385	-3.75606	1.61095	-6.62886	-2.2309	-4.04838	-0.042574	-1.66888	-1.37894			2.08205	-0.607096	-0.197988	-1.3826	-0.51576	-3.57906	7.53551	-0.51842	0.361452	-2.45699	0.526484	1.08387	8.89398	3.53175	-3.40953	-1.26802	5.13884
2.194	4.95029	-0.714686	5.73616	-1.96396	-0.444724	-0.848666	0.488054	-1.49699	-3.01083	-3.78337	1.6214	-6.61842	-2.2213	-4.04762	-0.03423	-1.69673	-1.42877			2.08323	-0.565922	-0.208222	-1.36879	-0.527506	-3.54465	7.52413	-0.509586	0.34881	-2.47733	0.522312	1.08308	8.92016	3.5338	-3.3959	-1.30508	5.13905
2.196	4.92708	-0.738318	5.75299	-1.97193	-0.434532	-0.851102	0.458682	-1.51529	-2.99523	-3.80316	1.63258	-6.64804	-2.20868	-4.0383	-0.021462	-1.62298	-1.49906			2.12957	-0.560784	-0.179648	-1.37382	-0.522522	-3.56195	7.55947	-0.492366	0.351316	-2.46184	0.507052	1.04958	8.92711	3.5226	-3.34851	-1.31655	5.08554
2.198	4.94467	-0.753648	5.78367	-1.94454	-0.422436	-0.858144	0.467656	-1.52408	-3.00516	-3.8148	1.62401	-6.64997	-2.23979	-4.0326	-0.014112	-1.59099	-1.55197			2.12216	-0.589652	-0.157066	-1.38071	-0.539182	-3.56303	7.54475	-0.533162	0.35441	-2.47453	0.509026	1.02596	8.90567	3.49514	-3.39388	-1.31323	5.0482
2.2	4.96614	-0.776174	5.76617	-1.93129	-0.440482	-0.87318	0.499296	-1.52323	-3.01003	-3.81668	1.62919	-6.64688	-2.28241	-4.02597	-0.00427	-1.51176	-1.58262			2.08223	-0.58954	-0.149842	-1.38599	-0.538062	-3.53998	7.54306	-0.513184	0.346752	-2.48529	0.520744	0.971194	8.87856	3.49084	-3.37931	-1.28814	5.01557
2.202	5.00878	-0.776664	5.75023	-1.94215	-0.48552	-0.862904	0.48349	-1.51168	-3.0161	-3.81864	1.62494	-6.59547	-2.26736	-4.02406	-0.011844	-1.41168	-1.48708			2.08732	-0.594286	-0.142842	-1.39341	-0.538972	-3.51238	7.53771	-0.495894	0.347284	-2.48332	0.513296	0.970452	8.84153	3.51954	-3.41067	-1.28356	5.03062
2.204	4.99621	-0.786394	5.72363	-1.95231	-0.470078	-0.873852	0.489622	-1.51073	-3.00355	-3.8297	1.62714	-6.59879	-2.29397	-4.03486	-0.010612	-1.37893	-1.49034			2.09268	-0.597744	-0.097916	-1.40367	-0.538888	-3.53304	7.52639	-0.51366	0.35231	-2.49171	0.509992	0.99043	8.8419	3.54476	-3.39185	-1.27361	5.03987
2.206	4.98466	-0.77049	5.74752	-1.96021	-0.474432	-0.878024	0.477694	-1.51194	-3.01766	-3.79546	1.62596	-6.56578	-2.24102	-4.04142	-0.033208	-1.39383	-1.49919			2.10543	-0.59339	-0.096754	-1.41182	-0.53473	-3.52717	7.54851	-0.502124	0.370342	-2.48406	0.513968	1.03825	8.8661	3.55299	-3.3881	-1.26846	5.09848
2.208	5.01322	-0.798098	5.72897	-1.95994	-0.461902	-0.844662	0.48188	-1.51271	-3.0095	-3.81749	1.61157	-6.62714	-2.23201	-4.05173	-0.019152	-1.4306	-1.51032			2.09637	-0.606606	-0.102872	-1.39916	-0.560056	-3.58758	7.58122	-0.512344	0.346332	-2.52239	0.5271	1.0303	8.91505	3.57176	-3.39573	-1.25608	5.0751
2.21	5.01977	-0.773822	5.73516	-1.96651	-0.469196	-0.84714	0.49609	-1.5343	-3.0184	-3.78535	1.61136	-6.6535	-2.25632	-4.05265	-0.024024	-1.41561	-1.48868			2.1357	-0.566902	-0.13755	-1.38789	-0.528178	-3.56259	7.609	-0.526232	0.397964	-2.51028	0.53193	1.01882	8.92198	3.56976	-3.38191	-1.27275	5.0766
2.212	5.01511	-0.745472	5.77451	-1.97596	-0.451934	-0.882588	0.501312	-1.53657	-3.04482	-3.78535	1.61437	-6.64968	-2.28131	-4.04929	-0.038738	-1.42304	-1.5409			2.12537	-0.580132	-0.14504	-1.38902	-0.49532	-3.56091	7.63508	-0.515466	0.39221	-2.49448	0.536102	0.98483	8.93719	3.58323	-3.39751	-1.28535	5.0336
2.214	4.9524	-0.700854	5.76065	-1.95325	-0.448672	-0.908404	0.492338	-1.5391	-3.01883	-3.82952	1.61549	-6.65525	-2.33587	-4.02996	-0.021868	-1.38335	-1.62315			2.14798	-0.54264	-0.135506	-1.38558	-0.521066	-3.57006	7.60551	-0.531188	0.37576	-2.49367	0.526694	0.94122	8.91958	3.56289	-3.44961	-1.26349	4.99314
2.216	5.00205	-0.72233	5.77844	-1.94818	-0.459564	-0.89495	0.494158	-1.53362	-3.0338	-3.83636	1.61952	-6.62095	-2.3204	-4.02252	-0.01372	-1.29791	-1.67828			2.1723	-0.548268	-0.10486	-1.40552	-0.529802	-3.55345	7.60116	-0.508424	0.368046	-2.50495	0.521388	0.954814	8.91142	3.55418	-3.44319	-1.27347	4.96357
2.218	4.99307	-0.76685	5.79485	-1.9607	-0.483028	-0.901194	0.47033	-1.52365	-3.02807	-3.82693	1.62421	-6.61368	-2.29993	-4.03808	-0.039718	-1.21607	-1.71952			2.14638	-0.580916	-0.073304	-1.4219	-0.55321	-3.55741	7.63948	-0.521766	0.343196	-2.50774	0.5117	0.926324	8.8592	3.54816	-3.41594	-1.25961	4.94087
2.22	5.0247	-0.768544	5.80465	-1.95668	-0.46802	-0.886158	0.492562	-1.55047	-3.02975	-3.84341	1.63601	-6.63622	-2.33766	-4.04002	-0.006818	-1.12225	-1.68655			2.14392	-0.628642	-0.064932	-1.42036	-0.548436	-3.50916	7.60677	-0.535556	0.350112	-2.51819	0.503874	0.927934	8.85191	3.56514	-3.47288	-1.19995	4.96433
2.222	5.02418	-0.778568	5.7839	-1.96403	-0.480396	-0.922852	0.515662	-1.53215	-3.05347	-3.81499	1.6385	-6.60388	-2.31861	-4.05376	-0.0203	-1.09537	-1.64549			2.13843	-0.640514	-0.056686	-1.42572	-0.539098	-3.53863	7.61256	-0.537376	0.37681	-2.54157	0.49749	0.949368	8.88901	3.60333	-3.44466	-1.21006	4.97734
2.224	5.02424	-0.765114	5.73416	-1.97107	-0.478226	-0.902188	0.542164	-1.52558	-3.03265	-3.80936	1.64335	-6.61361	-2.29873	-4.05597	-0.042616	-1.13987	-1.568			2.1492	-0.597688	-0.041664	-1.42121	-0.511154	-3.59149	7.59415	-0.524916	0.357896	-2.53988	0.48531	0.972622	8.88833	3.61714	-3.44968	-1.18096	4.91166
2.226	5.02828	-0.766416	5.75037	-1.97417	-0.472374	-0.896602	0.563234	-1.52596	-3.06123	-3.80597	1.63594	-6.62952	-2.36669	-4.06029	-0.043666	-1.16001	-1.55281			2.1443	-0.58401	-0.027342	-1.42465	-0.539826	-3.6113	7.6021	-0.50827	0.392714	-2.52979	0.49147	0.966518	8.89792	3.63259	-3.43091	-1.18199	4.96299
2.228	5.0052	-0.739956	5.73223	-1.97715	-0.458738	-0.88753	0.553126	-1.52734	-3.04339	-3.80079	1.63311	-6.6319	-2.3949	-4.0573	-0.046186	-1.16834	-1.62569			2.13962	-0.57841	-0.048314	-1.4187	-0.538958	-3.58393	7.63689	-0.513702	0.393386	-2.51625	0.491806	0.930188	8.89231	3.6394	-3.42716	-1.21268	4.99187
2.23	5.02702	-0.735308	5.76083	-1.97058	-0.472066	-0.922544	0.507892	-1.54591	-3.04494	-3.82197	1.63138	-6.62084	-2.41696	-4.04761	-0.009268	-1.1425	-1.64214			2.18638	-0.564088	-0.075348	-1.42122	-0.535724	-3.53983	7.66835	-0.529452	0.38787	-2.52133	0.4977	0.885192	8.9284	3.61312	-3.42335	-1.22104	4.96969
2.232	5.01994	-0.717346	5.77175	-1.95644	-0.473424	-0.969262	0.524398	-1.53975	-3.03867	-3.84626	1.62817	-6.6586	-2.42596	-4.04991	-0.016366	-1.11581	-1.71681			2.16787	-0.547302	-0.09317	-1.42015	-0.533932	-3.52925	7.69182	-0.522704	0.383054	-2.538	0.510146	0.857346	8.91327	3.60028	-3.42615	-1.20303	4.94522
2.234	5.00639	-0.703682	5.77737	-1.96531	-0.466158	-0.94542	0.52801	-1.54342	-3.02305	-3.83981	1.6144	-6.62263	-2.39541	-4.05215	-0.022904	-1.0481	-1.7501			2.19943	-0.510706	-0.094192	-1.42526	-0.536564	-3.56065	7.68732	-0.523698	0.366898	-2.54706	0.519358	0.874146	8.8829	3.60094	-3.45125	-1.17349	4.88536
2.236	5.01532	-0.739242	5.79209	-1.96469	-0.48923	-0.922782	0.496692	-1.53691	-3.05019	-3.85854	1.61435	-6.62914	-2.41485	-4.04873	-0.029526	-0.934598	-1.76498			2.18779	-0.53172	-0.038948	-1.43058	-0.547624	-3.59416	7.68918	-0.519596	0.37296	-2.55235	0.514136	0.885682	8.88714	3.61613	-3.46445	-1.12939	4.8491
2.238	4.99663	-0.760718	5.80601	-1.96647	-0.477218	-0.895426	0.47474	-1.53518	-3.06166	-3.85204	1.62137	-6.59456	-2.39061	-4.05258	-0.017024	-0.8743	-1.77775			2.20654	-0.558138	-0.011508	-1.4435	-0.55993	-3.61193	7.69891	-0.546154	0.369726	-2.54619	0.505302	0.91791	8.87694	3.63875	-3.47899	-1.07878	4.86479
2.24	5.02583	-0.720664	5.80121	-1.97462	-0.468384	-0.91126	0.466172	-1.55701	-3.06251	-3.80603	1.63605	-6.62647	-2.40386	-4.0658	-0.018928	-0.863352	-1.72876			2.1902	-0.57001	-0.007686	-1.44267	-0.554624	-3.60762	7.71427	-0.567182	0.363034	-2.55144	0.501326	0.921942	8.89567	3.65278	-3.49593	-1.05402	4.8385
2.242	5.03038	-0.738878	5.78593	-1.97884	-0.47467	-0.936488	0.470428	-1.54221	-3.0609	-3.80663	1.63754	-6.63873	-2.46054	-4.08149	-0.014308	-0.91595	-1.69498			2.18718	-0.607502	0.018718	-1.43774	-0.53165	-3.60847	7.71943	-0.547386	0.387254	-2.55388	0.495194	0.900382	8.91437	3.65966	-3.50003	-1.05934	4.83458
2.244	5.05474	-0.722512	5.74594	-1.97001	-0.457912	-0.951342	0.50379	-1.54477	-3.06823	-3.85647	1.64388	-6.66863	-2.48996	-4.07211	-0.054964	-0.900592	-1.68666			2.18092	-0.582932	0.029652	-1.42877	-0.524356	-3.60591	7.69486	-0.53676	0.390404	-2.56988	0.488026	0.897582	8.94638	3.67696	-3.45827	-1.05115	4.88361
2.246	5.05032	-0.727454	5.76356	-1.97067	-0.451724	-0.94521	0.543144	-1.54084	-3.09506	-3.82458	1.64434	-6.63935	-2.49533	-4.07287	-0.027818	-0.947548	-1.71413			2.21168	-0.577346	0.020916	-1.42808	-0.549444	-3.57354	7.68594	-0.52892	0.416976	-2.56291	0.474306	0.843486	8.94603	3.67664	-3.48881	-1.07743	4.95183
2.248	5.05445	-0.702772	5.74937	-1.97441	-0.461132	-0.978936	0.557998	-1.55215	-3.06457	-3.84377	1.6494	-6.64195	-2.50131	-4.05824	-0.02793	-0.95242	-1.75647			2.2449	-0.581728	0.027804	-1.43686	-0.551782	-3.57966	7.70413	-0.529018	0.405216	-2.56663	0.482762	0.807856	8.94146	3.65837	-3.49776	-1.07716	4.93266
2.25	5.07636	-0.7231	5.7723	-1.96636	-0.47187	-0.966938	0.542878	-1.52802	-3.04686	-3.87106	1.6448	-6.63293	-2.51647	-4.05614	-0.025228	-0.882434	-1.82416			2.22208	-0.586754	-0.003038	-1.44182	-0.536494	-3.5813	7.73552	-0.54446	0.37555	-2.57888	0.47551	0.787822	8.93567	3.64407	-3.45699	-1.05909	4.87885
2.252	5.05287	-0.710892	5.80301	-1.96252	-0.491008	-0.950502	0.55328	-1.53824	-3.07548	-3.8537	1.64298	-6.63698	-2.48892	-4.04421	-0.022806	-0.84091	-1.88644			2.24574	-0.549682	-0.023926	-1.44943	-0.533344	-3.5637	7.7555	-0.54775	0.371532	-2.57083	0.476896	0.806736	8.89595	3.65441	-3.47771	-1.03601	4.83085
2.254	4.99986	-0.747264	5.80507	-1.97211	-0.478114	-0.945826	0.529718	-1.55954	-3.10094	-3.86816	1.63925	-6.62424	-2.47051	-4.05881	-0.044576	-0.724234	-1.85996			2.28649	-0.542024	0.002926	-1.45642	-0.52815	-3.58663	7.77028	-0.529368	0.369698	-2.57867	0.482846	0.82544	8.90271	3.66902	-3.48492	-0.971992	4.79639
2.256	4.99012	-0.75453	5.81013	-1.97337	-0.453824	-0.969752	0.480788	-1.55278	-3.07147	-3.87054	1.63989	-6.6271	-2.47124	-4.06462	-0.041132	-0.654024	-1.89386			2.27738	-0.568652	-0.004172	-1.47461	-0.533778	-3.53072	7.78649	-0.532252	0.379736	-2.58251	0.486668	0.837718	8.94015	3.68862	-3.52205	-0.923244	4.82156
2.258	5.00829	-0.735126	5.81221	-1.97359	-0.437822	-0.967946	0.465318	-1.5171	-3.09725	-3.86513	1.63148	-6.62313	-2.50456	-4.07235	-0.038178	-0.662564	-1.86063			2.26695	-0.574042	0.049686	-1.46485	-0.564956	-3.52418	7.77871	-0.52913	0.388206	-2.60001	0.49098	0.854994	8.96169	3.71021	-3.53503	-0.930104	4.75712
2.26	5.0423	-0.725144	5.84711	-1.96456	-0.436674	-0.989926	0.45843	-1.55522	-3.08136	-3.84752	1.64007	-6.63856	-2.55282	-4.08341	-0.03143	-0.71029	-1.83656			2.26859	-0.601594	0.054992	-1.46059	-0.558166	-3.50358	7.78546	-0.547022	0.40117	-2.61503	0.49392	0.7987	8.97224	3.72484	-3.51028	-0.924336	4.76617
2.262	5.05512	-0.743022	5.81314	-1.97133	-0.442512	-1.00349	0.4487	-1.55862	-3.0955	-3.84427	1.64046	-6.6373	-2.56087	-4.09198	-0.039816	-0.720202	-1.84513			2.26292	-0.615118	0.060704	-1.45683	-0.547666	-3.53296	7.75439	-0.575358	0.423766	-2.60959	0.491092	0.745262	8.98289	3.72763	-3.51396	-0.906794	4.77414
2.264	5.07304	-0.72863	5.7927	-1.97876	-0.460488	-1.00745	0.495824	-1.55002	-3.09775	-3.84567	1.64219	-6.63256	-2.60296	-4.08605	-0.04494	-0.716436	-1.81742			2.26185	-0.645218	0.082712	-1.45207	-0.554596	-3.54915	7.77113	-0.547204	0.410466	-2.58411	0.4823	0.734958	8.97562	3.72728	-3.50409	-0.939946	4.83818
2.266	5.06008	-0.735924	5.80164	-1.98575	-0.46809	-1.00594	0.536872	-1.55606	-3.09204	-3.87211	1.64235	-6.63671	-2.58762	-4.07655	-0.038752	-0.727034	-1.88376			2.25954	-0.637308	0.091154	-1.45181	-0.542542	-3.54781	7.76968	-0.542878	0.412048	-2.60112	0.473116	0.727202	8.90385	3.72177	-3.49506	-0.957096	4.84408
2.268	5.08899	-0.74781	5.77835	-1.97805	-0.508382	-0.987154	0.539042	-1.54636	-3.0822	-3.88291	1.65579	-6.62983	-2.58695	-4.06272	-0.056588	-0.639884	-1.93431			2.27672	-0.635096	0.080038	-1.46222	-0.544544	-3.56506	7.81085	-0.549934	0.401394	-2.58556	0.465164	0.751506	8.91001	3.71158	-3.49937	-0.911652	4.80281
2.27	5.09867	-0.724514	5.80502	-1.98093	-0.471982	-0.985488	0.552692	-1.55968	-3.08347	-3.87218	1.66156	-6.62799	-2.58474	-4.06658	-0.042308	-0.582512	-1.9843			2.27322	-0.600236	0.050792	-1.47003	-0.588812	-3.58673	7.85618	-0.545412	0.380268	-2.58819	0.460796	0.75558	8.9432	3.70598	-3.55502	-0.872284	4.75089
2.272	5.08455	-0.751744	5.83446	-1.98226	-0.491204	-0.98315	0.562632	-1.54172	-3.07187	-3.8831	1.65774	-6.60762	-2.54551	-4.08138	-0.029036	-0.494088	-1.99886			2.2856	-0.585508	0.037604	-1.47942	-0.547008	-3.61299	7.84939	-0.557984	0.403158	-2.58492	0.472388	0.772702	8.96531	3.70703	-3.5099	-0.798686	4.72457
2.274	5.05068	-0.786884	5.83884	-1.96545	-0.473956	-1.00118	0.541632	-1.53348	-3.10747	-3.8807	1.66263	-6.63057	-2.61138	-4.08628	-0.067662	-0.470484	-1.94715			2.30257	-0.601762	0.058366	-1.47427	-0.539196	-3.55646	7.84993	-0.564396	0.41797	-2.60473	0.46389	0.764806	8.97924	3.72546	-3.51025	-0.760788	4.69603
2.276	5.04662	-0.767116	5.84912	-1.96484	-0.445578	-1.03467	0.489202	-1.55833	-3.11027	-3.86756	1.66383	-6.64615	-2.63409	-4.09763	-0.07805	-0.490504	-1.86775			2.3182	-0.608328	0.07476	-1.48126	-0.534002	-3.54288	7.83854	-0.569464	0.452648	-2.59736	0.44709	0.74361	8.97834	3.74895	-3.50554	-0.75348	4.67954
2.278	5.01894	-0.766976	5.86865	-1.97163	-0.44142	-1.05599	0.474642	-1.536	-3.11177	-3.86466	1.65241	-6.62595	-2.6907	-4.10351	-0.066864	-0.523488	-1.88822			2.30675	-0.600292	0.108598	-1.48561	-0.542976	-3.52538	7.83448	-0.559468	0.440412	-2.6388	0.458332	0.69489	8.99294	3.77118	-3.53685	-0.730128	4.7081
2.28	5.05883	-0.755692	5.87335	-1.98339	-0.439614	-1.00946	0.461356	-1.56862	-3.11861	-3.86147	1.65371	-6.63961	-2.68898	-4.10581	-0.082614	-0.53984	-1.93246			2.28971	-0.625646	0.107646	-1.49386	-0.566762	-3.55188	7.8506	-0.55055	0.468734	-2.62101	0.470764	0.64498	8.97627	3.78038	-3.50844	-0.738416	4.75607
2.282	5.06659	-0.77322	5.84856	-1.99382	-0.467404	-1.00024	0.473088	-1.57129	-3.10276	-3.85361	1.63741	-6.64243	-2.67186	-4.10178	-0.034664	-0.512806	-1.97324			2.27058	-0.609	0.130662	-1.48481	-0.552524	-3.56966	7.84795	-0.574364	0.457366	-2.60256	0.479094	0.632688	8.95215	3.78802	-3.50652	-0.773598	4.74919
2.284	5.09755	-0.765422	5.81308	-1.99465	-0.465654	-0.997794	0.511434	-1.5855	-3.10743	-3.89537	1.64359	-6.62178	-2.67278	-4.09291	-0.04529	-0.503958	-2.00103			2.28416	-0.604324	0.144256	-1.4719	-0.545314	-3.59906	7.85894	-0.541044	0.460334	-2.60676	0.478352	0.657062	8.94821	3.77142	-3.55659	-0.79051	4.73214
2.286	5.09562	-0.76748	5.80892	-1.99241	-0.471618	-1.02397	0.51149	-1.5654	-3.0969	-3.88489	1.64688	-6.62021	-2.66608	-4.08253	-0.040852	-0.45808	-2.04988			2.29303	-0.608062	0.146328	-1.46955	-0.553448	-3.62965	7.84511	-0.563066	0.415296	-2.63536	0.47446	0.651364	8.9535	3.7644	-3.57057	-0.758618	4.66136
2.288	5.12264	-0.737702	5.79603	-1.98468	-0.471674	-1.02122	0.54411	-1.563	-3.11949	-3.9003	1.65025	-6.58984	-2.63904	-4.08601	-0.050862	-0.399686	-2.08397			2.28532	-0.579404	0.1316	-1.48331	-0.578172	-3.63258	7.87584	-0.565222	0.415884	-2.62175	0.461342	0.699818	8.94572	3.76298	-3.57266	-0.700812	4.63226
2.29	5.12638	-0.744814	5.85313	-1.97683	-0.463134	-1.04628	0.565586	-1.56269	-3.11611	-3.9038	1.65599	-6.62033	-2.68248	-4.08507	-0.06146	-0.355264	-2.07059			2.30003	-0.558264	0.121464	-1.49052	-0.579796	-3.59978	7.89501	-0.57414	0.447734	-2.63375	0.458584	0.680358	8.9788	3.77632	-3.55456	-0.65009	4.60816
2.292	5.10542	-0.780836	5.88097	-1.98374	-0.456876	-1.05035	0.575778	-1.53934	-3.10237	-3.88332	1.67238	-6.62893	-2.7194	-4.10873	-0.078904	-0.294966	-1.99452			2.34055	-0.607348	0.113694	-1.50177	-0.56378	-3.58736	7.92277	-0.572264	0.446068	-2.63571	0.44121	0.685216	8.98618	3.79067	-3.54736	-0.583282	4.60552
2.294	5.06573	-0.781746	5.87938	-1.9734	-0.446362	-1.04719	0.561554	-1.5849	-3.14002	-3.86931	1.67241	-6.63076	-2.77127	-4.11338	-0.066612	-0.314664	-2.00235			2.37955	-0.607068	0.114688	-1.49454	-0.540834	-3.54777	7.92875	-0.562254	0.477232	-2.6481	0.44394	0.624792	9.00617	3.8145	-3.56933	-0.573384	4.62896
2.296	5.05719	-0.764232	5.88056	-1.97362	-0.448574	-1.05447	0.515214	-1.53964	-3.12735	-3.87183	1.67499	-6.62945	-2.78925	-4.11694	-0.071302	-0.372232	-2.02489			2.35448	-0.586838	0.143906	-1.5043	-0.558194	-3.53867	7.92718	-0.557312	0.492282	-2.66832	0.438774	0.578312	9.00648	3.8213	-3.57644	-0.538776	4.66235
2.298	5.03572	-0.77476	5.89557	-1.98654	-0.460992	-1.04717	0.481138	-1.56632	-3.13354	-3.8634	1.67107	-6.64962	-2.74005	-4.10598	-0.046298	-0.370356	-2.06437			2.36314	-0.619542	0.163212	-1.50906	-0.566048	-3.55046	7.91468	-0.57694	0.507248	-2.65975	0.43393	0.576562	8.97382	3.83953	-3.54669	-0.56525	4.66549
2.3	5.07276	-0.76013	5.89179	-1.98982	-0.466326	-1.06042	0.481264	-1.55193	-3.10838	-3.87017	1.66951	-6.62182	-2.74756	-4.09853	-0.054306	-0.36281	-2.13157			2.32824	-0.62062	0.198688	-1.51215	-0.567812	-3.60958	7.91813	-0.562464	0.490322	-2.64457	0.429394	0.588042	8.95842	3.83608	-3.57937	-0.590226	4.64255
2.302	5.10135	-0.784672	5.83785	-1.98827	-0.477792	-1.05244	0.468678	-1.57721	-3.12021	-3.90823	1.66506	-6.63933	-2.74453	-4.0903	-0.037758	-0.339346	-2.14521			2.313	-0.623686	0.22232	-1.50157	-0.565222	-3.58926	7.92375	-0.587328	0.480046	-2.63654	0.439628	0.592018	8.95213	3.80953	-3.59702	-0.564018	4.58427
2.304	5.11627	-0.761698	5.85915	-1.98967	-0.464758	-1.07372	0.513464	-1.58479	-3.11774	-3.9094	1.66319	-6.60076	-2.76636	-4.1057	-0.062132	-0.30814	-2.21673			2.32438	-0.630728	0.198492	-1.49814	-0.560938	-3.58714	7.91808	-0.573734	0.465206	-2.65551	0.436436	0.613998	8.97137	3.80296	-3.62142	-0.550956	4.5543
2.306	5.13033	-0.751856	5.84431	-1.98587	-0.464268	-1.10289	0.539196	-1.56891	-3.13359	-3.90519	1.65654	-6.62704	-2.72996	-4.10823	-0.072254	-0.247198	-2.18994			2.35187	-0.618926	0.175532	-1.49996	-0.544698	-3.58989	7.91402	-0.567154	0.465542	-2.64765	0.440692	0.632996	8.99017	3.80702	-3.61159	-0.48069	4.56728
2.308	5.15684	-0.764554	5.85574	-1.98884	-0.456764	-1.10225	0.551096	-1.56717	-3.12522	-3.91161	1.66209	-6.63645	-2.77837	-4.10476	-0.090272	-0.187404	-2.11042			2.36141	-0.592914	0.166922	-1.50878	-0.565908	-3.59603	7.91946	-0.572222	0.467054	-2.6787	0.447636	0.603162	9.00547	3.83635	-3.59103	-0.397194	4.55622
2.31	5.16047	-0.793338	5.88703	-1.98958	-0.447692	-1.11537	0.54502	-1.56761	-3.15154	-3.88338	1.66076	-6.62376	-2.80997	-4.11443	-0.107576	-0.155778	-2.09202			2.37187	-0.635502	0.1708	-1.5234	-0.556738	-3.60004	7.96379	-0.575372	0.48384	-2.70581	0.449372	0.563724	9.03011	3.86674	-3.5793	-0.363468	4.54664
2.312	5.14489	-0.795004	5.90365	-1.9958	-0.462994	-1.11679	0.553112	-1.5814	-3.16225	-3.8654	1.66671	-6.65203	-2.82667	-4.12089	-0.085414	-0.221256	-2.11946			2.35781	-0.62601	0.184044	-1.54041	-0.538902	-3.55697	7.98804	-0.589106	0.492856	-2.69783	0.439418	0.528976	9.01874	3.87594	-3.57409	-0.364588	4.54895
2.314	5.15001	-0.801388	5.89229	-1.99119	-0.477008	-1.11087	0.513352	-1.56667	-3.14111	-3.85634	1.66673	-6.65232	-2.85356	-4.12562	-0.0833	-0.227598	-2.16884			2.35427	-0.638834	0.207802	-1.52734	-0.539098	-3.53056	8.01279	-0.571508	0.491946	-2.68253	0.429604	0.486192	9.02471	3.87341	-3.62218	-0.38808	4.60788
2.316	5.1248	-0.796964	5.90629	-1.99447	-0.474964	-1.11349	0.458052	-1.56478	-3.13663	-3.87478	1.66747	-6.64469	-2.8351	-4.11545	-0.065688	-0.21784	-2.1988			2.37058	-0.635894	0.241262	-1.52895	-0.54943	-3.56154	8.00906	-0.558222	0.504658	-2.68044	0.42735	0.49357	8.99361	3.87163	-3.58492	-0.403298	4.58917
2.318	5.12821	-0.753858	5.89988	-1.98873	-0.455616	-1.09871	0.451388	-1.57948	-3.15708	-3.89722	1.68305	-6.62281	-2.81103	-4.11172	-0.06587	-0.185682	-2.23523			2.41626	-0.621992	0.23737	-1.51091	-0.55797	-3.61053	8.00894	-0.573398	0.472766	-2.64754	0.416304	0.527156	8.96697	3.86802	-3.62722	-0.4018	4.53326
2.32	5.1417	-0.76559	5.87447	-1.98545	-0.442288	-1.10781	0.415282	-1.56948	-3.14329	-3.92288	1.68503	-6.61091	-2.80426	-4.10269	-0.084336	-0.182196	-2.28988			2.39302	-0.639758	0.234458	-1.51683	-0.570416	-3.61269	7.99484	-0.577346	0.48944	-2.65646	0.415828	0.550564	9.00771	3.85746	-3.61616	-0.377902	4.47664
2.322	5.15075	-0.760116	5.86828	-2.00537	-0.468034	-1.09798	0.43148	-1.5652	-3.13743	-3.94078	1.69285	-6.6215	-2.82864	-4.10806	-0.075138	-0.115948	-2.31287			2.36197	-0.63483	0.266994	-1.51953	-0.567294	-3.58159	7.9648	-0.603302	0.480564	-2.69968	0.415408	0.55125	9.03419	3.85258	-3.6457	-0.303954	4.43295
2.324	5.1703	-0.766864	5.86814	-1.99791	-0.446138	-1.12392	0.50253	-1.59701	-3.15503	-3.93432	1.68813	-6.63005	-2.85788	-4.11033	-0.084378	-0.06993	-2.29607			2.36484	-0.631876	0.265174	-1.51899	-0.568624	-3.56933	7.99152	-0.604632	0.442372	-2.70371	0.40852	0.553364	9.02478	3.86022	-3.64853	-0.207774	4.45252
2.326	5.18616	-0.74648	5.84884	-1.99844	-0.445046	-1.14409	0.536732	-1.59656	-3.16443	-3.92564	1.6771	-6.62719	-2.88609	-4.11538	-0.124684	-0.041524	-2.25263			2.35008	-0.602784	0.249242	-1.53164	-0.565124	-3.55326	8.00785	-0.582974	0.47894	-2.70229	0.41251	0.507808	9.05967	3.89389	-3.65046	-0.142954	4.40336
2.328	5.18181	-0.800212	5.89026	-1.9969	-0.482552	-1.16066	0.534506	-1.57049	-3.16485	-3.90197	1.67822	-6.62963	-2.92029	-4.11732	-0.106064	-0.097706	-2.17022			2.36984	-0.588238	0.225848	-1.54059	-0.554344	-3.57581	8.00134	-0.602224	0.470764	-2.71629	0.42441	0.47047	9.05069	3.92539	-3.59838	-0.158186	4.42316
2.33	5.1833	-0.782838	5.88717	-2.00732	-0.503594	-1.14575	0.514234	-1.57601	-3.18669	-3.87667	1.66818	-6.62339	-2.8993	-4.11909	-0.073066	-0.07595	-2.19643			2.36965	-0.62951	0.235536	-1.55389	-0.58758	-3.61514	8.04397	-0.582106	0.48769	-2.75064	0.42217	0.419944	9.03167	3.93869	-3.60213	-0.186858	4.45579
2.332	5.20937	-0.798476	5.89224	-1.99809	-0.518672	-1.127	0.530194	-1.57289	-3.17927	-3.88455	1.66673	-6.60698	-2.95926	-4.1127	-0.055104	-0.09289	-2.27767			2.40086	-0.62615	0.229698	-1.54595	-0.55461	-3.64445	8.07149	-0.580118	0.453544	-2.72282	0.427854	0.437178	9.00564	3.93162	-3.63819	-0.20909	4.47549
2.334	5.17377	-0.782642	5.91307	-1.99961	-0.50491	-1.11166	0.510188	-1.57917	-3.18451	-3.89413	1.66986	-6.62157	-2.88232	-4.11421	-0.062846	-0.09765	-2.32407			2.45127	-0.640738	0.279272	-1.55471	-0.55475	-3.64437	8.09325	-0.59115	0.493248	-2.71202	0.425656	0.425544	8.98302	3.91157	-3.65957	-0.209888	4.4781
2.336	5.13902	-0.773626	5.91102	-1.98943	-0.486122	-1.13173	0.441308	-1.5672	-3.1843	-3.92291	1.67688	-6.61031	-2.88352	-4.1075	-0.080094	-0.084182	-2.3662			2.46145	-0.654248	0.293216	-1.54351	-0.554666	-3.63562	8.07962	-0.58842	0.507528	-2.68457	0.418754	0.437444	9.01317	3.91594	-3.66047	-0.165746	4.43542
2.338	5.14858	-0.758534	5.8968	-2.00396	-0.469154	-1.15875	0.447132	-1.5785	-3.16574	-3.94579	1.67623	-6.61233	-2.93286	-4.10612	-0.095368	-0.041818	-2.40947			2.45178	-0.64022	0.313334	-1.55407	-0.554246	-3.62513	8.076	-0.593796	0.508214	-2.70794	0.408688	0.475454	9.02436	3.91073	-3.68161	-0.084714	4.3174
2.34	5.1724	-0.777224	5.86473	-2.00948	-0.453278	-1.13558	0.425376	-1.58998	-3.17044	-3.96634	1.68617	-6.64348	-2.9477	-4.11169	-0.105756	-0.006412	-2.39865			2.4472	-0.671216	0.317366	-1.55361	-0.548086	-3.61896	8.06642	-0.58751	0.480984	-2.73241	0.40075	0.451038	9.05605	3.92154	-3.64158	-0.02107	4.35343
2.342	5.18367	-0.781662	5.89091	-2.01646	-0.478128	-1.14087	0.465178	-1.56943	-3.19689	-3.98425	1.69779	-6.65612	-2.99282	-4.12369	-0.10486	0.052332	-2.38837			2.43573	-0.622804	0.310534	-1.55956	-0.565138	-3.58113	8.06175	-0.59598	0.427112	-2.71046	0.39515	0.465136	9.04995	3.94246	-3.67833	0.046312	4.34456
2.344	5.1861	-0.743554	5.87311	-2.02041	-0.512666	-1.16663	0.531034	-1.59811	-3.20894	-3.95599	1.70121	-6.64951	-3.02162	-4.13354	-0.106022	0.088802	-2.26899			2.42085	-0.617092	0.30954	-1.54496	-0.571424	-3.5966	8.06862	-0.614348	0.429044	-2.73167	0.390978	0.401184	9.04674	3.96726	-3.63416	0.1071	4.32083
2.346	5.18269	-0.799204	5.8806	-2.0123	-0.535108	-1.15217	0.53403	-1.58329	-3.23492	-3.9452	1.7031	-6.65672	-3.02081	-4.132	-0.08687	0.053704	-2.31431			2.43466	-0.590114	0.293622	-1.54323	-0.55517	-3.58096	8.0745	-0.606802	0.456652	-2.75846	0.391062	0.376096	9.04516	3.98105	-3.62768	0.09079	4.35054
2.348	5.19091	-0.80108	5.88916	-2.0042	-0.506072	-1.13539	0.53235	-1.56883	-3.22213	-3.92756	1.70111	-6.6387	-3.00336	-4.12558	-0.071694	0.034678	-2.34381			2.45181	-0.61894	0.302946	-1.54507	-0.56763	-3.60895	8.07779	-0.601398	0.452466	-2.75419	0.388752	0.371	8.99038	3.9948	-3.66045	0.079492	4.41097
2.35	5.18696	-0.766668	5.88839	-2.00546	-0.499842	-1.13673	0.538384	-1.58049	-3.21793	-3.92883	1.6976	-6.61212	-3.0029	-4.11373	-0.098406	0.023086	-2.44595			2.42745	-0.620144	0.2947	-1.5672	-0.581308	-3.58677	8.127	-0.61453	0.466592	-2.74053	0.385168	0.386918	8.96826	3.98535	-3.66572	0.028952	4.38476
2.352	5.17544	-0.788214	5.89595	-2.0148	-0.513268	-1.14808	0.546952	-1.59277	-3.20874	-3.96264	1.69203	-6.6074	-3.02365	-4.1041	-0.10388	0.047894	-2.45237			2.4729	-0.646646	0.325556	-1.58847	-0.544558	-3.58845	8.12062	-0.597562	0.470652	-2.74046	0.400582	0.410998	9.01155	3.96368	-3.66513	0.002646	4.35992
2.354	5.14842	-0.772926	5.90257	-2.00917	-0.479248	-1.17811	0.489216	-1.59557	-3.24419	-3.97729	1.68455	-6.59011	-3.04409	-4.11145	-0.107338	0.037058	-2.48998			2.50996	-0.651294	0.346948	-1.58326	-0.56371	-3.59958	8.14547	-0.606256	0.501088	-2.7475	0.408744	0.409528	9.02147	3.95816	-3.65063	-0.001638	4.30006
2.356	5.15791	-0.773416	5.88144	-2.00936	-0.46389	-1.18194	0.456708	-1.59691	-3.22526	-3.98727	1.68795	-6.63552	-3.03705	-4.11221	-0.10521	0.05334	-2.47219			2.52396	-0.651826	0.36666	-1.56986	-0.563892	-3.60221	8.12063	-0.60522	0.485562	-2.76612	0.406756	0.425488	9.04466	3.96444	-3.69634	0.06454	4.27294
2.358	5.15421	-0.76986	5.88942	-2.00456	-0.478352	-1.19574	0.443478	-1.58085	-3.19001	-3.99284	1.68735	-6.61156	-3.08673	-4.12104	-0.098686	0.108738	-2.46149			2.50645	-0.657482	0.36141	-1.56554	-0.55937	-3.60219	8.11797	-0.613004	0.454538	-2.76454	0.40859	0.382214	9.05283	3.99274	-3.72201	0.148414	4.26171
2.36	5.16411	-0.75628	5.88486	-2.01492	-0.506226	-1.18759	0.449008	-1.60665	-3.1947	-3.96852	1.68235	-6.61616	-3.13685	-4.13134	-0.130732	0.122766	-2.3918			2.46287	-0.648466	0.368298	-1.56779	-0.555604	-3.55513	8.15045	-0.609854	0.4515	-2.75293	0.406938	0.342258	9.07663	4.02282	-3.65215	0.236782	4.23318
2.362	5.18161	-0.763364	5.89544	-2.02698	-0.518154	-1.20105	0.457982	-1.59039	-3.21125	-3.97065	1.69569	-6.60911	-3.12256	-4.13517	-0.088508	0.149156	-2.38472			2.47778	-0.606256	0.378518	-1.57583	-0.571508	-3.56051	8.13284	-0.607488	0.481264	-2.77113	0.385532	0.322854	9.05134	4.04127	-3.68381	0.29659	4.20694
2.364	5.21371	-0.774242	5.87364	-2.01099	-0.5299	-1.16936	0.496692	-1.59125	-3.22617	-3.97156	1.70351	-6.59945	-3.083	-4.1298	-0.083636	0.061586	-2.4033			2.47841	-0.59962	0.382816	-1.56285	-0.583128	-3.56894	8.12095	-0.617386	0.47642	-2.80049	0.376628	0.290458	9.0134	4.04292	-3.67592	0.280896	4.30437
2.366	5.20171	-0.798266	5.87474	-2.01412	-0.526974	-1.19223	0.51611	-1.62393	-3.23446	-3.9612	1.70624	-6.58141	-3.08279	-4.12436	-0.1008	0.068852	-2.49491			2.51206	-0.621264	0.365344	-1.57517	-0.56854	-3.60571	8.14671	-0.625884	0.457968	-2.79734	0.369572	0.315812	9.02006	4.03707	-3.69445	0.270116	4.28946
2.368	5.21576	-0.773612	5.91205	-2.01368	-0.515886	-1.18464	0.509516	-1.60044	-3.24107	-3.97236	1.70556	-6.57478	-3.12733	-4.1165	-0.12537	0.103936	-2.52868			2.52608	-0.610008	0.365358	-1.58042	-0.581938	-3.60307	8.15009	-0.602098	0.474166	-2.76042	0.374976	0.353766	9.03391	4.01442	-3.69502	0.271194	4.25438
2.37	5.21749	-0.78505	5.91559	-2.01729	-0.477386	-1.20754	0.48685	-1.5988	-3.23949	-3.99802	1.71423	-6.60275	-3.1256	-4.11333	-0.12901	0.123256	-2.58905			2.51653	-0.612948	0.361158	-1.59144	-0.594132	-3.62312	8.16084	-0.6223	0.502418	-2.76405	0.371532	0.3605	9.05629	4.00435	-3.68414	0.24654	4.19558
2.372	5.18497	-0.771148	5.90356	-2.01824	-0.4914	-1.22609	0.488208	-1.61213	-3.24288	-3.98693	1.70813	-6.60516	-3.15659	-4.11729	-0.128394	0.136164	-2.60646			2.55721	-0.626808	0.383488	-1.60748	-0.556164	-3.62575	8.1635	-0.6069	0.500388	-2.75799	0.370328	0.33621	9.06447	4.00905	-3.67872	0.3017	4.14827
2.374	5.14196	-0.769356	5.9201	-2.01219	-0.50946	-1.22784	0.43876	-1.60259	-3.25382	-3.99244	1.71003	-6.60124	-3.16533	-4.126	-0.128884	0.16093	-2.57818			2.55566	-0.624316	0.42847	-1.60273	-0.578326	-3.60762	8.19238	-0.622986	0.500584	-2.7852	0.368634	0.31752	9.0699	4.04194	-3.70618	0.366744	4.14975
2.376	5.15266	-0.783146	5.91007	-2.00263	-0.518168	-1.21377	0.427784	-1.59956	-3.2255	-3.98833	1.70932	-6.59523	-3.19459	-4.13909	-0.130438	0.160832	-2.50614			2.57337	-0.630826	0.416906	-1.6029	-0.577836	-3.61687	8.18969	-0.617736	0.476924	-2.77693	0.380352	0.273084	9.06934	4.0665	-3.71848	0.470358	4.17694
2.378	5.17982	-0.787458	5.8966	-1.99555	-0.49896	-1.24411	0.412594	-1.60982	-3.24267	-3.98045	1.69819	-6.61786	-3.21787	-4.14366	-0.126798	0.203042	-2.47435			2.57001	-0.636426	0.444836	-1.58584	-0.5866	-3.58077	8.20747	-0.625856	0.481614	-2.79478	0.377328	0.264936	9.06489	4.07975	-3.70058	0.53473	4.15542
2.38	5.19446	-0.75544	5.89855	-2.01664	-0.501382	-1.22311	0.418978	-1.60094	-3.23018	-3.94619	1.68462	-6.58826	-3.17923	-4.13552	-0.13832	0.193606	-2.47169			2.52027	-0.593138	0.448504	-1.58514	-0.569436	-3.59523	8.17858	-0.627704	0.482356	-2.82845	0.37961	0.25165	9.05339	4.09898	-3.69225	0.584612	4.17222
2.382	5.23604	-0.777336	5.85833	-2.02184	-0.498134	-1.21379	0.440972	-1.62089	-3.26745	-3.96299	1.69375	-6.56806	-3.19904	-4.12807	-0.1197	0.129402	-2.55528			2.49921	-0.55832	0.472248	-1.59764	-0.586922	-3.58169	8.19823	-0.617568	0.487032	-2.8307	0.38682	0.26971	9.03178	4.0874	-3.72152	0.52031	4.24035
2.384	5.24194	-0.829094	5.86426	-2.03381	-0.505764	-1.1949	0.469406	-1.5952	-3.25136	-3.9656	1.69688	-6.56009	-3.19253	-4.12181	-0.122318	0.135296	-2.5864			2.52837	-0.60767	0.461482	-1.60633	-0.588028	-3.60515	8.19683	-0.611366	0.495068	-2.79231	0.384062	0.294868	9.02299	4.07385	-3.73124	0.52486	4.19415
2.386	5.24789	-0.824572	5.85224	-2.02184	-0.505652	-1.2306	0.486654	-1.63289	-3.2677	-3.98479	1.7031	-6.59007	-3.18676	-4.13188	-0.135016	0.165564	-2.63528			2.56369	-0.618492	0.441826	-1.60979	-0.570024	-3.59268	8.21031	-0.640626	0.471786	-2.80596	0.371028	0.306838	9.03605	4.05605	-3.74002	0.496468	4.13788
2.388	5.2502	-0.785358	5.89151	-2.01916	-0.502614	-1.25588	0.468202	-1.62464	-3.24855	-3.98042	1.70612	-6.6138	-3.24402	-4.13221	-0.149982	0.195776	-2.68125			2.58822	-0.629804	0.451472	-1.59552	-0.576758	-3.59925	8.26363	-0.630644	0.494928	-2.80085	0.36015	0.276486	9.05195	4.06666	-3.73391	0.489776	4.09319
2.39	5.27376	-0.78974	5.9325	-2.0134	-0.498386	-1.25717	0.459998	-1.60413	-3.27649	-3.99126	1.70971	-6.60943	-3.29715	-4.14057	-0.173754	0.203868	-2.6922			2.56256	-0.63301	0.44233	-1.60957	-0.582568	-3.62215	8.26039	-0.623126	0.528052	-2.81796	0.354172	0.22512	9.05835	4.09366	-3.71587	0.575414	4.04047
2.392	5.21402	-0.774942	5.92173	-2.00487	-0.512904	-1.26365	0.491218	-1.62464	-3.25331	-4.0049	1.7178	-6.61219	-3.26381	-4.14613	-0.130844	0.218386	-2.66806			2.58287	-0.65296	0.442232	-1.62679	-0.54789	-3.62148	8.22298	-0.616756	0.52843	-2.83347	0.350966	0.221648	9.0755	4.12772	-3.71409	0.662648	4.06822
2.394	5.19844	-0.785932	5.93135	-2.00865	-0.512582	-1.25936	0.432292	-1.60721	-3.23936	-4.00389	1.71233	-6.6122	-3.27722	-4.14691	-0.133882	0.23835	-2.57106			2.59689	-0.652358	0.478576	-1.6291	-0.56623	-3.58996	8.29279	-0.619486	0.512624	-2.83074	0.35133	0.194306	9.06146	4.13524	-3.74429	0.733544	4.04188
2.396	5.19777	-0.78624	5.90772	-2.01659	-0.504406	-1.27225	0.425936	-1.60943	-3.23779	-3.97104	1.72256	-6.57413	-3.26185	-4.14148	-0.148988	0.249984	-2.54621			2.61101	-0.65562	0.488908	-1.61118	-0.57687	-3.56504	8.28261	-0.621516	0.479164	-2.84189	0.348264	0.212674	9.04485	4.12952	-3.76307	0.76818	4.03565
2.398	5.21083	-0.786576	5.91409	-2.0291	-0.503622	-1.27851	0.388038	-1.62009	-3.24765	-3.97676	1.72288	-6.58048	-3.26311	-4.13554	-0.154644	0.217742	-2.6046			2.63431	-0.642782	0.53606	-1.60091	-0.585634	-3.5691	8.31352	-0.621572	0.498526	-2.84011	0.349104	0.216664	9.05817	4.11306	-3.74427	0.764932	4.07709
2.4	5.23916	-0.762272	5.88144	-2.03162	-0.488068	-1.27067	0.421036	-1.61458	-3.26136	-4.00438	1.70934	-6.60542	-3.27845	-4.12887	-0.16324	0.202706	-2.66435			2.61311	-0.598528	0.548506	-1.61081	-0.557956	-3.57526	8.28867	-0.647864	0.509782	-2.87937	0.352856	0.230062	9.06343	4.10124	-3.76054	0.744548	4.10745
2.402	5.22655	-0.785876	5.86937	-2.02808	-0.491078	-1.25206	0.432264	-1.62816	-3.2576	-3.99732	1.69758	-6.64898	-3.25844	-4.13211	-0.181916	0.213962	-2.71302			2.58805	-0.613256	0.543522	-1.61414	-0.587132	-3.6126	8.27138	-0.626892	0.521038	-2.84918	0.360402	0.212268	9.03679	4.10687	-3.78764	0.73437	4.0375
2.404	5.2345	-0.808864	5.8623	-2.02964	-0.497028	-1.25656	0.432642	-1.59026	-3.27881	-3.99531	1.69714	-6.63439	-3.31677	-4.1336	-0.17689	0.21581	-2.78137			2.60792	-0.637728	0.550172	-1.6259	-0.575008	-3.61161	8.2678	-0.618744	0.52283	-2.86772	0.36715	0.196154	9.05155	4.12875	-3.74174	0.72947	3.98815
2.406	5.23817	-0.814268	5.86813	-2.01306	-0.51072	-1.26225	0.42021	-1.60472	-3.28887	-3.99178	1.70722	-6.63988	-3.31527	-4.14866	-0.17983	0.235228	-2.81247			2.62249	-0.658812	0.537502	-1.61867	-0.565432	-3.60847	8.27007	-0.650986	0.599214	-2.84024	0.366254	0.154924	9.0712	4.15008	-3.77577	0.76937	3.93567
2.408	5.26271	-0.806414	5.88983	-2.0004	-0.528696	-1.27491	0.399854	-1.63332	-3.29792	-3.99848	1.71373	-6.62402	-3.39199	-4.16319	-0.171024	0.261086	-2.79635			2.6348	-0.6545	0.511224	-1.62904	-0.559342	-3.62531	8.32079	-0.635768	0.603484	-2.83427	0.37065	0.128982	9.06016	4.16462	-3.74102	0.810488	3.95196
2.41	5.26261	-0.801276	5.92066	-2.00501	-0.541464	-1.30605	0.387086	-1.61022	-3.25899	-4.01248	1.71665	-6.6193	-3.37144	-4.16335	-0.168952	0.279272	-2.74681			2.62655	-0.629384	0.517118	-1.62884	-0.584584	-3.6184	8.3481	-0.643524	0.58723	-2.85488	0.358344	0.127386	9.09345	4.19058	-3.78549	0.91679	3.91598
2.412	5.23818	-0.809256	5.93184	-2.01159	-0.526666	-1.32829	0.391636	-1.61284	-3.27669	-4.00697	1.70878	-6.59362	-3.34092	-4.14819	-0.163856	0.300664	-2.66977			2.63521	-0.623476	0.550508	-1.64195	-0.564438	-3.61057	8.32468	-0.638414	0.562324	-2.88075	0.349272	0.147994	9.07855	4.19461	-3.77077	0.970438	3.9103
2.414	5.22761	-0.793982	5.92724	-2.0278	-0.52962	-1.30059	0.377132	-1.62448	-3.26553	-3.98903	1.7248	-6.60218	-3.33656	-4.13991	-0.15603	0.291746	-2.69317			2.65734	-0.626262	0.57064	-1.64661	-0.573636	-3.60991	8.33608	-0.635684	0.541072	-2.89741	0.339864	0.16996	9.04628	4.18218	-3.77182	0.963578	3.94351
2.416	5.213	-0.81368	5.91406	-2.03505	-0.49399	-1.30407	0.375242	-1.63724	-3.27688	-3.96785	1.73019	-6.59575	-3.31533	-4.13644	-0.185584	0.25732	-2.72373			2.66412	-0.629398	0.59255	-1.62593	-0.5747	-3.61315	8.34463	-0.626276	0.55146	-2.89722	0.338058	0.17815	9.04833	4.15799	-3.75544	0.945378	4.01965
2.418	5.23642	-0.779226	5.89716	-2.02838	-0.49112	-1.28115	0.374388	-1.62428	-3.28048	-3.98404	1.73989	-6.60842	-3.35366	-4.1515	-0.194516	0.25578	-2.77936			2.67035	-0.611422	0.585228	-1.62326	-0.56098	-3.63278	8.34121	-0.640262	0.542752	-2.89776	0.326732	0.159264	9.09238	4.14982	-3.82302	0.915432	4.00816
2.42	5.26343	-0.807814	5.85841	-2.01617	-0.478632	-1.28045	0.373422	-1.61461	-3.31129	-3.97495	1.74021	-6.62997	-3.34398	-4.15363	-0.19901	0.281372	-2.77731			2.63984	-0.620676	0.622272	-1.63068	-0.584248	-3.63612	8.3252	-0.655676	0.631974	-2.88886	0.321608	0.118006	9.12733	4.16199	-3.77667	0.912058	3.94052
2.422	5.2617	-0.831586	5.87632	-2.00137	-0.48867	-1.31125	0.392714	-1.63159	-3.29603	-3.97607	1.73842	-6.62925	-3.34628	-4.1568	-0.200634	0.296814	-2.87141			2.64573	-0.640388	0.633248	-1.64333	-0.580286	-3.63175	8.33125	-0.656586	0.630266	-2.89584	0.325178	0.095704	9.1315	4.1865	-3.76361	0.918792	3.88994
2.424	5.26774	-0.807338	5.88683	-2.01478	-0.508844	-1.3285	0.370048	-1.64461	-3.29297	-3.98896	1.73468	-6.62239	-3.40556	-4.16374	-0.200844	0.318234	-2.86978			2.67922	-0.636566	0.591024	-1.65686	-0.586544	-3.62103	8.34659	-0.6433	0.592676	-2.89747	0.32109	0.056406	9.14553	4.21946	-3.78889	1.00687	3.83449
2.426	5.29183	-0.796516	5.90421	-2.02241	-0.527282	-1.32446	0.366324	-1.63083	-3.31223	-3.9853	1.7267	-6.62299	-3.37945	-4.16951	-0.203476	0.337148	-2.82577			2.67789	-0.65093	0.584388	-1.65299	-0.576702	-3.62684	8.34669	-0.65177	0.617218	-2.87624	0.3318	0.05446	9.1348	4.22996	-3.78594	1.10298	3.82609
2.428	5.30439	-0.80703	5.91051	-2.0187	-0.54649	-1.34002	0.355138	-1.63835	-3.29048	-3.99799	1.71821	-6.59177	-3.39146	-4.15975	-0.170002	0.355628	-2.74687			2.70522	-0.656992	0.576996	-1.65711	-0.581658	-3.62928	8.37297	-0.654192	0.600236	-2.88855	0.337596	0.051898	9.11732	4.22702	-3.77653	1.17699	3.82806
2.43	5.29081	-0.805518	5.87749	-2.02308	-0.521416	-1.33014	0.332878	-1.62998	-3.3059	-4.00289	1.70533	-6.60185	-3.36531	-4.154	-0.170226	0.337358	-2.7064			2.69723	-0.638078	0.58156	-1.63842	-0.566594	-3.61287	8.36577	-0.666862	0.575232	-2.88316	0.342664	0.08155	9.09364	4.21673	-3.80268	1.19692	3.79513
2.432	5.27885	-0.802816	5.88031	-2.02959	-0.517608	-1.35862	0.333592	-1.64087	-3.3115	-4.00141	1.71741	-6.59152	-3.3969	-4.14226	-0.18228	0.28952	-2.75741			2.71247	-0.643594	0.635642	-1.64314	-0.581406	-3.63544	8.40157	-0.652876	0.589624	-2.90303	0.342132	0.114072	9.10402	4.21576	-3.78097	1.1964	3.87776
2.434	5.24097	-0.790986	5.89534	-2.03284	-0.513828	-1.31956	0.361452	-1.65	-3.29242	-3.99795	1.71165	-6.60015	-3.386	-4.15477	-0.183694	0.301924	-2.8537			2.72402	-0.63791	0.641354	-1.64328	-0.599494	-3.5943	8.37649	-0.648004	0.606998	-2.89316	0.341796	0.087052	9.14563	4.19674	-3.8325	1.17188	3.88241
2.436	5.24605	-0.795424	5.88438	-2.03337	-0.501718	-1.34173	0.347326	-1.63568	-3.30946	-3.99448	1.72572	-6.61681	-3.43034	-4.1638	-0.198394	0.318248	-2.90228			2.7307	-0.622272	0.662956	-1.64438	-0.573818	-3.6029	8.40764	-0.64176	0.608958	-2.92677	0.336196	0.069118	9.17279	4.2163	-3.82393	1.1527	3.87366
2.438	5.26334	-0.803628	5.88853	-2.01544	-0.5054	-1.3347	0.330526	-1.63947	-3.31569	-3.98924	1.72498	-6.61168	-3.49126	-4.16543	-0.224392	0.349482	-2.95211			2.73274	-0.618562	0.65576	-1.64657	-0.57932	-3.5806	8.42086	-0.650216	0.612038	-2.88949	0.319802	0.02765	9.17165	4.22853	-3.80689	1.13999	3.81056
2.44	5.30653	-0.830592	5.85194	-2.01488	-0.508942	-1.36097	0.34825	-1.63862	-3.3377	-3.99697	1.73285	-6.6157	-3.46329	-4.17316	-0.203588	0.340494	-2.99694			2.70185	-0.647906	0.671664	-1.64798	-0.589316	-3.57279	8.40389	-0.652204	0.616266	-2.91633	0.308588	-0.015932	9.16376	4.26371	-3.79599	1.19553	3.72763
2.442	5.31436	-0.828968	5.84381	-2.01267	-0.515816	-1.36709	0.350014	-1.64102	-3.32954	-4.01859	1.73589	-6.59467	-3.48279	-4.17525	-0.203168	0.356748	-2.99519			2.71179	-0.627676	0.694134	-1.66424	-0.585088	-3.59505	8.39864	-0.644896	0.681128	-2.91145	0.302918	-0.013454	9.14728	4.29068	-3.80502	1.30042	3.71815
2.444	5.31513	-0.818538	5.86352	-2.01821	-0.516026	-1.38676	0.34475	-1.62392	-3.32283	-4.02935	1.73858	-6.55703	-3.45993	-4.17334	-0.186494	0.349888	-2.93458			2.70008	-0.60977	0.666106	-1.67467	-0.586782	-3.61354	8.38804	-0.650692	0.634718	-2.92319	0.296604	0.00301	9.11019	4.29702	-3.79476	1.39724	3.71486
2.446	5.34052	-0.829766	5.84709	-2.03788	-0.516264	-1.3803	0.314888	-1.62415	-3.2923	-4.03273	1.74565	-6.56411	-3.50778	-4.1592	-0.197344	0.358554	-2.85109			2.72423	-0.653198	0.677614	-1.66641	-0.608048	-3.59433	8.41737	-0.640374	0.633136	-2.92275	0.299782	0.009926	9.09213	4.27799	-3.80213	1.45159	3.73152
2.448	5.35311	-0.8281	5.88497	-2.03491	-0.523474	-1.37164	0.319676	-1.62427	-3.30914	-4.04418	1.75175	-6.55605	-3.50078	-4.14956	-0.197708	0.3262	-2.90595			2.74806	-0.643468	0.657818	-1.65845	-0.580762	-3.57623	8.43476	-0.668696	0.600208	-2.91165	0.29631	0.035784	9.11361	4.25554	-3.79483	1.44521	3.76062
2.45	5.32903	-0.799736	5.91451	-2.0211	-0.49196	-1.3791	0.30632	-1.6567	-3.33171	-4.03606	1.73407	-6.61184	-3.46924	-4.14758	-0.210994	0.328818	-2.97786			2.75281	-0.65618	0.665406	-1.64836	-0.579292	-3.6014	8.45827	-0.656712	0.608426	-2.92884	0.298312	0.023324	9.14813	4.25793	-3.84763	1.40603	3.8061
2.452	5.28507	-0.822612	5.92682	-2.02423	-0.497448	-1.37725	0.314006	-1.65519	-3.31199	-4.02822	1.72838	-6.60722	-3.49251	-4.15929	-0.222502	0.308406	-2.97149			2.74788	-0.639198	0.679014	-1.65206	-0.585802	-3.60455	8.45218	-0.665602	0.592606	-2.9477	0.29715	-8.4e-05	9.16786	4.2695	-3.80374	1.40174	3.76496
2.454	5.27597	-0.81277	5.89785	-2.0125	-0.499072	-1.37133	0.30387	-1.64979	-3.33686	-4.03243	1.7247	-6.58685	-3.53763	-4.15897	-0.194964	0.330204	-3.03386			2.76448	-0.642334	0.716842	-1.6723	-0.592746	-3.63126	8.4553	-0.671048	0.604324	-2.92659	0.30471	-0.049168	9.16611	4.28666	-3.811	1.38855	3.71554
2.456	5.27719	-0.844508	5.89513	-2.02314	-0.525378	-1.40868	0.2947	-1.63001	-3.33714	-4.04118	1.72288	-6.59679	-3.55916	-4.17196	-0.222964	0.33929	-3.11685			2.76199	-0.602532	0.735308	-1.67455	-0.568316	-3.58123	8.47609	-0.678468	0.638484	-2.9378	0.307118	-0.084336	9.15274	4.31347	-3.81954	1.40577	3.64848
2.458	5.28801	-0.867916	5.86813	-2.02546	-0.534184	-1.40522	0.296184	-1.63979	-3.35885	-4.05656	1.72949	-6.59606	-3.56637	-4.17575	-0.209692	0.343952	-3.111			2.75505	-0.611058	0.783776	-1.68792	-0.575974	-3.55793	8.48277	-0.662298	0.627676	-2.93356	0.317828	-0.103684	9.16112	4.32894	-3.85041	1.46755	3.59104
2.46	5.32182	-0.84707	5.84654	-2.02139	-0.513884	-1.41693	0.275058	-1.61865	-3.34708	-4.06384	1.74226	-6.60902	-3.54698	-4.17311	-0.19838	0.353598	-3.05788			2.77777	-0.63056	0.780234	-1.68552	-0.586586	-3.53132	8.46717	-0.66451	0.644224	-2.92943	0.314328	-0.08078	9.13676	4.34622	-3.81667	1.56012	3.62253
2.462	5.32713	-0.848904	5.83514	-2.02994	-0.497966	-1.42055	0.284102	-1.65049	-3.34317	-4.05576	1.74076	-6.577	-3.52778	-4.16543	-0.185486	0.342118	-2.95039			2.77357	-0.627858	0.78561	-1.68279	-0.596218	-3.54649	8.4558	-0.660366	0.634704	-2.94547	0.301728	-0.06706	9.13366	4.34273	-3.82441	1.63113	3.59684
2.464	5.31391	-0.838908	5.83128	-2.0309	-0.515802	-1.41144	0.3108	-1.65747	-3.33182	-4.07154	1.73753	-6.55967	-3.56432	-4.15247	-0.19299	0.358078	-2.95968			2.78149	-0.63357	0.78925	-1.69204	-0.58639	-3.58579	8.47235	-0.67403	0.62916	-2.94659	0.29001	-0.028308	9.15152	4.33061	-3.81753	1.69141	3.61565
2.466	5.3132	-0.830466	5.85637	-2.02755	-0.518308	-1.41553	0.32718	-1.6463	-3.31521	-4.04708	1.74628	-6.60687	-3.51553	-4.15485	-0.218862	0.314524	-3.04661			2.79485	-0.623154	0.779128	-1.68427	-0.594538	-3.62449	8.47738	-0.665644	0.599186	-2.94221	0.284172	-0.013146	9.14668	4.3178	-3.83065	1.66757	3.63112
2.468	5.31434	-0.83454	5.88293	-2.02563	-0.519498	-1.44038	0.33439	-1.66062	-3.35496	-4.02787	1.75575	-6.59617	-3.53406	-4.16037	-0.212772	0.313306	-3.06909			2.8002	-0.648564	0.757134	-1.68525	-0.58422	-3.61781	8.50205	-0.680232	0.609574	-2.95442	0.286062	-0.063308	9.14452	4.31402	-3.87814	1.66062	3.65534
2.47	5.34227	-0.81851	5.90653	-2.02059	-0.514122	-1.41401	0.295736	-1.64189	-3.34415	-4.03718	1.75816	-6.60008	-3.57735	-4.16622	-0.210224	0.323988	-3.11			2.80441	-0.61439	0.751786	-1.67889	-0.572852	-3.61528	8.5197	-0.675612	0.624848	-2.98705	0.283724	-0.098154	9.17339	4.33108	-3.86061	1.62397	3.62457
2.472	5.27976	-0.832272	5.91378	-2.01789	-0.536172	-1.45243	0.30506	-1.66723	-3.33263	-4.05366	1.75231	-6.59225	-3.62443	-4.16552	-0.201936	0.34356	-3.12588			2.81256	-0.633248	0.764932	-1.68769	-0.583464	-3.61334	8.52583	-0.686672	0.6265	-2.9708	0.274288	-0.153132	9.17199	4.37168	-3.83603	1.62639	3.57281
2.474	5.26747	-0.833756	5.89996	-2.02321	-0.540078	-1.43431	0.305984	-1.66599	-3.35317	-4.03325	1.74133	-6.56967	-3.63514	-4.17823	-0.203112	0.344302	-3.19235			2.8127	-0.600768	0.79422	-1.71576	-0.563598	-3.60023	8.52236	-0.689696	0.645666	-2.98189	0.273448	-0.168952	9.1751	4.39135	-3.84007	1.66657	3.46751
2.476	5.28948	-0.847574	5.88186	-2.0302	-0.53977	-1.45412	0.267792	-1.6484	-3.36518	-4.0557	1.73589	-6.56453	-3.60912	-4.1845	-0.209818	0.31423	-3.19962			2.83206	-0.638162	0.837564	-1.7288	-0.584304	-3.5905	8.49864	-0.66367	0.670558	-2.9776	0.280728	-0.154196	9.14796	4.40812	-3.87026	1.75651	3.43407
2.478	5.32287	-0.840546	5.85001	-2.02426	-0.52465	-1.43962	0.264166	-1.65056	-3.37179	-4.06231	1.73088	-6.5653	-3.61494	-4.17522	-0.217924	0.331982	-3.15375			2.81117	-0.66178	0.85715	-1.72042	-0.592732	-3.58348	8.5372	-0.67221	0.67788	-2.97808	0.286538	-0.138656	9.13357	4.4158	-3.84822	1.85184	3.47231
2.48	5.32046	-0.858886	5.79902	-2.0174	-0.516418	-1.42733	0.26831	-1.6533	-3.35959	-4.0676	1.73288	-6.55354	-3.60227	-4.16667	-0.23247	0.30639	-3.0526			2.81438	-0.635992	0.847784	-1.70261	-0.575526	-3.58004	8.54405	-0.673162	0.665742	-2.96929	0.29078	-0.114772	9.12411	4.39977	-3.89151	1.90295	3.46688
2.482	5.33483	-0.849338	5.8017	-2.00642	-0.48111	-1.44355	0.290192	-1.66033	-3.36472	-4.06174	1.7396	-6.56863	-3.62383	-4.1552	-0.216818	0.293384	-3.06039			2.82073	-0.647346	0.855218	-1.6933	-0.592634	-3.59386	8.53562	-0.679182	0.644476	-2.97436	0.297794	-0.09898	9.1758	4.38059	-3.87832	1.94174	3.49887
2.484	5.33151	-0.824236	5.81778	-2.02793	-0.503104	-1.42537	0.298382	-1.67223	-3.37205	-4.04569	1.74108	-6.57086	-3.60007	-4.16156	-0.220836	0.251188	-3.14233			2.83403	-0.664258	0.856772	-1.71347	-0.575792	-3.57388	8.55579	-0.703066	0.66066	-3.00016	0.294742	-0.114926	9.17505	4.38371	-3.87349	1.91272	3.53153
2.486	5.31685	-0.818552	5.83423	-2.04242	-0.526386	-1.46409	0.316232	-1.66837	-3.38995	-4.02718	1.74478	-6.57234	-3.65557	-4.16067	-0.21077	0.244678	-3.16873			2.85183	-0.659722	0.845432	-1.70304	-0.60592	-3.57578	8.55509	-0.69286	0.61691	-2.98535	0.274974	-0.167328	9.18036	4.37461	-3.89022	1.87172	3.5105
2.488	5.34393	-0.812224	5.86519	-2.0452	-0.527352	-1.45142	0.31563	-1.64683	-3.39447	-4.05236	1.74964	-6.55791	-3.6959	-4.17243	-0.210602	0.280882	-3.213			2.85744	-0.648788	0.827974	-1.7155	-0.602378	-3.57447	8.55589	-0.674856	0.62895	-3.0088	0.27055	-0.192598	9.17322	4.40614	-3.86558	1.86854	3.44812
2.49	5.35326	-0.81235	5.85679	-2.02527	-0.549234	-1.4932	0.293496	-1.64254	-3.40767	-4.04796	1.76179	-6.55885	-3.70427	-4.18153	-0.214578	0.2877	-3.23833			2.8923	-0.666148	0.82698	-1.72001	-0.578354	-3.57724	8.57741	-0.696318	0.648774	-3.02018	0.251566	-0.230902	9.17253	4.4347	-3.86449	1.89066	3.39713
2.492	5.29004	-0.804146	5.83422	-2.02527	-0.55167	-1.47769	0.29232	-1.66957	-3.39244	-4.05594	1.75533	-6.53143	-3.67308	-4.19208	-0.230496	0.27713	-3.28411			2.89337	-0.607558	0.849254	-1.72172	-0.549738	-3.55599	8.57692	-0.696178	0.64722	-3.00411	0.255696	-0.208544	9.16577	4.44741	-3.86645	1.94831	3.34608
2.494	5.27762	-0.834792	5.82644	-2.01795	-0.538216	-1.46762	0.286286	-1.67381	-3.38012	-4.07583	1.75938	-6.52894	-3.69232	-4.17939	-0.24395	0.251748	-3.28317			2.88026	-0.659078	0.880376	-1.73984	-0.603036	-3.54138	8.59729	-0.681758	0.689654	-3.01438	0.252994	-0.217994	9.14768	4.45421	-3.90765	2.01516	3.33091
2.496	5.28507	-0.828842	5.83442	-2.01471	-0.548954	-1.45139	0.302862	-1.66401	-3.37046	-4.07063	1.75255	-6.5413	-3.68628	-4.18111	-0.232022	0.242634	-3.24401			2.8728	-0.64911	0.902748	-1.74896	-0.593908	-3.52828	8.57773	-0.698964	0.66549	-3.0014	0.254884	-0.188874	9.15132	4.44823	-3.87463	2.07609	3.37611
2.498	5.31878	-0.859264	5.83155	-2.02541	-0.505638	-1.48613	0.25942	-1.66478	-3.39157	-4.06701	1.74899	-6.5371	-3.71685	-4.16767	-0.226324	0.237426	-3.15059			2.87757	-0.66941	0.919366	-1.75234	-0.584822	-3.54166	8.59447	-0.68621	0.6706	-3.00318	0.254184	-0.187698	9.18208	4.4387	-3.8991	2.18359	3.37126
2.5	5.33782	-0.82593	5.7884	-2.02139	-0.517244	-1.46783	0.239246	-1.65207	-3.37446	-4.06648	1.74695	-6.58682	-3.71602	-4.16556	-0.238378	0.23919	-3.1785			2.85981	-0.6902	0.937874	-1.72952	-0.582428	-3.57991	8.63227	-0.685006	0.633206	-3.02284	0.264236	-0.212268	9.17356	4.42609	-3.91096	2.23436	3.38468
2.502	5.34558	-0.830396	5.7919	-2.02637	-0.501536	-1.48429	0.230412	-1.65281	-3.38941	-4.05387	1.74923	-6.5666	-3.7749	-4.17169	-0.213024	0.219016	-3.25185			2.89148	-0.678804	0.922348	-1.71744	-0.593894	-3.59456	8.58976	-0.699888	0.604254	-3.01686	0.263438	-0.239344	9.17167	4.42772	-3.89442	2.21224	3.40957
2.504	5.35226	-0.80766	5.78039	-2.03622	-0.518672	-1.5069	0.258986	-1.6709	-3.41188	-4.06003	1.75083	-6.54035	-3.80856	-4.18401	-0.213864	0.229656	-3.27002			2.88688	-0.678426	0.92106	-1.71552	-0.591262	-3.56133	8.59391	-0.702884	0.662312	-3.00038	0.270018	-0.262402	9.18551	4.45176	-3.90866	2.17435	3.38958
2.506	5.35027	-0.834722	5.80864	-2.03315	-0.540652	-1.49216	0.259294	-1.66905	-3.39076	-4.07287	1.74803	-6.53933	-3.8078	-4.18221	-0.261786	0.251608	-3.34177			2.88459	-0.691754	0.883442	-1.73915	-0.61453	-3.53441	8.6046	-0.702506	0.633794	-3.03594	0.257894	-0.290738	9.17644	4.48381	-3.91061	2.14211	3.31155
2.508	5.35375	-0.819686	5.85126	-2.02062	-0.530908	-1.51046	0.27748	-1.67357	-3.43752	-4.05489	1.75853	-6.52281	-3.75617	-4.19247	-0.277186	0.205646	-3.36454			2.91614	-0.678006	0.917686	-1.76232	-0.595952	-3.539	8.62509	-0.684138	0.668976	-3.02291	0.263172	-0.282128	9.17826	4.50558	-3.91719	2.12857	3.24272
2.51	5.35388	-0.822794	5.84045	-2.00684	-0.533484	-1.50077	0.268884	-1.66834	-3.44539	-4.05579	1.76341	-6.52809	-3.79679	-4.19185	-0.285208	0.18935	-3.35637			2.91172	-0.647374	0.89026	-1.75739	-0.587902	-3.53767	8.64913	-0.680092	0.70686	-3.02462	0.25284	-0.273098	9.16784	4.51825	-3.91217	2.14572	3.19708
2.512	5.32014	-0.852796	5.82222	-1.99895	-0.519918	-1.49538	0.233338	-1.68456	-3.42794	-4.08234	1.76518	-6.52037	-3.76044	-4.19143	-0.26026	0.1813	-3.36672			2.92184	-0.651938	0.923118	-1.74957	-0.579992	-3.53452	8.65402	-0.704802	0.708078	-3.02383	0.240156	-0.245784	9.16842	4.51704	-3.91747	2.21222	3.2206
2.514	5.31763	-0.833518	5.82074	-2.00085	-0.516544	-1.50801	0.251076	-1.67322	-3.39731	-4.07079	1.77019	-6.51651	-3.7658	-4.18603	-0.241318	0.177142	-3.26231			2.94517	-0.687974	0.946064	-1.76712	-0.558656	-3.52937	8.65298	-0.698796	0.701064	-3.03128	0.234808	-0.250544	9.1534	4.49786	-3.9122	2.29935	3.24514
2.516	5.30264	-0.830676	5.81361	-2.0104	-0.521598	-1.52873	0.250908	-1.671	-3.40777	-4.08632	1.77573	-6.52261	-3.77168	-4.17003	-0.240828	0.174034	-3.22071			2.91425	-0.662522	0.986034	-1.76714	-0.598542	-3.53501	8.6672	-0.709506	0.710752	-3.04553	0.22974	-0.270088	9.17769	4.48504	-3.90011	2.39175	3.22351
2.518	5.34212	-0.845656	5.79492	-2.02016	-0.535304	-1.50819	0.226366	-1.67252	-3.40579	-4.08216	1.76082	-6.54459	-3.81994	-4.17728	-0.241052	0.16849	-3.31345			2.91388	-0.676648	1.01479	-1.76616	-0.59731	-3.53416	8.64542	-0.706902	0.676522	-3.02156	0.231546	-0.312858	9.16847	4.4864	-3.9311	2.45435	3.28075
2.52	5.35329	-0.832034	5.77816	-2.03157	-0.56462	-1.49548	0.22043	-1.68358	-3.41876	-4.06857	1.76821	-6.52677	-3.86253	-4.18124	-0.293496	0.174734	-3.32955			2.92884	-0.69181	0.986916	-1.76126	-0.566104	-3.58429	8.6626	-0.689234	0.627046	-3.04769	0.215068	-0.350042	9.18057	4.50768	-3.91741	2.45398	3.28037
2.522	5.33707	-0.829948	5.78656	-2.01537	-0.557312	-1.51028	0.189672	-1.67143	-3.43742	-4.07401	1.76427	-6.52555	-3.87183	-4.1861	-0.292236	0.213822	-3.36129			2.93118	-0.690298	0.986426	-1.75479	-0.591948	-3.58148	8.68071	-0.69804	0.654542	-3.03366	0.230272	-0.370734	9.18407	4.52943	-3.92798	2.42053	3.25602
2.524	5.36311	-0.8309	5.80422	-2.00274	-0.529816	-1.55281	0.215726	-1.6598	-3.44473	-4.06538	1.75811	-6.52456	-3.84208	-4.19999	-0.25403	0.22057	-3.38176			2.95431	-0.68544	0.971824	-1.75517	-0.57694	-3.55621	8.67098	-0.698684	0.640598	-3.05729	0.241094	-0.373016	9.15293	4.54488	-3.89705	2.38004	3.15311
2.526	5.37986	-0.818832	5.82383	-1.99279	-0.525294	-1.54238	0.236992	-1.67012	-3.47376	-4.06666	1.75469	-6.50499	-3.84829	-4.20991	-0.250754	0.141918	-3.44704			2.93304	-0.680904	0.988414	-1.76799	-0.591304	-3.51203	8.67401	-0.73206	0.656866	-3.03867	0.23898	-0.35266	9.15256	4.55876	-3.9527	2.40981	3.07208
2.528	5.37544	-0.847098	5.82569	-2.00382	-0.527408	-1.52034	0.222292	-1.69056	-3.4397	-4.09916	1.75409	-6.50587	-3.84426	-4.19955	-0.248388	0.07329	-3.41932			2.96171	-0.662578	0.978796	-1.78844	-0.607936	-3.51719	8.66046	-0.725256	0.694316	-3.04825	0.245616	-0.308924	9.13241	4.5704	-3.92606	2.40019	3.01211
2.53	5.39372	-0.850374	5.80168	-2.00964	-0.505764	-1.53441	0.205604	-1.67297	-3.45464	-4.09962	1.7613	-6.48763	-3.82941	-4.19548	-0.262066	0.115248	-3.41788			2.96705	-0.658084	0.988274	-1.78207	-0.599802	-3.55328	8.67444	-0.718928	0.694806	-3.04424	0.246974	-0.314244	9.17553	4.5592	-3.97877	2.44343	3.0931
2.532	5.373	-0.865536	5.80083	-2.00668	-0.498162	-1.52775	0.21602	-1.65648	-3.45087	-4.09101	1.76827	-6.52694	-3.84009	-4.18347	-0.276836	0.144242	-3.29256			2.97291	-0.681422	1.00104	-1.77765	-0.584808	-3.57428	8.7087	-0.703934	0.692454	-3.05501	0.235578	-0.319634	9.17764	4.54439	-3.94593	2.502	3.13229
2.534	5.37331	-0.854098	5.80164	-2.01901	-0.523698	-1.5428	0.207004	-1.68241	-3.42416	-4.10049	1.76677	-6.50038	-3.90011	-4.18824	-0.284564	0.223384	-3.2759			2.98011	-0.669746	1.03526	-1.77331	-0.597576	-3.58982	8.71853	-0.715386	0.653296	-3.05361	0.220108	-0.344596	9.19821	4.53237	-3.96402	2.52701	3.108
2.536	5.36206	-0.836164	5.78399	-2.02751	-0.542836	-1.54966	0.23492	-1.66953	-3.43888	-4.09441	1.7717	-6.50873	-3.94892	-4.1862	-0.29099	0.23009	-3.39515			2.98444	-0.690774	1.04087	-1.7779	-0.60543	-3.58064	8.72486	-0.730646	0.688226	-3.05886	0.212982	-0.390838	9.21304	4.52886	-3.95291	2.56617	3.15717
2.538	5.39858	-0.820358	5.75289	-2.01635	-0.54789	-1.55582	0.230328	-1.67264	-3.44063	-4.04855	1.77478	-6.48837	-3.96938	-4.19632	-0.27944	0.182056	-3.42622			2.97938	-0.668542	1.04293	-1.78263	-0.607376	-3.57343	8.74906	-0.713076	0.64736	-3.09917	0.201628	-0.432936	9.18015	4.55678	-3.91649	2.61254	3.12536
2.54	5.37393	-0.824026	5.74389	-1.99878	-0.552258	-1.5722	0.225764	-1.65621	-3.46443	-4.06547	1.77678	-6.50188	-3.95105	-4.20567	-0.27328	0.12243	-3.45157			2.97004	-0.675654	1.04324	-1.78016	-0.604142	-3.55277	8.74327	-0.710332	0.660884	-3.04912	0.204876	-0.4186	9.18242	4.58326	-3.9563	2.60203	3.08258
2.542	5.40334	-0.79779	5.7589	-1.99958	-0.560406	-1.56983	0.184912	-1.68027	-3.47087	-4.07362	1.77218	-6.48886	-3.94318	-4.20965	-0.27727	0.082124	-3.45603			2.97013	-0.664006	1.02528	-1.79085	-0.56546	-3.54768	8.76294	-0.706944	0.641382	-3.07755	0.199808	-0.412986	9.16187	4.60481	-3.96796	2.58016	2.99907
2.544	5.3947	-0.789292	5.75513	-2.00423	-0.551292	-1.59327	0.172354	-1.69121	-3.50105	-4.08285	1.77271	-6.47331	-3.91229	-4.21707	-0.285572	0.065002	-3.50154			2.98159	-0.671132	1.00796	-1.78528	-0.5586	-3.57449	8.74304	-0.727146	0.685258	-3.06277	0.208446	-0.375214	9.14215	4.61525	-3.95668	2.5514	2.9206
2.546	5.41339	-0.765604	5.78428	-2.00511	-0.534184	-1.57066	0.18837	-1.68868	-3.46863	-4.09118	1.7653	-6.49188	-3.93127	-4.21142	-0.287938	0.111188	-3.5189			2.97009	-0.651966	1.02851	-1.80671	-0.57547	-3.5706	8.73821	-0.746242	0.69153	-3.07185	0.210728	-0.36449	9.17021	4.61889	-3.98857	2.60306	2.87837
2.548	5.44768	-0.803838	5.81307	-2.00833	-0.530278	-1.55774	0.233464	-1.70243	-3.47698	-4.10941	1.76093	-6.51941	-3.94533	-4.20605	-0.275226	0.18676	-3.51037			3.0021	-0.69265	1.03037	-1.80922	-0.601216	-3.55799	8.74629	-0.74879	0.704746	-3.0837	0.211036	-0.391412	9.18757	4.6032	-3.97417	2.61297	2.96283
2.55	5.43729	-0.82894	5.78449	-2.01393	-0.529578	-1.54448	0.240184	-1.66314	-3.4441	-4.10442	1.7638	-6.52131	-3.98864	-4.18811	-0.28826	0.16751	-3.39945			2.99468	-0.720286	1.05265	-1.79347	-0.591248	-3.55153	8.7519	-0.71316	0.69524	-3.07709	0.216356	-0.439642	9.20602	4.60135	-3.98579	2.6976	2.95624
[truncated: 2,829 more rows]
