# Supplementary material for: Strong confinement of active microalgae leads to inversion of vortex flow and enhanced mixing
Source: eLife. 2021 Nov 22;10:e67663. doi: 10.7554/eLife.67663 (PMC8758135; doi:10.7554/eLife.67663)
Supplement: Figure 2—source data 4. [file elife-67663-fig2-data4.xlsx]

## Sheet: Sheet1
Figure 2G: Cell speed and trajectory tortuosity as a function of degree of confinement
We have considered only those datasets which are captured at 500 frames/s through 40X objective.
H30 cells: Number of cells/trajectories considered for this plot (N) = 52
H10 Wobbler: N = 35
H10 Synchronous: N = 23 (Only considered those cells whose mean speed > 1 micron/s i.e. excluded cells that are almost static due to their bigger cell size in strong confinement)
*In the following dataset, D denotes cell-body diameter, u denotes cell speed, Std denotes standard deviation due to heterogeneous population of cells
		H30				H10 Wobbler				H10 Synchronous
		D (micron)	u (micron/s)	Tortuosity		D (micron)	u (micron/s)	Tortuosity		D (micron)	u (micron/s)	Tortuosity
Mean		10.34	122.14	1.91		9.95	36.75	3.24		11.96	4.07	5.91
Std		1.38	31.59	0.19		0.84	14.97	1.15		0.78	2.88	2.48
D/H		0.345 ± 0.046				0.995 ± 0.084				1.196 ± 0.078
Cell index
1		9.73	98.07	2.16441		10.7	31.42	2.34575		12.4	3.07	5.003
2		11.24	95.75	2.29491		10.45	44.81	3.90238		11.27	1.41	11.9407
3		10.76	84.89	2.02233		9.93	33	2.94877		12.31	3.44	5.15377
4		10.66	76.04	2.05769		8.33	44.14	2.3917		12.44	1.21	7.32271
5		9.23	170.07	1.98149		8.88	61.12	3.80999		12.22	2.27	7.12374
6		9.95	52.96	2.36863		10.81	41.23	1.92381		12.28	3.7	4.33321
7		12.43	128.67	1.68294		10.62	37.27	3.79597		11.81	4.33	6.93871
8		13.19	121.78	1.78851		10.06	42.3	4.29795		11.96	5.67	3.41491
9		9.96	133.56	1.93085		10.09	45.79	4.71819		11.2	8.44	3.41391
10		10.87	121.45	1.90479		8.3	38.59	2.83438		11.48	6.7	3.32343
11		10.05	121.53	1.95111		8.9	37.41	3.17313		11.77	3.77	5.95111
12		9.18	170.54	1.99358		9.87	61.35	2.408		11.69	2.78	5.40894
13		10.93	131.26	1.81005		9.97	64.58	2.57602		11.95	3.97	4.25977
14		11.9	115.12	1.63245		10.8	38.92	5.12629		12.43	1.08	10.8359
15		9.23	149.37	1.80609		9.76	66.31	2.29883		13.93	1.55	7.77164
16		11.01	124.93	1.84817		9.91	19.27	4.47128		11.61	2.19	5.43723
17		11.82	149.98	1.75548		9.69	22.14	3.37287		12.84	1.06	10.6687
18		11.34	130.56	1.9813		10.87	10.61	4.33384		11.11	4.24	4.12219
19		10.74	131.48	1.818		12.36	31.65	2.5775		10.95	5.12	3.75824
20		11.28	150.74	1.68251		10.43	35.9	3.34047		13.44	3.98	2.69353
21		12.09	96.16	2.08367		9.55	11.96	4.17994		12.31	2.01	7.59628
22		8.64	129.6	1.78612		9.56	8.2	6.84406		11.17	13.7	4.82692
23		11.18	140.93	1.66225		8.87	69.28	2.48117		10.51	7.82	4.60855
24		9.74	133.47	1.69239		8.33	24.16	3.27303
25		12.72	120.53	1.62729		10.65	21.39	2.54242
26		8.76	119.92	1.93663		9.91	41.68	5.99904
27		9.59	107.96	1.92647		10.81	33.26	2.22804
28		11.34	50.11	2.35934		10.45	26.53	1.94103
29		10.53	120.36	1.76728		10.52	26.16	2.04186
30		9.97	124.4	1.92546		9.12	42.55	2.73575
31		9.28	108.53	1.78775		10.3	22.55	2.74711
32		10.33	116.42	1.87479		9.36	39.34	2.23385
33		11.46	137.34	1.80117		10.33	44.73	2.27097
34		10.3	128.35	1.86507		9.48	31.86	2.35129
35		9.88	124.92	1.81632		10.33	34.92	3.04266
36		9	126.42	1.76275
37		10.55	43.57	2.20898
38		9.24	130.4	1.91296
39		9.73	118.61	1.85417
40		11.65	103	1.68536
41		13.86	102.6	1.69675
42		11.86	77.22	1.92022
43		8.24	152.56	2.40704
44		10.39	133.62	1.77893
45		8.04	134.62	1.80029
46		10.98	148.32	1.82661
47		8.89	190.57	2.1367
48		7.88	183.78	2.01714
49		11.31	158.68	1.68511
50		8.96	99.79	1.7626
51		7.92	58.45	2.18105
52		7.62	171.58	2.13202
