# Supplementary material for: Strong confinement of active microalgae leads to inversion of vortex flow and enhanced mixing
Source: eLife. 2021 Nov 22;10:e67663. doi: 10.7554/eLife.67663 (PMC8758135; doi:10.7554/eLife.67663)
Supplement: Figure 3—source data 1. [file elife-67663-fig3-data1.xlsx]

## Sheet: Sheet1
Figure 3A: Experimental flow field of weakly confined cells (H30)
Beat averaged flow field from 32 H30 cells, averaged over approximately 178 beat cycles.
The [X,Y] meshgrid for flow-field plots ranges from -33 to 37 micron in X and -37 to 36 micron in Y. Gridsize is 1 micron. i.e. [X,Y] = meshgrid [-33:1:37,-37:1:36] micron.
Cell centre is at the origin of this meshgrid i.e. at [0,0].
All velocities in the following datasets are in micron/s
X-component of velocity field (v_x) for H30
Y↓ & X→	-33	-32	-31	-30	-29	-28	-27	-26	-25	-24	-23	-22	-21	-20	-19	-18	-17	-16	-15	-14	-13	-12	-11	-10	-9	-8	-7	-6	-5	-4	-3	-2	-1	0	1	2	3	4	5	6	7	8	9	10	11	12	13	14	15
-37	-0.0101135	-0.0787507	-0.212618	-0.335038	-0.369333	-0.239998	0.0210931	0.189932	0.099045	-0.14765	-0.399065	-0.600178	-0.740439	-0.834469	-0.918184	-1.02503	-1.18335	-1.40559	-1.65542	-1.8855	-2.03917	-2.0608	-1.96648	-1.82737	-1.70867	-1.66494	-1.72123	-1.82232	-1.9025	-1.91617	-1.83444	-1.75083	-1.83914	-2.10227	-2.31915	-2.34468	-2.26108	-2.16462	-2.04548	-1.8659	-1.65134	-1.46495	-1.3161	-1.15077	-0.937897	-0.705665	-0.48286	-0.26475	-0.0435339
-36	-0.0594665	-0.0659853	-0.146188	-0.24578	-0.31047	-0.286712	-0.189448	-0.156163	-0.289875	-0.526141	-0.768711	-0.960635	-1.06684	-1.12764	-1.24635	-1.43927	-1.57965	-1.59116	-1.597	-1.7274	-1.90298	-1.96975	-1.91263	-1.82273	-1.74456	-1.65152	-1.53953	-1.4831	-1.54137	-1.60614	-1.52536	-1.34993	-1.26808	-1.34279	-1.47069	-1.56532	-1.6101	-1.5993	-1.52779	-1.39468	-1.24459	-1.14797	-1.09942	-1.00459	-0.817303	-0.610189	-0.450708	-0.310525	-0.141599
-35	-0.040937	-0.0316119	-0.090445	-0.176058	-0.247072	-0.262644	-0.230953	-0.24789	-0.389676	-0.63042	-0.917944	-1.17313	-1.31214	-1.38076	-1.53356	-1.78903	-1.94144	-1.87049	-1.78883	-1.92259	-2.15967	-2.26605	-2.20827	-2.10621	-2.01454	-1.88812	-1.71908	-1.62588	-1.70675	-1.81725	-1.74578	-1.52968	-1.37595	-1.38392	-1.50854	-1.68387	-1.81591	-1.82645	-1.73946	-1.61039	-1.48356	-1.39484	-1.33186	-1.22607	-1.04288	-0.830682	-0.637643	-0.460496	-0.282442
-34	0.00182582	-0.00403264	-0.0620546	-0.138598	-0.20002	-0.213135	-0.1864	-0.202794	-0.334591	-0.588643	-0.945307	-1.29632	-1.50374	-1.60645	-1.79217	-2.09101	-2.272	-2.20228	-2.13227	-2.32514	-2.63689	-2.7771	-2.70329	-2.56264	-2.43437	-2.29247	-2.1401	-2.08522	-2.21144	-2.35769	-2.29671	-2.07235	-1.91329	-1.93567	-2.10446	-2.3471	-2.52239	-2.5133	-2.37945	-2.22975	-2.09791	-1.97079	-1.83385	-1.67179	-1.47283	-1.23328	-0.958285	-0.688075	-0.465204
-33	0.0251727	-0.0116493	-0.0776807	-0.146128	-0.190198	-0.183524	-0.138766	-0.138417	-0.258848	-0.528967	-0.949345	-1.38886	-1.66907	-1.8173	-2.03454	-2.3619	-2.57462	-2.54524	-2.52869	-2.78915	-3.16226	-3.33031	-3.24759	-3.07685	-2.91979	-2.78231	-2.68281	-2.6957	-2.86825	-3.03563	-2.97916	-2.76023	-2.63067	-2.70801	-2.93024	-3.2018	-3.3734	-3.32711	-3.1467	-2.96954	-2.81735	-2.64102	-2.42581	-2.19833	-1.96536	-1.68413	-1.32725	-0.966671	-0.689029
-32	-0.0145455	-0.082864	-0.153987	-0.211375	-0.238486	-0.21915	-0.171026	-0.172306	-0.296677	-0.579546	-1.0286	-1.50942	-1.83556	-2.02595	-2.27302	-2.61842	-2.85257	-2.85806	-2.87944	-3.16871	-3.56345	-3.75306	-3.69107	-3.53364	-3.38655	-3.27541	-3.22743	-3.29189	-3.48997	-3.65926	-3.59415	-3.37559	-3.27863	-3.41095	-3.65764	-3.89474	-4.01281	-3.93513	-3.74016	-3.54648	-3.37154	-3.17076	-2.92817	-2.66229	-2.37864	-2.04937	-1.65916	-1.2697	-0.95306
-31	-0.147702	-0.234828	-0.297641	-0.337078	-0.354078	-0.349789	-0.344763	-0.394261	-0.54954	-0.834849	-1.25342	-1.69735	-2.0185	-2.23643	-2.51218	-2.86949	-3.10422	-3.10254	-3.10004	-3.34305	-3.70055	-3.90522	-3.90953	-3.83448	-3.75928	-3.69655	-3.66725	-3.73036	-3.91803	-4.06998	-3.98065	-3.74394	-3.65581	-3.80733	-4.01801	-4.14085	-4.15767	-4.07475	-3.92199	-3.73603	-3.54491	-3.37003	-3.19183	-2.94318	-2.59702	-2.22182	-1.88223	-1.56755	-1.24769
-30	-0.299993	-0.395994	-0.436486	-0.447234	-0.454002	-0.482495	-0.552871	-0.675361	-0.860525	-1.12373	-1.47176	-1.83991	-2.13776	-2.38532	-2.69533	-3.06287	-3.28917	-3.26489	-3.21758	-3.38968	-3.68947	-3.90273	-3.98292	-4.01202	-4.03271	-4.02611	-3.99867	-4.04117	-4.2194	-4.37111	-4.27712	-4.0316	-3.93982	-4.07663	-4.21224	-4.19231	-4.10202	-4.03631	-3.95276	-3.77633	-3.55352	-3.40219	-3.30804	-3.10133	-2.71081	-2.30469	-2.03178	-1.80692	-1.4943
-29	-0.352012	-0.457192	-0.465832	-0.434117	-0.418229	-0.473919	-0.617427	-0.794289	-0.964502	-1.16541	-1.44163	-1.76479	-2.07735	-2.38423	-2.74255	-3.1227	-3.35298	-3.34449	-3.3096	-3.47332	-3.75774	-3.97372	-4.08239	-4.15978	-4.23655	-4.27364	-4.26827	-4.33468	-4.56229	-4.78065	-4.75127	-4.55156	-4.47189	-4.57941	-4.64581	-4.53485	-4.38965	-4.3486	-4.30753	-4.10521	-3.80105	-3.58613	-3.47602	-3.27919	-2.90171	-2.49385	-2.19312	-1.9304	-1.59096
-28	-0.270504	-0.393788	-0.37338	-0.297291	-0.25353	-0.329273	-0.535243	-0.745365	-0.868788	-0.990058	-1.21684	-1.54032	-1.90165	-2.27977	-2.68535	-3.07627	-3.32398	-3.37089	-3.40759	-3.62973	-3.94856	-4.1724	-4.27278	-4.34594	-4.43529	-4.50327	-4.54801	-4.68548	-5.0061	-5.33578	-5.42882	-5.33147	-5.28752	-5.36168	-5.38097	-5.25073	-5.11164	-5.08897	-5.04566	-4.78472	-4.36792	-4.01303	-3.78167	-3.55021	-3.23258	-2.84998	-2.4364	-2.01817	-1.61526
-27	-0.100243	-0.257557	-0.230105	-0.132786	-0.0805012	-0.186991	-0.459729	-0.716048	-0.824569	-0.905961	-1.11533	-1.44931	-1.83563	-2.23882	-2.65464	-3.04298	-3.30441	-3.40046	-3.50159	-3.7788	-4.13952	-4.39642	-4.52292	-4.61538	-4.72395	-4.82744	-4.93191	-5.13529	-5.51222	-5.91137	-6.11831	-6.14293	-6.14768	-6.18714	-6.17175	-6.05962	-5.95195	-5.92907	-5.85328	-5.53945	-5.04372	-4.56886	-4.20841	-3.92539	-3.65896	-3.31161	-2.81709	-2.27253	-1.80462
-26	0.0994425	-0.105082	-0.0979581	-0.0105113	0.0259311	-0.118637	-0.453316	-0.77087	-0.91931	-1.02238	-1.24236	-1.57446	-1.94166	-2.31325	-2.69782	-3.0678	-3.33555	-3.46572	-3.60485	-3.90151	-4.28484	-4.60385	-4.82303	-4.99552	-5.1559	-5.30865	-5.47263	-5.71351	-6.07948	-6.47147	-6.74729	-6.88582	-6.94893	-6.96707	-6.9277	-6.83679	-6.75368	-6.71497	-6.5995	-6.25437	-5.72891	-5.196	-4.75579	-4.42096	-4.15571	-3.82714	-3.33208	-2.76066	-2.24281
-25	0.249287	0.00354415	-0.0185329	0.0497755	0.0751886	-0.0743062	-0.414669	-0.7542	-0.948065	-1.09421	-1.32648	-1.64613	-1.99678	-2.35274	-2.71455	-3.06389	-3.35088	-3.55713	-3.77252	-4.08946	-4.47873	-4.86465	-5.20537	-5.48565	-5.71205	-5.92168	-6.15141	-6.43058	-6.77615	-7.14113	-7.45825	-7.69312	-7.83432	-7.88012	-7.84082	-7.74339	-7.65449	-7.6131	-7.48635	-7.1069	-6.52962	-5.9449	-5.4568	-5.06582	-4.73696	-4.36902	-3.8798	-3.31311	-2.74324
-24	0.295514	0.0315112	-0.0111745	0.0472953	0.0867592	-0.0119348	-0.275523	-0.565381	-0.771393	-0.945525	-1.16812	-1.46369	-1.82997	-2.23404	-2.61738	-2.95739	-3.29046	-3.6456	-4.01168	-4.37539	-4.76034	-5.20024	-5.65858	-6.04606	-6.33864	-6.60851	-6.91418	-7.25495	-7.61876	-7.98775	-8.34154	-8.65415	-8.89561	-9.0315	-9.02177	-8.87904	-8.74842	-8.73584	-8.64418	-8.21103	-7.51534	-6.84325	-6.31624	-5.85947	-5.40369	-4.9169	-4.37682	-3.78239	-3.14408
-23	0.276016	0.0209856	-0.0274384	0.0284777	0.0864673	0.0449879	-0.131228	-0.358859	-0.563549	-0.746438	-0.930051	-1.17126	-1.53652	-1.99	-2.40968	-2.76045	-3.15126	-3.65017	-4.15526	-4.55945	-4.93928	-5.43347	-6.01177	-6.51579	-6.88956	-7.22971	-7.61208	-8.02072	-8.4283	-8.83382	-9.24357	-9.6367	-9.97312	-10.1942	-10.2177	-10.0449	-9.8884	-9.91104	-9.85603	-9.37408	-8.56657	-7.80764	-7.23382	-6.69898	-6.10018	-5.46659	-4.83209	-4.17103	-3.4537
-22	0.245932	0.0268345	-0.0097253	0.0457754	0.10286	0.0716429	-0.0836184	-0.301786	-0.518587	-0.694321	-0.809247	-0.950902	-1.24674	-1.68043	-2.114	-2.49961	-2.94057	-3.49523	-4.03721	-4.44126	-4.82592	-5.39152	-6.10273	-6.74524	-7.2306	-7.65887	-8.11156	-8.57701	-9.03433	-9.50242	-10.0088	-10.5092	-10.9099	-11.1443	-11.1814	-11.0528	-10.9399	-10.9729	-10.9031	-10.4008	-9.5666	-8.76214	-8.11767	-7.48872	-6.77739	-6.02443	-5.27539	-4.51272	-3.71416
-21	0.247275	0.0776774	0.0649281	0.125081	0.174191	0.128875	-0.0427079	-0.280173	-0.51379	-0.674631	-0.715516	-0.748639	-0.948359	-1.32604	-1.75453	-2.17662	-2.6547	-3.2171	-3.75092	-4.15335	-4.56801	-5.21911	-6.06009	-6.83873	-7.44418	-7.97739	-8.52269	-9.07151	-9.60881	-10.1754	-10.8215	-11.4646	-11.9324	-12.1611	-12.2293	-12.2203	-12.2051	-12.2116	-12.0575	-11.5214	-10.6916	-9.84356	-9.08652	-8.33212	-7.515	-6.64606	-5.74682	-4.8399	-3.95496
-20	0.313771	0.190362	0.204476	0.279533	0.338953	0.306652	0.151933	-0.0746911	-0.307358	-0.455667	-0.450603	-0.421406	-0.575544	-0.933667	-1.35757	-1.78567	-2.28772	-2.89623	-3.48903	-3.95363	-4.43844	-5.17718	-6.11813	-6.99293	-7.69188	-8.34249	-9.04293	-9.75735	-10.4438	-11.1594	-11.9822	-12.8055	-13.3991	-13.7025	-13.8791	-14.0406	-14.1331	-14.0743	-13.7657	-13.1196	-12.2221	-11.2641	-10.3354	-9.40517	-8.43773	-7.40186	-6.28839	-5.18491	-4.20164
-19	0.434905	0.371139	0.41139	0.497885	0.572853	0.578817	0.485487	0.311219	0.0977331	-0.0482656	-0.0363176	-0.00252186	-0.172199	-0.554069	-0.973068	-1.36841	-1.87242	-2.56029	-3.27212	-3.84732	-4.42129	-5.2292	-6.22663	-7.15717	-7.93225	-8.71359	-9.6129	-10.547	-11.4267	-12.3223	-13.3441	-14.3819	-15.1778	-15.6658	-16.0327	-16.3818	-16.5652	-16.4239	-15.9388	-15.1407	-14.1188	-12.9973	-11.8505	-10.694	-9.51778	-8.26247	-6.90153	-5.58647	-4.50264
-18	0.564704	0.61732	0.683448	0.749471	0.801773	0.826654	0.802802	0.695281	0.501975	0.342241	0.329493	0.334199	0.131204	-0.271441	-0.668219	-1.00333	-1.47179	-2.19366	-2.98161	-3.63583	-4.26841	-5.10001	-6.1075	-7.0828	-7.96112	-8.89137	-9.96707	-11.0797	-12.1203	-13.18	-14.4016	-15.6797	-16.7409	-17.4954	-18.095	-18.6078	-18.8521	-18.652	-18.0549	-17.1752	-16.0832	-14.8224	-13.4483	-12.031	-10.6041	-9.11804	-7.55445	-6.08733	-4.92346
-17	0.68025	0.904631	1.00187	1.02195	1.01481	1.02985	1.06377	1.01897	0.84024	0.657427	0.607542	0.577257	0.354144	-0.0438272	-0.403801	-0.675385	-1.07932	-1.75879	-2.53547	-3.21082	-3.86593	-4.68207	-5.66513	-6.68743	-7.70245	-8.78578	-9.97583	-11.18	-12.3167	-13.4973	-14.8824	-16.3784	-17.7192	-18.78	-19.6233	-20.2596	-20.538	-20.3274	-19.7231	-18.8805	-17.8252	-16.5045	-14.947	-13.2768	-11.5865	-9.88454	-8.19505	-6.66207	-5.44599
-16	0.795311	1.17632	1.32288	1.33171	1.2995	1.322	1.40964	1.4201	1.26069	1.07115	1.00776	0.968509	0.748255	0.364309	0.0222398	-0.225348	-0.581386	-1.18667	-1.91348	-2.61037	-3.31463	-4.13359	-5.09187	-6.15052	-7.28248	-8.48018	-9.72564	-10.9675	-12.1713	-13.4341	-14.8852	-16.4688	-18.0019	-19.347	-20.4289	-21.1712	-21.4838	-21.3098	-20.7713	-20.0318	-19.079	-17.7953	-16.1744	-14.3415	-12.4215	-10.5207	-8.74174	-7.18128	-5.92392
-15	0.925022	1.39235	1.60921	1.67775	1.7001	1.77738	1.91968	1.97413	1.84173	1.67471	1.64362	1.64295	1.45605	1.08799	0.731856	0.453776	0.106112	-0.427228	-1.10214	-1.85092	-2.65727	-3.52653	-4.48022	-5.55155	-6.73753	-7.98242	-9.24039	-10.5049	-11.7812	-13.1023	-14.5089	-16.0101	-17.5909	-19.1409	-20.4269	-21.2665	-21.6251	-21.5143	-21.0668	-20.4373	-19.6044	-18.4395	-16.8987	-15.0388	-12.9705	-10.9107	-9.06034	-7.48263	-6.1963
-14	1.07942	1.5705	1.84921	2.00008	2.10763	2.25549	2.44362	2.52232	2.40128	2.25621	2.27984	2.35481	2.23788	1.91527	1.56835	1.27787	0.952759	0.50536	-0.0924617	-0.848142	-1.71054	-2.61019	-3.55419	-4.60761	-5.78628	-7.03273	-8.30402	-9.61395	-10.9787	-12.3719	-13.7584	-15.1867	-16.7587	-18.3944	-19.7765	-20.6629	-21.0397	-20.9488	-20.5389	-19.9749	-19.2309	-18.1644	-16.7078	-14.8834	-12.7932	-10.7055	-8.86758	-7.33207	-6.0906
-13	1.26855	1.73952	2.04253	2.24398	2.41025	2.60688	2.82074	2.89796	2.75403	2.6024	2.67405	2.84157	2.83067	2.60886	2.34962	2.13808	1.90673	1.58192	1.11409	0.470145	-0.306442	-1.14586	-2.04291	-3.04172	-4.16286	-5.39111	-6.70985	-8.1064	-9.5663	-11.0609	-12.5601	-14.0832	-15.6795	-17.2649	-18.5812	-19.4232	-19.748	-19.5719	-19.0865	-18.5141	-17.804	-16.7403	-15.2556	-13.4591	-11.4983	-9.58373	-7.90593	-6.52853	-5.46686
-12	1.50839	1.92979	2.22898	2.45372	2.65179	2.87018	3.08591	3.15069	2.98968	2.83464	2.93505	3.16872	3.26027	3.16882	3.0533	2.99048	2.9147	2.75406	2.45738	1.98768	1.37358	0.667055	-0.123428	-1.02291	-2.05525	-3.24135	-4.57978	-6.00721	-7.46046	-8.93917	-10.4636	-12.0306	-13.6188	-15.1225	-16.3267	-17.0567	-17.2566	-16.9368	-16.3505	-15.7942	-15.1867	-14.219	-12.8027	-11.1113	-9.33284	-7.65549	-6.24351	-5.15414	-4.39752
-11	1.81466	2.17095	2.46187	2.70837	2.93144	3.15156	3.34464	3.40687	3.29199	3.18739	3.29316	3.52055	3.66154	3.68739	3.72208	3.82265	3.93073	3.97327	3.86381	3.53303	3.0403	2.48951	1.88016	1.13199	0.200362	-0.904973	-2.14677	-3.42259	-4.63679	-5.79809	-6.95554	-8.19779	-9.63517	-11.1558	-12.3586	-12.9523	-12.9682	-12.5259	-11.9424	-11.5583	-11.2814	-10.7554	-9.79248	-8.40705	-6.73767	-5.17449	-4.06218	-3.3869	-3.02528
-10	2.16907	2.47322	2.77116	3.05094	3.30063	3.50825	3.65738	3.72366	3.70869	3.70909	3.82343	4.00926	4.16638	4.29151	4.46378	4.71884	5.0183	5.29059	5.38078	5.15664	4.74045	4.34174	3.95146	3.3941	2.59044	1.60661	0.538142	-0.46868	-1.28878	-1.96987	-2.62708	-3.44986	-4.66983	-6.15796	-7.316	-7.73122	-7.5329	-6.9632	-6.41539	-6.28387	-6.44509	-6.45763	-6.01971	-4.99955	-3.50025	-2.12759	-1.41357	-1.25064	-1.355
-9	2.52825	2.83113	3.16767	3.49593	3.77397	3.96027	4.05057	4.10732	4.1887	4.31324	4.48732	4.69248	4.90158	5.13034	5.43084	5.83098	6.31789	6.82677	7.14065	7.06638	6.76033	6.50062	6.29393	5.93965	5.33042	4.50128	3.55137	2.72844	2.23076	1.82372	1.14306	0.142452	-1.00292	-2.06734	-2.76539	-2.89841	-2.4945	-1.69034	-0.997964	-0.974833	-1.36193	-1.40731	-0.828976	0.0963617	1.04928	1.68586	1.74342	1.34088	0.706673
-8	2.83628	3.17156	3.57078	3.96524	4.28624	4.46588	4.50941	4.55301	4.70862	4.95408	5.24119	5.54914	5.87085	6.22514	6.65279	7.18606	7.84231	8.57299	9.12599	9.26631	9.13064	8.9896	8.89159	8.71384	8.33964	7.66756	6.72845	5.92075	5.55793	5.09756	3.77778	1.93808	0.662952	0.349462	0.48243	0.726445	1.34762	2.53546	3.61925	3.77314	3.4768	3.98588	5.42559	6.58701	6.69915	6.13746	5.34379	4.35966	3.1418
-7	3.02097	3.32937	3.77537	4.25495	4.66411	4.89996	4.96362	5.04221	5.28597	5.64572	6.03791	6.45198	6.90945	7.42119	7.98923	8.63774	9.42703	10.3409	11.1116	11.4765	11.5246	11.477	11.4211	11.3391	11.125	10.55	9.57127	8.69376	8.31882	7.70309	5.82255	3.29125	1.82711	1.96617	2.6808	3.29031	4.24214	5.92027	7.50369	7.94037	7.85456	8.86263	10.9942	12.4086	12.0166	10.6425	9.17435	7.61786	5.77696
-6	3.0412	3.22227	3.67626	4.25189	4.79786	5.16432	5.33161	5.51306	5.87634	6.34128	6.79265	7.26226	7.8425	8.53253	9.25266	9.99662	10.8801	11.9337	12.8852	13.4516	13.667	13.6889	13.6232	13.5329	13.3418	12.7745	11.7519	10.7883	10.3047	9.59394	7.66749	5.09752	3.50973	3.47854	4.18555	5.07993	6.51196	8.73735	10.8258	11.6283	11.741	12.7969	14.9036	16.3688	16.137	14.803	13.0503	10.9585	8.47912
-5	2.94129	3.00479	3.45659	4.10713	4.76687	5.24792	5.51253	5.79162	6.26354	6.82096	7.32145	7.83111	8.5006	9.32413	10.1635	10.9924	11.971	13.1676	14.3083	15.0927	15.4881	15.5719	15.4667	15.3265	15.1169	14.5309	13.4565	12.3877	11.746	10.9299	9.07709	6.6573	5.04216	4.79775	5.42035	6.56712	8.47601	11.2536	13.8837	15.149	15.5458	16.595	18.5024	19.9193	19.9329	18.8015	16.8906	14.3371	11.2517
-4	2.77754	2.84376	3.31394	3.9901	4.67426	5.17023	5.44332	5.74792	6.27905	6.91469	7.49194	8.06543	8.77932	9.63812	10.5282	11.4427	12.5525	13.9328	15.3059	16.3563	16.97	17.1255	16.9782	16.8141	16.644	16.077	14.9383	13.746	12.9546	11.9597	9.89101	7.31709	5.77764	5.84632	6.81668	8.22981	10.4591	13.7424	16.9762	18.7943	19.6364	21.0221	23.1228	24.5159	24.2795	22.8107	20.5914	17.6786	14.0661
-3	2.59569	2.76308	3.26926	3.93586	4.5845	5.03855	5.28244	5.58871	6.1639	6.87418	7.53833	8.18253	8.92081	9.77726	10.6999	11.7121	12.9628	14.5088	16.082	17.3705	18.1933	18.441	18.2953	18.1544	18.0613	17.5388	16.359	15.1068	14.2973	13.2303	10.9087	8.08322	6.68116	7.30164	8.78859	10.4154	12.822	16.5191	20.2925	22.5625	23.7629	25.5307	27.9556	29.2989	28.5308	26.4345	23.8357	20.6452	16.5993
-2	2.43539	2.73794	3.28447	3.93422	4.5464	4.98184	5.24713	5.60967	6.26502	7.05772	7.78548	8.4753	9.25219	10.1585	11.1664	12.2968	13.6534	15.2653	16.904	18.301	19.2572	19.6224	19.5664	19.4973	19.4613	18.9722	17.8166	16.6612	16.0846	15.2781	13.0902	10.3143	9.05331	9.93232	11.6241	13.319	15.8263	19.8065	23.8963	26.2939	27.4518	29.1717	31.5631	32.7368	31.6045	29.1192	26.2548	22.834	18.4534
-1	2.30642	2.73641	3.32662	3.97454	4.57764	5.03477	5.36727	5.81574	6.54924	7.40223	8.16879	8.89257	9.7235	10.7131	11.8285	13.0683	14.4846	16.0789	17.6766	19.0721	20.0829	20.5549	20.6217	20.632	20.6149	20.1305	19.0199	18.0154	17.7415	17.3131	15.4618	12.9121	11.7322	12.5675	14.1806	15.8429	18.4122	22.5621	26.7912	29.1281	30.0434	31.4709	33.6047	34.5809	33.3141	30.7165	27.7202	24.1262	19.5173
0	2.19895	2.72222	3.36583	4.04463	4.67349	5.1684	5.54947	6.02312	6.7387	7.57456	8.37363	9.16128	10.0413	11.0592	12.2102	13.4972	14.9374	16.5102	18.0719	19.4532	20.4776	20.9845	21.0903	21.1192	21.0905	20.5768	19.4338	18.4098	18.1398	17.7157	15.8375	13.2365	12.0141	12.8291	14.4321	16.0939	18.7044	22.9623	27.3289	29.7796	30.7759	32.2699	34.4474	35.4056	34.0477	31.3395	28.2598	24.5872	19.8666
1	2.10376	2.67025	3.36148	4.08854	4.76252	5.29552	5.69215	6.12256	6.72559	7.46801	8.2839	9.14793	10.0547	11.031	12.1303	13.3893	14.8154	16.3782	17.9351	19.3182	20.3356	20.8059	20.8512	20.8206	20.7415	20.1695	18.9309	17.7145	17.1103	16.2747	14.0097	11.1248	9.78097	10.6243	12.2988	13.9979	16.6216	20.903	25.3916	28.1549	29.5992	31.5304	34.026	35.1208	33.7193	30.9266	27.8446	24.2186	19.5232
2	2.01287	2.56934	3.25987	3.99667	4.69197	5.25881	5.6865	6.10086	6.61683	7.26066	8.03342	8.8958	9.79387	10.7352	11.7796	12.9717	14.328	15.8265	17.3301	18.6742	19.6613	20.1004	20.0959	19.9737	19.7776	19.1356	17.8913	16.5831	15.6774	14.5313	12.233	9.49695	8.13174	8.69952	10.1155	11.7384	14.3096	18.4143	22.7599	25.6387	27.3415	29.3564	31.7293	32.8014	31.6475	29.197	26.3728	22.939	18.4386
3	1.93589	2.4431	3.06966	3.749	4.41457	5.00036	5.49013	5.95679	6.46903	7.04802	7.70459	8.45133	9.30067	10.2488	11.2784	12.3913	13.6213	14.97	16.3295	17.5638	18.4965	18.9497	18.9684	18.7661	18.402	17.7058	16.6231	15.4747	14.5407	13.494	11.8557	9.98299	8.79811	8.70046	9.39558	10.7522	13.1628	16.839	20.6639	23.237	24.6907	26.0826	27.585	28.3199	27.7364	26.147	23.8764	20.7772	16.651
4	1.92388	2.39519	2.94862	3.54471	4.14399	4.70724	5.21851	5.70346	6.18876	6.6892	7.22207	7.84266	8.61878	9.53933	10.5264	11.545	12.6334	13.8075	14.9943	16.0945	16.9545	17.4094	17.4557	17.213	16.7515	16.0662	15.1894	14.2746	13.4583	12.6582	11.7287	10.7194	9.81603	9.25997	9.36093	10.385	12.4777	15.588	18.7582	20.8476	21.8752	22.5675	23.2085	23.5526	23.3582	22.4592	20.7126	18.033	14.412
5	2.00877	2.49724	3.01763	3.54788	4.06592	4.54979	4.98436	5.36684	5.71	6.07728	6.53729	7.11359	7.80838	8.60341	9.46328	10.3709	11.3396	12.3696	13.4115	14.3938	15.1659	15.5569	15.5705	15.3431	14.9489	14.3669	13.6119	12.8197	12.1139	11.4309	10.6539	9.84832	9.20479	8.88745	9.02276	9.76848	11.367	13.8944	16.5133	18.192	18.9531	19.4616	19.9442	20.1037	19.7106	18.7532	17.2227	14.99	11.952
6	2.1021	2.61228	3.11773	3.60275	4.05167	4.44879	4.77835	5.02449	5.20158	5.43146	5.839	6.39559	7.00789	7.65393	8.37262	9.17724	10.0367	10.9187	11.7993	12.64	13.2956	13.5916	13.5561	13.3704	13.0959	12.6142	11.8828	11.1095	10.4839	9.84086	8.92552	7.95366	7.45719	7.58219	7.96567	8.45566	9.5124	11.4772	13.6073	14.9135	15.4843	16.0586	16.742	16.8882	16.139	14.8731	13.4468	11.6671	9.25069
7	2.09351	2.56244	3.03204	3.48437	3.9015	4.26547	4.55743	4.7569	4.87459	5.03238	5.35679	5.82655	6.3579	6.93335	7.59171	8.32814	9.06485	9.74287	10.3834	11.0042	11.4991	11.7225	11.6876	11.5276	11.2656	10.7623	9.97625	9.17697	8.60833	8.05625	7.18532	6.19971	5.66624	5.72376	5.94611	6.1363	6.76423	8.20145	9.79747	10.6689	10.9453	11.3659	12.0164	12.2098	11.5655	10.4864	9.36041	8.03108	6.2407
8	2.01769	2.3921	2.81002	3.24059	3.65295	4.01631	4.30726	4.51558	4.65087	4.78809	5.00911	5.3396	5.77965	6.32199	6.9526	7.62157	8.2216	8.6816	9.06077	9.42624	9.72999	9.88211	9.85494	9.66796	9.29912	8.66479	7.77189	6.89481	6.28207	5.76622	5.05771	4.20423	3.48311	3.01737	2.72387	2.61246	2.95991	3.94276	5.01907	5.4929	5.48905	5.62776	6.05599	6.35879	6.25543	5.83582	5.20719	4.32848	3.14363
9	1.99129	2.27214	2.65252	3.07387	3.47762	3.80553	4.03031	4.18007	4.28949	4.3963	4.5386	4.75248	5.07133	5.49712	6.00448	6.53911	7.00155	7.32289	7.54337	7.71513	7.82834	7.84794	7.73239	7.4353	6.91328	6.12766	5.10529	4.05583	3.17634	2.4085	1.60973	0.724346	-0.24077	-1.18896	-1.90863	-2.22038	-2.04451	-1.39323	-0.668637	-0.345416	-0.33186	-0.192663	0.231816	0.772601	1.24864	1.49354	1.38179	0.963284	0.344437
10	2.03044	2.24553	2.60186	3.01053	3.38268	3.63008	3.72445	3.74484	3.76698	3.81547	3.90248	4.03212	4.20528	4.42964	4.71826	5.05526	5.37805	5.63038	5.78928	5.8403	5.78181	5.61569	5.31995	4.8543	4.18235	3.27401	2.13334	0.858659	-0.442963	-1.70864	-2.89729	-4.04556	-5.23992	-6.41386	-7.30095	-7.70755	-7.65531	-7.23022	-6.67718	-6.26266	-5.93322	-5.4415	-4.70075	-3.81574	-2.92879	-2.24181	-1.91308	-1.86774	-1.96487
11	2.0388	2.21172	2.52257	2.87972	3.19153	3.36713	3.38241	3.33279	3.30301	3.29588	3.29818	3.31251	3.34867	3.41863	3.53587	3.6948	3.85907	3.98746	4.03226	3.95099	3.74367	3.42536	2.98152	2.37491	1.57813	0.578758	-0.630825	-2.04808	-3.65044	-5.31023	-6.87219	-8.30746	-9.67209	-10.9171	-11.8549	-12.3568	-12.4637	-12.251	-11.8351	-11.3318	-10.703	-9.81886	-8.68598	-7.47152	-6.33198	-5.37955	-4.68979	-4.20002	-3.80882
12	1.96742	2.11385	2.34725	2.60938	2.84204	2.98745	3.02894	3.02335	3.01317	2.963	2.83355	2.68454	2.61524	2.64035	2.70223	2.74791	2.73566	2.63536	2.45021	2.18965	1.86101	1.46783	0.969921	0.294286	-0.589792	-1.65076	-2.87166	-4.28998	-5.92975	-7.68293	-9.39985	-11.001	-12.455	-13.7106	-14.6894	-15.3364	-15.6587	-15.6772	-15.4353	-14.9749	-14.2438	-13.1371	-11.725	-10.2829	-9.00813	-7.89726	-6.91824	-6.03247	-5.19966
13	1.87975	2.00309	2.17162	2.35775	2.53387	2.67254	2.75707	2.79011	2.76658	2.64678	2.401	2.12991	1.98461	1.97586	1.99452	1.94903	1.78237	1.46901	1.07275	0.664772	0.249768	-0.196681	-0.736565	-1.45958	-2.39789	-3.49954	-4.72985	-6.12089	-7.70046	-9.40509	-11.1384	-12.799	-14.2837	-15.5324	-16.5414	-17.3015	-17.7806	-17.9496	-17.8148	-17.3879	-16.6148	-15.4065	-13.8618	-12.2983	-10.9238	-9.67162	-8.45498	-7.26145	-6.09993
14	1.81985	1.91629	2.06966	2.24782	2.41863	2.54998	2.61144	2.57557	2.42652	2.18837	1.89772	1.61807	1.42078	1.30356	1.20114	1.0487	0.785519	0.383192	-0.0858389	-0.54398	-1.00904	-1.53658	-2.17545	-2.96885	-3.93679	-5.06604	-6.34542	-7.77674	-9.35591	-11.032	-12.7357	-14.3771	-15.8533	-17.1029	-18.119	-18.8881	-19.3718	-19.5319	-19.3525	-18.8248	-17.9375	-16.6816	-15.1521	-13.5652	-12.0667	-10.6295	-9.21399	-7.83071	-6.50494
15	1.68881	1.77131	1.93496	2.12896	2.30249	2.40487	2.3947	2.24721	1.9642	1.63559	1.35731	1.12555	0.893717	0.649603	0.410151	0.165218	-0.140369	-0.541548	-0.996698	-1.46092	-1.96589	-2.57163	-3.30342	-4.15989	-5.1493	-6.29468	-7.60974	-9.07882	-10.6739	-12.325	-13.9495	-15.4888	-16.9013	-18.1374	-19.1372	-19.8506	-20.2549	-20.3293	-20.0427	-19.3678	-18.3541	-17.098	-15.6773	-14.1467	-12.5588	-10.9651	-9.41407	-7.94059	-6.57593
16	1.37823	1.47947	1.64221	1.81458	1.94472	1.981	1.89317	1.68924	1.39575	1.0909	0.849757	0.639614	0.383532	0.0762443	-0.22666	-0.50837	-0.817542	-1.19501	-1.63833	-2.13866	-2.70076	-3.3358	-4.06933	-4.9375	-5.95451	-7.10245	-8.37026	-9.77306	-11.3123	-12.8845	-14.3573	-15.7066	-16.9819	-18.1602	-19.1226	-19.7777	-20.1183	-20.1421	-19.8071	-19.07	-18.0182	-16.8168	-15.5321	-14.1139	-12.5491	-10.9235	-9.33025	-7.83722	-6.50097
17	1.03588	1.17751	1.32671	1.44836	1.50729	1.46866	1.32466	1.11581	0.883585	0.654808	0.446521	0.227287	-0.0526169	-0.382384	-0.700018	-0.984537	-1.28353	-1.64382	-2.09033	-2.63614	-3.24525	-3.86803	-4.54501	-5.3844	-6.4112	-7.52765	-8.67307	-9.91764	-11.3215	-12.7565	-14.0416	-15.1781	-16.2905	-17.3793	-18.2807	-18.8719	-19.1601	-19.1611	-18.834	-18.132	-17.1429	-16.0345	-14.8662	-13.569	-12.1119	-10.565	-9.01544	-7.56586	-6.31292
18	0.93301	1.10926	1.24876	1.33447	1.34935	1.27653	1.11599	0.89784	0.655039	0.419588	0.213871	-0.00925111	-0.322921	-0.709657	-1.07526	-1.38186	-1.68612	-2.04401	-2.48248	-3.0153	-3.60769	-4.21126	-4.86518	-5.67418	-6.6511	-7.67369	-8.66932	-9.734	-10.957	-12.2205	-13.3472	-14.3452	-15.3477	-16.349	-17.1603	-17.6464	-17.8369	-17.7753	-17.4475	-16.8279	-15.967	-14.9615	-13.8552	-12.6303	-11.2841	-9.85697	-8.40965	-7.06919	-5.96461
19	1.06398	1.23963	1.37248	1.45137	1.46513	1.40259	1.25137	0.99693	0.65006	0.312249	0.0804911	-0.130032	-0.476204	-0.949295	-1.39992	-1.75826	-2.0896	-2.45562	-2.86808	-3.32984	-3.8496	-4.43882	-5.11619	-5.90504	-6.7839	-7.66654	-8.50878	-9.39842	-10.4185	-11.4922	-12.4952	-13.4262	-14.3655	-15.2751	-15.9613	-16.2967	-16.3458	-16.1902	-15.8496	-15.3235	-14.6064	-13.6913	-12.6043	-11.4102	-10.1594	-8.86516	-7.55859	-6.37484	-5.45675
20	1.1464	1.25516	1.36641	1.45207	1.48404	1.43423	1.27267	0.966125	0.522368	0.0959256	-0.161212	-0.356278	-0.701133	-1.20466	-1.703	-2.11009	-2.47382	-2.84191	-3.2234	-3.62473	-4.08506	-4.65364	-5.33494	-6.09855	-6.89582	-7.65305	-8.33797	-9.03995	-9.84735	-10.721	-11.5814	-12.4136	-13.2452	-14.0123	-14.5318	-14.6986	-14.6229	-14.4262	-14.1192	-13.6762	-13.0539	-12.2014	-11.1477	-10.0153	-8.88846	-7.75429	-6.61448	-5.59613	-4.83877
21	1.03531	1.01735	1.09114	1.1882	1.24004	1.17843	0.961413	0.594002	0.116653	-0.321656	-0.580629	-0.76192	-1.06577	-1.51932	-2.00201	-2.43621	-2.82096	-3.16885	-3.51345	-3.89162	-4.33499	-4.87164	-5.50792	-6.23261	-6.99111	-7.66689	-8.20131	-8.71141	-9.31906	-9.99801	-10.6734	-11.3253	-11.9695	-12.5414	-12.8709	-12.8774	-12.7216	-12.5607	-12.3449	-11.9646	-11.3729	-10.5643	-9.59373	-8.5866	-7.62194	-6.66677	-5.70096	-4.83061	-4.17722
22	0.868349	0.741334	0.794606	0.913588	0.983706	0.891114	0.588561	0.14797	-0.337865	-0.745975	-0.974692	-1.1292	-1.39868	-1.81887	-2.2943	-2.74533	-3.12461	-3.4154	-3.68823	-4.0221	-4.43981	-4.94175	-5.53041	-6.20874	-6.92087	-7.52609	-7.9504	-8.32547	-8.78905	-9.30848	-9.79648	-10.2455	-10.7007	-11.1094	-11.2906	-11.1666	-10.9383	-10.7945	-10.6436	-10.3164	-9.77021	-9.04151	-8.19579	-7.33058	-6.506	-5.69462	-4.87886	-4.13895	-3.56702
23	0.764742	0.611947	0.684806	0.835875	0.917712	0.783969	0.388875	-0.133379	-0.638438	-1.01216	-1.17741	-1.28092	-1.558	-2.03655	-2.56731	-3.03155	-3.36878	-3.56192	-3.71405	-3.94068	-4.28445	-4.75649	-5.33307	-5.96339	-6.58065	-7.096	-7.4701	-7.80713	-8.20972	-8.62799	-8.96691	-9.25038	-9.58094	-9.91893	-10.0381	-9.83025	-9.51336	-9.30095	-9.12897	-8.85354	-8.4224	-7.84121	-7.144	-6.39685	-5.64994	-4.91393	-4.20368	-3.57692	-3.09206
24	0.65611	0.55182	0.657269	0.820536	0.889699	0.714069	0.255902	-0.320448	-0.842995	-1.1871	-1.2765	-1.3147	-1.61352	-2.18375	-2.77962	-3.22991	-3.49655	-3.5885	-3.62506	-3.73778	-3.99702	-4.44225	-5.01795	-5.59651	-6.09737	-6.51068	-6.85109	-7.18647	-7.57227	-7.93914	-8.18489	-8.35688	-8.60161	-8.894	-8.98378	-8.74115	-8.37499	-8.09953	-7.8914	-7.65522	-7.33276	-6.89009	-6.3292	-5.69366	-5.0261	-4.36177	-3.737	-3.19753	-2.78279
25	0.457042	0.442979	0.558672	0.684931	0.702563	0.493402	0.0331548	-0.534499	-1.05172	-1.37229	-1.39862	-1.3733	-1.66989	-2.28304	-2.88487	-3.27122	-3.45344	-3.48182	-3.46793	-3.5292	-3.74269	-4.161	-4.71273	-5.23267	-5.63441	-5.94884	-6.22221	-6.5182	-6.88137	-7.22914	-7.44529	-7.56442	-7.72185	-7.91077	-7.93725	-7.70412	-7.38731	-7.16247	-6.99042	-6.76937	-6.45926	-6.05907	-5.58641	-5.07998	-4.56665	-4.04433	-3.51682	-3.03247	-2.64334
26	0.296114	0.333943	0.430597	0.502319	0.46535	0.236692	-0.196959	-0.724207	-1.21405	-1.51186	-1.50633	-1.44507	-1.71386	-2.29991	-2.85133	-3.16244	-3.28001	-3.28051	-3.26224	-3.32284	-3.52763	-3.92109	-4.429	-4.88744	-5.21319	-5.44295	-5.63121	-5.85625	-6.1761	-6.50866	-6.73136	-6.84354	-6.92702	-6.98709	-6.92759	-6.71508	-6.48982	-6.3767	-6.28667	-6.07447	-5.72444	-5.30142	-4.86642	-4.47434	-4.14115	-3.79684	-3.38351	-2.95074	-2.56953
27	0.387891	0.343867	0.399107	0.456163	0.417583	0.186808	-0.251296	-0.766158	-1.21767	-1.48556	-1.49294	-1.45107	-1.68172	-2.17937	-2.65987	-2.94844	-3.06044	-3.04669	-3.01565	-3.07809	-3.28597	-3.66109	-4.1257	-4.52705	-4.79086	-4.95887	-5.08819	-5.25354	-5.51202	-5.80188	-6.0246	-6.15432	-6.21483	-6.20328	-6.08104	-5.85603	-5.65855	-5.59515	-5.5561	-5.37617	-5.03618	-4.60817	-4.1743	-3.8267	-3.59775	-3.38525	-3.0952	-2.75283	-2.41157
28	0.651356	0.433582	0.439375	0.518103	0.519132	0.293177	-0.185689	-0.722661	-1.13555	-1.36824	-1.41406	-1.42533	-1.61416	-1.992	-2.399	-2.70786	-2.85248	-2.8208	-2.75367	-2.80477	-3.01563	-3.37785	-3.80728	-4.16313	-4.38205	-4.51462	-4.61908	-4.75026	-4.94898	-5.17915	-5.37951	-5.51786	-5.58201	-5.55109	-5.39267	-5.12339	-4.88436	-4.79396	-4.75744	-4.62219	-4.34376	-3.94665	-3.50483	-3.14862	-2.94305	-2.8002	-2.62738	-2.40343	-2.12853
29	0.741584	0.422591	0.39173	0.470343	0.479771	0.242972	-0.269214	-0.821331	-1.20537	-1.40819	-1.46968	-1.50231	-1.64454	-1.91971	-2.25232	-2.54834	-2.68911	-2.6231	-2.5174	-2.55777	-2.77176	-3.12051	-3.51892	-3.84771	-4.05259	-4.17444	-4.26333	-4.37428	-4.5493	-4.75067	-4.91468	-5.00925	-5.02406	-4.94257	-4.7397	-4.43661	-4.17139	-4.05996	-4.01388	-3.88847	-3.63442	-3.26363	-2.84386	-2.50696	-2.32592	-2.23431	-2.15119	-2.0152	-1.77801
30	0.529742	0.258766	0.214563	0.246325	0.203246	-0.0640412	-0.573166	-1.10604	-1.4704	-1.65255	-1.68825	-1.68633	-1.78195	-1.99774	-2.25979	-2.48007	-2.55289	-2.43812	-2.30721	-2.34594	-2.56274	-2.89405	-3.26186	-3.57795	-3.79409	-3.92021	-3.98933	-4.08641	-4.28063	-4.49856	-4.6224	-4.61855	-4.51153	-4.32084	-4.05793	-3.75997	-3.52966	-3.44388	-3.39668	-3.23604	-2.94262	-2.58002	-2.22513	-1.96868	-1.85455	-1.82041	-1.78921	-1.68255	-1.43288
31	0.269448	0.116235	0.0746461	0.0474459	-0.0625999	-0.351683	-0.820527	-1.29903	-1.6342	-1.79673	-1.79864	-1.75498	-1.81909	-2.0059	-2.21204	-2.34616	-2.3423	-2.19099	-2.05346	-2.09738	-2.31422	-2.6254	-2.96043	-3.25559	-3.46921	-3.59125	-3.64416	-3.73449	-3.94991	-4.18532	-4.27684	-4.18844	-3.97274	-3.68654	-3.38974	-3.13837	-2.97829	-2.92847	-2.87914	-2.69299	-2.38056	-2.04375	-1.76409	-1.59754	-1.5594	-1.57763	-1.56977	-1.45984	-1.18597
32	0.173332	0.130048	0.0981738	0.0305333	-0.120051	-0.400109	-0.796876	-1.19149	-1.47499	-1.61259	-1.60104	-1.5486	-1.60534	-1.77748	-1.94848	-2.03049	-1.98809	-1.83274	-1.70876	-1.76159	-1.97377	-2.26351	-2.56238	-2.8128	-2.98262	-3.07605	-3.12226	-3.21241	-3.41817	-3.63684	-3.71275	-3.60758	-3.36504	-3.05537	-2.78111	-2.61175	-2.52891	-2.49398	-2.43417	-2.27384	-2.02543	-1.75619	-1.5329	-1.42054	-1.43633	-1.49098	-1.4887	-1.36941	-1.09379
33	0.193138	0.231335	0.208187	0.116623	-0.0504287	-0.29973	-0.609902	-0.909208	-1.13049	-1.24141	-1.23113	-1.19076	-1.24973	-1.4074	-1.55232	-1.60733	-1.55609	-1.42012	-1.32281	-1.38585	-1.58912	-1.85632	-2.11874	-2.31445	-2.42117	-2.47359	-2.51563	-2.60451	-2.77939	-2.96203	-3.03802	-2.96598	-2.75651	-2.47484	-2.25568	-2.17726	-2.16513	-2.13424	-2.06508	-1.95858	-1.81201	-1.62195	-1.43245	-1.34288	-1.39067	-1.46802	-1.46367	-1.33936	-1.08498
34	0.22615	0.308663	0.28532	0.17753	0.00670066	-0.205719	-0.434526	-0.647796	-0.813487	-0.901607	-0.894665	-0.864197	-0.915466	-1.04519	-1.15767	-1.19064	-1.14034	-1.03198	-0.965562	-1.03782	-1.22893	-1.4724	-1.70208	-1.85313	-1.90974	-1.9268	-1.95753	-2.0349	-2.1762	-2.32884	-2.41756	-2.39568	-2.23835	-1.99909	-1.83241	-1.82309	-1.86466	-1.84596	-1.78153	-1.71995	-1.64537	-1.50453	-1.32791	-1.24427	-1.30882	-1.40016	-1.39602	-1.27816	-1.0615
35	0.169654	0.250596	0.210209	0.0850728	-0.0882297	-0.27325	-0.445671	-0.602879	-0.736748	-0.811574	-0.797374	-0.751609	-0.765758	-0.840384	-0.898659	-0.894429	-0.834845	-0.74718	-0.706959	-0.785193	-0.961808	-1.18032	-1.38498	-1.52142	-1.57321	-1.5786	-1.58123	-1.62768	-1.7512	-1.90526	-2.01629	-2.02873	-1.90178	-1.68226	-1.53029	-1.53747	-1.60525	-1.62583	-1.59319	-1.53074	-1.43057	-1.26744	-1.08444	-1.00448	-1.07723	-1.1788	-1.18712	-1.09426	-0.925296
36	-0.0790647	-0.0542993	-0.136513	-0.288933	-0.474787	-0.657496	-0.818258	-0.970082	-1.11306	-1.18972	-1.14499	-1.03571	-0.963819	-0.942507	-0.909388	-0.832669	-0.733648	-0.644553	-0.616957	-0.695641	-0.856409	-1.04867	-1.24002	-1.4119	-1.53645	-1.57193	-1.51998	-1.50696	-1.64702	-1.85926	-1.99912	-1.99718	-1.83798	-1.57849	-1.36827	-1.30861	-1.36462	-1.47053	-1.50971	-1.3637	-1.07266	-0.774209	-0.567208	-0.503233	-0.582298	-0.695344	-0.738294	-0.696124	-0.578316
Y-component of velocity field (v_y) for H30
Y↓ & X→	-33	-32	-31	-30	-29	-28	-27	-26	-25	-24	-23	-22	-21	-20	-19	-18	-17	-16	-15	-14	-13	-12	-11	-10	-9	-8	-7	-6	-5	-4	-3	-2	-1	0	1	2	3	4	5	6	7	8	9	10	11	12	13	14	15
-37	0.933473	1.23087	1.35759	1.37232	1.33373	1.29996	1.28024	1.19631	0.990695	0.711924	0.428667	0.184818	0.0115616	-0.0882171	-0.135898	-0.161175	-0.205844	-0.293015	-0.383487	-0.422695	-0.335767	-0.0529899	0.296497	0.435167	0.316129	0.230989	0.346705	0.406816	0.154145	-0.249178	-0.512955	-0.622804	-0.752346	-0.956212	-1.12966	-1.21968	-1.32919	-1.54104	-1.71406	-1.65736	-1.41665	-1.1827	-1.07709	-1.13761	-1.3281	-1.45795	-1.37842	-1.22369	-1.18683
-36	0.249848	0.446164	0.590658	0.679279	0.707976	0.672899	0.588652	0.502851	0.453745	0.434163	0.42564	0.400636	0.329475	0.21646	0.094818	-0.0106536	-0.0902024	-0.143599	-0.196342	-0.263538	-0.259729	-0.0742465	0.178612	0.216251	-0.000581706	-0.153554	-0.0537208	0.0469993	-0.111496	-0.395489	-0.552714	-0.612161	-0.792452	-1.1102	-1.31491	-1.27715	-1.21463	-1.33504	-1.5235	-1.57931	-1.48466	-1.33528	-1.21821	-1.20799	-1.30729	-1.3599	-1.24679	-1.11358	-1.15309
-35	0.0550783	0.260192	0.439598	0.571225	0.633002	0.603264	0.4977	0.398835	0.374675	0.417103	0.496662	0.550957	0.507005	0.365316	0.189091	0.0300763	-0.0816396	-0.135367	-0.175384	-0.238367	-0.241187	-0.0684399	0.160852	0.152402	-0.128143	-0.33335	-0.253057	-0.145362	-0.280958	-0.5347	-0.663316	-0.719532	-0.954572	-1.36576	-1.61575	-1.52839	-1.38617	-1.46706	-1.66746	-1.77711	-1.74579	-1.62383	-1.49145	-1.46168	-1.55867	-1.60418	-1.46138	-1.30388	-1.35822
-34	0.169077	0.449424	0.672363	0.82597	0.898323	0.877786	0.778919	0.663163	0.587398	0.575075	0.631356	0.681019	0.618512	0.438558	0.221442	0.0294845	-0.108302	-0.180564	-0.222129	-0.261661	-0.228608	-0.0278584	0.209072	0.181676	-0.138336	-0.379958	-0.318489	-0.226644	-0.390749	-0.677989	-0.830918	-0.911237	-1.19444	-1.67343	-1.96875	-1.88041	-1.71905	-1.79302	-1.99996	-2.12159	-2.09915	-1.97468	-1.83668	-1.82568	-1.9716	-2.05083	-1.88929	-1.69096	-1.72576
-33	0.411756	0.790333	1.0569	1.22132	1.29345	1.2832	1.20385	1.07474	0.925823	0.822414	0.819347	0.836055	0.738353	0.516393	0.266394	0.0560417	-0.0983351	-0.191433	-0.238092	-0.2479	-0.170457	0.0552093	0.28913	0.242126	-0.102944	-0.364938	-0.317204	-0.253223	-0.477374	-0.836537	-1.04168	-1.1536	-1.4678	-1.98373	-2.31043	-2.24023	-2.08856	-2.16884	-2.37502	-2.48357	-2.44385	-2.31418	-2.19373	-2.22702	-2.43544	-2.55988	-2.39761	-2.17119	-2.17925
-32	0.603029	1.05939	1.36116	1.53509	1.60791	1.60625	1.54402	1.41247	1.22386	1.07345	1.05026	1.0613	0.940888	0.679028	0.398469	0.178218	0.0201138	-0.0802177	-0.124787	-0.111562	-0.0152036	0.188475	0.36688	0.271807	-0.0937487	-0.359852	-0.316388	-0.281478	-0.577339	-1.02152	-1.28175	-1.41293	-1.73039	-2.24721	-2.57737	-2.51483	-2.36996	-2.45043	-2.64664	-2.73386	-2.67901	-2.56866	-2.50246	-2.59271	-2.83956	-2.9914	-2.85344	-2.64095	-2.64223
-31	0.596995	1.07472	1.39517	1.58415	1.66748	1.6709	1.61229	1.49555	1.34377	1.25333	1.30868	1.38595	1.27942	0.985778	0.674052	0.448943	0.302827	0.220006	0.191266	0.209486	0.27285	0.375317	0.415858	0.224444	-0.164707	-0.419993	-0.369977	-0.357217	-0.717671	-1.23533	-1.53071	-1.6529	-1.9399	-2.42119	-2.71829	-2.6293	-2.46183	-2.52057	-2.69723	-2.77118	-2.72857	-2.68322	-2.71514	-2.86221	-3.0941	-3.2335	-3.1501	-3.01536	-3.05022
-30	0.517295	0.982802	1.30064	1.49347	1.58394	1.59469	1.54719	1.46083	1.37125	1.37243	1.53952	1.71266	1.64129	1.33124	1.00653	0.79861	0.678873	0.611917	0.5864	0.592978	0.604533	0.584961	0.470132	0.177309	-0.229241	-0.472417	-0.427422	-0.442943	-0.85066	-1.411	-1.71628	-1.81629	-2.06952	-2.51669	-2.77807	-2.65117	-2.44671	-2.47391	-2.63321	-2.71396	-2.71229	-2.75079	-2.88181	-3.07318	-3.27297	-3.39574	-3.38758	-3.35714	-3.43332
-29	0.602875	1.07129	1.36316	1.52303	1.59544	1.62463	1.62946	1.58329	1.49039	1.48133	1.67472	1.89367	1.84605	1.54225	1.24969	1.10519	1.02238	0.928093	0.854291	0.840385	0.839834	0.77352	0.589542	0.259093	-0.142584	-0.390984	-0.39441	-0.466116	-0.898068	-1.4549	-1.74837	-1.84192	-2.10336	-2.5704	-2.84434	-2.71076	-2.48852	-2.49902	-2.65989	-2.77678	-2.83481	-2.92895	-3.09717	-3.30873	-3.52259	-3.6834	-3.75451	-3.79229	-3.8623
-28	0.854728	1.35123	1.61275	1.72297	1.76558	1.82347	1.90757	1.90005	1.74149	1.62717	1.75836	1.96337	1.92205	1.64293	1.41355	1.3548	1.30523	1.14912	0.994942	0.966287	0.998398	0.956072	0.778106	0.461865	0.0788351	-0.194749	-0.286671	-0.439217	-0.875346	-1.39236	-1.66735	-1.78312	-2.09487	-2.62391	-2.95116	-2.84892	-2.6413	-2.66003	-2.84435	-3.0209	-3.14917	-3.27117	-3.42295	-3.63197	-3.89237	-4.12513	-4.26079	-4.31763	-4.32832
-27	1.06086	1.58581	1.8501	1.95471	2.00067	2.08793	2.22118	2.23462	2.03554	1.85345	1.9344	2.11888	2.08419	1.83381	1.64803	1.63062	1.58734	1.38861	1.19339	1.17607	1.24255	1.20019	0.989731	0.655406	0.274383	-0.0325417	-0.218049	-0.450337	-0.881441	-1.35492	-1.62999	-1.79506	-2.15869	-2.72247	-3.08389	-3.0255	-2.85977	-2.90873	-3.12894	-3.36931	-3.57171	-3.73672	-3.89034	-4.08714	-4.34417	-4.59114	-4.75626	-4.81451	-4.75158
-26	1.16207	1.69539	2.00134	2.16149	2.25741	2.36982	2.50125	2.51433	2.33635	2.17555	2.25322	2.42657	2.40595	2.18794	2.01212	1.96984	1.90157	1.70609	1.53713	1.55401	1.62622	1.52054	1.20259	0.790774	0.38396	0.0470598	-0.206101	-0.497487	-0.933551	-1.39574	-1.70487	-1.93326	-2.32105	-2.85938	-3.21195	-3.20222	-3.10762	-3.2121	-3.47797	-3.77244	-4.04001	-4.27364	-4.47781	-4.66951	-4.85936	-5.04209	-5.19824	-5.25413	-5.12761
-25	1.37115	1.8818	2.21921	2.43668	2.58751	2.72438	2.84619	2.85553	2.70517	2.56144	2.60051	2.72126	2.70967	2.55147	2.4022	2.32569	2.22967	2.06137	1.93707	1.96748	2.01086	1.83889	1.43905	0.964272	0.526693	0.173349	-0.0991533	-0.42135	-0.905182	-1.42852	-1.80399	-2.07814	-2.45449	-2.93966	-3.28064	-3.34882	-3.3698	-3.56971	-3.90064	-4.23565	-4.53587	-4.8167	-5.07644	-5.2925	-5.45765	-5.60164	-5.73593	-5.76707	-5.58391
-24	1.81017	2.26512	2.58926	2.82131	2.99997	3.16342	3.30161	3.31815	3.16051	2.96355	2.87945	2.88121	2.8658	2.80429	2.73109	2.65744	2.554	2.41367	2.31078	2.30901	2.29809	2.10858	1.72705	1.26012	0.807608	0.455006	0.212709	-0.116278	-0.703904	-1.3707	-1.83561	-2.12272	-2.46281	-2.90777	-3.27185	-3.45916	-3.638	-3.97127	-4.38776	-4.75255	-5.04774	-5.32722	-5.61328	-5.88994	-6.13831	-6.33784	-6.45945	-6.43643	-6.20126
-23	2.20967	2.60084	2.89897	3.13261	3.33029	3.52004	3.68229	3.71232	3.54645	3.29783	3.10509	3.00496	2.98697	3.01247	3.01938	2.97153	2.87563	2.75252	2.65538	2.62556	2.58603	2.41862	2.09887	1.67511	1.22655	0.874193	0.644983	0.292982	-0.397698	-1.19731	-1.74631	-2.05902	-2.40409	-2.86865	-3.29754	-3.60507	-3.91968	-4.36297	-4.8542	-5.25979	-5.57182	-5.85965	-6.164	-6.4906	-6.81985	-7.08004	-7.1991	-7.135	-6.86149
-22	2.28057	2.62772	2.92673	3.18737	3.41939	3.6322	3.80172	3.84396	3.70949	3.49353	3.31372	3.2163	3.21287	3.26817	3.30746	3.28452	3.20091	3.07832	2.98803	2.98884	2.99448	2.86792	2.58077	2.18865	1.76278	1.39373	1.09624	0.668304	-0.0632269	-0.888876	-1.48936	-1.88769	-2.33927	-2.91714	-3.45144	-3.84425	-4.21785	-4.69432	-5.22226	-5.7023	-6.11291	-6.48071	-6.82248	-7.1426	-7.43304	-7.65973	-7.77954	-7.72435	-7.43074
-21	2.1641	2.49627	2.81935	3.12297	3.39679	3.63029	3.79865	3.85145	3.76568	3.62503	3.52694	3.49533	3.5202	3.57458	3.61716	3.61441	3.54602	3.42283	3.34997	3.41869	3.50895	3.42756	3.15109	2.78627	2.40526	2.02541	1.62906	1.11225	0.394825	-0.38027	-1.00909	-1.52588	-2.12581	-2.84575	-3.51289	-4.02358	-4.48189	-5.00074	-5.57578	-6.16515	-6.72422	-7.20744	-7.59379	-7.89098	-8.11053	-8.2688	-8.36203	-8.29284	-7.95412
-20	2.16611	2.51204	2.86126	3.19637	3.49994	3.75447	3.93413	3.99821	3.9323	3.82082	3.75949	3.76582	3.8217	3.89888	3.9607	3.97686	3.92776	3.82682	3.7885	3.91116	4.05896	4.01584	3.76783	3.45518	3.14612	2.79913	2.36817	1.81851	1.13538	0.407577	-0.250099	-0.862542	-1.54912	-2.34089	-3.1517	-3.91651	-4.64247	-5.34847	-6.05661	-6.78364	-7.47586	-8.03811	-8.44996	-8.77899	-9.05787	-9.23027	-9.23166	-9.01475	-8.54788
-19	2.30599	2.66587	3.03781	3.40095	3.73438	4.01713	4.21865	4.29138	4.2173	4.08957	4.01557	4.02528	4.11207	4.23451	4.32218	4.33908	4.30611	4.26186	4.28445	4.4326	4.58804	4.57346	4.38861	4.16793	3.96316	3.70149	3.31925	2.80546	2.1676	1.4668	0.777401	0.0983119	-0.623847	-1.44473	-2.42144	-3.55334	-4.69532	-5.71289	-6.63849	-7.54591	-8.3795	-9.00759	-9.43784	-9.84169	-10.2754	-10.5176	-10.369	-9.89996	-9.25178
-18	2.3726	2.69607	3.09442	3.5185	3.91913	4.24722	4.46103	4.53192	4.46015	4.34358	4.29084	4.33034	4.45179	4.59602	4.66347	4.63032	4.59665	4.64477	4.76571	4.92634	5.05254	5.0608	4.9721	4.88624	4.82313	4.68443	4.39195	3.9499	3.37972	2.71941	2.01028	1.25993	0.451296	-0.484483	-1.68268	-3.1695	-4.68751	-5.99585	-7.15969	-8.32114	-9.39873	-10.1788	-10.663	-11.1067	-11.5988	-11.8243	-11.5111	-10.827	-10.0443
-17	2.28608	2.51939	2.95144	3.47534	3.9842	4.37169	4.58003	4.63841	4.59679	4.54687	4.57783	4.6919	4.85036	4.97941	4.97716	4.85542	4.81023	4.9729	5.21834	5.39234	5.47893	5.51779	5.55325	5.63176	5.73081	5.72831	5.53568	5.18005	4.7028	4.11163	3.40201	2.56637	1.59401	0.430542	-1.0347	-2.80091	-4.5793	-6.11158	-7.51983	-9.01536	-10.4611	-11.5127	-12.1159	-12.559	-12.9679	-13.0628	-12.6066	-11.8046	-10.9596
-16	2.17662	2.33546	2.80617	3.42716	4.03687	4.4747	4.6708	4.71766	4.7174	4.74654	4.8647	5.04855	5.23668	5.35147	5.30359	5.13598	5.10474	5.36866	5.71924	5.91789	5.99996	6.10459	6.28303	6.51791	6.74929	6.85837	6.76475	6.50863	6.13845	5.62966	4.93366	4.02797	2.90739	1.53542	-0.165271	-2.17064	-4.19656	-5.99642	-7.71797	-9.59588	-11.4416	-12.8142	-13.6089	-14.1183	-14.4889	-14.4918	-13.9376	-13.0453	-12.1192
-15	2.12689	2.27997	2.79007	3.47046	4.13442	4.59646	4.78485	4.83141	4.86855	4.95579	5.12723	5.34857	5.55479	5.67971	5.65808	5.54313	5.57841	5.90959	6.3198	6.56759	6.71499	6.93604	7.26372	7.62214	7.93141	8.11002	8.10669	7.95531	7.68954	7.25666	6.57769	5.63235	4.43969	2.96657	1.11126	-1.12227	-3.45447	-5.63398	-7.76819	-10.0426	-12.2465	-13.9332	-14.9906	-15.7009	-16.2006	-16.2506	-15.6561	-14.6527	-13.5664
-14	2.02585	2.22806	2.76983	3.46851	4.14146	4.6073	4.80012	4.8606	4.9288	5.06644	5.30554	5.58697	5.81375	5.94099	5.96956	5.96875	6.11536	6.50868	6.97305	7.317	7.59757	7.96228	8.42402	8.89209	9.28486	9.53773	9.61221	9.53933	9.34508	8.95692	8.27403	7.28321	6.02994	4.48142	2.50185	0.0645724	-2.56711	-5.14279	-7.70433	-10.3575	-12.8881	-14.8922	-16.2599	-17.2283	-17.9004	-18.0365	-17.4446	-16.3551	-15.0915
-13	1.76755	2.04256	2.59997	3.28213	3.93139	4.39117	4.60457	4.69302	4.7874	4.98641	5.35595	5.77227	6.03672	6.12795	6.17624	6.29867	6.58325	7.06503	7.62049	8.11846	8.58049	9.08506	9.6475	10.2337	10.775	11.1547	11.2974	11.2545	11.0766	10.6834	9.95601	8.87859	7.50455	5.81117	3.67515	1.06728	-1.7899	-4.6778	-7.5948	-10.5848	-13.4331	-15.7717	-17.4657	-18.6551	-19.3993	-19.5426	-18.9674	-17.8583	-16.4675
-12	1.49618	1.80556	2.36007	3.02089	3.64924	4.10724	4.34382	4.46314	4.58924	4.85943	5.37444	5.94291	6.25963	6.3189	6.37035	6.58443	6.99113	7.57882	8.24468	8.88331	9.48912	10.0964	10.7381	11.4446	12.1593	12.6999	12.9405	12.9398	12.7645	12.3411	11.5533	10.3769	8.8496	6.95536	4.60701	1.79362	-1.29331	-4.46412	-7.69685	-11.0019	-14.1596	-16.8126	-18.7881	-20.1315	-20.8653	-20.9338	-20.3107	-19.1517	-17.651
-11	1.43243	1.6721	2.20529	2.8752	3.52507	3.9992	4.24273	4.38115	4.55567	4.89669	5.49247	6.13723	6.51121	6.60673	6.68235	6.92454	7.39014	8.07701	8.83395	9.50754	10.1206	10.7638	11.485	12.2979	13.1387	13.8329	14.2466	14.3826	14.2563	13.8161	12.9903	11.7508	10.0984	7.9999	5.37726	2.23521	-1.20694	-4.73288	-8.3092	-11.9392	-15.3888	-18.2825	-20.4287	-21.8535	-22.5672	-22.517	-21.6932	-20.3187	-18.6598
-10	1.54766	1.65963	2.15996	2.85345	3.54488	4.04044	4.2753	4.41542	4.62929	5.00942	5.602	6.23557	6.65446	6.83774	6.96524	7.2013	7.67499	8.42879	9.24224	9.88932	10.4439	11.0912	11.888	12.7913	13.7212	14.5486	15.1557	15.4669	15.4198	14.9828	14.1354	12.852	11.1027	8.82197	5.89814	2.33935	-1.53946	-5.43206	-9.31616	-13.2332	-16.9317	-19.9853	-22.194	-23.6257	-24.3	-24.0955	-22.9619	-21.2565	-19.4087
-9	1.63345	1.68561	2.15323	2.83224	3.51857	4.00957	4.23483	4.36045	4.55322	4.89514	5.4256	6.00797	6.43685	6.68458	6.8758	7.14428	7.63053	8.3931	9.23031	9.93069	10.5516	11.252	12.0982	13.0838	14.1349	15.0821	15.7764	16.1471	16.1387	15.708	14.8177	13.4474	11.5869	9.1527	5.96639	2.02698	-2.20728	-6.30175	-10.3009	-14.3635	-18.2298	-21.3882	-23.6038	-24.9692	-25.518	-25.1116	-23.6989	-21.7302	-19.7397
-8	1.58404	1.69075	2.13178	2.74136	3.35372	3.80414	4.02692	4.13343	4.24945	4.48665	4.92606	5.44578	5.84329	6.09934	6.35119	6.70943	7.23362	7.94748	8.77637	9.63317	10.4758	11.2866	12.1451	13.2012	14.4136	15.4621	16.1039	16.3751	16.3349	15.8972	14.9341	13.4405	11.4925	9.00513	5.68245	1.48513	-2.94991	-7.02955	-10.9123	-14.9411	-18.863	-22.064	-24.2521	-25.5177	-25.9079	-25.3241	-23.7548	-21.6698	-19.613
-7	1.43988	1.65072	2.06934	2.58755	3.09715	3.49057	3.71661	3.82493	3.89111	4.04544	4.40037	4.84677	5.18739	5.42211	5.71852	6.16741	6.72748	7.3722	8.15913	9.13429	10.1609	11.048	11.8871	12.9811	14.3188	15.428	15.9722	16.0974	15.9821	15.5092	14.4754	12.9244	11.0625	8.78246	5.5658	1.26561	-3.26793	-7.23797	-10.8982	-14.7679	-18.6124	-21.7405	-23.8436	-25.0683	-25.4852	-24.9362	-23.356	-21.2348	-19.1531
-6	1.23749	1.54079	1.93458	2.36414	2.77474	3.11191	3.34574	3.49019	3.5832	3.73137	4.03174	4.39778	4.67104	4.8753	5.18881	5.68399	6.25534	6.8389	7.55226	8.50706	9.54364	10.4163	11.2168	12.2893	13.6296	14.72	15.1952	15.2291	15.0333	14.5	13.432	11.9556	10.4076	8.62604	5.7959	1.60277	-2.90817	-6.7348	-10.1572	-13.7879	-17.4135	-20.3217	-22.2626	-23.5347	-24.2463	-24.011	-22.5583	-20.4413	-18.3683
-5	0.974979	1.32836	1.67761	2.01439	2.33036	2.61715	2.86435	3.0578	3.20248	3.37247	3.63854	3.93348	4.13762	4.29568	4.59128	5.08722	5.6449	6.17406	6.79396	7.62779	8.55637	9.3802	10.1494	11.1011	12.2233	13.1366	13.5652	13.6038	13.3767	12.8084	11.7753	10.4575	9.23109	7.90957	5.57236	1.82114	-2.31463	-5.83054	-8.96581	-12.2842	-15.5721	-18.149	-19.8476	-21.108	-22.0748	-22.1562	-20.8941	-18.8827	-16.9266
-4	0.66487	1.00599	1.27862	1.51219	1.73613	1.97954	2.24177	2.46895	2.62968	2.79209	3.02795	3.2734	3.41339	3.50313	3.74151	4.19556	4.71299	5.18492	5.70153	6.36963	7.14935	7.94504	8.70527	9.41267	10.0456	10.5752	10.9569	11.104	10.9304	10.3944	9.48341	8.35009	7.25197	6.06374	4.1608	1.26276	-1.96733	-4.87856	-7.61957	-10.5387	-13.3857	-15.5539	-16.9301	-17.9833	-18.8772	-19.0199	-17.943	-16.1954	-14.5304
-3	0.431459	0.709111	0.897042	1.04174	1.18967	1.38684	1.63298	1.84517	1.96899	2.08176	2.26945	2.46642	2.54896	2.56726	2.71852	3.07433	3.49684	3.87979	4.27598	4.76267	5.37302	6.11186	6.82421	7.2371	7.32357	7.41617	7.71174	7.94797	7.83152	7.3496	6.59028	5.65173	4.63551	3.50616	2.05041	0.168773	-1.92419	-4.01946	-6.18166	-8.52679	-10.778	-12.4279	-13.4011	-14.1306	-14.7838	-14.8709	-14.0004	-12.6257	-11.3661
-2	0.41522	0.601666	0.72993	0.830313	0.933116	1.06825	1.23004	1.34912	1.38302	1.40815	1.50847	1.62884	1.65959	1.62781	1.67646	1.86389	2.10653	2.33772	2.58452	2.89332	3.31661	3.89432	4.44195	4.60883	4.36975	4.17564	4.30689	4.4617	4.29799	3.82394	3.17026	2.43642	1.69812	0.952644	0.0960359	-0.934819	-2.08411	-3.29817	-4.62734	-6.12872	-7.56893	-8.54607	-9.03804	-9.46876	-10.0029	-10.1698	-9.58142	-8.6086	-7.7736
-1	0.501217	0.614837	0.704566	0.776047	0.83492	0.886677	0.922924	0.910418	0.834785	0.757736	0.744402	0.760521	0.731584	0.658752	0.607511	0.609256	0.637275	0.673909	0.746544	0.88992	1.129	1.47394	1.77156	1.74821	1.38784	1.0508	0.965753	0.909913	0.629119	0.140146	-0.440523	-0.957091	-1.23174	-1.28517	-1.39636	-1.73324	-2.14312	-2.47269	-2.81623	-3.32028	-3.84011	-4.06133	-4.02894	-4.21002	-4.77466	-5.17661	-4.94534	-4.38897	-3.97862
0	0.413889	0.531807	0.576487	0.568238	0.527371	0.47401	0.411254	0.311737	0.161178	0.0029553	-0.115532	-0.211624	-0.32925	-0.469731	-0.598245	-0.705762	-0.826552	-0.974335	-1.08574	-1.09365	-1.00517	-0.863038	-0.798758	-1.00816	-1.49276	-1.97109	-2.25599	-2.4865	-2.82827	-3.27378	-3.74342	-4.02533	-3.82436	-3.16405	-2.48376	-2.05739	-1.6758	-1.12467	-0.540759	-0.144225	0.15498	0.627912	1.17126	1.24216	0.639308	-0.0206777	-0.184811	-0.0863372	-0.130406
1	0.121905	0.302971	0.28765	0.14873	-0.0410003	-0.209248	-0.329121	-0.454956	-0.630808	-0.834293	-1.03376	-1.23783	-1.47066	-1.71189	-1.90393	-2.04699	-2.23607	-2.52472	-2.80874	-2.97195	-3.02174	-3.02073	-3.1184	-3.52651	-4.23618	-4.91769	-5.34137	-5.62823	-5.93413	-6.26501	-6.55956	-6.58072	-5.97845	-4.74258	-3.30707	-1.97673	-0.659341	0.749442	2.10536	3.21121	4.1575	5.20085	6.1976	6.53457	5.96416	5.11407	4.56917	4.18687	3.66129
2	-0.101897	0.0878431	0.0132982	-0.225171	-0.527205	-0.793046	-0.978164	-1.13685	-1.32208	-1.54577	-1.81036	-2.11567	-2.45852	-2.80374	-3.0898	-3.31689	-3.5858	-3.96319	-4.37952	-4.74437	-5.00547	-5.13981	-5.33317	-5.92525	-6.91987	-7.83017	-8.31734	-8.56482	-8.80422	-9.02201	-9.10767	-8.82853	-7.87425	-6.19902	-4.10273	-1.85153	0.43039	2.63836	4.65579	6.38013	7.90588	9.43794	10.8021	11.3803	10.9094	9.97414	9.13486	8.32435	7.33389
3	-0.0952886	-0.0151678	-0.141314	-0.404383	-0.73503	-1.06418	-1.34718	-1.58313	-1.78814	-2.0226	-2.34652	-2.7446	-3.16905	-3.59442	-4.01451	-4.42716	-4.83564	-5.25818	-5.75872	-6.37803	-6.94768	-7.24517	-7.49169	-8.23979	-9.53257	-10.6652	-11.1565	-11.3156	-11.5112	-11.6641	-11.5382	-10.9324	-9.67277	-7.69484	-5.07604	-1.98662	1.19484	4.11615	6.72235	9.05484	11.1781	13.1619	14.8039	15.584	15.2821	14.3882	13.3784	12.2353	10.8332
4	-0.00147046	-0.082369	-0.27014	-0.541264	-0.872218	-1.23936	-1.60767	-1.92178	-2.15868	-2.41764	-2.80569	-3.28677	-3.76551	-4.23198	-4.7486	-5.32058	-5.85742	-6.32677	-6.90657	-7.75166	-8.59741	-9.05399	-9.37005	-10.2728	-11.8371	-13.178	-13.6968	-13.8069	-13.9887	-14.0978	-13.783	-12.9006	-11.4486	-9.33439	-6.34494	-2.51358	1.4906	5.03344	8.15552	11.0909	13.8457	16.2808	18.1637	19.1562	19.122	18.389	17.2863	15.8647	14.1179
5	0.0306788	-0.187159	-0.458676	-0.777543	-1.13743	-1.53181	-1.9355	-2.28995	-2.57049	-2.88494	-3.34714	-3.89832	-4.40928	-4.8726	-5.38422	-5.97386	-6.55957	-7.11192	-7.79887	-8.76339	-9.73323	-10.3137	-10.7635	-11.8313	-13.5857	-15.0959	-15.7284	-15.9015	-16.1028	-16.1647	-15.7106	-14.6714	-13.1837	-11.099	-7.89359	-3.45207	1.25835	5.31603	8.87787	12.396	15.8013	18.7045	20.8408	22.0972	22.4339	21.9554	20.7934	19.1166	17.1053
6	0.0360984	-0.268286	-0.614271	-0.99578	-1.40674	-1.84091	-2.27864	-2.67618	-3.01878	-3.40334	-3.92872	-4.5252	-5.05461	-5.50477	-5.97072	-6.50503	-7.08639	-7.71591	-8.48633	-9.46558	-10.4426	-11.1289	-11.7476	-12.9039	-14.6366	-16.1523	-16.9048	-17.2228	-17.4917	-17.5439	-17.0395	-15.9548	-14.4753	-12.4197	-9.12575	-4.40525	0.665195	5.05893	8.99237	13.0134	16.9724	20.2945	22.6911	24.2154	24.8966	24.6658	23.5037	21.6743	19.5061
7	0.0894052	-0.241334	-0.613115	-1.02805	-1.48824	-1.99554	-2.52878	-3.02551	-3.45262	-3.89609	-4.44835	-5.05421	-5.59819	-6.06725	-6.53585	-7.05394	-7.62755	-8.27053	-9.0337	-9.9506	-10.8947	-11.6946	-12.4643	-13.5315	-14.9069	-16.1355	-16.9019	-17.3829	-17.7757	-17.9022	-17.4688	-16.4183	-14.8508	-12.6376	-9.34914	-4.88974	-0.0484929	4.42385	8.66339	13.0345	17.3129	20.9173	23.5565	25.2846	26.1325	26.0354	24.9741	23.1941	21.003
8	0.107242	-0.198489	-0.559751	-0.985475	-1.4846	-2.06565	-2.69997	-3.2924	-3.78194	-4.25342	-4.80642	-5.41076	-5.98195	-6.50325	-7.01583	-7.5494	-8.11224	-8.72027	-9.41965	-10.248	-11.1484	-12.0311	-12.88	-13.7347	-14.591	-15.3787	-16.0478	-16.6184	-17.0917	-17.2862	-16.9639	-15.9899	-14.3015	-11.8631	-8.67272	-4.8151	-0.585257	3.73898	8.13216	12.6223	16.9417	20.6446	23.458	25.3147	26.1953	26.1614	25.2964	23.7349	21.6317
9	-0.0799879	-0.329895	-0.686297	-1.13547	-1.66371	-2.25701	-2.87671	-3.43997	-3.89992	-4.35361	-4.91152	-5.54774	-6.17776	-6.76146	-7.29718	-7.80247	-8.32377	-8.90516	-9.57511	-10.351	-11.198	-12.0594	-12.8625	-13.5241	-14.0402	-14.5219	-15.0395	-15.5241	-15.8772	-15.9684	-15.6538	-14.7591	-13.0941	-10.6528	-7.66905	-4.3238	-0.626029	3.41765	7.67801	11.9803	16.076	19.6724	22.5275	24.4599	25.3936	25.4806	24.8736	23.5898	21.6335
10	-0.448371	-0.652513	-1.0266	-1.51361	-2.05648	-2.5983	-3.09363	-3.51748	-3.87699	-4.2856	-4.85855	-5.55047	-6.24626	-6.87096	-7.38511	-7.80985	-8.26187	-8.83386	-9.51564	-10.2734	-11.0508	-11.7844	-12.4319	-12.9685	-13.402	-13.7869	-14.145	-14.396	-14.4514	-14.2775	-13.8497	-13.0155	-11.5383	-9.36115	-6.66266	-3.59252	-0.18867	3.51065	7.3782	11.2563	14.9619	18.2964	21.0504	23.0032	24.0475	24.3303	23.9894	22.9659	21.182
11	-0.75863	-0.990065	-1.39299	-1.89631	-2.42889	-2.91997	-3.32892	-3.6691	-3.97961	-4.37115	-4.94798	-5.64988	-6.3455	-6.94938	-7.41668	-7.77527	-8.16774	-8.70296	-9.35092	-10.0518	-10.7293	-11.3055	-11.778	-12.2015	-12.5957	-12.9274	-13.1505	-13.1934	-12.9972	-12.6002	-12.0619	-11.2679	-9.98673	-8.11053	-5.6957	-2.83186	0.3356	3.66593	7.08561	10.5353	13.8762	16.9204	19.4798	21.3679	22.4859	22.9316	22.7902	21.971	20.3724
12	-0.890678	-1.23788	-1.66714	-2.14527	-2.63907	-3.11545	-3.55191	-3.94484	-4.3105	-4.72871	-5.2761	-5.90174	-6.50027	-7.01458	-7.42967	-7.77182	-8.13149	-8.57918	-9.10418	-9.67441	-10.2225	-10.6718	-11.0173	-11.309	-11.57	-11.7833	-11.9123	-11.8758	-11.6048	-11.1466	-10.5771	-9.80546	-8.62772	-6.93614	-4.75086	-2.14108	0.722796	3.68334	6.72832	9.87629	12.9764	15.7744	18.0863	19.8115	20.8993	21.3996	21.3486	20.6619	19.254
13	-0.999664	-1.46368	-1.9015	-2.33066	-2.7687	-3.23294	-3.71932	-4.18558	-4.60524	-5.022	-5.48566	-5.97611	-6.44344	-6.86419	-7.23781	-7.57401	-7.89783	-8.23452	-8.60577	-9.02419	-9.44788	-9.81507	-10.0922	-10.2682	-10.3606	-10.4274	-10.4873	-10.4395	-10.1844	-9.74772	-9.1888	-8.42943	-7.29827	-5.71429	-3.71635	-1.38072	1.14298	3.72758	6.41788	9.29015	12.1653	14.7102	16.7361	18.2264	19.1847	19.6371	19.596	18.9989	17.7872
14	-1.22465	-1.72653	-2.14542	-2.52378	-2.90402	-3.32818	-3.79961	-4.25247	-4.63465	-4.96814	-5.28972	-5.62413	-5.98884	-6.3691	-6.72293	-7.02636	-7.28585	-7.51802	-7.763	-8.0576	-8.38719	-8.71459	-8.97378	-9.07841	-9.03173	-8.96718	-8.96033	-8.89616	-8.6496	-8.22846	-7.67884	-6.93029	-5.83405	-4.33489	-2.50124	-0.425339	1.76178	3.96027	6.2593	8.7805	11.341	13.5739	15.2887	16.5046	17.2553	17.5812	17.5077	16.9886	15.9762
15	-1.48808	-1.95591	-2.3433	-2.68857	-3.03004	-3.40566	-3.81788	-4.2057	-4.51719	-4.756	-4.94423	-5.1489	-5.45137	-5.83024	-6.17695	-6.43155	-6.61676	-6.76471	-6.91384	-7.1	-7.33438	-7.6127	-7.84711	-7.88823	-7.72147	-7.52924	-7.42743	-7.3026	-7.02415	-6.59249	-6.04621	-5.31469	-4.25447	-2.83118	-1.15407	0.662247	2.51381	4.33324	6.23097	8.3465	10.5161	12.3926	13.7936	14.7328	15.2514	15.4276	15.321	14.8846	14.0571
16	-1.66955	-2.06289	-2.42591	-2.7711	-3.11098	-3.45788	-3.81128	-4.14754	-4.4404	-4.66275	-4.80121	-4.94533	-5.22214	-5.60676	-5.94539	-6.15751	-6.28697	-6.37984	-6.45371	-6.52362	-6.62418	-6.78966	-6.93166	-6.87044	-6.57625	-6.23942	-5.98955	-5.73789	-5.37672	-4.90738	-4.36129	-3.65668	-2.63699	-1.28584	0.229104	1.76545	3.2748	4.74526	6.27737	7.98499	9.73434	11.2416	12.3477	13.0428	13.362	13.423	13.3183	12.9775	12.3008
17	-1.78056	-2.10227	-2.4526	-2.81323	-3.16586	-3.49234	-3.79001	-4.08387	-4.38337	-4.63268	-4.78047	-4.91571	-5.18092	-5.55475	-5.87671	-6.06479	-6.17019	-6.23938	-6.26591	-6.24134	-6.21206	-6.23743	-6.24329	-6.05549	-5.64012	-5.16945	-4.76693	-4.37399	-3.91402	-3.38845	-2.81843	-2.1205	-1.14267	0.115898	1.45794	2.73333	3.94269	5.11879	6.34008	7.68298	9.04092	10.1964	11.0232	11.504	11.6718	11.6582	11.5648	11.2992	10.7332
18	-1.89932	-2.1994	-2.54512	-2.9032	-3.24036	-3.52364	-3.75035	-3.97194	-4.22112	-4.44419	-4.58529	-4.71443	-4.95045	-5.27868	-5.57103	-5.75903	-5.87585	-5.95096	-5.97322	-5.93056	-5.85657	-5.7961	-5.6889	-5.39618	-4.89943	-4.35679	-3.88112	-3.41984	-2.90192	-2.31563	-1.66651	-0.91009	0.0304798	1.14352	2.30154	3.40284	4.42947	5.38965	6.35958	7.42094	8.47814	9.32863	9.87634	10.1518	10.2094	10.1411	10.0127	9.7506	9.25686
19	-2.0332	-2.35257	-2.69627	-3.03178	-3.32654	-3.54835	-3.69605	-3.82404	-3.97224	-4.10876	-4.1974	-4.28795	-4.46361	-4.71729	-4.96514	-5.15586	-5.29457	-5.38883	-5.43794	-5.4404	-5.40014	-5.3196	-5.1468	-4.78987	-4.25833	-3.7095	-3.24906	-2.80553	-2.28645	-1.65564	-0.90013	-0.0467018	0.851218	1.77334	2.74304	3.75121	4.70025	5.51301	6.28559	7.1484	8.00286	8.61309	8.90551	8.9987	8.98567	8.87796	8.67306	8.3546	7.90784
20	-2.11838	-2.43294	-2.76992	-3.09223	-3.36279	-3.54491	-3.63821	-3.70725	-3.79858	-3.87091	-3.87754	-3.87595	-3.96474	-4.14478	-4.33372	-4.4826	-4.60033	-4.69621	-4.76416	-4.79433	-4.77189	-4.6783	-4.46883	-4.08041	-3.54053	-3.00805	-2.58476	-2.18386	-1.69523	-1.06326	-0.260418	0.630779	1.455	2.18837	2.97949	3.89583	4.77341	5.46365	6.07763	6.7847	7.4874	7.92866	8.05128	8.0344	7.99374	7.87357	7.61585	7.25699	6.85611
21	-2.12271	-2.37737	-2.69839	-3.02835	-3.30986	-3.48613	-3.55592	-3.61741	-3.73354	-3.80566	-3.72686	-3.59423	-3.58655	-3.71266	-3.83679	-3.89266	-3.93311	-3.99843	-4.05544	-4.06105	-4.00161	-3.87312	-3.63959	-3.24211	-2.70773	-2.18846	-1.78277	-1.41175	-0.971799	-0.394913	0.363019	1.20228	1.92791	2.51251	3.14861	3.93402	4.69313	5.26177	5.74795	6.32274	6.89958	7.23782	7.29135	7.24406	7.20688	7.09881	6.84305	6.49873	6.15432
22	-2.07968	-2.2573	-2.55403	-2.88744	-3.17515	-3.3356	-3.36717	-3.41118	-3.55587	-3.64841	-3.52189	-3.30027	-3.22507	-3.31306	-3.38979	-3.37423	-3.3454	-3.36495	-3.39439	-3.3805	-3.30229	-3.15043	-2.89683	-2.50033	-1.98902	-1.4914	-1.09562	-0.75475	-0.394031	0.0862184	0.7791	1.57929	2.24899	2.74089	3.25843	3.9136	4.54809	5.0118	5.40774	5.89705	6.39479	6.66901	6.67824	6.60606	6.56181	6.4606	6.22299	5.91267	5.6224
23	-2.01799	-2.13612	-2.4019	-2.71396	-2.97092	-3.07251	-3.01874	-2.98901	-3.1024	-3.19761	-3.09014	-2.88334	-2.79832	-2.85919	-2.92224	-2.91304	-2.87718	-2.85883	-2.8635	-2.88178	-2.85661	-2.71523	-2.43618	-2.03802	-1.56726	-1.10934	-0.729785	-0.429925	-0.177249	0.19107	0.86036	1.70829	2.40568	2.86248	3.30461	3.86863	4.41499	4.8092	5.15817	5.62164	6.09611	6.32129	6.25456	6.11033	6.01983	5.89603	5.65513	5.36089	5.10631
24	-1.92084	-1.99063	-2.22107	-2.49826	-2.70835	-2.7387	-2.59155	-2.47464	-2.53536	-2.63126	-2.58709	-2.46048	-2.40615	-2.45233	-2.51911	-2.55465	-2.55789	-2.54239	-2.55355	-2.62339	-2.65622	-2.51396	-2.18889	-1.77329	-1.3392	-0.925717	-0.568455	-0.300527	-0.119379	0.180083	0.845183	1.7382	2.46193	2.89681	3.29052	3.80195	4.30669	4.68048	5.02121	5.47402	5.9266	6.11363	5.99438	5.79311	5.64981	5.48275	5.2122	4.90269	4.64734
25	-1.76817	-1.78639	-1.97943	-2.22539	-2.40239	-2.38987	-2.19089	-2.02962	-2.0711	-2.18905	-2.21773	-2.17711	-2.16629	-2.21202	-2.27907	-2.34298	-2.39984	-2.45316	-2.52388	-2.61923	-2.63451	-2.43095	-2.02954	-1.57322	-1.15129	-0.771024	-0.437836	-0.16978	0.0412611	0.366551	1.00932	1.83636	2.48823	2.86684	3.21943	3.70678	4.21607	4.62638	4.98951	5.39676	5.76948	5.92816	5.84623	5.67753	5.51663	5.303	4.9823	4.62264	4.31646
26	-1.59896	-1.56127	-1.7169	-1.93883	-2.10006	-2.07499	-1.86512	-1.69948	-1.74873	-1.89256	-1.96854	-1.97949	-1.99949	-2.05275	-2.12081	-2.19776	-2.30004	-2.43438	-2.57031	-2.66284	-2.62	-2.34111	-1.87704	-1.39387	-0.98453	-0.63202	-0.31505	-0.0243577	0.261499	0.646029	1.24405	1.93999	2.46435	2.76567	3.07964	3.55831	4.09693	4.57265	4.9714	5.31001	5.5654	5.69104	5.68496	5.59757	5.4537	5.21457	4.85357	4.43809	4.05568
27	-1.47708	-1.38448	-1.50462	-1.70693	-1.86083	-1.83716	-1.63331	-1.47324	-1.52331	-1.66202	-1.72713	-1.7267	-1.74205	-1.80108	-1.88582	-1.98633	-2.108	-2.24885	-2.37935	-2.45813	-2.4018	-2.12015	-1.67232	-1.23063	-0.877708	-0.562482	-0.24293	0.0683373	0.365187	0.733363	1.27539	1.88863	2.33373	2.57737	2.85735	3.32797	3.88968	4.4161	4.84271	5.12922	5.28605	5.35466	5.36095	5.31198	5.1991	4.98095	4.62936	4.1955	3.75293
28	-1.40847	-1.26919	-1.35863	-1.5436	-1.69089	-1.66866	-1.46976	-1.31014	-1.34829	-1.45661	-1.47	-1.41502	-1.40003	-1.46094	-1.57136	-1.69994	-1.81054	-1.88119	-1.93578	-1.99178	-1.96603	-1.74572	-1.3766	-1.02445	-0.754346	-0.481438	-0.153178	0.159693	0.396077	0.673601	1.15362	1.74064	2.16691	2.38438	2.63471	3.07988	3.63445	4.1798	4.62197	4.88308	4.97708	4.9744	4.92541	4.85588	4.76534	4.59792	4.30463	3.90144	3.431
29	-1.3468	-1.17797	-1.24517	-1.41357	-1.54838	-1.51615	-1.30894	-1.14335	-1.17643	-1.27105	-1.2537	-1.16396	-1.13168	-1.19527	-1.3145	-1.44111	-1.51801	-1.51546	-1.49234	-1.50463	-1.4761	-1.28765	-0.970292	-0.668838	-0.436277	-0.188814	0.120642	0.406381	0.593981	0.806753	1.2187	1.74934	2.14702	2.35579	2.57832	2.96001	3.45985	3.99938	4.45491	4.70084	4.7492	4.69661	4.60829	4.51104	4.41038	4.26909	4.04568	3.70524	3.23271
30	-1.2518	-1.07703	-1.12981	-1.27821	-1.39027	-1.33545	-1.11008	-0.937524	-0.979033	-1.09172	-1.09461	-1.02361	-1.00638	-1.07498	-1.17936	-1.27095	-1.30766	-1.26945	-1.20374	-1.15538	-1.06637	-0.845291	-0.517261	-0.195899	0.0668917	0.311612	0.565519	0.798539	0.987494	1.20618	1.55121	1.96791	2.29988	2.50705	2.70314	2.98623	3.38959	3.90617	4.37435	4.60241	4.60827	4.53789	4.46112	4.35651	4.21301	4.05435	3.8874	3.62171	3.16632
31	-1.09664	-0.941698	-0.980041	-1.09614	-1.17448	-1.10079	-0.876881	-0.712248	-0.758947	-0.888744	-0.936096	-0.918988	-0.933615	-1.00519	-1.09789	-1.17351	-1.19315	-1.13655	-1.04226	-0.948036	-0.811149	-0.562553	-0.221735	0.12429	0.42097	0.663165	0.858199	1.03754	1.23515	1.47521	1.77445	2.09826	2.37771	2.58783	2.76178	2.95427	3.26406	3.74787	4.21395	4.41612	4.37842	4.28932	4.22211	4.11254	3.93334	3.75718	3.63148	3.42882	3.00467
32	-0.874489	-0.760412	-0.778282	-0.846365	-0.882925	-0.807161	-0.623944	-0.491439	-0.526889	-0.645877	-0.733688	-0.782146	-0.829974	-0.901116	-1.00616	-1.12051	-1.16366	-1.08738	-0.96097	-0.859068	-0.740913	-0.525445	-0.219706	0.101785	0.384943	0.607728	0.767962	0.912135	1.08978	1.31926	1.60496	1.91469	2.19167	2.40603	2.56367	2.70645	2.96007	3.40728	3.84666	4.0127	3.92916	3.79604	3.69558	3.56927	3.39239	3.23348	3.13534	2.96786	2.5839
33	-0.641175	-0.562324	-0.556241	-0.576735	-0.577611	-0.513224	-0.387942	-0.295627	-0.309646	-0.397684	-0.507187	-0.60924	-0.68772	-0.765355	-0.896972	-1.06736	-1.1471	-1.05691	-0.907918	-0.823118	-0.759054	-0.612027	-0.373587	-0.108397	0.134437	0.331005	0.47395	0.596793	0.739408	0.937283	1.21916	1.54721	1.83855	2.05036	2.19308	2.31276	2.53537	2.94404	3.3414	3.46653	3.34059	3.15705	3.00853	2.86669	2.71802	2.59741	2.5184	2.36857	2.02803
34	-0.465587	-0.385091	-0.355915	-0.349488	-0.337239	-0.290906	-0.210155	-0.144638	-0.137363	-0.189342	-0.289816	-0.409808	-0.514908	-0.618736	-0.774917	-0.966062	-1.05861	-0.972614	-0.830081	-0.766094	-0.742433	-0.656952	-0.488686	-0.279231	-0.0679536	0.111338	0.240853	0.346487	0.46288	0.631293	0.889488	1.20009	1.47479	1.66813	1.79168	1.89076	2.08551	2.45466	2.80799	2.89454	2.73677	2.52432	2.3553	2.21783	2.10212	2.01704	1.95476	1.82089	1.52115
35	-0.416616	-0.266371	-0.219299	-0.226861	-0.240514	-0.212136	-0.131864	-0.0582999	-0.0401813	-0.0660284	-0.114794	-0.193387	-0.319592	-0.482092	-0.644609	-0.768629	-0.813336	-0.761999	-0.674441	-0.613898	-0.56791	-0.494873	-0.37031	-0.183694	0.0403673	0.227071	0.333366	0.416187	0.539045	0.703283	0.888368	1.0776	1.25682	1.40667	1.50111	1.55799	1.70603	2.0357	2.35625	2.41365	2.24175	2.04981	1.93023	1.8357	1.7366	1.66041	1.61851	1.51479	1.24736
36	-0.563153	-0.243819	-0.188392	-0.271092	-0.366139	-0.348844	-0.194351	-0.0564379	-0.0482462	-0.0729203	-0.015342	0.0304883	-0.109826	-0.376254	-0.510657	-0.427063	-0.326406	-0.352559	-0.387981	-0.292436	-0.112348	0.0395577	0.176234	0.405238	0.721995	0.956547	1.01618	1.06087	1.24675	1.45525	1.48823	1.38402	1.34105	1.4133	1.46303	1.43199	1.49249	1.78369	2.09601	2.14078	1.9796	1.8855	1.92764	1.93333	1.81337	1.69561	1.68375	1.64019	1.39076
[truncated: 22 more columns]
