# Supplementary material for: Strong confinement of active microalgae leads to inversion of vortex flow and enhanced mixing
Source: eLife. 2021 Nov 22;10:e67663. doi: 10.7554/eLife.67663 (PMC8758135; doi:10.7554/eLife.67663)
Supplement: Figure 3—source data 2. [file elife-67663-fig3-data2.xlsx]

## Sheet: Sheet1
Figure 3C: Experimental flow field of strongly confined cells (H10 Synchronous or equivalently H10)
Beat averaged flow field of a representative H10 cell, averaged over approximately 328 beat cycles.
The [X,Y] meshgrid for flow-field plots ranges from -33 to 37 micron in X and -37 to 36 micron in Y. Gridsize is 1 micron. i.e. [X,Y] = meshgrid [-33:1:37,-37:1:36] micron.
Cell centre is at the origin of this meshgrid i.e. at [0,0].
All velocities in the following datasets are in micron/s
X-component of velocity field (v_x) for H10
Y↓ & X→	-33	-32	-31	-30	-29	-28	-27	-26	-25	-24	-23	-22	-21	-20	-19	-18	-17	-16	-15	-14	-13	-12	-11	-10	-9	-8	-7	-6	-5	-4	-3	-2	-1	0	1	2	3	4	5	6	7	8	9	10	11	12	13	14	15
-37	-0.378414	-0.169139	-0.0902031	-0.0890344	-0.113062	-0.109991	-0.0528017	0.0402946	0.152605	0.28948	0.454446	0.601438	0.667916	0.692583	0.799358	1.01997	1.2336	1.35996	1.48986	1.72186	1.98601	2.1536	2.2251	2.29975	2.4359	2.62924	2.87261	3.16455	3.50018	3.84932	4.17513	4.47111	4.7518	5.03265	5.32964	5.6364	5.89061	6.03349	6.06809	6.01592	5.88606	5.68159	5.45977	5.34092	5.36152	5.36285	5.20463	4.94887	4.70762
-36	-0.312849	-0.151453	-0.116183	-0.143982	-0.171794	-0.137089	-0.0254847	0.091246	0.165263	0.265384	0.464989	0.680024	0.766151	0.759824	0.850267	1.09316	1.3217	1.42022	1.49746	1.67883	1.91135	2.07865	2.18489	2.3258	2.53436	2.7495	2.9375	3.16179	3.48395	3.85798	4.2049	4.51508	4.82643	5.15641	5.49471	5.82379	6.1127	6.32893	6.44247	6.42971	6.32888	6.21568	6.1342	6.09083	6.07308	6.03109	5.92245	5.76109	5.57631
-35	-0.33173	-0.174011	-0.163968	-0.222018	-0.268577	-0.224784	-0.0779491	0.0662231	0.1362	0.225324	0.436789	0.676413	0.773508	0.767578	0.875746	1.15936	1.42025	1.5218	1.59515	1.79217	2.05727	2.26063	2.40463	2.59204	2.85404	3.11465	3.33343	3.59287	3.97224	4.40925	4.7992	5.14118	5.50496	5.9127	6.32285	6.69763	7.01923	7.26926	7.4109	7.40921	7.31546	7.23249	7.19838	7.17464	7.12763	7.04436	6.91776	6.75513	6.5677
-34	-0.395145	-0.218611	-0.224295	-0.313478	-0.387439	-0.348339	-0.179024	-0.00671249	0.0781408	0.168717	0.372849	0.605753	0.707904	0.723524	0.868853	1.19836	1.49768	1.62198	1.72203	1.96999	2.299	2.55667	2.7411	2.96499	3.26995	3.5907	3.89221	4.24752	4.7238	5.24625	5.69926	6.09376	6.52647	7.02385	7.51887	7.954	8.31107	8.57529	8.71843	8.715	8.61786	8.52655	8.47879	8.43909	8.37241	8.254	8.06945	7.84471	7.61385
-33	-0.463181	-0.267051	-0.287903	-0.408701	-0.512412	-0.483015	-0.297538	-0.0994994	0.00380954	0.0949766	0.276174	0.483194	0.587253	0.635344	0.822645	1.18997	1.52244	1.67805	1.81722	2.12039	2.51179	2.82392	3.05113	3.3112	3.65711	4.04366	4.44564	4.91542	5.49735	6.1121	6.64635	7.11719	7.63	8.21219	8.78756	9.28898	9.68911	9.96781	10.1101	10.1077	10.0081	9.89239	9.80189	9.73091	9.65462	9.51137	9.25641	8.94359	8.64682
-32	-0.495926	-0.301129	-0.345528	-0.498025	-0.627525	-0.604074	-0.40232	-0.184076	-0.0740702	0.00351704	0.149769	0.323885	0.429468	0.510719	0.730179	1.11399	1.46297	1.64732	1.8198	2.15148	2.57085	2.91951	3.1915	3.49721	3.89055	4.33952	4.82553	5.38628	6.05164	6.74992	7.3817	7.95583	8.55462	9.20005	9.83375	10.3986	10.8543	11.1676	11.3309	11.3478	11.2583	11.1245	10.9942	10.8969	10.8215	10.6678	10.3575	9.96551	9.59868
-31	-0.462806	-0.308161	-0.391548	-0.575151	-0.721154	-0.693007	-0.470288	-0.240357	-0.147694	-0.108088	-0.00529397	0.138939	0.247306	0.353135	0.582867	0.951699	1.29127	1.49101	1.67464	1.98323	2.37091	2.72455	3.0432	3.41144	3.86474	4.3645	4.88956	5.48369	6.18639	6.94749	7.68935	8.39232	9.07662	9.75099	10.4082	11.0271	11.5541	11.9378	12.1635	12.2309	12.174	12.0478	11.9067	11.804	11.7391	11.5914	11.263	10.8294	10.4042
-30	-0.40686	-0.318945	-0.449041	-0.660315	-0.815933	-0.780416	-0.542147	-0.311137	-0.248049	-0.256785	-0.203172	-0.0923561	0.0128272	0.133015	0.359131	0.696152	1.00733	1.20157	1.37193	1.62885	1.96026	2.30904	2.6779	3.11485	3.6276	4.16402	4.69929	5.2983	6.02462	6.84447	7.6906	8.51109	9.26573	9.95354	10.6243	11.2967	11.9041	12.3755	12.6859	12.8278	12.8259	12.7253	12.5852	12.4801	12.4221	12.2824	11.9516	11.4957	11.0194
-29	-0.402927	-0.3827	-0.552973	-0.784735	-0.948973	-0.918008	-0.686254	-0.46659	-0.423036	-0.465767	-0.464322	-0.403846	-0.318442	-0.192067	0.0333378	0.346972	0.625209	0.788175	0.925952	1.14658	1.45757	1.82796	2.25261	2.74587	3.29654	3.8559	4.40846	5.04018	5.83202	6.73488	7.65565	8.53225	9.32534	10.0438	10.7585	11.4996	12.1847	12.7276	13.1094	13.3329	13.403	13.3275	13.1639	13.0273	12.9549	12.8032	12.4458	11.9473	11.415
-28	-0.466726	-0.506625	-0.705476	-0.949184	-1.12365	-1.11598	-0.921707	-0.730493	-0.692479	-0.746161	-0.791643	-0.792107	-0.738382	-0.610468	-0.379879	-0.0766943	0.174478	0.298278	0.401436	0.60928	0.935295	1.34884	1.82875	2.36111	2.92694	3.49972	4.08523	4.78148	5.67293	6.67401	7.64539	8.53585	9.35576	10.1351	10.9275	11.7453	12.4933	13.0791	13.5079	13.8108	13.9644	13.9144	13.7088	13.5147	13.4024	13.2103	12.7943	12.2312	11.6456
-27	-0.560716	-0.659998	-0.879063	-1.12703	-1.31301	-1.34703	-1.2229	-1.08431	-1.05037	-1.0978	-1.172	-1.22013	-1.19165	-1.06208	-0.82989	-0.538395	-0.301764	-0.187036	-0.0925808	0.101992	0.423464	0.859928	1.38108	1.94287	2.51761	3.10182	3.71998	4.46963	5.43002	6.50209	7.53176	8.47474	9.36285	10.2283	11.1015	11.9775	12.7615	13.3686	13.831	14.208	14.4505	14.4457	14.2235	13.9807	13.8106	13.5535	13.0683	12.4498	11.8401
-26	-0.659935	-0.81347	-1.04764	-1.29755	-1.49829	-1.58557	-1.54991	-1.47994	-1.45578	-1.49128	-1.57837	-1.65579	-1.64166	-1.51112	-1.28849	-1.02081	-0.789085	-0.642964	-0.523671	-0.354522	-0.0809715	0.338183	0.877048	1.45884	2.04233	2.63963	3.28415	4.05738	5.0254	6.11725	7.2181	8.27741	9.2894	10.2591	11.2045	12.1155	12.9111	13.5234	14.0103	14.4551	14.7883	14.8503	14.6461	14.3744	14.1383	13.8032	13.2531	12.6015	12.0017
-25	-0.763991	-0.942325	-1.18927	-1.45173	-1.67658	-1.81113	-1.84125	-1.82175	-1.81017	-1.84825	-1.96114	-2.07722	-2.08643	-1.96596	-1.76768	-1.54011	-1.32248	-1.14218	-0.991999	-0.849211	-0.634582	-0.253668	0.27699	0.856461	1.43589	2.04478	2.72179	3.5141	4.45904	5.52883	6.67245	7.83872	8.97693	10.0596	11.0894	12.0476	12.8569	13.4609	13.9548	14.4622	14.8888	15.0111	14.8078	14.4959	14.1979	13.7949	13.1868	12.505	11.916
-24	-0.873152	-1.03563	-1.29527	-1.58716	-1.84643	-2.00868	-2.05438	-2.04426	-2.04445	-2.11059	-2.279	-2.46034	-2.51569	-2.42433	-2.26634	-2.09489	-1.91467	-1.73216	-1.57332	-1.45238	-1.28264	-0.945517	-0.450926	0.0936021	0.644738	1.25551	1.97044	2.78923	3.7056	4.7241	5.85004	7.04894	8.25928	9.43679	10.5603	11.5885	12.4262	13.0114	13.494	14.0623	14.5861	14.7461	14.4991	14.1281	13.7988	13.3735	12.7327	12.0217	11.4266
-23	-0.981931	-1.12706	-1.39985	-1.71979	-2.00637	-2.17969	-2.21707	-2.19818	-2.20682	-2.30372	-2.52568	-2.7702	-2.8801	-2.83403	-2.72641	-2.61417	-2.48796	-2.34455	-2.21881	-2.13649	-2.0153	-1.73794	-1.31002	-0.830504	-0.332941	0.247028	0.954664	1.76029	2.62998	3.58043	4.6423	5.79386	6.97749	8.14832	9.27898	10.3187	11.1552	11.7183	12.1994	12.8363	13.4625	13.6713	13.4103	13.0451	12.7882	12.457	11.8845	11.2139	10.6406
-22	-1.08598	-1.25397	-1.54086	-1.86851	-2.15879	-2.33421	-2.37376	-2.35755	-2.37033	-2.47604	-2.7152	-2.9891	-3.14386	-3.153	-3.09875	-3.03606	-2.97046	-2.90759	-2.86751	-2.86024	-2.81218	-2.62308	-2.29467	-1.90626	-1.48716	-0.991532	-0.38469	0.320414	1.10636	1.97769	2.94337	3.96884	4.99016	5.97438	6.92954	7.83406	8.58558	9.11962	9.62754	10.3435	11.0768	11.385	11.2234	11.0165	11.0022	10.9431	10.613	10.126	9.66041
-21	-1.1971	-1.41486	-1.71892	-2.04616	-2.33342	-2.51806	-2.5825	-2.58979	-2.6108	-2.71462	-2.95136	-3.23428	-3.42155	-3.48187	-3.47842	-3.46251	-3.46154	-3.49364	-3.55448	-3.62889	-3.6596	-3.577	-3.3784	-3.11217	-2.8009	-2.42808	-1.97492	-1.42494	-0.767936	-0.0278144	0.758458	1.5421	2.26731	2.92276	3.55505	4.17884	4.71934	5.13311	5.60613	6.35919	7.19222	7.65637	7.71068	7.79479	8.145	8.48291	8.53754	8.38553	8.17282
-20	-1.33269	-1.59209	-1.9192	-2.26205	-2.56869	-2.78751	-2.90092	-2.95209	-2.99683	-3.11322	-3.36447	-3.66715	-3.8786	-3.97012	-4.01037	-4.05274	-4.12098	-4.22643	-4.34969	-4.46529	-4.54743	-4.57129	-4.52853	-4.42342	-4.25514	-4.01505	-3.69558	-3.29374	-2.81586	-2.31695	-1.8659	-1.4867	-1.17194	-0.904614	-0.656091	-0.420352	-0.249832	-0.157249	0.0925059	0.770953	1.68169	2.3501	2.70461	3.14917	3.89431	4.6587	5.16826	5.48182	5.72156
-19	-1.48942	-1.7739	-2.13124	-2.50968	-2.85747	-3.12319	-3.28636	-3.38187	-3.46041	-3.60847	-3.8983	-4.23845	-4.4719	-4.57909	-4.65762	-4.7692	-4.91172	-5.0733	-5.22931	-5.35849	-5.47751	-5.61517	-5.75457	-5.84391	-5.8466	-5.74934	-5.55706	-5.32067	-5.10042	-4.96417	-4.97549	-5.10866	-5.27735	-5.44191	-5.62499	-5.85795	-6.18347	-6.58271	-6.71468	-6.18899	-5.19998	-4.29257	-3.59778	-2.75706	-1.5881	-0.363985	0.653285	1.52945	2.38447
-18	-1.64725	-1.95314	-2.34796	-2.76956	-3.15579	-3.44496	-3.61608	-3.72101	-3.82468	-4.01145	-4.34726	-4.72996	-4.99103	-5.11921	-5.23721	-5.41637	-5.63862	-5.87589	-6.09406	-6.2701	-6.46078	-6.7473	-7.09889	-7.39954	-7.58387	-7.66282	-7.67397	-7.71288	-7.8749	-8.1961	-8.68727	-9.30567	-9.97261	-10.6511	-11.3592	-12.1241	-12.9858	-13.9043	-14.4206	-14.01	-12.8905	-11.7269	-10.7047	-9.44134	-7.74949	-5.94962	-4.34523	-2.85342	-1.3303
-17	-1.79092	-2.11372	-2.54917	-3.01497	-3.42878	-3.70897	-3.83711	-3.90789	-4.01976	-4.24296	-4.62072	-5.04283	-5.33955	-5.50311	-5.66372	-5.90084	-6.20531	-6.55097	-6.88339	-7.16211	-7.47367	-7.94395	-8.52686	-9.04581	-9.42254	-9.72565	-10.042	-10.4777	-11.1223	-11.9507	-12.9005	-13.9539	-15.1234	-16.3927	-17.7073	-19.0355	-20.4093	-21.7741	-22.5842	-22.2174	-20.9298	-19.506	-18.1614	-16.4382	-14.124	-11.6399	-9.38386	-7.26376	-5.10428
-16	-1.91316	-2.22574	-2.69465	-3.20878	-3.65703	-3.92927	-4.00637	-4.03199	-4.14354	-4.39648	-4.8098	-5.26747	-5.60202	-5.80567	-6.00673	-6.29171	-6.67288	-7.13528	-7.59909	-7.9983	-8.43971	-9.08514	-9.88512	-10.63	-11.2369	-11.8124	-12.4711	-13.3107	-14.4059	-15.7198	-17.1797	-18.7689	-20.5082	-22.3717	-24.2716	-26.1407	-27.9737	-29.6815	-30.7023	-30.4035	-29.0277	-27.3451	-25.5823	-23.3223	-20.3956	-17.2671	-14.3749	-11.6483	-8.92681
-15	-2.01616	-2.2904	-2.78079	-3.34562	-3.84317	-4.13297	-4.18882	-4.189	-4.30008	-4.57186	-5.01104	-5.49736	-5.86269	-6.09835	-6.33164	-6.65573	-7.10195	-7.66516	-8.24305	-8.74624	-9.29408	-10.0745	-11.053	-12.0255	-12.9063	-13.7858	-14.7627	-15.9199	-17.3326	-19.0497	-21.1016	-23.4078	-25.8123	-28.2162	-30.5969	-32.9215	-35.1194	-37.0454	-38.2057	-38.0576	-36.7411	-34.8108	-32.4911	-29.6136	-26.1688	-22.5514	-19.1261	-15.8757	-12.717
-14	-2.12807	-2.40472	-2.91799	-3.51714	-4.05144	-4.37143	-4.44593	-4.45538	-4.56986	-4.84472	-5.29166	-5.78783	-6.15962	-6.40178	-6.65258	-7.01226	-7.51244	-8.14582	-8.8019	-9.38425	-10.0198	-10.9102	-12.0363	-13.2106	-14.3443	-15.4976	-16.7392	-18.1294	-19.7447	-21.7611	-24.3634	-27.3948	-30.4665	-33.3665	-36.1187	-38.7278	-41.1097	-43.1168	-44.3443	-44.3468	-43.1321	-40.9874	-38.124	-34.6597	-30.7758	-26.8072	-23.0458	-19.4947	-16.1086
-13	-2.27017	-2.65055	-3.20056	-3.80107	-4.33298	-4.67816	-4.81102	-4.87146	-4.99739	-5.25876	-5.68923	-6.16587	-6.50632	-6.71757	-6.96774	-7.36423	-7.90838	-8.57104	-9.25708	-9.89035	-10.6026	-11.5941	-12.8439	-14.1626	-15.4596	-16.7928	-18.2213	-19.7745	-21.5138	-23.7149	-26.6909	-30.2557	-33.8831	-37.2424	-40.2668	-42.9277	-45.2498	-47.2013	-48.4247	-48.4902	-47.3104	-45.0137	-41.7894	-37.8948	-33.6376	-29.4281	-25.6017	-22.0921	-18.7567
-12	-2.39205	-2.90867	-3.49574	-4.08022	-4.58907	-4.94991	-5.14913	-5.27835	-5.43383	-5.68964	-6.09288	-6.52799	-6.81802	-6.9882	-7.23548	-7.66806	-8.24257	-8.90003	-9.57536	-10.2285	-10.9901	-12.0446	-13.3593	-14.7367	-16.0876	-17.4857	-18.9967	-20.6286	-22.4269	-24.7096	-27.8498	-31.6773	-35.6495	-39.354	-42.5577	-45.1506	-47.3001	-49.1277	-50.3048	-50.3876	-49.237	-46.9073	-43.5593	-39.4759	-35.0247	-30.7481	-27.0788	-23.8495	-20.7702
-11	-2.42445	-2.99922	-3.60204	-4.17959	-4.67857	-5.04618	-5.27872	-5.4603	-5.67336	-5.96221	-6.34707	-6.73282	-6.98284	-7.14095	-7.40377	-7.86617	-8.45155	-9.08144	-9.72029	-10.3604	-11.1202	-12.1559	-13.4292	-14.7548	-16.0523	-17.3985	-18.8644	-20.4695	-22.2662	-24.5464	-27.6506	-31.444	-35.4637	-39.293	-42.5841	-45.1514	-47.2035	-48.922	-50.042	-50.1771	-49.1629	-46.9779	-43.7508	-39.7833	-35.4709	-31.3952	-28.0164	-25.1322	-22.3994
-10	-2.41211	-2.95537	-3.5547	-4.14377	-4.65624	-5.02651	-5.25439	-5.45678	-5.733	-6.07691	-6.45434	-6.79674	-7.02758	-7.20182	-7.48542	-7.95087	-8.51479	-9.0992	-9.68763	-10.2886	-10.9952	-11.9244	-13.0472	-14.224	-15.3946	-16.6181	-17.9572	-19.4586	-21.194	-23.3932	-26.3141	-29.849	-33.637	-37.3162	-40.5306	-43.0628	-45.0421	-46.5953	-47.5681	-47.7236	-46.898	-44.9801	-42.0689	-38.5095	-34.7016	-31.137	-28.2004	-25.7387	-23.4787
-9	-2.48055	-2.96294	-3.55865	-4.17429	-4.71648	-5.09281	-5.29925	-5.49	-5.78978	-6.16052	-6.53075	-6.84902	-7.07777	-7.2667	-7.5391	-7.95039	-8.44329	-8.96326	-9.49661	-10.0456	-10.6639	-11.4209	-12.3142	-13.2863	-14.3134	-15.4222	-16.6469	-18.0315	-19.6441	-21.6798	-24.3536	-27.5489	-30.9205	-34.1599	-37.0118	-39.2949	-41.0045	-42.1569	-42.7368	-42.7104	-41.9521	-40.2868	-37.7974	-34.8687	-31.8759	-29.1347	-26.8859	-25.0694	-23.5504
-8	-2.64921	-3.07889	-3.6773	-4.32422	-4.89944	-5.28392	-5.46528	-5.62209	-5.89969	-6.25546	-6.60963	-6.9161	-7.14724	-7.33473	-7.56032	-7.87108	-8.25579	-8.69594	-9.16678	-9.64732	-10.1492	-10.6979	-11.3272	-12.0772	-12.9668	-13.984	-15.119	-16.375	-17.7891	-19.5779	-21.9898	-24.8567	-27.726	-30.3083	-32.5333	-34.3199	-35.5237	-36.0388	-36.0056	-35.6188	-34.8087	-33.3509	-31.3217	-29.1514	-27.1797	-25.4985	-24.1639	-23.2227	-22.7038
-7	-2.78969	-3.17907	-3.77511	-4.43847	-5.02979	-5.41104	-5.56495	-5.69033	-5.94805	-6.28479	-6.60748	-6.88011	-7.09395	-7.2705	-7.45676	-7.68824	-7.98061	-8.33571	-8.71742	-9.0871	-9.43822	-9.78053	-10.1746	-10.719	-11.4527	-12.328	-13.2962	-14.3264	-15.4355	-16.8973	-19.0336	-21.6038	-23.9863	-25.8853	-27.4384	-28.6873	-29.3628	-29.2506	-28.6613	-28.0275	-27.2938	-26.1141	-24.5484	-23.1365	-22.223	-21.6568	-21.2867	-21.2643	-21.7858
-6	-2.81723	-3.18426	-3.76776	-4.42205	-5.00142	-5.36162	-5.48911	-5.60424	-5.87787	-6.21899	-6.49494	-6.69428	-6.85927	-7.02144	-7.2028	-7.41689	-7.66415	-7.93461	-8.18923	-8.39115	-8.5547	-8.71649	-8.94059	-9.3109	-9.84848	-10.4829	-11.1495	-11.8194	-12.5231	-13.5972	-15.433	-17.7242	-19.6933	-21.0279	-22.0316	-22.8482	-23.1191	-22.5587	-21.6457	-21.0333	-20.6198	-19.8523	-18.7536	-18.0267	-18.0702	-18.5177	-19.0276	-19.8374	-21.2827
-5	-2.79063	-3.16892	-3.74465	-4.37885	-4.93256	-5.26829	-5.38182	-5.50748	-5.81763	-6.17695	-6.40812	-6.52745	-6.63512	-6.77992	-6.96612	-7.18314	-7.39877	-7.5775	-7.67967	-7.67766	-7.62785	-7.6178	-7.69889	-7.89391	-8.18897	-8.51832	-8.82813	-9.10931	-9.41381	-10.0998	-11.5772	-13.516	-15.0875	-15.9762	-16.5459	-16.9786	-16.888	-15.9752	-14.8313	-14.2486	-14.1189	-13.7939	-13.2526	-13.2162	-14.0709	-15.3615	-16.6724	-18.2814	-20.5825
-4	-2.77546	-3.20623	-3.79222	-4.41172	-4.94307	-5.26596	-5.3866	-5.53755	-5.88283	-6.25973	-6.46522	-6.53334	-6.6	-6.72377	-6.89648	-7.09091	-7.25277	-7.32798	-7.27087	-7.05635	-6.78243	-6.58926	-6.51034	-6.49711	-6.50856	-6.51764	-6.50674	-6.48163	-6.49566	-6.85215	-7.89444	-9.33474	-10.4594	-10.9863	-11.2044	-11.2472	-10.7636	-9.49839	-8.06033	-7.26065	-7.11287	-7.1475	-7.3107	-8.04245	-9.55457	-11.4873	-13.5308	-15.9491	-19.089
-3	-2.7466	-3.2266	-3.82746	-4.44204	-4.96319	-5.28506	-5.41999	-5.59177	-5.95498	-6.34069	-6.54129	-6.59335	-6.6382	-6.73577	-6.87564	-7.02591	-7.12381	-7.10541	-6.91196	-6.51018	-6.02618	-5.63946	-5.37455	-5.13744	-4.87633	-4.60478	-4.34056	-4.09896	-3.92369	-4.02443	-4.63398	-5.52279	-6.14978	-6.30959	-6.24082	-6.02524	-5.27863	-3.7203	-1.9608	-0.834823	-0.527282	-0.823416	-1.65575	-3.13562	-5.25822	-7.73682	-10.3587	-13.417	-17.2634
-2	-2.65689	-3.12747	-3.72766	-4.34712	-4.87551	-5.20378	-5.34109	-5.50812	-5.85977	-6.2396	-6.45164	-6.51825	-6.55618	-6.62166	-6.71844	-6.82363	-6.87431	-6.80107	-6.5255	-5.99562	-5.34336	-4.76365	-4.29406	-3.85164	-3.39196	-2.93073	-2.48968	-2.09419	-1.78677	-1.70457	-1.98995	-2.41847	-2.52159	-2.21235	-1.90534	-1.73731	-1.06718	0.625508	2.63924	3.95165	4.28189	3.80679	2.58338	0.521319	-2.29237	-5.35618	-8.30054	-11.6038	-15.869
-1	-2.56002	-2.98586	-3.57629	-4.20748	-4.75559	-5.09812	-5.23423	-5.38084	-5.6963	-6.05101	-6.27481	-6.36946	-6.41223	-6.45278	-6.51636	-6.59534	-6.63051	-6.54923	-6.2513	-5.66197	-4.90727	-4.18433	-3.55152	-2.96064	-2.38035	-1.80769	-1.25016	-0.738325	-0.318885	-0.108152	-0.216587	-0.361149	-0.000913646	0.839574	1.39549	1.37364	1.78289	3.49594	5.67453	7.02759	7.26266	6.69932	5.36276	2.9247	-0.57455	-4.22726	-7.32673	-10.6024	-15.0328
0	-2.57251	-2.99168	-3.58658	-4.23134	-4.80007	-5.16816	-5.32526	-5.46552	-5.73629	-6.04357	-6.25652	-6.36779	-6.42497	-6.46949	-6.53675	-6.62718	-6.68524	-6.6368	-6.36482	-5.77805	-5.00771	-4.26377	-3.6019	-2.95945	-2.30259	-1.6435	-0.998534	-0.385617	0.156372	0.469762	0.396303	0.313785	0.951033	2.2562	3.15543	3.17745	3.5273	5.28246	7.56048	8.95791	9.18936	8.65186	7.32494	4.69001	0.733994	-3.36483	-6.66006	-9.97803	-14.4749
1	-2.69481	-3.16003	-3.77523	-4.42953	-5.01207	-5.413	-5.6169	-5.77731	-6.01431	-6.26705	-6.44694	-6.55651	-6.63866	-6.72663	-6.84485	-6.98759	-7.10104	-7.11185	-6.89855	-6.36774	-5.67016	-5.04011	-4.49969	-3.9093	-3.21549	-2.49525	-1.80793	-1.13499	-0.48662	-0.116234	-0.304345	-0.566264	0.0876278	1.68028	2.96697	3.32451	3.89437	5.72511	8.01269	9.45879	9.80165	9.41042	8.21172	5.60586	1.53589	-2.77728	-6.32252	-9.8149	-14.3067
2	-2.78313	-3.28838	-3.9142	-4.56715	-5.15382	-5.58161	-5.83424	-6.03198	-6.26918	-6.49801	-6.65171	-6.7568	-6.8794	-7.0469	-7.25315	-7.47311	-7.65309	-7.72491	-7.58286	-7.15067	-6.59204	-6.14919	-5.80243	-5.33339	-4.67498	-3.98585	-3.37588	-2.7688	-2.12737	-1.82503	-2.30179	-2.97259	-2.57152	-0.9546	0.548023	1.19419	1.95711	3.75404	5.87654	7.18966	7.54944	7.40986	6.64267	4.43073	0.565776	-3.71428	-7.33555	-10.8464	-15.1288
3	-2.75263	-3.25345	-3.86647	-4.50731	-5.09158	-5.53565	-5.82463	-6.06665	-6.34304	-6.59474	-6.74897	-6.86146	-7.04076	-7.31074	-7.62266	-7.92527	-8.16711	-8.29164	-8.22655	-7.92759	-7.55338	-7.32548	-7.19173	-6.89319	-6.36672	-5.83968	-5.45871	-5.08081	-4.61296	-4.53931	-5.4521	-6.68893	-6.75063	-5.37896	-3.94852	-3.2831	-2.55738	-0.97862	0.791193	1.72836	1.91666	2.09935	2.0972	0.64366	-2.76103	-6.76768	-10.1471	-13.3396	-17.1435
4	-2.67857	-3.15061	-3.74544	-4.38024	-4.97218	-5.43916	-5.7645	-6.0486	-6.36496	-6.64845	-6.82351	-6.96474	-7.2073	-7.56868	-7.96573	-8.33145	-8.63002	-8.82478	-8.86767	-8.73503	-8.577	-8.59484	-8.71461	-8.65493	-8.35565	-8.08379	-8.00624	-7.93785	-7.74977	-7.98905	-9.33587	-11.0856	-11.608	-10.5727	-9.36108	-8.83647	-8.28229	-6.99838	-5.60333	-5.02514	-4.98379	-4.48649	-3.75203	-4.42504	-7.25216	-10.7954	-13.7054	-16.3661	-19.5411
5	-2.63827	-3.08091	-3.66962	-4.31814	-4.9402	-5.4502	-5.82252	-6.13882	-6.46242	-6.75202	-6.95925	-7.15512	-7.45765	-7.87133	-8.30396	-8.69678	-9.04991	-9.35433	-9.55561	-9.61897	-9.69576	-9.99227	-10.4222	-10.6789	-10.6877	-10.7179	-10.9409	-11.1784	-11.3067	-11.8626	-13.512	-15.5486	-16.3486	-15.5746	-14.5821	-14.2342	-13.8797	-12.8673	-11.7286	-11.2685	-11.1646	-10.4326	-9.31373	-9.49103	-11.7516	-14.7007	-17.0202	-19.0679	-21.5727
6	-2.60821	-3.0212	-3.60878	-4.27793	-4.93562	-5.48944	-5.90299	-6.24013	-6.55702	-6.84569	-7.09313	-7.35437	-7.70992	-8.15212	-8.59856	-9.01081	-9.42494	-9.85662	-10.2359	-10.5076	-10.823	-11.3953	-12.1335	-12.7169	-13.0557	-13.4019	-13.92	-14.455	-14.9008	-15.7543	-17.626	-19.8255	-20.7934	-20.2237	-19.4597	-19.3579	-19.2829	-18.5821	-17.6838	-17.2712	-17.0564	-16.1826	-14.9017	-14.7691	-16.5051	-18.8019	-20.4301	-21.751	-23.4816
7	-2.54224	-2.91943	-3.49763	-4.17527	-4.85077	-5.42322	-5.85107	-6.19905	-6.52706	-6.83878	-7.13154	-7.44829	-7.8485	-8.32257	-8.80251	-9.26351	-9.75308	-10.297	-10.8315	-11.304	-11.8473	-12.6496	-13.6206	-14.4592	-15.0825	-15.7299	-16.5539	-17.3926	-18.1334	-19.2603	-21.37	-23.7783	-24.9462	-24.5992	-24.1268	-24.409	-24.775	-24.5233	-24.0066	-23.8306	-23.693	-22.7619	-21.295	-20.8307	-22.0774	-23.7287	-24.564	-24.9787	-25.7358
8	-2.47193	-2.80863	-3.36806	-4.04094	-4.71801	-5.29075	-5.71773	-6.07763	-6.43935	-6.79285	-7.11945	-7.46612	-7.90482	-8.42986	-8.96975	-9.49748	-10.0609	-10.6925	-11.3543	-12.0146	-12.7715	-13.7599	-14.8915	-15.9104	-16.7586	-17.67	-18.7838	-19.9098	-20.9107	-22.283	-24.6484	-27.3336	-28.8008	-28.7867	-28.7049	-29.4477	-30.3257	-30.6075	-30.5852	-30.7943	-30.8681	-29.915	-28.1912	-27.3003	-27.9942	-28.9529	-28.9422	-28.379	-28.0646
9	-2.47244	-2.76962	-3.30692	-3.97126	-4.64958	-5.22956	-5.67037	-6.05905	-6.46581	-6.85398	-7.17946	-7.51837	-7.99331	-8.59624	-9.20834	-9.78171	-10.3881	-11.0866	-11.8633	-12.7014	-13.6599	-14.8169	-16.0847	-17.2512	-18.2817	-19.4018	-20.7398	-22.093	-23.3136	-24.9011	-27.4878	-30.4529	-32.3384	-32.8624	-33.2924	-34.4389	-35.7123	-36.4729	-36.9214	-37.452	-37.6517	-36.6412	-34.6587	-33.2539	-33.1867	-33.2884	-32.4545	-31.0463	-29.7756
10	-2.55733	-2.81616	-3.33525	-3.99681	-4.68306	-5.27704	-5.73746	-6.15837	-6.60898	-7.02033	-7.31882	-7.62245	-8.12325	-8.80485	-9.47419	-10.0546	-10.6653	-11.4099	-12.2857	-13.2756	-14.4049	-15.7075	-17.0965	-18.3951	-19.5822	-20.8656	-22.3618	-23.8824	-25.2919	-27.0674	-29.8155	-33.0066	-35.3498	-36.5322	-37.5301	-38.9879	-40.5051	-41.6268	-42.4401	-43.1478	-43.33	-42.2107	-39.9975	-38.0519	-37.0889	-36.2352	-34.647	-32.5812	-30.5665
11	-2.67113	-2.88707	-3.40033	-4.07423	-4.77205	-5.35813	-5.79187	-6.20275	-6.68235	-7.12516	-7.41602	-7.6914	-8.18625	-8.88387	-9.55416	-10.1097	-10.7034	-11.4676	-12.4012	-13.481	-14.7092	-16.0921	-17.5538	-18.9571	-20.2918	-21.7332	-23.3768	-25.0541	-26.6469	-28.5923	-31.4469	-34.7623	-37.4147	-39.0918	-40.5524	-42.304	-44.0479	-45.4347	-46.4859	-47.2947	-47.439	-46.2047	-43.7738	-41.3784	-39.7006	-38.0627	-35.8016	-33.1531	-30.5738
12	-2.76461	-2.94063	-3.46398	-4.16433	-4.87134	-5.41612	-5.76132	-6.10503	-6.58997	-7.07588	-7.39754	-7.66928	-8.11775	-8.74122	-9.34427	-9.85845	-10.4295	-11.1822	-12.1152	-13.2045	-14.4409	-15.8184	-17.2837	-18.7496	-20.2155	-21.8075	-23.5873	-25.407	-27.1655	-29.2384	-32.1036	-35.369	-38.0588	-39.9197	-41.6512	-43.6971	-45.702	-47.2708	-48.4317	-49.2985	-49.4485	-48.1536	-45.5783	-42.9336	-40.8892	-38.7733	-35.9494	-32.7609	-29.7781
13	-2.80921	-2.98446	-3.52673	-4.24483	-4.94759	-5.44553	-5.70646	-5.97958	-6.44773	-6.95459	-7.3054	-7.57703	-7.95848	-8.47023	-8.98948	-9.47596	-10.0294	-10.7381	-11.614	-12.6527	-13.8394	-15.1545	-16.5662	-18.0336	-19.5573	-21.198	-22.979	-24.8063	-26.6211	-28.6839	-31.3206	-34.2357	-36.7175	-38.6135	-40.5073	-42.7349	-44.8902	-46.5425	-47.7175	-48.542	-48.6613	-47.4456	-45.0241	-42.4168	-40.18	-37.7221	-34.5108	-30.9817	-27.7829
14	-2.78678	-3.02022	-3.58033	-4.28852	-4.96616	-5.43627	-5.6726	-5.9185	-6.35406	-6.83547	-7.17875	-7.43399	-7.74999	-8.16716	-8.63332	-9.1248	-9.66855	-10.3005	-11.0703	-12.0205	-13.1296	-14.352	-15.6623	-17.0513	-18.5078	-20.0176	-21.5725	-23.1817	-24.8678	-26.7105	-28.7945	-31.0042	-33.0907	-35.0182	-37.0318	-39.2306	-41.3032	-42.9282	-44.055	-44.7012	-44.6901	-43.7355	-41.8967	-39.6384	-37.2257	-34.4253	-31.0618	-27.5239	-24.3167
15	-2.71234	-2.9977	-3.5584	-4.23814	-4.88065	-5.3311	-5.56839	-5.81068	-6.21918	-6.66487	-6.98221	-7.21139	-7.48041	-7.84094	-8.2789	-8.77131	-9.28425	-9.81305	-10.4482	-11.2801	-12.2773	-13.3632	-14.5089	-15.7229	-16.9847	-18.2308	-19.4376	-20.7011	-22.1095	-23.5855	-25.0068	-26.4337	-28.0491	-29.9099	-31.9059	-33.903	-35.7359	-37.2395	-38.2716	-38.7092	-38.5551	-37.888	-36.7003	-34.8824	-32.4053	-29.4329	-26.169	-22.881	-19.8417
16	-2.60913	-2.86536	-3.39528	-4.04367	-4.65532	-5.0765	-5.28907	-5.51749	-5.92523	-6.37002	-6.67236	-6.87881	-7.13194	-7.48129	-7.89637	-8.34031	-8.77014	-9.17883	-9.67431	-10.3638	-11.2026	-12.0896	-12.9911	-13.9246	-14.8802	-15.8064	-16.6866	-17.611	-18.6562	-19.7121	-20.6238	-21.5156	-22.6993	-24.2602	-25.9846	-27.6754	-29.2273	-30.5364	-31.4364	-31.7608	-31.5627	-31.0249	-30.1212	-28.5791	-26.2885	-23.5322	-20.6173	-17.7201	-14.9856
17	-2.49555	-2.68344	-3.17122	-3.79186	-4.37833	-4.76524	-4.9356	-5.13802	-5.55165	-6.01142	-6.31127	-6.50614	-6.76077	-7.11344	-7.49419	-7.85154	-8.16934	-8.46243	-8.83328	-9.37755	-10.0348	-10.6875	-11.301	-11.9043	-12.5106	-13.1087	-13.6958	-14.2983	-14.9357	-15.5573	-16.1002	-16.6669	-17.4707	-18.5754	-19.8476	-21.1508	-22.3742	-23.4072	-24.1233	-24.4009	-24.2355	-23.693	-22.7633	-21.3462	-19.4244	-17.1756	-14.7903	-12.3968	-10.1141
18	-2.38613	-2.5664	-3.03718	-3.63505	-4.19658	-4.55995	-4.70895	-4.88793	-5.27463	-5.7144	-6.01143	-6.21041	-6.45703	-6.77805	-7.09856	-7.37131	-7.59876	-7.80741	-8.08548	-8.50975	-9.00363	-9.43617	-9.78095	-10.0916	-10.398	-10.6924	-10.9653	-11.2112	-11.4261	-11.6102	-11.772	-11.9999	-12.4347	-13.1099	-13.9182	-14.7531	-15.5349	-16.1888	-16.6447	-16.8341	-16.6879	-16.1387	-15.1834	-13.8939	-12.3509	-10.6451	-8.86782	-7.10657	-5.45437
19	-2.26648	-2.51608	-2.99651	-3.57046	-4.10062	-4.45101	-4.60711	-4.77169	-5.09683	-5.47461	-5.76105	-5.97186	-6.19065	-6.43711	-6.67611	-6.88322	-7.05394	-7.20451	-7.4107	-7.73685	-8.09659	-8.35138	-8.48496	-8.57441	-8.65181	-8.6808	-8.63205	-8.51095	-8.32861	-8.09452	-7.82484	-7.62896	-7.67685	-7.98548	-8.37155	-8.6947	-8.95545	-9.16861	-9.31179	-9.34594	-9.17822	-8.68577	-7.85132	-6.78174	-5.58708	-4.36883	-3.21567	-2.16363	-1.24016
20	-2.09356	-2.42166	-2.90487	-3.44024	-3.92485	-4.25675	-4.42519	-4.58251	-4.84729	-5.15808	-5.42425	-5.63431	-5.81193	-5.97466	-6.13451	-6.28838	-6.40916	-6.49194	-6.60859	-6.82397	-7.05924	-7.18513	-7.17852	-7.09743	-6.96774	-6.76578	-6.46935	-6.07102	-5.56793	-4.96876	-4.29456	-3.67287	-3.3003	-3.19431	-3.13796	-2.98008	-2.77307	-2.58867	-2.43797	-2.30674	-2.11374	-1.73888	-1.14967	-0.416856	0.367805	1.0788	1.61433	2.00023	2.28802
21	-1.8595	-2.22914	-2.68725	-3.1634	-3.58719	-3.8889	-4.063	-4.21878	-4.44321	-4.70175	-4.93742	-5.12646	-5.26143	-5.3599	-5.46022	-5.56633	-5.6257	-5.61331	-5.60675	-5.68373	-5.79132	-5.82774	-5.74162	-5.52111	-5.18324	-4.78517	-4.35215	-3.81102	-3.08785	-2.20253	-1.21337	-0.241813	0.550406	1.13382	1.65174	2.2022	2.74123	3.20927	3.57856	3.83694	4.03379	4.25517	4.53782	4.86	5.16893	5.34993	5.31958	5.17309	5.0365
22	-1.62523	-2.00119	-2.41186	-2.81696	-3.17624	-3.44985	-3.63497	-3.79511	-3.9828	-4.18725	-4.38376	-4.54861	-4.66029	-4.72943	-4.79353	-4.85158	-4.83934	-4.72394	-4.58941	-4.52495	-4.50379	-4.45253	-4.2945	-3.9524	-3.43739	-2.88838	-2.3774	-1.76113	-0.891449	0.191717	1.38138	2.57044	3.65367	4.59864	5.46739	6.29823	7.05439	7.69085	8.17943	8.50132	8.68258	8.77661	8.81852	8.82139	8.76163	8.53665	8.08375	7.5685	7.18964
23	-1.44327	-1.79668	-2.14718	-2.48076	-2.78341	-3.04121	-3.24869	-3.41555	-3.55564	-3.69194	-3.84453	-3.99653	-4.11588	-4.19389	-4.24156	-4.24681	-4.15939	-3.95799	-3.72345	-3.5413	-3.39708	-3.2348	-2.97522	-2.52346	-1.89083	-1.24249	-0.662844	0.02373	0.995984	2.19063	3.46169	4.70968	5.8688	6.92628	7.93734	8.92289	9.80674	10.5098	11.0139	11.3229	11.47	11.5059	11.465	11.3621	11.1703	10.7723	10.1033	9.39008	8.90015
24	-1.30569	-1.61133	-1.90286	-2.1792	-2.43926	-2.68186	-2.89612	-3.05378	-3.14302	-3.21662	-3.33219	-3.47717	-3.6083	-3.69592	-3.7221	-3.66972	-3.52238	-3.28128	-3.00299	-2.74517	-2.50171	-2.23877	-1.88833	-1.35826	-0.659157	0.0491557	0.688422	1.44164	2.49049	3.74784	5.03708	6.26386	7.392	8.43216	9.45409	10.4797	11.4015	12.1091	12.5805	12.8257	12.905	12.9081	12.8755	12.7897	12.5955	12.1618	11.4195	10.626	10.0852
25	-1.19179	-1.43314	-1.68072	-1.9257	-2.15928	-2.37257	-2.55033	-2.66588	-2.71115	-2.74828	-2.84342	-2.97705	-3.09227	-3.14963	-3.12497	-3.01354	-2.84091	-2.62956	-2.38354	-2.10475	-1.8044	-1.49291	-1.11254	-0.555314	0.176971	0.922169	1.60143	2.40446	3.51642	4.82784	6.13356	7.34909	8.47393	9.52321	10.5301	11.5006	12.3695	13.0627	13.5161	13.6811	13.648	13.5893	13.5628	13.4901	13.278	12.8173	12.0599	11.2431	10.646
26	-1.09222	-1.30633	-1.53015	-1.75016	-1.95283	-2.12462	-2.25026	-2.31139	-2.30818	-2.30762	-2.37792	-2.48673	-2.55874	-2.5556	-2.47111	-2.32189	-2.15961	-2.01418	-1.83689	-1.57611	-1.26201	-0.950048	-0.584709	-0.0276619	0.728824	1.50087	2.19601	3.01993	4.17268	5.52373	6.8373	8.03968	9.16872	10.234	11.2053	12.065	12.8333	13.5113	13.974	14.0793	13.9377	13.8112	13.7779	13.6985	13.4483	12.964	12.2338	11.4404	10.7955
27	-1.0039	-1.29672	-1.51735	-1.68644	-1.82461	-1.95218	-2.06098	-2.09184	-2.01568	-1.92898	-1.93651	-1.99881	-2.0156	-1.9543	-1.84043	-1.70402	-1.57926	-1.47806	-1.34084	-1.10843	-0.815489	-0.52567	-0.174644	0.397361	1.19481	1.99444	2.67999	3.48506	4.63804	5.98771	7.26304	8.39348	9.44603	10.4369	11.313	12.0543	12.7354	13.4033	13.8908	13.9917	13.8184	13.675	13.6506	13.5797	13.3301	12.8755	12.2291	11.5171	10.8819
28	-0.939653	-1.37319	-1.59759	-1.69429	-1.74471	-1.82943	-1.95127	-1.97395	-1.81081	-1.60255	-1.5133	-1.50782	-1.46682	-1.364	-1.25254	-1.16175	-1.07851	-0.982264	-0.841142	-0.628999	-0.371432	-0.106845	0.244683	0.850588	1.70063	2.52484	3.17912	3.92906	5.03695	6.33647	7.52622	8.53289	9.43993	10.2815	11.0236	11.6627	12.2821	12.9334	13.4394	13.5789	13.451	13.3476	13.355	13.3164	13.1107	12.7281	12.1892	11.5846	11.0149
29	-0.926276	-1.41798	-1.62715	-1.66744	-1.65252	-1.69492	-1.80391	-1.804	-1.57739	-1.27911	-1.09664	-1.01044	-0.913086	-0.783249	-0.673049	-0.600895	-0.527218	-0.415608	-0.256098	-0.0470812	0.192446	0.442679	0.795083	1.42285	2.3043	3.13341	3.74313	4.41801	5.44295	6.653	7.74112	8.63642	9.43023	10.1635	10.8075	11.3627	11.9139	12.5157	13.0037	13.1699	13.0992	13.0524	13.1035	13.1047	12.9428	12.6092	12.1253	11.5843	11.0881
30	-0.962925	-1.37267	-1.54018	-1.55897	-1.52256	-1.52353	-1.56956	-1.51642	-1.26638	-0.94265	-0.697229	-0.532938	-0.388192	-0.24449	-0.120183	-0.0184574	0.0837817	0.210073	0.377873	0.598214	0.848068	1.09885	1.44278	2.06102	2.93165	3.73638	4.29723	4.89435	5.81279	6.9076	7.89773	8.72398	9.47919	10.1919	10.8031	11.2942	11.7613	12.277	12.7021	12.854	12.8114	12.8098	12.9054	12.9426	12.8014	12.468	11.9664	11.4246	10.9826
31	-1.00103	-1.28468	-1.40887	-1.42657	-1.39075	-1.35384	-1.31922	-1.20251	-0.948227	-0.635834	-0.363939	-0.151602	0.0177823	0.161141	0.295397	0.428137	0.551958	0.669934	0.822423	1.04654	1.31062	1.56435	1.89049	2.47028	3.2885	4.04269	4.56013	5.09469	5.90818	6.88163	7.77531	8.54312	9.27121	9.97358	10.5672	11.0155	11.4145	11.8433	12.1903	12.3044	12.2656	12.2921	12.424	12.4909	12.3628	12.0257	11.5091	10.9679	10.57
32	-0.996407	-1.19601	-1.29574	-1.31759	-1.28354	-1.21535	-1.11419	-0.944345	-0.686738	-0.394918	-0.132624	0.0800576	0.243468	0.373244	0.497701	0.624692	0.728538	0.802727	0.910686	1.11416	1.37446	1.62176	1.9216	2.44027	3.17119	3.85444	4.33933	4.83679	5.56552	6.4274	7.22375	7.91608	8.57531	9.21317	9.76159	10.1875	10.5582	10.9282	11.2078	11.2799	11.2308	11.2676	11.4198	11.5076	11.3978	11.0885	10.6185	10.1305	9.77641
33	-0.935072	-1.09616	-1.18624	-1.21092	-1.17584	-1.08658	-0.944341	-0.74247	-0.484862	-0.215704	0.0168151	0.200931	0.341711	0.453173	0.556616	0.653504	0.713051	0.728806	0.780184	0.945091	1.18178	1.40918	1.67457	2.12119	2.74986	3.3522	3.80601	4.27637	4.9341	5.69579	6.39732	7.00314	7.5658	8.1035	8.58744	9.00135	9.36808	9.69997	9.92554	9.9623	9.90148	9.93683	10.0909	10.1841	10.0894	9.82237	9.4311	9.02413	8.712
34	-0.809318	-0.963692	-1.04972	-1.07117	-1.0318	-0.935379	-0.784622	-0.580403	-0.332843	-0.0855499	0.116156	0.269198	0.389197	0.487697	0.572481	0.637887	0.656855	0.627306	0.631975	0.751783	0.947369	1.13894	1.362	1.7385	2.27268	2.79554	3.20726	3.63967	4.2285	4.89999	5.51386	6.03515	6.50155	6.9394	7.35837	7.75913	8.12268	8.42195	8.6043	8.62129	8.56086	8.59094	8.72651	8.8025	8.70679	8.4682	8.14014	7.80095	7.5254
35	-0.611446	-0.777151	-0.855558	-0.86294	-0.815571	-0.729603	-0.609991	-0.441663	-0.220921	0.00818636	0.197176	0.343037	0.462612	0.563586	0.645631	0.701154	0.711311	0.677364	0.667115	0.746677	0.886035	1.02336	1.19647	1.51768	1.98783	2.44405	2.79019	3.15298	3.66332	4.25319	4.79117	5.24296	5.64144	6.01568	6.38801	6.76275	7.10033	7.35732	7.50491	7.5267	7.49226	7.52094	7.61615	7.64496	7.51904	7.26683	6.93877	6.61325	6.36523
36	-0.333755	-0.515094	-0.573117	-0.550844	-0.491298	-0.43711	-0.395404	-0.309767	-0.139339	0.0781469	0.291654	0.480628	0.638643	0.767611	0.876405	0.966615	1.02778	1.05811	1.08666	1.14222	1.21257	1.27478	1.39057	1.68418	2.1435	2.55729	2.80189	3.04254	3.45314	3.96858	4.44708	4.85742	5.24435	5.62716	5.99003	6.31419	6.57943	6.76933	6.88818	6.94832	6.97892	7.01788	7.04915	6.99352	6.79529	6.45916	6.02016	5.6133	5.38013
Y-component of velocity field (v_y) for H10
Y↓ & X→	-33	-32	-31	-30	-29	-28	-27	-26	-25	-24	-23	-22	-21	-20	-19	-18	-17	-16	-15	-14	-13	-12	-11	-10	-9	-8	-7	-6	-5	-4	-3	-2	-1	0	1	2	3	4	5	6	7	8	9	10	11	12	13	14	15
-37	-1.31604	-1.47363	-1.65483	-1.88381	-2.18471	-2.58081	-3.0137	-3.27882	-3.2485	-3.12163	-3.1361	-3.28295	-3.4468	-3.58544	-3.71907	-3.82729	-3.82121	-3.67453	-3.57763	-3.71717	-3.97846	-4.13989	-4.18387	-4.24765	-4.34907	-4.32782	-4.1056	-3.87309	-3.81694	-3.83167	-3.72099	-3.45971	-3.13966	-2.79178	-2.365	-1.85837	-1.40981	-1.13128	-0.894069	-0.511226	0.00330616	0.512526	0.94067	1.28589	1.56717	1.84063	2.15076	2.46692	2.74381
-36	-1.38455	-1.70919	-1.94727	-2.14916	-2.36522	-2.64504	-2.96598	-3.17623	-3.18241	-3.14607	-3.2529	-3.44916	-3.58213	-3.64557	-3.75731	-3.93437	-4.02536	-3.94523	-3.86576	-3.96622	-4.14614	-4.207	-4.15912	-4.17112	-4.28105	-4.33255	-4.23224	-4.10563	-4.08246	-4.09779	-4.02564	-3.84748	-3.61795	-3.34149	-2.95553	-2.45292	-1.97624	-1.64498	-1.34403	-0.901967	-0.347633	0.168429	0.587145	0.958575	1.32563	1.70142	2.08878	2.46233	2.79158
-35	-1.55227	-1.95183	-2.22886	-2.44207	-2.65018	-2.91115	-3.21294	-3.41824	-3.44397	-3.44548	-3.59833	-3.83643	-3.99467	-4.07075	-4.20028	-4.40849	-4.53615	-4.49126	-4.44618	-4.58046	-4.78253	-4.83972	-4.76974	-4.76514	-4.88235	-4.97482	-4.9466	-4.88793	-4.8939	-4.90118	-4.79849	-4.58471	-4.33315	-4.04656	-3.63419	-3.07089	-2.51107	-2.08858	-1.69242	-1.15262	-0.507507	0.0785637	0.551164	0.986631	1.44253	1.91796	2.39909	2.84938	3.23004
-34	-1.75392	-2.17227	-2.47773	-2.7264	-2.97435	-3.27688	-3.61746	-3.85106	-3.89059	-3.9019	-4.07347	-4.3466	-4.56005	-4.69771	-4.8666	-5.08332	-5.21287	-5.18632	-5.18601	-5.39491	-5.67849	-5.79236	-5.74916	-5.75682	-5.88603	-6.00202	-6.01364	-5.99695	-6.02896	-6.02484	-5.85383	-5.53637	-5.1949	-4.84523	-4.36222	-3.69836	-3.02373	-2.48964	-1.98181	-1.32178	-0.553651	0.143868	0.71266	1.23798	1.78488	2.35516	2.93376	3.46821	3.90304
-33	-1.92422	-2.34121	-2.67205	-2.96605	-3.27251	-3.63995	-4.04244	-4.3209	-4.37971	-4.39739	-4.57945	-4.88154	-5.15393	-5.36322	-5.57491	-5.79253	-5.91483	-5.90408	-5.95238	-6.24463	-6.62487	-6.81923	-6.83079	-6.87329	-7.02515	-7.16155	-7.19832	-7.20964	-7.26531	-7.2518	-7.00594	-6.56745	-6.11282	-5.67571	-5.10081	-4.3214	-3.52369	-2.87566	-2.25478	-1.46803	-0.5634	0.26528	0.951565	1.58055	2.21971	2.87793	3.54486	4.15896	4.65445
-32	-1.99789	-2.42937	-2.78994	-3.12487	-3.47943	-3.89809	-4.35076	-4.67397	-4.76874	-4.81399	-5.01736	-5.34308	-5.65194	-5.904	-6.14386	-6.36979	-6.50133	-6.51823	-6.61238	-6.96466	-7.41252	-7.67464	-7.74806	-7.84166	-8.03276	-8.20084	-8.26563	-8.30293	-8.38063	-8.36506	-8.06912	-7.5429	-6.99655	-6.47624	-5.81119	-4.92608	-4.02039	-3.27421	-2.55392	-1.64997	-0.614088	0.343735	1.14781	1.88228	2.61403	3.35119	4.08446	4.76179	5.3281
-31	-1.92786	-2.41569	-2.81586	-3.17649	-3.54572	-3.97093	-4.43108	-4.78264	-4.9378	-5.05141	-5.30211	-5.64678	-5.94923	-6.18468	-6.42311	-6.67537	-6.8525	-6.92166	-7.05521	-7.41847	-7.86826	-8.15475	-8.27929	-8.43429	-8.68542	-8.9083	-9.01946	-9.0916	-9.19033	-9.18419	-8.88935	-8.35202	-7.77366	-7.19898	-6.46522	-5.50529	-4.52575	-3.71064	-2.91524	-1.91583	-0.769118	0.298316	1.20387	2.03627	2.86044	3.66644	4.43498	5.15028	5.79951
-30	-1.81074	-2.344	-2.78395	-3.17133	-3.54686	-3.95078	-4.37507	-4.72545	-4.94596	-5.14842	-5.45737	-5.8162	-6.09443	-6.28946	-6.50718	-6.77929	-7.01274	-7.15879	-7.34398	-7.69377	-8.10259	-8.3857	-8.55682	-8.78023	-9.10274	-9.39585	-9.57082	-9.68864	-9.8072	-9.81684	-9.56264	-9.07578	-8.51314	-7.90585	-7.11865	-6.10547	-5.07087	-4.19339	-3.32319	-2.23231	-0.982036	0.191164	1.19992	2.13425	3.05333	3.92501	4.71813	5.46155	6.19381
-29	-1.80323	-2.28647	-2.75019	-3.19229	-3.61071	-4.00329	-4.36266	-4.67207	-4.93173	-5.20553	-5.55533	-5.92338	-6.20442	-6.39925	-6.59883	-6.84603	-7.10178	-7.34283	-7.61918	-7.97785	-8.35278	-8.64138	-8.87113	-9.16769	-9.55747	-9.91981	-10.1676	-10.3398	-10.4767	-10.4991	-10.2952	-9.87778	-9.3433	-8.70416	-7.86124	-6.79315	-5.69143	-4.72014	-3.73729	-2.52871	-1.157	0.147498	1.29317	2.35351	3.37445	4.31948	5.15915	5.94602	6.74358
-28	-1.90931	-2.26919	-2.73742	-3.24791	-3.73454	-4.1317	-4.42058	-4.66606	-4.93133	-5.24268	-5.61054	-5.98869	-6.30848	-6.55349	-6.75218	-6.9455	-7.19204	-7.52946	-7.92445	-8.33085	-8.70991	-9.03038	-9.32957	-9.69599	-10.1417	-10.5667	-10.8927	-11.1281	-11.2851	-11.3111	-11.1363	-10.7634	-10.2442	-9.57368	-8.67254	-7.53254	-6.33538	-5.23646	-4.10878	-2.75888	-1.24926	0.202264	1.50262	2.70733	3.84844	4.88682	5.79383	6.63173	7.47424
-27	-1.9958	-2.27638	-2.73836	-3.27975	-3.79856	-4.19359	-4.43792	-4.63747	-4.88896	-5.20749	-5.58585	-5.98603	-6.35712	-6.66426	-6.88729	-7.06185	-7.31253	-7.72206	-8.2159	-8.69791	-9.13245	-9.5113	-9.87358	-10.2936	-10.7845	-11.2694	-11.6796	-11.989	-12.1747	-12.192	-11.9934	-11.5969	-11.0639	-10.3806	-9.43395	-8.19696	-6.87319	-5.64237	-4.38256	-2.89964	-1.26075	0.308832	1.72317	3.06192	4.35876	5.52387	6.48764	7.34695	8.22519
-26	-1.98407	-2.27703	-2.7286	-3.24779	-3.74364	-4.12588	-4.3687	-4.56154	-4.79124	-5.09272	-5.48172	-5.9173	-6.33433	-6.68937	-6.95846	-7.17517	-7.46454	-7.91345	-8.4626	-9.02869	-9.55913	-10.0182	-10.4381	-10.9024	-11.4366	-11.9815	-12.4739	-12.859	-13.0829	-13.0898	-12.8308	-12.3581	-11.7904	-11.1112	-10.1274	-8.76726	-7.29186	-5.94016	-4.57855	-2.98233	-1.22804	0.426328	1.90879	3.36772	4.85393	6.17273	7.16834	8.01062	8.92756
-25	-1.89642	-2.21686	-2.65657	-3.14726	-3.62064	-4.00889	-4.28535	-4.49707	-4.70233	-4.97208	-5.36554	-5.83461	-6.28576	-6.67183	-6.98615	-7.26382	-7.60487	-8.08168	-8.66086	-9.28761	-9.90325	-10.4526	-10.9573	-11.4967	-12.0962	-12.7009	-13.2503	-13.6856	-13.9478	-13.976	-13.7174	-13.2327	-12.6567	-11.9626	-10.9113	-9.41213	-7.78071	-6.30819	-4.8443	-3.12938	-1.24355	0.528587	2.12112	3.72692	5.40143	6.86065	7.87971	8.70757	9.67933
-24	-1.77592	-2.07853	-2.5077	-2.99983	-3.49135	-3.91893	-4.246	-4.48372	-4.66799	-4.9048	-5.2948	-5.78415	-6.25377	-6.65437	-6.99705	-7.32177	-7.71181	-8.22513	-8.82774	-9.47014	-10.1199	-10.7538	-11.3848	-12.053	-12.7544	-13.421	-13.9911	-14.4351	-14.7266	-14.8259	-14.6922	-14.3387	-13.8128	-13.0577	-11.8807	-10.2341	-8.45652	-6.85377	-5.26413	-3.40894	-1.35823	0.607553	2.41024	4.21149	6.03893	7.59078	8.63879	9.48756	10.5356
-23	-1.70236	-1.97587	-2.39986	-2.90409	-3.41832	-3.87258	-4.22264	-4.47027	-4.64735	-4.87556	-5.27228	-5.77591	-6.24994	-6.65125	-7.01707	-7.39581	-7.8497	-8.41482	-9.04097	-9.6709	-10.3121	-10.9967	-11.7399	-12.5427	-13.3647	-14.1068	-14.6942	-15.1332	-15.4417	-15.6206	-15.6613	-15.5034	-15.0504	-14.2037	-12.8623	-11.0539	-9.1279	-7.3895	-5.66944	-3.67845	-1.46636	0.710948	2.75279	4.74323	6.66605	8.25789	9.33571	10.2296	11.3543
-22	-1.74429	-2.02182	-2.44867	-2.94907	-3.44727	-3.86793	-4.1738	-4.39585	-4.58667	-4.85065	-5.28087	-5.80197	-6.27004	-6.66249	-7.06044	-7.52392	-8.07371	-8.70747	-9.36111	-9.97365	-10.583	-11.2639	-12.0496	-12.9401	-13.8763	-14.715	-15.351	-15.8035	-16.1149	-16.3356	-16.506	-16.505	-16.1016	-15.1542	-13.6397	-11.6539	-9.56917	-7.70315	-5.87827	-3.78969	-1.46371	0.870732	3.09104	5.20235	7.15126	8.73767	9.84088	10.7881	11.9728
-21	-1.83877	-2.1331	-2.56212	-3.04619	-3.50566	-3.86146	-4.08955	-4.26435	-4.46841	-4.77708	-5.24472	-5.78231	-6.24477	-6.63075	-7.0612	-7.60675	-8.25072	-8.95548	-9.64204	-10.2433	-10.8225	-11.4907	-12.2979	-13.2454	-14.2644	-15.1862	-15.8834	-16.3652	-16.6733	-16.8977	-17.1266	-17.2025	-16.8012	-15.7521	-14.0884	-11.9583	-9.76275	-7.83672	-5.98154	-3.86045	-1.48289	0.928856	3.23545	5.39817	7.34713	8.93014	10.072	11.0951	12.3722
-20	-1.87263	-2.15249	-2.5707	-3.04134	-3.47846	-3.79686	-3.97558	-4.10876	-4.29428	-4.60099	-5.07277	-5.61654	-6.08617	-6.48164	-6.9273	-7.49788	-8.18184	-8.939	-9.66337	-10.2648	-10.8409	-11.5559	-12.4496	-13.4655	-14.5129	-15.4557	-16.1881	-16.6987	-17.0069	-17.2154	-17.4344	-17.4938	-17.034	-15.885	-14.1286	-11.9539	-9.77623	-7.93145	-6.17373	-4.10908	-1.74695	0.65564	2.94989	5.11777	7.10254	8.74443	9.96459	11.1118	12.5862
-19	-1.82063	-2.07123	-2.47279	-2.93649	-3.37349	-3.69564	-3.87465	-3.98937	-4.12993	-4.38704	-4.82996	-5.36881	-5.85017	-6.25798	-6.69347	-7.23091	-7.89517	-8.66947	-9.41968	-10.0272	-10.6244	-11.43	-12.4524	-13.5386	-14.5704	-15.486	-16.2318	-16.7656	-17.0676	-17.2343	-17.3822	-17.3506	-16.7921	-15.5612	-13.7795	-11.6646	-9.6286	-7.9916	-6.453	-4.55748	-2.31824	-0.035052	2.14813	4.27433	6.31692	8.07003	9.41657	10.7491	12.5228
-18	-1.7289	-2.00006	-2.40171	-2.85898	-3.29695	-3.64119	-3.85799	-3.98657	-4.09059	-4.29357	-4.70508	-5.23384	-5.70677	-6.09545	-6.49524	-6.9832	-7.60062	-8.34394	-9.07841	-9.68363	-10.3003	-11.1572	-12.2401	-13.3484	-14.358	-15.2617	-16.037	-16.5928	-16.8565	-16.9302	-16.9567	-16.8037	-16.1531	-14.8844	-13.1383	-11.1424	-9.29786	-7.90982	-6.65861	-5.06829	-3.12814	-1.1118	0.866629	2.88426	4.93154	6.78125	8.296	9.8763	11.9877
-17	-1.63655	-1.98349	-2.40362	-2.85078	-3.27882	-3.64175	-3.90816	-4.07273	-4.16615	-4.33738	-4.72874	-5.23993	-5.67178	-5.99899	-6.34474	-6.7941	-7.3633	-8.0351	-8.70652	-9.28967	-9.90473	-10.7414	-11.7836	-12.8583	-13.8604	-14.7891	-15.6103	-16.1738	-16.354	-16.2817	-16.1557	-15.8749	-15.1354	-13.8364	-12.147	-10.3067	-8.68731	-7.5686	-6.66052	-5.52484	-4.08576	-2.49037	-0.802712	1.01396	2.93635	4.79439	6.49466	8.37897	10.8316
-16	-1.5688	-1.96004	-2.386	-2.81831	-3.22857	-3.58844	-3.87149	-4.05483	-4.15345	-4.31559	-4.6852	-5.15609	-5.52115	-5.7704	-6.06179	-6.48651	-7.01986	-7.61807	-8.2103	-8.74478	-9.32862	-10.1211	-11.1107	-12.1554	-13.1609	-14.1062	-14.9311	-15.449	-15.5067	-15.2701	-14.9916	-14.5693	-13.6631	-12.2093	-10.509	-8.87489	-7.58834	-6.83982	-6.38253	-5.84899	-5.07204	-4.01126	-2.68898	-1.19854	0.393683	2.09048	3.94191	6.16888	8.97765
-15	-1.53904	-1.88817	-2.28867	-2.70239	-3.09118	-3.41707	-3.65749	-3.81752	-3.92784	-4.09999	-4.43602	-4.83532	-5.1174	-5.29438	-5.54203	-5.95011	-6.46162	-7.00835	-7.52845	-7.98593	-8.50531	-9.26269	-10.2453	-11.2956	-12.3004	-13.2159	-13.9657	-14.3684	-14.2814	-13.8936	-13.4791	-12.8898	-11.6972	-9.90468	-8.08448	-6.70658	-5.89032	-5.65435	-5.77906	-5.97156	-5.96498	-5.51661	-4.63224	-3.60714	-2.56851	-1.23182	0.692475	3.26515	6.44434
-14	-1.52892	-1.81223	-2.18206	-2.57986	-2.94705	-3.22551	-3.39749	-3.51751	-3.64618	-3.83907	-4.13389	-4.44487	-4.6402	-4.75263	-4.95439	-5.32707	-5.79932	-6.29077	-6.73598	-7.10033	-7.53059	-8.23134	-9.18643	-10.2108	-11.1699	-12.0089	-12.6487	-12.9256	-12.7147	-12.1985	-11.6349	-10.8383	-9.33057	-7.19652	-5.25942	-4.13572	-3.80175	-4.12087	-4.88199	-5.8404	-6.64082	-6.87209	-6.52492	-6.05969	-5.64529	-4.74044	-2.83593	-0.00062219	3.51535
-13	-1.51416	-1.77934	-2.14161	-2.53172	-2.88044	-3.11918	-3.23797	-3.33181	-3.48383	-3.69653	-3.9484	-4.17263	-4.28917	-4.34202	-4.48011	-4.77294	-5.15696	-5.55882	-5.91206	-6.17955	-6.5062	-7.09515	-7.93046	-8.82864	-9.66126	-10.3857	-10.932	-11.135	-10.8602	-10.2452	-9.49602	-8.44949	-6.70144	-4.41411	-2.4915	-1.59442	-1.65225	-2.47641	-3.84993	-5.53127	-7.10686	-8.07084	-8.37531	-8.50816	-8.62619	-8.07927	-6.26646	-3.30106	0.489225
-12	-1.47015	-1.7566	-2.12542	-2.51058	-2.84606	-3.06649	-3.16747	-3.25372	-3.41083	-3.6164	-3.82319	-3.97735	-4.02738	-4.01625	-4.0667	-4.23941	-4.49123	-4.7675	-5.00693	-5.17182	-5.38692	-5.82913	-6.48368	-7.18936	-7.8439	-8.43557	-8.91222	-9.08872	-8.79974	-8.12701	-7.21982	-5.96388	-4.07598	-1.80267	-0.0826135	0.421004	-0.151114	-1.54171	-3.52877	-5.88324	-8.17401	-9.85867	-10.8412	-11.5482	-12.0787	-11.7339	-9.883	-6.68794	-2.5446
-11	-1.37548	-1.68541	-2.05284	-2.42647	-2.75501	-2.98764	-3.1161	-3.20835	-3.32441	-3.46826	-3.62554	-3.73845	-3.73544	-3.64574	-3.58395	-3.61301	-3.7084	-3.8333	-3.93707	-3.98728	-4.08794	-4.38659	-4.86564	-5.3817	-5.85882	-6.32307	-6.74432	-6.91269	-6.63075	-5.95266	-5.00466	-3.68684	-1.75797	0.426637	1.7339	1.43369	-0.0673818	-2.24941	-4.90459	-7.89979	-10.8321	-13.1444	-14.7094	-15.9031	-16.7453	-16.3966	-14.1376	-10.3131	-5.56018
-10	-1.25501	-1.57088	-1.92035	-2.27164	-2.59293	-2.85256	-3.03221	-3.13748	-3.18745	-3.24035	-3.3467	-3.4358	-3.39	-3.22058	-3.04854	-2.94438	-2.89182	-2.86417	-2.8265	-2.75855	-2.746	-2.90775	-3.22598	-3.57888	-3.91205	-4.2722	-4.64088	-4.79491	-4.52188	-3.8761	-2.98831	-1.74956	0.0967803	2.09451	2.85879	1.5721	-1.01053	-4.02802	-7.30911	-10.8676	-14.3432	-17.1563	-19.156	-20.6948	-21.7209	-21.2174	-18.3539	-13.7314	-8.31676
-9	-1.16653	-1.46398	-1.78025	-2.0979	-2.39949	-2.66751	-2.87804	-2.99571	-3.01046	-3.00632	-3.06717	-3.12174	-3.03701	-2.81706	-2.58255	-2.40146	-2.251	-2.10415	-1.94654	-1.77609	-1.65491	-1.66521	-1.80594	-2.01253	-2.25321	-2.54584	-2.852	-2.96466	-2.69031	-2.08159	-1.26308	-0.155713	1.44303	3.0511	3.29524	1.40094	-1.7614	-5.2334	-8.89485	-12.8497	-16.7379	-19.925	-22.2111	-23.908	-24.9324	-24.2538	-21.0572	-16.0756	-10.4225
-8	-1.13269	-1.38953	-1.66	-1.93263	-2.19594	-2.43834	-2.63915	-2.76139	-2.78842	-2.7818	-2.80473	-2.80471	-2.68369	-2.45423	-2.22276	-2.03881	-1.85557	-1.63345	-1.38307	-1.12708	-0.902421	-0.750977	-0.702889	-0.778639	-0.967804	-1.21564	-1.43831	-1.48003	-1.20231	-0.637915	0.126685	1.09994	2.34328	3.42103	3.25154	1.23956	-1.88672	-5.34048	-9.07077	-13.2116	-17.3594	-20.7899	-23.2286	-24.9304	-25.8224	-25.0329	-21.8898	-17.1098	-11.7395
-7	-1.127	-1.33498	-1.55133	-1.76792	-1.97661	-2.16921	-2.33265	-2.44506	-2.49355	-2.50031	-2.48849	-2.4309	-2.28203	-2.07018	-1.88585	-1.75199	-1.57975	-1.30362	-0.963399	-0.615438	-0.289284	-0.00567974	0.185708	0.21444	0.0847969	-0.090241	-0.199916	-0.163452	0.0839451	0.54517	1.20095	2.03088	3.00392	3.70343	3.21316	1.0574	-2.05538	-5.39023	-9.00333	-13.1418	-17.3865	-20.9198	-23.4111	-25.1057	-25.9464	-25.1283	-22.0488	-17.4752	-12.4823
-6	-1.12496	-1.28776	-1.44717	-1.60071	-1.74592	-1.88028	-1.99788	-2.08673	-2.13592	-2.14052	-2.09657	-1.99725	-1.83709	-1.65716	-1.53704	-1.47359	-1.32872	-1.00467	-0.569027	-0.114978	0.309196	0.672374	0.931331	1.03487	1.00083	0.946978	0.966286	1.06028	1.22348	1.50141	1.95575	2.62158	3.50318	4.12289	3.3791	0.744385	-2.76968	-6.15039	-9.58231	-13.5538	-17.7091	-21.1845	-23.6469	-25.3913	-26.349	-25.5588	-22.3145	-17.6038	-12.7766
-5	-1.11687	-1.24224	-1.35037	-1.44756	-1.54013	-1.63428	-1.7269	-1.79821	-1.83004	-1.81608	-1.75361	-1.64688	-1.50493	-1.36618	-1.29283	-1.26455	-1.12708	-0.772121	-0.27426	0.261439	0.76552	1.1842	1.48503	1.65281	1.71585	1.76453	1.85747	1.95059	2.00193	2.08464	2.31158	2.7782	3.55254	4.106	3.13724	0.0469936	-3.88053	-7.36622	-10.6293	-14.287	-18.1006	-21.3133	-23.6389	-25.3486	-26.3204	-25.4846	-22.0674	-17.2068	-12.4446
-4	-1.09352	-1.19112	-1.26095	-1.32087	-1.38874	-1.48216	-1.59375	-1.67149	-1.67647	-1.63287	-1.57486	-1.5068	-1.42087	-1.32914	-1.25992	-1.19046	-1.01504	-0.658917	-0.16843	0.386367	0.936026	1.41324	1.77919	2.01757	2.14293	2.21349	2.2677	2.2789	2.22464	2.17163	2.21729	2.44481	2.91365	3.14347	1.95478	-1.18923	-5.10271	-8.58597	-11.7158	-14.9253	-18.1076	-20.8271	-22.8783	-24.3291	-24.9656	-23.9106	-20.5536	-15.8935	-11.276
-3	-1.03552	-1.11182	-1.15473	-1.19333	-1.25668	-1.37337	-1.52825	-1.62787	-1.60777	-1.53523	-1.49523	-1.48747	-1.47441	-1.4341	-1.35802	-1.22837	-1.01176	-0.683634	-0.251671	0.264883	0.812607	1.32539	1.75182	2.05238	2.21558	2.26999	2.24464	2.1611	2.04187	1.92222	1.84188	1.83978	1.94391	1.77859	0.445179	-2.45604	-5.99083	-9.19628	-12.0063	-14.6209	-17.0376	-19.1275	-20.7563	-21.7853	-21.9402	-20.6443	-17.5305	-13.3617	-9.15247
-2	-0.924471	-0.980277	-1.00311	-1.02867	-1.09265	-1.23014	-1.41987	-1.53974	-1.50754	-1.41972	-1.39597	-1.43509	-1.4825	-1.49721	-1.4503	-1.32499	-1.12339	-0.846916	-0.489368	-0.0488231	0.439062	0.923647	1.35512	1.68477	1.88468	1.95699	1.91818	1.81847	1.70527	1.57598	1.41429	1.25587	1.16322	0.841084	-0.470159	-3.07843	-6.08538	-8.59012	-10.6219	-12.481	-14.2013	-15.6509	-16.7098	-17.2742	-17.1247	-15.7824	-12.9592	-9.38715	-6.01358
-1	-0.794511	-0.816347	-0.822042	-0.843128	-0.911138	-1.05699	-1.25548	-1.38098	-1.34943	-1.26135	-1.24207	-1.29819	-1.38327	-1.45511	-1.47552	-1.41997	-1.28564	-1.07356	-0.790572	-0.446782	-0.065939	0.322634	0.687933	0.997792	1.22584	1.35413	1.38082	1.34735	1.2916	1.18773	0.994979	0.772532	0.639523	0.353883	-0.796138	-3.0518	-5.4003	-6.8837	-7.80376	-8.80508	-9.90189	-10.7232	-11.1164	-11.1909	-10.872	-9.64167	-7.17873	-4.32059	-2.12178
0	-0.712394	-0.667741	-0.655827	-0.68614	-0.768166	-0.91097	-1.08501	-1.19168	-1.16579	-1.08617	-1.05342	-1.09293	-1.19493	-1.32384	-1.42243	-1.44929	-1.38954	-1.24033	-1.0291	-0.787584	-0.536492	-0.291328	-0.0555326	0.176466	0.397023	0.579084	0.701366	0.763017	0.764391	0.692339	0.533091	0.326672	0.14417	-0.183755	-1.13864	-2.81182	-4.2674	-4.67316	-4.5274	-4.67317	-5.09506	-5.25481	-4.96958	-4.48076	-3.85158	-2.69401	-0.781019	1.11278	2.05079
1	-0.679918	-0.549792	-0.518553	-0.564022	-0.664022	-0.796238	-0.926099	-0.997099	-0.973612	-0.902189	-0.845496	-0.85065	-0.954158	-1.12826	-1.29065	-1.38156	-1.38026	-1.28446	-1.13888	-0.993462	-0.872155	-0.786157	-0.711562	-0.598095	-0.426104	-0.221164	-0.0202607	0.117521	0.141757	0.0739294	-0.043596	-0.229527	-0.545086	-1.05979	-1.85231	-2.79775	-3.26118	-2.73417	-1.75117	-1.1033	-0.759549	-0.188628	0.785836	1.91657	3.03937	4.22908	5.48157	6.29076	6.10257
2	-0.618202	-0.437336	-0.386462	-0.429275	-0.529469	-0.650723	-0.755267	-0.802744	-0.769773	-0.694167	-0.62724	-0.6198	-0.718573	-0.902354	-1.09215	-1.22571	-1.27072	-1.21882	-1.1287	-1.06583	-1.05423	-1.09825	-1.15625	-1.15198	-1.04805	-0.86444	-0.645312	-0.490027	-0.488371	-0.619882	-0.830786	-1.14447	-1.63544	-2.28819	-2.9686	-3.44264	-3.2464	-2.05094	-0.393822	0.982627	2.11411	3.50791	5.28035	7.08233	8.63233	9.8586	10.6661	10.7272	9.72391
3	-0.477809	-0.310636	-0.242942	-0.255291	-0.328249	-0.442186	-0.559868	-0.61255	-0.558761	-0.465412	-0.415802	-0.436769	-0.528863	-0.675273	-0.844314	-0.995362	-1.07421	-1.05522	-1.00655	-1.0054	-1.06764	-1.18228	-1.30441	-1.3637	-1.3249	-1.20437	-1.04408	-0.946506	-1.01419	-1.28937	-1.78645	-2.43829	-3.12281	-3.77412	-4.40042	-4.84077	-4.49921	-2.91825	-0.685122	1.35997	3.24709	5.53027	8.2154	10.6588	12.425	13.6253	14.3401	14.1775	12.704
4	-0.290558	-0.168666	-0.0937524	-0.0726192	-0.112067	-0.218466	-0.358802	-0.429594	-0.366024	-0.266444	-0.24866	-0.306915	-0.382692	-0.463442	-0.57558	-0.709394	-0.795124	-0.791983	-0.767575	-0.799712	-0.894001	-1.02614	-1.15652	-1.23444	-1.23741	-1.18423	-1.11384	-1.11259	-1.27768	-1.72102	-2.53995	-3.5776	-4.5064	-5.20575	-5.82773	-6.28769	-5.8639	-3.973	-1.23389	1.43626	4.04253	7.1426	10.6294	13.6099	15.5275	16.6754	17.3036	16.9485	15.0522
5	-0.0895739	-0.00857302	0.0589397	0.0928426	0.0730141	-0.0201732	-0.161109	-0.243236	-0.198489	-0.125199	-0.139094	-0.211834	-0.255186	-0.263109	-0.29932	-0.379165	-0.436643	-0.429034	-0.410111	-0.442837	-0.526561	-0.634792	-0.735289	-0.791971	-0.795143	-0.773387	-0.769738	-0.85938	-1.13079	-1.71673	-2.74371	-4.05542	-5.30322	-6.27465	-6.93875	-7.12282	-6.26968	-3.95862	-0.763959	2.49414	5.77034	9.48238	13.4535	16.8045	18.9528	20.0657	20.3044	19.3427	16.8068
6	0.141908	0.194164	0.245645	0.276969	0.268758	0.202019	0.0932195	0.022281	0.0400955	0.0711758	0.0295912	-0.0406967	-0.043257	0.0173344	0.0508065	0.0235588	-0.00251114	0.0168972	0.0434694	0.0306038	-0.016576	-0.0722509	-0.110671	-0.106675	-0.0596124	-0.0042392	0.00615406	-0.125941	-0.50495	-1.23086	-2.38764	-3.87396	-5.45843	-6.83841	-7.6222	-7.44777	-6.04209	-3.27459	0.329867	4.0903	7.90018	11.9965	16.1814	19.7433	22.1346	23.239	22.9878	21.2623	17.9929
7	0.425992	0.462014	0.498532	0.525743	0.533844	0.513219	0.471326	0.446175	0.458795	0.458712	0.394814	0.328438	0.364212	0.481781	0.554954	0.535572	0.506342	0.530392	0.571921	0.584624	0.580323	0.593269	0.645223	0.747992	0.898349	1.07168	1.20197	1.11184	0.629762	-0.270668	-1.5616	-3.1831	-5.04663	-6.81558	-7.83197	-7.56779	-5.8734	-2.76527	1.19069	5.30223	9.40929	13.6721	17.912	21.5485	24.0738	25.1935	24.6783	22.4651	18.5998
8	0.685897	0.729338	0.766009	0.798745	0.830378	0.863736	0.900845	0.942308	0.98035	0.977996	0.906595	0.846862	0.919655	1.08969	1.18969	1.15982	1.11971	1.16154	1.23986	1.29422	1.34252	1.43223	1.5841	1.7982	2.07204	2.40009	2.70489	2.70798	2.14986	1.08107	-0.345647	-2.08489	-4.15693	-6.24176	-7.57584	-7.53704	-5.93068	-2.75427	1.35049	5.58991	9.7508	13.972	18.1054	21.661	24.1809	25.3224	24.7924	22.4512	18.2823
9	0.792049	0.88319	0.950988	1.00804	1.06695	1.14022	1.2322	1.33261	1.42258	1.45818	1.40743	1.36773	1.484	1.71678	1.87076	1.87778	1.88211	1.99404	2.15631	2.29299	2.4207	2.59113	2.82653	3.12638	3.49176	3.92677	4.34756	4.42316	3.84695	2.69964	1.18705	-0.652	-2.88516	-5.2196	-6.89158	-7.25954	-6.06579	-3.24462	0.592579	4.6642	8.68305	12.6645	16.4629	19.7392	22.136	23.28	22.8295	20.5967	16.5189
10	0.76938	0.940773	1.06549	1.16182	1.24806	1.34246	1.45741	1.5949	1.74182	1.83531	1.82322	1.81383	1.97594	2.27832	2.52039	2.62876	2.74316	2.9708	3.2558	3.52267	3.77697	4.05546	4.37658	4.74466	5.16494	5.64445	6.10249	6.21208	5.66767	4.53314	2.99226	1.07683	-1.27799	-3.79838	-5.76825	-6.58109	-5.97804	-3.86184	-0.685918	2.94276	6.65223	10.2184	13.4655	16.2713	18.4223	19.4936	19.0864	17.0475	13.3548
11	0.814545	1.06396	1.24287	1.37526	1.4851	1.59632	1.72634	1.881	2.04943	2.16564	2.1741	2.18683	2.37989	2.73504	3.06932	3.30596	3.54738	3.87866	4.27934	4.71196	5.16362	5.63101	6.10788	6.58602	7.07269	7.5975	8.09752	8.24542	7.73144	6.61087	5.05787	3.1003	0.672934	-1.96682	-4.14021	-5.28538	-5.20296	-3.81878	-1.41244	1.62164	4.86111	7.87356	10.4535	12.6604	14.4066	15.2424	14.7414	12.8042	9.46613
12	1.03047	1.33157	1.54392	1.69893	1.82798	1.96229	2.11619	2.27384	2.41206	2.49268	2.49181	2.51572	2.71983	3.09762	3.505	3.86573	4.21971	4.61642	5.10247	5.71334	6.41574	7.14953	7.86502	8.52152	9.12418	9.74394	10.3427	10.5622	10.0627	8.92961	7.38472	5.45271	3.03039	0.35186	-1.90741	-3.21333	-3.45873	-2.63673	-0.91733	1.4574	4.06808	6.39516	8.23278	9.74305	10.9198	11.3347	10.5766	8.5709	5.37602
13	1.30339	1.63126	1.86292	2.03524	2.18507	2.34892	2.53346	2.69187	2.78491	2.81977	2.82218	2.87847	3.09615	3.4772	3.93372	4.4028	4.86642	5.3364	5.906	6.66402	7.56634	8.51726	9.44562	10.3002	11.0798	11.8539	12.5822	12.8998	12.4666	11.4086	9.99743	8.23941	5.96599	3.36601	1.09676	-0.33345	-0.866891	-0.533315	0.544437	2.19326	4.01032	5.46187	6.38652	7.05996	7.5638	7.49118	6.44045	4.33153	1.21576
14	1.51902	1.85618	2.1029	2.29646	2.47409	2.67262	2.89076	3.05895	3.12913	3.15449	3.20783	3.34049	3.59235	3.96997	4.45138	5.00446	5.58239	6.16776	6.84018	7.68017	8.64994	9.6672	10.6916	11.7152	12.7261	13.7063	14.5626	14.9933	14.7325	13.9269	12.8463	11.4537	9.50814	7.12415	4.88308	3.25196	2.33419	2.14968	2.57776	3.4333	4.31144	4.68533	4.48545	4.17825	3.97644	3.45849	2.19023	0.0675166	-2.88114
15	1.67769	2.02587	2.29387	2.51655	2.72877	2.96495	3.2187	3.41066	3.49128	3.54389	3.66995	3.88763	4.17933	4.55458	5.04578	5.65183	6.31665	7.00474	7.76116	8.63521	9.60086	10.606	11.6585	12.8112	14.0419	15.2182	16.1824	16.7304	16.7018	16.2355	15.5535	14.5751	13.0182	10.9251	8.7645	6.94104	5.62741	4.9181	4.69048	4.73637	4.66263	3.97767	2.70588	1.47552	0.61054	-0.320823	-1.77549	-3.86258	-6.56033
16	1.80484	2.18422	2.48782	2.74855	2.9993	3.27254	3.56211	3.79272	3.91846	4.02319	4.2067	4.47416	4.79103	5.17103	5.66857	6.29375	6.98333	7.69469	8.47098	9.36098	10.3405	11.3612	12.4503	13.6913	15.055	16.3481	17.3857	18.0431	18.2381	18.0716	17.6912	17.0028	15.7516	13.9459	11.9398	10.0531	8.4613	7.27772	6.41229	5.69626	4.80526	3.33341	1.35055	-0.516839	-1.93275	-3.27991	-4.96197	-7.03835	-9.4503
17	1.87809	2.29206	2.6315	2.92647	3.20701	3.50284	3.81198	4.07578	4.25856	4.42706	4.66032	4.96054	5.29825	5.69274	6.20437	6.84226	7.53113	8.2241	8.98776	9.89486	10.9131	11.9743	13.0999	14.378	15.7786	17.098	18.1595	18.8988	19.2838	19.3552	19.169	18.6432	17.6051	16.06	14.2475	12.3919	10.6408	9.09764	7.70103	6.32903	4.77065	2.77048	0.413043	-1.8196	-3.66422	-5.39628	-7.30151	-9.38326	-11.5525
18	1.85358	2.27157	2.62237	2.92879	3.21366	3.49959	3.78949	4.05098	4.2684	4.49839	4.80317	5.16794	5.54738	5.96663	6.51015	7.1954	7.92918	8.65166	9.43976	10.3779	11.4238	12.4918	13.6018	14.8525	16.2189	17.4946	18.5171	19.2874	19.8265	20.1049	20.074	19.6675	18.8088	17.5024	15.8588	14.0152	12.1588	10.4342	8.72965	6.86029	4.73219	2.31295	-0.277383	-2.74208	-4.91296	-6.9311	-8.95154	-11.0035	-13.061
19	1.77535	2.16544	2.50517	2.80595	3.07915	3.33612	3.58219	3.81196	4.03391	4.30976	4.69881	5.15543	5.59342	6.04102	6.62312	7.37738	8.19633	9.00321	9.85928	10.8346	11.8799	12.9064	13.9453	15.1181	16.4094	17.6029	18.5447	19.2994	19.9411	20.3801	20.4744	20.1671	19.4595	18.3469	16.8157	14.9374	12.9987	11.2299	9.40813	7.19699	4.60197	1.83999	-0.908827	-3.51138	-5.884	-8.04739	-10.0526	-12.024	-14.0682
20	1.77468	2.13616	2.47124	2.77953	3.06065	3.31422	3.54267	3.75341	3.96877	4.2623	4.70096	5.2189	5.69885	6.16473	6.76003	7.53802	8.4007	9.27116	10.1819	11.1726	12.1913	13.1572	14.1144	15.2006	16.4097	17.5257	18.4006	19.1236	19.7884	20.2799	20.418	20.1518	19.5183	18.5043	17.0294	15.1281	13.133	11.3136	9.38435	6.92869	4.0324	1.08821	-1.68328	-4.2683	-6.65455	-8.80684	-10.7256	-12.5856	-14.5625
21	1.88858	2.23287	2.58402	2.92916	3.25539	3.54991	3.8067	4.03186	4.24895	4.53901	4.97711	5.50014	5.9904	6.45971	7.02977	7.75577	8.58034	9.45157	10.3669	11.3263	12.2836	13.181	14.0713	15.0892	16.2313	17.2923	18.1287	18.8139	19.4271	19.8624	19.9572	19.6648	19.0172	18.0006	16.5396	14.6583	12.6395	10.7108	8.61729	5.99656	2.99287	0.0583088	-2.5856	-4.99245	-7.20583	-9.21224	-11.018	-12.7539	-14.5443
22	1.96871	2.28061	2.65326	3.052	3.44216	3.78931	4.07836	4.32888	4.57417	4.88354	5.31901	5.83005	6.32106	6.79167	7.32258	7.96394	8.71254	9.55021	10.4268	11.2906	12.1211	12.9148	13.7367	14.7023	15.792	16.7905	17.5507	18.1613	18.7159	19.1047	19.155	18.8186	18.1326	17.093	15.6399	13.7954	11.7954	9.82827	7.67555	5.03256	2.0734	-0.738042	-3.18904	-5.36582	-7.34813	-9.16335	-10.8408	-12.4508	-14.0455
23	1.90494	2.15463	2.54046	2.99349	3.44476	3.82586	4.11652	4.38269	4.68959	5.06826	5.53458	6.04844	6.54782	7.02681	7.52757	8.09433	8.77214	9.56899	10.3759	11.082	11.7148	12.3571	13.0951	14.0138	15.0558	15.9578	16.5604	17.0418	17.5799	18.0145	18.081	17.7246	17.0332	16.0217	14.6058	12.7975	10.8662	9.02966	7.04246	4.5591	1.7518	-0.893612	-3.15984	-5.14923	-6.95569	-8.6137	-10.1563	-11.6466	-13.1314
24	1.80875	2.01313	2.4084	2.89916	3.38999	3.78629	4.06719	4.34377	4.71097	5.15772	5.65009	6.15868	6.6573	7.14053	7.62104	8.1341	8.75037	9.49138	10.2137	10.7733	11.234	11.7395	12.3873	13.2365	14.1998	14.9806	15.416	15.7644	16.2774	16.7474	16.8258	16.4595	15.7962	14.8657	13.5386	11.8069	9.99124	8.35644	6.62491	4.39676	1.82362	-0.608454	-2.68691	-4.52496	-6.21514	-7.76255	-9.17844	-10.5549	-11.9814
25	1.81967	2.04717	2.45584	2.95341	3.44764	3.84707	4.13428	4.42427	4.81086	5.26383	5.73061	6.19692	6.66536	7.13453	7.59993	8.08216	8.64233	9.30122	9.94083	10.4423	10.8584	11.308	11.8729	12.6035	13.4237	14.0762	14.4217	14.6915	15.1086	15.4797	15.4854	15.0963	14.4801	13.664	12.4883	10.9172	9.25702	7.76813	6.20992	4.22649	1.94561	-0.211967	-2.07492	-3.76872	-5.37685	-6.85148	-8.16117	-9.42852	-10.7904
26	1.8875	2.18175	2.60609	3.09034	3.56435	3.95857	4.26003	4.55699	4.92133	5.32954	5.74178	6.15397	6.57751	7.0151	7.46211	7.92772	8.44357	9.02009	9.59426	10.1007	10.5526	10.9951	11.4806	12.0654	12.7121	13.2473	13.5696	13.8083	14.0879	14.275	14.1605	13.7441	13.1662	12.4422	11.4214	10.0541	8.57131	7.1759	5.70959	3.93083	1.94652	0.0739625	-1.57076	-3.11045	-4.61397	-5.99955	-7.20841	-8.37756	-9.66696
27	1.8805	2.22628	2.66307	3.13639	3.59177	3.97518	4.27506	4.55578	4.87384	5.22981	5.61166	6.00598	6.39969	6.79589	7.21148	7.66093	8.1541	8.6891	9.22838	9.73168	10.1866	10.5943	10.9932	11.4487	11.9548	12.4008	12.7109	12.929	13.0988	13.1432	12.9507	12.5244	11.9449	11.2224	10.2737	9.07537	7.76866	6.47666	5.10067	3.49314	1.7448	0.0900099	-1.38064	-2.74714	-4.05775	-5.26835	-6.35557	-7.44619	-8.67848
28	1.82809	2.19204	2.64457	3.12886	3.5881	3.96591	4.24727	4.49107	4.7557	5.07043	5.4509	5.85988	6.23964	6.58971	6.95832	7.37845	7.85603	8.38136	8.90312	9.36794	9.76242	10.0918	10.4001	10.7602	11.1777	11.5605	11.8379	12.0206	12.123	12.1006	11.8911	11.4776	10.874	10.0933	9.14634	8.06068	6.90553	5.73164	4.46284	2.99867	1.41617	-0.100051	-1.45475	-2.65915	-3.73755	-4.73002	-5.68901	-6.71335	-7.88981
29	1.9034	2.27076	2.75931	3.29283	3.79504	4.19029	4.45545	4.66145	4.88142	5.16167	5.53138	5.93732	6.29389	6.59571	6.90585	7.27013	7.70309	8.19681	8.68164	9.08555	9.40045	9.64605	9.87591	10.1681	10.5277	10.8537	11.069	11.1872	11.2292	11.1676	10.9584	10.5701	9.98058	9.20125	8.28677	7.28755	6.23621	5.14832	3.96661	2.62237	1.17596	-0.233464	-1.51441	-2.63269	-3.5906	-4.46463	-5.33898	-6.28737	-7.36183
30	2.13355	2.49868	3.03806	3.64659	4.21914	4.65137	4.90961	5.08667	5.27545	5.52268	5.85429	6.21817	6.53141	6.78497	7.03291	7.31952	7.67008	8.08577	8.49733	8.8316	9.08031	9.26348	9.43635	9.67953	9.99235	10.2558	10.3845	10.4137	10.3883	10.2894	10.0763	9.72143	9.2065	8.53285	7.72685	6.81642	5.82906	4.78406	3.65929	2.42557	1.12129	-0.173686	-1.39841	-2.51483	-3.50691	-4.40472	-5.24918	-6.10191	-7.0166
31	2.28932	2.63744	3.19816	3.84636	4.45696	4.90576	5.15125	5.29985	5.45653	5.66648	5.95215	6.26535	6.53004	6.73659	6.93213	7.15457	7.42414	7.74326	8.06334	8.33186	8.53611	8.68212	8.81716	9.01859	9.28083	9.47752	9.52341	9.47504	9.39949	9.28267	9.08291	8.77611	8.35051	7.79968	7.1239	6.32768	5.4251	4.4329	3.37376	2.27142	1.14037	-0.0102818	-1.15861	-2.26764	-3.30207	-4.23223	-5.04431	-5.7927	-6.54101
32	2.19652	2.50646	3.02755	3.63656	4.21025	4.62625	4.84154	4.9551	5.06745	5.23219	5.48104	5.76098	5.98554	6.14821	6.31053	6.50769	6.72899	6.96048	7.19094	7.40846	7.59324	7.72567	7.83645	7.99357	8.19244	8.32242	8.31259	8.22659	8.13711	8.03432	7.87925	7.63712	7.2768	6.79487	6.2238	5.57848	4.82375	3.93496	2.97993	2.04721	1.1295	0.161708	-0.864429	-1.88968	-2.85651	-3.71968	-4.45166	-5.0973	-5.71493
33	1.94792	2.20712	2.65171	3.17368	3.66506	4.01858	4.19358	4.26858	4.32946	4.44428	4.66209	4.9209	5.11478	5.2406	5.3826	5.57568	5.77098	5.9328	6.09074	6.27743	6.46165	6.59101	6.67841	6.78585	6.91699	6.98938	6.95222	6.86217	6.78256	6.70754	6.6053	6.42721	6.11466	5.67284	5.18993	4.70579	4.12559	3.3697	2.54096	1.78496	1.07974	0.302149	-0.574916	-1.46442	-2.29161	-3.02367	-3.64478	-4.19028	-4.70523
34	1.692	1.8997	2.26655	2.70026	3.10856	3.39978	3.5357	3.57378	3.58453	3.64942	3.83437	4.07234	4.24334	4.34375	4.46878	4.65231	4.82466	4.93995	5.05673	5.23699	5.43158	5.55293	5.60362	5.6547	5.72581	5.75978	5.72029	5.64616	5.58126	5.52319	5.45087	5.31498	5.0487	4.66348	4.27278	3.92581	3.49406	2.86656	2.1603	1.54691	1.00194	0.38237	-0.346953	-1.093	-1.77905	-2.38097	-2.89035	-3.33744	-3.75959
35	1.57725	1.74448	2.068	2.4588	2.82791	3.08686	3.19621	3.2042	3.17464	3.1943	3.33694	3.54253	3.69684	3.78765	3.88948	4.03131	4.16459	4.26168	4.38288	4.58537	4.7933	4.88623	4.8727	4.85939	4.89025	4.91503	4.8948	4.84295	4.77866	4.70212	4.60576	4.46906	4.26352	3.99664	3.72286	3.45476	3.09261	2.55497	1.94146	1.39532	0.906919	0.3737	-0.237426	-0.876612	-1.49049	-2.02834	-2.45508	-2.80455	-3.12567
36	1.75215	1.90172	2.25198	2.69185	3.11027	3.39685	3.50345	3.49333	3.44176	3.42558	3.50888	3.65869	3.80089	3.90229	3.96512	4.00643	4.06533	4.1777	4.36316	4.6208	4.83706	4.8657	4.74625	4.65916	4.68165	4.73654	4.75377	4.71692	4.62019	4.46519	4.25976	4.05805	3.94372	3.9022	3.79065	3.50888	3.0847	2.56437	1.98789	1.39242	0.805522	0.247468	-0.303218	-0.916412	-1.59762	-2.20254	-2.60565	-2.85742	-3.05115
[truncated: 22 more columns]
