# Supplementary material for: Strong confinement of active microalgae leads to inversion of vortex flow and enhanced mixing
Source: eLife. 2021 Nov 22;10:e67663. doi: 10.7554/eLife.67663 (PMC8758135; doi:10.7554/eLife.67663)
Supplement: Figure 4—source data 1. [file elife-67663-fig4-data1.xlsx]

## Sheet: Sheet1
Figure 4A: Theoretical H10 2-Stokeslet Brinkman flow
The [X,Y] meshgrid for flow-field plots ranges from -33 to 37 micron in X and -37 to 36 micron in Y. Gridsize is 1 micron. i.e. [X,Y] = meshgrid [-33:1:37,-37:1:36] micron.
Cell centre is at the origin of this meshgrid i.e. at [0,0].
X-component of velocity field (v_x) for H10 2-Stokeslet Brinkman flow
Y↓ & X→	-33	-32	-31	-30	-29	-28	-27	-26	-25	-24	-23	-22	-21	-20	-19	-18	-17	-16	-15	-14	-13	-12	-11	-10	-9	-8	-7	-6	-5	-4	-3	-2	-1	0	1	2	3	4	5	6	7	8	9	10	11	12	13	14	15
-37	-0.0038704	-0.0034903	-0.00306858	-0.00260012	-0.00207982	-0.00150254	-0.000863187	-0.000156628	0.000622315	0.00147972	0.00242229	0.00345676	0.00458989	0.00582869	0.00718024	0.0086516	0.0102492	0.0119782	0.0138436	0.0158502	0.0179989	0.0202874	0.0227133	0.0252725	0.0279506	0.0307299	0.0335927	0.0365149	0.0394595	0.0423873	0.0452591	0.0480281	0.050641	0.0530439	0.0551842	0.057016	0.0584961	0.0595815	0.0602389	0.0604606	0.0602425	0.0595813	0.0584933	0.0570156	0.0551862	0.0530445	0.05064	0.048027	0.0452594
-36	-0.00461903	-0.00426308	-0.00386569	-0.00342126	-0.00292425	-0.00236906	-0.00175015	-0.00106192	-0.000298732	0.000546244	0.00148065	0.00251214	0.00364851	0.00489815	0.00626964	0.00777154	0.00941196	0.0111981	0.0131372	0.0152361	0.0174977	0.0199218	0.0225081	0.0252542	0.0281469	0.0311691	0.0343038	0.037526	0.0407937	0.0440628	0.0472885	0.0504172	0.053387	0.0561357	0.0586018	0.0607303	0.062468	0.0637622	0.0645686	0.0648639	0.0646283	0.0638436	0.0625325	0.0607619	0.0586007	0.0561167	0.053368	0.0504083	0.0472915
-35	-0.00540914	-0.00508138	-0.00471274	-0.0042972	-0.00382875	-0.00330136	-0.00270902	-0.00204572	-0.00130533	-0.000480241	0.000438173	0.00145858	0.00258987	0.00384203	0.00522536	0.00675017	0.00842659	0.0102644	0.0122734	0.014463	0.016839	0.0194039	0.0221604	0.0251086	0.0282365	0.0315279	0.0349663	0.0385258	0.0421597	0.0458185	0.0494521	0.0529976	0.0563803	0.059525	0.0623573	0.0648091	0.0668142	0.0683069	0.0692329	0.0695674	0.0692903	0.0683831	0.0668735	0.0648383	0.0623569	0.0595078	0.0563623	0.0529886	0.0494548
-34	-0.00623924	-0.00594379	-0.00560844	-0.00522676	-0.00479233	-0.00429872	-0.00373948	-0.00310818	-0.00239827	-0.00160135	-0.000707776	0.000292135	0.00140843	0.00265282	0.00403752	0.00557475	0.00727692	0.00915683	0.0112273	0.0135009	0.0159869	0.0186917	0.0216215	0.0247801	0.0281575	0.0317387	0.035509	0.0394418	0.0434859	0.0475869	0.0516892	0.0557188	0.0595842	0.0631933	0.0664547	0.0692826	0.0715934	0.0733038	0.0743483	0.0747079	0.0743705	0.0733257	0.0716059	0.0692896	0.0664572	0.0631903	0.0595783	0.0557138	0.0516897
-33	-0.00710786	-0.00684888	-0.00655145	-0.00620876	-0.00581402	-0.00536042	-0.00484117	-0.00424947	-0.00357835	-0.00281869	-0.00195984	-0.000991125	9.86563e-05	0.00132304	0.00269625	0.00423253	0.00594679	0.00785524	0.00997423	0.0123199	0.0149058	0.017743	0.0208426	0.0242131	0.0278476	0.031734	0.0358604	0.040201	0.0447006	0.0493	0.0539389	0.0585303	0.0629623	0.0671223	0.070898	0.0741809	0.0768643	0.078841	0.0800312	0.0804219	0.0800108	0.078797	0.0768196	0.0741606	0.070904	0.0671369	0.0629712	0.05853	0.0539365
-32	-0.00801351	-0.00779527	-0.00754047	-0.00724202	-0.00689281	-0.00648576	-0.00601376	-0.00546973	-0.00484637	-0.00413388	-0.00332068	-0.00239514	-0.00134497	-0.000154801	0.00119167	0.00271074	0.00442	0.00633947	0.00848941	0.01089	0.0135597	0.0165157	0.019775	0.0233519	0.0272447	0.0314463	0.0359494	0.0407308	0.0457321	0.0508902	0.0561404	0.0613814	0.066478	0.0712935	0.0756913	0.0795343	0.0826853	0.085007	0.086398	0.0868461	0.0863532	0.0849228	0.0826043	0.0794963	0.0756997	0.07132	0.0664962	0.0613831	0.0561356
-31	-0.00895471	-0.00878154	-0.00857419	-0.00832535	-0.00802772	-0.00767401	-0.00725692	-0.00676912	-0.00620312	-0.00554853	-0.00479292	-0.00392384	-0.00292799	-0.00178819	-0.000486099	0.000996641	0.0026804	0.00458936	0.00674808	0.00918114	0.011913	0.0149678	0.01837	0.0221411	0.0262868	0.0308078	0.0357046	0.0409584	0.0465087	0.0522896	0.0582327	0.0642216	0.0700946	0.0756886	0.0808388	0.0853729	0.0891152	0.09189	0.0935651	0.0941172	0.0935397	0.0918288	0.0890497	0.0853415	0.080847	0.0757122	0.0701086	0.0642193	0.0582274
-30	-0.00992997	-0.00980626	-0.00965125	-0.00945755	-0.00921774	-0.00892445	-0.00857026	-0.00814778	-0.00764937	-0.00706419	-0.00637915	-0.0055811	-0.00465587	-0.00358456	-0.00234686	-0.000922454	0.000711883	0.00258479	0.0047255	0.00716337	0.00992966	0.0130571	0.0165787	0.0205246	0.0249113	0.0297506	0.035054	0.0408101	0.0469578	0.0534293	0.060154	0.0669993	0.0737749	0.0802884	0.0863441	0.0917265	0.0962121	0.0995773	0.101647	0.10237	0.10171	0.0996382	0.0962435	0.0917399	0.0863477	0.0802859	0.0737633	0.0669837	0.0601509
-29	-0.010937	-0.0108671	-0.0107693	-0.0106362	-0.0104605	-0.0102348	-0.00995172	-0.00960391	-0.00918373	-0.00868008	-0.00807937	-0.00736797	-0.00653104	-0.00554814	-0.00439717	-0.00305603	-0.00149869	0.000308135	0.00239853	0.00480687	0.00757211	0.0107369	0.0143441	0.0184344	0.0230383	0.0281825	0.0338936	0.0401713	0.0469575	0.0541862	0.0617877	0.0696131	0.0774396	0.0850415	0.092187	0.098605	0.104008	0.10811	0.110678	0.11162	0.110862	0.10834	0.104174	0.09868	0.0921836	0.085003	0.077393	0.0695794	0.0617875
-28	-0.0119723	-0.0119605	-0.0119245	-0.0118574	-0.0117519	-0.0116007	-0.0113968	-0.011133	-0.0108018	-0.010392	-0.00988985	-0.00928146	-0.00855161	-0.00767862	-0.00663894	-0.00540897	-0.00396015	-0.00225468	-0.000253739	0.00208201	0.00479989	0.00795376	0.0115977	0.0157847	0.0205625	0.0259769	0.0320736	0.0388688	0.0463159	0.0543596	0.0629395	0.0718906	0.0809497	0.0898501	0.0983137	0.10599	0.112499	0.117463	0.120574	0.121716	0.120796	0.117735	0.112689	0.106071	0.0983074	0.0898106	0.0808995	0.0718495	0.0629358
-27	-0.0130325	-0.0130826	-0.013113	-0.0131168	-0.0130873	-0.0130176	-0.0129009	-0.0127304	-0.0124989	-0.0121955	-0.0118066	-0.0113182	-0.0107153	-0.00997534	-0.00907371	-0.00798582	-0.00668103	-0.00511748	-0.00325203	-0.00104083	0.00157238	0.00465388	0.00827027	0.0124884	0.0173769	0.0230046	0.0294405	0.0367248	0.0448356	0.0537427	0.0634091	0.0736538	0.0841619	0.094613	0.104668	0.113861	0.121678	0.127605	0.131244	0.132493	0.131296	0.127605	0.121622	0.113817	0.10467	0.0946546	0.0841818	0.0736325	0.0633878
-26	-0.0141137	-0.0142295	-0.0143303	-0.0144099	-0.014462	-0.0144803	-0.0144586	-0.0143904	-0.0142693	-0.0140849	-0.0138239	-0.0134731	-0.0130177	-0.0124349	-0.0116999	-0.0107875	-0.00966583	-0.00828958	-0.0066122	-0.00458598	-0.00214566	0.000788324	0.00429597	0.00845927	0.0133712	0.0191285	0.0258278	0.0335416	0.0422898	0.0520857	0.062933	0.0746388	0.0868269	0.0991142	0.111086	0.122119	0.131509	0.138552	0.142731	0.144004	0.142398	0.137953	0.130926	0.121809	0.111106	0.099324	0.0869961	0.0746664	0.062879
-25	-0.0152111	-0.0153958	-0.0155708	-0.0157304	-0.015869	-0.0159812	-0.0160614	-0.016104	-0.0161032	-0.0160494	-0.0159305	-0.015734	-0.0154462	-0.0150447	-0.014505	-0.0138026	-0.012905	-0.0117648	-0.010333	-0.00855945	-0.00637066	-0.00367463	-0.000378756	0.003614	0.00842521	0.0141848	0.0210227	0.029052	0.0383497	0.0489884	0.061028	0.0742807	0.0883268	0.102738	0.117032	0.130391	0.141857	0.150478	0.155556	0.157052	0.155023	0.14954	0.14095	0.1299	0.11705	0.10306	0.0885993	0.074338	0.0609469
-24	-0.0163197	-0.0165762	-0.0168284	-0.0170715	-0.017301	-0.0175122	-0.0177006	-0.0178614	-0.0179899	-0.0180776	-0.0181138	-0.0180877	-0.0179865	-0.0177897	-0.0174742	-0.0170169	-0.0163859	-0.0155334	-0.0144096	-0.0129632	-0.0111149	-0.00876296	-0.00580481	-0.00212999	0.00241624	0.00800367	0.0148021	0.0229737	0.0326643	0.0440174	0.057163	0.0719495	0.0879631	0.10478	0.121891	0.138244	0.152567	0.16359	0.170343	0.172607	0.170283	0.163291	0.152134	0.137934	0.121847	0.104984	0.0881392	0.071958	0.0570857
-23	-0.0174343	-0.017765	-0.0180969	-0.0184265	-0.0187504	-0.0190651	-0.019367	-0.0196527	-0.0199184	-0.0201574	-0.0203609	-0.0205198	-0.0206236	-0.0206542	-0.0205912	-0.0204142	-0.0200936	-0.0195829	-0.0188336	-0.0177952	-0.016386	-0.0144991	-0.0120264	-0.00884727	-0.00476955	0.0004232	0.00694747	0.0150222	0.0248719	0.0367215	0.0507825	0.0669869	0.0850059	0.104501	0.125	0.14518	0.163375	0.177921	0.18744	0.191273	0.188874	0.179745	0.164629	0.145601	0.124804	0.104233	0.0847805	0.0668294	0.0507591
-22	-0.0185493	-0.0189557	-0.0193691	-0.0197874	-0.0202083	-0.0206296	-0.0210492	-0.0214648	-0.0218741	-0.0222723	-0.0226529	-0.0230093	-0.0233336	-0.0236113	-0.023826	-0.0239612	-0.0239912	-0.0238734	-0.0235633	-0.0230143	-0.0221465	-0.0208527	-0.019025	-0.0165371	-0.0131635	-0.00864433	-0.00271967	0.00489109	0.0145134	0.0264786	0.041106	0.0584724	0.0784278	0.100814	0.125264	0.150075	0.17301	0.191831	0.20461	0.2102	0.207576	0.195786	0.175899	0.151142	0.124849	0.100083	0.0778459	0.0581844	0.0411419
-21	-0.0196586	-0.0201416	-0.0206375	-0.0211455	-0.0216649	-0.0221949	-0.0227347	-0.0232836	-0.0238406	-0.0244033	-0.024968	-0.0255312	-0.026088	-0.0266286	-0.0271414	-0.0276149	-0.0280294	-0.0283497	-0.0285391	-0.0285586	-0.0283345	-0.027765	-0.0267475	-0.0251575	-0.0227518	-0.019246	-0.0143557	-0.00773804	0.00107629	0.012573	0.0272291	0.0453414	0.0670385	0.0924429	0.121352	0.151466	0.179649	0.202766	0.218201	0.224652	0.22102	0.2063	0.181936	0.152004	0.120704	0.0918905	0.0667447	0.0452171	0.027251
-20	-0.0207561	-0.0213157	-0.0218942	-0.0224922	-0.0231105	-0.0237498	-0.0244109	-0.0250945	-0.0258013	-0.0265314	-0.0272846	-0.0280606	-0.0288583	-0.0296731	-0.0304996	-0.0313321	-0.0321588	-0.0329564	-0.0337005	-0.0343644	-0.034886	-0.0351744	-0.0351381	-0.0346635	-0.0335171	-0.0314242	-0.0281096	-0.0231722	-0.0159389	-0.00570097	0.00824571	0.0265089	0.0496064	0.0780526	0.111862	0.147819	0.181422	0.208167	0.224617	0.230009	0.223994	0.206305	0.178801	0.14562	0.111013	0.0789114	0.0508126	0.0270892	0.0081081
-19	-0.0218355	-0.0224712	-0.0231315	-0.0238187	-0.024535	-0.0252829	-0.0260647	-0.0268825	-0.0277389	-0.0286367	-0.0295792	-0.0305699	-0.0316116	-0.0327063	-0.0338553	-0.0350601	-0.0363185	-0.0376224	-0.0389626	-0.0403283	-0.0416768	-0.04294	-0.0440487	-0.0449133	-0.0453312	-0.0450609	-0.0438602	-0.0412967	-0.0365268	-0.0286531	-0.0167703	0.00018533	0.0234254	0.0541673	0.0928822	0.135215	0.174891	0.205635	0.222943	0.226762	0.217728	0.196543	0.165616	0.129182	0.0915687	0.0568053	0.0266475	0.00180183	-0.0170311
-18	-0.0228909	-0.0236014	-0.0243418	-0.0251162	-0.0259285	-0.0267826	-0.0276824	-0.0286319	-0.0296352	-0.0306978	-0.0318265	-0.0330283	-0.0343102	-0.0356818	-0.037153	-0.0387341	-0.0404334	-0.0422567	-0.0442094	-0.046296	-0.0485067	-0.05082	-0.0532141	-0.0556427	-0.0579253	-0.059835	-0.0611444	-0.061462	-0.0600416	-0.0560905	-0.0487703	-0.0363124	-0.0160798	0.0145979	0.057315	0.106706	0.154638	0.192973	0.215659	0.22188	0.211626	0.185013	0.145393	0.0995783	0.0545545	0.0166666	-0.0126254	-0.0341164	-0.0486136
-17	-0.0239161	-0.0246993	-0.0255174	-0.026376	-0.0272806	-0.0282369	-0.0292504	-0.0303268	-0.0314718	-0.0326933	-0.0340012	-0.0354049	-0.0369158	-0.0385527	-0.0403367	-0.0422886	-0.0444273	-0.0467674	-0.0493231	-0.05211	-0.05517	-0.058566	-0.0623615	-0.0665796	-0.0710214	-0.075412	-0.0794767	-0.0829841	-0.0857963	-0.0877877	-0.0887066	-0.0857235	-0.073603	-0.0470174	-0.00214005	0.0551491	0.115108	0.167988	0.205456	0.222736	0.215602	0.180168	0.121385	0.0536744	-0.00807867	-0.0507005	-0.0741011	-0.0842296	-0.0870667
-16	-0.0249053	-0.0257584	-0.0266508	-0.0275895	-0.0285818	-0.0296349	-0.0307559	-0.0319522	-0.0332312	-0.0346026	-0.0360784	-0.0376701	-0.0393929	-0.0412761	-0.0433535	-0.0456588	-0.0482202	-0.0510553	-0.0541804	-0.0576174	-0.0614768	-0.0659411	-0.071195	-0.0773552	-0.0841661	-0.0912445	-0.0982097	-0.105121	-0.112995	-0.122969	-0.135941	-0.147827	-0.149898	-0.133248	-0.0908929	-0.028303	0.0440987	0.115875	0.176157	0.212988	0.214242	0.168498	0.0827106	-0.0164857	-0.101491	-0.148178	-0.158981	-0.148593	-0.131768
-15	-0.0258532	-0.0267725	-0.0277349	-0.0287492	-0.0298239	-0.0309675	-0.0321887	-0.0334959	-0.0348981	-0.0364068	-0.0380357	-0.0397986	-0.0417137	-0.0438196	-0.0461608	-0.0487818	-0.0517201	-0.0549994	-0.0586422	-0.0626795	-0.0672838	-0.0727428	-0.0793476	-0.0873061	-0.09637	-0.106135	-0.116201	-0.126958	-0.140509	-0.159181	-0.18498	-0.213369	-0.233699	-0.235088	-0.208583	-0.157694	-0.0908891	-0.0166563	0.0540258	0.10392	0.114822	0.0694731	-0.0246482	-0.133571	-0.222025	-0.25938	-0.250481	-0.216551	-0.178893
-14	-0.0267551	-0.0277353	-0.0287631	-0.029848	-0.0309993	-0.0322265	-0.033539	-0.0349462	-0.0364577	-0.0380872	-0.0398511	-0.0417658	-0.0438523	-0.0461533	-0.0487179	-0.0515951	-0.0548326	-0.0584748	-0.0625662	-0.06716	-0.0724564	-0.078775	-0.0864388	-0.0957128	-0.106542	-0.118762	-0.132214	-0.147544	-0.167148	-0.193651	-0.229411	-0.271379	-0.311451	-0.341334	-0.353755	-0.348056	-0.326213	-0.290215	-0.245619	-0.206938	-0.190073	-0.210177	-0.262908	-0.323048	-0.36435	-0.364257	-0.328398	-0.275414	-0.224008
-13	-0.027606	-0.028641	-0.0297288	-0.0308788	-0.0321006	-0.0334036	-0.0347975	-0.0362917	-0.0378962	-0.0396269	-0.0415043	-0.0435485	-0.0457834	-0.0482479	-0.0509858	-0.0540408	-0.0574723	-0.0613686	-0.0658211	-0.070926	-0.0768539	-0.0838361	-0.0921059	-0.101924	-0.113707	-0.127921	-0.145037	-0.165789	-0.191482	-0.223498	-0.263209	-0.311841	-0.370481	-0.440211	-0.520979	-0.605393	-0.683141	-0.743911	-0.780052	-0.790601	-0.775631	-0.735359	-0.673852	-0.599298	-0.520088	-0.444053	-0.374747	-0.31375	-0.262631
-12	-0.0284023	-0.0294864	-0.0306284	-0.0318375	-0.0331227	-0.034493	-0.0359577	-0.0375258	-0.0392069	-0.0410195	-0.0429877	-0.0451361	-0.0474902	-0.0500804	-0.0529387	-0.0560975	-0.0596266	-0.0636665	-0.0683657	-0.0738697	-0.0802836	-0.087679	-0.0961269	-0.105841	-0.117823	-0.133343	-0.153668	-0.179476	-0.210171	-0.244986	-0.283507	-0.332449	-0.405185	-0.515341	-0.672761	-0.862809	-1.06111	-1.24328	-1.38529	-1.46411	-1.45684	-1.34199	-1.13427	-0.887222	-0.656282	-0.49044	-0.389442	-0.330296	-0.289896
-11	-0.0291411	-0.0302693	-0.0314598	-0.0327211	-0.0340617	-0.03549	-0.0370146	-0.0386438	-0.0403871	-0.0422636	-0.0443002	-0.0465237	-0.0489599	-0.0516309	-0.0545576	-0.0577615	-0.0613177	-0.0654021	-0.0702017	-0.0758953	-0.0825276	-0.0900344	-0.0983483	-0.107631	-0.119301	-0.13521	-0.157199	-0.18584	-0.218944	-0.253963	-0.288968	-0.334629	-0.413384	-0.548121	-0.756098	-1.01816	-1.30065	-1.5699	-1.79034	-1.92166	-1.92285	-1.75523	-1.44116	-1.06845	-0.728083	-0.500134	-0.381055	-0.328706	-0.300752
-10	-0.0298194	-0.0309876	-0.0322207	-0.0335268	-0.0349138	-0.0363899	-0.0379631	-0.0396415	-0.0414338	-0.0433585	-0.045441	-0.0477068	-0.0501803	-0.0528803	-0.0558243	-0.05903	-0.0625682	-0.0666089	-0.0713328	-0.076912	-0.0833773	-0.0906444	-0.0986257	-0.107462	-0.118549	-0.133711	-0.154767	-0.182213	-0.213681	-0.246433	-0.278341	-0.319837	-0.393073	-0.520652	-0.71976	-0.972564	-1.24729	-1.51214	-1.7325	-1.86676	-1.87222	-1.70856	-1.39772	-1.0283	-0.692175	-0.470128	-0.358041	-0.312613	-0.290344
-9	-0.0304351	-0.0316395	-0.0329094	-0.0342528	-0.0356775	-0.0371914	-0.0388024	-0.0405183	-0.0423476	-0.0443058	-0.0464132	-0.0486904	-0.0511581	-0.0538379	-0.0567515	-0.0599213	-0.0634037	-0.0673203	-0.0717995	-0.076966	-0.082886	-0.0895772	-0.0970564	-0.105479	-0.115762	-0.129085	-0.146622	-0.168845	-0.194708	-0.222962	-0.252696	-0.289828	-0.346649	-0.435699	-0.566393	-0.727955	-0.901578	-1.06843	-1.20758	-1.29287	-1.29729	-1.19536	-1.00029	-0.766757	-0.551495	-0.404458	-0.323889	-0.284161	-0.25952
-8	-0.0309871	-0.032223	-0.0335242	-0.0348985	-0.0363534	-0.0378967	-0.039536	-0.0412788	-0.0431332	-0.0451105	-0.0472247	-0.0494895	-0.051921	-0.0545443	-0.0573871	-0.0604774	-0.0638528	-0.0675689	-0.0716836	-0.0762577	-0.0814021	-0.0872689	-0.094011	-0.101799	-0.110904	-0.121626	-0.134271	-0.149273	-0.167349	-0.189255	-0.21571	-0.246687	-0.281466	-0.319296	-0.3593	-0.399753	-0.438594	-0.47376	-0.502435	-0.519921	-0.521227	-0.501605	-0.46268	-0.412903	-0.361059	-0.315089	-0.276497	-0.243813	-0.215551
-7	-0.0314744	-0.0327363	-0.0340635	-0.0354633	-0.0369425	-0.0385083	-0.0401677	-0.0419276	-0.0437951	-0.0457778	-0.0478835	-0.05012	-0.052498	-0.055042	-0.0577805	-0.0607417	-0.0639441	-0.0673875	-0.0710697	-0.0749957	-0.0792901	-0.0841747	-0.0898743	-0.0965402	-0.103922	-0.111634	-0.11929	-0.127203	-0.137197	-0.151289	-0.1712	-0.192524	-0.20514	-0.198707	-0.16499	-0.109367	-0.042634	0.0243996	0.080737	0.114911	0.115383	0.0713013	-0.0101785	-0.102618	-0.178631	-0.214408	-0.21347	-0.191949	-0.166046
-6	-0.0318963	-0.0331783	-0.0345266	-0.0359473	-0.0374461	-0.0390289	-0.0407015	-0.0424698	-0.0443396	-0.0463154	-0.0484009	-0.0505996	-0.0529176	-0.0553715	-0.0579809	-0.0607655	-0.0637278	-0.0668385	-0.070065	-0.073381	-0.0768692	-0.0807004	-0.0850481	-0.0899896	-0.0950746	-0.0996723	-0.103156	-0.105601	-0.108607	-0.113975	-0.123168	-0.130843	-0.125297	-0.0945851	-0.0294349	0.0621317	0.165212	0.264886	0.346154	0.393813	0.392631	0.328288	0.210327	0.0738486	-0.0447923	-0.113794	-0.136161	-0.130963	-0.117351
-5	-0.0322528	-0.0335499	-0.034915	-0.0363523	-0.0378664	-0.0394615	-0.0411421	-0.0429124	-0.0447769	-0.0467376	-0.0487957	-0.0509518	-0.0532076	-0.0555675	-0.058037	-0.0606214	-0.0633102	-0.0660636	-0.0688384	-0.0715946	-0.0743393	-0.0771187	-0.0799797	-0.0828956	-0.0854335	-0.0870217	-0.0870905	-0.0854334	-0.0826317	-0.0793699	-0.0761143	-0.0688917	-0.0495837	-0.00991317	0.0562842	0.141508	0.232819	0.317269	0.38256	0.418036	0.413293	0.358591	0.261524	0.148245	0.0458194	-0.0219281	-0.0559501	-0.0686359	-0.0724338
-4	-0.0325439	-0.0338524	-0.0352303	-0.0366805	-0.0382059	-0.0398094	-0.0414939	-0.0432625	-0.0451177	-0.0470601	-0.0490882	-0.0512008	-0.0533953	-0.0556639	-0.0579971	-0.0603855	-0.0628072	-0.0652175	-0.0675692	-0.0698138	-0.0718804	-0.0736802	-0.0751239	-0.0760823	-0.076208	-0.0750791	-0.0722732	-0.0673414	-0.0597761	-0.0490625	-0.0346203	-0.0145353	0.0143519	0.0552485	0.110163	0.173355	0.235998	0.289265	0.325743	0.341585	0.333495	0.298457	0.240754	0.172492	0.106162	0.0529538	0.014127	-0.0136421	-0.0337016
-3	-0.03277	-0.0340871	-0.0354744	-0.0369338	-0.0384669	-0.0400756	-0.0417617	-0.0435268	-0.0453726	-0.0472975	-0.0492978	-0.0513699	-0.0535076	-0.0556938	-0.0579082	-0.0601304	-0.062328	-0.0644461	-0.0664276	-0.0682113	-0.0696721	-0.0706328	-0.0709147	-0.0703166	-0.068513	-0.0651363	-0.0598176	-0.0519775	-0.0405809	-0.0245331	-0.00276242	0.0253332	0.0599171	0.101136	0.14852	0.19761	0.242359	0.276723	0.296354	0.30118	0.291789	0.268832	0.234567	0.192978	0.148134	0.103912	0.0627503	0.0264162	-0.00332507
-2	-0.0329311	-0.0342543	-0.0356481	-0.0371135	-0.0386514	-0.0402629	-0.041949	-0.0437106	-0.0455484	-0.0474591	-0.0494369	-0.0514754	-0.0535659	-0.0556855	-0.0578074	-0.0599047	-0.0619359	-0.0638319	-0.0655206	-0.0669253	-0.0678921	-0.0682044	-0.0676438	-0.0659686	-0.0628091	-0.0577518	-0.0503821	-0.0400884	-0.0258313	-0.00651582	0.0189093	0.0506021	0.0878868	0.130055	0.175972	0.22173	0.26232	0.292735	0.309497	0.312981	0.304152	0.284006	0.254279	0.2175	0.176234	0.133054	0.0905686	0.0514022	0.0181798
-1	-0.0330276	-0.0343544	-0.0357519	-0.0372207	-0.0387611	-0.0403738	-0.0420594	-0.0438182	-0.0456506	-0.047552	-0.0495147	-0.0515308	-0.0535894	-0.0556649	-0.0577273	-0.0597466	-0.0616747	-0.0634303	-0.0649284	-0.0660793	-0.0667171	-0.0666145	-0.0655419	-0.0632394	-0.0592781	-0.0531713	-0.0444318	-0.0324606	-0.0164166	0.00457279	0.0313462	0.0640478	0.102173	0.145193	0.192153	0.239339	0.281941	0.31515	0.335333	0.34181	0.334362	0.312846	0.279167	0.237422	0.191816	0.146338	0.103327	0.0643579	0.0310018
0	-0.0330598	-0.0343878	-0.0357866	-0.0372564	-0.0387976	-0.0404107	-0.0420961	-0.043854	-0.0456845	-0.0475828	-0.0495404	-0.0515489	-0.0535966	-0.0556572	-0.0576996	-0.0596928	-0.0615866	-0.0632952	-0.0647288	-0.0657928	-0.0663182	-0.0660752	-0.064832	-0.0623231	-0.0580954	-0.0516322	-0.042416	-0.0298552	-0.0131977	0.00833003	0.0354715	0.0683627	0.106572	0.149648	0.196726	0.244284	0.287742	0.322522	0.344938	0.353553	0.347278	0.325139	0.289119	0.24437	0.196203	0.149561	0.106611	0.0682402	0.0353242
1	-0.0330277	-0.0343545	-0.0357521	-0.0372208	-0.0387614	-0.0403742	-0.0420598	-0.0438188	-0.0456514	-0.0475531	-0.0495161	-0.0515326	-0.0535917	-0.0556679	-0.0577313	-0.0597518	-0.0616817	-0.0634394	-0.0649397	-0.0660928	-0.0667334	-0.0666342	-0.0655665	-0.06327	-0.0593123	-0.0532022	-0.0444478	-0.0324492	-0.0163732	0.0046445	0.0314311	0.0640675	0.101937	0.144397	0.190439	0.236688	0.278831	0.312554	0.334369	0.342866	0.336959	0.315667	0.280848	0.237398	0.190359	0.14445	0.101897	0.0637728	0.0311475
2	-0.0329311	-0.0342544	-0.0356482	-0.0371135	-0.0386513	-0.0402628	-0.0419488	-0.0437104	-0.0455483	-0.0474592	-0.0494369	-0.051475	-0.0535645	-0.0556832	-0.057805	-0.0599039	-0.0619376	-0.0638346	-0.0655198	-0.0669139	-0.0678676	-0.0681745	-0.0676266	-0.0659865	-0.0628554	-0.0577793	-0.0503036	-0.0398348	-0.0254793	-0.00630397	0.0185943	0.0495116	0.0861768	0.128297	0.175124	0.222953	0.266907	0.302105	0.324662	0.333184	0.326663	0.304207	0.267893	0.222983	0.174892	0.128671	0.0865469	0.0494467	0.0182898
3	-0.0327699	-0.0340872	-0.0354745	-0.0369337	-0.0384666	-0.0400751	-0.041761	-0.0435262	-0.0453722	-0.0472974	-0.0492975	-0.0513685	-0.053504	-0.0556882	-0.0579024	-0.0601276	-0.0623307	-0.0644509	-0.066425	-0.0681863	-0.0696201	-0.0705719	-0.0708863	-0.0703725	-0.0686454	-0.0652534	-0.0597446	-0.0515785	-0.0400233	-0.0243221	-0.0037012	0.0229538	0.0570759	0.10011	0.152643	0.209714	0.264151	0.308782	0.33784	0.349084	0.340821	0.311536	0.264458	0.207888	0.150378	0.099708	0.057752	0.0236587	-0.00343799
4	-0.0325439	-0.0338527	-0.0352306	-0.0366806	-0.0382059	-0.0398093	-0.0414938	-0.0432626	-0.0451183	-0.0470611	-0.0490894	-0.0512015	-0.0533948	-0.0556625	-0.0579965	-0.0603889	-0.0628172	-0.0652318	-0.0675804	-0.0698102	-0.0718594	-0.0736592	-0.0751407	-0.0761843	-0.0763923	-0.0752717	-0.0723301	-0.0671459	-0.0594505	-0.0489956	-0.0354262	-0.0162122	0.0132072	0.0574706	0.119658	0.192769	0.265794	0.327716	0.369452	0.386778	0.376221	0.334632	0.267311	0.188611	0.113326	0.0546605	0.0136385	-0.014336	-0.0338891
5	-0.0322528	-0.0335498	-0.0349148	-0.0363523	-0.0378666	-0.0394619	-0.0411426	-0.0429129	-0.044777	-0.0467375	-0.0487957	-0.0509527	-0.0532103	-0.0555719	-0.0580414	-0.0606229	-0.0633065	-0.0660577	-0.0688388	-0.0716143	-0.0743826	-0.0771694	-0.0800013	-0.0828421	-0.0853116	-0.0869118	-0.0871457	-0.0857653	-0.0830604	-0.0793917	-0.0749278	-0.0659287	-0.0450049	-0.00462697	0.0606204	0.142481	0.22726	0.301254	0.352874	0.375856	0.364755	0.314585	0.23228	0.137543	0.0507006	-0.0102774	-0.0454657	-0.0632674	-0.0721288
6	-0.0318963	-0.0331775	-0.0345259	-0.0359469	-0.0374463	-0.0390296	-0.0407023	-0.0424702	-0.0443387	-0.046313	-0.0483982	-0.0505992	-0.0529223	-0.0553804	-0.0579882	-0.0607601	-0.0637015	-0.0668003	-0.0700424	-0.0734175	-0.0769766	-0.0808209	-0.0850527	-0.0897177	-0.0945482	-0.0991696	-0.103209	-0.106631	-0.110132	-0.114503	-0.12032	-0.123756	-0.11687	-0.0915675	-0.0417676	0.0255625	0.0982656	0.164175	0.212568	0.236355	0.229005	0.184472	0.10932	0.0236174	-0.0519043	-0.0990414	-0.118917	-0.121576	-0.11711
7	-0.0314743	-0.0327352	-0.0340624	-0.0354626	-0.0369426	-0.0385089	-0.0401684	-0.0419276	-0.0437934	-0.0457742	-0.0478794	-0.0501185	-0.0525027	-0.0550518	-0.0577876	-0.0607323	-0.0639077	-0.0673352	-0.0710362	-0.0750358	-0.0794193	-0.0843209	-0.0898763	-0.0961981	-0.103274	-0.111048	-0.119468	-0.128732	-0.139593	-0.152876	-0.169268	-0.186666	-0.200367	-0.205564	-0.198341	-0.18053	-0.15625	-0.129627	-0.105242	-0.0888247	-0.0862819	-0.103191	-0.136531	-0.174073	-0.203136	-0.212723	-0.204705	-0.186896	-0.167137
8	-0.0309871	-0.0322228	-0.033524	-0.0348984	-0.0363535	-0.0378969	-0.0395362	-0.041279	-0.0431331	-0.0451101	-0.0472242	-0.0494896	-0.0519225	-0.0545469	-0.0573895	-0.0604769	-0.0638474	-0.0675612	-0.0716807	-0.0762707	-0.0814351	-0.0873095	-0.0940301	-0.101762	-0.110825	-0.121595	-0.134445	-0.149809	-0.168253	-0.190356	-0.216709	-0.248081	-0.285412	-0.329646	-0.380845	-0.433359	-0.479268	-0.510651	-0.522713	-0.51851	-0.50231	-0.478317	-0.449005	-0.414994	-0.376814	-0.335208	-0.292552	-0.251972	-0.2166
9	-0.0304352	-0.0316408	-0.0329109	-0.0342537	-0.0356775	-0.0371907	-0.0388015	-0.0405183	-0.0423498	-0.0443104	-0.0464184	-0.0486924	-0.0511523	-0.0538259	-0.0567429	-0.0599333	-0.0634496	-0.0673863	-0.0718424	-0.0769181	-0.0827284	-0.0894011	-0.0970639	-0.105922	-0.116601	-0.129872	-0.146506	-0.16714	-0.192125	-0.221777	-0.256563	-0.300092	-0.358908	-0.439667	-0.546401	-0.66618	-0.779325	-0.866155	-0.912771	-0.919808	-0.890145	-0.826845	-0.737713	-0.635631	-0.533731	-0.443948	-0.369085	-0.307724	-0.258426
10	-0.0298193	-0.0309899	-0.0322232	-0.0335279	-0.0349131	-0.0363876	-0.0379603	-0.03964	-0.0414363	-0.0433653	-0.0454484	-0.0477069	-0.0501637	-0.0528498	-0.0557983	-0.0590425	-0.0626445	-0.0667201	-0.0713909	-0.0767788	-0.0830114	-0.0902208	-0.0985391	-0.108202	-0.120012	-0.134966	-0.15406	-0.178079	-0.207345	-0.242124	-0.282913	-0.334994	-0.40811	-0.512178	-0.653437	-0.814343	-0.967889	-1.08706	-1.15253	-1.16426	-1.12518	-1.03853	-0.915248	-0.774499	-0.635856	-0.51701	-0.421269	-0.345303	-0.285743
11	-0.0291409	-0.0302715	-0.0314621	-0.0327221	-0.0340608	-0.0354874	-0.0370114	-0.038642	-0.0403891	-0.0422699	-0.0443069	-0.0465227	-0.0489418	-0.0515983	-0.054529	-0.0577709	-0.0613902	-0.0655083	-0.0702523	-0.0757503	-0.0821441	-0.0895871	-0.0982326	-0.108337	-0.120719	-0.136393	-0.15637	-0.181502	-0.212296	-0.249216	-0.292955	-0.348929	-0.426958	-0.537036	-0.685329	-0.853267	-1.01244	-1.13443	-1.19925	-1.20812	-1.1655	-1.07613	-0.951218	-0.80889	-0.667623	-0.5442	-0.442465	-0.360291	-0.29552
12	-0.0284024	-0.0294877	-0.0306298	-0.0318383	-0.0331226	-0.0344923	-0.0359568	-0.0375257	-0.0392089	-0.0410238	-0.0429925	-0.0451376	-0.0474838	-0.0500677	-0.0529289	-0.0561076	-0.0596694	-0.0637282	-0.0684031	-0.0738152	-0.0801178	-0.0874905	-0.0961134	-0.106249	-0.118607	-0.134053	-0.15345	-0.177632	-0.207362	-0.243394	-0.286648	-0.341457	-0.415334	-0.515914	-0.647606	-0.793956	-0.930204	-1.03159	-1.08137	-1.0829	-1.04267	-0.967256	-0.865871	-0.750539	-0.63342	-0.525753	-0.431712	-0.352209	-0.288141
13	-0.0276061	-0.0286408	-0.0297286	-0.0308788	-0.0321009	-0.0334043	-0.0347983	-0.0362923	-0.0378963	-0.0396266	-0.0415041	-0.0435498	-0.0457875	-0.0482547	-0.0509926	-0.0540427	-0.0574657	-0.0613585	-0.0658219	-0.0709598	-0.0769288	-0.083928	-0.0921577	-0.101866	-0.113566	-0.127859	-0.145348	-0.166746	-0.193	-0.22509	-0.264059	-0.312276	-0.37335	-0.450933	-0.546625	-0.648722	-0.74023	-0.804156	-0.829884	-0.822828	-0.790876	-0.741834	-0.681287	-0.612439	-0.538379	-0.462308	-0.388278	-0.320732	-0.264116
14	-0.0267549	-0.0277338	-0.0287615	-0.029847	-0.0309993	-0.0322273	-0.0335399	-0.0349461	-0.0364554	-0.0380824	-0.0398456	-0.0417639	-0.0438588	-0.0461667	-0.0487281	-0.0515836	-0.0547854	-0.0584072	-0.0625251	-0.0672192	-0.0726375	-0.0789826	-0.086459	-0.0952802	-0.105711	-0.118033	-0.132531	-0.149702	-0.170514	-0.195994	-0.227121	-0.263862	-0.305245	-0.350258	-0.39733	-0.44125	-0.475364	-0.49302	-0.491345	-0.47696	-0.457949	-0.442145	-0.430666	-0.417443	-0.396055	-0.361214	-0.316298	-0.268687	-0.22578
15	-0.0258532	-0.0267714	-0.0277338	-0.0287486	-0.0298241	-0.0309685	-0.0321898	-0.0334963	-0.0348966	-0.0364032	-0.0380317	-0.0397978	-0.0417203	-0.0438322	-0.0461707	-0.0487733	-0.051681	-0.0549427	-0.0586077	-0.0627301	-0.0674369	-0.0729151	-0.0793531	-0.0869136	-0.0956166	-0.105433	-0.116337	-0.128568	-0.142951	-0.160386	-0.181627	-0.204436	-0.223785	-0.234538	-0.232421	-0.218733	-0.196989	-0.170715	-0.14441	-0.125028	-0.119903	-0.135984	-0.170208	-0.208787	-0.237408	-0.243684	-0.22997	-0.205423	-0.179234
16	-0.0249054	-0.0257582	-0.0266506	-0.0275895	-0.0285822	-0.0296355	-0.0307568	-0.031953	-0.0332314	-0.0346023	-0.0360781	-0.0376712	-0.0393968	-0.0412824	-0.0433594	-0.0456591	-0.048211	-0.051041	-0.0541746	-0.0576415	-0.0615365	-0.066008	-0.0712059	-0.0772309	-0.0839142	-0.0909949	-0.0982134	-0.105562	-0.113578	-0.12287	-0.133851	-0.142933	-0.142795	-0.125972	-0.0868011	-0.0312751	0.0299757	0.0863124	0.128285	0.149433	0.143757	0.105693	0.0410404	-0.0322311	-0.0955554	-0.132654	-0.144738	-0.141093	-0.131046
17	-0.0239161	-0.0246995	-0.0255176	-0.0263761	-0.0272805	-0.0282366	-0.0292501	-0.0303266	-0.031472	-0.0326941	-0.0340021	-0.0354051	-0.0369144	-0.0385501	-0.0403349	-0.0422915	-0.0444378	-0.0467828	-0.0493346	-0.0521038	-0.0551428	-0.0585384	-0.0623784	-0.0666968	-0.0712333	-0.0756267	-0.0795168	-0.0827005	-0.0853149	-0.087542	-0.0893871	-0.0872609	-0.0742173	-0.0431822	0.0109731	0.080792	0.153811	0.217558	0.261622	0.280766	0.270553	0.226938	0.156133	0.07533	0.00226074	-0.0474135	-0.0738607	-0.0845557	-0.087011
18	-0.0228909	-0.0236017	-0.0243421	-0.0251163	-0.0259282	-0.026782	-0.0276817	-0.0286314	-0.0296352	-0.0306985	-0.0318273	-0.0330277	-0.0343068	-0.035676	-0.0371478	-0.0387351	-0.0404448	-0.0422738	-0.044218	-0.0462736	-0.0484471	-0.0507533	-0.0532071	-0.0557788	-0.058194	-0.0600944	-0.0611218	-0.0609427	-0.0592764	-0.0558496	-0.0502785	-0.0399374	-0.0201067	0.0140133	0.0657167	0.128561	0.19223	0.246403	0.28266	0.29736	0.287602	0.250773	0.191792	0.123644	0.0597083	0.0118963	-0.0191207	-0.0378586	-0.0488607
19	-0.0218356	-0.0224714	-0.0231317	-0.0238188	-0.024535	-0.0252828	-0.0260644	-0.0268824	-0.0277391	-0.0286372	-0.0295797	-0.0305696	-0.0316098	-0.0327031	-0.0338521	-0.0350594	-0.0363223	-0.0376278	-0.038962	-0.0403097	-0.0416359	-0.0428898	-0.0440202	-0.0449451	-0.0454134	-0.0451167	-0.0437459	-0.0409007	-0.0359831	-0.0283696	-0.0174015	-0.00171296	0.0207232	0.0519591	0.0931812	0.139976	0.185702	0.223715	0.24866	0.25842	0.25138	0.226095	0.185603	0.137742	0.090584	0.0514126	0.0214641	-0.000815409	-0.0169949
20	-0.0207561	-0.0213157	-0.0218942	-0.0224923	-0.0231106	-0.02375	-0.0244111	-0.0250947	-0.0258016	-0.0265317	-0.027285	-0.0280612	-0.0288593	-0.0296745	-0.0305011	-0.0313333	-0.0321595	-0.032957	-0.033702	-0.0343684	-0.0348928	-0.0351811	-0.0351388	-0.0346504	-0.0334886	-0.0313877	-0.0280809	-0.0231636	-0.015931	-0.00563937	0.00844118	0.0267602	0.0495055	0.0768546	0.10859	0.141942	0.173122	0.198343	0.214585	0.220762	0.216083	0.199849	0.173692	0.141741	0.108249	0.0771448	0.0498923	0.0268166	0.00823676
21	-0.0196586	-0.0201415	-0.0206373	-0.0211454	-0.0216649	-0.022195	-0.0227349	-0.0232837	-0.0238406	-0.0244031	-0.0249679	-0.0255316	-0.0260894	-0.0266309	-0.0271438	-0.027616	-0.0280282	-0.0283479	-0.0285413	-0.0285718	-0.0283614	-0.0277979	-0.0267682	-0.0251435	-0.0227079	-0.0192159	-0.0144215	-0.00796365	0.000767238	0.0124134	0.0275889	0.0463384	0.0681745	0.0925892	0.118882	0.145104	0.168812	0.187561	0.199426	0.203795	0.200253	0.188441	0.169354	0.145439	0.119213	0.0930652	0.0683947	0.0461436	0.0272511
22	-0.0185493	-0.0189555	-0.0193689	-0.0197872	-0.0202081	-0.0206295	-0.021049	-0.0214646	-0.0218736	-0.0222716	-0.022652	-0.0230084	-0.0233331	-0.023611	-0.0238253	-0.0239588	-0.0239864	-0.023867	-0.0235581	-0.0230146	-0.0221537	-0.0208615	-0.0190233	-0.0165103	-0.0131158	-0.00860657	-0.0027491	0.00474788	0.0143006	0.0263417	0.0412812	0.0590671	0.0792168	0.101231	0.124461	0.147291	0.167721	0.183751	0.193816	0.197442	0.194326	0.184204	0.167887	0.147341	0.124584	0.10154	0.0793855	0.058952	0.0410696
23	-0.0174343	-0.017765	-0.0180969	-0.0184265	-0.0187504	-0.0190651	-0.019367	-0.0196526	-0.0199183	-0.0201573	-0.0203606	-0.0205195	-0.0206232	-0.0206536	-0.0205903	-0.0204128	-0.0200916	-0.01958	-0.0188298	-0.0177905	-0.0163803	-0.0144915	-0.0120156	-0.00883186	-0.00474992	0.00044403	0.00696388	0.0150285	0.0248675	0.0367119	0.0507795	0.0670192	0.0851284	0.104795	0.125558	0.145994	0.164296	0.178657	0.187661	0.190875	0.18802	0.178852	0.164125	0.145659	0.125326	0.104888	0.085278	0.0670429	0.0507284
24	-0.0163198	-0.0165764	-0.0168286	-0.0170717	-0.0173012	-0.0175125	-0.0177009	-0.0178619	-0.0179905	-0.0180784	-0.0181148	-0.0180887	-0.0179876	-0.017791	-0.0174759	-0.0170195	-0.0163898	-0.0155382	-0.0144144	-0.0129663	-0.0111158	-0.00876353	-0.0058094	-0.00214387	0.00239513	0.00798768	0.0148137	0.0230318	0.0327539	0.0440862	0.0571256	0.0717865	0.0878124	0.10494	0.122787	0.140191	0.155681	0.167785	0.175352	0.178032	0.175599	0.167858	0.155427	0.139793	0.122487	0.104949	0.0879252	0.0718451	0.0571346
25	-0.015211	-0.0153958	-0.0155708	-0.0157303	-0.015869	-0.0159811	-0.0160613	-0.0161039	-0.0161031	-0.0160494	-0.0159304	-0.015734	-0.0154459	-0.0150443	-0.0145048	-0.013803	-0.0129062	-0.0117666	-0.0103346	-0.00855954	-0.00636895	-0.00367313	-0.000381823	0.00360102	0.00840337	0.0141641	0.0210219	0.0290867	0.0384062	0.0490201	0.0609593	0.0740833	0.0880911	0.102676	0.117455	0.13156	0.143932	0.153509	0.159464	0.161552	0.159623	0.153546	0.143759	0.13131	0.117279	0.102691	0.0881585	0.0741068	0.0609593
26	-0.0141136	-0.0142293	-0.0143301	-0.0144097	-0.0144618	-0.01448	-0.0144582	-0.01439	-0.0142688	-0.0140842	-0.0138231	-0.0134721	-0.0130165	-0.0124335	-0.0116982	-0.0107856	-0.00966375	-0.00828726	-0.0066094	-0.00458236	-0.00214122	0.000792833	0.00429906	0.00845902	0.0133672	0.0191223	0.0258231	0.0335409	0.0422878	0.0520682	0.0628777	0.0745304	0.0866718	0.0989404	0.110942	0.12207	0.13163	0.138932	0.143437	0.145001	0.143536	0.138969	0.131577	0.122008	0.11093	0.0989902	0.0866999	0.0745043	0.0628485
27	-0.0130326	-0.0130827	-0.0131131	-0.0131169	-0.0130874	-0.0130178	-0.0129011	-0.0127306	-0.0124992	-0.0121958	-0.0118069	-0.0113186	-0.0107158	-0.00997595	-0.00907438	-0.00798646	-0.00668156	-0.00511792	-0.00325256	-0.00104172	0.00157113	0.00465287	0.00827068	0.0124917	0.017383	0.0230114	0.0294439	0.0367212	0.0448282	0.0537425	0.0634332	0.0737033	0.0842002	0.0945652	0.10443	0.113362	0.120903	0.126594	0.130084	0.131284	0.130145	0.126629	0.12091	0.113393	0.104492	0.0946247	0.084207	0.0736577	0.0633947
28	-0.0119723	-0.0119604	-0.0119245	-0.0118574	-0.0117519	-0.0116007	-0.0113969	-0.0111331	-0.0108019	-0.0103921	-0.00989001	-0.00928171	-0.008552	-0.00767917	-0.00663961	-0.00540967	-0.00396084	-0.00225547	-0.000254924	0.00207996	0.00479687	0.00795044	0.0115955	0.0157855	0.0205663	0.025981	0.0320727	0.0388591	0.0463023	0.0543577	0.0629738	0.0719691	0.0810402	0.0898793	0.0981753	0.105597	0.111807	0.116466	0.119314	0.120288	0.119355	0.116489	0.111818	0.105632	0.098233	0.0899243	0.0810408	0.0719313	0.0629449
29	-0.0109369	-0.010867	-0.0107692	-0.0106361	-0.0104604	-0.0102346	-0.00995148	-0.00960362	-0.00918339	-0.00867967	-0.0080789	-0.00736744	-0.00653046	-0.0055475	-0.00439647	-0.00305521	-0.00149774	0.00030912	0.00239936	0.00480726	0.00757187	0.0107362	0.0143432	0.018434	0.0230379	0.0281806	0.0338874	0.0401587	0.0469406	0.0541724	0.0617886	0.0696352	0.0774753	0.0850687	0.092171	0.0985111	0.103807	0.107777	0.110204	0.111033	0.110235	0.107787	0.103796	0.0985112	0.0921904	0.0850908	0.0774769	0.0696162	0.0617762
30	-0.00993023	-0.00980655	-0.00965157	-0.00945789	-0.00921812	-0.00892486	-0.0085707	-0.00814825	-0.00764986	-0.0070647	-0.00637966	-0.00558159	-0.0046563	-0.0035849	-0.00234707	-0.000922489	0.000712087	0.00258533	0.00472653	0.00716505	0.00993212	0.0130604	0.0165827	0.0205292	0.0249166	0.0297568	0.0350616	0.0408194	0.0469679	0.053438	0.0601579	0.0669988	0.0737785	0.0803127	0.0864117	0.0918508	0.0963912	0.0997942	0.101875	0.102587	0.101901	0.0997957	0.0963644	0.0918253	0.0864025	0.0803184	0.0737815	0.0669938	0.0601573
31	-0.00895508	-0.00878195	-0.00857466	-0.00832588	-0.00802832	-0.00767468	-0.00725766	-0.00676996	-0.00620405	-0.00554955	-0.00479402	-0.00392501	-0.0029292	-0.00178941	-0.000487294	0.000995501	0.00267939	0.00458862	0.00674791	0.0091819	0.0119149	0.0149711	0.0183746	0.0221466	0.0262938	0.0308175	0.0357191	0.0409792	0.0465339	0.0523134	0.058246	0.0642208	0.0700906	0.0757067	0.0809161	0.0855383	0.0893821	0.0922559	0.0940119	0.0946111	0.0940314	0.0922543	0.0893553	0.0855106	0.0809013	0.0757067	0.070093	0.0642204	0.0582491
32	-0.00801341	-0.00779517	-0.00754037	-0.00724191	-0.0068927	-0.00648564	-0.00601365	-0.00546963	-0.00484629	-0.00413383	-0.00332066	-0.00239517	-0.00134506	-0.00015496	0.0011914	0.00271031	0.00441936	0.00633862	0.0084884	0.0108889	0.0135586	0.0165145	0.0197734	0.0233495	0.0272417	0.0314436	0.0359486	0.0407331	0.0457365	0.0508932	0.056136	0.0613671	0.0664601	0.0712873	0.0757194	0.0796165	0.0828343	0.0852286	0.0866884	0.0871849	0.0867024	0.0852278	0.0828174	0.0796013	0.0757136	0.0712885	0.0664606	0.0613652	0.0561375
33	-0.00710717	-0.00684812	-0.0065506	-0.00620782	-0.00581297	-0.00535926	-0.0048399	-0.00424809	-0.00357686	-0.00281711	-0.0019582	-0.000989444	0.000100321	0.00132461	0.00269762	0.00423356	0.00594731	0.00785502	0.00997298	0.0123173	0.0149014	0.0177365	0.0208336	0.024201	0.0278322	0.0317152	0.0358381	0.0401753	0.0446722	0.0492702	0.0539093	0.0585017	0.0629335	0.0670899	0.0708574	0.0741305	0.0768074	0.0787861	0.0799883	0.0803954	0.0799978	0.0787879	0.0768039	0.0741335	0.0708665	0.0670955	0.0629318	0.0584955	0.0539069
34	-0.0062383	-0.00594273	-0.00560725	-0.00522544	-0.00479085	-0.00429707	-0.00373765	-0.00310617	-0.00239607	-0.00159897	-0.000705243	0.000294779	0.00141112	0.00265546	0.00403999	0.0055769	0.00727853	0.00915754	0.0112266	0.0134983	0.0159817	0.0186833	0.0216096	0.0247644	0.0281372	0.0317127	0.0354755	0.0393999	0.0434376	0.0475376	0.0516474	0.0556884	0.0595573	0.0631499	0.0663656	0.0691259	0.0713612	0.0730019	0.0739952	0.0743299	0.0740013	0.073006	0.0713685	0.0691434	0.066387	0.0631594	0.0595539	0.0556786	0.0516416
35	-0.00540874	-0.00508093	-0.00471222	-0.00429661	-0.00382807	-0.00330058	-0.00270814	-0.00204472	-0.00130419	-0.000478968	0.000439585	0.00146012	0.00259151	0.00384375	0.00522713	0.00675196	0.00842832	0.0102659	0.0122743	0.0144629	0.0168376	0.019401	0.0221559	0.0251027	0.0282285	0.0315163	0.0349489	0.0385009	0.0421292	0.0457883	0.0494317	0.0529911	0.0563779	0.0595027	0.0622799	0.064648	0.0665552	0.0679498	0.0687924	0.0690757	0.0687968	0.0679539	0.0665646	0.0646674	0.0623018	0.0595119	0.0563745	0.0529817	0.0494258
36	-0.00462044	-0.00426463	-0.0038674	-0.00342316	-0.00292633	-0.00237134	-0.00175261	-0.00106456	-0.000301529	0.000543326	0.00147767	0.00250918	0.00364568	0.00489563	0.00626765	0.00777038	0.00941198	0.0111998	0.013141	0.0152425	0.0175075	0.0199358	0.0225271	0.0252791	0.028178	0.0312063	0.0343463	0.0375727	0.0408437	0.0441155	0.0473437	0.0504738	0.0534419	0.0561836	0.0586357	0.0607421	0.062449	0.0637032	0.0644635	0.0647202	0.0644681	0.0637031	0.0624456	0.0607414	0.0586382	0.0561846	0.0534409	0.0504722	0.0473439
Y-component of velocity field (v_y) for H10 2-Stokeslet Brinkman flow
Y↓ & X→	-33	-32	-31	-30	-29	-28	-27	-26	-25	-24	-23	-22	-21	-20	-19	-18	-17	-16	-15	-14	-13	-12	-11	-10	-9	-8	-7	-6	-5	-4	-3	-2	-1	0	1	2	3	4	5	6	7	8	9	10	11	12	13	14	15
-37	-0.0215204	-0.0222599	-0.023024	-0.0238111	-0.0246196	-0.0254477	-0.0262939	-0.0271564	-0.0280334	-0.0289215	-0.029816	-0.0307123	-0.031605	-0.0324859	-0.0333459	-0.034176	-0.0349649	-0.0356973	-0.0363575	-0.0369296	-0.0373936	-0.0377263	-0.0379042	-0.0379037	-0.0376983	-0.0372608	-0.0365637	-0.0355824	-0.0342972	-0.0326892	-0.0307404	-0.0284461	-0.0258148	-0.0228552	-0.01958	-0.0160263	-0.012241	-0.00827096	-0.00416842	8.81577e-07	0.00416915	0.00826886	0.0122395	0.0160282	0.0195825	0.0228527	0.0258129	0.0284478	0.0307422
-36	-0.0218659	-0.022647	-0.0234566	-0.0242935	-0.0251563	-0.0260437	-0.0269546	-0.0278876	-0.0288413	-0.0298126	-0.0307972	-0.0317907	-0.0327882	-0.0337815	-0.0347614	-0.0357188	-0.0366421	-0.0375152	-0.0383215	-0.039044	-0.0396605	-0.0401446	-0.0404697	-0.0406087	-0.0405312	-0.0402056	-0.0396004	-0.0386845	-0.0374272	-0.0357982	-0.0337685	-0.0313357	-0.0285227	-0.025353	-0.021849	-0.0180235	-0.0138855	-0.00944434	-0.00474469	7.92164e-05	0.0048793	0.00950986	0.013887	0.0179929	0.0218131	0.0253315	0.0285208	0.0313482	0.033781
-35	-0.0221853	-0.0230082	-0.0238636	-0.0247507	-0.0256687	-0.0266169	-0.0275945	-0.0286007	-0.0296345	-0.0306933	-0.0317734	-0.032871	-0.0339814	-0.0350968	-0.0362081	-0.0373066	-0.0383803	-0.0394123	-0.0403849	-0.0412804	-0.042074	-0.0427362	-0.0432371	-0.0435457	-0.0436255	-0.0434382	-0.0429455	-0.0421088	-0.0408898	-0.03925	-0.0371525	-0.034589	-0.0315781	-0.0281396	-0.0242933	-0.0200602	-0.0154619	-0.0105201	-0.00529208	7.45523e-05	0.00541839	0.0105803	0.0154625	0.0200324	0.0242609	0.0281186	0.0315755	0.0346011	0.037165
-34	-0.0224745	-0.0233388	-0.0242397	-0.0251771	-0.0261507	-0.0271604	-0.0282059	-0.029287	-0.0304034	-0.0315531	-0.032733	-0.0339401	-0.0351704	-0.0364165	-0.0376699	-0.038922	-0.0401613	-0.0413699	-0.0425296	-0.0436215	-0.0446189	-0.0454889	-0.0461982	-0.046712	-0.0469861	-0.0469734	-0.0466266	-0.045899	-0.0447446	-0.0431174	-0.0409729	-0.0382906	-0.0350732	-0.031324	-0.0270523	-0.0223063	-0.0171494	-0.0116453	-0.00587708	2.28204e-05	0.00591436	0.0116587	0.0171467	0.0223015	0.0270476	0.0313145	0.0350692	0.038296	0.0409793
-33	-0.0227294	-0.0236343	-0.02458	-0.0255671	-0.0265959	-0.027667	-0.0287808	-0.0299377	-0.0311382	-0.0323811	-0.0336642	-0.0349852	-0.0363411	-0.0377253	-0.0391302	-0.0405478	-0.041967	-0.0433698	-0.0447373	-0.0460502	-0.04728	-0.0483904	-0.0493451	-0.050105	-0.0506177	-0.0508256	-0.0506717	-0.0500989	-0.0490514	-0.0474735	-0.0453104	-0.0425256	-0.0391	-0.0350151	-0.0302654	-0.0249314	-0.0191272	-0.0129672	-0.00656617	-4.00482e-05	0.00649515	0.0129231	0.0191201	0.0249546	0.0302947	0.0350196	0.0390942	0.0425226	0.0453095
-32	-0.0229459	-0.0238902	-0.0248794	-0.025915	-0.026998	-0.0281297	-0.0293114	-0.0305443	-0.0318294	-0.0331667	-0.034555	-0.0359932	-0.0374794	-0.0390081	-0.0405727	-0.0421667	-0.0437795	-0.0453933	-0.0469897	-0.0485493	-0.050042	-0.0514285	-0.0526695	-0.0537223	-0.0545251	-0.0550098	-0.0551084	-0.054752	-0.0538698	-0.0523911	-0.0502455	-0.0473787	-0.0437505	-0.0393217	-0.034072	-0.0281051	-0.0215743	-0.0146328	-0.00742585	-7.81225e-05	0.0072887	0.014552	0.0215633	0.0281464	0.0341238	0.0393344	0.0437425	0.0473704	0.0502407
-31	-0.02312	-0.0241019	-0.0251328	-0.0262151	-0.0273506	-0.0285415	-0.0297899	-0.0310978	-0.0324672	-0.0338991	-0.0353937	-0.0369512	-0.0385712	-0.0402495	-0.0419812	-0.0437612	-0.0455805	-0.0474223	-0.0492688	-0.0511016	-0.0528895	-0.0545908	-0.0561635	-0.0575611	-0.0587131	-0.0595406	-0.0599647	-0.0599021	-0.0592597	-0.0579431	-0.055859	-0.0529347	-0.0491169	-0.0443529	-0.0386113	-0.0319972	-0.02467	-0.0167894	-0.00852258	-5.54714e-05	0.00842294	0.0167237	0.0246569	0.0320315	0.0386566	0.0443594	0.0491065	0.0529291	0.0558585
-30	-0.0232477	-0.0242649	-0.0253352	-0.0264617	-0.0276474	-0.0288953	-0.0302084	-0.0315896	-0.0330419	-0.0345676	-0.0361685	-0.0378463	-0.0396022	-0.0414341	-0.0433391	-0.0453141	-0.047352	-0.0494379	-0.051556	-0.0536896	-0.0558071	-0.0578648	-0.0598185	-0.0616185	-0.0631862	-0.0644323	-0.065268	-0.0655925	-0.0652803	-0.0642025	-0.0622319	-0.0592797	-0.0552926	-0.0502186	-0.0440223	-0.0367749	-0.0285897	-0.0195806	-0.00992152	6.21223e-05	0.0100216	0.0196115	0.0285775	0.0367627	0.0440149	0.0501963	0.0552798	0.0592891	0.0622484
-29	-0.0233249	-0.0243747	-0.0254815	-0.0266493	-0.0278821	-0.0291839	-0.0305586	-0.0320103	-0.0335429	-0.0351603	-0.0368658	-0.0386633	-0.0405557	-0.0425432	-0.0446256	-0.0468023	-0.0490689	-0.0514134	-0.053823	-0.0562838	-0.0587649	-0.0612216	-0.0636087	-0.0658745	-0.0679324	-0.0696837	-0.0710294	-0.0718494	-0.0719774	-0.071241	-0.0694707	-0.0665563	-0.0624434	-0.0570796	-0.0504219	-0.0424899	-0.0333274	-0.0229792	-0.0116234	0.000225352	0.0120004	0.0231437	0.033316	0.042413	0.0503418	0.0570184	0.0624276	0.066586	0.0695102
-28	-0.0233478	-0.0244269	-0.0255666	-0.0267719	-0.0280478	-0.0293994	-0.0308317	-0.0323497	-0.0339585	-0.0356635	-0.0374701	-0.0393841	-0.0414106	-0.0435528	-0.0458134	-0.048195	-0.0506967	-0.0533103	-0.0560272	-0.0588373	-0.0617124	-0.064609	-0.0674836	-0.0702844	-0.0729166	-0.0752706	-0.0772366	-0.0786743	-0.0793769	-0.0791289	-0.0777179	-0.0749884	-0.0708388	-0.0651695	-0.0578956	-0.0490285	-0.0386178	-0.0267137	-0.0135366	0.000265476	0.0139784	0.0268983	0.0385969	0.0489405	0.0578098	0.0651001	0.0708175	0.0750195	0.0777637
-27	-0.0233125	-0.0244171	-0.0255855	-0.0268237	-0.028138	-0.0295343	-0.0310188	-0.0325975	-0.0342768	-0.0360635	-0.0379654	-0.0399904	-0.0421458	-0.0444384	-0.0468746	-0.0494607	-0.0522	-0.0550893	-0.0581249	-0.061302	-0.0645974	-0.0679731	-0.0713907	-0.0748016	-0.0781015	-0.0811673	-0.0838756	-0.0860668	-0.087503	-0.0879363	-0.0871188	-0.0848059	-0.0807559	-0.0747274	-0.0665262	-0.0562644	-0.0441756	-0.0304942	-0.0155627	4.58273e-06	0.0155513	0.0304266	0.0441246	0.0562948	0.0665941	0.0747238	0.0807248	0.0847943	0.0871305
-26	-0.0232156	-0.0243412	-0.0255334	-0.0267993	-0.0281462	-0.0295811	-0.0311112	-0.0327438	-0.034486	-0.0363468	-0.038336	-0.0404637	-0.0427399	-0.0451753	-0.0477805	-0.0505664	-0.053541	-0.0567073	-0.0600678	-0.063624	-0.067361	-0.0712506	-0.0752643	-0.0793605	-0.0834255	-0.087321	-0.0909085	-0.0940117	-0.0963724	-0.0977218	-0.0977856	-0.0961803	-0.0924201	-0.0860154	-0.0765851	-0.0644511	-0.0502148	-0.0344781	-0.0177908	-0.000570849	0.0167842	0.0338701	0.0501086	0.064735	0.0769757	0.0861573	0.092375	0.0960785	0.0977195
-25	-0.023054	-0.0241957	-0.0254064	-0.026694	-0.028067	-0.0295334	-0.0311015	-0.0327794	-0.0345756	-0.0365005	-0.0385665	-0.0407858	-0.0431712	-0.0457374	-0.0484998	-0.051474	-0.0546735	-0.0581092	-0.0617914	-0.0657296	-0.0699195	-0.0743458	-0.0789928	-0.0838294	-0.0887409	-0.0935839	-0.0982146	-0.102442	-0.105974	-0.108503	-0.109714	-0.109079	-0.105876	-0.0993752	-0.0890001	-0.0751682	-0.0586924	-0.0403866	-0.0209662	-0.000900416	0.0193799	0.0394326	0.0585227	0.0756018	0.089606	0.0996162	0.105819	0.108913	0.109596
-24	-0.0228252	-0.0239776	-0.0252006	-0.0265035	-0.0278953	-0.0293853	-0.0309824	-0.0326958	-0.0345348	-0.0365119	-0.0386415	-0.0409383	-0.0434175	-0.0460981	-0.0490003	-0.052144	-0.0555494	-0.059237	-0.0632275	-0.0675405	-0.072184	-0.077156	-0.0824542	-0.0880617	-0.0938811	-0.0997873	-0.105655	-0.11128	-0.116291	-0.12029	-0.122873	-0.123424	-0.121129	-0.115166	-0.104842	-0.0902845	-0.0719459	-0.0502815	-0.025977	-0.000298547	0.025398	0.049767	0.0717254	0.0904714	0.105217	0.115305	0.121071	0.123309	0.122816
-23	-0.0225267	-0.0236836	-0.0249125	-0.0262235	-0.0276262	-0.0291307	-0.0307467	-0.0324843	-0.0343536	-0.0363686	-0.0385461	-0.0409031	-0.0434572	-0.0462315	-0.0492502	-0.0525376	-0.056121	-0.0600333	-0.0643078	-0.0689773	-0.0740623	-0.0795736	-0.0855217	-0.0919069	-0.0986752	-0.105754	-0.11307	-0.120408	-0.127253	-0.133046	-0.137228	-0.139183	-0.138247	-0.13375	-0.125012	-0.111286	-0.0917919	-0.0657561	-0.033528	0.00171663	0.0363651	0.0668751	0.0915403	0.110621	0.124475	0.133483	0.138208	0.139297	0.137399
-22	-0.0221569	-0.0233122	-0.0245402	-0.0258515	-0.0272565	-0.0287659	-0.03039	-0.0321394	-0.0340249	-0.0360621	-0.0382697	-0.0406665	-0.0432727	-0.0461148	-0.0492211	-0.0526203	-0.0563465	-0.0604453	-0.0649634	-0.0699468	-0.0754319	-0.081447	-0.0880204	-0.0951757	-0.102913	-0.111223	-0.120098	-0.129331	-0.138294	-0.146301	-0.15267	-0.156745	-0.157902	-0.155514	-0.148809	-0.136059	-0.115157	-0.0840009	-0.0426021	0.00371289	0.0487961	0.0866352	0.114765	0.13452	0.147421	0.154917	0.157914	0.157069	0.153035
-21	-0.0217152	-0.0228624	-0.0240824	-0.0253861	-0.0267844	-0.0282883	-0.0299088	-0.0316568	-0.0335437	-0.035586	-0.0378037	-0.0402171	-0.0428481	-0.045727	-0.0488866	-0.0523596	-0.0561867	-0.0604228	-0.0651245	-0.0703484	-0.0761534	-0.0826001	-0.0897493	-0.0976577	-0.106362	-0.11589	-0.12627	-0.137349	-0.148577	-0.159351	-0.169055	-0.176729	-0.181095	-0.180862	-0.174652	-0.160519	-0.136289	-0.0997935	-0.0512384	0.00320927	0.0564598	0.101571	0.135444	0.159098	0.173754	0.180654	0.181208	0.176903	0.169227
-20	-0.0212008	-0.0223335	-0.0235381	-0.0248258	-0.0262078	-0.0276955	-0.0292999	-0.0310325	-0.0329049	-0.0349339	-0.0371399	-0.0395437	-0.0421681	-0.0450477	-0.0482203	-0.0517238	-0.055603	-0.0599159	-0.0647219	-0.0700824	-0.0760891	-0.0828584	-0.0905076	-0.0991402	-0.108784	-0.119442	-0.131115	-0.143765	-0.157267	-0.171484	-0.186202	-0.199679	-0.208742	-0.210161	-0.201062	-0.180841	-0.149802	-0.108251	-0.0576169	-0.00214335	0.053491	0.104656	0.147988	0.181484	0.203203	0.211677	0.209025	0.199025	0.185462
-19	-0.020614	-0.0217255	-0.0229073	-0.0241706	-0.0255268	-0.0269872	-0.0285631	-0.0302658	-0.0321069	-0.0341032	-0.0362746	-0.0386414	-0.0412267	-0.0440688	-0.0472099	-0.0506926	-0.0545641	-0.058881	-0.0637006	-0.0690844	-0.0751606	-0.0821111	-0.0901198	-0.0993422	-0.109781	-0.121386	-0.134108	-0.148074	-0.16379	-0.181813	-0.202549	-0.223312	-0.238534	-0.242534	-0.23053	-0.203539	-0.164883	-0.117893	-0.0654688	-0.00943721	0.0485413	0.10673	0.161409	0.206729	0.23674	0.246538	0.239232	0.221627	0.200547
-18	-0.0199563	-0.0210397	-0.0221914	-0.0234225	-0.0247439	-0.0261666	-0.0277016	-0.0293599	-0.0311528	-0.0330964	-0.0352101	-0.0375137	-0.0400299	-0.0427975	-0.04586	-0.0492609	-0.0530488	-0.057283	-0.0620233	-0.0673349	-0.0733653	-0.0803289	-0.088442	-0.0978962	-0.108746	-0.120998	-0.134663	-0.150013	-0.167898	-0.189239	-0.214786	-0.241757	-0.26407	-0.275519	-0.270588	-0.248237	-0.209206	-0.154242	-0.0855664	-0.00909695	0.0686756	0.141296	0.203231	0.249937	0.276916	0.28071	0.265797	0.240318	0.212433
-17	-0.0192295	-0.0202774	-0.021392	-0.0225834	-0.0238617	-0.0252369	-0.0267192	-0.0283186	-0.0300456	-0.031916	-0.0339491	-0.0361645	-0.0385843	-0.0412425	-0.0441766	-0.0474244	-0.0510364	-0.0550872	-0.059654	-0.064817	-0.0707053	-0.0774873	-0.0853327	-0.0944288	-0.105059	-0.11754	-0.132188	-0.149338	-0.169363	-0.192643	-0.219491	-0.248912	-0.278687	-0.306552	-0.329085	-0.335395	-0.311615	-0.243901	-0.129129	0.00887775	0.142131	0.243296	0.302161	0.326847	0.326377	0.309462	0.282439	0.250545	0.219012
-16	-0.0184354	-0.0194409	-0.0205116	-0.0216563	-0.0228836	-0.024202	-0.0256203	-0.0271469	-0.028791	-0.0305682	-0.0324984	-0.034602	-0.0368996	-0.0394144	-0.0421704	-0.0451916	-0.0485305	-0.0522923	-0.056588	-0.061526	-0.0671715	-0.0735547	-0.0807046	-0.088755	-0.0984137	-0.110585	-0.126169	-0.145442	-0.16732	-0.190542	-0.214046	-0.240779	-0.27743	-0.330833	-0.402985	-0.464593	-0.473916	-0.389252	-0.196929	0.046271	0.272675	0.416445	0.459678	0.435813	0.380807	0.327447	0.284292	0.248712	0.218022
-15	-0.0175777	-0.0185349	-0.0195557	-0.020647	-0.0218156	-0.0230685	-0.0244125	-0.0258545	-0.027402	-0.0290698	-0.0308779	-0.0328465	-0.0349941	-0.0373313	-0.0398667	-0.0426089	-0.0456092	-0.0489985	-0.0529161	-0.0574931	-0.0627209	-0.0684773	-0.074637	-0.0812628	-0.0894527	-0.100658	-0.116325	-0.136619	-0.158943	-0.180334	-0.198294	-0.219775	-0.260552	-0.336739	-0.456033	-0.57171	-0.615392	-0.518759	-0.257852	0.0797941	0.389404	0.569152	0.594193	0.522139	0.414645	0.327429	0.270811	0.234156	0.20672
-14	-0.0166599	-0.0175649	-0.0185304	-0.0195617	-0.0206641	-0.0218431	-0.0231039	-0.0244519	-0.0258929	-0.0274397	-0.0291098	-0.0309208	-0.0328877	-0.0350125	-0.0372936	-0.0397299	-0.0423647	-0.0453251	-0.0487473	-0.0527567	-0.0573039	-0.0621971	-0.0672405	-0.0724494	-0.0790006	-0.0884677	-0.102417	-0.120957	-0.14104	-0.159202	-0.17254	-0.189535	-0.229299	-0.311347	-0.445658	-0.580512	-0.639641	-0.54684	-0.274724	0.0813927	0.407221	0.59171	0.608322	0.521041	0.398289	0.30181	0.242273	0.20677	0.182272
-13	-0.0156859	-0.0165362	-0.0174417	-0.0184068	-0.0194358	-0.0205331	-0.021703	-0.0229498	-0.0242783	-0.0256968	-0.0272164	-0.0288485	-0.0306026	-0.0324808	-0.0344831	-0.0366095	-0.0388861	-0.041387	-0.0441917	-0.047374	-0.0509121	-0.0547069	-0.0586567	-0.0627861	-0.067813	-0.0746918	-0.0843731	-0.0970319	-0.111163	-0.125042	-0.137277	-0.153302	-0.184917	-0.244169	-0.336827	-0.428083	-0.46698	-0.402603	-0.216465	0.0284237	0.256451	0.394084	0.422061	0.379256	0.30739	0.244378	0.199016	0.166659	0.142592
-12	-0.0146602	-0.0154532	-0.0162949	-0.0171888	-0.0181388	-0.0191486	-0.0202218	-0.0213622	-0.0225734	-0.0238584	-0.0252194	-0.0266586	-0.0281792	-0.0297891	-0.0314974	-0.033313	-0.0352381	-0.0372614	-0.0393703	-0.0415559	-0.0438689	-0.0464083	-0.0492748	-0.0525374	-0.0560932	-0.0597801	-0.0634385	-0.0673762	-0.0729129	-0.0815005	-0.094488	-0.111119	-0.128671	-0.144346	-0.155362	-0.159037	-0.152725	-0.133787	-0.101209	-0.0580633	-0.00805485	0.0450451	0.0957085	0.136527	0.159998	0.16008	0.141875	0.115635	0.0916321
-11	-0.0135876	-0.0143204	-0.015095	-0.0159146	-0.0167822	-0.017701	-0.018674	-0.0197042	-0.0207943	-0.0219418	-0.0231401	-0.0243827	-0.0256666	-0.0270043	-0.0284132	-0.0299102	-0.0314733	-0.0330072	-0.0344088	-0.0355875	-0.0366578	-0.0379012	-0.0396039	-0.0418673	-0.0437771	-0.0440717	-0.0414979	-0.036437	-0.032811	-0.0350047	-0.0468741	-0.061485	-0.0618295	-0.0305139	0.0434875	0.130015	0.182524	0.154503	0.0291148	-0.135889	-0.271227	-0.309834	-0.242588	-0.122427	-0.00533028	0.0592619	0.071928	0.0563338	0.0362633
-10	-0.0124731	-0.0131418	-0.013847	-0.0145908	-0.0153751	-0.0162019	-0.0170732	-0.0179911	-0.0189569	-0.0199639	-0.021	-0.0220526	-0.0231134	-0.0241929	-0.0253069	-0.0264711	-0.0276452	-0.0286847	-0.0294336	-0.0297517	-0.0297572	-0.0297789	-0.0301512	-0.030949	-0.0308192	-0.0279209	-0.0204238	-0.00860237	0.00270987	0.00808301	0.00280936	-0.00309365	0.0141394	0.0788002	0.205298	0.34412	0.420326	0.359027	0.133198	-0.163905	-0.420425	-0.527923	-0.467141	-0.314349	-0.150499	-0.0476198	-0.00951334	-0.00848706	-0.0166861
-9	-0.0113213	-0.0119227	-0.0125569	-0.0132244	-0.0139256	-0.014661	-0.0154311	-0.0162363	-0.0170765	-0.0179431	-0.0188214	-0.0196968	-0.0205572	-0.0214026	-0.0222369	-0.0230634	-0.0238317	-0.0243916	-0.0245815	-0.0242525	-0.0234577	-0.0224146	-0.0213454	-0.0202344	-0.0177581	-0.0121459	-0.00163621	0.0137845	0.0303423	0.0437683	0.0504223	0.059491	0.0921365	0.16998	0.304903	0.445815	0.516566	0.441067	0.192129	-0.134538	-0.424221	-0.565594	-0.535767	-0.40657	-0.254482	-0.147981	-0.0943903	-0.0728073	-0.0621804
-8	-0.0101371	-0.0106694	-0.0112316	-0.0118226	-0.0124412	-0.0130864	-0.0137568	-0.0144515	-0.0151686	-0.0158988	-0.0166276	-0.0173403	-0.0180223	-0.0186604	-0.0192414	-0.019752	-0.0201378	-0.0202675	-0.0200015	-0.0192056	-0.0178384	-0.0159335	-0.0135268	-0.0104898	-0.00579025	0.00191269	0.0139549	0.0306827	0.0502982	0.0707233	0.0902655	0.115094	0.15872	0.234935	0.350085	0.462368	0.510825	0.434549	0.212213	-0.0780247	-0.342627	-0.490697	-0.500302	-0.423376	-0.315474	-0.226837	-0.167049	-0.12693	-0.0972025
-7	-0.00892519	-0.00938803	-0.009878	-0.0103926	-0.0109294	-0.0114858	-0.0120595	-0.0126479	-0.013248	-0.0138506	-0.0144419	-0.0150079	-0.0155328	-0.0159918	-0.0163574	-0.0166019	-0.01667	-0.0164546	-0.0158429	-0.0147217	-0.0129672	-0.0104477	-0.00703102	-0.00249743	0.00385368	0.0128874	0.0254673	0.0421744	0.0629771	0.0877639	0.11656	0.152197	0.200121	0.265882	0.350383	0.424494	0.447134	0.377264	0.201104	-0.0265985	-0.240503	-0.376996	-0.417581	-0.392084	-0.332704	-0.269091	-0.211442	-0.160971	-0.118845
-6	-0.00769009	-0.00808441	-0.00850245	-0.00894098	-0.00939677	-0.00986659	-0.0103472	-0.0108354	-0.0113275	-0.0118143	-0.0122827	-0.0127193	-0.0131078	-0.0134177	-0.013614	-0.0136618	-0.0135063	-0.0130559	-0.0122149	-0.0108837	-0.00889818	-0.006042	-0.00209713	0.00319561	0.010322	0.0198454	0.0323293	0.0484016	0.0688289	0.0943961	0.125875	0.163788	0.208417	0.260041	0.316395	0.358792	0.362011	0.300859	0.167551	-0.00193488	-0.164858	-0.279524	-0.33161	-0.33611	-0.309452	-0.267217	-0.21847	-0.169269	-0.125656
-5	-0.00643573	-0.00676252	-0.00710917	-0.00747223	-0.00784825	-0.00823378	-0.00862537	-0.00901957	-0.00941254	-0.00979537	-0.0101556	-0.0104806	-0.0107544	-0.0109458	-0.0110187	-0.010937	-0.0106485	-0.0100709	-0.00911829	-0.00770029	-0.00564789	-0.00272829	0.00129314	0.00667178	0.0137769	0.0230167	0.0348001	0.0496664	0.0684374	0.0919717	0.121052	0.154908	0.191322	0.228019	0.26155	0.280863	0.271882	0.220552	0.12324	0.00252089	-0.114981	-0.203246	-0.25212	-0.268431	-0.259843	-0.233933	-0.197604	-0.157453	-0.120069
-4	-0.00516592	-0.0054261	-0.00570207	-0.00599058	-0.00628839	-0.00659227	-0.00689897	-0.00720525	-0.00750752	-0.00779762	-0.00806415	-0.00829565	-0.00847766	-0.00858173	-0.00857533	-0.00842576	-0.00808594	-0.00748177	-0.00653621	-0.00516796	-0.00322683	-0.000506578	0.00320068	0.00811758	0.014548	0.0228235	0.0332761	0.0462974	0.0624086	0.0821479	0.105968	0.132594	0.159135	0.182637	0.199745	0.204487	0.189853	0.148844	0.08034	-0.00200912	-0.0822682	-0.144848	-0.183168	-0.200301	-0.199792	-0.185303	-0.16139	-0.133021	-0.105165
-3	-0.0038844	-0.00407879	-0.00428491	-0.00450004	-0.00472149	-0.00494656	-0.00517253	-0.00539672	-0.00561612	-0.00582394	-0.00601067	-0.00616672	-0.00628018	-0.00632801	-0.00628394	-0.00612156	-0.00580212	-0.00526366	-0.00444168	-0.00326855	-0.00162544	0.000648091	0.00371371	0.00774606	0.0129911	0.0197193	0.028201	0.0386901	0.0514053	0.0665606	0.0843024	0.103397	0.12132	0.1355	0.14329	0.141561	0.126994	0.096275	0.0493875	-0.00540552	-0.0585607	-0.100736	-0.12786	-0.141503	-0.143513	-0.135844	-0.121259	-0.102893	-0.0838819
-2	-0.0025943	-0.00272355	-0.00286054	-0.00300333	-0.00315001	-0.00329864	-0.00344731	-0.00359408	-0.00373684	-0.00387067	-0.00398874	-0.00408416	-0.00414841	-0.00416545	-0.00411701	-0.00398476	-0.00374108	-0.00334105	-0.00273782	-0.00188259	-0.000694303	0.000934337	0.00311137	0.00595558	0.00964472	0.0143767	0.0203492	0.0277077	0.0364851	0.0466992	0.0583264	0.0704935	0.0815344	0.0897525	0.0934429	0.0908478	0.080188	0.0596893	0.0295246	-0.0052391	-0.0387781	-0.0653934	-0.082639	-0.0915538	-0.0933472	-0.0892712	-0.0809033	-0.0699706	-0.0582011
-1	-0.00129852	-0.00136304	-0.00143139	-0.00150258	-0.0015756	-0.00164946	-0.00172316	-0.00179569	-0.00186594	-0.00193135	-0.00198834	-0.0020333	-0.00206181	-0.00206562	-0.00203535	-0.00196159	-0.00183	-0.001617	-0.00129802	-0.000847512	-0.000224466	0.000624735	0.00175407	0.00322339	0.00512475	0.00756121	0.0106357	0.0144127	0.018874	0.0239904	0.0297145	0.0356267	0.04096	0.044934	0.0467522	0.045514	0.040277	0.0301016	0.0150411	-0.00235547	-0.0191528	-0.0324789	-0.041113	-0.0456025	-0.0465817	-0.0446992	-0.0407156	-0.0354428	-0.029693
0	2.70486e-08	1.03772e-07	1.19109e-07	9.81061e-08	6.58085e-08	4.72619e-08	6.75119e-08	1.51604e-07	3.18924e-07	5.13926e-07	6.27988e-07	5.5137e-07	2.53757e-07	7.69812e-08	4.71777e-07	1.88256e-06	4.0794e-06	5.569e-06	4.71921e-06	1.43894e-07	-5.53606e-06	-6.43979e-06	3.40821e-06	2.64324e-05	4.5539e-05	3.69638e-05	-2.2891e-05	-0.000125517	-0.00019285	-0.00013773	0.00011873	0.000486708	0.000718868	0.000561844	-0.000155354	-0.00107092	-0.00161109	-0.00120247	0.000356035	0.00232993	0.00384004	0.00403715	0.00285431	0.00106242	-0.000526529	-0.00120277	-0.0010382	-0.00046554	8.06863e-05
1	0.00129853	0.00136321	0.00143157	0.00150268	0.00157558	0.00164935	0.00172302	0.00179566	0.00186619	0.00193192	0.00198898	0.00203349	0.00206092	0.00206385	0.00203397	0.00196292	0.00183577	0.00162529	0.00130286	0.000839548	0.000200868	-0.000652189	-0.00175876	-0.00317231	-0.00502502	-0.00747601	-0.0106838	-0.0146904	-0.0192857	-0.0242268	-0.0292753	-0.0342932	-0.0392358	-0.0440619	-0.0484654	-0.0504259	-0.0472412	-0.0362123	-0.0167284	0.00657401	0.0282469	0.0429866	0.0492532	0.0495379	0.0465302	0.0426873	0.038695	0.0344216	0.0297306
2	0.00259423	0.00272361	0.00286058	0.00300326	0.00314978	0.00329825	0.00344681	0.00359357	0.00373644	0.00387038	0.00398826	0.00408294	0.0041458	0.00416151	0.00411274	0.00398209	0.00374138	0.0033423	0.00273436	0.00186561	0.000661112	-0.000972789	-0.0031303	-0.0059238	-0.00956549	-0.0143017	-0.0203782	-0.0279183	-0.0367803	-0.0467877	-0.0577481	-0.0691368	-0.0801196	-0.0898502	-0.0971758	-0.0989584	-0.0912707	-0.0701916	-0.035027	0.00680605	0.0466364	0.076003	0.0919279	0.0973067	0.0953226	0.0889838	0.0799582	0.069295	0.0580398
3	0.00388438	0.00407865	0.00428476	0.00449995	0.00472148	0.0049466	0.00517258	0.00539667	0.00561584	0.0058234	0.00601004	0.00616639	0.00628059	0.006329	0.00628456	0.00612007	0.00579723	0.00525682	0.00443735	0.00327375	0.0016425	-0.000627424	-0.00370844	-0.00777957	-0.0130561	-0.0197659	-0.0281367	-0.0384408	-0.0510454	-0.0663307	-0.0845962	-0.104504	-0.123186	-0.137717	-0.145194	-0.142877	-0.128084	-0.0981446	-0.0532175	-0.000581204	0.0513857	0.0944605	0.124496	0.141711	0.146538	0.139709	0.124251	0.10425	0.0837975
4	0.00516602	0.00542562	0.0057016	0.00599048	0.00628883	0.0065932	0.00690014	0.0072062	0.00750764	0.00779687	0.00806357	0.00829736	0.00848414	0.00859246	0.00858578	0.00842747	0.00807274	0.00746145	0.00653177	0.00521535	0.00333707	0.000635001	-0.0031553	-0.00828149	-0.0148989	-0.0231314	-0.0331047	-0.0453004	-0.0609712	-0.0814708	-0.107977	-0.138095	-0.166091	-0.186104	-0.19285	-0.184781	-0.161835	-0.123955	-0.0726655	-0.0134593	0.0475582	0.104312	0.151523	0.184766	0.199659	0.192878	0.169212	0.137192	0.105368
5	0.00643572	0.00676172	0.00710832	0.00747179	0.0078484	0.00823443	0.00862616	0.00901985	0.00941147	0.0097928	0.0101527	0.01048	0.0107592	0.010955	0.0110261	0.0109313	0.0106211	0.010031	0.00909481	0.00773832	0.00576007	0.0028549	-0.00128535	-0.00694865	-0.0143119	-0.0235142	-0.034697	-0.0485047	-0.0666704	-0.0910696	-0.123376	-0.161136	-0.198046	-0.227654	-0.243807	-0.242279	-0.21961	-0.172355	-0.101048	-0.0162309	0.070008	0.145742	0.203278	0.239456	0.25134	0.237102	0.203418	0.160885	0.120119
6	0.00768999	0.00808411	0.00850209	0.00894066	0.00939651	0.00986635	0.0103469	0.0108348	0.0113264	0.0118126	0.0122806	0.0127172	0.0131063	0.0134164	0.0136113	0.013655	0.0134932	0.0130379	0.0121975	0.0108758	0.00890143	0.00604248	0.00206506	-0.00329693	-0.0104869	-0.0200087	-0.0323673	-0.0481999	-0.0684314	-0.0940243	-0.125891	-0.163921	-0.207051	-0.254179	-0.302208	-0.335128	-0.331789	-0.271069	-0.146948	0.00863259	0.157861	0.263846	0.313719	0.320339	0.297828	0.259642	0.214146	0.167357	0.125275
7	0.00892523	0.00938954	0.00987962	0.0103935	0.0109292	0.0114848	0.0120582	0.0126476	0.0132503	0.0138557	0.0144475	0.0150094	0.0155247	0.0159758	0.0163449	0.0166139	0.0167221	0.0165299	0.0158888	0.0146551	0.0127651	0.0102196	0.00702137	0.00301064	-0.00286587	-0.0119668	-0.0256457	-0.0442776	-0.0661165	-0.0891395	-0.111674	-0.139185	-0.183806	-0.257922	-0.366929	-0.470996	-0.512299	-0.433064	-0.213313	0.0719413	0.332999	0.482676	0.499464	0.432206	0.333194	0.249771	0.191459	0.150319	0.118318
8	0.0101372	0.0106722	0.0112346	0.0118242	0.0124407	0.0130841	0.0137541	0.0144505	0.0151724	0.0159079	0.0166378	0.0173424	0.0180058	0.0186284	0.0192158	0.0197724	0.0202341	0.0204069	0.0200828	0.0190701	0.0174401	0.0154787	0.0134778	0.0114207	0.00759431	-0.000294359	-0.0145265	-0.035091	-0.0570115	-0.0746618	-0.0832263	-0.0944108	-0.135347	-0.233756	-0.404992	-0.584419	-0.675573	-0.582069	-0.269023	0.143869	0.513011	0.69901	0.672268	0.520785	0.338329	0.208941	0.142281	0.113681	0.0982921
9	0.0113213	0.0119253	0.0125596	0.0132256	0.0139248	0.0146584	0.0154279	0.0162346	0.0170792	0.0179505	0.0188294	0.0196965	0.0205383	0.0213681	0.0222073	0.0230763	0.0239152	0.0245134	0.0246438	0.0241015	0.0230472	0.0219385	0.021242	0.0210469	0.0193704	0.013521	0.000823082	-0.0184181	-0.0374383	-0.0486289	-0.045427	-0.042598	-0.0748199	-0.177533	-0.371503	-0.582574	-0.698829	-0.608431	-0.270211	0.179391	0.576474	0.762024	0.704661	0.509709	0.289198	0.143153	0.0798415	0.065169	0.0648238
10	0.012473	0.0131421	0.0138474	0.0145909	0.0153749	0.0162014	0.0170726	0.0179906	0.0189569	0.0199646	0.0210006	0.0220519	0.0231098	0.0241866	0.025301	0.0264707	0.027654	0.0286978	0.0294364	0.0297216	0.0296864	0.0296934	0.0301115	0.0310295	0.0309962	0.0280342	0.0201778	0.00773317	-0.00407151	-0.00936437	-0.00306448	0.00378272	-0.0149245	-0.0858643	-0.225022	-0.379222	-0.467772	-0.41004	-0.176134	0.136315	0.409956	0.530974	0.477885	0.328102	0.163888	0.0585502	0.0169432	0.0123225	0.0177799
11	0.0135877	0.0143177	0.0150922	0.0159133	0.016783	0.0177036	0.0186772	0.0197058	0.0207915	0.0219341	0.0231317	0.0243827	0.0256854	0.0270389	0.0284427	0.029896	0.0313865	0.0328806	0.0343423	0.0357377	0.0370714	0.0383788	0.0396961	0.0410167	0.0420968	0.0426118	0.0422389	0.0410184	0.0397765	0.0394424	0.040828	0.0423558	0.0402173	0.0305185	0.0107814	-0.0123151	-0.0284486	-0.027304	-0.00501785	0.0260575	0.0510626	0.055613	0.0377261	0.00870299	-0.0195037	-0.0363285	-0.0418096	-0.0408802	-0.0384985
12	0.0146603	0.0154488	0.0162902	0.0171866	0.0181401	0.0191529	0.0202271	0.0213647	0.0225684	0.023845	0.0252048	0.026658	0.0282106	0.0298472	0.0315467	0.0332882	0.0350904	0.0370464	0.0392575	0.0418114	0.0445721	0.0472222	0.0494387	0.051108	0.053266	0.0573415	0.0647544	0.0752425	0.0848979	0.0893365	0.084776	0.0797113	0.0941	0.148338	0.25441	0.369888	0.430695	0.372805	0.17254	-0.0923558	-0.32846	-0.445115	-0.423893	-0.323728	-0.20735	-0.13081	-0.0990952	-0.0936257	-0.0956971
13	0.0156859	0.0165319	0.0174372	0.0184045	0.0194368	0.0205368	0.0217075	0.0229518	0.024273	0.0256836	0.027202	0.0288469	0.0306301	0.0325327	0.0345262	0.036583	0.0387446	0.0411816	0.0440788	0.0475993	0.051548	0.0554388	0.0587771	0.0614168	0.0651274	0.0723329	0.0854433	0.104093	0.121906	0.131719	0.127354	0.122715	0.150454	0.243942	0.422615	0.615782	0.71689	0.61947	0.284358	-0.158447	-0.552786	-0.747126	-0.710609	-0.541637	-0.344949	-0.214161	-0.157818	-0.145199	-0.145382
14	0.0166598	0.0175628	0.0185282	0.0195605	0.0206644	0.0218446	0.0231058	0.0244525	0.0258901	0.0274331	0.0291025	0.0309191	0.0328991	0.0350347	0.0373111	0.0397143	0.0422947	0.0452236	0.0486858	0.0528477	0.057579	0.0625077	0.0672551	0.0717556	0.0776662	0.0872322	0.102687	0.123866	0.145413	0.161292	0.166316	0.172609	0.208457	0.302765	0.471642	0.648422	0.733509	0.627387	0.29403	-0.143003	-0.53548	-0.739494	-0.724176	-0.579718	-0.402254	-0.277941	-0.216683	-0.193184	-0.181965
15	0.0175777	0.0185351	0.019556	0.0206472	0.0218157	0.0230685	0.0244125	0.0258547	0.0274026	0.0290707	0.030879	0.0328472	0.0349939	0.0373304	0.0398663	0.0426114	0.0456165	0.0490085	0.0529231	0.0574879	0.0627006	0.0684533	0.0746353	0.0813151	0.0895479	0.100726	0.116236	0.136249	0.158301	0.179585	0.197721	0.219013	0.257877	0.329039	0.439399	0.545247	0.582736	0.488076	0.239141	-0.0814654	-0.374949	-0.545299	-0.569239	-0.501389	-0.400194	-0.318445	-0.265718	-0.231643	-0.205748
16	0.0184356	0.0194422	0.0205131	0.0216572	0.0228836	0.0242012	0.0256193	0.0271468	0.0287931	0.0305727	0.0325036	0.0346037	0.0368932	0.0394014	0.0421607	0.0452032	0.0485771	0.0523595	0.056631	0.0614739	0.0670049	0.0733678	0.0807076	0.0892088	0.0992747	0.111383	0.126012	0.143596	0.164473	0.188972	0.217416	0.250106	0.287317	0.329322	0.373912	0.402817	0.391376	0.314956	0.166438	-0.0172802	-0.192496	-0.3166	-0.375572	-0.386011	-0.366018	-0.332555	-0.293873	-0.254205	-0.21776
17	0.0192293	0.0202781	0.0213928	0.0225836	0.0238611	0.0252357	0.0267177	0.0283175	0.0300459	0.0319178	0.033951	0.0361634	0.0385767	0.0412293	0.0441647	0.0474266	0.0510621	0.0551254	0.0596715	0.0647617	0.0705618	0.0773226	0.0852972	0.0947098	0.105625	0.118052	0.132004	0.147943	0.167307	0.191662	0.222374	0.256738	0.288253	0.310269	0.316485	0.302855	0.266224	0.203453	0.115503	0.0136309	-0.0893087	-0.180639	-0.252262	-0.300981	-0.323844	-0.318994	-0.292985	-0.25625	-0.219241
18	0.0199563	0.0210398	0.0221915	0.0234225	0.0247437	0.0261663	0.0277012	0.0293595	0.0311527	0.0330965	0.0352102	0.037513	0.0400276	0.0427939	0.0458563	0.0492596	0.0530518	0.0572876	0.0620221	0.0673164	0.0733253	0.0802804	0.0884151	0.0979285	0.108828	0.121057	0.134558	0.14964	0.167391	0.189004	0.215477	0.243813	0.267288	0.279035	0.27306	0.249015	0.2088	0.154322	0.0882156	0.0149418	-0.0607556	-0.134104	-0.199564	-0.250778	-0.281349	-0.286174	-0.270059	-0.242383	-0.212547
19	0.0206142	0.0217255	0.0229073	0.0241708	0.0255273	0.0269879	0.028564	0.0302666	0.0321074	0.0341033	0.0362748	0.0386427	0.0412304	0.0440745	0.0472156	0.050694	0.0545583	0.0588714	0.0636982	0.0691062	0.0752112	0.0821682	0.0901333	0.0992498	0.109591	0.121204	0.13414	0.148483	0.164398	0.182062	0.201546	0.22084	0.235983	0.242942	0.237989	0.219373	0.186126	0.137293	0.0741046	0.00330114	-0.0675272	-0.130895	-0.182068	-0.219259	-0.240823	-0.245683	-0.237075	-0.220233	-0.200397
20	0.0212007	0.0223332	0.0235377	0.0248256	0.0262078	0.0276957	0.0293002	0.0310327	0.0329045	0.0349329	0.0371389	0.0395437	0.0421704	0.045052	0.0482242	0.0517227	0.0555938	0.0599025	0.0647165	0.0701037	0.076143	0.082922	0.0905285	0.0990531	0.108602	0.119287	0.131217	0.14431	0.158058	0.171901	0.18525	0.196979	0.205456	0.209032	0.205867	0.192894	0.166557	0.12331	0.0630987	-0.00534724	-0.0719404	-0.126813	-0.165818	-0.190939	-0.204461	-0.208641	-0.205546	-0.197155	-0.185445
21	0.021715	0.0228621	0.0240821	0.0253858	0.0267841	0.028288	0.0299085	0.0316563	0.0335429	0.0355849	0.0378024	0.0402159	0.0428474	0.0457266	0.0488857	0.0523566	0.0561804	0.0604145	0.0651181	0.0703504	0.0761658	0.0826158	0.0897513	0.0976254	0.106302	0.115848	0.126329	0.137577	0.148913	0.159594	0.168872	0.175942	0.179947	0.180026	0.175095	0.162604	0.139424	0.102431	0.0514766	-0.00611304	-0.0618553	-0.107461	-0.139698	-0.160747	-0.173056	-0.178941	-0.179718	-0.176241	-0.16936
22	0.022157	0.0233123	0.0245404	0.0258517	0.0272567	0.028766	0.0303901	0.0321396	0.0340253	0.0360626	0.0382702	0.0406668	0.0432726	0.0461143	0.0492207	0.0526205	0.0563478	0.0604469	0.0649632	0.0699415	0.0754202	0.0814324	0.0880109	0.0951817	0.102932	0.111236	0.120067	0.129228	0.138151	0.146221	0.152816	0.157147	0.158271	0.155241	0.147079	0.132613	0.110596	0.079782	0.0405232	-0.00282087	-0.0452704	-0.0819465	-0.110603	-0.131815	-0.146296	-0.154774	-0.15811	-0.157222	-0.153031
23	0.0225268	0.0236838	0.0249128	0.0262237	0.0276264	0.0291308	0.0307469	0.0324846	0.0343542	0.0363695	0.0385471	0.0409039	0.0434575	0.0462314	0.0492505	0.0525397	0.056126	0.0600398	0.0643123	0.0689739	0.0740492	0.0795574	0.0855178	0.0919346	0.0987292	0.105795	0.113024	0.120217	0.126971	0.13286	0.137436	0.139897	0.139102	0.133901	0.123298	0.107311	0.0863606	0.0608708	0.0316514	0.00048581	-0.0306921	-0.0599661	-0.0858828	-0.107484	-0.123838	-0.134183	-0.13909	-0.139741	-0.137324
24	0.0228251	0.0239774	0.0252005	0.0265033	0.0278951	0.029385	0.030982	0.0326954	0.0345345	0.0365117	0.0386413	0.0409379	0.0434169	0.0460974	0.0489997	0.0521444	0.0555514	0.0592402	0.0632304	0.0675408	0.0721813	0.0771541	0.0824612	0.0880877	0.0939246	0.0998308	0.105665	0.111229	0.116203	0.120251	0.123018	0.123811	0.121618	0.115414	0.104372	0.0889269	0.0700205	0.048594	0.0255164	0.00147471	-0.0228723	-0.0468533	-0.0694735	-0.089391	-0.105247	-0.115881	-0.12165	-0.123611	-0.122826
25	0.023054	0.0241957	0.0254063	0.026694	0.028067	0.0295334	0.0311014	0.0327793	0.0345754	0.0365003	0.0385662	0.0407855	0.0431708	0.0457369	0.0484993	0.0514732	0.0546725	0.058108	0.0617902	0.0657285	0.0699188	0.0743453	0.0789923	0.0838286	0.0887403	0.0935854	0.0982213	0.102457	0.105994	0.108524	0.109724	0.109084	0.105917	0.0995255	0.0893554	0.0757536	0.0594265	0.0410815	0.0213905	0.000936679	-0.0197107	-0.0399748	-0.059085	-0.0760629	-0.0899199	-0.0998052	-0.105922	-0.108961	-0.109614
26	0.0232157	0.0243413	0.0255335	0.0267995	0.0281463	0.0295813	0.0311114	0.032744	0.0344862	0.0363469	0.0383361	0.0404638	0.0427402	0.0451755	0.0477806	0.0505658	0.0535393	0.0567047	0.0600651	0.0636225	0.0673608	0.0712496	0.0752578	0.0793428	0.0833974	0.0872927	0.0908994	0.0940379	0.0964201	0.0977437	0.0977049	0.0959738	0.0921957	0.0860151	0.0771374	0.0656631	0.0518498	0.035956	0.0183989	-5.07098e-06	-0.0183778	-0.0358493	-0.0517644	-0.0656977	-0.0772351	-0.0860221	-0.0921579	-0.095952	-0.0977145
27	0.0233125	0.024417	0.0255854	0.0268237	0.0281379	0.0295342	0.0310187	0.0325975	0.0342767	0.0360634	0.0379654	0.0399904	0.042146	0.0444388	0.046875	0.0494611	0.0522001	0.0550893	0.0581256	0.0613044	0.0646019	0.0679784	0.0713938	0.0747989	0.0780936	0.0811605	0.0838823	0.0860968	0.0875458	0.0879586	0.0870671	0.0846584	0.0805715	0.0746469	0.0667448	0.0568506	0.0449995	0.0312273	0.0158009	-0.000432348	-0.0165353	-0.0315855	-0.0450387	-0.0567565	-0.0666203	-0.0745292	-0.0805183	-0.0846858	-0.0871299
28	0.0233477	0.0244268	0.0255665	0.0267718	0.0280477	0.0293993	0.0308316	0.0323495	0.0339583	0.0356632	0.0374699	0.0393838	0.0414103	0.0435525	0.0458131	0.0481948	0.0506964	0.0533102	0.0560273	0.058838	0.0617137	0.0646111	0.0674859	0.0702866	0.0729188	0.075274	0.0772433	0.0786858	0.0793908	0.0791389	0.0777135	0.0749621	0.0707917	0.0651117	0.057844	0.048992	0.0385916	0.0266793	0.0134708	-0.000367017	-0.0140977	-0.0269963	-0.038636	-0.0489101	-0.0577274	-0.065007	-0.070749	-0.0749904	-0.0777685
29	0.0233249	0.0243747	0.0254815	0.0266493	0.0278821	0.0291839	0.0305586	0.0320103	0.033543	0.0351602	0.0368658	0.0386632	0.0405554	0.0425428	0.0446251	0.0468017	0.0490682	0.0514125	0.0538216	0.0562815	0.0587616	0.0612177	0.0636053	0.0658729	0.0679325	0.0696834	0.0710246	0.071837	0.0719613	0.0712329	0.0694894	0.0666072	0.0624991	0.0570796	0.0502842	0.0421871	0.0329172	0.0226041	0.0114591	-0.00010021	-0.0116246	-0.0226693	-0.0329149	-0.0421758	-0.0502727	-0.0570453	-0.0624765	-0.0666154	-0.0695114
30	0.0232477	0.0242649	0.0253353	0.0264619	0.0276476	0.0288956	0.0302087	0.03159	0.0330424	0.0345683	0.0361693	0.0378473	0.0396033	0.0414354	0.0433406	0.045316	0.0473543	0.0494405	0.0515587	0.0536919	0.0558089	0.0578664	0.0598207	0.0616226	0.0631916	0.0644363	0.0652654	0.0655794	0.0652603	0.0641878	0.0622426	0.0593237	0.055347	0.0502292	0.0439143	0.0365229	0.0282458	0.019274	0.00981116	9.19475e-05	-0.00964402	-0.0191572	-0.028209	-0.036562	-0.0439789	-0.0502467	-0.0553393	-0.0593169	-0.0622401
31	0.02312	0.0241019	0.0251329	0.0262151	0.0273507	0.0285417	0.0297901	0.0310981	0.0324677	0.0338997	0.0353946	0.0369523	0.0385725	0.0402511	0.0419833	0.0437639	0.0455838	0.0474262	0.0492733	0.0511066	0.0528949	0.0545967	0.0561702	0.0575689	0.0587214	0.059548	0.0599684	0.0598998	0.0592523	0.057935	0.055858	0.0529447	0.0491315	0.0443551	0.038577	0.0319186	0.024565	0.0167016	0.00850472	0.000128774	-0.00827527	-0.0165552	-0.0245255	-0.0319651	-0.0386512	-0.0443831	-0.0491291	-0.0529357	-0.0558496
32	0.0229458	0.0238901	0.0248793	0.0259148	0.0269978	0.0281295	0.0293112	0.030544	0.0318291	0.0331663	0.0345546	0.0359927	0.0374789	0.0390075	0.0405721	0.042166	0.0437788	0.0453927	0.0469891	0.0485489	0.0500418	0.0514286	0.0526699	0.0537227	0.0545257	0.055011	0.0551107	0.0547559	0.0538747	0.0523951	0.050246	0.0473752	0.0437486	0.0393325	0.0341105	0.0281759	0.021666	0.0147179	0.00747042	6.62633e-05	-0.00735137	-0.0146389	-0.0216435	-0.0282024	-0.0341522	-0.0393446	-0.0437451	-0.047372	-0.0502437
33	0.0227293	0.0236341	0.0245798	0.0255668	0.0265955	0.0276665	0.0287801	0.0299368	0.0311371	0.0323796	0.0336623	0.0349829	0.0363384	0.037722	0.0391262	0.040543	0.0419613	0.0433631	0.0447298	0.0460422	0.0472715	0.0483815	0.0493356	0.0500947	0.0506073	0.0508173	0.0506688	0.0501045	0.0490644	0.0474884	0.0453176	0.0425215	0.0390961	0.0350385	0.0303532	0.0250943	0.0193354	0.0131501	0.00663789	-3.67849e-05	-0.00669953	-0.0131775	-0.0193376	-0.0250898	-0.0303459	-0.0350238	-0.0390887	-0.0425273	-0.0453264
34	0.0224745	0.0233387	0.0242395	0.0251768	0.0261503	0.0271598	0.0282051	0.0292859	0.030402	0.0315513	0.0327307	0.0339372	0.0351668	0.036412	0.0376644	0.0389154	0.0401532	0.0413604	0.0425188	0.0436095	0.044606	0.0454749	0.0461831	0.0466955	0.0469693	0.0469591	0.0466192	0.0459026	0.0447583	0.0431352	0.0409839	0.03829	0.0350721	0.0313499	0.0271434	0.0224731	0.0173602	0.0118255	0.00593677	-0.000121572	-0.00614694	-0.0119399	-0.0173823	-0.0224433	-0.0270961	-0.0313134	-0.0350612	-0.0383029	-0.0410018
35	0.0221854	0.0230082	0.0238636	0.0247507	0.0256687	0.0266169	0.0275944	0.0286004	0.0296341	0.0306928	0.0317727	0.03287	0.0339801	0.035095	0.0362059	0.0373037	0.0383766	0.0394078	0.0403796	0.0412742	0.042067	0.0427283	0.0432281	0.0435356	0.0436148	0.0434284	0.0429386	0.0421071	0.0408931	0.0392558	0.0371558	0.0345871	0.0315744	0.0281437	0.0243192	0.0201117	0.0155271	0.0105715	0.00529671	-0.000129297	-0.0055208	-0.0106952	-0.015552	-0.0200786	-0.0242669	-0.0281059	-0.0315641	-0.0346004	-0.0371739
36	0.0218662	0.0226475	0.0234572	0.0242942	0.0251573	0.026045	0.0269562	0.0278896	0.0288439	0.0298158	0.0308012	0.0317956	0.032794	0.0337884	0.0347696	0.0357285	0.0366534	0.0375281	0.0383358	0.0390594	0.0396766	0.0401612	0.0404866	0.0406257	0.0405469	0.0402171	0.0396034	0.038675	0.0374058	0.0357705	0.0337444	0.0313191	0.0285009	0.0252969	0.0217189	0.0178093	0.0136232	0.00921523	0.00464735	-1.16331e-06	-0.00464832	-0.00921248	-0.0136212	-0.0178118	-0.0217221	-0.0252939	-0.0284985	-0.0313211	-0.0337467
[truncated: 22 more columns]
