# Supplementary material for: Strong confinement of active microalgae leads to inversion of vortex flow and enhanced mixing
Source: eLife. 2021 Nov 22;10:e67663. doi: 10.7554/eLife.67663 (PMC8758135; doi:10.7554/eLife.67663)
Supplement: Figure 4—source data 2. [file elife-67663-fig4-data2.xlsx]

## Sheet: Sheet1
Figure 4C: Theoretical H10 2-Gaussian Brinkman flow
The [X,Y] meshgrid for flow-field plots ranges from -33 to 37 micron in X and -37 to 36 micron in Y. Gridsize is 1 micron. i.e. [X,Y] = meshgrid [-33:1:37,-37:1:36] micron.
Cell centre is at the origin of this meshgrid i.e. at [0,0].
X-component of velocity field (v_x) for H10 2-Gaussian Brinkman flow
Y↓ & X→	-33	-32	-31	-30	-29	-28	-27	-26	-25	-24	-23	-22	-21	-20	-19	-18	-17	-16	-15	-14	-13	-12	-11	-10	-9	-8	-7	-6	-5	-4	-3	-2	-1	0	1	2	3	4	5	6	7	8	9	10	11	12	13	14	15
-37	-0.00193495	-0.00174683	-0.00153609	-0.0013011	-0.00104028	-0.000751816	-0.000432778	-7.98715e-05	0.000309874	0.00073925	0.00121068	0.00172657	0.00229083	0.00290817	0.00358204	0.00431507	0.00511006	0.00597	0.00689709	0.00789283	0.00895786	0.0100919	0.0112925	0.0125541	0.0138712	0.0152387	0.0166473	0.0180806	0.0195209	0.02095	0.0223483	0.0236931	0.0249605	0.0261248	0.0271604	0.0280445	0.0287561	0.0292783	0.0295967	0.0297041	0.0295967	0.0292783	0.0287562	0.0280445	0.0271604	0.0261248	0.0249609	0.0236935	0.0223486
-36	-0.00231034	-0.00213171	-0.00193366	-0.00171265	-0.00146514	-0.00118776	-0.000878155	-0.000534212	-0.000152784	0.000269686	0.000736687	0.0012517	0.00181848	0.00244103	0.00312383	0.00387171	0.00468836	0.00557662	0.00653954	0.00758036	0.00870084	0.00990116	0.0111797	0.0125327	0.013955	0.0154394	0.0169755	0.0185476	0.020138	0.0217254	0.0232869	0.0247959	0.0262242	0.0275408	0.0287154	0.029721	0.030533	0.0311302	0.0314948	0.0316178	0.0314948	0.0311302	0.0305331	0.0297209	0.0287151	0.0275406	0.0262242	0.0247958	0.0232866
-35	-0.00270507	-0.00254197	-0.0023582	-0.00215077	-0.0019167	-0.00165304	-0.00135702	-0.00102588	-0.000656153	-0.000244041	0.000214524	0.000723761	0.00128799	0.00191164	0.00259988	0.00335831	0.00419172	0.00510424	0.00610012	0.0071837	0.0083579	0.00962405	0.0109818	0.0124289	0.0139607	0.0155693	0.0172437	0.0189683	0.0207243	0.0224876	0.0242316	0.0259249	0.0275345	0.0290251	0.0303614	0.0315098	0.0324386	0.0331227	0.0335409	0.0336822	0.0335409	0.0331226	0.0324386	0.0315097	0.0303616	0.0290252	0.0275344	0.0259244	0.0242311
-34	-0.0031193	-0.00297492	-0.00280751	-0.00261535	-0.00239674	-0.00214971	-0.0018708	-0.00155606	-0.00120168	-0.00080387	-0.000358158	0.000140275	0.000696566	0.00131606	0.0020045	0.00276788	0.00361219	0.00454347	0.00556738	0.00668925	0.00791333	0.0092427	0.0106786	0.0122202	0.0138638	0.0156018	0.0174234	0.0193122	0.0212483	0.0232048	0.0251513	0.027051	0.0288654	0.0305542	0.0320762	0.0333892	0.0344532	0.035238	0.0357186	0.0358813	0.0357187	0.0352379	0.0344531	0.0333893	0.0320768	0.0305546	0.0288653	0.0270505	0.0251509
-33	-0.00355318	-0.00342786	-0.00327938	-0.00310626	-0.00290701	-0.00267982	-0.00242091	-0.0021259	-0.00179082	-0.00141174	-0.000983716	-0.000501248	4.14453e-05	0.000650355	0.00133203	0.00209341	0.00294184	0.00388493	0.00492985	0.00608336	0.00735143	0.00873918	0.0102498	0.0118841	0.0136398	0.0155106	0.017486	0.0195492	0.0216788	0.0238455	0.0260152	0.0281453	0.0301909	0.0321044	0.0338371	0.0353377	0.0365571	0.0374585	0.0380113	0.0381987	0.0380114	0.0374584	0.036557	0.0353378	0.033838	0.032105	0.0301908	0.0281449	0.0260149
-32	-0.00400657	-0.00389921	-0.00377248	-0.00362319	-0.00344818	-0.00324424	-0.00300806	-0.00273622	-0.00242474	-0.0020693	-0.00166423	-0.00120329	-0.000680414	-8.95717e-05	0.000576997	0.00132819	0.0021727	0.00311902	0.00417586	0.00535208	0.00665589	0.00809464	0.00967377	0.0113962	0.0132619	0.0152661	0.0173995	0.0196448	0.0219797	0.0243726	0.0267862	0.0291715	0.0314762	0.0336428	0.0356125	0.0373245	0.0387212	0.0397568	0.0403928	0.0406085	0.0403928	0.0397567	0.0387212	0.0373245	0.035613	0.0336431	0.0314762	0.0291713	0.026786
-31	-0.00447839	-0.00439125	-0.00428836	-0.00416516	-0.00401708	-0.00383981	-0.00363048	-0.00338651	-0.00310373	-0.00277718	-0.00240087	-0.00196829	-0.00147296	-0.000908272	-0.000265294	0.000466408	0.00129679	0.00223544	0.00329285	0.00448028	0.00580839	0.00728707	0.00892442	0.0107263	0.0126952	0.0148289	0.0171196	0.0195506	0.022099	0.0247311	0.0274058	0.030068	0.0326573	0.0351044	0.0373385	0.0392882	0.0408851	0.0420729	0.0428034	0.0430514	0.0428035	0.0420728	0.0408852	0.039288	0.0373387	0.0351044	0.0326573	0.030068	0.0274058
-30	-0.00496708	-0.00490532	-0.0048279	-0.00473102	-0.00461086	-0.00446372	-0.00428648	-0.004076	-0.00382753	-0.00353563	-0.00319453	-0.00279822	-0.00233927	-0.00180937	-0.0011989	-0.000497318	0.000306502	0.00122419	0.00226838	0.00345258	0.00478996	0.00629328	0.00797389	0.00984133	0.0119014	0.0141548	0.0165961	0.0192105	0.0219753	0.0248543	0.0278025	0.0307583	0.0336531	0.0364053	0.038931	0.0411448	0.0429647	0.0443224	0.0451588	0.0454431	0.0451589	0.0443222	0.0429649	0.0411445	0.0389311	0.0364053	0.0336531	0.0307582	0.0278027
-29	-0.00547036	-0.00543722	-0.00538778	-0.00531959	-0.0052302	-0.005117	-0.00497627	-0.00480383	-0.00459487	-0.00434423	-0.00404594	-0.00369355	-0.00327899	-0.00279325	-0.00222634	-0.00156758	-0.000804524	7.67005e-05	0.00109089	0.00225366	0.0035809	0.00508862	0.0067919	0.00870442	0.0108361	0.0131913	0.0157679	0.018554	0.0215279	0.0246518	0.0278771	0.0311353	0.0343491	0.037424	0.0402619	0.0427611	0.0448233	0.0463661	0.0473183	0.0476425	0.0473184	0.0463659	0.0448235	0.0427608	0.0402621	0.0374241	0.0343491	0.0311354	0.0278772
-28	-0.00598648	-0.00598305	-0.00596473	-0.00592949	-0.00587536	-0.0058	-0.0056993	-0.00556861	-0.00540403	-0.00520161	-0.00495424	-0.00465329	-0.00429096	-0.00385973	-0.00334943	-0.00274801	-0.00204152	-0.00121448	-0.00025019	0.000869111	0.00216216	0.00364866	0.00534766	0.00727728	0.00945207	0.0118815	0.0145678	0.0175021	0.0206651	0.0240188	0.0275124	0.0310702	0.0346051	0.0380094	0.04117	0.0439672	0.0462843	0.0480231	0.0490983	0.0494648	0.0490984	0.0480229	0.0462846	0.0439669	0.0411703	0.0380094	0.0346053	0.0310706	0.027512
-27	-0.00651551	-0.00654285	-0.00655799	-0.00655883	-0.0065433	-0.006509	-0.00645187	-0.00636743	-0.00625253	-0.006104	-0.00591411	-0.0056731	-0.0053735	-0.00500885	-0.00456871	-0.00403982	-0.00340715	-0.00265427	-0.00176288	-0.000712996	0.000517011	0.00195044	0.00361044	0.00551979	0.00769828	0.0101612	0.0129164	0.0159591	0.0192732	0.0228223	0.0265547	0.0303877	0.0342256	0.0379468	0.0414227	0.0445144	0.0470861	0.049022	0.0502213	0.0506308	0.0502215	0.0490217	0.0470864	0.0445141	0.0414229	0.0379467	0.0342257	0.0303883	0.026554
-26	-0.00705668	-0.00711618	-0.00716642	-0.00720525	-0.00723052	-0.00723991	-0.00722999	-0.00719696	-0.00713733	-0.00704739	-0.00692048	-0.00674855	-0.00652394	-0.00623897	-0.00588281	-0.00544227	-0.00490217	-0.00424557	-0.0034529	-0.00250206	-0.00136881	-2.66761e-05	0.00155143	0.00339319	0.00552392	0.00796532	0.0107314	0.0138232	0.0172294	0.020916	0.0248315	0.0288887	0.0329844	0.0369842	0.0407438	0.0441052	0.0469131	0.0490336	0.0503499	0.0508	0.0503501	0.0490332	0.0469135	0.0441048	0.040744	0.0369841	0.0329842	0.0288888	0.0248311
-25	-0.00760588	-0.0076995	-0.00778668	-0.00786545	-0.00793385	-0.0079898	-0.00803065	-0.00805339	-0.0080541	-0.00802839	-0.00797113	-0.00787664	-0.00773721	-0.00754384	-0.00728569	-0.00695055	-0.00652341	-0.00598698	-0.00532089	-0.00450193	-0.00350398	-0.00229787	-0.000852928	0.000863164	0.00288111	0.00522898	0.00792749	0.010985	0.014396	0.0181304	0.0221382	0.0263309	0.0306006	0.0348016	0.0387762	0.0423489	0.0453463	0.0476174	0.04903	0.0495138	0.0490302	0.047617	0.0453467	0.0423484	0.0387765	0.0348016	0.0306002	0.0263307	0.022138
-24	-0.00815952	-0.00828924	-0.00841523	-0.00853594	-0.00864986	-0.00875536	-0.00885032	-0.00893229	-0.0089977	-0.00904245	-0.00906232	-0.00905273	-0.00900667	-0.00891561	-0.00876954	-0.00855728	-0.00826424	-0.00787297	-0.00736316	-0.00671174	-0.00589176	-0.00487216	-0.00361947	-0.00209754	-0.000270934	0.0018943	0.00442559	0.0073392	0.010637	0.0142939	0.0182644	0.0224613	0.026776	0.0310555	0.0351325	0.038818	0.0419241	0.0442858	0.0457578	0.0462627	0.0457581	0.0442853	0.0419246	0.0388174	0.0351328	0.0310554	0.0267757	0.0224613	0.0182637
-23	-0.00871663	-0.00888318	-0.00904897	-0.00921304	-0.0093744	-0.00953194	-0.00968381	-0.00982782	-0.00996146	-0.010082	-0.0101855	-0.0102676	-0.0103227	-0.0103444	-0.0103239	-0.0102505	-0.0101109	-0.0098896	-0.00956732	-0.00912116	-0.00852425	-0.00774551	-0.00675042	-0.00550038	-0.0039565	-0.00207991	0.000162695	0.0027949	0.00582631	0.00924006	0.0129978	0.0170173	0.0211931	0.0253715	0.0293829	0.0330315	0.0361217	0.0384799	0.0399531	0.0404593	0.0399534	0.0384793	0.0361222	0.0330309	0.0293832	0.0253715	0.0211929	0.0170177	0.012997
-22	-0.00927528	-0.00947857	-0.0096846	-0.00989292	-0.0101031	-0.0103145	-0.0105253	-0.0107335	-0.0109382	-0.0111385	-0.0113307	-0.0115106	-0.0116743	-0.0118186	-0.0119358	-0.0120155	-0.012047	-0.0120194	-0.0119155	-0.0117124	-0.0113846	-0.0109032	-0.0102353	-0.00934168	-0.00818209	-0.00671442	-0.0049012	-0.00271314	-0.000133053	0.00283335	0.0061584	0.00976861	0.0135668	0.0174077	0.0211288	0.024538	0.027442	0.0296675	0.0310614	0.0315413	0.0310617	0.0296669	0.0274425	0.0245375	0.0211292	0.0174077	0.0135665	0.00976912	0.00615868
-21	-0.00983039	-0.0100711	-0.0103182	-0.0105716	-0.0108313	-0.0110971	-0.0113679	-0.0116423	-0.0119204	-0.0122027	-0.0124869	-0.0127693	-0.0130482	-0.0133227	-0.0135871	-0.013833	-0.0140529	-0.0142399	-0.0143803	-0.014454	-0.014439	-0.0143106	-0.0140391	-0.0135882	-0.0129189	-0.0119888	-0.0107587	-0.00919536	-0.00727496	-0.00499123	-0.00235875	0.000563406	0.00369383	0.00690641	0.0100578	0.0129731	0.0154751	0.0174032	0.0186149	0.0190331	0.0186152	0.0174027	0.0154756	0.0129726	0.0100583	0.0069066	0.00369332	0.000563833	-0.00235739
-20	-0.0103778	-0.010657	-0.0109458	-0.0112447	-0.011554	-0.0118742	-0.0122051	-0.0125467	-0.0128997	-0.0132651	-0.0136425	-0.0140307	-0.0144297	-0.0148394	-0.0152576	-0.0156803	-0.0161032	-0.0165217	-0.016927	-0.0173061	-0.017643	-0.0179186	-0.0181088	-0.0181835	-0.0181087	-0.0178458	-0.0173569	-0.0166072	-0.0155675	-0.0142209	-0.0125674	-0.0106444	-0.00850874	-0.00625529	-0.00399477	-0.00186798	-1.91819e-05	0.00141886	0.00232758	0.00264254	0.00232783	0.00141838	-1.87964e-05	-0.0018684	-0.00399431	-0.00625505	-0.00850937	-0.0106442	-0.0125656
-19	-0.0109164	-0.0112339	-0.011564	-0.0119078	-0.0122662	-0.0126402	-0.0130309	-0.0134395	-0.0138673	-0.0143158	-0.0147866	-0.0152813	-0.0158014	-0.0163483	-0.0169235	-0.0175281	-0.0181618	-0.018823	-0.0195087	-0.0202147	-0.0209333	-0.0216532	-0.022359	-0.0230299	-0.0236412	-0.0241621	-0.0245604	-0.0248026	-0.024857	-0.0246971	-0.0243074	-0.0236975	-0.0228906	-0.0219378	-0.0209027	-0.0198736	-0.018943	-0.0181993	-0.0177218	-0.0175544	-0.0177216	-0.0181996	-0.0189428	-0.0198738	-0.0209024	-0.0219376	-0.0228911	-0.0236973	-0.0243058
-18	-0.0114441	-0.0117988	-0.0121689	-0.0125563	-0.0129626	-0.0133897	-0.0138394	-0.0143133	-0.0148141	-0.0153444	-0.0159074	-0.0165066	-0.0171457	-0.0178285	-0.0185601	-0.0193462	-0.0201914	-0.0210991	-0.0220735	-0.0231186	-0.0242365	-0.0254266	-0.0266851	-0.0280042	-0.0293718	-0.0307696	-0.0321754	-0.0335609	-0.0348952	-0.0361438	-0.0372751	-0.0382656	-0.0390978	-0.0397665	-0.0402737	-0.0406372	-0.0408794	-0.0410268	-0.0411046	-0.0411277	-0.0411045	-0.0410269	-0.0408793	-0.0406373	-0.0402736	-0.0397664	-0.0390981	-0.0382653	-0.037274
-17	-0.0119569	-0.0123472	-0.012756	-0.0131856	-0.0136385	-0.0141171	-0.0146237	-0.0151605	-0.015731	-0.0163397	-0.0169913	-0.0176911	-0.0184447	-0.0192587	-0.0201415	-0.0211033	-0.0221539	-0.0233032	-0.0245625	-0.0259449	-0.0274632	-0.0291291	-0.030953	-0.0329426	-0.0351017	-0.0374283	-0.0399137	-0.0425392	-0.0452779	-0.048089	-0.0509252	-0.0537272	-0.0564312	-0.0589662	-0.0612607	-0.0632473	-0.0648627	-0.0660572	-0.066789	-0.0670366	-0.066789	-0.0660571	-0.0648628	-0.0632472	-0.0612609	-0.0589661	-0.0564313	-0.053727	-0.0509246
-16	-0.0124512	-0.0128755	-0.0133212	-0.0137915	-0.0142891	-0.0148169	-0.0153774	-0.0159734	-0.0166095	-0.0172916	-0.0180261	-0.01882	-0.019681	-0.0206177	-0.021642	-0.0227682	-0.0240114	-0.0253876	-0.0269159	-0.0286187	-0.0305198	-0.0326446	-0.0350184	-0.0376662	-0.0406099	-0.0438661	-0.0474431	-0.0513348	-0.0555213	-0.0599577	-0.0645821	-0.0692986	-0.0739956	-0.0785297	-0.0827492	-0.0864913	-0.0895974	-0.0919317	-0.0933765	-0.0938694	-0.0933766	-0.0919313	-0.0895977	-0.0864909	-0.0827494	-0.0785296	-0.0739955	-0.0692989	-0.0645817
-15	-0.0129252	-0.0133817	-0.0138624	-0.0143707	-0.0149099	-0.0154834	-0.016094	-0.0167449	-0.0174416	-0.0181911	-0.0190012	-0.0198801	-0.0208378	-0.0218851	-0.0230368	-0.0243103	-0.0257253	-0.027304	-0.029073	-0.0310632	-0.0333093	-0.0358497	-0.0387246	-0.0419766	-0.0456458	-0.0497685	-0.054371	-0.0594617	-0.0650297	-0.071028	-0.0773822	-0.0839622	-0.0906096	-0.0971098	-0.10323	-0.108712	-0.113299	-0.116769	-0.118924	-0.119662	-0.118925	-0.116768	-0.1133	-0.108711	-0.103231	-0.0971096	-0.0906094	-0.0839627	-0.0773817
-14	-0.0133767	-0.0138635	-0.0143767	-0.01492	-0.0154973	-0.0161122	-0.0167681	-0.0174688	-0.0182204	-0.0190303	-0.019907	-0.0208599	-0.0219008	-0.0230432	-0.0243038	-0.0257019	-0.027261	-0.0290089	-0.0309785	-0.0332082	-0.0357418	-0.0386292	-0.041924	-0.0456845	-0.049968	-0.0548292	-0.0603115	-0.0664377	-0.0732066	-0.0805711	-0.0884472	-0.0966751	-0.105056	-0.113311	-0.121134	-0.128179	-0.1341	-0.138593	-0.141391	-0.14235	-0.141391	-0.138592	-0.134101	-0.128178	-0.121134	-0.11331	-0.105056	-0.0966757	-0.0884463
-13	-0.0138028	-0.0143175	-0.0148607	-0.0154363	-0.0160482	-0.0167001	-0.0173961	-0.0181407	-0.0189402	-0.0198022	-0.0207356	-0.0217504	-0.0228597	-0.0240786	-0.0254254	-0.0269206	-0.0285907	-0.0304669	-0.032587	-0.0349945	-0.0377402	-0.0408826	-0.0444858	-0.0486203	-0.0533566	-0.0587648	-0.064902	-0.0718035	-0.0794764	-0.0878752	-0.0969099	-0.106399	-0.116112	-0.12572	-0.134862	-0.14312	-0.150079	-0.155371	-0.15867	-0.159801	-0.15867	-0.15537	-0.15008	-0.143119	-0.134863	-0.12572	-0.116111	-0.106399	-0.0969088
-12	-0.0142009	-0.0147409	-0.0153117	-0.0159168	-0.0165598	-0.0172444	-0.0179751	-0.018757	-0.0195967	-0.0205016	-0.0214809	-0.0225448	-0.0237065	-0.0249816	-0.0263891	-0.0279507	-0.0296942	-0.0316524	-0.033865	-0.0363783	-0.0392471	-0.0425345	-0.0463106	-0.0506531	-0.0556408	-0.061353	-0.067856	-0.0751931	-0.0833777	-0.0923667	-0.102068	-0.112287	-0.122778	-0.133181	-0.1431	-0.152078	-0.159654	-0.165422	-0.169019	-0.170254	-0.16902	-0.16542	-0.159655	-0.152076	-0.143101	-0.133181	-0.122777	-0.112288	-0.102067
-11	-0.0145694	-0.0151324	-0.0157277	-0.0163588	-0.0170291	-0.0177421	-0.0185025	-0.0193154	-0.0201874	-0.0211258	-0.0221397	-0.0232389	-0.0244363	-0.0257468	-0.0271893	-0.0287857	-0.0305632	-0.0325538	-0.034797	-0.0373389	-0.0402343	-0.0435465	-0.0473463	-0.0517126	-0.0567257	-0.0624669	-0.0690053	-0.076388	-0.0846313	-0.0936934	-0.103483	-0.113807	-0.124417	-0.134949	-0.145001	-0.154105	-0.161793	-0.167648	-0.171302	-0.172556	-0.171302	-0.167646	-0.161794	-0.154103	-0.145002	-0.134949	-0.124417	-0.113808	-0.103481
-10	-0.0149077	-0.0154911	-0.0161077	-0.016761	-0.0174544	-0.0181916	-0.0189768	-0.0198145	-0.0207111	-0.0216739	-0.022711	-0.0238317	-0.025048	-0.0263738	-0.0278266	-0.0294263	-0.0311982	-0.0331719	-0.0353837	-0.0378765	-0.0407008	-0.0439155	-0.0475862	-0.0517867	-0.0565916	-0.0620765	-0.068306	-0.0753256	-0.0831511	-0.091741	-0.101008	-0.110773	-0.120803	-0.130756	-0.14025	-0.148847	-0.156106	-0.161634	-0.165083	-0.166267	-0.165084	-0.161633	-0.156108	-0.148846	-0.140251	-0.130756	-0.120803	-0.110774	-0.101006
-9	-0.0152167	-0.0158171	-0.0164516	-0.0171235	-0.0178361	-0.0185928	-0.0193974	-0.020254	-0.0211682	-0.0221467	-0.0231968	-0.0243266	-0.0255466	-0.0268689	-0.0283085	-0.0298826	-0.0316127	-0.033524	-0.0356474	-0.0380191	-0.0406818	-0.0436854	-0.0470852	-0.0509432	-0.0553221	-0.0602845	-0.0658838	-0.0721577	-0.079117	-0.0867227	-0.0948964	-0.103482	-0.112277	-0.120985	-0.129277	-0.136774	-0.143098	-0.147909	-0.15091	-0.15194	-0.15091	-0.147908	-0.143099	-0.136773	-0.129277	-0.120985	-0.112277	-0.103483	-0.094894
-8	-0.0154953	-0.0161095	-0.0167588	-0.0174462	-0.0181744	-0.0189462	-0.0197651	-0.020635	-0.0215606	-0.0225472	-0.0236012	-0.0247293	-0.0259398	-0.0272421	-0.0286482	-0.0301716	-0.0318288	-0.0336389	-0.0356249	-0.037814	-0.0402378	-0.0429331	-0.0459405	-0.0493049	-0.0530712	-0.0572838	-0.0619792	-0.0671806	-0.0728912	-0.0790764	-0.0856715	-0.092551	-0.0995558	-0.106456	-0.113	-0.118897	-0.123857	-0.127624	-0.129971	-0.130775	-0.129971	-0.127624	-0.123858	-0.118896	-0.113001	-0.106456	-0.0995558	-0.0925521	-0.0856709
-7	-0.0157394	-0.0163664	-0.0170288	-0.0177289	-0.0184694	-0.0192527	-0.0200819	-0.0209603	-0.0218918	-0.0228803	-0.0239306	-0.0250479	-0.0262383	-0.0275082	-0.0288655	-0.0303192	-0.0318799	-0.0335593	-0.0353713	-0.037332	-0.0394597	-0.0417753	-0.0443012	-0.0470617	-0.0500801	-0.0533783	-0.0569721	-0.0608678	-0.0650588	-0.0695154	-0.0741887	-0.0789921	-0.0838187	-0.0885209	-0.0929379	-0.0968881	-0.100191	-0.102688	-0.104239	-0.104769	-0.104239	-0.102687	-0.100191	-0.0968876	-0.0929382	-0.0885208	-0.0838186	-0.0789928	-0.0741894
-6	-0.0159479	-0.0165873	-0.017261	-0.0179715	-0.0187215	-0.0195134	-0.0203497	-0.0212329	-0.0221657	-0.023151	-0.0241919	-0.0252921	-0.026455	-0.0276838	-0.0289823	-0.0303543	-0.0318035	-0.033334	-0.0349497	-0.0366545	-0.0384521	-0.040346	-0.0423388	-0.0444321	-0.0466257	-0.0489166	-0.0512987	-0.0537604	-0.0562854	-0.0588478	-0.0614161	-0.0639473	-0.0663932	-0.0686951	-0.0707917	-0.0726192	-0.0741156	-0.0752287	-0.0759134	-0.076146	-0.0759135	-0.0752286	-0.0741157	-0.072619	-0.0707918	-0.0686951	-0.0663932	-0.0639474	-0.0614166
-5	-0.0161243	-0.0167732	-0.0174558	-0.0181746	-0.0189317	-0.0197296	-0.0205701	-0.021455	-0.0223859	-0.0233647	-0.0243931	-0.0254729	-0.0266047	-0.0277885	-0.0290236	-0.030309	-0.0316419	-0.0330182	-0.0344317	-0.0358739	-0.037334	-0.0387979	-0.0402483	-0.0416642	-0.0430218	-0.0442939	-0.0454524	-0.0464687	-0.0473169	-0.047976	-0.0484324	-0.0486877	-0.0487526	-0.0486569	-0.0484386	-0.0481503	-0.0478478	-0.0475839	-0.0474068	-0.0473428	-0.0474067	-0.0475841	-0.0478475	-0.0481505	-0.0484384	-0.0486569	-0.0487527	-0.0486874	-0.0484326
-4	-0.0162701	-0.016925	-0.017614	-0.0183389	-0.0191013	-0.0199031	-0.0207456	-0.0216301	-0.0225573	-0.023528	-0.0245427	-0.0256014	-0.0267021	-0.0278411	-0.0290141	-0.0302158	-0.0314372	-0.0326665	-0.0338876	-0.035081	-0.0362217	-0.0372798	-0.0382194	-0.0389986	-0.039572	-0.0398901	-0.0399053	-0.0395734	-0.0388603	-0.0377509	-0.0362491	-0.034398	-0.0322628	-0.0299552	-0.0276042	-0.0253694	-0.0234132	-0.0218847	-0.0209164	-0.0205803	-0.0209162	-0.0218852	-0.0234127	-0.0253698	-0.027604	-0.0299552	-0.0322631	-0.0343975	-0.0362492
-3	-0.0163838	-0.0170433	-0.0177369	-0.0184659	-0.0192317	-0.0200358	-0.0208791	-0.0217626	-0.022686	-0.0236488	-0.0246501	-0.025689	-0.0267612	-0.0278604	-0.0289787	-0.0301068	-0.0312306	-0.0323315	-0.0333853	-0.0343625	-0.0352268	-0.035934	-0.0364328	-0.0366634	-0.0365622	-0.0360612	-0.0350962	-0.033611	-0.0315652	-0.028949	-0.0257817	-0.022142	-0.0181422	-0.0139628	-0.00980966	-0.00593173	-0.00258125	1.29379e-05	0.0016475	0.00221274	0.00164788	1.21394e-05	-0.00258053	-0.00593246	-0.00980925	-0.0139628	-0.0181425	-0.0221413	-0.0257818
-2	-0.0164648	-0.017128	-0.0178248	-0.0185564	-0.0193241	-0.0201293	-0.0209728	-0.0218555	-0.0227759	-0.023732	-0.0247222	-0.0257448	-0.026794	-0.0278619	-0.0289376	-0.0300086	-0.0310563	-0.0320573	-0.0329815	-0.0337918	-0.0344428	-0.0348796	-0.0350391	-0.0348483	-0.0342298	-0.0331012	-0.0313865	-0.0290211	-0.0259606	-0.022199	-0.0177672	-0.0127719	-0.00736127	-0.001768	0.0037447	0.0088608	0.013261	0.0166568	0.0187924	0.0195298	0.0187929	0.0166558	0.0132619	0.00885989	0.00374523	-0.00176799	-0.00736175	-0.0127709	-0.0177671
-1	-0.016513	-0.0171784	-0.0178771	-0.0186102	-0.0193792	-0.020185	-0.0210286	-0.0219101	-0.0228279	-0.0237798	-0.0247633	-0.0257755	-0.0268099	-0.0278577	-0.0289065	-0.0299412	-0.0309407	-0.0318786	-0.0327208	-0.0334258	-0.0339423	-0.0342089	-0.034155	-0.0336992	-0.0327559	-0.0312338	-0.0290493	-0.0261332	-0.0224386	-0.0179621	-0.0127418	-0.00690217	-0.000613977	0.00585794	0.0122147	0.018099	0.0231499	0.0270424	0.0294883	0.0303325	0.0294889	0.0270413	0.0231509	0.0180979	0.0122154	0.00585797	-0.000614693	-0.00690136	-0.0127414
0	-0.0165287	-0.0171946	-0.0178939	-0.0186278	-0.0193974	-0.0202038	-0.0210472	-0.0219276	-0.0228438	-0.0237944	-0.0247762	-0.0257852	-0.0268146	-0.0278554	-0.0288948	-0.0299171	-0.0309001	-0.0318164	-0.0326307	-0.0332996	-0.0337703	-0.0339787	-0.033852	-0.0333059	-0.0322518	-0.0305957	-0.0282516	-0.0251483	-0.0212382	-0.0165189	-0.0110309	-0.004905	0.00168049	0.00844984	0.0150922	0.0212363	0.0265071	0.0305675	0.0331183	0.0339984	0.0331188	0.0305663	0.0265081	0.0212351	0.0150929	0.00844991	0.00167949	-0.00490458	-0.0110303
1	-0.0165123	-0.0171772	-0.017876	-0.0186096	-0.0193791	-0.0201854	-0.0210288	-0.0219092	-0.022826	-0.0237783	-0.0247629	-0.0257756	-0.0268098	-0.0278575	-0.0289063	-0.0299411	-0.0309406	-0.0318785	-0.0327208	-0.0334258	-0.0339423	-0.0342088	-0.0341549	-0.0336992	-0.0327559	-0.0312337	-0.0290494	-0.0261335	-0.0224393	-0.0179631	-0.0127426	-0.00690286	-0.00061483	0.00585671	0.0122131	0.018097	0.0231478	0.0270403	0.0294861	0.0303301	0.0294866	0.0270392	0.0231489	0.0180962	0.0122139	0.00585673	-0.000615763	-0.00690234	-0.0127424
2	-0.016464	-0.0171269	-0.0178238	-0.0185559	-0.0193241	-0.0201296	-0.020973	-0.0218547	-0.0227743	-0.0237311	-0.0247225	-0.0257452	-0.0267938	-0.0278615	-0.0289377	-0.0300089	-0.0310565	-0.0320575	-0.0329816	-0.0337919	-0.0344429	-0.0348797	-0.0350393	-0.0348484	-0.0342299	-0.0331012	-0.0313862	-0.0290209	-0.0259609	-0.0221995	-0.0177669	-0.0127708	-0.00735964	-0.00176611	0.0037468	0.00886324	0.0132639	0.0166603	0.0187961	0.0195336	0.0187965	0.0166593	0.0132651	0.00886271	0.0037475	-0.00176621	-0.00736014	-0.0127698	-0.0177676
3	-0.0163836	-0.0170435	-0.0177371	-0.0184659	-0.0192317	-0.0200359	-0.0208794	-0.0217627	-0.022686	-0.0236493	-0.0246513	-0.0256899	-0.0267612	-0.0278601	-0.0289788	-0.0301073	-0.031231	-0.0323316	-0.0333851	-0.0343623	-0.0352267	-0.035934	-0.0364326	-0.0366631	-0.036562	-0.0360609	-0.0350959	-0.0336109	-0.0315654	-0.0289496	-0.0257822	-0.0221428	-0.0181434	-0.0139644	-0.00981114	-0.00593329	-0.00258357	9.74196e-06	0.00164395	0.00220922	0.00164448	8.93404e-06	-0.00258339	-0.00593492	-0.00981141	-0.0139645	-0.0181434	-0.0221417	-0.0257834
4	-0.0162707	-0.0169262	-0.0176149	-0.0183391	-0.0191012	-0.0199033	-0.0207462	-0.0216306	-0.0225576	-0.0235287	-0.0245438	-0.0256024	-0.0267024	-0.027841	-0.029014	-0.030216	-0.0314377	-0.0326668	-0.0338875	-0.0350807	-0.0362219	-0.0372803	-0.0382199	-0.0389989	-0.0395723	-0.0398909	-0.0399071	-0.0395753	-0.038861	-0.0377506	-0.0362489	-0.0343984	-0.0322635	-0.0299551	-0.0276021	-0.025366	-0.0234106	-0.0218835	-0.0209156	-0.0205791	-0.0209148	-0.0218841	-0.0234119	-0.0253692	-0.0276036	-0.0299552	-0.0322632	-0.0343978	-0.03625
5	-0.016125	-0.0167737	-0.017456	-0.0181746	-0.0189317	-0.0197298	-0.0205703	-0.0214548	-0.0223853	-0.0233643	-0.0243933	-0.0254731	-0.0266045	-0.0277879	-0.029023	-0.0303086	-0.0316418	-0.0330181	-0.0344311	-0.0358733	-0.0373335	-0.0387976	-0.0402479	-0.0416634	-0.0430205	-0.0442934	-0.0454537	-0.0464703	-0.0473161	-0.0479731	-0.0484294	-0.0486855	-0.0487507	-0.0486542	-0.0484341	-0.0481449	-0.0478432	-0.0475809	-0.0474042	-0.0473398	-0.0474036	-0.0475811	-0.0478447	-0.0481476	-0.0484356	-0.0486542	-0.0487504	-0.0486855	-0.0484301
6	-0.0159466	-0.0165859	-0.0172602	-0.0179714	-0.0187219	-0.0195136	-0.0203495	-0.0212322	-0.0221647	-0.0231503	-0.0241917	-0.0252917	-0.0264541	-0.0276831	-0.0289821	-0.0303544	-0.0318037	-0.0333342	-0.0349499	-0.0366547	-0.0384525	-0.0403467	-0.0423398	-0.044433	-0.0466264	-0.0489186	-0.0513035	-0.0537667	-0.0562904	-0.0588514	-0.0614199	-0.0639521	-0.0663989	-0.0687013	-0.0707982	-0.072626	-0.0741232	-0.075237	-0.0759221	-0.0761547	-0.0759221	-0.0752369	-0.0741237	-0.0726265	-0.0707986	-0.0687012	-0.0663989	-0.0639526	-0.0614202
7	-0.0157357	-0.0163641	-0.0170277	-0.0177289	-0.0184698	-0.019253	-0.0200818	-0.0209599	-0.0218912	-0.0228799	-0.0239304	-0.0250475	-0.0262375	-0.0275076	-0.0288655	-0.0303195	-0.03188	-0.0335592	-0.0353711	-0.0373316	-0.0394591	-0.0417746	-0.0443004	-0.0470604	-0.050078	-0.0533766	-0.0569722	-0.0608683	-0.0650572	-0.0695111	-0.0741828	-0.0789849	-0.0838101	-0.0885111	-0.0929271	-0.0968763	-0.100178	-0.102674	-0.104224	-0.104755	-0.104225	-0.102673	-0.100178	-0.0968754	-0.0929271	-0.088511	-0.0838103	-0.078986	-0.074183
8	-0.0154924	-0.016108	-0.0167584	-0.0174463	-0.0181747	-0.0189464	-0.0197651	-0.0206348	-0.0215605	-0.0225472	-0.0236013	-0.0247294	-0.0259399	-0.0272423	-0.0286485	-0.030172	-0.0318293	-0.0336393	-0.0356253	-0.0378145	-0.0402385	-0.0429341	-0.0459417	-0.0493061	-0.0530726	-0.0572867	-0.0619848	-0.0671876	-0.0728971	-0.0790816	-0.0856785	-0.0925606	-0.0995671	-0.106469	-0.113015	-0.118913	-0.123875	-0.127643	-0.12999	-0.130795	-0.129991	-0.127642	-0.123876	-0.118913	-0.113015	-0.106469	-0.0995672	-0.0925621	-0.0856789
9	-0.0152165	-0.0158169	-0.0164515	-0.0171236	-0.0178362	-0.0185925	-0.0193968	-0.0202537	-0.0211685	-0.0221471	-0.0231969	-0.0243265	-0.0255464	-0.0268687	-0.0283082	-0.0298824	-0.0316125	-0.0335237	-0.0356469	-0.0380185	-0.0406812	-0.0436846	-0.0470841	-0.0509414	-0.0553196	-0.0602822	-0.0658825	-0.072155	-0.0791102	-0.0867124	-0.094886	-0.103471	-0.112265	-0.12097	-0.12926	-0.136756	-0.143078	-0.147888	-0.150888	-0.151917	-0.150888	-0.147887	-0.143079	-0.136755	-0.129261	-0.12097	-0.112265	-0.103473	-0.0948861
10	-0.0149082	-0.0154911	-0.0161075	-0.0167607	-0.017454	-0.0181908	-0.0189759	-0.0198144	-0.0207119	-0.0216748	-0.0227113	-0.0238312	-0.0250469	-0.026373	-0.0278265	-0.0294266	-0.0311985	-0.0331721	-0.035384	-0.037877	-0.0407015	-0.0439164	-0.0475875	-0.0517882	-0.0565935	-0.0620793	-0.0683102	-0.0753302	-0.0831549	-0.0917451	-0.101015	-0.110783	-0.120816	-0.13077	-0.140266	-0.148865	-0.156126	-0.161655	-0.165105	-0.166289	-0.165105	-0.161653	-0.156127	-0.148864	-0.140267	-0.13077	-0.120815	-0.110784	-0.101015
11	-0.0145689	-0.0151319	-0.015727	-0.0163577	-0.0170279	-0.0177414	-0.0185024	-0.0193158	-0.0201879	-0.0211263	-0.0221399	-0.0232384	-0.0244352	-0.0257459	-0.0271891	-0.0287858	-0.0305631	-0.0325535	-0.0347966	-0.0373384	-0.0402336	-0.0435457	-0.0473452	-0.0517113	-0.056724	-0.0624645	-0.0690017	-0.0763831	-0.0846256	-0.093687	-0.103476	-0.113798	-0.124407	-0.134938	-0.144988	-0.15409	-0.161777	-0.167631	-0.171284	-0.172538	-0.171285	-0.16763	-0.161778	-0.154089	-0.144988	-0.134938	-0.124407	-0.113799	-0.103475
12	-0.0141996	-0.0147402	-0.0153108	-0.0159156	-0.0165587	-0.0172444	-0.0179761	-0.0187578	-0.0195968	-0.0205016	-0.0214813	-0.0225455	-0.0237073	-0.0249822	-0.0263893	-0.0279508	-0.0296945	-0.0316527	-0.0338653	-0.0363786	-0.0392474	-0.042535	-0.0463113	-0.0506542	-0.0556424	-0.0613544	-0.0678567	-0.075194	-0.0833802	-0.0923709	-0.102073	-0.112293	-0.122784	-0.133188	-0.143109	-0.152087	-0.159664	-0.165432	-0.16903	-0.170265	-0.169031	-0.165431	-0.159665	-0.152086	-0.143109	-0.133188	-0.122784	-0.112294	-0.102071
13	-0.0138016	-0.0143164	-0.0148598	-0.0154358	-0.016048	-0.0167003	-0.0173966	-0.0181412	-0.0189408	-0.0198029	-0.0207366	-0.0217519	-0.0228613	-0.0240797	-0.0254256	-0.0269203	-0.0285904	-0.0304667	-0.0325866	-0.034994	-0.0377397	-0.0408821	-0.0444851	-0.0486196	-0.0533561	-0.0587637	-0.0648998	-0.0718009	-0.0794745	-0.087874	-0.0969083	-0.106397	-0.11611	-0.125718	-0.13486	-0.143118	-0.150077	-0.155369	-0.158667	-0.159799	-0.158668	-0.155367	-0.150078	-0.143117	-0.13486	-0.125718	-0.11611	-0.106398	-0.0969074
14	-0.0133762	-0.0138625	-0.0143761	-0.0149201	-0.0154976	-0.0161118	-0.016767	-0.0174683	-0.0182212	-0.0190319	-0.0199086	-0.0208613	-0.0219019	-0.023044	-0.0243044	-0.0257022	-0.0272612	-0.0290088	-0.0309784	-0.0332081	-0.035742	-0.0386294	-0.0419241	-0.0456847	-0.0499682	-0.0548291	-0.0603106	-0.0664364	-0.0732057	-0.0805704	-0.0884459	-0.0966729	-0.105053	-0.113307	-0.12113	-0.128174	-0.134095	-0.138587	-0.141385	-0.142344	-0.141385	-0.138587	-0.134096	-0.128173	-0.12113	-0.113307	-0.105053	-0.0966742	-0.0884457
15	-0.0129251	-0.0133814	-0.0138622	-0.0143705	-0.0149096	-0.0154825	-0.0160924	-0.0167427	-0.0174395	-0.01819	-0.0190013	-0.0198805	-0.0208379	-0.0218854	-0.0230378	-0.0243112	-0.0257256	-0.0273037	-0.0290726	-0.0310631	-0.0333094	-0.0358499	-0.0387247	-0.0419768	-0.0456463	-0.0497693	-0.0543718	-0.0594627	-0.0650314	-0.0710308	-0.0773862	-0.0839674	-0.090616	-0.0971175	-0.103239	-0.108722	-0.113311	-0.116781	-0.118937	-0.119675	-0.118938	-0.11678	-0.113311	-0.108722	-0.10324	-0.0971174	-0.0906159	-0.0839682	-0.0773868
16	-0.0124511	-0.0128753	-0.013321	-0.0137912	-0.0142887	-0.0148164	-0.0153767	-0.015972	-0.0166075	-0.0172896	-0.0180246	-0.0188191	-0.0196808	-0.0206185	-0.0216435	-0.0227696	-0.0240119	-0.0253875	-0.0269157	-0.0286186	-0.0305197	-0.0326443	-0.0350177	-0.0376653	-0.0406088	-0.0438647	-0.0474409	-0.0513315	-0.0555168	-0.0599521	-0.0645757	-0.0692912	-0.0739866	-0.0785189	-0.0827366	-0.0864773	-0.0895819	-0.0919152	-0.0933592	-0.0938519	-0.0933594	-0.0919148	-0.0895823	-0.0864768	-0.0827369	-0.0785188	-0.0739865	-0.0692915	-0.0645763
17	-0.0119573	-0.0123456	-0.0127554	-0.0131869	-0.0136405	-0.0141173	-0.0146234	-0.0151652	-0.0157411	-0.016347	-0.0169915	-0.0176886	-0.0184441	-0.01926	-0.0201433	-0.0211046	-0.0221543	-0.023303	-0.0245625	-0.0259452	-0.0274636	-0.0291296	-0.0309535	-0.0329435	-0.0351031	-0.0374301	-0.0399158	-0.042542	-0.0452822	-0.0480949	-0.0509323	-0.0537356	-0.0564413	-0.0589782	-0.0612745	-0.0632627	-0.0648795	-0.0660751	-0.0668076	-0.0670555	-0.0668076	-0.066075	-0.0648797	-0.0632626	-0.0612746	-0.0589781	-0.0564416	-0.0537357	-0.0509318
18	-0.0114457	-0.0117964	-0.0121686	-0.0125598	-0.0129672	-0.0133902	-0.0138388	-0.0143242	-0.0148369	-0.0153623	-0.0159106	-0.0165031	-0.0171444	-0.0178298	-0.0185617	-0.0193468	-0.0201908	-0.0210981	-0.0220728	-0.0231183	-0.0242362	-0.0254261	-0.0266842	-0.0280031	-0.0293704	-0.0307674	-0.0321719	-0.0335568	-0.0348917	-0.03614	-0.0372691	-0.0382571	-0.0390875	-0.0397549	-0.0402606	-0.0406226	-0.0408635	-0.0410099	-0.0410871	-0.0411099	-0.041087	-0.04101	-0.0408634	-0.0406227	-0.0402605	-0.0397549	-0.0390883	-0.0382573	-0.0372672
19	-0.0109177	-0.0112324	-0.0115642	-0.0119107	-0.0122697	-0.0126405	-0.0130305	-0.0134479	-0.0138849	-0.0143297	-0.0147891	-0.0152783	-0.0157998	-0.0163488	-0.0169245	-0.0175286	-0.0181616	-0.0188226	-0.0195087	-0.0202151	-0.020934	-0.0216541	-0.02236	-0.0230312	-0.0236428	-0.0241639	-0.0245623	-0.0248052	-0.0248611	-0.0247027	-0.024314	-0.0237049	-0.022899	-0.0219475	-0.0209136	-0.0198857	-0.0189561	-0.018213	-0.017736	-0.0175688	-0.0177359	-0.0182134	-0.0189558	-0.019886	-0.0209134	-0.0219474	-0.0228998	-0.0237047	-0.024312
20	-0.010377	-0.0106566	-0.0109461	-0.0112454	-0.0115547	-0.0118741	-0.0122047	-0.0125478	-0.0129022	-0.0132663	-0.0136411	-0.0140287	-0.0144287	-0.0148392	-0.0152578	-0.0156811	-0.0161048	-0.0165231	-0.0169272	-0.0173055	-0.0176424	-0.0179181	-0.0181081	-0.0181824	-0.0181072	-0.0178438	-0.0173546	-0.0166038	-0.0155623	-0.0142147	-0.0125615	-0.010639	-0.00850248	-0.00624779	-0.00398648	-0.00185916	-9.81703e-06	0.00142872	0.00233772	0.00265277	0.00233796	0.00142823	-9.41675e-06	-0.00185964	-0.00398623	-0.00624774	-0.0085029	-0.0106385	-0.0125606
21	-0.00982813	-0.0100708	-0.0103184	-0.0105717	-0.0108311	-0.0110969	-0.0113673	-0.0116404	-0.0119171	-0.0121989	-0.0124838	-0.0127679	-0.0130485	-0.0133232	-0.0135873	-0.0138346	-0.0140568	-0.0142437	-0.0143817	-0.014454	-0.0144392	-0.0143114	-0.0140401	-0.0135892	-0.0129199	-0.0119903	-0.010761	-0.00919732	-0.00727523	-0.00499102	-0.00236058	0.000559378	0.00368929	0.00690203	0.0100531	0.0129679	0.0154696	0.0173976	0.0186092	0.0190274	0.0186095	0.0173971	0.0154701	0.0129674	0.0100534	0.00690206	0.003689	0.000559903	-0.00236031
22	-0.00927424	-0.00947837	-0.00968495	-0.00989351	-0.0101036	-0.0103145	-0.0105248	-0.0107329	-0.0109373	-0.0111367	-0.0113287	-0.0115098	-0.0116752	-0.0118196	-0.0119359	-0.0120162	-0.0120494	-0.0120217	-0.011916	-0.0117117	-0.0113838	-0.0109027	-0.0102346	-0.00934075	-0.00818092	-0.0067133	-0.00490025	-0.00271169	-0.000130311	0.00283676	0.00616109	0.00977047	0.0135687	0.0174099	0.0211311	0.0245401	0.027444	0.0296695	0.0310634	0.0315433	0.0310637	0.0296689	0.0274445	0.0245396	0.0211314	0.0174099	0.0135685	0.00977107	0.00616109
23	-0.00871781	-0.00888354	-0.00904919	-0.00921343	-0.00937493	-0.00953233	-0.00968398	-0.00982803	-0.00996171	-0.0100819	-0.0101851	-0.0102677	-0.0103236	-0.0103455	-0.0103245	-0.0102507	-0.010111	-0.00988977	-0.00956758	-0.00912152	-0.00852469	-0.007746	-0.00675095	-0.005501	-0.00395724	-0.00208069	0.000161925	0.00279394	0.00582489	0.00923837	0.0129963	0.0170163	0.0211925	0.0253713	0.029383	0.0330318	0.0361223	0.0384807	0.039954	0.0404603	0.0399543	0.0384801	0.0361228	0.0330313	0.0293833	0.0253713	0.0211927	0.0170174	0.0129962
24	-0.00816098	-0.00828964	-0.00841512	-0.00853576	-0.00864988	-0.0087557	-0.00885075	-0.0089323	-0.00899725	-0.00904221	-0.0090626	-0.00905312	-0.00900683	-0.00891572	-0.00876964	-0.00855686	-0.00826308	-0.00787177	-0.00736259	-0.00671162	-0.00589162	-0.00487186	-0.0036191	-0.00209719	-0.000270616	0.00189478	0.00442634	0.00733969	0.0106366	0.0142928	0.0182632	0.0224604	0.026775	0.0310541	0.0351308	0.038816	0.0419218	0.0442832	0.045755	0.0462599	0.0457553	0.0442827	0.0419223	0.0388155	0.0351311	0.0310541	0.0267754	0.0224617	0.0182628
25	-0.00760598	-0.00769971	-0.0077868	-0.00786541	-0.00793375	-0.00798985	-0.00803078	-0.00805326	-0.00805364	-0.00802795	-0.00797093	-0.00787653	-0.00773706	-0.00754375	-0.0072857	-0.00695046	-0.00652311	-0.00598669	-0.00532087	-0.00450217	-0.00350436	-0.00229831	-0.000853394	0.000862717	0.00288073	0.00522872	0.00792742	0.0109851	0.0143965	0.0181311	0.022139	0.0263318	0.0306019	0.0348035	0.0387786	0.0423518	0.0453495	0.0476209	0.0490337	0.0495176	0.0490339	0.0476205	0.0453499	0.0423513	0.0387789	0.0348035	0.0306019	0.0263318	0.0221377
26	-0.0070564	-0.00711702	-0.00716745	-0.00720588	-0.0072305	-0.00723932	-0.00722926	-0.00719672	-0.00713728	-0.00704609	-0.00691771	-0.00674617	-0.00652325	-0.00623926	-0.00588303	-0.00544224	-0.00490201	-0.00424536	-0.00345268	-0.00250186	-0.00136865	-2.65669e-05	0.0015515	0.00339329	0.00552406	0.00796525	0.0107309	0.013823	0.01723	0.0209169	0.0248312	0.0288871	0.0329823	0.0369819	0.0407411	0.0441021	0.0469096	0.0490299	0.050346	0.050796	0.0503462	0.0490295	0.0469099	0.0441016	0.0407415	0.036982	0.0329816	0.0288857	0.0248294
27	-0.00651601	-0.00654469	-0.00655993	-0.00656007	-0.00654347	-0.00650823	-0.00645094	-0.00636754	-0.00625306	-0.00610215	-0.00590939	-0.00566907	-0.00537265	-0.00500993	-0.00456978	-0.00404032	-0.00340727	-0.00265437	-0.00176321	-0.000713367	0.000516842	0.00195041	0.00361041	0.00551981	0.00769842	0.0101612	0.0129161	0.0159593	0.019275	0.0228249	0.0265565	0.0303888	0.034227	0.0379491	0.0414254	0.0445173	0.0470893	0.0490255	0.0502249	0.0506345	0.0502251	0.0490251	0.0470896	0.0445169	0.0414257	0.0379491	0.0342266	0.0303879	0.0265553
28	-0.00598639	-0.00598475	-0.00596668	-0.0059308	-0.00587572	-0.00579973	-0.00569908	-0.00556921	-0.00540479	-0.00520023	-0.00495033	-0.00464977	-0.00428995	-0.00386036	-0.00335021	-0.00274837	-0.00204149	-0.00121431	-0.000250153	0.000869051	0.00216213	0.00364868	0.0053477	0.00727731	0.00945205	0.0118812	0.0145672	0.0175016	0.0206653	0.0240191	0.0275117	0.0310684	0.0346032	0.0380076	0.0411679	0.0439645	0.0462814	0.0480201	0.0490952	0.0494617	0.0490953	0.0480198	0.0462817	0.0439642	0.0411681	0.0380076	0.0346033	0.0310687	0.0275115
29	-0.00546854	-0.00543877	-0.00538986	-0.00532068	-0.0052301	-0.00511659	-0.00497635	-0.00480464	-0.00459577	-0.00434381	-0.00404399	-0.00369175	-0.00327856	-0.00279359	-0.00222666	-0.00156785	-0.000804763	7.69864e-05	0.00109191	0.00225463	0.00358102	0.00508826	0.00679176	0.00870461	0.0108364	0.0131916	0.0157685	0.018555	0.0215296	0.0246539	0.0278791	0.0311371	0.0343509	0.037426	0.040264	0.0427634	0.0448257	0.0463687	0.047321	0.0476452	0.0473211	0.0463685	0.044826	0.0427631	0.0402642	0.037426	0.0343511	0.0311376	0.0278793
30	-0.00496457	-0.00490811	-0.0048308	-0.00473144	-0.0046088	-0.00446132	-0.00428533	-0.0040763	-0.00382843	-0.00353564	-0.00319341	-0.00279762	-0.00234007	-0.00181031	-0.00119895	-0.000497178	0.000306305	0.00122473	0.00227037	0.00345462	0.0047905	0.00629274	0.00797344	0.00984122	0.0119014	0.0141545	0.0165955	0.01921	0.0219755	0.0248549	0.0278026	0.0307576	0.0336516	0.0364035	0.0389291	0.041143	0.0429629	0.0443204	0.0451568	0.0454411	0.0451568	0.0443203	0.0429631	0.0411428	0.0389292	0.0364034	0.0336517	0.0307577	0.0278026
31	-0.00447681	-0.00439425	-0.00429078	-0.00416454	-0.00401369	-0.00383614	-0.00362841	-0.00338636	-0.00310472	-0.00277782	-0.00240081	-0.00196899	-0.00147503	-0.000910087	-0.000265669	0.00046659	0.00129664	0.00223565	0.00329407	0.00448167	0.00580888	0.00728681	0.00892412	0.0107264	0.0126955	0.0148288	0.0171184	0.0195494	0.0220992	0.0247325	0.0274071	0.0300687	0.0326578	0.0351051	0.0373393	0.0392891	0.040886	0.0420739	0.0428044	0.0430524	0.0428045	0.0420737	0.0408861	0.0392889	0.0373394	0.035105	0.0326578	0.0300685	0.0274064
32	-0.00400626	-0.00389959	-0.00377223	-0.00362183	-0.00344599	-0.00324217	-0.00300688	-0.00273617	-0.00242552	-0.00207013	-0.00166482	-0.00120413	-0.000681731	-9.07201e-05	0.000576534	0.00132818	0.00217274	0.00311903	0.0041759	0.00535217	0.00665597	0.0080946	0.00967358	0.0113962	0.013262	0.0152656	0.0173974	0.0196422	0.0219782	0.0243723	0.0267859	0.0291715	0.0314772	0.0336444	0.035613	0.0373238	0.0387201	0.039756	0.040392	0.0406077	0.040392	0.0397559	0.0387202	0.0373237	0.0356131	0.0336443	0.0314773	0.0291713	0.0267849
33	-0.0035536	-0.00342633	-0.0032775	-0.00310497	-0.00290663	-0.00268009	-0.00242148	-0.00212648	-0.00179119	-0.00141174	-0.000983302	-0.000500535	4.21711e-05	0.00065065	0.00133177	0.00209307	0.0029418	0.00388495	0.00492965	0.00608316	0.00735154	0.00873953	0.0102502	0.0118847	0.0136407	0.0155113	0.0174861	0.019549	0.0216791	0.0238465	0.0260168	0.0281483	0.0301962	0.0321108	0.0338418	0.0353401	0.036559	0.037461	0.038014	0.0382012	0.038014	0.0374609	0.0365591	0.03534	0.0338418	0.0321107	0.0301962	0.0281482	0.0260159
34	-0.00311964	-0.0029746	-0.00280668	-0.00261435	-0.00239609	-0.00214998	-0.00187181	-0.00155675	-0.0012013	-0.000802363	-0.000355873	0.000142779	0.000698704	0.00131736	0.00200483	0.00276765	0.00361189	0.00454327	0.00556726	0.00668912	0.0079131	0.00924237	0.0106783	0.0122198	0.0138632	0.0156012	0.0174228	0.0193115	0.0212471	0.0232032	0.0251497	0.0270502	0.0288662	0.0305557	0.0320764	0.0333877	0.0344513	0.0352365	0.0357172	0.0358798	0.0357172	0.0352365	0.0344514	0.0333876	0.0320764	0.0305556	0.0288663	0.0270502	0.0251492
35	-0.0027052	-0.00254387	-0.00235924	-0.00214996	-0.00191473	-0.00165179	-0.0013571	-0.001026	-0.000655202	-0.0002419	0.000217336	0.000726342	0.0012898	0.00191287	0.00260073	0.00335856	0.00419133	0.00510382	0.00610014	0.00718379	0.0083575	0.00962313	0.0109807	0.0124276	0.0139593	0.0155676	0.0172417	0.0189658	0.0207212	0.0224835	0.0242262	0.0259187	0.0275286	0.0290196	0.0303557	0.0315037	0.0324323	0.0331163	0.0335345	0.0336758	0.0335345	0.0331163	0.0324323	0.0315036	0.0303558	0.0290196	0.0275289	0.0259189	0.024226
36	-0.00231114	-0.00213363	-0.00193462	-0.00171181	-0.00146288	-0.00118545	-0.000876612	-0.000533272	-0.000152235	0.000269763	0.000736195	0.00125069	0.00181738	0.00244065	0.00312446	0.00387244	0.00468844	0.00557641	0.00653969	0.00758092	0.00870158	0.00990182	0.0111804	0.0125344	0.0139583	0.0154426	0.0169768	0.0185482	0.0201402	0.0217285	0.0232882	0.0247955	0.0262246	0.027543	0.0287189	0.0297252	0.0305372	0.0311343	0.0314989	0.0316219	0.0314989	0.0311343	0.0305373	0.029725	0.0287188	0.0275433	0.0262255	0.0247962	0.0232875
Y-component of velocity field (v_y) for H10 2-Gaussian Brinkman flow
Y↓ & X→	-33	-32	-31	-30	-29	-28	-27	-26	-25	-24	-23	-22	-21	-20	-19	-18	-17	-16	-15	-14	-13	-12	-11	-10	-9	-8	-7	-6	-5	-4	-3	-2	-1	0	1	2	3	4	5	6	7	8	9	10	11	12	13	14	15
-37	-0.0107594	-0.0111299	-0.0115119	-0.0119048	-0.0123083	-0.0127218	-0.0131446	-0.0135757	-0.0140137	-0.014457	-0.0149035	-0.0153506	-0.0157953	-0.016234	-0.0166622	-0.0170746	-0.0174653	-0.0178278	-0.0181543	-0.0184353	-0.0186611	-0.0188207	-0.0189027	-0.0188944	-0.0187829	-0.018555	-0.0181981	-0.0176998	-0.0170496	-0.0162389	-0.0152614	-0.014115	-0.0128006	-0.0113249	-0.00969773	-0.00793578	-0.00605849	-0.00409122	-0.00206145	1.52968e-08	0.00206142	0.00409123	0.00605849	0.00793576	0.00969776	0.0113248	0.0128006	0.0141149	0.0152614
-36	-0.0109325	-0.0113237	-0.0117283	-0.0121461	-0.0125769	-0.0130202	-0.0134754	-0.0139419	-0.0144183	-0.0149033	-0.0153949	-0.0158908	-0.0163879	-0.0168828	-0.0173709	-0.0178471	-0.018305	-0.0187373	-0.0191357	-0.0194903	-0.0197904	-0.0200235	-0.0201764	-0.0202344	-0.0201825	-0.0200047	-0.0196852	-0.0192094	-0.0185637	-0.0177363	-0.0167182	-0.0155054	-0.0140974	-0.0125013	-0.0107275	-0.00879404	-0.00672257	-0.00454361	-0.00229056	3.67248e-08	0.00229066	0.00454359	0.00672176	0.00879269	0.0107267	0.0125012	0.0140976	0.0155053	0.016718
-35	-0.0110922	-0.0115041	-0.0119316	-0.0123745	-0.0128329	-0.0133065	-0.013795	-0.0142979	-0.0148141	-0.0153426	-0.0158817	-0.0164292	-0.0169822	-0.0175375	-0.0180905	-0.0186362	-0.0191679	-0.019678	-0.0201575	-0.020596	-0.0209816	-0.0213003	-0.0215371	-0.0216752	-0.0216968	-0.0215827	-0.0213142	-0.0208726	-0.0202408	-0.0194034	-0.018348	-0.017068	-0.0155609	-0.0138334	-0.0118963	-0.00976995	-0.00747946	-0.00506061	-0.00255284	4.27879e-08	0.00255292	0.00506059	0.00747867	0.00976863	0.0118955	0.0138333	0.0155612	0.0170679	0.0183479
-34	-0.0112364	-0.011669	-0.0121193	-0.0125873	-0.0130734	-0.0135776	-0.0140999	-0.0146399	-0.0151971	-0.0157706	-0.0163591	-0.0169606	-0.0175727	-0.0181923	-0.018815	-0.0194357	-0.020048	-0.0206439	-0.021214	-0.0217472	-0.0222303	-0.0226482	-0.0229836	-0.0232174	-0.0233289	-0.0232953	-0.023094	-0.0227018	-0.0220968	-0.0212594	-0.0201727	-0.0188269	-0.0172164	-0.0153466	-0.0132286	-0.0108856	-0.00834697	-0.0056545	-0.00285455	4.21111e-08	0.00285456	0.00565451	0.0083466	0.010885	0.0132282	0.0153465	0.0172166	0.018827	0.020173
-33	-0.0113636	-0.0118164	-0.0122891	-0.0127819	-0.0132955	-0.0138303	-0.0143865	-0.0149642	-0.015563	-0.0161827	-0.0168221	-0.0174799	-0.0181538	-0.0188412	-0.019538	-0.0202395	-0.0209391	-0.021629	-0.0222995	-0.0229386	-0.0235323	-0.024064	-0.0245144	-0.0248618	-0.025082	-0.0251484	-0.0250338	-0.0247094	-0.0241478	-0.0233235	-0.0222146	-0.0208062	-0.019089	-0.0170664	-0.0147489	-0.0121631	-0.00934292	-0.00633759	-0.00320196	4.3319e-08	0.00320188	0.00633763	0.00934294	0.012163	0.0147489	0.0170663	0.0190893	0.0208064	0.022215
-32	-0.0114717	-0.0119441	-0.0124385	-0.0129556	-0.0134963	-0.0140613	-0.0146513	-0.0152666	-0.0159076	-0.0165741	-0.0172656	-0.0179813	-0.0187195	-0.0194779	-0.0202531	-0.0210406	-0.0218342	-0.0226263	-0.023407	-0.0241638	-0.024882	-0.0255433	-0.0261267	-0.0266073	-0.0269577	-0.0271466	-0.0271413	-0.0269067	-0.0264087	-0.0256146	-0.0244956	-0.0230304	-0.0212046	-0.0190188	-0.0164824	-0.0136251	-0.0104858	-0.00712276	-0.00360166	5.28812e-08	0.00360156	0.00712281	0.0104858	0.0136251	0.0164825	0.0190186	0.0212048	0.0230304	0.0244957
-31	-0.0115588	-0.0120497	-0.0125649	-0.0131054	-0.0136724	-0.014267	-0.0148902	-0.0155429	-0.0162257	-0.0169392	-0.0176834	-0.0184581	-0.0192622	-0.0200943	-0.0209513	-0.0218296	-0.0227234	-0.0236255	-0.0245259	-0.0254123	-0.026269	-0.0270767	-0.0278123	-0.028448	-0.0289524	-0.0292893	-0.0294197	-0.0293012	-0.0288916	-0.0281493	-0.0270365	-0.025524	-0.0235903	-0.021232	-0.0184565	-0.0152964	-0.0117961	-0.00802485	-0.00406145	6.99341e-08	0.00406133	0.00802492	0.0117961	0.0152963	0.0184566	0.0212317	0.0235905	0.0255238	0.0270364
-30	-0.0116226	-0.0121309	-0.0126657	-0.0132285	-0.0138207	-0.0144438	-0.0150991	-0.0157882	-0.0165121	-0.0172721	-0.0180689	-0.018903	-0.019774	-0.0206814	-0.021623	-0.0225959	-0.0235952	-0.0246143	-0.0256437	-0.0266712	-0.0276806	-0.0286518	-0.0295598	-0.0303738	-0.0310586	-0.031572	-0.0318684	-0.0318967	-0.0316051	-0.030941	-0.0298556	-0.0283094	-0.0262717	-0.0237332	-0.0206981	-0.0172018	-0.0132946	-0.00905885	-0.0045892	9.29992e-08	0.00458904	0.00905893	0.0132945	0.0172016	0.0206982	0.0237329	0.0262719	0.0283091	0.0298557
-29	-0.0116611	-0.0121854	-0.0127384	-0.0133219	-0.0139378	-0.0145877	-0.0152737	-0.0159976	-0.0167614	-0.0175667	-0.0184151	-0.0193079	-0.0202458	-0.021229	-0.0222566	-0.0233268	-0.0244357	-0.0255776	-0.026744	-0.0279231	-0.0290988	-0.0302502	-0.031351	-0.0323675	-0.0332604	-0.0339816	-0.0344777	-0.0346878	-0.0345485	-0.0339944	-0.0329633	-0.0314023	-0.0292686	-0.0265451	-0.0232307	-0.0193635	-0.0150003	-0.0102388	-0.00519229	1.23563e-07	0.00519208	0.0102389	0.0150003	0.0193633	0.0232309	0.0265447	0.0292689	0.0314019	0.0329636
-28	-0.0116723	-0.012211	-0.0127805	-0.0133828	-0.0140203	-0.0146951	-0.0154096	-0.0161663	-0.0169678	-0.0178163	-0.0187145	-0.0196644	-0.0206679	-0.0217263	-0.02284	-0.0240086	-0.0252295	-0.0264985	-0.0278081	-0.0291478	-0.0305019	-0.0318494	-0.0331628	-0.0344061	-0.0355357	-0.0364976	-0.03723	-0.0376605	-0.0377128	-0.0373059	-0.0363614	-0.0348098	-0.0325931	-0.0296834	-0.0260721	-0.0217995	-0.0169289	-0.0115762	-0.00587686	1.63416e-07	0.00587661	0.0115763	0.016929	0.0217993	0.0260724	0.0296829	0.0325935	0.0348093	0.0363617
-27	-0.0116545	-0.0122057	-0.0127894	-0.0134084	-0.0140651	-0.0147622	-0.0155026	-0.0162893	-0.0171254	-0.0180143	-0.0189593	-0.0199634	-0.0210298	-0.0221612	-0.0233593	-0.0246253	-0.0259584	-0.0273562	-0.028813	-0.0303196	-0.0318616	-0.0334185	-0.0349622	-0.0364548	-0.0378491	-0.0390843	-0.0400902	-0.040782	-0.041069	-0.0408515	-0.0400316	-0.0385195	-0.0362387	-0.0331467	-0.0292249	-0.0245147	-0.0190863	-0.013076	-0.00664575	2.13543e-07	0.00664542	0.0130762	0.0190863	0.0245144	0.0292253	0.033146	0.0362392	0.038519	0.0400319
-26	-0.0116061	-0.0121673	-0.0127629	-0.0133958	-0.014069	-0.0147853	-0.0155483	-0.0163615	-0.0172287	-0.018154	-0.0191416	-0.0201959	-0.021321	-0.0225212	-0.0237999	-0.0251601	-0.0266031	-0.0281286	-0.0297331	-0.0314096	-0.0331455	-0.0349216	-0.0367098	-0.0384715	-0.0401559	-0.0416954	-0.0430109	-0.0440055	-0.0445726	-0.0445903	-0.0439376	-0.0425007	-0.0401803	-0.036916	-0.0326758	-0.0275005	-0.0214672	-0.0147356	-0.00749787	2.74271e-07	0.00749746	0.0147359	0.0214672	0.0275	0.0326762	0.0369152	0.040181	0.0425001	0.0439377
-25	-0.0115254	-0.0120942	-0.0126989	-0.0133428	-0.0140291	-0.0147612	-0.0155429	-0.0163783	-0.0172721	-0.0182288	-0.0192538	-0.0203525	-0.0215305	-0.0227933	-0.0241464	-0.0255947	-0.0271419	-0.0287902	-0.0305387	-0.0323834	-0.034314	-0.0363134	-0.0383547	-0.040399	-0.0423928	-0.0442629	-0.0459212	-0.0472573	-0.0481473	-0.0484452	-0.0480043	-0.0466823	-0.0443531	-0.0409339	-0.0363755	-0.0307171	-0.0240417	-0.0165352	-0.00842329	3.44554e-07	0.00842276	0.0165354	0.0240417	0.0307165	0.0363761	0.0409329	0.044354	0.0466816	0.0480043
-24	-0.0114109	-0.0119846	-0.0125955	-0.0132471	-0.013943	-0.0146867	-0.0154827	-0.0163355	-0.0172504	-0.0182326	-0.0192884	-0.0204244	-0.0216474	-0.0229647	-0.0243834	-0.0259107	-0.0275528	-0.0293148	-0.0311988	-0.0332042	-0.0353238	-0.0375437	-0.0398391	-0.0421713	-0.0444858	-0.046705	-0.0487324	-0.0504424	-0.0516926	-0.0523122	-0.052127	-0.0509622	-0.0486599	-0.0451107	-0.0402451	-0.0340981	-0.0267583	-0.0184394	-0.00940423	4.24614e-07	0.00940354	0.0184398	0.0267586	0.0340977	0.0402461	0.0451095	0.0486608	0.0509613	0.0521273
-23	-0.0112616	-0.0118373	-0.0124512	-0.0131069	-0.0138083	-0.0145593	-0.0153646	-0.0162292	-0.0171589	-0.0181597	-0.0192386	-0.0204033	-0.0216618	-0.023023	-0.0244958	-0.0260896	-0.0278131	-0.0296746	-0.0316797	-0.0338313	-0.0361262	-0.0385543	-0.0410937	-0.0437077	-0.0463414	-0.0489141	-0.0513222	-0.0534253	-0.055062	-0.0560361	-0.0561444	-0.0551763	-0.0529392	-0.0492935	-0.0441455	-0.0375244	-0.0295225	-0.0203827	-0.0104069	5.18373e-07	0.0104061	0.0203831	0.0295229	0.037524	0.0441468	0.0492921	0.0529402	0.0551753	0.0561449
-22	-0.0110768	-0.0116514	-0.0122647	-0.0129208	-0.0136234	-0.0143768	-0.0151859	-0.0160562	-0.0169937	-0.0180053	-0.0190985	-0.0202818	-0.0215645	-0.0229567	-0.0244693	-0.0261136	-0.0279011	-0.0298428	-0.0319481	-0.0342238	-0.0366711	-0.0392843	-0.0420454	-0.0449209	-0.0478569	-0.0507707	-0.0535527	-0.0560499	-0.0580835	-0.0594313	-0.0598598	-0.0591219	-0.0569884	-0.053287	-0.0478975	-0.0408402	-0.0322096	-0.0222778	-0.0113866	6.25455e-07	0.0113856	0.0222782	0.0322099	0.0408394	0.0478988	0.0532853	0.0569896	0.0591208	0.0598604
-21	-0.0108558	-0.0114262	-0.0120355	-0.0126878	-0.0133872	-0.0141378	-0.014945	-0.0158142	-0.0167521	-0.0177657	-0.0188634	-0.020054	-0.021348	-0.0227565	-0.0242919	-0.0259674	-0.0277968	-0.0297941	-0.031972	-0.0343414	-0.0369079	-0.0396706	-0.0426162	-0.0457152	-0.0489161	-0.0521359	-0.0552608	-0.0581277	-0.0605429	-0.0622596	-0.0630157	-0.0625283	-0.0605322	-0.0568218	-0.051249	-0.043824	-0.034641	-0.0239992	-0.0122785	7.34305e-07	0.0122774	0.0239997	0.0346411	0.0438226	0.0512503	0.0568198	0.0605336	0.0625271	0.0630163
-20	-0.0105986	-0.0111615	-0.011763	-0.0124075	-0.0130989	-0.0138415	-0.0146406	-0.0155019	-0.0164322	-0.0174387	-0.01853	-0.0197156	-0.0210065	-0.0224146	-0.0239535	-0.0256379	-0.0274834	-0.0295065	-0.0317229	-0.0341473	-0.0367894	-0.0396533	-0.0427305	-0.0459965	-0.0494032	-0.0528691	-0.0562787	-0.059462	-0.0622135	-0.064266	-0.0653327	-0.0650986	-0.0632658	-0.059597	-0.0539173	-0.0462254	-0.0366137	-0.025404	-0.0130087	8.334e-07	0.0130074	0.0254046	0.0366139	0.0462238	0.0539187	0.0595948	0.0632673	0.0650973	0.0653332
-19	-0.0103054	-0.0108574	-0.0114476	-0.01208	-0.0127587	-0.0134879	-0.0142728	-0.0151191	-0.0160335	-0.0170233	-0.0180972	-0.0192648	-0.0205373	-0.0219271	-0.0234485	-0.0251168	-0.0269493	-0.028964	-0.0311789	-0.0336119	-0.0362761	-0.0391802	-0.0423203	-0.045677	-0.0492068	-0.0528313	-0.0564359	-0.0598478	-0.0628544	-0.0651744	-0.0665033	-0.066501	-0.0648436	-0.0612675	-0.0555746	-0.0477525	-0.0378896	-0.0263233	-0.0134897	9.14619e-07	0.0134883	0.0263239	0.0378898	0.0477509	0.0555763	0.0612651	0.0648453	0.0664997	0.0665038
-18	-0.00997652	-0.0105145	-0.0110897	-0.011706	-0.0123673	-0.0130777	-0.0138422	-0.0146664	-0.0155566	-0.0165201	-0.0175653	-0.0187015	-0.0199399	-0.0212927	-0.0227742	-0.0244001	-0.0261879	-0.0281566	-0.0303256	-0.0327144	-0.0353389	-0.0382111	-0.0413313	-0.0446847	-0.0482328	-0.0519023	-0.0555821	-0.0591013	-0.0622463	-0.0647305	-0.0662407	-0.0664228	-0.0649373	-0.0615029	-0.0559058	-0.048123	-0.0382375	-0.0265926	-0.0136361	9.68403e-07	0.0136346	0.0265933	0.0382377	0.0481213	0.0559075	0.0615004	0.064939	0.0664215	0.0662412
-17	-0.00961318	-0.010134	-0.0106906	-0.0112868	-0.0119262	-0.0126127	-0.0133509	-0.014146	-0.0150041	-0.0159319	-0.0169373	-0.018029	-0.0192177	-0.0205149	-0.0219341	-0.0234906	-0.0252013	-0.027085	-0.0291609	-0.031449	-0.0339666	-0.0367272	-0.039734	-0.0429764	-0.0464205	-0.0499993	-0.0536083	-0.0570832	-0.0602172	-0.0627283	-0.0643069	-0.0645991	-0.0632638	-0.0600145	-0.0546314	-0.0470844	-0.037449	-0.0260634	-0.0133705	9.81533e-07	0.013369	0.0260641	0.0374493	0.0470827	0.0546332	0.060012	0.0632654	0.0645978	0.0643074
-16	-0.00921644	-0.00971703	-0.0102518	-0.0108242	-0.0114374	-0.0120951	-0.0128014	-0.013561	-0.0143794	-0.0152627	-0.0162178	-0.0172527	-0.0183767	-0.0196003	-0.0209357	-0.0223964	-0.0239981	-0.0257577	-0.0276932	-0.0298232	-0.0321642	-0.0347298	-0.0375241	-0.0405393	-0.0437458	-0.0470835	-0.050457	-0.0537147	-0.0566634	-0.0590384	-0.0605472	-0.0608528	-0.0596296	-0.0566014	-0.0515549	-0.0444569	-0.035375	-0.0246285	-0.012637	9.44808e-07	0.0126356	0.0246291	0.0353753	0.0444553	0.0515567	0.056599	0.0596312	0.0608515	0.0605475
-15	-0.00878735	-0.00926532	-0.00977535	-0.0103205	-0.0109037	-0.0115281	-0.0121975	-0.0129158	-0.0136878	-0.0145186	-0.0154141	-0.016381	-0.017427	-0.0185609	-0.0197928	-0.0211339	-0.0225972	-0.0241967	-0.0259474	-0.0278649	-0.0299629	-0.0322527	-0.0347377	-0.0374106	-0.0402455	-0.0431896	-0.0461587	-0.0490187	-0.0515987	-0.0536628	-0.0549503	-0.0551594	-0.0539981	-0.0512176	-0.0466253	-0.0401899	-0.0319709	-0.0222545	-0.0114177	8.57196e-07	0.0114164	0.022255	0.031971	0.0401883	0.0466268	0.0512154	0.0539995	0.0551584	0.0549507
-14	-0.00832774	-0.00878092	-0.00926359	-0.00977844	-0.0103282	-0.0109155	-0.0115436	-0.0122157	-0.0129354	-0.013707	-0.0145349	-0.0154243	-0.0163811	-0.0174116	-0.0185233	-0.0197243	-0.0210239	-0.0224321	-0.0239593	-0.0256162	-0.0274119	-0.0293533	-0.0314406	-0.0336654	-0.0360041	-0.0384109	-0.040815	-0.0431045	-0.0451375	-0.0467191	-0.0476341	-0.0476339	-0.0464781	-0.0439628	-0.0399302	-0.0343565	-0.0272929	-0.0189796	-0.00973197	7.1811e-07	0.00973095	0.01898	0.0272928	0.0343547	0.0399311	0.0439609	0.0464796	0.0476334	0.0476347
-13	-0.0078407	-0.00826651	-0.00871928	-0.00920124	-0.00971465	-0.0102618	-0.0108449	-0.0114666	-0.0121296	-0.0128366	-0.0135909	-0.0143957	-0.0152545	-0.0161714	-0.0171504	-0.018196	-0.0193129	-0.0205061	-0.0217803	-0.0231397	-0.0245872	-0.0261231	-0.0277427	-0.0294347	-0.0311763	-0.0329288	-0.0346355	-0.0362105	-0.0375466	-0.0384998	-0.0389122	-0.0386036	-0.0374007	-0.0351591	-0.0317689	-0.0272186	-0.0215523	-0.0149524	-0.00765651	5.26392e-07	0.00765579	0.0149527	0.0215521	0.0272171	0.0317694	0.0351578	0.0374019	0.0386034	0.0389129
-12	-0.00732872	-0.00772472	-0.00814534	-0.00859223	-0.00906705	-0.00957142	-0.010107	-0.0106754	-0.0112782	-0.0119171	-0.0125936	-0.013309	-0.0140645	-0.0148612	-0.0156997	-0.0165804	-0.0175029	-0.0184665	-0.0194692	-0.0205079	-0.0215777	-0.0226711	-0.023777	-0.0248793	-0.0259554	-0.0269728	-0.0278897	-0.0286482	-0.0291802	-0.0293993	-0.0292132	-0.0285213	-0.0272291	-0.0252627	-0.0225691	-0.019154	-0.0150551	-0.0103888	-0.00530287	2.9179e-07	0.00530246	0.010389	0.015055	0.0191533	0.0225695	0.0252619	0.0272297	0.0285211	0.0292135
-11	-0.00679318	-0.00715794	-0.00754489	-0.00795509	-0.00838961	-0.0088495	-0.00933567	-0.00984893	-0.0103898	-0.0109587	-0.0115553	-0.0121794	-0.0128295	-0.0135039	-0.0141996	-0.0149128	-0.0156378	-0.016368	-0.0170943	-0.0178058	-0.0184893	-0.0191287	-0.0197057	-0.0201987	-0.0205842	-0.0208357	-0.0209259	-0.0208261	-0.0205083	-0.0199466	-0.0191182	-0.0180072	-0.016603	-0.0149076	-0.0129299	-0.0106945	-0.0082337	-0.00559437	-0.00282922	4.13957e-08	0.00282914	0.0055944	0.00823373	0.0106945	0.01293	0.0149075	0.0166031	0.018007	0.0191183
-10	-0.00623599	-0.00656877	-0.00692106	-0.00729346	-0.00768658	-0.00810096	-0.00853684	-0.00899424	-0.00947267	-0.00997131	-0.0104885	-0.0110219	-0.0115681	-0.0121224	-0.0126784	-0.0132283	-0.0137615	-0.0142654	-0.0147242	-0.0151193	-0.0154294	-0.0156298	-0.015695	-0.0155978	-0.0153134	-0.0148209	-0.0141069	-0.0131704	-0.0120228	-0.0106974	-0.00923913	-0.00771544	-0.00619857	-0.00476545	-0.00348608	-0.00240449	-0.00154736	-0.00089389	-0.000403769	-2.00885e-07	0.000404056	0.000893777	0.00154731	0.00240492	0.00348575	0.00476591	0.00619827	0.0077155	0.00923913
-9	-0.00566009	-0.00596014	-0.00627703	-0.00661095	-0.00696213	-0.00733069	-0.00771624	-0.0081181	-0.00853491	-0.00896483	-0.00940482	-0.00985105	-0.0102979	-0.0107386	-0.0111635	-0.0115612	-0.0119168	-0.0122125	-0.0124265	-0.0125336	-0.0125049	-0.0123085	-0.0119121	-0.0112838	-0.0103979	-0.00923823	-0.00780396	-0.00611956	-0.00423162	-0.00222661	-0.000210893	0.00167332	0.00327938	0.00446284	0.00509876	0.00512613	0.00452326	0.00337218	0.00179707	-4.18157e-07	-0.00179645	-0.00337243	-0.00452343	-0.00512538	-0.00509955	-0.00446185	-0.00327999	-0.00167296	0.0002109
-8	-0.00506814	-0.00533482	-0.00561582	-0.005911	-0.00622023	-0.00654326	-0.00687919	-0.00722678	-0.00758395	-0.00794808	-0.00831502	-0.00867969	-0.00903488	-0.00937193	-0.00967892	-0.00994149	-0.0101413	-0.0102565	-0.0102608	-0.0101233	-0.00980984	-0.00928243	-0.00850402	-0.00743895	-0.00606123	-0.0043592	-0.00234281	-5.74188e-05	0.00242129	0.00496333	0.00741255	0.00956615	0.0112174	0.0121678	0.0122484	0.0113852	0.00956121	0.00690872	0.00362041	-5.94505e-07	-0.00361952	-0.00690907	-0.00956142	-0.0113841	-0.0122495	-0.0121663	-0.0112183	-0.0095656	-0.00741259
-7	-0.00446234	-0.00469534	-0.00494031	-0.00519684	-0.00546451	-0.00574278	-0.00603043	-0.00632584	-0.00662637	-0.00692872	-0.0072281	-0.00751872	-0.00779222	-0.00803854	-0.00824426	-0.00839344	-0.00846548	-0.00843581	-0.00827497	-0.00794889	-0.00741981	-0.0066463	-0.00558847	-0.00420889	-0.00248211	-0.000400466	0.00201776	0.00471168	0.00758468	0.0104762	0.0131955	0.0154979	0.0171356	0.0178736	0.0175138	0.0159743	0.0132427	0.00948684	0.00494776	-7.14758e-07	-0.0049467	-0.00948726	-0.0132429	-0.015973	-0.0175151	-0.0178719	-0.0171367	-0.0154972	-0.0131956
-6	-0.00384483	-0.00404409	-0.00425315	-0.00447138	-0.00469821	-0.00493289	-0.00517402	-0.0054198	-0.00566725	-0.00591271	-0.00615112	-0.0063764	-0.00657969	-0.00675025	-0.00687414	-0.00693491	-0.00691111	-0.0067771	-0.00650233	-0.0060517	-0.0053865	-0.00446436	-0.00324506	-0.00169151	0.000220141	0.00249422	0.00510687	0.00798804	0.0110296	0.0140553	0.0168572	0.0191706	0.0207281	0.0212785	0.0206112	0.0186425	0.0153641	0.010963	0.00570491	-7.70109e-07	-0.00570376	-0.0109634	-0.0153644	-0.0186411	-0.0206127	-0.0212767	-0.0207293	-0.0191698	-0.0168574
-5	-0.00321771	-0.00338334	-0.0035567	-0.00373716	-0.00392406	-0.00411662	-0.00431322	-0.00451189	-0.00470987	-0.00490389	-0.00508867	-0.00525774	-0.00540273	-0.00551383	-0.00557715	-0.00557582	-0.00548906	-0.00529281	-0.0049578	-0.00444989	-0.0037318	-0.00276309	-0.0015057	7.49913e-05	0.00200027	0.00427176	0.00686309	0.00970202	0.0126789	0.0156172	0.0183095	0.0204933	0.0219045	0.0222959	0.0214614	0.0193214	0.0158711	0.0112991	0.00587239	-7.59985e-07	-0.00587125	-0.0112996	-0.0158713	-0.01932	-0.0214628	-0.022294	-0.0219056	-0.0204926	-0.0183096
-4	-0.00258291	-0.00271507	-0.00285309	-0.00299638	-0.00314437	-0.0032963	-0.00345044	-0.00360468	-0.00375695	-0.0039048	-0.0040431	-0.00416525	-0.0042639	-0.00433087	-0.00435347	-0.00431577	-0.0041991	-0.00398238	-0.00363957	-0.00313999	-0.00245029	-0.00153458	-0.000359305	0.00110575	0.00287843	0.00495841	0.00731986	0.00989536	0.0125835	0.0152222	0.0176219	0.0195437	0.0207477	0.0210107	0.0201466	0.0180855	0.0148252	0.0105396	0.00547323	-6.88546e-07	-0.0054722	-0.01054	-0.0148254	-0.0180842	-0.0201479	-0.0210089	-0.0207488	-0.019543	-0.017622
-3	-0.00194215	-0.00204103	-0.00214412	-0.00225091	-0.00236092	-0.00247348	-0.00258713	-0.00270006	-0.00281052	-0.00291653	-0.00301422	-0.00309858	-0.00316239	-0.00319712	-0.00319378	-0.00314271	-0.00302835	-0.00283036	-0.00252675	-0.00209393	-0.00150547	-0.000731889	0.000254048	0.0014764	0.0029489	0.00467014	0.00661779	0.00873544	0.0109386	0.013093	0.0150416	0.0165879	0.0175348	0.0176993	0.0169296	0.0151693	0.012418	0.00881999	0.00457782	-5.65012e-07	-0.00457698	-0.00882033	-0.0124181	-0.0151682	-0.0169307	-0.017698	-0.0175357	-0.0165873	-0.0150417
-2	-0.00129707	-0.00136285	-0.00143139	-0.00150228	-0.00157509	-0.00164934	-0.00172417	-0.00179847	-0.00187049	-0.00193827	-0.0020001	-0.00205388	-0.00209221	-0.0021051	-0.00208886	-0.00204336	-0.00195712	-0.00180968	-0.00158398	-0.00126611	-0.000838628	-0.000280158	0.00042873	0.00130463	0.00235673	0.00358344	0.00496842	0.00647127	0.0080316	0.00955337	0.0109247	0.0120062	0.012658	0.0127508	0.0121774	0.0108983	0.00891401	0.00632749	0.00328303	-4.00173e-07	-0.00328243	-0.00632773	-0.00891413	-0.0108976	-0.0121782	-0.0127499	-0.0126587	-0.0120058	-0.0109248
-1	-0.00064932	-0.000682078	-0.000716271	-0.000751623	-0.00078786	-0.000824702	-0.000861837	-0.000898823	-0.000934426	-0.000967225	-0.000996999	-0.00102362	-0.00104183	-0.00104398	-0.00102982	-0.00100348	-0.000958674	-0.00088106	-0.000760843	-0.000592557	-0.00036793	-7.55115e-05	0.000294917	0.000751758	0.00129958	0.00193737	0.00265651	0.00343594	0.00424423	0.0050313	0.00573899	0.00629511	0.00662727	0.00666837	0.00636282	0.00569054	0.00465214	0.00330115	0.00171249	-2.06317e-07	-0.00171217	-0.00330128	-0.00465223	-0.00569016	-0.00636308	-0.00666767	-0.0066275	-0.00629492	-0.00573907
0	-2.55131e-07	-7.21518e-08	-3.5448e-09	2.0245e-09	-4.10901e-09	1.40359e-08	4.7859e-09	-8.61781e-08	-1.184e-07	6.62701e-08	9.5568e-08	-5.29263e-07	-9.34234e-07	3.50727e-07	2.28093e-06	2.27614e-06	5.54907e-07	-5.08454e-07	-3.37378e-07	-5.07205e-08	-1.19736e-07	-2.51261e-07	-2.94185e-07	-3.2363e-07	-3.8323e-07	-4.4913e-07	-5.02397e-07	-5.41992e-07	-5.82574e-07	-6.66719e-07	-7.60813e-07	-6.4171e-07	-2.36793e-07	2.36411e-08	-1.74262e-07	-4.58126e-07	-4.40867e-07	-2.51568e-07	-1.03722e-07	2.2538e-09	1.19727e-07	2.46554e-07	3.62855e-07	4.62016e-07	5.43301e-07	6.08557e-07	6.58701e-07	6.72428e-07	6.21044e-07
1	0.000648995	0.000681997	0.000716273	0.000751627	0.000787864	0.000824754	0.000861872	0.000898671	0.000934258	0.000967573	0.00099737	0.00102219	0.00103928	0.00104515	0.00103658	0.00101032	0.000960723	0.000880153	0.000760484	0.000593126	0.000368482	7.59006e-05	-0.000294418	-0.000751062	-0.00129874	-0.00193647	-0.00265558	-0.00343491	-0.00424297	-0.00502991	-0.00573762	-0.00629359	-0.00662529	-0.00666619	-0.00636111	-0.00568948	-0.00465141	-0.00330058	-0.00171216	2.09324e-07	0.00171187	0.0033007	0.00465139	0.0056891	0.00636184	0.0066663	0.00662605	0.00629342	0.00573753
2	0.00129704	0.00136283	0.00143139	0.00150228	0.00157508	0.00164933	0.00172415	0.0017985	0.00187075	0.00193897	0.0020005	0.00205221	0.00208936	0.00210623	0.00209589	0.00205042	0.00195899	0.00180832	0.0015831	0.00126609	0.00083844	0.000279605	-0.000429387	-0.0013053	-0.00235752	-0.00358452	-0.00496991	-0.00647301	-0.0080333	-0.00955502	-0.0109265	-0.012008	-0.0126598	-0.0127526	-0.012179	-0.0108998	-0.00891519	-0.00632831	-0.00328344	4.00663e-07	0.00328285	0.00632854	0.00891529	0.010899	0.0121799	0.0127517	0.0126606	0.0120076	0.0109265
3	0.0019422	0.00204101	0.00214412	0.00225096	0.00236093	0.00247338	0.00258708	0.00270055	0.00281158	0.00291754	0.00301454	0.00309792	0.00316142	0.00319766	0.00319638	0.00314526	0.00302902	0.00282998	0.00252671	0.00209436	0.00150594	0.000732346	-0.000253467	-0.00147562	-0.00294794	-0.00466905	-0.00661662	-0.00873408	-0.0109369	-0.013091	-0.0150393	-0.0165856	-0.0175325	-0.0176971	-0.0169275	-0.0151673	-0.0124163	-0.00881886	-0.00457725	5.64049e-07	0.0045764	0.0088192	0.0124165	0.0151663	0.0169285	0.0176956	0.0175333	0.016585	0.0150395
4	0.00258292	0.00271503	0.00285308	0.00299642	0.00314437	0.00329616	0.00345036	0.00360518	0.00375797	0.00390553	0.00404316	0.00416528	0.00426418	0.0043307	0.00435244	0.00431458	0.00419845	0.00398215	0.00363936	0.00313967	0.00244989	0.00153409	0.000358686	-0.00110655	-0.00287944	-0.00495959	-0.0073212	-0.00989694	-0.0125854	-0.0152246	-0.0176245	-0.0195465	-0.0207507	-0.0210136	-0.0201494	-0.0180879	-0.0148272	-0.010541	-0.00547399	6.87405e-07	0.00547295	0.0105414	0.0148274	0.0180867	0.0201506	0.0210119	0.0207517	0.0195458	0.0176246
5	0.0032177	0.00338332	0.0035567	0.00373718	0.00392407	0.00411659	0.00431322	0.00451205	0.00471018	0.0049041	0.0050887	0.00525787	0.005403	0.00551381	0.00557664	0.00557528	0.00548895	0.00529302	0.00495806	0.00445016	0.00373215	0.00276357	0.00150632	-7.4244e-05	-0.00199936	-0.0042705	-0.00686128	-0.00969981	-0.0126765	-0.0156147	-0.0183067	-0.0204903	-0.0219013	-0.0222927	-0.0214583	-0.0193185	-0.0158687	-0.0112975	-0.00587156	7.58896e-07	0.00587042	0.011298	0.015869	0.0193172	0.0214597	0.0222908	0.0219025	0.0204895	0.0183068
6	0.00384482	0.0040441	0.00425314	0.00447137	0.0046982	0.0049329	0.00517403	0.00541971	0.00566707	0.00591259	0.00615109	0.00637633	0.00657955	0.00675024	0.00687434	0.00693511	0.00691111	0.00677694	0.00650213	0.00605146	0.00538618	0.00446396	0.00324454	0.00169081	-0.000221059	-0.00249527	-0.00510797	-0.00798937	-0.0110314	-0.0140577	-0.0168599	-0.0191735	-0.0207312	-0.0212816	-0.0206142	-0.0186452	-0.0153663	-0.0109645	-0.00570574	7.69839e-07	0.00570459	0.010965	0.0153666	0.0186438	0.0206157	0.0212798	0.0207324	0.0191727	0.01686
7	0.00446234	0.00469534	0.00494031	0.00519684	0.00546451	0.00574279	0.00603044	0.00632582	0.00662631	0.00692869	0.00722812	0.00751872	0.0077922	0.0080386	0.00824446	0.00839367	0.00846562	0.00843591	0.0082751	0.00794907	0.00742005	0.0066466	0.00558886	0.00420939	0.00248275	0.000401297	-0.00201667	-0.00471034	-0.00758312	-0.0104744	-0.0131935	-0.0154956	-0.0171332	-0.0178712	-0.0175114	-0.0159722	-0.0132409	-0.00948557	-0.0049471	7.14658e-07	0.00494604	0.00948599	0.0132411	0.0159708	0.0175127	0.0178694	0.0171343	0.015495	0.0131936
8	0.00506817	0.00533483	0.00561582	0.005911	0.00622023	0.00654325	0.00687918	0.0072268	0.00758399	0.0079481	0.00831501	0.00867968	0.00903489	0.0093719	0.00967882	0.00994138	0.0101412	0.0102565	0.0102607	0.0101232	0.00980972	0.00928228	0.00850383	0.00743871	0.00606091	0.00435878	0.00234225	5.67322e-05	-0.00242209	-0.00496424	-0.0074136	-0.00956733	-0.0112187	-0.0121691	-0.0122497	-0.0113863	-0.00956217	-0.0069094	-0.00362076	5.95054e-07	0.00361987	0.00690975	0.00956237	0.0113852	0.0122507	0.0121676	0.0112196	0.00956679	0.00741366
9	0.00566013	0.00596015	0.00627703	0.00661095	0.00696213	0.00733069	0.00771624	0.00811811	0.00853493	0.00896484	0.00940482	0.00985106	0.0102979	0.0107386	0.0111635	0.0115612	0.0119168	0.0122125	0.0124265	0.0125336	0.0125049	0.0123084	0.0119121	0.0112838	0.0103978	0.00923809	0.00780378	0.00611933	0.00423136	0.00222634	0.00021059	-0.00167365	-0.0032797	-0.00446316	-0.00509907	-0.00512641	-0.00452348	-0.00337233	-0.00179714	4.18792e-07	0.00179652	0.00337257	0.00452363	0.00512564	0.00509984	0.00446217	0.00328033	0.00167331	-0.000210597
10	0.00623589	0.00656875	0.00692106	0.00729347	0.00768658	0.00810096	0.00853684	0.00899424	0.00947267	0.00997131	0.0104885	0.0110219	0.0115681	0.0121224	0.0126785	0.0132284	0.0137616	0.0142655	0.0147243	0.0151195	0.0154296	0.0156301	0.0156953	0.0155982	0.015314	0.0148217	0.0141078	0.0131715	0.0120242	0.010699	0.00924092	0.00771741	0.00620064	0.00476755	0.00348813	0.00240636	0.00154888	0.000894949	0.000404312	1.99967e-07	-0.000404608	-0.000894841	-0.0015488	-0.00240674	-0.00348776	-0.004768	-0.00620036	-0.00771751	-0.009241
11	0.00679305	0.0071579	0.00754488	0.00795509	0.00838961	0.0088495	0.00933566	0.00984892	0.0103898	0.0109586	0.0115553	0.0121794	0.0128295	0.0135039	0.0141996	0.0149127	0.0156377	0.0163679	0.0170941	0.0178056	0.0184889	0.0191283	0.0197051	0.0201979	0.0205831	0.0208344	0.0209243	0.0208241	0.0205059	0.0199438	0.019115	0.0180037	0.0165993	0.0149039	0.0129263	0.0106914	0.00823106	0.00559246	0.00282822	-4.27072e-08	-0.00282815	-0.00559249	-0.00823106	-0.0106913	-0.0129263	-0.0149037	-0.0165994	-0.0180035	-0.0191152
12	0.00732918	0.00772486	0.00814535	0.00859222	0.00906706	0.00957143	0.010107	0.0106754	0.0112783	0.0119172	0.0125936	0.013309	0.0140645	0.0148612	0.0156997	0.0165805	0.017503	0.0184667	0.0194694	0.0205083	0.0215781	0.0226717	0.0237778	0.0248804	0.0259567	0.0269746	0.0278919	0.0286509	0.0291835	0.0294031	0.0292175	0.028526	0.0272341	0.0252677	0.0225738	0.0191581	0.0150585	0.0103914	0.00530423	-2.88874e-07	-0.00530379	-0.0103916	-0.0150586	-0.0191576	-0.0225743	-0.025267	-0.0272347	-0.0285256	-0.0292176
13	0.00784185	0.00826686	0.00871928	0.00920118	0.00971464	0.0102618	0.0108449	0.0114666	0.0121296	0.0128366	0.0135909	0.0143956	0.0152545	0.0161713	0.0171503	0.0181958	0.0193127	0.0205059	0.0217799	0.0231393	0.0245866	0.0261223	0.0277417	0.0294334	0.0311747	0.0329268	0.034633	0.0362074	0.0375429	0.0384955	0.0389073	0.0385982	0.0373952	0.0351535	0.0317631	0.0272131	0.0215479	0.0149496	0.00765511	-5.17469e-07	-0.00765433	-0.0149499	-0.0215481	-0.0272122	-0.031764	-0.0351521	-0.037396	-0.0385976	-0.0389075
14	0.00832871	0.00878122	0.0092636	0.00977841	0.0103282	0.0109156	0.0115436	0.0122157	0.0129355	0.013707	0.0145349	0.0154244	0.0163813	0.0174118	0.0185234	0.0197245	0.0210241	0.0224324	0.0239597	0.0256167	0.0274126	0.0293541	0.0314417	0.0336668	0.0360058	0.0384132	0.0408177	0.0431078	0.0451413	0.0467234	0.047639	0.0476393	0.0464838	0.0439684	0.0399352	0.0343608	0.0272965	0.0189824	0.00973349	-7.11192e-07	-0.00973242	-0.0189828	-0.0272967	-0.0343595	-0.0399365	-0.0439666	-0.046485	-0.0476383	-0.0476393
15	0.00878752	0.00926536	0.00977534	0.0103204	0.0109037	0.0115281	0.0121975	0.0129158	0.0136878	0.0145186	0.0154141	0.0163809	0.0174269	0.0185607	0.0197926	0.0211338	0.022597	0.0241964	0.025947	0.0278644	0.0299622	0.0322519	0.0347367	0.0374093	0.0402438	0.0431874	0.0461561	0.0490157	0.0515953	0.0536589	0.0549459	0.0551547	0.0539932	0.0512128	0.0466207	0.0401857	0.0319675	0.0222521	0.0114165	-8.55949e-07	-0.0114152	-0.0222526	-0.0319677	-0.0401842	-0.0466222	-0.0512106	-0.0539947	-0.0551536	-0.0549463
16	0.00921626	0.00971698	0.0102518	0.0108242	0.0114374	0.0120951	0.0128014	0.013561	0.0143795	0.0152627	0.0162179	0.0172526	0.0183765	0.0196002	0.0209358	0.0223967	0.0239984	0.025758	0.0276936	0.0298237	0.0321648	0.0347306	0.0375251	0.0405405	0.0437472	0.0470851	0.050459	0.0537171	0.0566662	0.0590415	0.0605506	0.0608564	0.0596333	0.0566051	0.0515584	0.04446	0.0353775	0.0246303	0.0126379	-9.46073e-07	-0.0126365	-0.0246309	-0.0353778	-0.0444583	-0.0515601	-0.0566027	-0.0596349	-0.0608552	-0.060551
17	0.0096131	0.0101339	0.0106906	0.0112868	0.0119262	0.0126126	0.0133508	0.0141459	0.0150041	0.0159319	0.0169372	0.0180289	0.0192173	0.0205145	0.0219339	0.0234904	0.0252011	0.0270847	0.0291605	0.0314486	0.0339661	0.0367265	0.0397331	0.0429756	0.04642	0.0499987	0.0536072	0.0570817	0.0602153	0.0627263	0.0643048	0.0645969	0.0632615	0.0600124	0.0546295	0.0470827	0.0374477	0.0260625	0.01337	-9.81448e-07	-0.0133686	-0.0260631	-0.0374479	-0.047081	-0.0546312	-0.0600099	-0.0632632	-0.0645956	-0.0643053
18	0.00997657	0.0105146	0.0110897	0.011706	0.0123673	0.0130777	0.0138423	0.0146664	0.0155567	0.0165202	0.0175653	0.0187016	0.01994	0.0212928	0.0227743	0.0244003	0.0261881	0.0281569	0.0303259	0.0327147	0.0353394	0.0382116	0.0413316	0.0446857	0.0482348	0.0519046	0.0555837	0.0591021	0.0622472	0.0647315	0.0662417	0.0664237	0.0649381	0.0615036	0.0559063	0.0481235	0.0382377	0.0265928	0.0136362	-9.67943e-07	-0.0136347	-0.0265935	-0.038238	-0.0481217	-0.055908	-0.0615011	-0.0649398	-0.0664223	-0.0662421
19	0.0103054	0.0108574	0.0114476	0.01208	0.0127587	0.0134879	0.0142728	0.015119	0.0160334	0.0170232	0.0180971	0.0192647	0.0205373	0.0219271	0.0234483	0.0251167	0.0269491	0.0289638	0.0311787	0.0336116	0.0362759	0.0391798	0.0423197	0.0456769	0.0492075	0.0528319	0.0564351	0.0598462	0.0628536	0.0651746	0.0665037	0.0665014	0.0648441	0.0612681	0.0555754	0.0477532	0.0378902	0.0263238	0.0134899	-9.14842e-07	-0.0134886	-0.0263244	-0.0378905	-0.0477516	-0.055577	-0.0612657	-0.0648458	-0.0665001	-0.066504
20	0.0105988	0.0111615	0.0117631	0.0124075	0.0130989	0.0138415	0.0146406	0.015502	0.0164322	0.0174387	0.0185301	0.0197157	0.0210066	0.0224147	0.0239536	0.025638	0.0274835	0.0295067	0.0317231	0.0341475	0.0367896	0.0396534	0.0427305	0.0459967	0.0494037	0.0528689	0.0562767	0.0594592	0.0622118	0.0642653	0.0653319	0.0650973	0.0632643	0.0595954	0.0539157	0.0462238	0.0366124	0.0254031	0.0130082	-8.33106e-07	-0.013007	-0.0254037	-0.0366126	-0.0462224	-0.0539171	-0.0595932	-0.0632659	-0.0650961	-0.065332
21	0.010856	0.0114262	0.0120355	0.0126878	0.0133871	0.0141378	0.014945	0.0158142	0.0167521	0.0177657	0.0188633	0.0200539	0.0213479	0.0227564	0.0242918	0.0259673	0.0277967	0.029794	0.0319719	0.0343414	0.0369079	0.0396706	0.0426162	0.0457153	0.0489164	0.0521359	0.0552599	0.0581268	0.0605432	0.0622611	0.0630176	0.0625301	0.0605342	0.0568239	0.0512511	0.0438258	0.0346426	0.0240004	0.0122791	-7.34351e-07	-0.012278	-0.0240009	-0.0346427	-0.0438245	-0.0512524	-0.056822	-0.0605357	-0.062529	-0.0630178
22	0.0110769	0.0116514	0.0122648	0.0129208	0.0136234	0.0143768	0.015186	0.0160562	0.0169937	0.0180052	0.0190985	0.0202818	0.0215645	0.0229568	0.0244693	0.0261137	0.0279011	0.0298429	0.0319481	0.0342239	0.0366711	0.0392842	0.0420452	0.0449205	0.0478564	0.05077	0.0535516	0.0560485	0.058082	0.0594297	0.059858	0.0591198	0.0569861	0.0532847	0.0478954	0.0408384	0.0322081	0.0222766	0.0113859	-6.28799e-07	-0.011385	-0.022277	-0.0322082	-0.0408373	-0.0478965	-0.053283	-0.0569873	-0.0591187	-0.0598585
23	0.0112617	0.0118373	0.0124512	0.0131069	0.0138083	0.0145593	0.0153646	0.0162291	0.0171588	0.0181596	0.0192386	0.0204033	0.0216618	0.0230229	0.0244957	0.0260895	0.0278131	0.0296746	0.0316797	0.0338313	0.0361263	0.0385544	0.0410938	0.0437079	0.0463418	0.048915	0.0513235	0.0534268	0.0550635	0.0560378	0.0561463	0.0551784	0.0529414	0.0492957	0.044148	0.0375268	0.0295244	0.0203838	0.0104074	-5.25503e-07	-0.0104066	-0.0203842	-0.0295245	-0.0375259	-0.0441489	-0.0492943	-0.0529424	-0.0551774	-0.0561468
24	0.0114109	0.0119846	0.0125955	0.0132471	0.013943	0.0146868	0.0154827	0.0163355	0.0172503	0.0182325	0.0192884	0.0204244	0.0216474	0.0229647	0.0243834	0.0259107	0.0275528	0.0293147	0.0311987	0.0332041	0.0353236	0.0375435	0.0398387	0.0421707	0.044485	0.0467044	0.0487324	0.0504425	0.0516918	0.0523105	0.0521251	0.0509602	0.0486579	0.0451088	0.0402434	0.0340968	0.0267572	0.0184385	0.00940368	-4.29846e-07	-0.00940303	-0.0184388	-0.0267572	-0.0340961	-0.0402442	-0.0451076	-0.0486587	-0.0509594	-0.0521255
25	0.0115254	0.0120942	0.0126989	0.0133428	0.0140291	0.0147612	0.0155429	0.0163783	0.017272	0.0182288	0.0192538	0.0203525	0.0215305	0.0227933	0.0241464	0.0255948	0.0271419	0.0287903	0.0305388	0.0323836	0.0343142	0.0363137	0.0383551	0.0403993	0.0423931	0.0442639	0.0459238	0.0472605	0.0481496	0.0484464	0.0480055	0.0466839	0.0443548	0.0409355	0.036377	0.0307184	0.0240428	0.0165359	0.00842368	-3.4528e-07	-0.00842315	-0.0165362	-0.0240428	-0.0307179	-0.0363777	-0.0409345	-0.0443556	-0.0466832	-0.0480059
26	0.0116063	0.0121674	0.0127629	0.0133958	0.014069	0.0147853	0.0155483	0.0163615	0.0172287	0.018154	0.0191416	0.0201959	0.021321	0.0225212	0.0237999	0.02516	0.026603	0.0281285	0.0297329	0.0314094	0.0331453	0.0349213	0.0367096	0.038471	0.0401551	0.041695	0.0430114	0.0440062	0.0445724	0.0445891	0.0439362	0.0424994	0.0401791	0.0369148	0.0326746	0.0274995	0.0214664	0.0147351	0.00749759	-2.73053e-07	-0.00749717	-0.0147353	-0.0214664	-0.027499	-0.0326751	-0.036914	-0.0401797	-0.0424988	-0.0439365
27	0.0116548	0.0122057	0.0127894	0.0134083	0.0140651	0.0147622	0.0155026	0.0162892	0.0171254	0.0180143	0.0189593	0.0199634	0.0210299	0.0221612	0.0233593	0.0246253	0.0259585	0.0273563	0.0288131	0.0303198	0.0318618	0.0334188	0.0349625	0.0364552	0.0378496	0.0390849	0.0400911	0.040783	0.04107	0.0408523	0.0400325	0.0385205	0.0362396	0.0331475	0.0292257	0.0245154	0.0190868	0.0130764	0.00664594	-2.13333e-07	-0.00664561	-0.0130766	-0.0190868	-0.0245151	-0.0292261	-0.0331469	-0.0362401	-0.03852	-0.0400328
28	0.0116725	0.0122111	0.0127805	0.0133828	0.0140203	0.0146951	0.0154096	0.0161663	0.0169677	0.0178163	0.0187145	0.0196644	0.0206678	0.0217263	0.02284	0.0240085	0.0252294	0.0264984	0.027808	0.0291476	0.0305017	0.0318492	0.0331624	0.0344057	0.0355353	0.036497	0.0372293	0.0376597	0.0377121	0.0373052	0.0363607	0.0348091	0.0325925	0.0296828	0.0260716	0.0217991	0.0169286	0.0115759	0.00587675	-1.65104e-07	-0.00587649	-0.0115761	-0.0169286	-0.0217988	-0.0260719	-0.0296823	-0.0325929	-0.0348087	-0.036361
29	0.0116611	0.0121854	0.0127384	0.0133219	0.0139378	0.0145877	0.0152737	0.0159977	0.0167614	0.0175667	0.0184151	0.0193079	0.0202458	0.0212291	0.0222567	0.0233269	0.0244358	0.0255777	0.0267441	0.0279232	0.029099	0.0302505	0.0313512	0.0323679	0.0332609	0.0339819	0.0344777	0.0346876	0.0345487	0.0339949	0.0329638	0.0314027	0.0292689	0.0265454	0.023231	0.0193638	0.0150005	0.0102389	0.00519233	-1.26895e-07	-0.00519213	-0.010239	-0.0150005	-0.0193636	-0.0232312	-0.026545	-0.0292693	-0.0314023	-0.0329639
30	0.0116225	0.0121309	0.0126657	0.0132285	0.0138207	0.0144439	0.0150993	0.0157883	0.0165121	0.0172721	0.0180689	0.0189029	0.019774	0.0206813	0.0216229	0.0225958	0.0235951	0.0246142	0.0256436	0.026671	0.0276805	0.0286516	0.0295595	0.0303736	0.0310585	0.0315716	0.0318673	0.0318953	0.0316042	0.0309407	0.0298555	0.0283092	0.0262715	0.0237331	0.0206979	0.0172017	0.0132945	0.00905882	0.00458919	-9.71538e-08	-0.00458904	-0.00905891	-0.0132945	-0.0172015	-0.0206981	-0.0237327	-0.0262718	-0.0283089	-0.0298554
31	0.0115588	0.0120498	0.0125648	0.0131053	0.0136724	0.0142673	0.0148908	0.0155433	0.0162257	0.0169391	0.0176833	0.0184581	0.0192622	0.0200943	0.0209513	0.0218296	0.0227234	0.0236255	0.0245259	0.0254124	0.0262691	0.0270768	0.0278123	0.0284481	0.0289527	0.0292893	0.0294192	0.0293006	0.0288914	0.0281495	0.0270367	0.0255241	0.0235904	0.0212321	0.0184566	0.0152965	0.0117962	0.00802488	0.00406147	-7.42971e-08	-0.00406135	-0.00802495	-0.0117962	-0.0152964	-0.0184567	-0.0212318	-0.0235906	-0.0255239	-0.0270367
32	0.0114718	0.0119442	0.0124384	0.0129554	0.0134962	0.0140617	0.0146521	0.0152672	0.0159077	0.0165739	0.0172655	0.0179813	0.0187195	0.0194779	0.0202531	0.0210406	0.0218342	0.0226263	0.0234069	0.0241638	0.0248819	0.0255432	0.0261266	0.0266072	0.0269576	0.0271464	0.027141	0.0269064	0.0264085	0.0256145	0.0244955	0.0230303	0.0212045	0.0190188	0.0164824	0.0136252	0.0104859	0.00712277	0.00360165	-5.67377e-08	-0.00360156	-0.00712282	-0.0104858	-0.0136251	-0.0164825	-0.0190186	-0.0212047	-0.0230301	-0.0244956
33	0.0113636	0.0118165	0.0122891	0.0127819	0.0132955	0.0138306	0.014387	0.0149646	0.0155632	0.0161827	0.0168222	0.01748	0.018154	0.0188414	0.0195382	0.0202397	0.0209393	0.0216293	0.0222998	0.022939	0.0235327	0.0240644	0.0245149	0.0248622	0.0250824	0.0251488	0.0250342	0.0247098	0.0241481	0.0233237	0.0222146	0.0208061	0.0190888	0.0170661	0.0147485	0.0121628	0.00934263	0.00633737	0.00320184	-4.30562e-08	-0.00320177	-0.00633741	-0.00934263	-0.0121627	-0.0147486	-0.017066	-0.0190889	-0.0208059	-0.0222147
34	0.0112363	0.011669	0.0121193	0.0125873	0.0130734	0.0135776	0.0140998	0.0146399	0.0151971	0.0157706	0.016359	0.0169605	0.0175726	0.0181921	0.0188148	0.0194355	0.0200477	0.0206436	0.0212138	0.021747	0.0222301	0.0226479	0.0229833	0.0232171	0.0233286	0.0232951	0.023094	0.022702	0.0220972	0.0212597	0.020173	0.0188271	0.0172167	0.015347	0.0132286	0.0108853	0.00834689	0.0056547	0.00285475	-3.26304e-08	-0.0028547	-0.00565473	-0.00834688	-0.0108853	-0.0132286	-0.0153469	-0.0172169	-0.018827	-0.0201729
35	0.0110918	0.0115039	0.0119315	0.0123745	0.0128328	0.0133063	0.0137946	0.0142975	0.0148139	0.0153425	0.0158815	0.0164289	0.0169819	0.0175371	0.01809	0.0186355	0.0191671	0.0196771	0.0201566	0.0205952	0.0209806	0.0212993	0.0215361	0.0216741	0.0216957	0.0215818	0.0213135	0.0208723	0.0202407	0.0194035	0.0183482	0.0170684	0.0155617	0.0138341	0.0118963	0.00976951	0.0074794	0.00506113	0.00255331	-2.50722e-08	-0.00255327	-0.00506116	-0.0074794	-0.00976947	-0.0118964	-0.013834	-0.0155618	-0.0170683	-0.018348
36	0.0109322	0.0113236	0.0117283	0.0121462	0.0125769	0.0130202	0.0134755	0.013942	0.0144184	0.0149034	0.0153951	0.015891	0.0163882	0.0168831	0.0173713	0.0178475	0.0183054	0.0187379	0.0191363	0.0194911	0.0197912	0.0200243	0.0201772	0.0202352	0.0201832	0.0200053	0.019686	0.0192101	0.0185639	0.0177361	0.0167177	0.0155048	0.0140968	0.0125003	0.0107257	0.00879179	0.00672096	0.00454301	0.00229043	-1.99937e-08	-0.0022904	-0.00454303	-0.00672096	-0.00879176	-0.0107257	-0.0125002	-0.0140969	-0.0155047	-0.0167178
[truncated: 22 more columns]
