# Supplementary material for: Strong confinement of active microalgae leads to inversion of vortex flow and enhanced mixing
Source: eLife. 2021 Nov 22;10:e67663. doi: 10.7554/eLife.67663 (PMC8758135; doi:10.7554/eLife.67663)
Supplement: Figure 5—source data 1. [file elife-67663-fig5-data1.xlsx]

## Sheet: Sheet1
Figure 5A: Normalised radial velocity-velocity correlation of fluid flow
R (micron)	Normalised velocity-velocity correlation of flow fields, Cvv(R)
	H30 Experiment	H10 Experiment	H10 2-Gaussian Brinkman Theory
0	0.9923	0.9938	0.9943
1	0.978	0.9822	0.9836
2	0.943	0.9541	0.9573
3	0.8947	0.9155	0.9206
4	0.8266	0.862	0.8688
5	0.7605	0.8109	0.8189
6	0.6782	0.7484	0.7578
7	0.5942	0.6867	0.6958
8	0.5032	0.6222	0.6308
9	0.4119	0.5597	0.5659
10	0.3355	0.5093	0.5143
11	0.2583	0.4597	0.4649
12	0.1879	0.4154	0.4163
13	0.124	0.3756	0.3771
14	0.0681	0.3404	0.3393
15	0.0229	0.3127	0.315
16	-0.018	0.2876	0.2924
17	-0.0485	0.2677	0.2737
18	-0.0811	0.2485	0.2617
19	-0.1013	0.2304	0.2438
20	-0.1235	0.2167	0.2377
21	-0.1391	0.2011	0.2252
22	-0.1542	0.1871	0.2175
23	-0.1657	0.1745	0.2099
24	-0.1704	0.1581	0.1951
25	-0.1775	0.1472	0.1902
26	-0.1774	0.1305	0.1762
27	-0.1773	0.1161	0.1666
28	-0.172	0.0984	0.1513
29	-0.1635	0.0792	0.1336
30	-0.1563	0.0598	0.1179
31	-0.144	0.038	0.0971
32	-0.1336	0.0108	0.0707
33	-0.1174	-0.0075	0.0516
34	-0.1023	-0.0285	0.0302
35	-0.0909	-0.0589	-0.0038
36	-0.0742	-0.0702	-0.0173
37	-0.0621	-0.0976	-0.0496
38	-0.0444	-0.0998	-0.0542
39	-0.031	-0.1161	-0.0771
40	-0.0201	-0.1389	-0.1096
41	-0.0063	-0.1291	-0.1027
42	0.0049	-0.1385	-0.1196
43	0.0162	-0.1283	-0.1131
44	0.025	-0.1281	-0.1198
45	0.0316	-0.1242	-0.122
46	0.0393	-0.1082	-0.1066
47	0.0427	-0.1035	-0.1075
48	0.0498	-0.0804	-0.0813
49	0.0503	-0.0725	-0.0773
50	0.0535	-0.0546	-0.0574
51	0.0543	-0.0379	-0.0403
52	0.0539	-0.0251	-0.0268
53	0.0581	-0.0029	0.0021
54	0.055	0.008	0.0125
55	0.0549	0.0243	0.0326
56	0.0519	0.0361	0.0458
57	0.0496	0.0486	0.0611
58	0.0485	0.0628	0.0787
59	0.0446	0.0713	0.088
60	0.042	0.0817	0.1009
